# Supplementary material for: Coral anthozoan-specific opsins employ a novel chloride counterion for spectral tuning
Source: eLife. 2025 Sep 1;14:RP105451. doi: 10.7554/eLife.105451 (PMC12401545; doi:10.7554/eLife.105451)
Supplement: Figure 1—source data 1. [file elife-105451-fig1-data1.xlsx]

## Sheet: Fig1C
wavelength [nm]	C_Abs_Antho2a_dark_pH6_5_140NaCl	C_Abs_Antho2c_dark_pH6_5_140NaCl	C_Abs_Antho2e_dark_pH6_5_140NaCl
750	0.000121911	-5.56738e-05	-4.05705e-05
749	6.1327e-05	-0.00015051	-0.000146276
748	0.000118605	-4.02482e-05	2.0585e-06
747	2.1571e-05	-0.000223823	-0.000163323
746	0.000143393	-0.000310763	-0.000206919
745	0.000200333	-0.000231567	-5.68441e-05
744	5.32517e-05	-0.0001968	-1.01396e-05
743	0.000130384	-0.000209588	-3.17014e-05
742	0.000182157	-0.00023012	-0.000195313
741	9.99936e-05	-0.000281182	-0.000456539
740	6.81362e-05	-0.000343251	-0.000169995
739	1.092e-05	-0.00012404	-0.000143147
738	-0.000218052	-0.00010048	-0.000150253
737	-0.000230149	-0.000194049	-0.000166132
736	-6.61566e-05	-0.000200643	-0.000210676
735	3.25804e-05	-0.000238002	-0.000214322
734	-9.36177e-05	-0.000154291	-1.45906e-05
733	-0.000162497	-0.000121746	-8.54356e-05
732	6.41573e-05	-0.000136612	-5.24884e-05
731	0.000128819	-0.000167318	1.4489e-05
730	0.000200114	-0.000191434	-9.27043e-06
729	2.06416e-05	-6.58511e-05	6.43622e-05
728	-3.33314e-05	-9.50732e-05	4.28834e-05
727	0.000135907	-0.000150117	-1.32867e-05
726	0.000127673	-0.000127388	-1.22577e-05
725	0.000117496	-0.00020329	-0.000243407
724	0.000123733	-0.000238181	-0.000253841
723	-7.81336e-05	-0.000151185	-9.31551e-05
722	-2.31937e-05	-0.000208501	-0.000135445
721	-4.40413e-05	-0.00017904	-1.42938e-05
720	-9.5716e-05	-0.000169082	-6.15955e-05
719	0.000103812	-5.52217e-05	-0.000110279
718	2.34916e-05	-0.000159423	-7.82468e-05
717	2.16111e-05	-0.000179576	-0.000168566
716	-9.7102e-05	-0.000243325	-0.000171679
715	4.91313e-05	-0.000204044	-7.92377e-05
714	1.29195e-05	-0.000155897	-5.70039e-05
713	-0.000108051	-0.000114122	-9.5552e-05
712	-1.9392e-05	-4.049e-05	-8.44034e-05
711	-0.000143708	-0.000235408	-0.000165441
710	-0.000133174	-0.000249922	-0.000316682
709	-0.000133254	-0.000171973	-0.000111033
708	-6.61567e-05	-6.91588e-05	-0.000105846
707	2.48973e-05	-0.000152195	-2.63714e-05
706	1.2345e-05	-0.000230815	-2.13048e-05
705	-7.79034e-06	-0.000245881	-9.85175e-05
704	9.85286e-05	-0.000232495	-0.000102105
703	0.000251791	-6.99286e-05	-9.60052e-05
702	0.000317047	-1.66138e-05	-3.3871e-06
701	0.000325342	-3.72224e-05	2.83709e-05
700	8.3145e-05	-0.000133998	-5.95778e-05
699	4.35069e-05	-0.00023341	-0.00013699
698	0.000282082	-0.000169996	-5.60131e-05
697	0.000280243	-0.000205549	-0.000101369
696	0.000253908	-0.000143583	-0.000186327
695	0.000213836	-0.000105904	-0.000186684
694	3.1055e-05	-0.000125268	-0.000163955
693	-2.96084e-05	-5.52599e-06	-8.63266e-06
692	-2.14716e-05	-2.51433e-05	2.56767e-05
691	0.000207976	-9.9073e-05	-0.000159343
690	-3.20433e-05	-0.000155896	-2.58956e-05
689	6.41383e-05	-9.86967e-05	0.000106257
688	-7.7308e-06	9.96036e-06	6.3137e-05
687	-0.000159171	-3.4152e-05	0.000155358
686	5.49552e-06	-0.000268789	-1.59024e-05
685	3.2124e-05	-0.000310544	-2.6354e-05
684	0.000187366	-0.000240475	-1.78461e-06
683	6.17629e-05	-8.6997e-05	9.27931e-05
682	-2.8223e-05	-4.92234e-05	9.317e-05
681	0.000215976	-5.11804e-05	0.000183906
680	-4.26757e-05	-9.85797e-06	0.000137279
679	-8.72415e-05	-0.000182701	-1.51875e-05
678	0.000129454	-0.000187216	2.20543e-05
677	-1.1532e-05	-0.000202087	4.65867e-05
676	0.000106052	-0.000213767	-1.0031e-07
675	1.33153e-05	-5.98539e-05	-4.50239e-05
674	2.91334e-05	-5.56549e-05	5.91724e-07
673	-0.000102686	0.000109663	1.50663e-05
672	-0.00017303	7.93994e-06	4.12567e-05
671	-5.1486e-05	-0.000202246	-4.81252e-06
670	7.41567e-05	-0.000235134	2.54789e-05
669	0.000120189	-0.000205114	5.79897e-05
668	0.000142125	-0.000140571	1.71828e-05
667	-9.20345e-05	-6.06656e-05	0.000102951
666	-6.64265e-06	-2.86722e-05	2.80711e-05
665	-5.13273e-05	-4.04084e-06	-2.74808e-05
664	0.00020362	-8.69167e-05	2.58333e-05
663	0.000305998	-0.00015146	0.000102833
662	0.000100528	9.52298e-06	0.000117406
661	8.19574e-05	-0.000136219	2.44273e-05
660	0.000210233	-0.000167635	1.61947e-05
659	0.000202096	-0.000131264	0.000112573
658	0.000134127	-0.000174369	0.000100358
657	0.000158935	-9.48973e-05	0.000190223
656	0.000152777	-9.22733e-06	0.000154133
655	0.000141334	-9.58498e-05	9.64568e-05
654	0.000204829	7.36632e-06	0.00011287
653	0.000148461	3.51187e-05	5.18887e-05
652	0.000230822	-0.000190625	-0.000142532
651	0.0001879	-0.00019751	-4.8687e-05
650	0.000154044	-0.000171378	-2.43546e-05
649	0.000212034	-0.000153601	-6.12179e-05
648	0.000309939	-0.000175932	-3.05234e-06
647	0.000319482	-5.73386e-05	8.03814e-05
646	2.14326e-05	-3.16901e-06	0.000130891
645	0.000121832	-9.5233e-05	8.83003e-05
644	0.000163291	-0.000170407	0.000153277
643	0.000158658	-0.000167817	9.20201e-05
642	0.000153017	0.000125877	0.000221884
641	0.000302514	7.68751e-05	0.000135185
640	0.000357832	-0.000144452	0.000103505
639	0.000307621	-0.000138019	9.40207e-05
638	0.0001247	-0.000171377	-5.70338e-06
637	9.73803e-05	-0.000124158	0.000102632
636	0.000147333	-9.67365e-05	7.07752e-05
635	0.0002135	-8.34725e-05	-2.54625e-05
634	0.000142997	-2.03757e-05	0.000151164
633	0.000232824	5.01716e-05	0.000239225
632	0.000408002	1.51644e-05	0.000256591
631	0.000279469	7.55124e-05	0.000226636
630	0.00020067	9.42618e-05	0.000217608
629	0.000132206	-8.43334e-06	7.74299e-05
628	0.000177802	3.39357e-05	0.000132846
627	0.000215421	0.000151041	0.000176661
626	0.000198711	5.02853e-05	0.000152649
625	0.000414376	-0.000114338	0.000144389
624	0.000238169	3.78326e-05	0.000244076
623	0.000170121	-1.8217e-05	0.00031282
622	0.000324709	-0.000118596	0.000358694
621	0.000329104	-0.000178724	0.000290226
620	0.000538951	-9.80065e-06	0.000216123
619	0.000468051	-4.74779e-05	0.000291155
618	0.000394993	-1.09052e-06	0.000313863
617	0.00024593	1.79537e-05	0.000324814
616	0.000384758	-3.93003e-05	0.000241896
615	0.000501175	9.27951e-05	0.000361228
614	0.000544236	0.00011968	0.000382887
613	0.000616125	-9.02824e-05	0.000263004
612	0.000484108	4.78936e-06	0.000218356
611	0.000381907	0.000218953	0.000358493
610	0.000492245	0.000126375	0.000341505
609	0.000523032	-2.1938e-05	0.000307769
608	0.000464824	-0.000153321	0.000411572
607	0.00050359	-4.19968e-05	0.00044616
606	0.000775306	8.01427e-05	0.000521139
605	0.000694529	7.44166e-06	0.000337825
604	0.000676512	-8.19821e-06	0.000246139
603	0.000894413	-7.62262e-05	0.000259044
602	0.00103726	5.74332e-05	0.000355007
601	0.00131136	0.000135166	0.000402562
600	0.0011385	0.000133697	0.000339071
599	0.00116332	0.00015631	0.000358927
598	0.00105635	6.15902e-06	0.000326379
597	0.0010568	1.871e-05	0.000408187
596	0.0012795	0.000110119	0.000454102
595	0.00141029	-7.03073e-05	0.000359679
594	0.0013538	7.1462e-06	0.000224496
593	0.00147299	8.18093e-05	0.000264089
592	0.00167066	2.8786e-05	0.000397893
591	0.00175229	-3.54999e-05	0.000310307
590	0.0019699	3.64268e-05	0.00030927
589	0.00218099	9.8359e-05	0.000430182
588	0.00226336	7.80849e-05	0.000466435
587	0.00214619	7.68012e-05	0.000409155
586	0.00247711	2.95e-06	0.000288347
585	0.00259475	5.1196e-05	0.000374409
584	0.00276547	1.06899e-05	0.000344393
583	0.00304601	9.24391e-05	0.000465466
582	0.00295878	0.000121326	0.000444773
581	0.00304477	2.25727e-05	0.000307116
580	0.00327752	-2.23754e-05	0.000343231
579	0.00338846	-1.38574e-05	0.000428423
578	0.00359384	3.79513e-05	0.000506725
577	0.00358717	-7.45027e-05	0.000476097
576	0.00403772	4.87446e-05	0.000403021
575	0.00440514	0.000131381	0.000443427
574	0.00459592	7.89765e-05	0.000461703
573	0.00464032	-7.1079e-05	0.000296088
572	0.00491871	1.49654e-05	0.000484529
571	0.00525551	-1.03359e-05	0.000413001
570	0.0056975	6.27186e-05	0.000428699
569	0.00600202	0.000245643	0.000490966
568	0.00621101	0.000232119	0.000430306
567	0.00651813	0.000137462	0.000338039
566	0.00663866	0.00021147	0.000399653
565	0.00676021	0.000172819	0.000484672
564	0.00712619	0.000211052	0.000621262
563	0.00745295	0.000203429	0.000602215
562	0.00780996	0.000188978	0.000469148
561	0.00814471	0.000268408	0.000501342
560	0.00835168	0.00031931	0.00061932
559	0.00883279	0.000204895	0.000503655
558	0.00907268	9.709e-05	0.000484433
557	0.00951971	0.000230497	0.000710477
556	0.0099962	0.000195591	0.000593464
555	0.0104585	0.000241721	0.000516701
554	0.0107476	0.000305907	0.000529314
553	0.0112044	0.000261321	0.000590178
552	0.0115892	0.000309786	0.00058404
551	0.0117038	0.000295988	0.000670241
550	0.0119494	0.000194124	0.000639774
549	0.012381	0.000106793	0.00060261
548	0.0128107	4.99294e-05	0.000560576
547	0.013107	0.000159536	0.000542936
546	0.0133322	0.000230614	0.00056646
545	0.0138916	0.000223508	0.000544955
544	0.0144023	0.000244653	0.000495736
543	0.0148751	0.000136826	0.000423513
542	0.0151347	0.000259026	0.000595446
541	0.0150724	0.000218082	0.000674142
540	0.0156534	0.000244928	0.000819012
539	0.0161848	0.000254052	0.000609206
538	0.0164359	0.000193195	0.000434422
537	0.0168169	0.000443489	0.000648206
536	0.0172836	0.00046885	0.000690557
535	0.0174059	0.00045222	0.000566203
534	0.0176101	0.000474868	0.000474768
533	0.0179915	0.000592811	0.000638824
532	0.0183026	0.000568399	0.000809806
531	0.0187018	0.000629421	0.000763138
530	0.0187464	0.000614056	0.000607122
529	0.019095	0.000424008	0.000635555
528	0.019352	0.000562241	0.000797471
527	0.0197519	0.00072063	0.000814414
526	0.0200207	0.000770704	0.000822197
525	0.0202874	0.000810241	0.000860271
524	0.0204559	0.00089868	0.00088514
523	0.0206975	0.000900659	0.000882919
522	0.0208905	0.000902067	0.000781431
521	0.0209905	0.000885773	0.000731263
520	0.0211133	0.000937821	0.000843064
519	0.0215616	0.00104591	0.000903729
518	0.0215855	0.00115686	0.000834789
517	0.0217239	0.00116634	0.000791372
516	0.0219494	0.00112084	0.000757813
515	0.0221518	0.0012505	0.00064585
514	0.0222146	0.00140202	0.000870249
513	0.0222871	0.00149062	0.0008222
512	0.0226189	0.00163363	0.000863161
511	0.0225544	0.00159947	0.00100763
510	0.0227755	0.00161009	0.000882779
509	0.022745	0.00176056	0.000845839
508	0.0227057	0.00179214	0.000905531
507	0.0229592	0.00183003	0.000894005
506	0.0229101	0.00200756	0.000936097
505	0.0227909	0.00201414	0.000945446
504	0.0226103	0.00224919	0.00099425
503	0.0225219	0.00241447	0.00098997
502	0.0225429	0.00240178	0.000929345
501	0.0227417	0.00268225	0.0010338
500	0.022696	0.00277484	0.00109453
499	0.0227926	0.00273348	0.00106655
498	0.0226309	0.00274334	0.00105196
497	0.022542	0.00289415	0.00104699
496	0.0223461	0.00297152	0.00108896
495	0.0224691	0.00308253	0.00110304
494	0.0225648	0.00327866	0.00119315
493	0.0221488	0.00334805	0.00121396
492	0.0220997	0.00335847	0.00110979
491	0.0220627	0.00341966	0.00115731
490	0.0219922	0.00367917	0.00129828
489	0.0217741	0.00376185	0.00121542
488	0.0216035	0.00369699	0.0011351
487	0.0216181	0.00386163	0.0012604
486	0.0215038	0.0040634	0.00123886
485	0.0214639	0.00415869	0.00120592
484	0.0211245	0.00436816	0.00125159
483	0.0206141	0.00456921	0.00141006
482	0.020612	0.00462641	0.00141341
481	0.0205158	0.00478601	0.0014161
480	0.0202966	0.00468211	0.00138906
479	0.0201238	0.00476018	0.00146279
478	0.0197375	0.00480098	0.00145807
477	0.0193669	0.00504169	0.00145074
476	0.0195304	0.00523404	0.00149545
475	0.0192765	0.00533933	0.00144479
474	0.0190335	0.00544052	0.00153349
473	0.0187961	0.00549676	0.00154526
472	0.0186213	0.00560845	0.0017144
471	0.0183298	0.00575617	0.00159419
470	0.0182504	0.00573882	0.00157433
469	0.0178961	0.00578196	0.00160057
468	0.0176272	0.00591887	0.00179114
467	0.0175585	0.00607558	0.00191142
466	0.0171879	0.00620235	0.00180364
465	0.0167426	0.00626313	0.00175068
464	0.0167526	0.00631562	0.00172165
463	0.0166647	0.00632934	0.00178194
462	0.0162391	0.00635619	0.00177909
461	0.0158258	0.00648048	0.00193191
460	0.0157707	0.00662152	0.00202281
459	0.0155488	0.00665212	0.00199586
458	0.0152831	0.00671793	0.00206906
457	0.0150082	0.00678291	0.00214925
456	0.0148986	0.00692692	0.00221541
455	0.0146779	0.00699402	0.00231835
454	0.0144651	0.00702087	0.00244413
453	0.0144357	0.00698824	0.00231104
452	0.0142458	0.00697238	0.00223072
451	0.0138869	0.00700426	0.00231149
450	0.0133529	0.00701924	0.00222974
449	0.0130586	0.00705048	0.00228158
448	0.0130399	0.00685541	0.00226477
447	0.0129748	0.00690427	0.00230813
446	0.0123955	0.00699954	0.0024014
445	0.0121003	0.00681997	0.00235181
444	0.0120028	0.00675564	0.00231969
443	0.0116271	0.00680235	0.00234996
442	0.0114217	0.00688556	0.00255026
441	0.0112531	0.00688311	0.0025801
440	0.0111731	0.00686212	0.00260709
439	0.0110005	0.00682999	0.0026785
438	0.0108256	0.00668979	0.00264764
437	0.0105711	0.00653194	0.00267096
436	0.0103419	0.00660721	0.00277425
435	0.0100953	0.00672286	0.00285449
434	0.0100592	0.00671569	0.00285469
433	0.00991753	0.00664061	0.00288641
432	0.00987968	0.00640634	0.00277558
431	0.00983875	0.00651653	0.00287063
430	0.00960948	0.0064154	0.00297194
429	0.00949551	0.00630327	0.00301856
428	0.00928211	0.0060583	0.00289409
427	0.00891864	0.00618111	0.00309352
426	0.00871271	0.00615614	0.00313692
425	0.00899558	0.00624519	0.00327286
424	0.00895618	0.0061602	0.0033358
423	0.00878245	0.00603343	0.00344895
422	0.0087359	0.00591588	0.00337595
421	0.00848396	0.00590157	0.003473
420	0.0083409	0.00586001	0.00374215
419	0.0084315	0.00574049	0.0036796
418	0.00836855	0.00568893	0.00356378
417	0.00818613	0.005694	0.00357277
416	0.00801972	0.00546913	0.00356483
415	0.00794894	0.0054788	0.00376473
414	0.007957	0.00550195	0.00387347
413	0.00764781	0.00535582	0.00400703
412	0.00772583	0.00537762	0.00410504
411	0.00799495	0.0054241	0.00413307
410	0.00758427	0.00515193	0.00437238
409	0.00772191	0.00521867	0.00439192
408	0.00774678	0.00504833	0.00427847
407	0.00764436	0.00490767	0.00435111
406	0.00733944	0.00492917	0.00452334
405	0.00730701	0.00495173	0.00469707
404	0.00737195	0.00467281	0.00472905
403	0.00736934	0.00455722	0.00477647
402	0.00712704	0.00454182	0.00495963
401	0.00714682	0.00440219	0.00507468
400	0.00726614	0.00436002	0.00514292
399	0.00739743	0.00414012	0.00529713
398	0.00744833	0.00413234	0.00560437
397	0.00752193	0.00414875	0.0057919
396	0.00717834	0.00398276	0.0059769
395	0.00701722	0.00416322	0.00620914
394	0.0073301	0.00415653	0.00631427
393	0.00726763	0.0040159	0.00648779
392	0.00727258	0.00386761	0.00673459
391	0.00742093	0.00377204	0.00696575
390	0.00731794	0.00374331	0.00715387
389	0.0071997	0.00365901	0.00716611
388	0.00757893	0.00360946	0.00746465
387	0.00761502	0.00352504	0.00776503
386	0.00739462	0.00352432	0.00810437
385	0.00742052	0.00364961	0.00845905
384	0.00772771	0.00357744	0.00865669
383	0.00770627	0.0034006	0.00871284
382	0.00783668	0.00343721	0.00900468
381	0.00784698	0.00341317	0.00930938
380	0.0081283	0.00339519	0.00969247
379	0.00808064	0.00338228	0.00993593
378	0.00814871	0.00330604	0.010123
377	0.00816219	0.00335332	0.0103044
376	0.00822644	0.00341443	0.0105658
375	0.00843816	0.00329575	0.0108285
374	0.00847434	0.00326504	0.0109852
373	0.00840507	0.00333017	0.0111232
372	0.00859032	0.00338983	0.0112845
371	0.0085919	0.00340767	0.0115357
370	0.00862085	0.00327627	0.0117172
369	0.00848674	0.00329745	0.0118473
368	0.00850027	0.00324005	0.0119982
367	0.00885038	0.00326603	0.0120702
366	0.00892512	0.00322192	0.0122225
365	0.00888023	0.00351496	0.0125371
364	0.00894909	0.00350508	0.0125475
363	0.00914011	0.0033748	0.0124876
362	0.00900865	0.00338064	0.0124691
361	0.00876273	0.00343363	0.0126386
360	0.00900154	0.00326694	0.0126386
359	0.00924326	0.00334615	0.0126288
358	0.00943888	0.00322585	0.0126593
357	0.00914266	0.00329088	0.0127091
356	0.00938806	0.00339292	0.0128248
355	0.00944654	0.00343467	0.0130082
354	0.00933956	0.00330311	0.0128005
353	0.00938666	0.00341929	0.0127886
352	0.00960261	0.00337149	0.0128086
351	0.00978905	0.00347174	0.0128431
350	0.00988314	0.00350832	0.0127642
349	0.00984194	0.00351551	0.0127165
348	0.0095831	0.00355043	0.0125614
347	0.00952956	0.0035108	0.0122923
346	0.00973205	0.00344746	0.0122933
345	0.00970693	0.00347017	0.012224
344	0.00949421	0.00360591	0.0122147
343	0.0093341	0.00382776	0.012215
342	0.00938486	0.00381275	0.0121141
341	0.00955636	0.00356107	0.0118291
340	0.00969998	0.00338361	0.0117939
339	0.00968663	0.00340658	0.0120001
338	0.00963934	0.00358285	0.0119922
337	0.00962566	0.00355521	0.0117395
336	0.0096425	0.00339603	0.01166
335	0.00966756	0.00354618	0.0118052
334	0.00945	0.00352254	0.0115808
333	0.00929013	0.00342685	0.0112868
332	0.00933711	0.00341022	0.0112388
331	0.00923853	0.00344232	0.0112369
330	0.00914155	0.00347417	0.0112429
329	0.00930098	0.00340229	0.0110196
328	0.00942407	0.00337393	0.0108738
327	0.00942775	0.00334962	0.0107604
326	0.00933194	0.00336514	0.0107203
325	0.00904257	0.00339724	0.0105284
324	0.00889324	0.00341577	0.0103448
323	0.0090173	0.00324985	0.0104171
322	0.00909861	0.00316864	0.0104985
321	0.00938502	0.00330537	0.0103699
320	0.0093222	0.00339024	0.0104428
319	0.00922629	0.00334182	0.0103661
318	0.00941485	0.00334655	0.0101757
317	0.00937679	0.00355772	0.0103862
316	0.00920671	0.00354151	0.0103554
315	0.00924084	0.00354394	0.0103147
314	0.00916973	0.0034777	0.0102197
313	0.00923732	0.00356768	0.0104022
312	0.00949312	0.00349074	0.0105435
311	0.00979291	0.00347566	0.0108101
310	0.0101501	0.00349967	0.0110831
309	0.010529	0.00337506	0.011315
308	0.0112851	0.0035418	0.0119324
307	0.0120824	0.00382324	0.0129578
306	0.0133123	0.00412569	0.0142079
305	0.0144864	0.00427804	0.0156153
304	0.0162149	0.00463851	0.017392
303	0.0185786	0.00519981	0.0197898
302	0.0210987	0.00566197	0.0223344
301	0.0242935	0.0064231	0.0255576
300	0.028052	0.00728369	0.0296003
299	0.0326598	0.00841479	0.03445
298	0.0380249	0.0096521	0.0397947
297	0.0442468	0.0109417	0.0458571
296	0.0516894	0.0123575	0.0532151
295	0.0605072	0.0142243	0.062112
294	0.0707503	0.0162961	0.0722839
293	0.081374	0.0183721	0.0827821
292	0.0913315	0.0204104	0.092104
291	0.0996136	0.0221232	0.0991679
290	0.106312	0.0232737	0.10424
289	0.11362	0.0248183	0.109042
288	0.122447	0.0265531	0.115189
287	0.131303	0.0282866	0.122747
286	0.139004	0.030133	0.130646
285	0.144744	0.0318362	0.137346
284	0.14877	0.0331424	0.142084
283	0.151842	0.0345167	0.145665
282	0.154314	0.0355069	0.148019
281	0.155868	0.0363451	0.149715
280	0.156035	0.0373187	0.150963
279	0.155316	0.0377453	0.151147
278	0.153962	0.0384981	0.15157
277	0.152263	0.039177	0.151676
276	0.15019	0.0396113	0.151287
275	0.147486	0.0401001	0.150727
274	0.144212	0.0403542	0.149572
273	0.140354	0.040551	0.147937
272	0.136248	0.0407054	0.145939
271	0.132299	0.0406978	0.143938
270	0.128503	0.0407611	0.142001
269	0.124099	0.0408456	0.139805
268	0.119172	0.0407378	0.137128
267	0.114386	0.0406095	0.134457
266	0.110231	0.0404746	0.132015
265	0.105853	0.0404466	0.129325
264	0.101134	0.0401301	0.126237
263	0.0965092	0.0398287	0.123145
262	0.0927473	0.0396896	0.120656
261	0.0893115	0.0392757	0.118239
260	0.0859927	0.0388781	0.115897
259	0.0823633	0.0384122	0.11333
258	0.078566	0.0380337	0.110218
257	0.0747976	0.037332	0.106758
256	0.0720385	0.0367893	0.103936
255	0.0699974	0.0363325	0.101754
254	0.0684043	0.0358202	0.100073
253	0.0668796	0.0349631	0.0980773
252	0.0655692	0.0344568	0.096266
251	0.0649673	0.0337033	0.0946901
250	0.0650381	0.0328842	0.0936703

## Sheet: Fig1D
Time [s]	mean_FoldChangeLuminescence_Antho2a_WT	se_FoldChangeLuminescence_Antho2a_WT	mean_FoldChangeLuminescence_Antho2c_WT	se_FoldChangeLuminescence_Antho2c_WT	mean_FoldChangeLuminescence_Antho2e_WT	se_FoldChangeLuminescence_Antho2e_WT
-51	0.00587814	1.01031	0.996539	0.00590315	1.00398	0.0060569
-50	0.00579034	1.00901	1.00264	0.00113381	1.00046	0.00688854
-49	0.00628808	1.00742	1.00007	0.00110914	0.999227	0.00410047
-48	0.00622876	1.00644	0.996016	0.00216941	1.00238	0.00250051
-47	0.00642451	1.00329	0.999073	0.00549384	0.997513	0.00290722
-46	0.00434463	1.00338	0.999298	0.00102432	0.99886	0.00333039
-45	0.00591976	1.00428	1.00199	0.00280503	0.996674	0.00130905
-44	0.00574969	1.00214	1.00024	0.00498099	0.999861	0.00288199
-43	0.00359232	1.00257	0.996636	0.00677921	0.996692	0.00291793
-42	0.00209872	1.00627	1.00216	0.00393327	0.997538	0.00053876
-41	0.00512457	1.00527	0.999001	0.00791893	0.994235	0.00479961
-40	0.0045107	1.005	0.998968	0.0060622	0.99477	0.00135183
-39	0.00451646	1.00677	0.998638	0.00816462	0.998116	0.00254143
-38	0.00397664	1.00015	1.00492	0.00750208	0.998388	0.00682604
-37	0.00556412	1.00764	1.00431	0.00661447	0.997401	0.00491
-36	0.00409348	1.00592	1.00205	0.00687306	0.995826	0.00165409
-35	0.00529771	1.00332	0.998112	0.00677999	0.990053	0.00468846
-34	0.00953498	1.00663	1.00079	0.00676184	0.999118	0.00363544
-33	0.00178782	1.00702	1.00988	0.00628689	0.995664	0.00449651
-32	0.0069614	1.00462	1.00584	0.00890186	0.995443	0.0053283
-31	0.00261432	1.00595	1.0056	0.007658	0.995145	0.00511154
-30	0.0059081	1.00684	0.998199	0.00459688	0.992744	0.00395987
-29	0.00617054	1.00854	1.00372	0.00397572	0.996074	0.00238171
-28	0.00685197	1.00893	1.00644	0.00600631	0.995463	0.00459751
-27	0.00429168	1.00858	0.999734	0.00554039	0.992839	0.00221513
-26	0.00215262	1.00871	1.00263	0.00292559	0.997935	0.00471203
-25	0.002906	1.00898	1.00168	0.00489613	0.994881	0.00698176
-24	0.00161378	1.00849	0.999436	0.00359697	0.996959	0.00309408
-23	0.00481783	1.00605	1.00452	0.00581584	0.994322	0.00253617
-22	0.00561025	1.00829	1.00049	0.0058378	0.993011	0.00230598
-21	0.00657866	1.00918	0.998961	0.00391652	0.992424	0.00109298
-20	0.00522959	1.00508	0.998182	0.00347943	0.992683	0.00100067
-19	0.00488758	0.996964	0.997742	0.00488415	0.993321	0.004315
-18	0.00472573	1.00292	0.999263	0.00532446	0.999702	0.00117976
-17	0.00358749	1.00722	0.998824	0.00487607	0.99982	0.00111367
-16	0.00466177	1.00829	0.994504	0.00298453	0.997544	0.00449594
-15	0.00329135	1.00812	0.998749	0.00509272	1.00187	0.00656328
-14	0.00412946	1.00654	0.997873	0.00618368	1.00285	0.00471036
-13	0.00415316	1.00758	0.998567	0.00355656	1.00369	0.00607758
-12	0.00248435	1.00882	0.996857	0.00249499	1.00374	0.00469591
-11	0.000764351	1.00316	0.999675	0.00453141	1.003	0.00322593
-10	0.00182093	1.00358	1.00041	0.00367574	0.998482	0.00426545
-9	0.00405936	1.00359	1.00162	0.00402877	1.00271	0.00570973
-8	0.0029242	1.00323	0.996238	0.000646477	0.999026	0.00236546
-7	0.00198833	1.00117	0.997739	0.00219666	0.999783	0.00382315
-6	0.00178751	0.99585	1.00119	0.00141235	1.00496	0.000591587
-5	0.00111943	1.00421	1.00166	0.00145805	0.999305	0.00284548
-4	0.00147787	0.998297	0.998403	0.00109001	1.00188	0.0032196
-3	0.00136154	0.999026	0.997281	0.00152308	0.997943	0.000978324
-2	0.00134457	1.00144	1.00373	0.0017714	0.996124	0.00273903
-1
0
1	0.490825	32.0056	1.62841	0.0651129	1.13741	0.00616993
2	0.329862	40.3886	1.87369	0.072876	1.12749	0.00926493
3	0.268846	47.1918	2.13624	0.0650104	1.15308	0.0167655
4	0.394117	52.2324	2.35632	0.058263	1.19169	0.0205883
5	0.606418	55.4429	2.55834	0.042509	1.24181	0.0238046
6	0.846096	56.9311	2.72095	0.0344245	1.28655	0.0266703
7	1.05194	56.9615	2.83366	0.0376081	1.32589	0.0270145
8	1.23747	55.8858	2.89581	0.0547563	1.35163	0.0257729
9	1.41207	53.9168	2.90473	0.0691871	1.36422	0.0240297
10	1.52976	51.3706	2.87061	0.0978227	1.3716	0.0260751
11	1.6507	48.3433	2.80723	0.106262	1.38104	0.026161
12	1.67978	45.1101	2.71798	0.109065	1.36519	0.0195657
13	1.70402	41.8405	2.59246	0.115083	1.35153	0.0222242
14	1.7272	38.5608	2.46323	0.110879	1.32443	0.0201218
15	1.73051	35.3521	2.34798	0.114114	1.29992	0.0218294
16	1.69266	32.295	2.21309	0.116695	1.27431	0.0189082
17	1.63333	29.4093	2.08558	0.110877	1.25227	0.0173989
18	1.57283	26.7109	1.96366	0.107444	1.22589	0.0132733
19	1.49222	24.2005	1.85078	0.0987915	1.19611	0.012336
20	1.41373	21.9038	1.7532	0.0970916	1.17947	0.0100412
21	1.34067	19.7825	1.66044	0.082158	1.15006	0.0127084
22	1.26345	17.8986	1.58345	0.0687416	1.13869	0.0124132
23	1.19237	16.1581	1.51298	0.0690526	1.11919	0.00976254
24	1.10119	14.5703	1.45102	0.0634732	1.09792	0.00667613
25	1.02439	13.1534	1.39562	0.0501994	1.08355	0.00499387
26	0.943106	11.8882	1.34355	0.0442383	1.07319	0.00729572
27	0.888727	10.7701	1.30842	0.0390717	1.06249	0.00741526
28	0.800746	9.74335	1.26886	0.0340838	1.05554	0.00807826
29	0.743833	8.83708	1.23802	0.0318396	1.0436	0.00501446
30	0.67504	8.00556	1.21211	0.025851	1.03699	0.00791949
31	0.617831	7.27742	1.18718	0.0280649	1.02859	0.00798275
32	0.568042	6.63966	1.16396	0.0235524	1.02199	0.00568812
33	0.509786	6.05959	1.14197	0.0196822	1.02243	0.0066521
34	0.469228	5.55122	1.12782	0.0155327	1.02045	0.00528068
35	0.43173	5.11524	1.11639	0.0140884	1.011	0.00343485
36	0.386733	4.6896	1.1007	0.0170771	1.00917	0.00535184
37	0.354733	4.34292	1.08701	0.0161542	1.00282	0.00523504
38	0.309556	4.01766	1.08058	0.0100245	1.00009	0.00586444
39	0.279236	3.73317	1.07319	0.00778245	0.997378	0.00604462
40	0.261581	3.48366	1.0651	0.00705681	0.995359	0.00456874
41	0.23392	3.25308	1.06411	0.00349629	0.997064	0.00711202
42	0.21001	3.05983	1.05701	0.00457916	0.994506	0.00522464
43	0.188064	2.88769	1.05627	0.00492068	0.998619	0.00734986
44	0.173706	2.724	1.04823	0.00339401	0.98797	0.00479393
45	0.153965	2.58709	1.04106	0.00627385	0.995889	0.007853
46	0.134019	2.45711	1.04161	0.00767009	0.989616	0.00688766
47	0.129835	2.34505	1.03998	0.00798942	0.988876	0.00671381
48	0.113229	2.24555	1.0329	0.00463115	0.985736	0.00936753
49	0.0987818	2.15011	1.03367	0.00703754	0.986318	0.00637561
50	0.0924298	2.07171	1.03071	0.0105458	0.985122	0.00738328
51	0.0854286	1.99725	1.02831	0.00779925	0.983255	0.004886
52	0.0751941	1.93033	1.01958	0.00885655	0.984248	0.00421576
53	0.0718621	1.87371	1.02234	0.00689787	0.986306	0.00573361
54	0.0665217	1.81834	1.01929	0.00789056	0.982509	0.00782087
55	0.0565736	1.76914	1.01433	0.00416004	0.979755	0.00683194
56	0.0551674	1.72603	1.01911	0.00518391	0.984339	0.0070128
57	0.0525029	1.67958	1.01331	0.00639233	0.982876	0.00906289
58	0.0487005	1.65263	1.01455	0.00463622	0.983177	0.00786811
59	0.0466804	1.61024	1.01319	0.00407812	0.981169	0.00498699
60	0.039957	1.58283	1.00472	0.00522276	0.982956	0.00653785
61	0.0379506	1.54963	1.00614	0.00448003	0.983847	0.00742082
62	0.0313484	1.52345	1.00436	0.00723127	0.981292	0.00840941
63	0.0351264	1.49774	1.00717	0.00434295	0.983564	0.00570256
64	0.0316546	1.47981	1.00193	0.0014231	0.982138	0.00795104
65	0.025623	1.45525	1.00056	0.00224676	0.979804	0.00825032
66	0.0251439	1.44026	0.997175	0.00435217	0.979191	0.00500688
67	0.0239627	1.42567	1.00142	0.00160323	0.979631	0.00602997
68	0.0210465	1.40397	0.997521	0.00227406	0.981613	0.00817264
69	0.0218624	1.39079	0.995526	0.000589366	0.980457	0.00562972
70	0.022389	1.3748	0.994816	0.00572908	0.987082	0.0106289
71	0.0192967	1.36641	0.995268	0.00706061	0.983202	0.0115478
72	0.0159932	1.34824	0.993765	0.00549476	0.984294	0.00619391
73	0.0155092	1.34106	0.994047	0.005736	0.978381	0.00665236
74	0.0157869	1.32599	0.994225	0.00478097	0.977181	0.00682732
75	0.0135991	1.31222	0.992746	0.00249132	0.985433	0.00480796
76	0.0145937	1.30351	0.99287	0.00517512	0.979853	0.00263704
77	0.0145062	1.29688	0.991546	0.00364823	0.977388	0.00719994
78	0.0167162	1.2882	0.99237	0.00589572	0.977972	0.00558218
79	0.0105313	1.27833	0.996431	0.00426826	0.977938	0.00547845
80	0.0126018	1.26816	0.988402	0.00359179	0.978463	0.00771755
81	0.0123945	1.26298	0.992114	0.00480692	0.98008	0.00607092
82	0.0140565	1.24902	0.985894	0.00496721	0.974185	0.00154509
83	0.0133076	1.24169	0.990475	0.00396325	0.97419	0.00358369
84	0.0121273	1.23908	0.987698	0.0069476	0.972426	0.00539155
85	0.0138831	1.23248	0.987521	0.00169836	0.971828	0.00500361
86	0.012183	1.22071	0.990619	0.00531565	0.968677	0.00368171
87	0.0112181	1.21904	0.980811	0.00673874	0.969241	0.00274564
88	0.0101133	1.21477	0.987002	0.005245	0.968923	0.00596735
89	0.0129728	1.21199	0.984618	0.00414014	0.965697	0.00326991
90	0.00776496	1.20306	0.983441	0.00337918	0.968819	0.00291657
91	0.00620067	1.20313	0.98548	0.00424721	0.968877	0.00365015
92	0.0105954	1.19599	0.981434	0.00932181	0.961016	0.00344909
93	0.0119069	1.19275	0.985693	0.00372964	0.966119	0.00452388
94	0.0120464	1.18518	0.979262	0.00456167	0.966103	0.0048428
95	0.0128695	1.18083	0.983413	0.00503947	0.96566	0.00469018
96	0.0123893	1.18007	0.978862	0.00364622	0.966519	0.00605767
97	0.0106921	1.17231	0.980629	0.00380182	0.966569	0.00679708
98	0.0139127	1.16667	0.979569	0.00101583	0.968411	0.0044271
99	0.00740534	1.16143	0.980763	0.00242561	0.965851	0.00662685
100	0.0102543	1.15459	0.982187	0.00346924	0.965261	0.00272485
