# Supplementary material for: Coral anthozoan-specific opsins employ a novel chloride counterion for spectral tuning
Source: eLife. 2025 Sep 1;14:RP105451. doi: 10.7554/eLife.105451 (PMC12401545; doi:10.7554/eLife.105451)
Supplement: Figure 1—source data 2. [file elife-105451-fig1-data2.xlsx]

## Sheet: Sheet1
Time [s]	D_mean_FoldChangeLuminescence_Antho2a_WT	D_se_FoldChangeLuminescence_Antho2a_WT	D_mean_FoldChangeLuminescence_Antho2c_WT	D_se_FoldChangeLuminescence_Antho2c_WT	D_mean_FoldChangeLuminescence_Antho2e_WT	D_se_FoldChangeLuminescence_Antho2e_WT
-51	0.00587814	1.01031	0.996539	0.00590315	1.00398	0.0060569
-50	0.00579034	1.00901	1.00264	0.00113381	1.00046	0.00688854
-49	0.00628808	1.00742	1.00007	0.00110914	0.999227	0.00410047
-48	0.00622876	1.00644	0.996016	0.00216941	1.00238	0.00250051
-47	0.00642451	1.00329	0.999073	0.00549384	0.997513	0.00290722
-46	0.00434463	1.00338	0.999298	0.00102432	0.99886	0.00333039
-45	0.00591976	1.00428	1.00199	0.00280503	0.996674	0.00130905
-44	0.00574969	1.00214	1.00024	0.00498099	0.999861	0.00288199
-43	0.00359232	1.00257	0.996636	0.00677921	0.996692	0.00291793
-42	0.00209872	1.00627	1.00216	0.00393327	0.997538	0.00053876
-41	0.00512457	1.00527	0.999001	0.00791893	0.994235	0.00479961
-40	0.0045107	1.005	0.998968	0.0060622	0.99477	0.00135183
-39	0.00451646	1.00677	0.998638	0.00816462	0.998116	0.00254143
-38	0.00397664	1.00015	1.00492	0.00750208	0.998388	0.00682604
-37	0.00556412	1.00764	1.00431	0.00661447	0.997401	0.00491
-36	0.00409348	1.00592	1.00205	0.00687306	0.995826	0.00165409
-35	0.00529771	1.00332	0.998112	0.00677999	0.990053	0.00468846
-34	0.00953498	1.00663	1.00079	0.00676184	0.999118	0.00363544
-33	0.00178782	1.00702	1.00988	0.00628689	0.995664	0.00449651
-32	0.0069614	1.00462	1.00584	0.00890186	0.995443	0.0053283
-31	0.00261432	1.00595	1.0056	0.007658	0.995145	0.00511154
-30	0.0059081	1.00684	0.998199	0.00459688	0.992744	0.00395987
-29	0.00617054	1.00854	1.00372	0.00397572	0.996074	0.00238171
-28	0.00685197	1.00893	1.00644	0.00600631	0.995463	0.00459751
-27	0.00429168	1.00858	0.999734	0.00554039	0.992839	0.00221513
-26	0.00215262	1.00871	1.00263	0.00292559	0.997935	0.00471203
-25	0.002906	1.00898	1.00168	0.00489613	0.994881	0.00698176
-24	0.00161378	1.00849	0.999436	0.00359697	0.996959	0.00309408
-23	0.00481783	1.00605	1.00452	0.00581584	0.994322	0.00253617
-22	0.00561025	1.00829	1.00049	0.0058378	0.993011	0.00230598
-21	0.00657866	1.00918	0.998961	0.00391652	0.992424	0.00109298
-20	0.00522959	1.00508	0.998182	0.00347943	0.992683	0.00100067
-19	0.00488758	0.996964	0.997742	0.00488415	0.993321	0.004315
-18	0.00472573	1.00292	0.999263	0.00532446	0.999702	0.00117976
-17	0.00358749	1.00722	0.998824	0.00487607	0.99982	0.00111367
-16	0.00466177	1.00829	0.994504	0.00298453	0.997544	0.00449594
-15	0.00329135	1.00812	0.998749	0.00509272	1.00187	0.00656328
-14	0.00412946	1.00654	0.997873	0.00618368	1.00285	0.00471036
-13	0.00415316	1.00758	0.998567	0.00355656	1.00369	0.00607758
-12	0.00248435	1.00882	0.996857	0.00249499	1.00374	0.00469591
-11	0.000764351	1.00316	0.999675	0.00453141	1.003	0.00322593
-10	0.00182093	1.00358	1.00041	0.00367574	0.998482	0.00426545
-9	0.00405936	1.00359	1.00162	0.00402877	1.00271	0.00570973
-8	0.0029242	1.00323	0.996238	0.000646477	0.999026	0.00236546
-7	0.00198833	1.00117	0.997739	0.00219666	0.999783	0.00382315
-6	0.00178751	0.99585	1.00119	0.00141235	1.00496	0.000591587
-5	0.00111943	1.00421	1.00166	0.00145805	0.999305	0.00284548
-4	0.00147787	0.998297	0.998403	0.00109001	1.00188	0.0032196
-3	0.00136154	0.999026	0.997281	0.00152308	0.997943	0.000978324
-2	0.00134457	1.00144	1.00373	0.0017714	0.996124	0.00273903
-1
0
1	0.490825	32.0056	1.62841	0.0651129	1.13741	0.00616993
2	0.329862	40.3886	1.87369	0.072876	1.12749	0.00926493
3	0.268846	47.1918	2.13624	0.0650104	1.15308	0.0167655
4	0.394117	52.2324	2.35632	0.058263	1.19169	0.0205883
5	0.606418	55.4429	2.55834	0.042509	1.24181	0.0238046
6	0.846096	56.9311	2.72095	0.0344245	1.28655	0.0266703
7	1.05194	56.9615	2.83366	0.0376081	1.32589	0.0270145
8	1.23747	55.8858	2.89581	0.0547563	1.35163	0.0257729
9	1.41207	53.9168	2.90473	0.0691871	1.36422	0.0240297
10	1.52976	51.3706	2.87061	0.0978227	1.3716	0.0260751
11	1.6507	48.3433	2.80723	0.106262	1.38104	0.026161
12	1.67978	45.1101	2.71798	0.109065	1.36519	0.0195657
13	1.70402	41.8405	2.59246	0.115083	1.35153	0.0222242
14	1.7272	38.5608	2.46323	0.110879	1.32443	0.0201218
15	1.73051	35.3521	2.34798	0.114114	1.29992	0.0218294
16	1.69266	32.295	2.21309	0.116695	1.27431	0.0189082
17	1.63333	29.4093	2.08558	0.110877	1.25227	0.0173989
18	1.57283	26.7109	1.96366	0.107444	1.22589	0.0132733
19	1.49222	24.2005	1.85078	0.0987915	1.19611	0.012336
20	1.41373	21.9038	1.7532	0.0970916	1.17947	0.0100412
21	1.34067	19.7825	1.66044	0.082158	1.15006	0.0127084
22	1.26345	17.8986	1.58345	0.0687416	1.13869	0.0124132
23	1.19237	16.1581	1.51298	0.0690526	1.11919	0.00976254
24	1.10119	14.5703	1.45102	0.0634732	1.09792	0.00667613
25	1.02439	13.1534	1.39562	0.0501994	1.08355	0.00499387
26	0.943106	11.8882	1.34355	0.0442383	1.07319	0.00729572
27	0.888727	10.7701	1.30842	0.0390717	1.06249	0.00741526
28	0.800746	9.74335	1.26886	0.0340838	1.05554	0.00807826
29	0.743833	8.83708	1.23802	0.0318396	1.0436	0.00501446
30	0.67504	8.00556	1.21211	0.025851	1.03699	0.00791949
31	0.617831	7.27742	1.18718	0.0280649	1.02859	0.00798275
32	0.568042	6.63966	1.16396	0.0235524	1.02199	0.00568812
33	0.509786	6.05959	1.14197	0.0196822	1.02243	0.0066521
34	0.469228	5.55122	1.12782	0.0155327	1.02045	0.00528068
35	0.43173	5.11524	1.11639	0.0140884	1.011	0.00343485
36	0.386733	4.6896	1.1007	0.0170771	1.00917	0.00535184
37	0.354733	4.34292	1.08701	0.0161542	1.00282	0.00523504
38	0.309556	4.01766	1.08058	0.0100245	1.00009	0.00586444
39	0.279236	3.73317	1.07319	0.00778245	0.997378	0.00604462
40	0.261581	3.48366	1.0651	0.00705681	0.995359	0.00456874
41	0.23392	3.25308	1.06411	0.00349629	0.997064	0.00711202
42	0.21001	3.05983	1.05701	0.00457916	0.994506	0.00522464
43	0.188064	2.88769	1.05627	0.00492068	0.998619	0.00734986
44	0.173706	2.724	1.04823	0.00339401	0.98797	0.00479393
45	0.153965	2.58709	1.04106	0.00627385	0.995889	0.007853
46	0.134019	2.45711	1.04161	0.00767009	0.989616	0.00688766
47	0.129835	2.34505	1.03998	0.00798942	0.988876	0.00671381
48	0.113229	2.24555	1.0329	0.00463115	0.985736	0.00936753
49	0.0987818	2.15011	1.03367	0.00703754	0.986318	0.00637561
50	0.0924298	2.07171	1.03071	0.0105458	0.985122	0.00738328
51	0.0854286	1.99725	1.02831	0.00779925	0.983255	0.004886
52	0.0751941	1.93033	1.01958	0.00885655	0.984248	0.00421576
53	0.0718621	1.87371	1.02234	0.00689787	0.986306	0.00573361
54	0.0665217	1.81834	1.01929	0.00789056	0.982509	0.00782087
55	0.0565736	1.76914	1.01433	0.00416004	0.979755	0.00683194
56	0.0551674	1.72603	1.01911	0.00518391	0.984339	0.0070128
57	0.0525029	1.67958	1.01331	0.00639233	0.982876	0.00906289
58	0.0487005	1.65263	1.01455	0.00463622	0.983177	0.00786811
59	0.0466804	1.61024	1.01319	0.00407812	0.981169	0.00498699
60	0.039957	1.58283	1.00472	0.00522276	0.982956	0.00653785
61	0.0379506	1.54963	1.00614	0.00448003	0.983847	0.00742082
62	0.0313484	1.52345	1.00436	0.00723127	0.981292	0.00840941
63	0.0351264	1.49774	1.00717	0.00434295	0.983564	0.00570256
64	0.0316546	1.47981	1.00193	0.0014231	0.982138	0.00795104
65	0.025623	1.45525	1.00056	0.00224676	0.979804	0.00825032
66	0.0251439	1.44026	0.997175	0.00435217	0.979191	0.00500688
67	0.0239627	1.42567	1.00142	0.00160323	0.979631	0.00602997
68	0.0210465	1.40397	0.997521	0.00227406	0.981613	0.00817264
69	0.0218624	1.39079	0.995526	0.000589366	0.980457	0.00562972
70	0.022389	1.3748	0.994816	0.00572908	0.987082	0.0106289
71	0.0192967	1.36641	0.995268	0.00706061	0.983202	0.0115478
72	0.0159932	1.34824	0.993765	0.00549476	0.984294	0.00619391
73	0.0155092	1.34106	0.994047	0.005736	0.978381	0.00665236
74	0.0157869	1.32599	0.994225	0.00478097	0.977181	0.00682732
75	0.0135991	1.31222	0.992746	0.00249132	0.985433	0.00480796
76	0.0145937	1.30351	0.99287	0.00517512	0.979853	0.00263704
77	0.0145062	1.29688	0.991546	0.00364823	0.977388	0.00719994
78	0.0167162	1.2882	0.99237	0.00589572	0.977972	0.00558218
79	0.0105313	1.27833	0.996431	0.00426826	0.977938	0.00547845
80	0.0126018	1.26816	0.988402	0.00359179	0.978463	0.00771755
81	0.0123945	1.26298	0.992114	0.00480692	0.98008	0.00607092
82	0.0140565	1.24902	0.985894	0.00496721	0.974185	0.00154509
83	0.0133076	1.24169	0.990475	0.00396325	0.97419	0.00358369
84	0.0121273	1.23908	0.987698	0.0069476	0.972426	0.00539155
85	0.0138831	1.23248	0.987521	0.00169836	0.971828	0.00500361
86	0.012183	1.22071	0.990619	0.00531565	0.968677	0.00368171
87	0.0112181	1.21904	0.980811	0.00673874	0.969241	0.00274564
88	0.0101133	1.21477	0.987002	0.005245	0.968923	0.00596735
89	0.0129728	1.21199	0.984618	0.00414014	0.965697	0.00326991
90	0.00776496	1.20306	0.983441	0.00337918	0.968819	0.00291657
91	0.00620067	1.20313	0.98548	0.00424721	0.968877	0.00365015
92	0.0105954	1.19599	0.981434	0.00932181	0.961016	0.00344909
93	0.0119069	1.19275	0.985693	0.00372964	0.966119	0.00452388
94	0.0120464	1.18518	0.979262	0.00456167	0.966103	0.0048428
95	0.0128695	1.18083	0.983413	0.00503947	0.96566	0.00469018
96	0.0123893	1.18007	0.978862	0.00364622	0.966519	0.00605767
97	0.0106921	1.17231	0.980629	0.00380182	0.966569	0.00679708
98	0.0139127	1.16667	0.979569	0.00101583	0.968411	0.0044271
99	0.00740534	1.16143	0.980763	0.00242561	0.965851	0.00662685
100	0.0102543	1.15459	0.982187	0.00346924	0.965261	0.00272485
