# Supplementary material for: Coral anthozoan-specific opsins employ a novel chloride counterion for spectral tuning
Source: eLife. 2025 Sep 1;14:RP105451. doi: 10.7554/eLife.105451 (PMC12401545; doi:10.7554/eLife.105451)
Supplement: Figure 2—figure supplement 1—source data 1. [file elife-105451-fig2-figsupp1-data1.xlsx]

## Sheet: Sheet1
wavelength [nm]	A_curve1_Antho2a_WT_dark_140Cl	A_curve2_Antho2a_WT_O56_140Cl_01	A_curve3_Antho2a_WT_O56_140Cl_02	A_curve4_Antho2a_WT_BP420_140Cl		time [min]	B_HPLC_Antho2a_WT_dark	B_HPLC_Antho2a_WT_irr_4m		wavelength [nm]	C_curve1_diff_abs_Antho2a_WT_BP500_2m_dark	C_curve2_diff_abs_Antho2a_WT_BP420_2m_BP500_dark	C_curve3_diff_abs_Antho2a_WT_BP500_2m_BP420_2m		wavelength [nm]	D_abs_Antho2a_WT_dark	D_abs_Antho2a_WT_10m_after_irr	D_abs_Antho2a_WT_20m_after_irr	D_abs_Antho2a_WT_40m_after_irr	D_abs_Antho2a_WT_80m_after_irr	D_abs_Antho2a_WT_160m_after_irr	D_abs_Antho2a_WT_420m_after_irr	D_abs_Antho2a_WT_1200m_after_irr	E_diff_abs_Antho2a_WT_10m_after_irr	E_diff_abs_Antho2a_WT_20m_after_irr	E_diff_abs_Antho2a_WT_40m_after_irr	E_diff_abs_Antho2a_WT_80m_after_irr	E_diff_abs_Antho2a_WT_160m_after_irr	E_diff_abs_Antho2a_WT_420m_after_irr	E_diff_abs_Antho2a_WT_1200m_after_irr	F_curve1_Antho2a_WT_dark	F_curve2_Antho2a_WT_dark_overnight	F_curve3_Antho2a_WT_dark_overnight_pH1	G_curve1_Antho2a_WT_O56_2m_overnight	G_curve1_Antho2a_WT_O56_2m_overnight_pH1	H_Antho2a_WT_dark_pH8_5	H_Antho2a_WT_pH8_5_P56_4m_Incubate0m	H_Antho2a_WT_pH8_5_P56_4m_Incubate10m	H_Antho2a_WT_pH8_5_P56_4m_Incubate30m
750	-4.8553e-05	-0.000954977	-0.000535582	-0.000346084		0.0166667	-97.2	-10.8		750	-0.000167824	-0.000126361	-0.000100432		750	1.46433e-05	-0.00051998	-0.00013822	-0.000431789	-0.000304594	-0.000232679	-0.000403999	-0.000281153	-0.000534623	-0.000152863	-0.000446432	-0.000319237	-0.000247322	-0.000418642	-0.000295796	-0.000612797	-0.000401149	3.62631e-05	-0.000281153	-0.000540095	5.63148e-05	0.000703054	0.000440865	-0.000262934
749	-7.24923e-05	-0.000906866	-0.000607035	-0.000316683		0.0333333	-99	-12.2		749	-0.000171224	-0.000217295	-0.000122264		749	0.000185427	-0.000428332	-5.8134e-05	-0.000277577	-0.000275807	-0.000129113	-0.00037149	-0.00013195	-0.000613759	-0.000243561	-0.000463004	-0.000461234	-0.00031454	-0.000556917	-0.000317377	-0.000505904	-0.000208726	0.000223262	-0.00013195	-0.000539165	0.000172295	0.000624077	0.000479195	-0.000177562
748	-4.20988e-05	-0.000673143	-0.000604184	-0.000124042		0.05	-95.2	-5.8		748	-0.000198555	-0.000221662	-0.000210731		748	0.000251237	-0.000366145	-0.000139408	-0.000287338	-0.000264858	-0.000178154	-0.000327458	-5.13965e-06	-0.000617382	-0.000390645	-0.000538575	-0.000516095	-0.000429391	-0.000578695	-0.000256377	-0.000557658	-0.000367056	0.000318652	-5.13965e-06	-0.000648651	0.000268774	0.000694006	0.000555123	-5.90472e-05
747	7.01023e-05	-0.000777561	-0.00045415	-0.000178744		0.0666667	-92.2	-4.2		747	-0.000159891	-0.000211395	-0.000198997		747	0.000204909	-0.00041774	-6.57961e-05	-0.000317749	-0.000364841	-0.000176491	-0.000275783	-0.000130703	-0.000622649	-0.000270705	-0.000522658	-0.00056975	-0.0003814	-0.000480692	-0.000335612	-0.00055746	-0.000479037	0.000123496	-0.000130703	-0.000565299	0.000124858	0.000688324	0.00054362	-6.49076e-05
746	0.00013595	-0.000634298	-0.0003056	-0.000124736		0.0833333	-88.4	-8.4		746	-0.000162891	-0.000166627	-0.000188964		746	0.000277391	-0.00023284	2.81685e-05	-0.000232258	-0.000244149	7.07352e-05	-0.000187976	2.05392e-05	-0.000510231	-0.000249223	-0.000509649	-0.00052154	-0.000206656	-0.000465367	-0.000256852	-0.000453458	-0.000275447	0.000158263	2.05392e-05	-0.000334328	8.69037e-05	0.000644391	0.00038038	-0.000127907
745	7.44959e-05	-0.000429204	-0.000284752	-0.000163658		0.1	-85.2	-11.6		745	-0.000187391	-0.000171196	-0.000132797		745	0.000285212	-0.000216803	8.96375e-06	-0.000220953	-0.000270738	6.33107e-05	-0.000278159	-2.38692e-05	-0.000502015	-0.000276248	-0.000506165	-0.00055595	-0.000221901	-0.000563371	-0.000309081	-0.000463436	-0.000422333	0.000194534	-2.38692e-05	-0.000386022	-1.02218e-06	0.000621405	0.000369728	-0.000321657
744	-7.01726e-06	-8.108e-05	-2.54301e-05	-0.000269284		0.116667	-84.6	-13		744	-0.000160057	-0.000171861	-0.000154796		744	0.000349221	-0.000276041	5.13725e-05	-0.000275677	-0.000222132	-5.21749e-05	-0.000192094	-3.23628e-05	-0.000625262	-0.000297848	-0.000624898	-0.000571353	-0.000401396	-0.000541315	-0.000381584	-0.000541978	-0.000362581	0.000176933	-3.23628e-05	-0.000374222	-2.27808e-05	0.000591924	0.000312213	-0.000385686
743	3.73327e-05	-0.000156338	0.00013304	-0.000371764		0.133333	-86.4	-14.4		743	-0.000149724	-0.000167561	-0.000161663		743	0.000327106	-0.000343653	2.00114e-05	-0.000255462	-0.000152718	4.25127e-06	-0.000155486	-5.40622e-05	-0.000670759	-0.000307095	-0.000582568	-0.000479824	-0.000322855	-0.000482592	-0.000381168	-0.000602997	-0.000161308	0.00014478	-5.40622e-05	-0.000270219	2.02812e-05	0.00065132	0.000348465	-0.000195361
742	-0.000163882	-0.000386914	-0.00017285	-0.000292012		0.15	-84.2	-15.8		742	-0.000179323	-0.000144362	-0.000105499		742	0.000384443	-0.000250204	0.000146307	-0.000181851	-0.000165271	0.000109739	-0.000126857	-3.23232e-05	-0.000634647	-0.000238136	-0.000566294	-0.000549714	-0.000274704	-0.0005113	-0.000416766	-0.000461357	-0.000186412	0.000276738	-3.23232e-05	-0.000246223	0.000134955	0.000572007	0.000389428	-0.00014428
741	-0.000118423	-0.000466386	-0.000604897	-0.000195634		0.166667	-88.6	-11.6		741	-0.000120958	-0.000235561	-0.000112297		741	0.000494642	-0.000142855	0.000240212	-0.000106794	-0.000129593	0.000104116	-0.0001128	9.82887e-05	-0.000637497	-0.00025443	-0.000601436	-0.000624235	-0.000390526	-0.000607442	-0.000396353	-0.000274933	-0.000185482	0.000469042	9.82887e-05	-0.000276555	0.00016493	0.000551416	0.000385389	-0.000177681
740	0.000141553	-0.00049151	-0.000547342	0.00011875		0.183333	-94.4	-4.2		740	-0.000158958	-0.000204693	-7.07982e-05		740	0.000264582	-0.000325735	5.99651e-05	-0.000246078	-0.00021158	-0.000103849	-0.000391328	-0.00025888	-0.000590317	-0.000204617	-0.00051066	-0.000476162	-0.000368431	-0.00065591	-0.000523462	-0.000482819	-0.000151329	0.000257573	-0.00025888	-0.000482758	0.000128402	0.000604199	0.000319717	-0.000191461
739	8.81563e-05	-0.000485749	-0.000302987	-9.26835e-06		0.2	-97	-3.6		739	-0.000143624	-0.000260728	-0.000165798		739	0.000285133	-0.000282614	0.000265297	-0.000223131	-7.42363e-05	-9.88496e-06	-0.000322587	-7.59001e-05	-0.000567747	-1.9836e-05	-0.000508264	-0.000359369	-0.000295018	-0.00060772	-0.000361033	-0.000542274	-0.000112742	0.000344707	-7.59001e-05	-0.000453931	0.000171009	0.000653914	0.000509388	-0.00014432
738	-0.000113851	-0.000536354	-0.000360423	-0.000124836		0.216667	-104	-2.6		738	-0.000188624	-0.000215561	-0.000234999		738	0.000262681	-0.000393071	0.00017654	-0.00028415	-0.000195998	-0.000114481	-0.000270853	-0.000207066	-0.000655752	-8.6141e-05	-0.000546831	-0.000458679	-0.000377162	-0.000533534	-0.000469747	-0.000556985	-0.000208567	0.000248822	-0.000207066	-0.000498815	0.000150774	0.000566146	0.000558489	-0.000166455
737	5.53874e-05	-0.000265864	-0.000298829	-0.000157956		0.233333	-102.8	-4.8		737	-0.000203325	-0.000171263	-0.000148797		737	0.000180675	-0.000480145	-6.04504e-05	-0.000339686	-0.000439997	-0.000232521	-0.000412493	-0.000511907	-0.00066082	-0.000241125	-0.000520361	-0.000620672	-0.000413196	-0.000593168	-0.000692582	-0.00072862	-0.00037058	0.000229399	-0.000511907	-0.000637663	0.00013252	0.00056577	0.000590642	-0.000175028
736	0.000224965	6.949e-05	-0.000274952	3.23667e-05		0.25	-100.6	-10		736	-0.000181224	-0.000148761	-0.000142365		736	0.000204414	-0.000344445	-9.61672e-05	-0.000182563	-0.000339915	-7.33001e-05	-0.000341396	-0.000345222	-0.000548859	-0.000300581	-0.000386977	-0.000544329	-0.000277714	-0.00054581	-0.000549636	-0.000654711	-0.000225574	0.000209699	-0.000345222	-0.000522039	0.000218486	0.000670169	0.000574209	-0.000165287
735	3.74136e-05	-0.000210626	-0.000376104	-0.000117292		0.266667	-97.8	-10.6		735	-0.000170223	-0.000127194	-0.00017543		735	0.000328136	-0.000360165	-8.89407e-05	-0.000217528	-0.000150085	6.82604e-05	-0.000199043	-0.000177131	-0.000688301	-0.000417077	-0.000545664	-0.000478221	-0.000259876	-0.000527179	-0.000505267	-0.000568785	-0.000224941	0.000151729	-0.000177131	-0.000322052	0.000226663	0.000678306	0.000519486	-9.60508e-05
734	5.16871e-05	-0.000218942	-0.00022993	-0.000187713		0.283333	-98.2	-13		734	-7.62902e-05	-0.000185261	-6.17979e-05		734	0.000203087	-0.000440726	-7.53984e-05	-0.000392726	-0.000391946	-7.94971e-05	-0.000275506	-0.000170181	-0.000643813	-0.000278485	-0.000595813	-0.000595033	-0.000282584	-0.000478593	-0.000373268	-0.000723591	-0.000436272	0.000201424	-0.000170181	-0.000557162	0.000342624	0.000590558	0.000551183	-0.000128956
733	0.000171194	-0.000214368	-0.0001055	-0.000164966		0.3	-96.2	-12		733	-0.000116623	-0.000162295	-9.42638e-05		733	0.000201266	-0.000473572	-6.82511e-05	-0.000328737	-0.000376107	-8.88223e-05	-0.000269507	-0.000234923	-0.000674838	-0.000269517	-0.000530003	-0.000577373	-0.000290088	-0.000470773	-0.000436189	-0.000609471	-0.000338031	6.22785e-05	-0.000234923	-0.000561121	0.00024953	0.000704915	0.00061541	-9.56352e-05
732	-5.69103e-05	-0.000478383	-0.0004709	-0.000122437		0.316667	-95.6	-11.8		732	-7.89227e-05	-0.000169162	-0.000127433		732	0.000236547	-0.000501568	2.9297e-05	-0.000299296	-0.000445046	-0.000256675	-0.000448566	-0.000230429	-0.000738115	-0.00020725	-0.000535843	-0.000681593	-0.000493222	-0.000685113	-0.000466976	-0.00064396	-0.000162436	-9.49626e-05	-0.000230429	-0.000546272	0.000253688	0.000817906	0.000548035	-2.80424e-05
731	2.51166e-05	-0.000566171	-0.000679736	-0.000239964		0.333333	-97.8	-10.4		731	-6.67236e-05	-0.000119661	-0.000128533		731	5.3904e-05	-0.000618221	-0.000139962	-0.000319729	-0.000445857	-0.000306251	-0.000438093	-0.000256464	-0.000672125	-0.000193866	-0.000373633	-0.000499761	-0.000360155	-0.000491997	-0.000310368	-0.000688943	-0.000445062	-0.000119988	-0.000256464	-0.000573476	0.000248857	0.000747661	0.000478225	-1.92716e-05
730	-0.000117473	-0.000531127	-0.000596166	-0.000325237		0.35	-97.8	-12.4		730	-0.000182691	-0.000105529	-8.78315e-05		730	0.000288835	-0.000513744	-4.06121e-05	-0.000272727	-0.000268719	-0.000134755	-0.000325418	-0.000222153	-0.000802579	-0.000329447	-0.000561562	-0.000557554	-0.00042359	-0.000614253	-0.000510988	-0.000619093	-0.000480007	-1.38276e-05	-0.000222153	-0.000560488	4.32081e-05	0.0006887	0.000561241	-0.000100506
729	-0.000163108	-0.00071086	-0.000383469	1.447e-05		0.366667	-96.2	-15.8		729	-0.000196724	-0.000118828	-5.67315e-05		729	0.000417685	-0.000353256	2.29416e-05	-0.000248691	-0.000118249	-9.54153e-05	-0.00023278	-0.000116864	-0.000770941	-0.000394743	-0.000666376	-0.000535934	-0.0005131	-0.000650465	-0.000534549	-0.000483215	-0.000315797	0.000226845	-0.000116864	-0.000439795	0.000175127	0.000816461	0.000463455	-2.24395e-05
728	-0.000117811	-0.000695179	-0.00033512	-0.000230719		0.383333	-95.4	-19.2		728	-4.89229e-05	-0.000162497	-6.29316e-05		728	0.000330591	-0.000428134	-7.97937e-05	-0.000418663	-0.000351101	-0.000145347	-0.000193143	-0.000108726	-0.000758725	-0.000410385	-0.000749254	-0.000681692	-0.000475938	-0.000523734	-0.000439317	-0.000569775	-0.000483274	0.000250307	-0.000108726	-0.000606738	0.000350741	0.000790881	0.000595453	0.000109677
727	-2.1091e-05	-0.000497925	-0.000480581	-4.86083e-05		0.4	-82.8	-21.8		727	-0.000118455	-0.000217429	-0.000126766		727	0.000183724	-0.000411642	-5.19766e-05	-0.000568242	-0.000440413	-0.000216484	-0.000204567	-0.000186436	-0.000595366	-0.000235701	-0.000751966	-0.000624137	-0.000400208	-0.000388291	-0.00037016	-0.000685993	-0.000534057	0.000251395	-0.000186436	-0.000651502	0.000291167	0.000544704	0.00056233	-7.27478e-05
726	-3.58417e-05	-0.000382518	-0.00039808	9.56627e-05		0.416667	-77	-17.8		726	-0.000140158	-0.000184894	-0.000115698		726	0.000248426	-0.000328903	1.32006e-05	-0.000485523	-0.000363356	-0.000252161	-0.000161149	-0.000109419	-0.000577329	-0.000235225	-0.000733949	-0.000611782	-0.000500587	-0.000409575	-0.000357845	-0.000645861	-0.000440845	8.85118e-05	-0.000109419	-0.000578386	0.00018853	0.000532627	0.000474028	-0.000181878
725	-0.000128682	-0.00044821	-0.000578466	-0.000233331		0.433333	-75.8	-14.4		725	-9.31223e-05	-0.000169163	-0.000133797		725	0.000194296	-0.00035674	-7.70417e-05	-0.00050643	-0.000340509	-0.000201081	-0.000373786	-0.000213996	-0.000551036	-0.000271338	-0.000700726	-0.000534805	-0.000395377	-0.000568082	-0.000408292	-0.000885366	-0.000582525	-5.69293e-05	-0.000213996	-0.000581197	0.000117532	0.000658943	0.000500677	-5.58398e-05
724	-5.02364e-05	-0.000708602	-0.000577634	-0.00042805		0.45	-80.4	-14.8		724	-0.000119624	-0.000181129	-6.22636e-05		724	0.000263057	-0.000275011	-4.80366e-05	-0.000359979	-0.000345696	-0.000138913	-0.000287246	-0.000226627	-0.000538068	-0.000311094	-0.000623036	-0.000608753	-0.00040197	-0.000550303	-0.000489684	-0.000711712	-0.000420809	1.88402e-05	-0.000226627	-0.000471295	0.000263825	0.000816362	0.000677242	0.000109539
723	-8.4786e-05	-0.000514556	-0.000288494	-0.000284253		0.466667	-87.8	-13.2		723	-0.000204691	-9.55946e-05	-7.82301e-05		723	0.000163312	-0.000409484	-0.000193695	-0.00046418	-0.000435127	-0.000262318	-0.000305243	-0.000199008	-0.000572796	-0.000357007	-0.000627492	-0.000598439	-0.00042563	-0.000468555	-0.00036232	-0.00066962	-0.000397011	8.97591e-05	-0.000199008	-0.000490361	0.000123155	0.000732455	0.000597374	-5.98985e-05
722	-5.45949e-05	-0.000482838	-0.000277981	-1.80602e-05		0.483333	-92.8	-13.2		722	-0.000107224	-0.000180329	-0.000148898		722	0.000276679	-0.00040204	-6.50041e-05	-0.000383401	-0.00039149	-0.00023852	-0.000333833	-0.000111142	-0.000678719	-0.000341683	-0.00066008	-0.000668169	-0.000515199	-0.000610512	-0.000387821	-0.000603294	-0.000384855	0.000200651	-0.000111142	-0.000565992	0.00014632	0.000695531	0.000596819	-0.000130085
721	0.000140385	-0.000501489	-0.000468405	-9.00674e-05		0.5	-88.2	-12.8		721	-5.78897e-05	-0.000279463	-9.02305e-05		721	0.000404895	-0.00038725	8.2991e-05	-0.000330341	-0.000268422	-0.000180866	-0.000174988	-2.34807e-06	-0.000792145	-0.000321904	-0.000735236	-0.000673317	-0.000585761	-0.000579883	-0.000407243	-0.000580149	-0.000341713	0.000277352	-2.34807e-06	-0.000483946	0.000219634	0.000700678	0.000583713	-7.37972e-05
720	0.000155054	-0.000709672	-0.00059676	-9.43639e-05		0.516667	-86.4	-12		720	-5.57241e-05	-0.00026383	-5.40642e-05		720	0.000297764	-0.000342327	0.000171352	-0.000321016	-0.000286359	-7.76361e-05	-0.00020528	-9.04324e-05	-0.000640091	-0.000126412	-0.00061878	-0.000584123	-0.0003754	-0.000503044	-0.000388196	-0.000583594	-0.000300235	0.00023518	-9.04324e-05	-0.000378518	0.000231493	0.000789594	0.000522297	-8.93788e-05
719	0.000119835	-0.000744893	-0.000719116	7.05777e-05		0.533333	-82.2	-10.8		719	-8.65235e-05	-0.000240662	-9.60308e-05		719	0.00024607	-0.000350682	5.07192e-05	-0.000417752	-0.000318255	-0.000102483	-0.000324468	-0.000249534	-0.000596752	-0.000195351	-0.000663822	-0.000564325	-0.000348553	-0.000570538	-0.000495604	-0.000556173	-0.000321024	0.000156144	-0.000249534	-0.000402118	0.000238621	0.000699431	0.000601809	-0.000125155
718	4.16687e-05	-0.000644574	-0.000564092	1.8666e-05		0.55	-76.4	-14.2		718	-1.64223e-05	-0.000253763	-0.000116997		718	0.000231894	-0.000308689	3.38903e-05	-0.000302741	-0.000264264	-5.85897e-05	-0.000415166	-0.000202592	-0.000540583	-0.000198004	-0.000534635	-0.000496158	-0.000290484	-0.00064706	-0.000434486	-0.000681538	-0.000363611	0.000153808	-0.000202592	-0.000331041	0.000353711	0.000848258	0.000693714	9.36204e-05
717	-0.000169564	-0.000652473	-0.000822227	-0.000233806		0.566667	-76.2	-16.8		717	-7.63237e-05	-0.000168594	-0.000107931		717	0.000238725	-0.000355513	-2.70501e-05	-0.000253938	-0.000283449	-4.81651e-06	-0.000362145	-0.000174121	-0.000594238	-0.000265775	-0.000492663	-0.000522174	-0.000243542	-0.00060087	-0.000412846	-0.000773879	-0.00037349	0.000236685	-0.000174121	-0.000351731	0.000221198	0.000610357	0.000563023	-3.06559e-05
716	-0.000125096	-0.000747982	-0.00067736	-0.000148552		0.583333	-84	-15.8		716	-6.15566e-05	-0.000202427	-0.000117131		716	0.000415943	-0.000382974	9.76223e-05	-0.000125306	-0.00025286	4.14926e-05	-0.000306313	-5.12309e-05	-0.000798917	-0.000318321	-0.000541249	-0.000668803	-0.00037445	-0.000722256	-0.000467174	-0.000544333	-0.000377074	0.000167192	-5.12309e-05	-0.000265488	7.83903e-05	0.000562107	0.000584307	-0.000220802
715	0.000179052	-0.000857865	-0.000649147	-0.000102996		0.6	-88	-14.2		715	-6.94903e-05	-0.000174628	-0.000113798		715	0.000246921	-0.000416532	-3.3346e-05	-0.000320204	-0.00039642	-2.90303e-05	-0.000476898	-0.000133455	-0.000663453	-0.000280267	-0.000567125	-0.000643341	-0.000275951	-0.000723819	-0.000380376	-0.000659562	-0.00046591	0.000120645	-0.000133455	-0.000375845	3.99809e-05	0.000635165	0.000525287	-0.000269923
714	0.000335876	-0.000635724	-0.000360067	8.588e-06		0.616667	-92	-11.2		714	-4.0623e-05	-0.000172662	-0.000107364		714	0.000214748	-0.00033706	-7.92592e-05	-0.000374729	-0.000368445	-0.000150713	-0.000303422	-0.000300714	-0.000551808	-0.000294007	-0.000589477	-0.000583193	-0.000365461	-0.00051817	-0.000515462	-0.000740241	-0.000451497	0.000168855	-0.000300714	-0.000534017	0.000207062	0.000638887	0.000467296	-0.000142578
713	0.000214867	-0.000292533	-1.337e-05	-7.30197e-05		0.633333	-92	-9.4		713	-5.00591e-05	-0.000107461	-6.47968e-05		713	0.000339262	-0.000284178	0.000136289	-0.000314522	-0.000313583	-0.000238698	-0.000132698	-0.000182912	-0.00062344	-0.000202973	-0.000653784	-0.000652845	-0.00057796	-0.00047196	-0.000522174	-0.000497965	-0.00043352	0.00024504	-0.000182912	-0.000453971	0.000261093	0.000745166	0.000481413	5.15993e-06
712	-3.29337e-05	-0.000428075	-8.06701e-05	-5.5222e-05		0.65	-89.4	-10.2		712	-0.00010679	-0.000105595	-5.57642e-05		712	0.000226746	-0.000272952	0.000134606	-0.000375046	-0.000261591	-0.000133983	-0.000286276	-0.000132742	-0.000499698	-9.214e-05	-0.000601792	-0.000488337	-0.000360729	-0.000513022	-0.000359488	-0.000576863	-0.000444904	0.00017028	-0.000132742	-0.000472206	0.000181086	0.000820223	0.000557915	-0.000103871
711	-6.98176e-05	-0.00034795	-6.475e-05	-0.000119866		0.666667	-89.4	-12.4		711	-0.000126024	-0.000169162	-0.000120866		711	0.000205502	-0.000476898	3.28212e-05	-0.000484177	-0.000368484	-0.000272811	-0.000438508	-0.000343261	-0.0006824	-0.000172681	-0.000689679	-0.000573986	-0.000478313	-0.00064401	-0.000548763	-0.000726442	-0.000539581	0.000156639	-0.000343261	-0.000531899	0.000264042	0.000699609	0.000639446	-1.25202e-05
710	1.5455e-05	-0.000528217	-0.000511051	-9.35514e-05		0.683333	-92.6	-11.6		710	-2.34904e-05	-0.000177161	-0.000154364		710	0.000281133	-0.000420175	0.000191488	-0.000306404	-0.000197344	-0.000159622	-0.000307877	-0.00027553	-0.000701308	-8.9645e-05	-0.000587537	-0.000478477	-0.000440755	-0.00058901	-0.000556663	-0.000633942	-0.000404119	0.000265294	-0.00027553	-0.000436726	0.000165663	0.000632551	0.000596285	-0.00011286
709	2.2283e-05	-0.000799419	-0.00038626	7.88196e-07		0.7	-95.4	-9		709	-1.14577e-05	-0.000211429	-0.000130431		709	0.000289112	-0.000290613	0.000154801	-0.000176683	-0.000215163	1.3517e-05	-0.000196588	-0.000152303	-0.000579725	-0.000134311	-0.000465795	-0.000504275	-0.000275595	-0.0004857	-0.000441415	-0.000486977	-0.000347138	0.000334055	-0.000152303	-0.000434707	0.000126105	0.0007281	0.000569636	-0.000136321
708	4.16801e-06	-0.000813258	-0.000512358	-0.000127507		0.716667	-90	-10.4		708	-0.000102092	-0.00014336	-0.000126931		708	0.000195682	-0.000388596	-7.49826e-05	-0.000323233	-0.000275589	-0.000182708	-0.000257588	-0.000218173	-0.000584278	-0.000270665	-0.000518915	-0.000471271	-0.00037839	-0.00045327	-0.000413855	-0.000619192	-0.00046698	0.00029127	-0.000218173	-0.000490737	0.000366283	0.000957289	0.000666827	2.28005e-05
707	2.17683e-05	-0.000407405	-0.000369154	-0.000139049		0.733333	-89.2	-12		707	-0.00012909	-0.000102129	-0.000146331		707	0.000275115	-0.000179483	-1.82198e-05	-0.000313928	-0.000124466	-0.000152752	-0.000258182	-1.05051e-05	-0.000454598	-0.000293335	-0.000589043	-0.000399581	-0.000427867	-0.000533297	-0.00028562	-0.000664353	-0.000505765	0.000290181	-1.05051e-05	-0.000294453	0.000306827	0.000756412	0.000550451	3.06126e-06
706	-1.7134e-05	-0.000594265	-0.000557024	-9.17697e-05		0.75	-91	-10.4		706	-6.0824e-05	-0.00011546	-0.000153464		706	0.000236547	-0.000211398	-0.000115808	-0.000192285	-0.000185346	-0.000169977	-0.000238601	-5.9487e-05	-0.000447945	-0.000352355	-0.000428832	-0.000421893	-0.000406524	-0.000475148	-0.000296034	-0.000649247	-0.000431144	0.000166657	-5.9487e-05	-0.000366441	0.000334664	0.000812561	0.000671579	7.48315e-05
705	7.25163e-05	-0.000526257	-0.000735509	1.39943e-05		0.766667	-90.2	-4.4		705	-8.01558e-05	-0.000120797	-0.000131231		705	0.000264998	-0.000360363	-0.000109472	-0.000301078	-0.000312117	-5.37192e-05	-0.000229949	-8.57797e-05	-0.000625361	-0.00037447	-0.000566076	-0.000577115	-0.000318717	-0.000494947	-0.000350778	-0.000661146	-0.000425957	0.00026771	-8.57797e-05	-0.000460109	0.000431381	0.000993442	0.000733074	0.000104094
704	0.000104882	-0.000708068	-0.000702425	-0.000107074		0.783333	-90.6	-2.2		704	-0.000107422	-0.000137996	-8.61315e-05		704	0.000339718	-0.000356641	0.000114827	-0.000250889	-0.000414714	6.53896e-05	-0.000199697	-5.36068e-05	-0.000696359	-0.000224891	-0.000590607	-0.000754432	-0.000274328	-0.000539415	-0.000393325	-0.000618282	-0.000369629	0.00013981	-5.36068e-05	-0.000510714	0.000326309	0.000895101	0.000614777	5.54881e-05
703	8.82326e-05	-0.000818248	-0.000640891	-0.000288826		0.8	-92.6	-4		703	-6.71905e-05	-0.000200327	-0.000134031		703	0.000401074	-0.000244244	0.00016965	-5.26842e-05	-0.000266046	7.22795e-05	-0.000142399	-5.30129e-05	-0.000645318	-0.000231424	-0.000453758	-0.00066712	-0.000328794	-0.000543473	-0.000454087	-0.000633903	-0.00024856	0.000140701	-5.30129e-05	-0.000516337	0.000175404	0.000753937	0.000565379	3.19079e-05
702	5.65167e-05	-0.0005082	-0.000659066	-0.00026782		0.816667	-89.8	-1.4		702	-8.92554e-05	-0.000149896	-0.000178632		702	0.000367297	-0.000311837	8.04766e-05	-0.000209589	-0.000218173	-6.28163e-06	-0.000195618	-0.000102391	-0.000679134	-0.00028682	-0.000576886	-0.00058547	-0.000373579	-0.000562915	-0.000469688	-0.000730164	-0.000388696	0.000156421	-0.000102391	-0.000484837	0.000110306	0.000677712	0.000475612	-0.000161901
701	-1.64016e-05	-0.00078362	-0.000451358	6.3314e-05		0.833333	-90.2	-3.4		701	-8.70898e-05	-0.000130027	-0.000137997		701	0.000276243	-0.00044037	-4.5542e-05	-0.000284289	-0.000319601	1.82094e-05	-0.000396951	-0.000234963	-0.000716613	-0.000321785	-0.000560532	-0.000595844	-0.000258034	-0.000673194	-0.000511206	-0.000821832	-0.000503706	0.000148482	-0.000234963	-0.000644375	5.40775e-05	0.000679652	0.000492817	-0.000203637
700	-0.000184631	-0.000828167	-0.000535404	-0.0001951		0.85	-90.4	-4.4		700	-8.13243e-05	-4.31612e-05	-0.000124832		700	0.000368822	-0.000225812	0.000151554	-6.23261e-05	-0.00028236	8.31886e-05	-0.000203953	6.21752e-07	-0.000594634	-0.000217268	-0.000431148	-0.000651182	-0.000285633	-0.000572775	-0.0003682	-0.000520931	-0.000388319	0.000228469	6.21752e-07	-0.000491549	2.26571e-05	0.000650786	0.000469019	-0.00017091
699	-0.000128126	-0.000811714	-0.000515506	-0.000411934		0.866667	-89.4	-5.8		699	-5.45891e-05	-0.000102863	-8.08627e-05		699	0.000449105	-0.000283168	0.000111422	-0.000158587	-0.000221915	0.000106888	-0.00025842	3.34876e-05	-0.000732273	-0.000337683	-0.000607692	-0.00067102	-0.000342217	-0.000707525	-0.000415617	-0.000558311	-0.000321538	0.000143453	3.34876e-05	-0.0004137	0.000136242	0.000682186	0.000624082	-0.000181462
698	-3.3903e-05	-0.000644395	-0.000283861	-0.000231192		0.883333	-94.2	-6.8		698	-7.69235e-05	-0.000147828	-5.83644e-05		698	0.000633213	-0.000189085	0.000228491	-0.000131384	-0.000149531	0.000135912	-0.000191223	6.71453e-05	-0.000822298	-0.000404722	-0.000764597	-0.000782744	-0.000497301	-0.000824436	-0.000566068	-0.000526455	-0.000260222	0.000210709	6.71453e-05	-0.00034393	0.000289603	0.000761243	0.00067643	-0.000133886
697	-5.44143e-05	-0.000628002	-0.000501013	-5.16774e-05		0.9	-96.8	-12.6		697	-1.70233e-05	-0.000147395	-6.96632e-05		697	0.000599338	-0.00017584	0.000373695	-0.000233426	-9.10454e-05	0.000116134	-0.000154754	2.26181e-05	-0.000775178	-0.000225643	-0.000832764	-0.000690383	-0.000483204	-0.000754092	-0.00057672	-0.000408653	-0.000216328	0.000271491	2.26181e-05	-0.000331991	0.000414671	0.000741662	0.000596285	-0.000106089
696	-0.000216906	-0.000288494	-0.000171603	-0.000219018		0.916667	-97.8	-14.2		696	-8.38898e-05	-0.000100062	-7.80973e-05		696	0.00052826	-0.000268933	0.000190458	-0.000276805	-0.00024403	7.1745e-05	-0.00028002	6.73433e-05	-0.000797193	-0.000337802	-0.000805065	-0.00077229	-0.000456515	-0.00080828	-0.000460917	-0.000458308	-0.000341971	0.000151234	6.73433e-05	-0.000378914	0.000299482	0.00070935	0.000515605	-0.000102723
695	-0.00010102	-0.00046597	-0.000154556	-0.000100224		0.933333	-96.6	-15.8		695	-4.4624e-05	-0.000119927	-7.84648e-05		695	0.000447106	-0.000350682	0.000123717	-0.000224022	-0.000231477	-2.94065e-05	-0.000250579	1.5154e-05	-0.000797788	-0.000323389	-0.000671128	-0.000678583	-0.000476513	-0.000697685	-0.000431952	-0.000406159	-0.00024369	0.000240546	1.5154e-05	-0.000367213	0.000299146	0.000785476	0.000500994	-0.000270061
694	-8.78543e-05	-0.000342129	-0.000613688	-7.0625e-05		0.95	-97.6	-17		694	-8.499e-05	-0.000120262	-6.4197e-05		694	0.000450016	-0.000327814	9.28706e-05	-0.000178406	-0.000247811	-4.04343e-05	-0.00017184	6.02158e-05	-0.00077783	-0.000357145	-0.000628422	-0.000697827	-0.00049045	-0.000621856	-0.0003898	-0.000505568	-0.000204607	0.000272204	6.02158e-05	-0.000261528	0.000334724	0.00091785	0.000515744	-0.000137767
693	-1.6005e-05	-0.000195599	-0.00034694	5.17297e-05		0.966667	-101	-16.6		693	-9.52246e-05	-0.00012306	-0.000122631		693	0.000544911	-0.00017091	8.54064e-05	-0.000167655	-0.000117774	0.000102037	-0.000114067	5.25933e-05	-0.000715821	-0.000459505	-0.000712566	-0.000662685	-0.000442874	-0.000658978	-0.000492318	-0.000488501	-0.000207161	0.000313009	5.25933e-05	-0.000287682	0.000390675	0.000979701	0.000679518	-0.000126145
692	-8.52199e-06	-0.0001065	-4.23e-05	7.82227e-05		0.983333	-101	-13.2		692	-7.30566e-05	-0.000114828	-0.000110563		692	0.00063157	-0.000101575	0.000192121	-7.23047e-05	-0.000122921	0.000196873	-4.85734e-05	0.000225634	-0.000733145	-0.000439449	-0.000703875	-0.000754491	-0.000434697	-0.000680143	-0.000405936	-0.000437836	-0.000237038	0.000522063	0.000225634	-0.000274852	0.000335951	0.000890271	0.000649088	-0.00013648
691	0.000108824	-0.000205696	-7.01e-05	4.47002e-06		1	-96	-10.6		691	-9.12919e-05	-0.00011046	-0.000111631		691	0.000492682	-0.000230801	0.000135378	-0.000188404	-0.000243574	7.66155e-05	-0.000163782	8.3202e-05	-0.000723483	-0.000357304	-0.000681086	-0.000736256	-0.000416066	-0.000656464	-0.00040948	-0.000528059	-0.000153923	0.000492563	8.3202e-05	-0.000211754	0.000433361	0.000979681	0.000790945	-1.26589e-05
690	9.34007e-05	-0.00035383	-0.000359532	3.85453e-05		1.01667	-93	-5.4		690	-0.000122824	-5.7429e-05	-5.10293e-05		690	0.000311346	-0.000311124	0.000123163	-0.000204778	-0.000151194	8.6495e-05	-0.000251688	1.10557e-05	-0.00062247	-0.000188183	-0.000516124	-0.00046254	-0.000224851	-0.000563034	-0.00030029	-0.000591553	-0.000247076	0.000309742	1.10557e-05	-0.00038228	0.000473612	0.00109818	0.000992318	0.000118389
689	0.00017703	-0.000408771	-0.000158892	0.000301829		1.03333	-90.4	-1.2		689	-0.000159924	-3.15941e-05	-2.19311e-05		689	0.000478289	-0.000322884	0.000119737	-0.000213073	-0.000135493	7.85557e-05	-0.000207121	-4.59447e-05	-0.000801173	-0.000358552	-0.000691362	-0.000613782	-0.000399733	-0.00068541	-0.000524234	-0.000659562	-0.000275012	0.000339044	-4.59447e-05	-0.000337179	0.000474799	0.00113639	0.000985408	5.56465e-05
688	0.000205583	-0.000484679	8e-05	0.000298936		1.05	-88.4	-5		688	-6.69571e-05	-0.000155728	-8.47978e-05		688	0.000446611	-0.000377766	0.000219483	-0.000114337	-7.32464e-05	0.000150623	-7.52422e-05	-2.66212e-05	-0.000824377	-0.000227128	-0.000560948	-0.000519857	-0.000295988	-0.000521853	-0.000473232	-0.000586564	-0.000248857	0.000467063	-2.66212e-05	-0.00020916	0.000557202	0.00121065	0.00108656	0.00015268
687	-7.51234e-05	-0.000489728	-0.000167445	3.514e-05		1.06667	-90.4	-9.6		687	-5.52919e-05	-9.34948e-05	-0.000125533		687	0.000283905	-0.000432094	0.000172144	-0.000243543	-8.70262e-05	0.000133655	-0.000170969	3.17255e-05	-0.000715999	-0.000111761	-0.000527448	-0.000370931	-0.00015025	-0.000454874	-0.00025218	-0.000723215	-0.000468623	0.000360565	3.17255e-05	-0.000408295	0.000570407	0.00126118	0.00105553	0.00033659
686	2.38754e-06	-0.000210983	-0.00011221	-0.000153464		1.08333	-87.2	-15.6		686	-6.52919e-05	-0.000120494	-8.51319e-05		686	0.000129614	-0.000317757	5.72131e-05	-0.000240118	-0.000164142	5.50745e-05	-0.000159585	-0.000121021	-0.000447371	-7.24009e-05	-0.000369732	-0.000293756	-7.45395e-05	-0.000289199	-0.000250635	-0.000810784	-0.000667283	0.000245733	-0.000121021	-0.000473136	0.000591651	0.00126807	0.00111059	0.000490544
685	5.61997e-05	-0.000184314	1.294e-05	-0.000165124		1.1	-83.8	-19.2		685	-0.000112124	-0.000162763	-8.54311e-05		685	0.000125377	-0.000371233	-5.13232e-05	-0.000224556	-0.00024104	9.63349e-05	-7.24506e-05	-0.000180477	-0.00049661	-0.0001767	-0.000349933	-0.000366417	-2.90421e-05	-0.000197828	-0.000305854	-0.00089578	-0.000666431	0.00029325	-0.000180477	-0.000476957	0.000711156	0.00141844	0.00112045	0.000633253
684	0.000151867	-0.00055542	-0.000294909	7.1589e-05		1.11667	-84.2	-18.6		684	-8.93225e-05	-0.000175728	-7.8599e-05		684	6.74265e-05	-0.000237592	-3.09365e-06	-0.000112199	-0.000225657	9.09893e-05	-0.000199657	-0.000275649	-0.000305019	-7.05202e-05	-0.000179625	-0.000293083	2.35628e-05	-0.000267084	-0.000343076	-0.000741845	-0.000531385	0.000216193	-0.000275649	-0.00051402	0.000652809	0.00127593	0.0010785	0.00056766
683	5.15677e-05	-0.000441499	-0.000298651	-0.000138773		1.13333	-85.8	-18.2		683	-7.73904e-05	-0.000155163	-3.21644e-05		683	-8.66666e-05	-0.00032821	-6.75581e-05	-0.000244533	-0.000323561	-3.56431e-05	-0.000430688	-0.000220153	-0.000241543	1.91085e-05	-0.000157866	-0.000236894	5.10235e-05	-0.000344021	-0.000133486	-0.000818011	-0.000437697	0.000167687	-0.000220153	-0.000519069	0.000411305	0.00113215	0.000979191	0.000383829
682	0.00012375	-0.0003568	-0.000293365	0.000112731		1.15	-88.2	-14.4		682	-0.000102659	-0.00012026	-4.85657e-05		682	-1.91729e-05	-0.000463039	-0.000112501	-0.000425295	-0.000363515	-4.77202e-05	-0.000497845	-0.000294695	-0.000443866	-9.33281e-05	-0.000406122	-0.000344342	-2.85473e-05	-0.000478672	-0.000275522	-0.000889325	-0.000463139	5.69131e-05	-0.000294695	-0.000644593	0.000531206	0.00122253	0.000985824	0.000453719
681	0.000222589	-0.000194233	-0.000307323	0.000156248		1.16667	-88.6	-17.6		681	-0.000112422	-8.00986e-05	-3.52639e-05		681	0.000238507	-0.000450962	4.98282e-05	-0.000193077	-8.8333e-05	0.000173926	-0.000240561	-0.000195227	-0.000689469	-0.000188679	-0.000431584	-0.00032684	-6.4581e-05	-0.000479068	-0.000433734	-0.000793995	-0.000473196	0.000222628	-0.000195227	-0.000482224	0.000554192	0.00131345	0.00102782	0.000422278
680	0.000135713	-0.000253985	-0.000374143	5.05823e-05		1.18333	-90.6	-21		680	-4.75893e-05	-0.000146228	-5.50626e-05		680	9.9342e-05	-0.000598165	-0.00020607	-0.000250869	-0.000206709	-0.000163325	-0.000299522	-0.000290518	-0.000697507	-0.000305412	-0.000350211	-0.000306051	-0.000262667	-0.000398864	-0.00038986	-0.000898096	-0.000680785	7.3841e-05	-0.000290518	-0.000603689	0.000653878	0.00127957	0.0010646	0.000493395
679	0.000152383	-0.000439776	-0.00022898	-3.80465e-06		1.2	-90.8	-20.2		679	-7.12896e-05	-0.000170929	-4.78007e-05		679	-2.05192e-05	-0.000626735	-0.000208366	-0.000471743	-0.000343419	-0.000388257	-0.000330071	-0.000493078	-0.000606216	-0.000187847	-0.000451224	-0.0003229	-0.000367738	-0.000309552	-0.000472559	-0.000948246	-0.000795024	-1.74705e-05	-0.000493078	-0.000659283	0.000456941	0.00123499	0.000962501	0.000401925
678	5.61624e-05	-0.000879366	-0.000411919	-9.88135e-06		1.21667	-87.4	-15.8		678	-0.000103692	-0.000106263	-0.00010033		678	6.29718e-05	-0.000585059	-9.24055e-05	-0.000518903	-0.000434572	-0.000215712	-0.000234047	-0.000323265	-0.000648031	-0.000155377	-0.000581875	-0.000497544	-0.000278684	-0.000297019	-0.000386237	-0.000807715	-0.000628062	9.31051e-05	-0.000323265	-0.000630674	0.000389923	0.000966258	0.000878653	0.000164322
677	3.63613e-05	-0.000695714	-0.000619211	-4.993e-06		1.23333	-83.2	-14.6		677	-0.000100123	-0.000116261	-5.26337e-05		677	6.42191e-05	-0.000555677	-0.0001224	-0.000490136	-0.000389689	-0.000106146	-0.000320033	-0.000233042	-0.000619896	-0.000186619	-0.000554355	-0.000453908	-0.000170365	-0.000384252	-0.000297261	-0.00072268	-0.000536651	0.000117972	-0.000233042	-0.000587394	0.000400733	0.000897873	0.000876416	8.87302e-05
676	0.000252387	-0.000199103	-0.000342129	9.014e-05		1.25	-83.4	-20		676	-5.68926e-05	-5.2827e-05	-3.20303e-05		676	0.000306496	-0.000411444	0.000116609	-0.00015738	-0.000146561	0.000165017	-0.000141885	4.75644e-05	-0.00071794	-0.000189887	-0.000463876	-0.000453057	-0.000141479	-0.000448381	-0.000258932	-0.00046793	-0.00026626	0.000306297	4.75644e-05	-0.000454664	0.000583474	0.00110362	0.000754417	4.47177e-05
675	-1.33719e-05	-0.000282377	-0.000163169	2.11203e-05		1.26667	-84.4	-20		675	-4.38888e-05	-0.000102562	-9.95624e-05		675	0.000178952	-0.000530414	-4.44729e-05	-0.00035701	-0.000274579	-5.17196e-05	-0.000301303	-0.000123872	-0.000709366	-0.000223425	-0.000535962	-0.000453531	-0.000230672	-0.000480255	-0.000302824	-0.0006774	-0.000445438	0.00011722	-0.000123872	-0.00052388	0.000597254	0.00111514	0.000840422	0.000120388
674	-6.1995e-05	-0.00067243	-0.000486818	-0.000127685		1.28333	-85.2	-20.2		674	8.94324e-06	-9.7528e-05	-0.000130398		674	0.00033948	-0.000333794	8.5644e-05	-0.000283438	-0.000159093	-9.94344e-05	-0.00017873	-8.13844e-05	-0.000673274	-0.000253836	-0.000622918	-0.000498573	-0.000438914	-0.00051821	-0.000420864	-0.000439401	-0.000464227	0.00017131	-8.13844e-05	-0.000426728	0.000435242	0.00102605	0.000869744	0.000164777
673	1.2623e-05	-0.000551203	-0.000332032	-0.000131683		1.3	-87.2	-15.6		673	-1.04854e-05	-8.23313e-05	-0.000133497		673	0.000345242	-0.000212942	0.000198002	-0.00021434	-0.000176101	4.67986e-05	-0.000126283	-4.50736e-05	-0.000558184	-0.00014724	-0.000559582	-0.000521343	-0.000298443	-0.000471525	-0.000390316	-0.000508577	-0.000441697	0.000217817	-4.50736e-05	-0.000293859	0.000360244	0.00105888	0.000828761	0.000219065
672	5.91313e-05	-0.000334467	-0.000170177	-0.000172767		1.31667	-91	-16.8		672	-4.55255e-05	-6.91587e-05	-0.000117496		672	0.000294498	-0.00031443	1.3656e-05	-0.000355604	-9.19364e-05	-9.16167e-07	-0.00018564	-0.000117636	-0.000608928	-0.000280842	-0.000650102	-0.000386434	-0.000295414	-0.000480138	-0.000412134	-0.000701456	-0.000512873	0.000280519	-0.000117636	-0.000416056	0.000428926	0.000904783	0.000761247	0.000107559
671	2.5968e-05	-0.000669817	-0.00056528	-0.000329651		1.33333	-90.6	-20.8		671	-8.72885e-05	-6.03943e-05	-2.79325e-05		671	0.000420496	-0.000254935	0.000148267	-0.000311017	1.39272e-05	3.585e-05	-0.000152536	-6.87528e-05	-0.000675431	-0.000272229	-0.000731513	-0.000406569	-0.000384646	-0.000573032	-0.000489249	-0.00067354	-0.000388814	0.000288934	-6.87528e-05	-0.000417046	0.000435499	0.000883975	0.000702663	3.44224e-05
670	6.71686e-05	-0.000785758	-0.000169999	-0.000143366		1.35	-88.2	-18.8		670	-3.93912e-05	-9.30627e-05	-4.53644e-05		670	0.000263988	-0.000297542	-5.2234e-05	-0.000202164	-7.5048e-05	-7.4884e-05	-0.000275625	-0.000109696	-0.00056153	-0.000316222	-0.000466152	-0.000339036	-0.000338872	-0.000539613	-0.000373684	-0.000601413	-0.000454328	0.000260641	-0.000109696	-0.000426926	0.00052101	0.000958774	0.000785877	0.000178359
669	0.000254147	-0.000600383	-0.00011963	7.58068e-06		1.36667	-90.6	-15.8		669	-6.34888e-05	-0.000121931	-6.29279e-05		669	0.000153293	-0.000436311	-0.000117867	-0.000308622	-0.000243574	-0.00015491	-0.000297403	-0.000168637	-0.000589604	-0.00027116	-0.000461915	-0.000396867	-0.000308203	-0.000450696	-0.00032193	-0.000570983	-0.000457179	0.000339816	-0.000168637	-0.000511427	0.0005121	0.00091488	0.000818782	0.000146107
668	0.000296258	-0.000762059	-0.000325973	6.74523e-05		1.38333	-92	-11.2		668	-6.96554e-05	-4.50933e-05	-0.000135663		668	0.000148858	-0.00050228	7.25175e-05	-0.00036879	-0.000201423	-0.000228462	-0.000290949	-0.00014674	-0.000651138	-7.63405e-05	-0.000517648	-0.000350281	-0.00037732	-0.000439807	-0.000295598	-0.00070888	-0.000477116	0.000308495	-0.00014674	-0.000543243	0.000552747	0.0011036	0.000855014	0.00019297
667	0.000106192	-0.000921656	-0.000472028	9.33264e-05		1.4	-92.6	-7		667	-2.57914e-05	-0.000110693	-8.24633e-05		667	0.000388442	-0.000334091	0.00015389	-0.000151321	-0.0002214	-0.000139744	-0.000242026	-0.000107558	-0.000722533	-0.000234552	-0.000539763	-0.000609842	-0.000528186	-0.000630468	-0.000496	-0.000752279	-0.000361809	0.000174893	-0.000107558	-0.000441834	0.000441201	0.00110928	0.000805933	0.000215402
666	0.00012401	-0.00065473	-0.000512655	0.00013544		1.41667	-89	-5.8		666	-2.2754e-05	-9.17638e-05	-5.90635e-05		666	0.000447205	-0.000181185	0.000276404	-0.000193829	-0.000131217	0.000106789	-0.00013838	-6.313e-05	-0.00062839	-0.000170801	-0.000641034	-0.000578422	-0.000340416	-0.000585585	-0.000510335	-0.000641703	-0.000455397	0.000143552	-6.313e-05	-0.000451516	0.000356403	0.000947073	0.000770949	0.000127595
665	0.000128066	-0.000664887	-0.000296394	8.75877e-05		1.43333	-92.8	-6.2		665	-8.42586e-05	2.73939e-06	-2.04968e-05		665	0.000369554	-0.000353394	9.10688e-05	-0.000414465	-0.000218074	8.80591e-05	-0.000124284	8.98959e-07	-0.000722948	-0.000278485	-0.000784019	-0.000587628	-0.000281495	-0.000493838	-0.000368655	-0.000625508	-0.000444468	0.000172815	8.98959e-07	-0.00060743	0.000690209	0.00121976	0.000931536	0.000157927
664	0.000371495	-0.000447557	-2.406e-05	6.69543e-05		1.45	-92.6	-9.2		664	-2.19568e-05	-8.72934e-05	-1.17002e-05		664	0.000239893	-0.000481412	-3.57219e-05	-0.000371067	-0.000203284	-4.4691e-05	-0.000268359	-0.000130822	-0.000721305	-0.000275615	-0.00061096	-0.000443177	-0.000284584	-0.000508252	-0.000370715	-0.000610857	-0.000524475	3.10362e-05	-0.000130822	-0.000593472	0.000760296	0.00111853	0.000885563	0.000228113
663	0.000273609	-0.000312609	-0.000191322	7.3054e-05		1.46667	-95.6	-7.8		663	-1.89567e-05	-6.26941e-05	-0.000107363		663	0.00036015	-0.000286653	3.70383e-05	-0.000263896	-0.00017711	-8.3833e-05	-0.000213932	-0.000156342	-0.000646803	-0.000323112	-0.000624046	-0.00053726	-0.000443983	-0.000574082	-0.000516492	-0.000636417	-0.00048759	5.39631e-05	-0.000156342	-0.000399228	0.000571734	0.000872234	0.000838007	0.000163965
662	4.84317e-06	-0.000403366	-0.000225535	-0.000112578		1.48333	-93.4	-6.4		662	-2.80936e-05	-8.02626e-05	-7.67984e-05		662	0.00027949	-0.000316212	-9.09008e-05	-0.000267638	-0.000329778	-0.000215851	-0.000283485	-0.000199582	-0.000595702	-0.000370391	-0.000547128	-0.000609268	-0.000495341	-0.000562975	-0.000479072	-0.000840759	-0.000503092	8.93829e-05	-0.000199582	-0.000494697	0.00058395	0.00109253	0.000919577	0.000208651
661	8.14457e-05	-0.000592364	-0.000377529	1.9399e-05		1.5	-90.8	-10.4		661	-5.74613e-05	-0.000138057	-3.34981e-05		661	0.000462212	-0.000232385	4.93927e-05	-0.000130671	-0.000184812	4.4502e-05	-8.59731e-05	-0.000101658	-0.000694597	-0.000412819	-0.000592883	-0.000647024	-0.00041771	-0.000548185	-0.00056387	-0.000680232	-0.000325854	0.000276223	-0.000101658	-0.000320944	0.000654987	0.00112641	0.000920646	0.000197781
660	1.73553e-05	-0.000628061	-0.000253451	0.000125521		1.51667	-93	-15.4		660	-5.42396e-06	-0.000139964	-7.06096e-06		660	0.000473814	-0.000187877	0.000111343	-0.000199254	-0.000250425	9.38601e-05	-3.30909e-05	-0.000112152	-0.000661691	-0.000362471	-0.000673068	-0.000724239	-0.000379954	-0.000506905	-0.000585966	-0.000532514	-0.000311659	0.000377968	-0.000112152	-0.000304808	0.000608282	0.00111501	0.000815159	8.99973e-05
659	2.25607e-05	-0.000527088	-0.000373728	0.000133974		1.53333	-91.4	-14.4		659	-1.85569e-05	-9.70611e-05	-2.2732e-05		659	0.000380147	-0.000314549	0.000130211	-0.000265599	-0.000176675	0.000187825	-6.38184e-05	-7.5227e-05	-0.000694696	-0.000249936	-0.000645746	-0.000556822	-0.000192322	-0.000443965	-0.000455374	-0.000636675	-0.000421977	0.000305169	-7.5227e-05	-0.000340089	0.000700564	0.000968555	0.000811576	0.000103817
658	-9.10064e-05	-0.000303165	-0.000477314	-0.000107629		1.55	-92.4	-13.8		658	-1.79236e-05	-6.9561e-05	-4.03328e-05		658	0.000305644	-0.000242878	0.000205604	-0.000196383	-7.34048e-05	0.000288521	3.95247e-06	2.79439e-05	-0.000548522	-0.00010004	-0.000502027	-0.000379049	-1.7123e-05	-0.000301692	-0.0002777	-0.000599097	-0.000208092	0.00030901	2.79439e-05	-0.000349414	0.000594086	0.00102027	0.000992397	0.000146918
657	-2.00236e-05	-0.000258499	1.864e-05	-3.0343e-06		1.56667	-97	-13.8		657	-3.65575e-05	-2.40951e-05	-3.61306e-05		657	0.000410003	-0.00013652	0.000277097	-1.11267e-05	7.07494e-05	0.000171194	7.91676e-05	0.000173029	-0.000546523	-0.000132906	-0.00042113	-0.000339254	-0.000238809	-0.000330835	-0.000236974	-0.000525089	-0.000210012	0.000431979	0.000173029	-0.000276397	0.000561003	0.00127769	0.0010098	0.000178299
656	0.000199719	-0.00051022	-0.000180156	0.00015395		1.58333	-97.6	-12.4		656	-3.60583e-05	-5.6828e-05	1.19653e-05		656	0.000317365	-0.000279011	0.000231659	-0.00023113	-2.77094e-05	1.02411e-06	-0.000117493	1.49362e-05	-0.000596376	-8.5706e-05	-0.000548495	-0.000345074	-0.000316341	-0.000434858	-0.000302429	-0.000676707	-0.000486679	0.000235893	1.49362e-05	-0.000443299	0.000661501	0.00121131	0.000870873	0.000225737
655	0.000322057	-0.000377945	-0.000133649	0.000137916		1.6	-97.6	-12.8		655	-6.65237e-05	-0.000132295	1.88373e-05		655	0.000149136	-0.000352068	-1.91504e-05	-0.000431453	-0.000123198	-0.00012939	-0.000185046	-0.000181467	-0.000501204	-0.000168286	-0.000580589	-0.000272334	-0.000278526	-0.000334182	-0.000330603	-0.000746894	-0.000764455	0.000106172	-0.000181467	-0.00064681	0.000622834	0.0010876	0.000950285	0.000284539
654	0.000354627	-0.00038329	-0.000182829	0.000173374		1.61667	-99.8	-13.6		654	1.0406e-05	-0.000124859	-2.1597e-05		654	0.000145869	-0.000402198	-5.8233e-05	-0.000305454	-0.000226548	-0.000154198	-0.000133787	-0.000111003	-0.000548067	-0.000204102	-0.000451323	-0.000372417	-0.000300067	-0.000279656	-0.000256872	-0.000761446	-0.00061931	0.000190614	-0.000111003	-0.000494954	0.000577317	0.00113047	0.000938624	0.000327819
653	0.000269173	-0.000433361	-0.00030667	5.08197e-05		1.63333	-101	-13.6		653	2.84787e-05	-7.57624e-05	-9.31946e-05		653	0.00027658	-0.000382221	6.30735e-05	-0.000340537	-0.000118605	1.73686e-06	-0.000118443	-0.000173983	-0.000658801	-0.000213506	-0.000617117	-0.000395185	-0.000274843	-0.000395023	-0.000450563	-0.000667719	-0.000383845	0.000182377	-0.000173983	-0.000364501	0.000466623	0.00108184	0.000871269	0.000159887
652	0.000132978	-0.000632754	-0.000292949	-2.93063e-05		1.65	-94.4	-12.2		652	1.44299e-06	-0.000100128	-1.08285e-05		652	8.26319e-05	-0.000609411	-6.34598e-05	-0.000523734	-0.000161192	1.93484e-06	-0.00018564	-0.000213224	-0.000692043	-0.000146092	-0.000606366	-0.000243824	-8.06971e-05	-0.000268272	-0.000295856	-0.000682509	-0.000491728	-3.08742e-05	-0.000213224	-0.000660827	0.000551222	0.00104492	0.000979627	0.000224529
651	0.00014292	-0.000954146	-0.000586128	8.5449e-05		1.66667	-95.6	-7.8		651	2.23096e-05	-0.00011113	3.76028e-05		651	0.00013981	-0.000493846	6.87898e-07	-0.000473762	-0.000246445	7.47847e-06	-0.00022785	-4.16088e-05	-0.000633656	-0.000139122	-0.000613572	-0.000386255	-0.000132332	-0.00036766	-0.000181419	-0.00073644	-0.000483016	8.31859e-05	-4.16088e-05	-0.000635149	0.000722798	0.00119182	0.0010982	0.000302615
650	0.000191132	-0.000949632	-0.000761287	0.000137954		1.68333	-101.8	-8.4		650	-3.26608e-05	-5.04602e-05	-7.32933e-07		650	0.00033069	-0.000302769	1.18287e-06	-0.000299198	-8.89665e-05	3.18309e-05	-0.00017483	4.33077e-05	-0.000633459	-0.000329507	-0.000629888	-0.000419657	-0.000298859	-0.00050552	-0.000287382	-0.000682885	-0.000364897	0.000333699	4.33077e-05	-0.000398297	0.000851529	0.00124203	0.000976974	0.000370624
649	0.000390834	-0.000611965	-0.000441796	0.000280483		1.7	-102.6	-12		649	-1.45559e-05	-3.22957e-05	-6.92659e-05		649	0.000348231	-0.00038139	-3.9345e-05	-0.000359187	-0.000153174	5.08282e-06	-0.000199895	-0.000213481	-0.000729621	-0.000387576	-0.000707418	-0.000501405	-0.000343148	-0.000548126	-0.000561712	-0.000710563	-0.000561776	0.000164816	-0.000213481	-0.000446626	0.000710245	0.00112122	0.000815733	0.000303209
648	0.000283826	-0.000441142	-0.000444765	8.56264e-05		1.71667	-98	-11.8		648	-3.75503e-06	-3.4295e-05	-2.0698e-05		648	0.000379731	-0.000247293	8.18229e-05	-0.000211034	-9.45299e-05	0.000180539	-4.77221e-05	-4.47766e-05	-0.000627024	-0.000297908	-0.000590765	-0.000474261	-0.000199192	-0.000427453	-0.000424508	-0.000591217	-0.000444647	0.00028933	-4.47766e-05	-0.000516891	0.000621844	0.00106293	0.000871229	0.000403569
647	0.000164378	-0.00028499	-0.000274536	9.62583e-05		1.73333	-95	-15		647	-9.1724e-05	-2.15272e-05	-9.66384e-07		647	0.000394639	-0.000354978	0.000100711	-0.000116733	-3.73316e-05	0.000109244	-0.000132421	4.08527e-05	-0.000749617	-0.000293928	-0.000511372	-0.000431971	-0.000285395	-0.00052706	-0.000353786	-0.000652157	-0.000428907	0.000379374	4.08527e-05	-0.000467078	0.000527563	0.00095822	0.000903917	0.000248505
646	0.00024688	-6.998e-05	-2.062e-05	0.00019026		1.75	-95	-17.4		646	-8.3958e-05	-3.78638e-05	1.65052e-05		646	0.000376543	-0.000492955	2.74359e-05	-0.000108992	-8.40564e-05	4.29973e-05	-0.000122145	-5.06964e-05	-0.000869498	-0.000349107	-0.000485535	-0.000460599	-0.000333546	-0.000498688	-0.000427239	-0.00071282	-0.000460169	0.000433761	-5.06964e-05	-0.000331655	0.000605352	0.000971425	0.000978954	0.000211205
645	0.000282734	-0.000371174	-0.000252679	0.000232096		1.76667	-97.6	-17.4		645	-1.29137e-06	-0.000109993	-1.82989e-05		645	0.000392244	-0.000384122	4.13346e-05	-0.000240514	-3.60248e-05	-1.36863e-05	-8.17164e-05	-9.74608e-05	-0.000776366	-0.000350909	-0.000632758	-0.000428269	-0.00040593	-0.00047396	-0.000489705	-0.000629468	-0.000407861	0.000330412	-9.74608e-05	-0.000271823	0.000644355	0.000965624	0.000951176	0.000288618
644	0.00031101	-0.000702128	-0.000467217	0.000247224		1.78333	-104.8	-12		644	-1.80577e-05	-4.05609e-05	1.15357e-05		644	0.000341262	-0.000128798	0.00015977	-0.000210618	2.05597e-05	7.52691e-05	-4.41583e-05	2.21825e-05	-0.00047006	-0.000181492	-0.00055188	-0.000320702	-0.000265993	-0.00038542	-0.00031908	-0.000452468	-0.000278932	0.000417368	2.21825e-05	-0.000267725	0.000732677	0.00110113	0.00114522	0.000417645
643	0.000296417	-0.000411147	-0.00010906	0.000143419		1.8	-108.8	-12.8		643	-0.000114724	2.20066e-05	3.80447e-06		643	0.000253455	-0.00017774	8.8396e-05	-0.000116852	-0.000306871	-6.2787e-05	-0.000205557	-3.37091e-05	-0.000431195	-0.000165059	-0.000370307	-0.000560326	-0.000316242	-0.000459012	-0.000287164	-0.000599117	-0.000424769	0.000235774	-3.37091e-05	-0.000281841	0.000711136	0.00122455	0.0012363	0.000369891
642	0.000357793	-0.000343733	7.281e-05	0.0001963		1.81667	-112.4	-13.2		642	-6.19242e-05	-9.69811e-06	-2.3867e-05		642	0.000221817	-0.000327319	9.73252e-05	-5.60698e-05	-0.000225558	-3.53659e-05	-0.000179166	-0.000101203	-0.000549136	-0.000124492	-0.000277887	-0.000447375	-0.000257183	-0.000400983	-0.00032302	-0.00069324	-0.000405901	0.000154065	-0.000101203	-0.000395921	0.000596264	0.00114641	0.00102463	0.00031392
641	0.000161387	-0.000170474	4.74e-06	6.00643e-05		1.83333	-114	-13		641	-1.3858e-05	-1.44963e-05	-6.33973e-05		641	0.000336095	-0.000255193	0.000160107	-3.17174e-05	-0.000134108	8.52279e-05	-8.69887e-06	-1.55538e-05	-0.000591288	-0.000175988	-0.000367812	-0.000470203	-0.000250867	-0.000344794	-0.000351649	-0.000556846	-0.000239493	0.000215679	-1.55538e-05	-0.00039111	0.000377093	0.0010148	0.000852519	0.000148166
640	5.51901e-06	-0.000830899	-0.000416968	5.0978e-05		1.85	-111	-13		640	3.31402e-05	-6.08935e-05	-9.07285e-05		640	0.000346568	-0.000260637	0.000112729	-0.000115723	-0.000204769	2.50597e-05	-9.20513e-05	0.000140856	-0.000607205	-0.000233839	-0.000462291	-0.000551337	-0.000321508	-0.000438619	-0.000205712	-0.000648514	-0.000396813	0.000201839	0.000140856	-0.000431519	0.000568605	0.00114599	0.00099598	0.00030014
639	0.000254683	-0.000799478	-0.000485749	2.17163e-05		1.86667	-107.8	-10.2		639	2.58412e-05	-6.02925e-05	-1.39603e-06		639	0.000357972	-0.000248659	0.000101919	-0.000184801	-0.000112982	6.1608e-05	-6.34224e-05	4.2397e-05	-0.000606631	-0.000256053	-0.000542773	-0.000470954	-0.000296364	-0.000421394	-0.000315575	-0.000607115	-0.000460406	0.000235022	4.2397e-05	-0.000381369	0.000692664	0.00121542	0.00116082	0.000379216
638	0.000136879	-0.000494302	-0.00051907	4.39704e-05		1.88333	-105.6	-12.8		638	3.25417e-05	-4.63947e-05	1.23702e-05		638	0.000126229	-0.000371688	-1.35136e-06	-0.000338438	-0.000262878	-0.00011068	-0.000153625	-0.000190099	-0.000497917	-0.00012758	-0.000464667	-0.000389107	-0.000236909	-0.000279854	-0.000316328	-0.000680212	-0.000548827	0.000142107	-0.000190099	-0.00046288	0.000686843	0.00121891	0.00112952	0.000382226
637	0.000195602	-0.000600917	-0.000381212	9.5467e-05		1.9	-106.8	-11.2		637	2.38444e-05	-1.43299e-05	1.85045e-05		637	8.60373e-05	-0.000399585	-3.18611e-05	-0.000264985	-0.000287191	-8.97726e-05	-0.000196707	-0.000268739	-0.000485622	-0.000117898	-0.000351022	-0.000373228	-0.00017581	-0.000282744	-0.000354776	-0.000647524	-0.000560687	0.000161509	-0.000268739	-0.000482699	0.000768968	0.00126003	0.00101683	0.000471161
636	0.000137752	-0.000536651	-0.000295147	-0.000127548		1.91667	-106	-9		636	4.36406e-05	4.33878e-06	6.8401e-05		636	0.000250723	-0.000348623	3.8444e-05	-0.000245286	-0.000217163	-4.53048e-05	-0.000164831	-0.000103242	-0.000599346	-0.000212279	-0.000496009	-0.000467886	-0.000296028	-0.000415554	-0.000353965	-0.00050923	-0.000509606	0.000303961	-0.000103242	-0.00037044	0.000800587	0.00126357	0.00103851	0.000390818
635	0.000125794	-0.000499825	-0.00011197	2.33348e-06		1.93333	-111	-12.6		635	-6.40228e-05	8.40431e-06	2.94022e-05		635	0.000247476	-0.000420591	9.20192e-05	-0.000296129	-0.00026169	1.52e-05	-0.00013056	4.86929e-05	-0.000668067	-0.000155457	-0.000543605	-0.000509166	-0.000232276	-0.000378036	-0.000198783	-0.00056433	-0.000545382	0.000253395	4.86929e-05	-0.00030756	0.000888374	0.00131204	0.00113665	0.00037692
634	0.000302162	-0.00036862	0.00015115	0.000221781		1.95	-112.2	-13.2		634	-1.38878e-05	-3.33636e-05	-4.56501e-06		634	0.000191921	-0.000309322	3.5296e-05	-0.000315848	-0.000254543	-4.46316e-05	-0.000175206	0.000115078	-0.000501243	-0.000156625	-0.000507769	-0.000446464	-0.000236553	-0.000367127	-7.6843e-05	-0.000682766	-0.000540868	0.000191762	0.000115078	-0.000371034	0.000858537	0.00127163	0.00116362	0.000391947
633	0.00028919	-0.000459436	-7.01e-05	0.000281554		1.96667	-107.4	-12.6		633	3.39772e-05	-8.70277e-05	-3.24625e-05		633	0.000376484	-0.000330269	7.67148e-05	-0.000285853	-0.00017808	-1.52996e-06	-0.000152041	4.62379e-05	-0.000706753	-0.000299769	-0.000662337	-0.000554564	-0.000378014	-0.000528525	-0.000330246	-0.000691853	-0.000620399	7.6395e-05	4.62379e-05	-0.00050422	0.000697139	0.00122895	0.00103368	0.000345143
632	0.000156682	-0.00041774	-0.000340288	0.000301592		1.98333	-104.2	-13.4		632	-2.02258e-05	-1.28919e-05	-4.70333e-05		632	0.000345994	-0.000463158	9.25934e-05	-0.000298465	-0.000252444	-0.000112125	-8.95369e-05	-0.000117873	-0.000809152	-0.000253401	-0.000644459	-0.000598438	-0.000458119	-0.000435531	-0.000463867	-0.000675935	-0.000568091	9.02739e-05	-0.000117873	-0.000500181	0.000799399	0.00137332	0.00113227	0.000418754
631	0.000168103	-0.000297582	-0.000150399	0.00017573		2	-110	-12		631	-1.70568e-05	-3.2261e-05	-4.62957e-05		631	0.000188931	-0.000534097	4.9446e-06	-0.000311393	-0.000369078	-3.83159e-05	-0.000147626	-0.000193207	-0.000723028	-0.000183986	-0.000500324	-0.000558009	-0.000227247	-0.000336557	-0.000382138	-0.000708484	-0.000478284	0.000109083	-0.000193207	-0.000504557	0.000852459	0.0012353	0.00109183	0.00027759
630	0.000368704	-0.000287069	-7.14e-05	0.000299609		2.01667	-111.6	-4.8		630	5.46749e-05	-7.87948e-05	-2.06334e-05		630	0.000220431	-0.000468979	5.36098e-05	-0.000303791	-0.000282855	-4.46118e-05	-0.000199736	-8.23941e-05	-0.00068941	-0.000166821	-0.000524222	-0.000503286	-0.000265043	-0.000420167	-0.000302825	-0.000652058	-0.000426887	0.000228983	-8.23941e-05	-0.000397426	0.000704682	0.00105385	0.00108422	0.000226489
629	0.000393924	-0.000351989	8.6e-06	0.000245579		2.03333	-111.8	-1.6		629	2.87121e-05	-6.6397e-05	2.61661e-05		629	0.000400183	-0.000230662	0.000190023	-0.000207688	-0.000232111	0.000116411	-8.13204e-05	-1.21952e-06	-0.000630845	-0.00021016	-0.000607871	-0.000632294	-0.000283772	-0.000481503	-0.000401402	-0.000585337	-0.000385528	0.000394916	-1.21952e-06	-0.000304095	0.000740399	0.00122538	0.00128086	0.00041917
628	0.000212948	-0.000480759	-0.000186927	5.10987e-05		2.05	-107	-7.8		628	5.05423e-05	-6.63945e-05	1.79333e-05		628	0.000314356	-0.000329933	4.13742e-05	-0.000289714	-0.000268323	6.04399e-05	-0.000100723	-8.1424e-05	-0.000644289	-0.000272982	-0.00060407	-0.000582679	-0.000253916	-0.000415079	-0.00039578	-0.000851391	-0.000491767	0.000272659	-8.1424e-05	-0.000430054	0.000787797	0.00127918	0.00125241	0.000337758
627	0.000266642	-0.000366481	-0.000262301	0.000179769		2.06667	-106	-13.4		627	1.4109e-05	-8.06947e-05	7.00077e-06		627	0.000229499	-0.000435875	-2.29913e-05	-0.00035505	-0.000293031	-0.000132874	-0.000240383	-0.000163588	-0.000665374	-0.00025249	-0.000584549	-0.00052253	-0.000362373	-0.000469882	-0.000393087	-0.000884475	-0.000665719	0.000143532	-0.000163588	-0.000505368	0.000715056	0.00123754	0.000981904	0.000288063
626	0.000451934	-0.000265805	-0.00021128	0.000356194		2.08333	-102.8	-17.2		626	-2.53915e-05	-5.92941e-05	-7.06666e-05		626	0.000347934	-0.000240304	9.64343e-05	-8.59063e-05	-6.42974e-05	0.000212375	-8.04295e-05	7.41144e-05	-0.000588238	-0.0002515	-0.00043384	-0.000412231	-0.000135559	-0.000428364	-0.00027382	-0.000530237	-0.000526633	0.000336629	7.41144e-05	-0.000384636	0.000648176	0.00116951	0.000946583	0.000310297
625	0.000318039	-0.000425521	-0.00051016	0.000114553		2.1	-104.8	-21.6		625	-4.23192e-05	-2.65315e-05	-5.07984e-05		625	0.000160619	-0.000315183	4.46806e-05	-0.000163735	-0.000126643	0.000147356	-0.000200706	-9.6273e-05	-0.000475802	-0.000115938	-0.000324354	-0.000287262	-1.3263e-05	-0.000361325	-0.000256892	-0.000502103	-0.00053966	0.000271927	-9.6273e-05	-0.000570744	0.00077467	0.00125447	0.00111083	0.000478665
624	0.000448508	-0.000611846	-0.000443577	2.21521e-05		2.11667	-105.8	-22.2		624	-3.69921e-05	-1.59188e-06	2.16534e-06		624	0.000210908	-0.000273111	0.00011067	-0.000443807	-0.000223142	-6.97562e-05	-0.000160852	-2.98161e-06	-0.000484019	-0.000100238	-0.000654715	-0.00043405	-0.000280664	-0.00037176	-0.00021389	-0.000568686	-0.000451002	0.000298279	-2.98161e-06	-0.000543738	0.000673954	0.00122188	0.00102035	0.00036504
623	0.000438693	-0.000467039	-1.43e-06	0.000179867		2.13333	-107	-20.2		623	4.15445e-05	-7.58965e-05	-1.64288e-05		623	0.000506066	-0.000283742	0.000202476	-0.000388391	-8.72638e-05	4.20272e-05	-2.00039e-05	0.000126264	-0.000789808	-0.00030359	-0.000894457	-0.00059333	-0.000464039	-0.00052607	-0.000379802	-0.000492916	-0.000160516	0.000406815	0.000126264	-0.000349137	0.000571773	0.00114627	0.000987051	0.000206889
622	0.000441381	-0.000389289	-0.000160377	0.000287115		2.15	-112.8	-21.6		622	1.76778e-05	1.12703e-05	-3.71613e-05		622	0.000434217	-0.000240443	0.000196418	-0.000247582	-0.000134068	1.05275e-05	4.94696e-05	0.000249729	-0.00067466	-0.000237799	-0.000681799	-0.000568285	-0.00042369	-0.000384747	-0.000184488	-0.000461813	-0.000189343	0.000448828	0.000249729	-0.000322211	0.000749585	0.00122087	0.00109961	0.000265018
621	0.000454847	-2.864e-05	-6.522e-05	0.000298004		2.16667	-113.8	-23		621	3.91404e-05	4.54734e-05	-3.54949e-05		621	0.0002392	-0.000371787	-4.26118e-05	-0.0003776	-0.000216312	-0.000273584	-4.63757e-05	-9.50058e-05	-0.000610987	-0.000281812	-0.0006168	-0.000455512	-0.000512784	-0.000285576	-0.000334206	-0.000699159	-0.000605174	0.000282301	-9.50058e-05	-0.000529661	0.00100879	0.00138787	0.00131015	0.000559424
620	0.000526043	-0.000551856	-0.000385666	0.000286485		2.18333	-111.2	-24.6		620	-4.42564e-05	-3.27949e-05	1.93438e-06		620	0.000296279	-0.000308946	0.000239183	-0.000113585	-0.000269728	4.666e-05	-7.78359e-05	4.16446e-05	-0.000605225	-5.7096e-05	-0.000409864	-0.000566007	-0.000249619	-0.000374115	-0.000254634	-0.000414137	-0.000218427	0.00036599	4.16446e-05	-0.000398495	0.00093698	0.00137211	0.0011807	0.000501018
619	0.000380641	-0.000569616	-0.000181047	0.000334457		2.2	-105.4	-20.4		619	-5.99548e-05	4.61365e-05	5.5032e-06		619	0.000435543	-0.000271745	0.000224552	-0.000153123	-0.000160242	6.00835e-05	-0.00010102	4.96432e-05	-0.000707288	-0.000210991	-0.000588666	-0.000595785	-0.00037546	-0.000536563	-0.0003859	-0.00040305	-0.000254065	0.000297625	4.96432e-05	-0.000197558	0.00100479	0.00136477	0.00124582	0.000448868
618	0.000207029	-0.000200351	0.00020016	0.000196338		2.21667	-103.6	-14.8		618	1.78765e-05	1.49062e-05	8.01887e-07		618	0.000238151	-0.000324508	8.01598e-05	-7.74325e-05	-0.000114705	-3.06736e-05	-0.000141865	-2.71954e-05	-0.000562659	-0.000157991	-0.000315583	-0.000352856	-0.000268825	-0.000380016	-0.000265346	-0.000537345	-0.000218071	0.000319958	-2.71954e-05	-0.000238977	0.000948661	0.00131382	0.00121396	0.00045948
617	0.000102966	-6.326e-05	0.00011374	0.000223919		2.23333	-103.8	-9.6		617	5.60483e-05	-3.10291e-05	3.11009e-05		617	0.000225499	-0.000402079	0.000137536	-0.000140372	-0.000222192	-3.70883e-05	-0.000186432	-0.000222608	-0.000627578	-8.7963e-05	-0.000365871	-0.000447691	-0.000262587	-0.000411931	-0.000448107	-0.000463693	-0.00035579	0.000254207	-0.000222608	-0.000455852	0.000790628	0.00138803	0.00116791	0.00040147
616	0.000161966	-0.000254757	7.275e-05	0.000168422		2.25	-100.2	-9.6		616	1.77076e-05	-3.60608e-05	0.000125537		616	0.000403945	-0.000425263	-3.19997e-05	-0.000355485	-0.00023417	-9.95334e-05	-0.000223	-0.000225242	-0.000829208	-0.000435945	-0.00075943	-0.000638115	-0.000503478	-0.000626945	-0.000629187	-0.00036767	-0.000362403	0.000194949	-0.000225242	-0.000440567	0.000813654	0.0013965	0.00120246	0.000340807
615	0.000375395	-0.000371233	-0.000241453	0.000221663		2.26667	-104.6	-14		615	-4.21876e-05	2.05016e-05	9.90701e-05		615	0.000396243	-0.000383251	-6.78156e-05	-0.000281755	-0.000291151	-5.44242e-09	-0.000171959	-0.000114389	-0.000779494	-0.000464059	-0.000677998	-0.000687394	-0.000396248	-0.000568202	-0.000510632	-0.000436886	-0.000195401	0.000167271	-0.000114389	-0.000462762	0.000839511	0.00132695	0.00124948	0.000420912
614	0.000483634	-0.00045415	-0.00028208	0.000232274		2.28333	-110	-12		614	-2.46589e-05	5.11408e-05	5.4235e-05		614	0.000392323	-0.000188689	8.52282e-05	-0.000175812	-0.000151491	0.000134883	-3.79613e-05	-4.19652e-05	-0.000581012	-0.000307095	-0.000568135	-0.000543814	-0.00025744	-0.000430284	-0.000434288	-0.000492006	-5.82952e-05	0.000234626	-4.19652e-05	-0.000334941	0.000823276	0.00123609	0.00104736	0.000262622
613	0.000527985	-0.000212408	0.00020099	0.000336039		2.3	-109.6	-10.8		613	-3.70566e-05	3.05052e-05	9.78358e-05		613	0.00039163	-0.000191283	0.00016181	-0.000106378	-7.39598e-06	0.00013423	2.87998e-05	-5.9883e-05	-0.000582913	-0.00022982	-0.000498008	-0.000399026	-0.0002574	-0.00036283	-0.000451513	-0.000488561	-0.000144459	0.000372979	-5.9883e-05	-0.00032625	0.000874951	0.0012509	0.00108521	0.000335303
612	0.000624144	-0.000481353	0.00020348	0.00053755		2.31667	-107.4	-14.6		612	1.26785e-05	-5.64977e-05	8.64364e-05		612	0.000335441	-0.000352365	-1.35135e-06	-0.000272925	-0.000249296	-0.000127509	-8.74778e-05	-0.000180279	-0.000687806	-0.000336792	-0.000608366	-0.000584737	-0.00046295	-0.000422919	-0.00051572	-0.000515804	-0.000345277	0.000176893	-0.000180279	-0.000681933	0.000792687	0.00129985	0.00110406	0.000448037
611	0.000534398	-0.000445181	-5.519e-05	0.000233561		2.33333	-104.6	-14.4		611	-5.6897e-06	-3.78936e-05	2.77333e-05		611	0.000106964	-0.00049252	-1.33494e-05	-0.000274786	-0.000306455	-0.000132379	-0.00018954	-0.000254029	-0.000599484	-0.000120313	-0.00038175	-0.000413419	-0.000239343	-0.000296504	-0.000360993	-0.000631091	-0.000399407	-2.02621e-05	-0.000254029	-0.000702306	0.00093991	0.00146544	0.00119999	0.000457857
610	0.000645074	-0.000352108	-4.046e-05	0.000157851		2.35	-105.6	-16		610	1.79435e-05	2.07723e-05	7.58019e-05		610	0.000164044	-0.000419839	6.34893e-05	-0.000183157	-0.000204472	-0.000124104	-0.00012561	-0.000231518	-0.000583883	-0.000100555	-0.000347201	-0.000368516	-0.000288148	-0.000289654	-0.000395562	-0.000614381	-0.000350702	0.000167132	-0.000231518	-0.000558726	0.00115554	0.00141266	0.00149376	0.000474488
609	0.000816922	-0.000328884	-0.000158417	0.000253143		2.36667	-108.8	-20		609	5.61452e-05	2.76069e-05	8.70672e-05		609	0.00043689	-0.000215199	0.000263377	-7.15721e-05	-0.000152461	5.77869e-05	-2.68939e-05	-4.95877e-05	-0.000652089	-0.000173513	-0.000508462	-0.000589351	-0.000379103	-0.000463784	-0.000486478	-0.000295999	-0.000159308	0.000517351	-4.95877e-05	-0.000352146	0.00112364	0.00145374	0.00147034	0.000540061
608	0.000791482	1.953e-05	0.00014777	0.00026617		2.38333	-108.6	-20.2		608	4.45421e-05	4.09385e-05	6.67718e-05		608	0.000459757	-0.00021223	0.000319249	-0.000182108	-0.000120981	0.000141575	-2.62603e-05	1.49164e-05	-0.000671987	-0.000140508	-0.000641865	-0.000580738	-0.000318182	-0.000486017	-0.000444841	-0.000296177	-3.40418e-05	0.000519093	1.49164e-05	-0.000440627	0.001014	0.00138591	0.00125261	0.000538061
607	0.000778615	-1.753e-05	0.00049339	0.000336236		2.4	-104	-20.6		607	-4.78575e-05	6.13705e-05	5.7168e-05		607	0.00043982	-0.000322924	0.000314695	-0.000277122	-9.58169e-05	1.54771e-05	3.77092e-05	-8.43146e-05	-0.000762744	-0.000125125	-0.000716942	-0.000535637	-0.000424343	-0.000402111	-0.000524135	-0.000328449	-0.000136163	0.000345499	-8.43146e-05	-0.000565992	0.00100087	0.00126518	0.00125172	0.000593398
606	0.000794925	-0.000309402	-0.00012183	0.000407572		2.41667	-109	-20.6		606	-7.36911e-05	2.41747e-05	6.24679e-05		606	0.000498879	-0.000261528	0.00030628	-0.000249958	-0.00021746	0.000108194	-6.30325e-06	9.71007e-05	-0.000760407	-0.000192599	-0.000748837	-0.000716339	-0.000390685	-0.000505182	-0.000401778	-0.000292098	-0.000203439	0.000343954	9.71007e-05	-0.000528929	0.00110394	0.00133861	0.00124582	0.000620206
605	0.000791423	-0.000258084	-0.000172256	0.000379396		2.43333	-112.2	-23.4		605	-4.30544e-05	-1.39325e-05	3.65349e-05		605	0.000252643	-0.000235711	7.6695e-05	-0.000302583	-0.000280558	5.06e-05	-5.59583e-05	7.14218e-05	-0.000488354	-0.000175948	-0.000555226	-0.000533201	-0.000202043	-0.000308601	-0.000181221	-0.000350623	-0.000196846	0.000245792	7.14218e-05	-0.000509051	0.00114041	0.00137059	0.00126213	0.000514976
604	0.000903151	-0.000525188	-0.000177958	0.000342336		2.45	-112.2	-25.4		604	2.47614e-06	-1.50625e-05	2.36354e-05		604	0.000259988	-0.00023969	0.000220651	-0.000167596	-0.00014767	0.000245063	-5.93043e-05	3.74995e-06	-0.000499678	-3.9337e-05	-0.000427584	-0.000407658	-1.4925e-05	-0.000319292	-0.000256238	-0.000180929	-7.2768e-05	0.000233676	3.74995e-06	-0.000414176	0.00107284	0.00129199	0.00111846	0.000509472
603	0.00112782	-0.000294434	7.097e-05	0.000382885		2.46667	-113.2	-22.8		603	2.37773e-05	-3.29638e-05	-5.56339e-06		603	0.000472804	-0.000197143	0.000318358	-6.22469e-05	-5.11115e-05	0.000212672	5.66962e-05	-1.29997e-05	-0.000669947	-0.000154446	-0.000535051	-0.000523916	-0.000260132	-0.000416108	-0.000485804	-0.000224427	-1.87572e-05	0.000341638	-1.29997e-05	-0.000417106	0.000959471	0.00136047	0.00119814	0.000458866
602	0.000936687	-0.000273942	-0.00010152	0.000262469		2.48333	-110.6	-24.4		602	8.86098e-05	-4.786e-05	1.95376e-05		602	0.000591319	-0.000153348	0.000343839	-3.13016e-05	6.5027e-06	0.000251022	0.000204117	8.82705e-05	-0.000744667	-0.00024748	-0.000622621	-0.000584816	-0.000340297	-0.000387202	-0.000503048	-5.14257e-05	0.000128941	0.000457223	8.82705e-05	-0.000334941	0.000967786	0.00139541	0.00123944	0.000479675
601	0.000890935	-0.00011149	-7.17e-05	0.000324557		2.5	-107.8	-20.8		601	9.36439e-05	-5.89961e-05	4.44697e-05		601	0.000386898	-0.000178711	0.000208554	-0.000188661	-0.000106548	0.000137833	2.77307e-05	2.80429e-05	-0.000565609	-0.000178344	-0.000575559	-0.000493446	-0.000249065	-0.000359167	-0.000358855	-0.000166614	2.872e-05	0.00024995	2.80429e-05	-0.000375152	0.00116674	0.00142965	0.0012048	0.000543823
600	0.00130092	-0.000312312	-0.000152121	0.000639377		2.51667	-107.2	-17.8		600	-1.82886e-05	-1.69599e-05	6.57387e-05		600	0.000409468	-0.000160179	0.00031915	-0.000177693	-0.00014565	4.91943e-05	1.38914e-05	-5.31118e-05	-0.000569647	-9.0318e-05	-0.000587161	-0.000555118	-0.000360274	-0.000395577	-0.00046258	-0.000139866	-9.05274e-05	0.000317998	-5.31118e-05	-0.000442151	0.00128427	0.00151302	0.00131654	0.000580806
599	0.00120304	-0.000254104	-8.762e-05	0.000576394		2.53333	-108.4	-17.8		599	-8.1924e-05	9.41729e-05	3.72352e-05		599	0.000517747	-0.000145449	0.000386901	-5.81882e-05	-0.000141017	0.000148544	6.81398e-05	0.000108485	-0.000663196	-0.000130846	-0.000575935	-0.000658764	-0.000369203	-0.000449607	-0.000409262	6.1605e-05	2.67203e-05	0.000348983	0.000108485	-0.00032229	0.00135679	0.00162201	0.00131599	0.000632164
598	0.00117762	-0.000252441	0.00027939	0.000317782		2.55	-112.8	-20		598	-4.62904e-05	2.91393e-05	7.55064e-05		598	0.000679503	-0.00017873	0.00043806	2.54216e-05	3.95665e-05	0.000236153	7.33073e-05	0.000202192	-0.000858233	-0.000241443	-0.000654081	-0.000639937	-0.00044335	-0.000606196	-0.000477311	6.28919e-05	0.00019786	0.000404835	0.000202192	-0.000166573	0.00135006	0.00144588	0.00127007	0.000518243
597	0.00124636	0.00014308	0.00042313	0.000207862		2.56667	-114.4	-27		597	-7.05812e-06	4.86722e-05	7.12024e-05		597	0.000593161	-0.000115335	0.000381199	-0.000103587	9.07263e-05	0.00012237	-8.79134e-05	8.87457e-05	-0.000708496	-0.000211962	-0.000696748	-0.000502435	-0.000470791	-0.000681074	-0.000504415	5.11315e-05	0.000184159	0.000405231	8.87457e-05	-0.000353156	0.00109058	0.00124302	0.00127619	0.000555741
596	0.00143728	0.00027321	0.00035696	0.000419667		2.58333	-118.2	-29.6		596	1.72109e-05	3.93044e-05	0.000105733		596	0.000603891	-0.000140756	0.000421707	-0.00015637	4.48131e-05	7.42594e-05	5.11525e-05	0.000197005	-0.000744647	-0.000182184	-0.000760261	-0.000559078	-0.000529632	-0.000552738	-0.000406886	0.000126762	0.000351834	0.000426812	0.000197005	-0.000410434	0.00121006	0.00155509	0.00140698	0.000673623
595	0.00139631	1.882e-05	0.00034722	0.000443528		2.6	-119.6	-24.4		595	-4.58583e-05	4.70083e-05	0.000120168		595	0.000570372	-8.18158e-05	0.000433368	-6.56325e-05	2.14309e-05	0.000114708	0.000141335	0.00019552	-0.000652188	-0.000137004	-0.000636004	-0.000548941	-0.000455664	-0.000429037	-0.000374852	0.000106726	0.000493514	0.000329244	0.00019552	-0.000352859	0.0013988	0.00166808	0.00135978	0.000510402
594	0.00130304	-0.000389765	-0.000191322	0.000503397		2.61667	-116.6	-23.2		594	-4.52945e-05	2.63403e-05	0.00011947		594	0.000590409	-9.69618e-05	0.000443941	-0.000132196	-5.20222e-05	0.000170897	9.64321e-05	0.000138322	-0.000687371	-0.000146468	-0.000722605	-0.000642431	-0.000419512	-0.000493977	-0.000452087	0.000240387	0.000343955	0.000405429	0.000138322	-0.000310688	0.00131953	0.00158665	0.00129839	0.000522381
593	0.00146947	-0.000461396	-0.00011446	0.000554301		2.63333	-116.2	-20		593	4.90447e-05	-6.32797e-06	0.000122808		593	0.000541902	-0.000170474	0.000391751	-5.94553e-05	-0.000101737	6.14299e-05	3.94317e-05	4.52876e-05	-0.000712376	-0.000150151	-0.000601357	-0.000643639	-0.000480472	-0.00050247	-0.000496614	0.000217599	0.00036993	0.000410636	4.52876e-05	-0.000449734	0.00142935	0.00155325	0.00130092	0.00064242
592	0.00178775	-0.000265746	0.00022498	0.000449466		2.65	-114.8	-16.6		592	-2.52897e-05	-9.32558e-06	6.74697e-05		592	0.000591379	-8.67853e-05	0.000409095	-1.08882e-06	-7.39598e-06	9.52262e-05	2.77505e-05	-4.70733e-05	-0.000678164	-0.000182284	-0.000592468	-0.000598775	-0.000496153	-0.000563629	-0.000638452	0.000269075	0.000421684	0.000432415	-4.70733e-05	-0.000345118	0.00153583	0.00167727	0.00128171	0.000629868
591	0.00199283	-0.00051117	9.164e-05	0.00053557		2.66667	-115	-21.6		591	-7.86234e-05	8.067e-05	6.88033e-05		591	0.000541268	7.51583e-06	0.000459225	5.97921e-05	7.09078e-05	0.000191705	2.43253e-05	1.05734e-06	-0.000533752	-8.2043e-05	-0.000481476	-0.00047036	-0.000349563	-0.000516943	-0.000540211	0.000488959	0.000598526	0.00047221	1.05734e-06	-0.000253727	0.00145428	0.00175632	0.00129645	0.000652893
590	0.00196741	-0.000540452	-0.000281307	0.000737579		2.68333	-114.4	-25.8		590	-4.22894e-05	5.60036e-05	9.68026e-05		590	0.000558354	0.000135118	0.000452414	7.81059e-05	6.38793e-05	0.000214078	0.000127952	5.46721e-05	-0.000423236	-0.00010594	-0.000480248	-0.000494475	-0.000344276	-0.000430402	-0.000503682	0.000652932	0.000760083	0.000560591	5.46721e-05	-0.000272179	0.00164308	0.00178994	0.00149095	0.000633293
589	0.00222441	-0.000352939	-0.000285049	0.000777053		2.7	-117.8	-25.6		589	-1.12901e-05	-1.13298e-05	5.68005e-05		589	0.000714051	7.89693e-05	0.00056101	0.000141283	0.00021029	0.000334988	0.000176874	8.3994e-05	-0.000635082	-0.000153041	-0.000572768	-0.000503761	-0.000379063	-0.000537177	-0.000630057	0.000736047	0.00071912	0.000708567	8.3994e-05	-0.000279624	0.00153147	0.00148275	0.0014251	0.000568195
588	0.0022355	2.256e-05	0.0001448	0.000741836		2.71667	-118.4	-23.4		588	-9.06214e-05	5.7002e-05	0.000134806		588	0.00065715	-0.000105198	0.000488191	2.35407e-05	0.000168159	0.00030038	8.40381e-05	0.000125749	-0.000762348	-0.000168959	-0.000633609	-0.000488991	-0.00035677	-0.000573112	-0.000531401	0.000646794	0.000798789	0.000583479	0.000125749	-0.000450348	0.00161556	0.00148589	0.00143494	0.000533983
587	0.00237051	-2.33501e-05	0.0003635	0.000671095		2.73333	-117.8	-22.6		587	-7.39569e-05	3.46751e-05	9.21361e-05		587	0.000676176	1.40296e-05	0.000452672	-9.43208e-05	0.000109515	0.000342531	0.000132287	0.000111811	-0.000662146	-0.000223504	-0.000770497	-0.000566661	-0.000333645	-0.000543889	-0.000564365	0.000756261	0.00101008	0.000459935	0.000111811	-0.000385349	0.00150102	0.00147924	0.00138473	0.000429901
586	0.0024988	-0.000422611	0.00010673	0.000604429		2.75	-114.4	-22.8		586	-9.49576e-05	3.10069e-05	2.74675e-05		586	0.000664218	6.20216e-05	0.000431052	1.15823e-05	7.84313e-05	0.000334671	0.000129219	0.000145746	-0.000602196	-0.000233166	-0.000652636	-0.000585787	-0.000329547	-0.000534999	-0.000518472	0.000895921	0.00100093	0.000398856	0.000145746	-0.000381369	0.00161267	0.0014225	0.00144436	0.000613751
585	0.00263723	-0.000502023	3.896e-05	0.000723145		2.76667	-112	-23.8		585	-9.42895e-05	3.03388e-05	7.47016e-06		585	0.000871094	0.000134881	0.000620584	0.000313809	0.000164278	0.000497575	0.000310555	0.000375747	-0.000736213	-0.00025051	-0.000557285	-0.000706816	-0.000373519	-0.000560539	-0.000495347	0.00115736	0.00116085	0.000528419	0.000375747	-0.000187679	0.00173696	0.00147324	0.00134943	0.000600645
584	0.00275965	-0.00029485	7.899e-05	0.000786756		2.78333	-110.4	-23.8		584	-9.79552e-05	5.66995e-06	1.11358e-05		584	0.00079976	0.000103183	0.000531332	0.00026059	0.000128007	0.000425072	0.000271215	0.00033417	-0.000696577	-0.000268428	-0.00053917	-0.000671753	-0.000374688	-0.000528545	-0.00046559	0.00116021	0.00122965	0.000612563	0.00033417	-0.000109672	0.0017256	0.00152888	0.00135764	0.000619117
583	0.00297031	-0.00019845	0.00018537	0.000905945		2.8	-113.8	-22.6		583	-9.76224e-05	1.80031e-05	7.647e-05		583	0.000697282	5.89528e-05	0.000464373	0.000192186	0.000175286	0.00042919	4.13324e-05	0.000190412	-0.000638329	-0.000232909	-0.000505096	-0.000521996	-0.000268092	-0.00065595	-0.00050687	0.00110905	0.00123185	0.000660119	0.000190412	-0.000252777	0.00173768	0.00153381	0.00138439	0.000708587
582	0.00322736	0.0002475	0.00015205	0.000940949		2.81667	-116.4	-21.8		582	-0.000133956	3.90038e-05	3.34677e-05		582	0.000694649	7.10005e-06	0.000322238	7.54331e-05	5.62964e-05	0.000233896	4.25599e-05	0.000140994	-0.000687549	-0.000372411	-0.000619216	-0.000638353	-0.000460753	-0.000652089	-0.000553655	0.00107672	0.00123365	0.000448867	0.000140994	-0.000344306	0.00190909	0.00155784	0.00145786	0.000783505
581	0.00340722	0.00043287	0.00028497	0.000963833		2.83333	-114.6	-25.8		581	-0.000158958	6.33374e-05	5.24692e-05		581	0.000655823	-2.81614e-05	0.000384545	5.70401e-05	2.3688e-05	0.000164858	2.53548e-05	0.000102466	-0.000683984	-0.000271278	-0.000598783	-0.000632135	-0.000490965	-0.000630468	-0.000553357	0.00131072	0.00127208	0.000346627	0.000102466	-0.000375727	0.0019573	0.00152991	0.00163748	0.000667841
580	0.00346757	0.00053432	0.0006284	0.00109008		2.85	-114.8	-21		580	-0.000119621	4.76689e-05	0.000112138		580	0.000684413	5.99131e-06	0.000440713	-0.000107804	6.23745e-05	0.000253873	9.09875e-05	0.000155725	-0.000678422	-0.0002437	-0.000792217	-0.000622038	-0.00043054	-0.000593426	-0.000528688	0.00139489	0.00132132	0.000363278	0.000155725	-0.000352602	0.00189482	0.00137425	0.00145149	0.000511056
579	0.00384306	0.00065852	0.00062436	0.00125493		2.86667	-116.2	-17.2		579	-0.000128291	7.30083e-05	0.000128137		579	0.000868045	0.000184239	0.000545013	0.000223408	0.000124265	0.000408065	0.000339065	6.37795e-05	-0.000683806	-0.000323032	-0.000644637	-0.00074378	-0.00045998	-0.00052898	-0.000804266	0.00163859	0.00157799	0.000518618	6.37795e-05	-0.000251193	0.00207523	0.00154832	0.00151374	0.000593794
578	0.00411426	0.0002918	0.00050308	0.00125223		2.88333	-110.4	-20		578	-0.000144961	2.50042e-05	7.74659e-05		578	0.00103772	0.00023035	0.000614249	0.000385797	0.00011987	0.000539548	0.000260207	0.00014139	-0.00080737	-0.000423471	-0.000651923	-0.00091785	-0.000498172	-0.000777513	-0.00089633	0.00184295	0.00169874	0.000662159	0.00014139	-0.000213377	0.00231554	0.00183308	0.0016471	0.000800691
577	0.00413259	0.00051531	0.00066808	0.00119233		2.9	-107.4	-24.2		577	-0.000146958	3.76702e-05	6.08014e-05		577	0.00104293	0.000287825	0.00065151	0.000322204	0.000263589	0.000536697	0.000238745	0.000156556	-0.000755105	-0.00039142	-0.000720726	-0.000779341	-0.000506233	-0.000804185	-0.000886374	0.00200463	0.00172618	0.000654398	0.000156556	-0.000392476	0.00233746	0.00195873	0.0015939	0.000890814
576	0.00436069	0.00020835	0.00051056	0.00140808		2.91667	-106.6	-23		576	-0.000196959	5.5338e-05	3.91401e-05		576	0.000968979	0.000337599	0.000715341	0.000332677	0.000407505	0.000532282	0.000185487	0.000162773	-0.00063138	-0.000253638	-0.000636302	-0.000561474	-0.000436697	-0.000783492	-0.000806206	0.00216034	0.00195228	0.00061191	0.000162773	-0.000283504	0.00238191	0.00174538	0.00157891	0.000833061
575	0.00456606	-7.295e-05	0.00048258	0.00154582		2.93333	-112.8	-21		575	-0.000188954	1.46703e-05	7.4138e-05		575	0.00097476	0.00049585	0.000923108	0.000481445	0.000461615	0.000763293	0.000345004	0.000226465	-0.00047891	-5.1652e-05	-0.000493315	-0.000513145	-0.000211467	-0.000629756	-0.000748295	0.00235708	0.00219178	0.000528557	0.000226465	-0.000276298	0.0026205	0.00179458	0.00168396	0.000917918
574	0.00473425	0.00023591	0.00063161	0.00160343		2.95	-112.6	-22		574	-0.000186957	3.37818e-07	0.000126801		574	0.00109264	0.000653349	0.00104915	0.000593208	0.000559994	0.000655172	0.00042315	0.000327577	-0.000439291	-4.349e-05	-0.000499432	-0.000532646	-0.000437468	-0.00066949	-0.000765063	0.00258928	0.00232693	0.000623729	0.000327577	-0.000191104	0.00267594	0.00191715	0.00169155	0.000869253
573	0.00518465	0.00048728	0.00060494	0.00174351		2.96667	-113.8	-26.8		573	-0.000212622	7.90035e-05	7.04723e-05		573	0.00130079	0.000586409	0.000934255	0.000697686	0.000549996	0.000632661	0.000345222	0.000258856	-0.000714381	-0.000366535	-0.000603104	-0.000750794	-0.000668129	-0.000955568	-0.00104193	0.00275365	0.00247807	0.00064923	0.000258856	-0.000192133	0.00260528	0.00187191	0.00154852	0.000724367
572	0.0054299	0.00071607	0.00109038	0.00185868		2.98333	-109.2	-25		572	-0.00017829	4.6673e-05	-6.52948e-06		572	0.00109583	0.000355497	0.000826629	0.000541989	0.000389013	0.00052359	0.000168202	8.51225e-05	-0.000740333	-0.000269201	-0.000553841	-0.000706817	-0.00057224	-0.000927628	-0.00101071	0.00278361	0.00252422	0.000489336	8.51225e-05	-0.000350503	0.00273593	0.0018903	0.00163211	0.000700153
571	0.00556726	0.00081645	0.00105421	0.00199228		3	-104.6	-23.6		571	-0.00024429	7.96691e-05	-7.25292e-05		571	0.00121189	0.000428356	0.000863574	0.000570103	0.000534613	0.000649649	0.000208413	0.000253094	-0.000783534	-0.000348316	-0.000641787	-0.000677277	-0.000562241	-0.00100348	-0.000958796	0.00294405	0.00280661	0.000567046	0.000253094	-0.000412018	0.00288519	0.00200626	0.00158935	0.000829735
570	0.00571916	0.00099446	0.00103758	0.00186899		3.01667	-101	-23.2		570	-0.000306291	8.23339e-05	4.28033e-05		570	0.00134591	0.000693679	0.000980069	0.000715405	0.000741588	0.000748385	0.000479616	0.000469138	-0.000652231	-0.000365841	-0.000630505	-0.000604322	-0.000597525	-0.000866294	-0.000876772	0.00315859	0.00313123	0.000608702	0.000469138	-0.000334248	0.00295627	0.0020182	0.00157844	0.000930213
569	0.0058302	0.00089758	0.00119047	0.00172895		3.03333	-105.6	-24.8		569	-0.000275289	3.10044e-05	4.34689e-05		569	0.00140837	0.000766854	0.00113026	0.000664978	0.000661225	0.000786517	0.000541289	0.000364383	-0.000641516	-0.00027811	-0.000743392	-0.000747145	-0.000621853	-0.000867081	-0.00104399	0.00343809	0.00317461	0.000687441	0.000364383	-0.000263369	0.00311436	0.00204871	0.00164274	0.00106839
568	0.00614043	0.00076145	0.00123876	0.00179597		3.05	-115	-22.6		568	-0.000338959	9.06736e-05	-2.71999e-05		568	0.00151671	0.000845712	0.00133187	0.000815072	0.000755823	0.000885174	0.000571739	0.00040893	-0.000670998	-0.00018484	-0.000701638	-0.000760887	-0.000631536	-0.000944971	-0.00110778	0.00368229	0.00335112	0.000777525	0.00040893	-0.000115414	0.00320078	0.00205667	0.00167331	0.00104776
567	0.006582	0.0012801	0.00169183	0.00199925		3.06667	-122.6	-20.6		567	-0.000364621	0.000114669	7.38027e-05		567	0.00165281	0.000854602	0.00133627	0.000944793	0.00105268	0.00105485	0.000614029	0.000565973	-0.000798208	-0.00031654	-0.000708017	-0.00060013	-0.00059796	-0.00103878	-0.00108684	0.00389576	0.00359704	0.000880003	0.000565973	-8.69431e-05	0.00334583	0.00195401	0.00173204	0.000940865
566	0.00695182	0.00211075	0.00167199	0.00205286		3.08333	-121.8	-21.8		566	-0.000347957	0.000119671	6.71369e-05		566	0.00148964	0.000703677	0.00119944	0.000845047	0.000944604	0.000827876	0.000463024	0.000409128	-0.000785963	-0.0002902	-0.000644593	-0.000545036	-0.000661764	-0.00102662	-0.00108051	0.00399673	0.00368195	0.00075939	0.000409128	-0.00024561	0.00348135	0.00205948	0.00184317	0.000947933
565	0.0075543	0.00184347	0.00172087	0.00245575		3.1	-117.6	-24.6		565	-0.000413957	0.000116338	6.98017e-05		565	0.0014759	0.000579757	0.00112519	0.000714732	0.000727749	0.000807602	0.000402658	0.000213596	-0.000896143	-0.00035071	-0.000761168	-0.000748151	-0.000668298	-0.00107324	-0.0012623	0.0039581	0.00372523	0.000434177	0.000213596	-0.00042556	0.00353221	0.00213846	0.00188771	0.000970959
564	0.00761593	0.00190571	0.00174481	0.002437		3.11667	-110.8	-27.4		564	-0.000442281	0.000155335	9.28091e-05		564	0.00161331	0.000761152	0.00124822	0.000895474	0.000900314	0.000980346	0.000508957	0.000249986	-0.000852158	-0.00036509	-0.000717836	-0.000712996	-0.000632964	-0.00110435	-0.00136332	0.00413894	0.00385123	0.000484109	0.000249986	-0.000363372	0.00368573	0.00198229	0.00195628	0.000896635
563	0.0078461	0.00194462	0.00208182	0.00253795		3.13333	-107.4	-25.2		563	-0.000477627	0.000167673	0.000116129		563	0.00173024	0.00104283	0.00152899	0.00120396	0.000945	0.00108136	0.000660991	0.000425482	-0.00068741	-0.00020125	-0.00052628	-0.00078524	-0.00064888	-0.00106925	-0.00130476	0.00460835	0.00424817	0.000860343	0.000425482	-0.000162416	0.00373234	0.00213464	0.00200678	0.0010085
562	0.00831381	0.00209578	0.00233794	0.00276781		3.15	-106.8	-23.4		562	-0.000447621	0.000130673	7.18084e-05		562	0.00179243	0.00118902	0.00163465	0.00128658	0.00106494	0.00119316	0.000590845	0.000503785	-0.00060341	-0.00015778	-0.00050585	-0.00072749	-0.00059927	-0.00120158	-0.00128864	0.00488819	0.00457654	0.00101541	0.000503785	-0.000113889	0.00388407	0.00219793	0.0020092	0.00111373
561	0.00881619	0.00239377	0.00245495	0.00306069		3.16667	-110	-25		561	-0.000416289	0.000130673	9.67977e-05		561	0.00196232	0.00120167	0.00186089	0.00132295	0.0012266	0.00128536	0.000725594	0.00063808	-0.00076065	-0.00010143	-0.00063937	-0.00073572	-0.00067696	-0.00123673	-0.00132424	0.00507629	0.00469673	0.000961911	0.00063808	-0.000213179	0.00396424	0.00217285	0.0019633	0.00107235
560	0.00904101	0.0024935	0.00231513	0.00298509		3.18333	-110.4	-22		560	-0.000445624	0.000147671	9.21336e-05		560	0.00212795	0.00123992	0.00184418	0.00138335	0.00142254	0.00124333	0.000833873	0.000596008	-0.00088803	-0.00028377	-0.0007446	-0.00070541	-0.00088462	-0.00129408	-0.00153194	0.00526697	0.00494091	0.000913404	0.000596008	-0.000303937	0.00412063	0.00220267	0.00194503	0.00110797
559	0.00938714	0.00236407	0.00223578	0.00306606		3.2	-110.2	-16.4		559	-0.000463625	0.000142341	0.000122467		559	0.00208709	0.00153522	0.00205056	0.00140588	0.00129702	0.00120221	0.000816649	0.000456526	-0.00055187	-3.653e-05	-0.00068121	-0.00079007	-0.00088488	-0.00127044	-0.00163056	0.00555562	0.00510714	0.000887586	0.000456526	-0.000263231	0.00427719	0.00225517	0.00194772	0.00126459
558	0.00953994	0.0024695	0.00269467	0.00341018		3.21667	-115.8	-19.2		558	-0.000459959	0.000114674	0.000103796		558	0.00209531	0.00143437	0.00204417	0.00127927	0.00106625	0.00123674	0.000646499	0.00032039	-0.00066094	-5.11401e-05	-0.00081604	-0.00102906	-0.00085857	-0.00144881	-0.00177492	0.00568037	0.00509958	0.000791523	0.00032039	-0.000306174	0.00443756	0.00235228	0.00210378	0.00119437
557	0.00984444	0.0026092	0.00278899	0.00349844		3.23333	-118	-25.2		557	-0.000453959	7.76699e-05	0.00010547		557	0.00229066	0.00149727	0.00194933	0.0014359	0.00138926	0.00137719	0.000771428	0.000401604	-0.00079339	-0.00034133	-0.00085476	-0.0009014	-0.00091347	-0.00151923	-0.00188906	0.00578926	0.0053487	0.0009275	0.000401604	-0.000343277	0.00457778	0.00239683	0.00216307	0.00111127
556	0.0103729	0.00286264	0.00287375	0.00375341		3.25	-115.8	-25.4		556	-0.000526289	0.000105004	0.00010847		556	0.00248241	0.00173287	0.00207874	0.00176048	0.00175572	0.00146941	0.00102329	0.000485531	-0.00074954	-0.00040367	-0.00072193	-0.00072669	-0.001013	-0.00145912	-0.00199688	0.00610285	0.00576834	0.00114727	0.000485531	-0.000165366	0.0048651	0.00262628	0.00222502	0.0013343
555	0.0108401	0.00315897	0.00310112	0.00407643		3.26667	-113.6	-25.2		555	-0.00048162	0.000126342	0.000135133		555	0.00258837	0.00177552	0.00219652	0.00176899	0.00166466	0.00153798	0.000960526	0.000502914	-0.00081285	-0.00039185	-0.00081938	-0.00092371	-0.00105039	-0.00162784	-0.00208546	0.00641647	0.00595644	0.00110414	0.000502914	-0.000239076	0.00494197	0.00256649	0.00229004	0.00140697
554	0.0113392	0.0033589	0.00324783	0.00430282		3.28333	-112.8	-21.4		554	-0.000480284	0.000113001	4.2468e-05		554	0.00274508	0.00200053	0.00253017	0.00199788	0.00181693	0.00184333	0.000990026	0.000737984	-0.00074455	-0.00021491	-0.0007472	-0.00092815	-0.00090175	-0.00175505	-0.0020071	0.00677839	0.00614805	0.00117942	0.000737984	-0.000124858	0.00502994	0.00260684	0.00241483	0.00141845
553	0.0116929	0.00358258	0.00369627	0.0046006		3.3	-111.8	-19.4		553	-0.000489955	0.000111342	5.44684e-05		553	0.00296655	0.00233174	0.00260592	0.00212923	0.002064	0.00198182	0.000985967	0.000813258	-0.00063481	-0.00036063	-0.00083732	-0.00090255	-0.00098473	-0.00198058	-0.00215329	0.0069969	0.00640663	0.00131512	0.000813258	4.15899e-05	0.00518688	0.00278661	0.00241757	0.00146616
552	0.0120066	0.00347317	0.00366318	0.00476082		3.31667	-112.2	-20.8		552	-0.000539288	0.000124008	7.64675e-05		552	0.00297039	0.00232945	0.00270249	0.0020106	0.00205026	0.00186436	0.00104265	0.000714958	-0.00064094	-0.0002679	-0.00095979	-0.00092013	-0.00110603	-0.00192774	-0.00225543	0.00711851	0.00652389	0.00119126	0.000714958	-0.000133688	0.00537202	0.00284695	0.00250763	0.00163305
551	0.0123649	0.00372478	0.00390991	0.0049103		3.33333	-112.6	-21		551	-0.000552619	0.000141	9.87994e-05		551	0.00303679	0.00237934	0.0030343	0.00218888	0.00215432	0.00194506	0.00114089	0.000705455	-0.00065745	-2.49012e-06	-0.00084791	-0.00088247	-0.00109173	-0.0018959	-0.00233134	0.00738143	0.00678011	0.00129785	0.000705455	-0.000104029	0.00546117	0.00280181	0.00245415	0.00156027
550	0.0127641	0.00415332	0.00430805	0.00510493		3.35	-112.2	-19.2		550	-0.000562628	0.000148346	4.54632e-05		550	0.00336646	0.00269125	0.00327062	0.00252085	0.00235314	0.00228003	0.00136135	0.000890414	-0.00067521	-9.58401e-05	-0.00084561	-0.00101332	-0.00108643	-0.00200511	-0.00247605	0.00783369	0.00714466	0.00136062	0.000890414	9.84913e-05	0.00562347	0.00282054	0.00253885	0.0014729
549	0.0132087	0.00430193	0.00462189	0.00552496		3.36667	-109.4	-22.6		549	-0.000587289	0.000198339	0.000110462		549	0.00359967	0.00288713	0.00325862	0.00278955	0.00248538	0.0023046	0.00145603	0.000939336	-0.00071254	-0.00034105	-0.00081012	-0.00111429	-0.00129507	-0.00214364	-0.00266033	0.00826752	0.00743521	0.00144235	0.000939336	0.000139019	0.00575623	0.002833	0.00242473	0.00145959
548	0.0133918	0.00450084	0.00489298	0.00570047		3.38333	-110	-22.8		548	-0.000590612	0.000224332	0.000102808		548	0.00378089	0.00294849	0.00340471	0.00292072	0.00260682	0.00232472	0.00143556	0.000847965	-0.0008324	-0.00037618	-0.00086017	-0.00117407	-0.00145617	-0.00234533	-0.00293292	0.00839479	0.00778004	0.00143433	0.000847965	9.74221e-05	0.00599342	0.00300792	0.00252729	0.00180965
547	0.0138287	0.00476231	0.00497964	0.00599991		3.4	-114.4	-23.4		547	-0.000614295	0.000199338	5.84719e-05		547	0.0037774	0.00300181	0.00341946	0.00288075	0.0026285	0.00223257	0.00137941	0.000760297	-0.00077559	-0.00035794	-0.00089665	-0.0011489	-0.00154483	-0.00239799	-0.0030171	0.00853231	0.00780316	0.00144514	0.000760297	-3.84804e-06	0.00614322	0.00300342	0.002727	0.00179555
546	0.0144149	0.00546276	0.00547191	0.00631653		3.41667	-115	-25.8		546	-0.000639955	0.000200003	-3.86466e-06		546	0.00382817	0.00302117	0.0034377	0.00302506	0.00260219	0.00230525	0.0014074	0.000787718	-0.000807	-0.00039047	-0.00080311	-0.00122598	-0.00152292	-0.00242077	-0.00304045	0.00871965	0.00789632	0.0015314	0.000787718	-8.68639e-05	0.00621875	0.00298153	0.00263513	0.00172224
545	0.0148716	0.00592564	0.00550185	0.00654645		3.43333	-116.2	-29.4		545	-0.000645623	0.000182673	-1.53511e-06		545	0.00413698	0.00323424	0.00352054	0.00312888	0.00271385	0.00247103	0.00135398	0.000820525	-0.00090274	-0.00061644	-0.0010081	-0.00142313	-0.00166595	-0.002783	-0.00331646	0.00903516	0.00815612	0.00147812	0.000820525	-9.56941e-05	0.00632842	0.00313748	0.00261838	0.00176178
544	0.0152643	0.00613905	0.00606712	0.00688016		3.45	-113.6	-25		544	-0.000579283	0.000140667	7.64625e-05		544	0.00447138	0.00359294	0.00403647	0.00339636	0.00321884	0.00278078	0.00148173	0.00091443	-0.00087844	-0.00043491	-0.00107502	-0.00125254	-0.0016906	-0.00298965	-0.00355695	0.00946107	0.00841595	0.0016827	0.00091443	9.26705e-05	0.006419	0.00312972	0.00272064	0.0016122
543	0.0156103	0.00606213	0.00628718	0.00712635		3.46667	-117	-20.4		543	-0.000566294	6.8004e-05	7.38101e-05		543	0.00460237	0.00376715	0.00426978	0.00363187	0.00339414	0.00294443	0.00169527	0.00101962	-0.00083522	-0.00033259	-0.0009705	-0.00120823	-0.00165794	-0.0029071	-0.00358275	0.00971605	0.00872006	0.00179973	0.00101962	0.000165846	0.0065918	0.00315567	0.00288545	0.00181585
542	0.0159916	0.00605025	0.00634295	0.00747467		3.48333	-116	-22.6		542	-0.000618627	5.40019e-05	4.58108e-05		542	0.00488698	0.00402675	0.00439197	0.00385371	0.00342425	0.00301898	0.00191945	0.00114677	-0.00086023	-0.00049501	-0.00103327	-0.00146273	-0.001868	-0.00296753	-0.00374021	0.00997225	0.00908911	0.00194783	0.00114677	0.000332611	0.00685385	0.00338257	0.00291992	0.00194115
541	0.0162387	0.00679971	0.00684538	0.00766854		3.5	-118.2	-24.8		541	-0.000718286	0.000198667	6.6136e-05		541	0.0050421	0.00417652	0.00445387	0.00400133	0.00354926	0.00312381	0.0018323	0.00114954	-0.00086558	-0.00058823	-0.00104077	-0.00149284	-0.00191829	-0.0032098	-0.00389256	0.0101177	0.00923477	0.00190282	0.00114954	0.000173152	0.00693622	0.00345002	0.00306205	0.00183824
540	0.0167876	0.00708558	0.00700504	0.00807657		3.51667	-117.4	-29		540	-0.000667622	0.00018167	5.81341e-05		540	0.00513731	0.00424683	0.00455571	0.00393253	0.00375243	0.00325933	0.00176427	0.000976716	-0.00089048	-0.0005816	-0.00120478	-0.00138488	-0.00187798	-0.00337304	-0.00416059	0.0102768	0.00939967	0.00210489	0.000976716	0.000133238	0.00695505	0.00337704	0.00305524	0.00170604
539	0.0171832	0.00756301	0.00749518	0.00866754		3.53333	-119.4	-31.2		539	-0.000605295	0.000171339	6.91361e-05		539	0.00543309	0.00462379	0.00491931	0.00423674	0.00396188	0.00347896	0.00190318	0.00104556	-0.0008093	-0.00051378	-0.00119635	-0.00147121	-0.00195413	-0.00352991	-0.00438753	0.0107234	0.00967626	0.00222162	0.00104556	0.000264662	0.00715751	0.00352041	0.00305492	0.001823
538	0.017608	0.0077899	0.00792348	0.00898059		3.55	-121.6	-32.8		538	-0.000608961	0.000113676	7.48085e-05		538	0.00565956	0.00487229	0.00513072	0.00447634	0.00424332	0.00355851	0.00197713	0.00118278	-0.00078727	-0.00052884	-0.00118322	-0.00141624	-0.00210105	-0.00368243	-0.00447678	0.0110737	0.00987104	0.00218646	0.00118278	0.000280144	0.00725622	0.00347732	0.00302281	0.0019267
537	0.0179743	0.00803241	0.00796928	0.00926848		3.56667	-126.2	-32.4		537	-0.000579958	0.000106673	2.01361e-05		537	0.00593463	0.00511126	0.00544499	0.00467469	0.00436617	0.00375658	0.00212374	0.00126673	-0.00082337	-0.00048964	-0.00125994	-0.00156846	-0.00217805	-0.00381089	-0.0046679	0.0112653	0.010065	0.00217951	0.00126673	0.000348588	0.00748068	0.00372103	0.00320648	0.00215015
536	0.0181531	0.00861343	0.00890093	0.00959455		3.58333	-128.8	-39		536	-0.00058796	0.000115002	4.28008e-05		536	0.00609519	0.0052976	0.00567915	0.00493522	0.00457796	0.00402586	0.00222825	0.00136806	-0.00079759	-0.00041604	-0.00115997	-0.00151723	-0.00206933	-0.00386694	-0.00472713	0.0115749	0.0103123	0.00225047	0.00136806	0.000415231	0.00752655	0.00373574	0.00317477	0.00215033
535	0.0185669	0.00918903	0.00922173	0.0100386		3.6	-128.6	-46.8		535	-0.000540291	6.36678e-05	3.84646e-05		535	0.00638235	0.0055674	0.00581164	0.00515942	0.00481255	0.00405375	0.00223538	0.00130042	-0.00081495	-0.00057071	-0.00122293	-0.0015698	-0.0023286	-0.00414697	-0.00508193	0.0116909	0.0104581	0.00234918	0.00130042	0.000389472	0.00790013	0.00384914	0.00332593	0.00220194
534	0.0191054	0.00937253	0.00932023	0.0104536		3.61667	-137.6	-53		534	-0.000517959	8.50062e-05	7.94676e-05		534	0.00661851	0.00586111	0.00607251	0.00537734	0.00495368	0.00421408	0.00238963	0.0013365	-0.0007574	-0.000546	-0.00124117	-0.00166483	-0.00240443	-0.00422888	-0.00528201	0.0118591	0.0107304	0.00263668	0.0013365	0.000409806	0.00796858	0.00413274	0.00354296	0.00236051
533	0.0192062	0.00982093	0.00984203	0.0106837		3.63333	-154.6	-64.6		533	-0.000501951	8.0665e-05	8.71318e-05		533	0.00684142	0.00605292	0.00638723	0.00552052	0.00511591	0.00440609	0.00239644	0.00123851	-0.0007885	-0.00045419	-0.0013209	-0.00172551	-0.00243533	-0.00444498	-0.00560291	0.0120042	0.0108528	0.00260381	0.00123851	0.000236963	0.00813263	0.00428036	0.00360616	0.00243747
532	0.0193819	0.0103666	0.0104174	0.0109017		3.65	-167.2	-73		532	-0.000529627	0.000125339	9.81338e-05		532	0.00718822	0.00621133	0.00654207	0.0058827	0.00546001	0.00457341	0.00247807	0.0014287	-0.00097689	-0.00064615	-0.00130552	-0.00172821	-0.00261481	-0.00471015	-0.00575952	0.0122578	0.0110273	0.00283924	0.0014287	0.000342292	0.00821539	0.00421831	0.00358052	0.00247405
531	0.0199191	0.010619	0.0107248	0.0114003		3.66667	-179.6	-83.2		531	-0.000517959	0.000164673	8.18071e-05		531	0.00757934	0.00651914	0.00688261	0.00617766	0.0056458	0.00475019	0.00268582	0.00152924	-0.0010602	-0.00069673	-0.00140168	-0.00193354	-0.00282915	-0.00489352	-0.0060501	0.0125867	0.0113908	0.00309258	0.00152924	0.000409667	0.00821179	0.00428161	0.0036335	0.0025345
530	0.0199786	0.0108523	0.0110368	0.0117856		3.68333	-187.8	-92.2		530	-0.000540286	0.000177672	8.41366e-05		530	0.00800511	0.00693196	0.00729527	0.00655558	0.00589047	0.00511803	0.0028535	0.00148424	-0.00107315	-0.00070984	-0.00144953	-0.00211464	-0.00288708	-0.00515161	-0.00652087	0.0128765	0.0116702	0.00321783	0.00148424	0.000527034	0.00831634	0.00441489	0.00368698	0.002415
529	0.0201548	0.0113045	0.0115629	0.0120187		3.7	-201	-103.8		529	-0.000514964	0.000196338	8.34661e-05		529	0.00822076	0.00715003	0.00730695	0.00666077	0.00602661	0.00514367	0.00282738	0.00131731	-0.00107073	-0.00091381	-0.00155999	-0.00219415	-0.00307709	-0.00539338	-0.00690345	0.0129276	0.0116457	0.00306819	0.00131731	0.000470112	0.00856448	0.00451297	0.00379712	0.00251686
528	0.0205563	0.0119916	0.0117745	0.0129568		3.71667	-210.2	-111		528	-0.000547623	0.000238677	0.00012513		528	0.00841205	0.00738159	0.00763474	0.00681437	0.00626641	0.00515595	0.00294002	0.00155749	-0.00103046	-0.00077731	-0.00159768	-0.00214564	-0.0032561	-0.00547203	-0.00685456	0.0131349	0.0117716	0.00339446	0.00155749	0.000547248	0.00867268	0.00460999	0.0039269	0.00259075
527	0.0209523	0.0123811	0.0123776	0.01341		3.73333	-214.8	-116.4		527	-0.000529294	0.000173003	9.54764e-05		527	0.0086085	0.00755127	0.00801485	0.00700531	0.00652611	0.00533415	0.00302408	0.00162989	-0.00105723	-0.000593649	-0.00160319	-0.00208239	-0.00327435	-0.00558442	-0.00697861	0.0131932	0.0119841	0.00344787	0.00162989	0.000595755	0.00876902	0.00470498	0.00395598	0.00263892
526	0.0212749	0.0129915	0.0129816	0.0136878		3.75	-219.8	-121.4		526	-0.000440622	0.000139003	6.38015e-05		526	0.00926476	0.00802647	0.0085	0.00752981	0.00696831	0.00581605	0.00330518	0.00188684	-0.00123829	-0.000764759	-0.00173495	-0.00229645	-0.00344871	-0.00595958	-0.00737792	0.0136082	0.0122883	0.00365746	0.00188684	0.000873352	0.00872473	0.00483783	0.00396778	0.00276591
525	0.021409	0.0134666	0.0133217	0.014183		3.76667	-223	-132.8		525	-0.000480627	0.000172004	4.77977e-05		525	0.00949821	0.00846842	0.0086595	0.00793398	0.00719776	0.00608506	0.00337757	0.00185338	-0.00102979	-0.00083871	-0.00156423	-0.00230045	-0.00341315	-0.00612064	-0.00764483	0.0139023	0.0125088	0.00371555	0.00185338	0.000940212	0.00891848	0.00502031	0.00413643	0.00285003
524	0.0216572	0.0136144	0.0135806	0.0145009		3.78333	-223.2	-136.6		524	-0.000467618	0.000194331	9.51387e-05		524	0.00976884	0.0086196	0.00897454	0.00805933	0.00735813	0.00614784	0.00350473	0.00173314	-0.00114924	-0.0007943	-0.00170951	-0.00241071	-0.003621	-0.00626411	-0.0080357	0.0140669	0.0126344	0.00376952	0.00173314	0.000847535	0.0091173	0.00526972	0.00424706	0.00306641
523	0.0219585	0.0143439	0.0142708	0.0148846		3.8	-230.2	-137.8		523	-0.000424291	0.000191674	0.000121136		523	0.0100744	0.00884968	0.00915815	0.00828969	0.0075241	0.00625204	0.00349048	0.00154456	-0.00122472	-0.00091625	-0.00178471	-0.0025503	-0.00382236	-0.00658392	-0.00852984	0.0141266	0.0126936	0.00385735	0.00154456	0.000830033	0.00917428	0.00534489	0.00430161	0.00309805
522	0.0221227	0.0146844	0.0146238	0.0152504		3.81667	-239	-142.2		522	-0.000421623	0.000177339	0.000141471		522	0.0102436	0.00919089	0.00939785	0.00852363	0.00787169	0.00638295	0.00357072	0.00166302	-0.00105271	-0.00084575	-0.00171997	-0.00237191	-0.00386065	-0.00667288	-0.00858058	0.0141978	0.0126747	0.00412099	0.00166302	0.000942172	0.00928994	0.00544129	0.00439591	0.00321603
521	0.0223029	0.0151555	0.0152709	0.0157771		3.83333	-245.6	-143.4		521	-0.000346959	0.000204672	0.000131473		521	0.0105001	0.00943812	0.00978187	0.00882597	0.00818149	0.00665835	0.00372408	0.00194337	-0.00106198	-0.00071823	-0.00167413	-0.00231861	-0.00384175	-0.00677602	-0.00855673	0.0143051	0.0127913	0.00439765	0.00194337	0.000989808	0.00931564	0.00549328	0.00445631	0.00316465
520	0.0226125	0.01565	0.015571	0.0163628		3.85	-250.4	-148.2		520	-0.000319297	0.000145003	0.000189806		520	0.0110239	0.00970348	0.0101379	0.00911986	0.00827853	0.00692793	0.00390966	0.00203478	-0.00132042	-0.000886	-0.00190404	-0.00274537	-0.00409597	-0.00711424	-0.00898912	0.0144256	0.013014	0.00448505	0.00203478	0.00104823	0.00952281	0.00560418	0.00467347	0.00335013
519	0.022894	0.0159279	0.0158935	0.0169761		3.86667	-255.6	-151.2		519	-0.000219618	0.000104333	0.000153139		519	0.0115345	0.010029	0.0103787	0.00939455	0.00844185	0.00710992	0.00410616	0.00194828	-0.0015055	-0.0011558	-0.00213995	-0.00309265	-0.00442458	-0.00742834	-0.00958622	0.0144966	0.0131321	0.00455949	0.00194828	0.00119896	0.00967445	0.00570606	0.00488377	0.00334743
518	0.0229073	0.0166417	0.0164658	0.0172545		3.88333	-258.8	-155.6		518	-0.000262956	0.000124003	0.00014014		518	0.0116136	0.0102883	0.0104946	0.00969759	0.00869535	0.00710198	0.00415516	0.00201724	-0.0013253	-0.001119	-0.00191601	-0.00291825	-0.00451162	-0.00745844	-0.00959636	0.0145961	0.0130552	0.00464941	0.00201724	0.00119536	0.00949288	0.00562788	0.00480614	0.00328768
517	0.0231312	0.0171989	0.0171383	0.0176187		3.9	-260	-155.8		517	-0.000240624	0.000207002	0.000103136		517	0.0118208	0.0106564	0.0107321	0.0099224	0.00889963	0.00735774	0.00400938	0.00196235	-0.0011644	-0.0010887	-0.0018984	-0.00292117	-0.00446306	-0.00781142	-0.00985845	0.0146532	0.0132306	0.00459134	0.00196235	0.0012682	0.00958542	0.00567937	0.00474908	0.00328635
516	0.0234106	0.0176077	0.0176417	0.0182192		3.91667	-263	-156.2		516	-0.000174954	0.000233342	0.000118131		516	0.0122495	0.0110694	0.0111209	0.0102885	0.0093156	0.00762957	0.00416191	0.00196956	-0.0011801	-0.0011286	-0.001961	-0.0029339	-0.00461993	-0.00808759	-0.0102799	0.0147922	0.0134701	0.00478268	0.00196956	0.00144769	0.0097405	0.00580169	0.00488628	0.00339814
515	0.0233289	0.018342	0.0182481	0.0188394		3.93333	-262	-156.4		515	-0.000162626	0.000177011	0.00016347		515	0.0126597	0.0113495	0.0116269	0.0106208	0.00957293	0.00787337	0.00446448	0.00212367	-0.0013102	-0.0010328	-0.0020389	-0.00308677	-0.00478633	-0.00819522	-0.010536	0.0149905	0.0135901	0.00509738	0.00212367	0.00155031	0.00978394	0.00596847	0.00485896	0.00341819
514	0.0234647	0.0188699	0.0189406	0.0194336		3.95	-262.4	-157		514	-0.000148957	0.000201677	0.000148803		514	0.0131303	0.0115922	0.0117397	0.010776	0.00984577	0.00793489	0.00458194	0.00214448	-0.0015381	-0.0013906	-0.0023543	-0.00328453	-0.00519541	-0.00854836	-0.0109858	0.0151059	0.0134586	0.00526189	0.00214448	0.00146149	0.00964648	0.00603878	0.00483261	0.00340297
513	0.0235772	0.0195578	0.0196249	0.0197364		3.96667	-269	-157.4		513	-0.000117625	0.000238334	0.000109141		513	0.0133205	0.0117886	0.0119877	0.0110347	0.00999523	0.00811044	0.00461902	0.00207548	-0.0015319	-0.0013328	-0.0022858	-0.00332527	-0.00521006	-0.00870148	-0.011245	0.0151198	0.0135146	0.00529337	0.00207548	0.0013841	0.00984145	0.00634685	0.00507847	0.00357801
512	0.0235047	0.0199558	0.0198095	0.0199514		3.98333	-272.6	-163.8		512	-4.36206e-05	0.000148336	0.00018313		512	0.0135575	0.0122871	0.0124389	0.0115228	0.0102583	0.00845781	0.0047607	0.00215418	-0.0012704	-0.0011186	-0.0020347	-0.0032992	-0.00509969	-0.0087968	-0.0114033	0.0153528	0.0136717	0.00547274	0.00215418	0.00154132	0.00986707	0.00637541	0.00515903	0.00351752
511	0.0235955	0.0204583	0.0205209	0.0203465		4	-273.4	-174.4		511	-1.32918e-05	0.000140011	0.000155136		511	0.0138951	0.01274	0.0128162	0.0116963	0.0105077	0.00874442	0.00492846	0.00223742	-0.0011551	-0.0010789	-0.0021988	-0.0033874	-0.00515068	-0.00896664	-0.0116577	0.0154834	0.0137196	0.00571205	0.00223742	0.00170258	0.00977119	0.0063745	0.00522793	0.00365598
510	0.0238392	0.0209078	0.0207447	0.0209876		4.01667	-276.8	-178.4		510	-9.09517e-05	0.000282998	0.000187133		510	0.0143151	0.0130318	0.0130938	0.011974	0.0107221	0.00888317	0.00503171	0.00226515	-0.0012833	-0.0012213	-0.0023411	-0.003593	-0.00543193	-0.00928339	-0.01205	0.0155731	0.0137843	0.00591411	0.00226515	0.00165797	0.00990602	0.00657404	0.00524729	0.00362648
509	0.0238153	0.0211644	0.0209603	0.02106		4.03333	-278	-180		509	-1.06245e-05	0.000266999	0.000204796		509	0.0146682	0.0133398	0.0133887	0.0123987	0.0110521	0.00918672	0.00528295	0.00237943	-0.0013284	-0.0012795	-0.0022695	-0.0036161	-0.00548148	-0.00938525	-0.0122888	0.0156952	0.013945	0.0062241	0.00237943	0.00173794	0.00998654	0.00671837	0.00541475	0.00379013
508	0.023915	0.0216078	0.0213908	0.0216125		4.05	-274.2	-183		508	4.73758e-05	0.000210668	0.000215803		508	0.0149654	0.013631	0.0135708	0.0126168	0.0114974	0.0094388	0.00545013	0.00246589	-0.0013344	-0.0013946	-0.0023486	-0.003468	-0.0055266	-0.00951527	-0.0124995	0.0157432	0.0139998	0.00631355	0.00246589	0.00186689	0.0100868	0.00684035	0.00548206	0.00393627
507	0.0241607	0.0223059	0.0220355	0.0222254		4.06667	-252.8	-163.8		507	0.000106037	0.000138675	0.000196467		507	0.0151543	0.0137413	0.0139588	0.0127313	0.0114902	0.00953252	0.00531701	0.00223241	-0.001413	-0.0011955	-0.002423	-0.0036641	-0.00562178	-0.00983729	-0.0129219	0.0155491	0.0138601	0.00633937	0.00223241	0.00166019	0.00990863	0.006774	0.00541407	0.00384523
506	0.0239942	0.0228213	0.022369	0.0224252		4.08333	-120	-19.4		506	0.000153035	0.000128339	0.000252803		506	0.0155788	0.0140651	0.0143354	0.0131192	0.0117086	0.00969865	0.00528711	0.00243748	-0.0015137	-0.0012434	-0.0024596	-0.0038702	-0.00588015	-0.0102917	-0.0131413	0.0156114	0.0139038	0.00666244	0.00243748	0.00188027	0.00993714	0.00678513	0.00554188	0.0038087
505	0.023986	0.0232539	0.0231127	0.0228884		4.1	66	169		505	0.000189046	0.000186006	0.000257134		505	0.0160502	0.0145809	0.0147122	0.0134382	0.0121371	0.00997688	0.00548821	0.00265681	-0.0014693	-0.001338	-0.002612	-0.0039131	-0.00607332	-0.010562	-0.0133934	0.0158258	0.0140329	0.00687809	0.00265681	0.00193226	0.00994748	0.00695168	0.00564635	0.00401813
504	0.0240768	0.0239129	0.024014	0.023265		4.11667	124	224.2		504	0.000266373	0.000182673	0.00028714		504	0.0162841	0.0147359	0.0148791	0.0136199	0.0123297	0.0101012	0.00552357	0.00256508	-0.0015482	-0.001405	-0.0026642	-0.0039544	-0.0061829	-0.0107605	-0.013719	0.0158415	0.0140462	0.00709489	0.00256508	0.00199279	0.0100719	0.00723937	0.00584961	0.00422111
503	0.0242485	0.0240893	0.0240627	0.0238124		4.13333	82.4	177.8		503	0.000274375	0.000200336	0.000309134		503	0.0166265	0.0151312	0.0151843	0.0139487	0.0126685	0.0103494	0.00574688	0.00257195	-0.0014953	-0.0014422	-0.0026778	-0.003958	-0.0062771	-0.0108796	-0.0140546	0.0156702	0.0140056	0.00729933	0.00257195	0.00221095	0.0100617	0.00731779	0.00595242	0.00419011
502	0.0241658	0.0248532	0.0246063	0.0240823		4.15	17.8	113.4		502	0.000296374	0.000202671	0.0002578		502	0.0169041	0.0153533	0.0154953	0.0141938	0.0128686	0.010548	0.00589339	0.00275143	-0.0015508	-0.0014088	-0.0027103	-0.0040355	-0.0063561	-0.0110107	-0.0141527	0.0156394	0.0139091	0.00744946	0.00275143	0.0022686	0.0101222	0.00736171	0.00589837	0.00427282
501	0.0241018	0.025466	0.0247475	0.0244709		4.16667	-26.4	60.2		501	0.000310709	0.000237669	0.0002518		501	0.0171241	0.0155316	0.0157043	0.0143074	0.0129604	0.0106598	0.00590938	0.00270789	-0.0015925	-0.0014198	-0.0028167	-0.0041637	-0.0064643	-0.0112147	-0.0144162	0.0156879	0.0138331	0.007546	0.00270789	0.0023164	0.0101346	0.00740659	0.00577853	0.00423758
500	0.0239554	0.0255713	0.0253205	0.0249253		4.18333	-60.4	30.6		500	0.000281046	0.000301669	0.000235135		500	0.0173146	0.0158439	0.0159558	0.0145023	0.0132301	0.0108281	0.00602041	0.00261838	-0.0014707	-0.0013588	-0.0028123	-0.0040845	-0.0064865	-0.0112942	-0.0146962	0.0156857	0.0140049	0.00775779	0.00261838	0.00237516	0.0101376	0.00755144	0.00591823	0.00427051
499	0.0240136	0.0259165	0.0256465	0.0253261		4.2	-84.2	10		499	0.000341376	0.000180339	0.000312805		499	0.0176507	0.0159699	0.0161667	0.0147853	0.0134	0.0109713	0.00597496	0.00253937	-0.0016808	-0.001484	-0.0028654	-0.0042507	-0.0066794	-0.0116757	-0.0151113	0.0156936	0.0139734	0.00784211	0.00253937	0.00246168	0.0100377	0.00757308	0.00605345	0.00425772
498	0.0241361	0.0262241	0.0263062	0.0256672		4.21667	-97.6	0.6		498	0.000457044	0.000188336	0.000260139		498	0.0177776	0.0163232	0.0163635	0.0151231	0.013668	0.0111476	0.00609763	0.0025852	-0.0014544	-0.0014141	-0.0026545	-0.0041096	-0.00663	-0.01168	-0.0151924	0.0158117	0.0140132	0.00817162	0.0025852	0.00260833	0.0099949	0.00766112	0.00617242	0.00431983
497	0.0239575	0.0265099	0.0264356	0.0259024		4.23333	-100	-4.8		497	0.000487045	0.000174001	0.000267813		497	0.0183029	0.0167592	0.0166817	0.0155083	0.0140118	0.0114053	0.00637346	0.00283167	-0.0015437	-0.0016212	-0.0027946	-0.0042911	-0.0068976	-0.0119294	-0.0154712	0.0158067	0.0140265	0.00860741	0.00283167	0.00278074	0.00997217	0.00775206	0.00615532	0.00442268
496	0.0238122	0.0273903	0.0270862	0.0260655		4.25	-101.6	-6.4		496	0.000448371	0.000220676	0.0003588		496	0.0186208	0.016847	0.0169384	0.0155961	0.0141549	0.0114662	0.006498	0.0029036	-0.0017738	-0.0016824	-0.0030247	-0.0044659	-0.0071546	-0.0121228	-0.0157172	0.0156311	0.0138279	0.00868229	0.0029036	0.00283334	0.0101523	0.00786315	0.00616235	0.00441143
495	0.0237986	0.0275263	0.0271317	0.0265692		4.26667	-103.4	-9		495	0.000565375	0.000140677	0.000305801		495	0.018609	0.0169295	0.0171134	0.0156823	0.014301	0.0115404	0.00653257	0.00277333	-0.0016795	-0.0014956	-0.0029267	-0.004308	-0.0070686	-0.0120764	-0.0158357	0.0154946	0.0135993	0.0087991	0.00277333	0.00277777	0.0101693	0.00806311	0.00635623	0.00453044
494	0.0238054	0.0279873	0.0274659	0.0268964		4.28333	-101.8	-7.8		494	0.000629708	0.000137339	0.000296473		494	0.0186893	0.0171977	0.0173498	0.0157036	0.0143054	0.0117943	0.00661819	0.00280021	-0.0014916	-0.0013395	-0.0029857	-0.0043839	-0.006895	-0.0120711	-0.0158891	0.0154905	0.0135889	0.00880627	0.00280021	0.00284902	0.0100229	0.00812192	0.00653096	0.00457073
493	0.0235292	0.0284364	0.0279843	0.0270119		4.3	-100.2	-8.8		493	0.00060004	0.00020501	0.000377804		493	0.0190256	0.0173885	0.0174968	0.0159766	0.0146223	0.0118587	0.00669933	0.00286767	-0.0016371	-0.0015288	-0.003049	-0.0044033	-0.0071669	-0.0123263	-0.0161579	0.0153207	0.0137743	0.00906996	0.00286767	0.00304317	0.00987303	0.0082061	0.00653381	0.00455606
492	0.0233987	0.0286737	0.0280262	0.0271856		4.31667	-105	-11.8		492	0.000686705	0.000173673	0.000356465		492	0.0192998	0.0175944	0.0177767	0.0163165	0.0148661	0.0120217	0.00668603	0.00285563	-0.0017054	-0.0015231	-0.0029833	-0.0044337	-0.0072781	-0.0126138	-0.0164442	0.0152273	0.0136662	0.00925884	0.00285563	0.00314963	0.00992239	0.00827387	0.00654779	0.00470459
491	0.0233644	0.0283513	0.0282785	0.0275977		4.33333	-107.6	-7		491	0.00065504	0.000238334	0.00034147		491	0.0194837	0.0178886	0.0181377	0.0166108	0.0150474	0.012257	0.00667838	0.0030277	-0.0015951	-0.001346	-0.0028729	-0.0044363	-0.0072267	-0.0128053	-0.016456	0.0153367	0.0135464	0.00958875	0.0030277	0.00331843	0.00995175	0.00839351	0.00662961	0.004798
490	0.0231048	0.0288946	0.0285089	0.0278123		4.35	-107	-2.2		490	0.000748376	0.000236005	0.000334466		490	0.0197241	0.0179521	0.0182481	0.0167494	0.0151032	0.0123265	0.00683836	0.00315309	-0.001772	-0.001476	-0.0029747	-0.0046209	-0.0073976	-0.0128857	-0.016571	0.0152594	0.0134066	0.00975456	0.00315309	0.00341035	0.00981962	0.00829688	0.00660255	0.00475858
489	0.0229721	0.0292251	0.0285527	0.0281302		4.36667	-99	4.6		489	0.000798717	0.000209664	0.000347475		489	0.0199193	0.0180903	0.0183207	0.0168505	0.0151652	0.0124316	0.00690159	0.0030773	-0.001829	-0.0015986	-0.0030688	-0.0047541	-0.0074877	-0.0130177	-0.016842	0.0150655	0.0133906	0.00979002	0.0030773	0.00343108	0.00973143	0.00822825	0.00658123	0.00469911
488	0.022885	0.0294924	0.0289186	0.0283614		4.38333	-85.6	11.8		488	0.000768378	0.000168006	0.0003708		488	0.0200184	0.0183595	0.018514	0.0170875	0.0152782	0.01241	0.00686776	0.00299614	-0.0016589	-0.0015044	-0.0029309	-0.0047402	-0.0076084	-0.0131506	-0.0170223	0.0150436	0.0131997	0.00999019	0.00299614	0.00343251	0.00972684	0.00832153	0.00654307	0.0047239
487	0.0226862	0.029751	0.0294271	0.0283739		4.4	-74	15.4		487	0.000793378	0.000151003	0.000345806		487	0.0202195	0.0185321	0.0186516	0.017216	0.0154629	0.0125832	0.00688035	0.00308256	-0.0016874	-0.0015679	-0.0030035	-0.0047566	-0.0076363	-0.0133391	-0.0171369	0.0149571	0.0130643	0.0102533	0.00308256	0.00345627	0.00990568	0.00862294	0.0068144	0.00492766
486	0.0224284	0.0298548	0.0294611	0.0285826		4.41667	-75	14.6		486	0.000894378	0.000183339	0.000330468		486	0.0203443	0.0186784	0.0187499	0.0172361	0.0154571	0.0126801	0.00696925	0.00315285	-0.0016659	-0.0015944	-0.0031082	-0.0048872	-0.0076642	-0.013375	-0.0171915	0.0148224	0.0129304	0.0103185	0.00315285	0.00357373	0.0097484	0.0085917	0.00686932	0.00492491
485	0.0222759	0.0300424	0.0298261	0.0288634		4.43333	-81.8	7		485	0.000909706	0.000220676	0.000414803		485	0.0204585	0.0187893	0.0187983	0.017386	0.0155532	0.0128606	0.00713647	0.0031673	-0.0016692	-0.0016602	-0.0030725	-0.0049053	-0.0075979	-0.013322	-0.0172912	0.0147807	0.0127474	0.0105167	0.0031673	0.00365574	0.00947039	0.00849819	0.00686993	0.00490062
484	0.0220289	0.0298181	0.0298938	0.0288695		4.45	-90.6	-4.6		484	0.000949378	0.000142674	0.000402803		484	0.020523	0.0189529	0.0190174	0.0176593	0.0158988	0.0131481	0.00742665	0.00321561	-0.0015701	-0.0015056	-0.0028637	-0.0046242	-0.0073749	-0.0130964	-0.0173074	0.0146342	0.0127822	0.0107955	0.00321561	0.00387737	0.00945399	0.00860201	0.00697338	0.00491187
483	0.0219219	0.0300925	0.0302477	0.02893		4.46667	-97.8	-14.4		483	0.000977044	0.000161002	0.000403136		483	0.0207298	0.0192319	0.0192505	0.0177411	0.0161194	0.0132454	0.00745958	0.00329332	-0.0014979	-0.0014793	-0.0029887	-0.0046104	-0.0074844	-0.0132702	-0.0174365	0.0145083	0.0127636	0.011077	0.00329332	0.00397487	0.00942624	0.00868463	0.00692606	0.00480697
482	0.0216613	0.0302211	0.0301905	0.0290837		4.48333	-102.8	-18.2		482	0.000929048	0.000232672	0.000401134		482	0.0206886	0.0192403	0.0192094	0.0177732	0.0160291	0.0131061	0.00716155	0.00324323	-0.0014483	-0.0014792	-0.0029154	-0.0046595	-0.0075825	-0.0135271	-0.0174454	0.0142686	0.0124632	0.0112833	0.00324323	0.00386167	0.00942739	0.00889794	0.00701907	0.00495814
481	0.021522	0.0305102	0.0303892	0.0291931		4.5	-105.8	-20		481	0.000941043	0.000229006	0.000418802		481	0.0208299	0.0193675	0.0192725	0.0179343	0.0160956	0.0131628	0.00714082	0.00336814	-0.0014624	-0.0015574	-0.0028956	-0.0047343	-0.0076671	-0.0136891	-0.0174618	0.014234	0.0124043	0.0113906	0.00336814	0.00398121	0.00936732	0.00883091	0.00702484	0.00502989
480	0.0212876	0.0306447	0.0306824	0.0292525		4.51667	-111.4	-21.8		480	0.000999048	0.000193005	0.000397478		480	0.0210207	0.0194052	0.019194	0.0179975	0.0161006	0.0132224	0.00736837	0.00334541	-0.0016155	-0.0018267	-0.0030232	-0.0049201	-0.0077983	-0.0136523	-0.0176753	0.0141565	0.0123331	0.0115206	0.00334541	0.00399806	0.00919748	0.00860578	0.00677472	0.00490967
479	0.0211829	0.0308363	0.0306841	0.029399		4.53333	-111.8	-21.8		479	0.00100904	0.000186344	0.000367135		479	0.0211073	0.0195422	0.0193579	0.0180247	0.0162037	0.0133136	0.00757079	0.00345254	-0.0015651	-0.0017494	-0.0030826	-0.0049036	-0.0077937	-0.0135365	-0.0176548	0.0139965	0.0122843	0.0117023	0.00345254	0.0041827	0.00925563	0.00888444	0.00695277	0.00510552
478	0.0209171	0.0309612	0.0306069	0.0293947		4.55	-111.6	-21.4		478	0.000988056	0.000214001	0.00050046		478	0.0212233	0.0195613	0.0195478	0.0181741	0.016286	0.0133305	0.0077288	0.00353053	-0.001662	-0.0016755	-0.0030492	-0.0049373	-0.0078928	-0.0134945	-0.0176928	0.013883	0.0123023	0.0117977	0.00353053	0.00434958	0.00928594	0.00907485	0.00707	0.00520766
477	0.0205523	0.0310408	0.0306522	0.0292838		4.56667	-109.8	-21.8		477	0.00100772	0.000220329	0.000501811		477	0.0211216	0.0195867	0.0196148	0.0182904	0.0164354	0.0134469	0.00781843	0.00353118	-0.0015349	-0.0015068	-0.0028312	-0.0046862	-0.0076747	-0.0133032	-0.0175904	0.0137482	0.0120876	0.011881	0.00353118	0.00449617	0.00905442	0.00895649	0.00706936	0.00514011
476	0.0201585	0.0304648	0.0301711	0.0291255		4.58333	-108.8	-23.2		476	0.000969042	0.000171661	0.00038446		476	0.0212027	0.0195783	0.0195697	0.0182392	0.0164412	0.0134157	0.00767772	0.00342538	-0.0016244	-0.001633	-0.0029635	-0.0047615	-0.007787	-0.013525	-0.0177773	0.0135084	0.0119182	0.0120985	0.00342538	0.0045778	0.00898611	0.00892529	0.0070932	0.00511199
475	0.0199948	0.0307414	0.0304114	0.0291561		4.6	-109	-24		475	0.00100739	0.000175327	0.000391453		475	0.0210071	0.0194435	0.0195308	0.018123	0.0163962	0.0132553	0.00755521	0.00340603	-0.0015636	-0.0014763	-0.0028841	-0.0046109	-0.0077518	-0.0134519	-0.0176011	0.0132798	0.0116746	0.0121941	0.00340603	0.00440435	0.00885584	0.00894126	0.00711722	0.00512916
474	0.0197136	0.0308554	0.0305795	0.0292206		4.61667	-111	-23		474	0.00100037	0.000160674	0.000407467		474	0.0211901	0.0193871	0.019616	0.0181373	0.0165856	0.013487	0.00771989	0.00374115	-0.001803	-0.0015741	-0.0030528	-0.0046045	-0.0077031	-0.0134702	-0.0174489	0.0132311	0.0115928	0.0124217	0.00374115	0.00457679	0.00880763	0.00900721	0.00712541	0.00515901
473	0.0195614	0.0304817	0.0303033	0.0291124		4.63333	-111	-19.2		473	0.00103039	0.000144343	0.000417471		473	0.0213029	0.019586	0.0196531	0.0182005	0.0165795	0.0136805	0.00783009	0.00376492	-0.0017169	-0.0016498	-0.0031024	-0.0047234	-0.0076224	-0.0134728	-0.017538	0.013028	0.0114199	0.012624	0.00376492	0.00478401	0.00870608	0.0089904	0.00708995	0.00521221
472	0.0194243	0.0304206	0.0300805	0.02925		4.65	-108.8	-18		472	0.0010547	0.000240336	0.000475804		472	0.0213244	0.0197304	0.0197247	0.0182906	0.0165964	0.0138332	0.00792732	0.00383335	-0.001594	-0.0015997	-0.0030338	-0.004728	-0.0074912	-0.0133971	-0.0174911	0.0129103	0.0113641	0.0127408	0.00383335	0.00496746	0.00856886	0.00897175	0.00704275	0.00524181
471	0.0193183	0.0304473	0.0298551	0.0291785		4.66667	-106.2	-17.6		471	0.00105904	0.000214676	0.000553131		471	0.0213162	0.0197255	0.0197521	0.0182054	0.0165805	0.0137338	0.00789572	0.00388267	-0.0015907	-0.0015641	-0.0031108	-0.0047357	-0.0075824	-0.0134205	-0.0174335	0.0127622	0.0112747	0.0128865	0.00388267	0.00505438	0.00843135	0.00893186	0.0070284	0.00529841
470	0.0188384	0.0303753	0.0300345	0.0289374		4.68333	-103.8	-16		470	0.00101037	0.00023067	0.000488132		470	0.0209349	0.0195384	0.0195268	0.0180124	0.0164402	0.0134829	0.00766883	0.00369804	-0.0013965	-0.0014081	-0.0029225	-0.0044947	-0.007452	-0.0132661	-0.0172369	0.0124479	0.0109311	0.0126663	0.00369804	0.00497641	0.00855527	0.00899329	0.00718713	0.00537717
469	0.0184425	0.0304394	0.0301239	0.0287561		4.7	-105.4	-19.2		469	0.00104871	0.000235677	0.000499467		469	0.0209792	0.0195206	0.0195566	0.0181589	0.016585	0.0136337	0.00789875	0.0039757	-0.0014586	-0.0014226	-0.0028203	-0.0043942	-0.0073455	-0.0130805	-0.0170035	0.0124205	0.0107717	0.0130256	0.0039757	0.00518913	0.00835653	0.00894336	0.00726634	0.00526987
468	0.0182995	0.0304438	0.0301974	0.0287343		4.71667	-113.6	-20.4		468	0.00115472	0.00018699	0.000503132		468	0.021158	0.0194415	0.0195518	0.0181804	0.0166501	0.0137327	0.00801151	0.00418418	-0.0017165	-0.0016062	-0.0029776	-0.0045079	-0.0074253	-0.0131465	-0.0169738	0.0122968	0.0107925	0.0133082	0.00418418	0.00514692	0.00828963	0.0090009	0.00726876	0.00522938
467	0.0179788	0.0299788	0.0301038	0.0287197		4.73333	-116.8	-20.4		467	0.00115372	0.000168661	0.000493467		467	0.0208579	0.0192882	0.0193888	0.0179551	0.0164915	0.0134264	0.00785312	0.00408576	-0.0015697	-0.0014691	-0.0029028	-0.0043664	-0.0074315	-0.0130048	-0.0167721	0.0119365	0.010534	0.0131478	0.00408576	0.00516582	0.00813485	0.00884795	0.00706744	0.00519285
466	0.0176067	0.030204	0.0299231	0.0284702		4.75	-117	-24.6		466	0.00103639	0.000232657	0.000575473		466	0.0207352	0.0192653	0.0193025	0.0178779	0.016351	0.0133893	0.00786373	0.0040011	-0.0014699	-0.0014327	-0.0028573	-0.0043842	-0.0073459	-0.0128715	-0.0167341	0.0118141	0.0103728	0.0132339	0.0040011	0.00530075	0.0080629	0.00876785	0.00711694	0.0051071
465	0.0175377	0.0299345	0.0296761	0.0283789		4.76667	-113	-26.2		465	0.00108671	0.000185669	0.000587791		465	0.0207099	0.0192517	0.0191781	0.0179338	0.016395	0.0133798	0.00794481	0.00416116	-0.0014582	-0.0015318	-0.0027761	-0.0043149	-0.0073301	-0.0127651	-0.0165487	0.0117127	0.0103514	0.0133295	0.00416116	0.00553109	0.00794557	0.00876276	0.00708744	0.00519538
464	0.0171611	0.0292957	0.0294313	0.0281875		4.78333	-106.8	-23.6		464	0.00114905	0.000101666	0.000492463		464	0.0204896	0.0191195	0.0190494	0.0178087	0.0162704	0.013433	0.00798391	0.00418553	-0.0013701	-0.0014402	-0.0026809	-0.0042192	-0.0070566	-0.0125057	-0.0163041	0.0114704	0.0101236	0.0134094	0.00418553	0.00557429	0.00798586	0.00893354	0.00707229	0.0052899
463	0.0167583	0.0294379	0.029381	0.02781		4.8	-109	-21.6		463	0.00114904	0.000148008	0.000417481		463	0.0204545	0.019126	0.0191187	0.0178447	0.0160737	0.0133884	0.00810563	0.00422416	-0.0013285	-0.0013358	-0.0026098	-0.0043808	-0.0070661	-0.0123489	-0.0162303	0.0112172	0.0100885	0.0135302	0.00422416	0.00570944	0.00789526	0.00906283	0.00726113	0.00530164
462	0.0167469	0.0292482	0.0290448	0.0276287		4.81667	-113.8	-18.6		462	0.00107837	0.000208686	0.000436802		462	0.0204374	0.0189432	0.019052	0.0176519	0.0161934	0.013379	0.00815313	0.00421325	-0.0014942	-0.0013854	-0.0027855	-0.004244	-0.0070584	-0.0122843	-0.0162242	0.0111091	0.00990875	0.0136135	0.00421325	0.00586509	0.00764176	0.00889074	0.00714705	0.00512708
461	0.0166703	0.0288418	0.0288604	0.0274289		4.83333	-116.6	-19.4		461	0.00109473	0.000157336	0.000586142		461	0.0203166	0.0187867	0.0188937	0.0174745	0.0161275	0.0134375	0.00813666	0.00421819	-0.0015299	-0.0014229	-0.0028421	-0.0041891	-0.0068791	-0.0121799	-0.0160984	0.0110406	0.00971904	0.0136741	0.00421819	0.00585496	0.0075771	0.00880531	0.00715774	0.00514547
460	0.016557	0.0288245	0.0290881	0.0273831		4.85	-113.6	-20.2		460	0.00112971	0.000145336	0.000560144		460	0.020069	0.0187427	0.0188089	0.0174751	0.0160143	0.0134427	0.00816166	0.00429464	-0.0013263	-0.0012601	-0.0025939	-0.0040547	-0.0066263	-0.0119073	-0.0157744	0.0107657	0.00952407	0.0137289	0.00429464	0.00588477	0.00764558	0.00882786	0.00722462	0.00518574
459	0.0160168	0.0288859	0.0289482	0.0272802		4.86667	-114.8	-20.6		459	0.00116304	0.000161996	0.000516792		459	0.0199901	0.0186276	0.0188624	0.0174861	0.0159719	0.0133898	0.00819082	0.00462371	-0.0013625	-0.0011277	-0.002504	-0.0040182	-0.0066003	-0.0117993	-0.0153664	0.0105973	0.00933412	0.0138263	0.00462371	0.00600456	0.00765625	0.00888234	0.00718845	0.00529493
458	0.0155073	0.028445	0.0286521	0.0269288		4.88333	-116	-23.2		458	0.00116704	0.000138005	0.000562797		458	0.0198741	0.0185502	0.0188639	0.0174724	0.0160558	0.0136134	0.00840639	0.00489965	-0.0013239	-0.0010102	-0.0024017	-0.0038183	-0.0062607	-0.0114677	-0.0149745	0.0106253	0.00931133	0.0139403	0.00489965	0.00613075	0.00748224	0.00885565	0.00721055	0.00532093
457	0.0155697	0.0284223	0.028648	0.0269679		4.9	-118.4	-23.6		457	0.00113303	0.000100682	0.000575145		457	0.0197535	0.018486	0.018684	0.0174526	0.0159707	0.0136159	0.00829461	0.00508138	-0.0012675	-0.0010695	-0.0023009	-0.0037828	-0.0061376	-0.0114589	-0.0146721	0.0104416	0.00928993	0.0140925	0.00508138	0.00633717	0.00745965	0.00878776	0.00715307	0.00529246
456	0.0153034	0.028074	0.0282219	0.026745		4.91667	-122	-26.2		456	0.00112371	0.000131677	0.000580807		456	0.019611	0.0184944	0.0184859	0.0172491	0.0158789	0.0134674	0.00833377	0.00494095	-0.0011166	-0.0011251	-0.0023619	-0.0037321	-0.0061436	-0.0112772	-0.0146701	0.0102166	0.00914338	0.0140758	0.00494095	0.00641783	0.00744197	0.00890964	0.00723094	0.00539529
455	0.0148189	0.0276418	0.0274874	0.0262951		4.93333	-119.8	-26.4		455	0.00117771	0.000143339	0.000568131		455	0.0196756	0.018543	0.0183847	0.0173867	0.0159797	0.013474	0.00856716	0.00521114	-0.0011326	-0.0012909	-0.0022889	-0.0036959	-0.0062016	-0.0111084	-0.0144645	0.0101693	0.00902025	0.0143129	0.00521114	0.00676589	0.00734611	0.00892267	0.00731023	0.00559043
454	0.0147718	0.0273253	0.0272268	0.0260278		4.95	-118.6	-22		454	0.00110838	0.000103007	0.000564793		454	0.0194016	0.0179631	0.0179927	0.0170354	0.0155984	0.0132671	0.00838788	0.00517669	-0.0014385	-0.0014089	-0.0023662	-0.0038032	-0.0061345	-0.0110137	-0.0142249	0.00977695	0.00860075	0.0141742	0.00517669	0.00663613	0.00717926	0.00894997	0.00726194	0.00546197
453	0.0144711	0.0272332	0.0273706	0.0258452		4.96667	-114	-14.8		453	0.00110071	0.000148326	0.000539144		453	0.0191398	0.0176918	0.017935	0.0169682	0.0155683	0.0133045	0.0084412	0.00525264	-0.001448	-0.0012048	-0.0021716	-0.0035715	-0.0058353	-0.0106986	-0.0138872	0.00976923	0.00853081	0.0142454	0.00525264	0.00679427	0.00711896	0.00891339	0.00736169	0.0053986
452	0.0142455	0.0268196	0.0271725	0.0255651		4.98333	-111.6	-10		452	0.00108037	0.000204672	0.000587463		452	0.0189919	0.0174706	0.0179081	0.0168368	0.0154307	0.0133236	0.00863518	0.00544233	-0.0015213	-0.0010838	-0.0021551	-0.0035612	-0.0056683	-0.0103567	-0.0135496	0.00949944	0.00852962	0.0142586	0.00544233	0.00678662	0.00719526	0.00899607	0.00750264	0.00564159
451	0.0139944	0.0262024	0.0265203	0.0252197		5	-116.6	-9		451	0.00103837	0.000124017	0.000541806		451	0.018762	0.0172866	0.0176277	0.0166369	0.0153826	0.0133055	0.00861671	0.00552255	-0.0014754	-0.0011343	-0.0021251	-0.0033794	-0.0054565	-0.0101453	-0.0132394	0.00919624	0.00838144	0.0142101	0.00552255	0.00675229	0.00726173	0.00892156	0.00745365	0.0057302
450	0.0136358	0.0258729	0.0259215	0.0247827		5.01667	-118.8	-8		450	0.00114238	0.000101994	0.000588456		450	0.0184724	0.017078	0.0173186	0.016175	0.0148696	0.0126864	0.00843257	0.00539816	-0.0013944	-0.0011538	-0.0022974	-0.0036028	-0.005786	-0.0100398	-0.0130742	0.00873639	0.00787882	0.0138779	0.00539816	0.00685786	0.00702652	0.0088926	0.00724048	0.00558623
449	0.0136084	0.0257711	0.025543	0.0247148		5.03333	-120	-10		449	0.00110004	7.60059e-05	0.000646809		449	0.0184013	0.0169108	0.0172795	0.0162355	0.0148797	0.0127665	0.00863911	0.00560676	-0.0014905	-0.0011218	-0.0021658	-0.0035216	-0.0056348	-0.00976219	-0.0127945	0.0088457	0.00783752	0.0140791	0.00560676	0.00695665	0.00690933	0.00882912	0.00725696	0.00557437
448	0.0133726	0.0254081	0.0250897	0.0244204		5.05	-120.8	-11.8		448	0.00104371	6.93302e-05	0.000641475		448	0.0181586	0.0168377	0.0172225	0.0160243	0.0148883	0.0127068	0.00879635	0.00583474	-0.0013209	-0.0009361	-0.0021343	-0.0032703	-0.0054518	-0.00936225	-0.0123239	0.00872891	0.00777236	0.0139736	0.00583474	0.00714468	0.00683972	0.00871364	0.00733067	0.00557356
447	0.0131006	0.0250049	0.0249654	0.023916		5.06667	-125	-14		447	0.00102238	0.000116676	0.000631471		447	0.0178768	0.016743	0.0169058	0.0158452	0.0147761	0.0125444	0.00881832	0.00588501	-0.0011338	-0.000971001	-0.0020316	-0.0031007	-0.0053324	-0.00905848	-0.0119918	0.00865958	0.00758871	0.0138782	0.00588501	0.0072181	0.00667703	0.00866697	0.00732766	0.00568049
446	0.0129469	0.0243612	0.024571	0.0234273		5.08333	-124.2	-16.2		446	0.0011317	3.30012e-05	0.000637799		446	0.017763	0.0164212	0.0166193	0.01552	0.014622	0.0124785	0.00873715	0.00600204	-0.0013418	-0.0011437	-0.002243	-0.003141	-0.0052845	-0.00902585	-0.011761	0.00841803	0.00741721	0.0138961	0.00600204	0.00720394	0.0066093	0.00860213	0.00716533	0.00552198
445	0.0125447	0.0242226	0.024519	0.0231748		5.1	-120.4	-18.4		445	0.00116937	-3.06467e-05	0.000649472		445	0.0176443	0.0162919	0.0164431	0.0154256	0.0144552	0.0124687	0.00897576	0.00620887	-0.0013524	-0.0012012	-0.0022187	-0.0031891	-0.0051756	-0.00866854	-0.0114354	0.00814471	0.00734898	0.0139406	0.00620887	0.00738252	0.00668357	0.00866369	0.00723933	0.00561779
444	0.0123086	0.0238291	0.0238008	0.0229911		5.11667	-120	-17.6		444	0.00116238	-1.96695e-05	0.000682801		444	0.0174309	0.0161883	0.016211	0.0153153	0.0142619	0.0124225	0.00900172	0.00646119	-0.0012426	-0.0012199	-0.0021156	-0.003169	-0.0050084	-0.00842918	-0.0109697	0.00798404	0.00721287	0.0138853	0.00646119	0.00750787	0.00663833	0.00868465	0.00720952	0.00560347
443	0.0120706	0.0232026	0.0231273	0.0225165		5.13333	-115.8	-19.2		443	0.00097238	7.39893e-05	0.00061514		443	0.0172456	0.0160035	0.0161763	0.0152935	0.0141949	0.0124145	0.00908675	0.00659037	-0.0012421	-0.0010693	-0.0019521	-0.0030507	-0.0048311	-0.00815885	-0.0106552	0.00798353	0.00717723	0.0139499	0.00659037	0.00766669	0.00656002	0.00863444	0.00721888	0.00558516
442	0.011699	0.0231102	0.0231526	0.0222469		5.15	-116	-25		442	0.00100171	2.46764e-05	0.00061047		442	0.0169918	0.0157191	0.0160395	0.0151218	0.0141226	0.0124319	0.00911691	0.0067665	-0.0012727	-0.0009523	-0.00187	-0.0028692	-0.0045599	-0.00787489	-0.0102253	0.00781399	0.00697075	0.013787	0.0067665	0.00780208	0.00659021	0.00856259	0.00721304	0.00565364
441	0.0116537	0.0229443	0.0227777	0.0220022		5.16667	-114.8	-23.4		441	0.00106504	-3.06566e-05	0.000627478		441	0.0168187	0.0155682	0.0158483	0.0147954	0.01402	0.0123405	0.00919583	0.00704998	-0.0012505	-0.000970401	-0.0020233	-0.0027987	-0.0044782	-0.00762287	-0.00976872	0.00773021	0.0068009	0.0138153	0.00704998	0.00800363	0.00650797	0.00858899	0.0072292	0.00568932
440	0.0115441	0.0224123	0.0224738	0.0218521		5.18333	-115	-20.6		440	0.00106771	-4.53293e-05	0.000605136		440	0.0165262	0.0153473	0.0156475	0.0146152	0.0138194	0.0122882	0.00933988	0.00718463	-0.0011789	-0.000878699	-0.001911	-0.0027068	-0.004238	-0.00718632	-0.00934157	0.00770383	0.00685279	0.0137134	0.00718463	0.00808526	0.00640529	0.00859382	0.00730932	0.00565863
439	0.0111186	0.0220355	0.0222151	0.0212397		5.2	-120	-18.6		439	0.00102372	-3.466e-05	0.000622789		439	0.0163041	0.0150435	0.0154263	0.0144788	0.0137622	0.0121014	0.00938736	0.00727281	-0.0012606	-0.0008778	-0.0018253	-0.0025419	-0.0042027	-0.00691674	-0.00903129	0.00753361	0.00658709	0.0134621	0.00727281	0.00812832	0.00641288	0.00852856	0.00731239	0.00574398
438	0.0111251	0.0215215	0.0216051	0.020906		5.21667	-120	-21.6		438	0.00102338	-7.7337e-05	0.000679463		438	0.0160168	0.0147524	0.0151128	0.0142541	0.0134759	0.012086	0.00937914	0.00735555	-0.0012644	-0.000904	-0.0017627	-0.0025409	-0.0039308	-0.00663766	-0.00866125	0.00738242	0.00653492	0.0133003	0.00735555	0.00806245	0.00631567	0.00827567	0.00724773	0.00561333
437	0.0109807	0.0210142	0.0214492	0.0206741		5.23333	-123.8	-18.6		437	0.000911723	-1.66694e-05	0.000769466		437	0.0156517	0.0145329	0.0147895	0.0139178	0.0131841	0.0121027	0.00939284	0.00759405	-0.0011188	-0.000862199	-0.0017339	-0.0024676	-0.003549	-0.00625886	-0.00805765	0.00694438	0.00631569	0.0131383	0.00759405	0.00807997	0.00628417	0.00842943	0.0072699	0.00578437
436	0.0107075	0.0207775	0.0211144	0.0203027		5.25	-127.6	-19.8		436	0.00093172	-5.9992e-05	0.000736475		436	0.015405	0.0143424	0.0145987	0.0137451	0.0130903	0.0119733	0.00954387	0.00798008	-0.0010626	-0.0008063	-0.0016599	-0.0023147	-0.0034317	-0.00586113	-0.00742492	0.00677033	0.00616027	0.0130306	0.00798008	0.00821219	0.00612625	0.00858869	0.00742014	0.00597824
435	0.0105122	0.0204059	0.0206532	0.0198372		5.26667	-128.6	-23.2		435	0.000956704	-4.49915e-05	0.000686814		435	0.0152554	0.0140698	0.0144387	0.0136026	0.0130329	0.0119299	0.00964618	0.00815429	-0.0011856	-0.0008167	-0.0016528	-0.0022225	-0.0033255	-0.00560922	-0.00710111	0.00682442	0.00607603	0.0129641	0.00815429	0.00832409	0.00595943	0.00836261	0.00735694	0.00584361
434	0.0102787	0.0201298	0.0204127	0.0193332		5.28333	-128.6	-26.2		434	0.000905375	-8.29994e-05	0.000770807		434	0.0151007	0.0139416	0.0143345	0.0134365	0.0127809	0.0117057	0.00968996	0.00827211	-0.0011591	-0.0007662	-0.0016642	-0.0023198	-0.003395	-0.00541074	-0.00682859	0.0066632	0.00605799	0.0127525	0.00827211	0.00842407	0.00605698	0.008414	0.00739077	0.00591912
433	0.0100903	0.0197485	0.0199544	0.0189944		5.3	-127.4	-20.8		433	0.000902047	4.13259e-05	0.000848462		433	0.0146678	0.013842	0.0141492	0.0132885	0.0127835	0.0117337	0.00989689	0.00861663	-0.0008258	-0.0005186	-0.0013793	-0.0018843	-0.0029341	-0.00477091	-0.00605117	0.0065176	0.00591411	0.0127302	0.00861663	0.00849529	0.00607268	0.00842567	0.00738018	0.00600216
432	0.00995817	0.0193983	0.0199551	0.0188657		5.31667	-129	-23.2		432	0.000930031	4.67902e-06	0.000835468		432	0.0145526	0.0135537	0.0139331	0.0131308	0.0127341	0.0116951	0.0100124	0.00877876	-0.000998899	-0.0006195	-0.0014218	-0.0018185	-0.0028575	-0.0045402	-0.00577384	0.00659877	0.00569552	0.0127522	0.00877876	0.00875414	0.00621299	0.00853731	0.00751448	0.00617132
431	0.00989733	0.0189778	0.0196759	0.0186431		5.33333	-128.4	-22.2		431	0.000938376	-2.73287e-05	0.000866472		431	0.0144446	0.0134708	0.0138434	0.0129175	0.0124971	0.0117266	0.0102725	0.00902741	-0.0009738	-0.000601199	-0.0015271	-0.0019475	-0.002718	-0.0041721	-0.00541719	0.00654213	0.00574236	0.0127927	0.00902741	0.0089878	0.00597792	0.00837401	0.00734298	0.00608892
430	0.00943	0.018692	0.0191886	0.0179763		5.35	-125.8	-18.6		430	0.000903378	-3.56733e-05	0.000826806		430	0.014074	0.0131866	0.0136359	0.0126922	0.0122667	0.0115487	0.0102849	0.00917618	-0.0008874	-0.0004381	-0.0013818	-0.0018073	-0.0025253	-0.0037891	-0.00489782	0.00639193	0.00558787	0.0125863	0.00917618	0.00899176	0.00595008	0.00825344	0.00738689	0.00608925
429	0.00919085	0.0182584	0.0186114	0.0177721		5.36667	-124	-18		429	0.000973384	-5.36541e-05	0.000804811		429	0.01395	0.0129773	0.0134432	0.0125572	0.0122514	0.0114956	0.010426	0.0095712	-0.000972699	-0.0005068	-0.0013928	-0.0016986	-0.0024544	-0.003524	-0.0043788	0.00635842	0.00552951	0.0124347	0.0095712	0.00904052	0.00588554	0.00829929	0.00753669	0.0060588
428	0.00920405	0.0179413	0.0181671	0.0177615		5.38333	-120.4	-15		428	0.000989705	-0.000143001	0.000825802		428	0.0139198	0.0130534	0.0133574	0.0127102	0.0122894	0.0116592	0.0106632	0.0100225	-0.000866399	-0.0005624	-0.0012096	-0.0016304	-0.0022606	-0.0032566	-0.0038973	0.00647758	0.00560294	0.0125684	0.0100225	0.00937692	0.00580559	0.00817773	0.00735361	0.00603958
427	0.00898948	0.01756	0.0177641	0.0172276		5.4	-121	-14.6		427	0.00103538	-0.000130663	0.000814467		427	0.0138503	0.012855	0.0132396	0.0126278	0.0122033	0.0117651	0.0108357	0.010256	-0.0009953	-0.0006107	-0.0012225	-0.001647	-0.0020852	-0.0030146	-0.0035943	0.00647087	0.00572601	0.0125881	0.010256	0.00966662	0.00587766	0.00820139	0.00745771	0.00617298
426	0.00880616	0.0169946	0.0174034	0.0168611		5.41667	-121	-18.2		426	0.000949373	-0.000127315	0.000882139		426	0.0136063	0.0125729	0.013091	0.0123985	0.0121024	0.0117719	0.0109269	0.0103187	-0.0010334	-0.0005153	-0.0012078	-0.0015039	-0.0018344	-0.0026794	-0.0032876	0.00611826	0.00555701	0.0123861	0.0103187	0.00972817	0.00596161	0.00837379	0.00758949	0.00638707
425	0.00872488	0.0167449	0.0173299	0.0167798		5.43333	-125.6	-18.6		425	0.000935714	-0.000188331	0.000995815		425	0.0134074	0.0125448	0.0129793	0.0122685	0.0120267	0.0119439	0.0111728	0.0106632	-0.0008626	-0.0004281	-0.0011389	-0.0013807	-0.0014635	-0.0022346	-0.0027442	0.00618435	0.00572814	0.0122473	0.0106632	0.00985664	0.00598507	0.00835895	0.00779865	0.00644337
424	0.00868319	0.0165896	0.0170274	0.0165256		5.45	-125.8	-19.6		424	0.000941714	-0.000196	0.000898152		424	0.0132748	0.0124959	0.0128656	0.0121714	0.0121623	0.0119942	0.0112907	0.0111205	-0.0007789	-0.0004092	-0.0011034	-0.0011125	-0.0012806	-0.0019841	-0.0021543	0.00613196	0.00570611	0.0122568	0.0111205	0.00996251	0.00594901	0.00844873	0.00780061	0.00644765
423	0.00849499	0.016217	0.0164693	0.0161922		5.46667	-123.8	-21.8		423	0.000866373	-0.000133326	0.000852793		423	0.0128364	0.0121322	0.0126091	0.0121291	0.0120134	0.0118535	0.0113791	0.011305	-0.0007042	-0.0002273	-0.0007073	-0.000823	-0.0009829	-0.0014573	-0.0015314	0.00591293	0.00548286	0.0118656	0.011305	0.00989933	0.00607982	0.00868174	0.00791035	0.00670091
422	0.0083867	0.0153968	0.015879	0.0156234		5.48333	-122.6	-22.4		422	0.000854045	-0.000108669	0.000866462		422	0.0126556	0.012003	0.0123296	0.0118277	0.0118647	0.0117273	0.0114501	0.0113624	-0.0006526	-0.000326	-0.0008279	-0.0007909	-0.0009283	-0.0012055	-0.0012932	0.00586165	0.00511874	0.0117231	0.0113624	0.0100512	0.00625726	0.00887145	0.00816187	0.00709473
421	0.0081886	0.0151135	0.0155015	0.0151621		5.5	-122.2	-19.8		421	0.000929713	-0.000175993	0.000903129		421	0.012626	0.0118852	0.0123505	0.0118314	0.0117949	0.0117701	0.0117941	0.0117721	-0.0007408	-0.0002755	-0.0007946	-0.0008311	-0.000855899	-0.0008319	-0.0008539	0.00586656	0.00530926	0.0118001	0.0117721	0.0101638	0.00624962	0.00889579	0.00831769	0.00733839
420	0.00811807	0.015633	0.0154792	0.0150932		5.51667	-120.2	-15.6		420	0.000959714	-0.000264327	0.000744809		420	0.0123731	0.0115966	0.0121843	0.0117629	0.0115707	0.0117899	0.0120423	0.0121841	-0.0007765	-0.0001888	-0.0006102	-0.0008024	-0.0005832	-0.0003308	-0.000189	0.00582241	0.00519511	0.0115739	0.0121841	0.0101909	0.00603401	0.00876496	0.00819371	0.00727448
419	0.00801608	0.0153107	0.0149258	0.0148148		5.53333	-119.8	-14.2		419	0.000929366	-0.000261982	0.000789453		419	0.0122335	0.0113777	0.0120467	0.0115204	0.0115565	0.0119098	0.012113	0.0122081	-0.000855801	-0.0001868	-0.000713101	-0.000677001	-0.000323701	-0.0001205	-2.54e-05	0.00584955	0.00504691	0.0113871	0.0122081	0.0103234	0.00605864	0.00899054	0.00846127	0.00757049
418	0.00797813	0.0147472	0.0146144	0.0146103		5.55	-119.6	-16.6		418	0.000878384	-0.000276009	0.000799805		418	0.0120191	0.0110675	0.0117123	0.011334	0.0113731	0.0119138	0.0120492	0.0122841	-0.000951599	-0.0003068	-0.0006851	-0.000646	-0.0001053	3.01003e-05	0.000265	0.00563058	0.00505034	0.011144	0.0122841	0.0103848	0.00600259	0.00898534	0.0085331	0.00757
417	0.00785961	0.0143774	0.0144836	0.0144163		5.56667	-122.6	-18		417	0.000925372	-0.000269989	0.000749459		417	0.011807	0.0109049	0.0115453	0.0109839	0.0112179	0.0116859	0.0120528	0.0125331	-0.0009021	-0.000261701	-0.0008231	-0.000589101	-0.0001211	0.000245799	0.0007261	0.00542934	0.00490939	0.0110396	0.0125331	0.0103224	0.00604213	0.00908589	0.00861291	0.0076033
416	0.00761084	0.0143129	0.0142902	0.0140239		5.58333	-124.8	-17.4		416	0.000918378	-0.000199	0.000831455		416	0.0116448	0.0109169	0.0114988	0.01089	0.0111479	0.0117358	0.0124554	0.0129401	-0.0007279	-0.000146001	-0.000754801	-0.000496901	9.09995e-05	0.0008106	0.0012953	0.00543273	0.00497063	0.0110072	0.0129401	0.010581	0.00601203	0.00912238	0.00875162	0.00765733
415	0.00752246	0.0135794	0.0139281	0.013676		5.6	-127	-19.4		415	0.000875702	-0.000188013	0.000739485		415	0.0113664	0.0107708	0.011327	0.0107542	0.0112527	0.0118669	0.012877	0.0133211	-0.0005956	-3.93996e-05	-0.0006122	-0.0001137	0.0005005	0.0015106	0.0019547	0.00549907	0.00495825	0.010794	0.0133211	0.0107537	0.00612419	0.0091619	0.00874976	0.0079096
414	0.0074655	0.0133101	0.0139043	0.0135787		5.61667	-127.8	-18.8		414	0.000919372	-0.000251671	0.000789453		414	0.0110617	0.0104483	0.010996	0.0105312	0.0110805	0.01179	0.0128286	0.0135263	-0.0006134	-6.57002e-05	-0.0005305	1.87997e-05	0.0007283	0.0017669	0.0024646	0.00532431	0.00479684	0.0106198	0.0135263	0.0107898	0.0061824	0.00921187	0.00904464	0.00813685
413	0.00746802	0.0130514	0.0135387	0.0133782		5.63333	-123.4	-15		413	0.000923703	-0.00024567	0.000801811		413	0.0108235	0.010163	0.0107266	0.0104936	0.0109067	0.0115991	0.012782	0.0136505	-0.0006605	-9.69004e-05	-0.000329901	8.31997e-05	0.0007756	0.0019585	0.002827	0.00523728	0.00471754	0.0104679	0.0136505	0.0107584	0.00623671	0.00928042	0.00918196	0.00826374
412	0.00734184	0.0126308	0.0132234	0.0130882		5.65	-117.4	-13.4		412	0.000889033	-0.000197669	0.000772466		412	0.0107106	0.0102358	0.0107409	0.0105177	0.0107995	0.0117119	0.012905	0.0139691	-0.000474799	3.03006e-05	-0.0001929	8.89003e-05	0.0010013	0.0021944	0.0032585	0.0053136	0.00476896	0.0104832	0.0139691	0.0109901	0.00626807	0.00937741	0.00916402	0.00818403
411	0.00728339	0.0124275	0.0131067	0.0129598		5.66667	-113	-19		411	0.000838051	-0.000254333	0.000886827		411	0.0107235	0.0101294	0.010791	0.0104289	0.0108962	0.0118059	0.013128	0.0141753	-0.0005941	6.75004e-05	-0.0002946	0.000172701	0.0010824	0.0024045	0.0034518	0.00529614	0.00469315	0.0105015	0.0141753	0.0111623	0.00614417	0.00933357	0.00912371	0.00823046
410	0.00714527	0.0123223	0.0127117	0.0126524		5.68333	-117.8	-21.6		410	0.000948022	-0.000205318	0.000818123		410	0.010504	0.00974892	0.010478	0.0101078	0.0106116	0.0114987	0.0132377	0.0144658	-0.00075508	-2.59997e-05	-0.0003962	0.0001076	0.0009947	0.0027337	0.0039618	0.00510736	0.00452973	0.0100794	0.0144658	0.01109	0.00607735	0.00938121	0.00944437	0.00851119
409	0.00715237	0.0116451	0.012153	0.0123218		5.7	-127.2	-24		409	0.000953029	-0.000203669	0.000782499		409	0.0102834	0.00968624	0.0105231	0.010047	0.0104549	0.0115355	0.0133603	0.0147453	-0.00059716	0.0002397	-0.0002364	0.000171499	0.0012521	0.0030769	0.0044619	0.00507083	0.00448653	0.0100279	0.0147453	0.0110861	0.00611473	0.00941037	0.00957108	0.00862976
408	0.00726417	0.0114055	0.0122251	0.0122406		5.71667	-133	-31		408	0.000944386	-0.000283321	0.000815143		408	0.0100782	0.00950765	0.0102837	0.00985439	0.0104817	0.0114399	0.013303	0.0147975	-0.000570551	0.0002055	-0.00022381	0.0004035	0.0013617	0.0032248	0.0047193	0.00501207	0.00453858	0.00993718	0.0147975	0.011119	0.00621394	0.00950048	0.00968263	0.00870656
407	0.00719202	0.0113358	0.011988	0.0120215		5.73333	-132.4	-32.6		407	0.000928392	-0.000258684	0.000867794		407	0.010107	0.00947332	0.0100901	0.00982495	0.0103874	0.011582	0.0135761	0.0151042	-0.00063368	-1.69007e-05	-0.00028205	0.0002804	0.001475	0.0034691	0.0049972	0.00523625	0.00458594	0.0098436	0.0151042	0.0113663	0.00631155	0.00982642	0.00976891	0.0089623
406	0.00686873	0.0112875	0.011766	0.0115915		5.75	-131.6	-28.6		406	0.000915041	-0.000148992	0.000838448		406	0.0100176	0.00946297	0.0100492	0.00984434	0.0103953	0.0117003	0.0138844	0.0155342	-0.00055463	3.15998e-05	-0.00017326	0.0003777	0.0016827	0.0038668	0.0055166	0.0052763	0.00461196	0.0098458	0.0155342	0.0114991	0.00639551	0.00986295	0.00984144	0.00914086
405	0.00673109	0.0108011	0.0113825	0.0114117		5.76667	-133.2	-27		405	0.000891715	-0.000180006	0.000803798		405	0.00975953	0.00934194	0.00986999	0.00960091	0.0102629	0.0116242	0.0140426	0.0156677	-0.00041759	0.00011046	-0.00015862	0.00050337	0.00186467	0.00428307	0.00590817	0.00498698	0.00446679	0.00974793	0.0156677	0.0114293	0.00640359	0.00974071	0.00991586	0.00914858
404	0.0069856	0.0108816	0.0112138	0.0113909		5.78333	-133.8	-31		404	0.00091671	-0.000191649	0.000811467		404	0.0094848	0.00903603	0.00950821	0.00942714	0.010076	0.0114631	0.0140521	0.015645	-0.00044877	2.34107e-05	-5.766e-05	0.000591201	0.0019783	0.0045673	0.0061602	0.004818	0.00436174	0.009501	0.015645	0.0114035	0.00639169	0.00981543	0.00996244	0.0093401
403	0.00697089	0.0108314	0.0111364	0.0111511		5.8	-132.4	-32.4		403	0.000882357	-9.66588e-05	0.000892808		403	0.00930003	0.00882349	0.0095267	0.00949337	0.0100151	0.0115285	0.0140981	0.0157769	-0.00047654	0.00022667	0.00019334	0.00071507	0.00222847	0.00479807	0.00647687	0.00496584	0.00431907	0.00933212	0.0157769	0.0113964	0.00646762	0.0100897	0.0103161	0.00953428
402	0.00684117	0.0103542	0.0109801	0.0109092		5.81667	-129.6	-29.4		402	0.000855714	-0.000111341	0.000831475		402	0.00927686	0.00872097	0.00963171	0.00945211	0.0103481	0.011662	0.0142543	0.0160645	-0.000555891	0.00035485	0.00017525	0.00107124	0.00238514	0.00497744	0.00678764	0.00479179	0.00442159	0.00927294	0.0160645	0.0115479	0.00643252	0.0101836	0.0106019	0.00963904
401	0.00674673	0.0101596	0.0106365	0.01072		5.83333	-125	-28		401	0.00096636	-6.03198e-05	0.000879794		401	0.00896964	0.00853093	0.00932299	0.00919288	0.0101665	0.0114277	0.0142078	0.0160746	-0.000438711	0.000353349	0.00022324	0.00119686	0.00245806	0.00523816	0.00710496	0.00459089	0.00442302	0.00906472	0.0160746	0.0115213	0.00639118	0.0100828	0.0105568	0.00981034
400	0.0068418	0.0101957	0.0103494	0.0105732		5.85	-118.2	-24		400	0.000982732	-9.76522e-05	0.000992785		400	0.00891997	0.00839398	0.00923847	0.00911099	0.0101231	0.0114278	0.0143598	0.0162967	-0.000525991	0.0003185	0.00019102	0.00120313	0.00250783	0.00543983	0.00737673	0.00469117	0.00431341	0.008923	0.0162967	0.0115059	0.00667897	0.0104382	0.0107095	0.0101097
399	0.00681088	0.00978943	0.0101547	0.0105295		5.86667	-121.6	-19		399	0.000970056	-0.000108679	0.000897139		399	0.00882622	0.00827887	0.00904595	0.0089686	0.00994831	0.0114547	0.0144192	0.016461	-0.00054735	0.00021973	0.00014238	0.00112209	0.00262848	0.00559298	0.00763478	0.00462859	0.00424309	0.00888546	0.016461	0.0114747	0.00675896	0.0105431	0.0109711	0.0103325
398	0.00674211	0.00985013	0.010106	0.0104812		5.88333	-123.6	-19		398	0.000968705	-1.86562e-05	0.000889152		398	0.00879908	0.00826572	0.00928316	0.00891695	0.00992556	0.011646	0.0146726	0.0167337	-0.00053336	0.00048408	0.00011787	0.00112648	0.00284692	0.00587352	0.00793462	0.00468576	0.00432303	0.00873996	0.0167337	0.0115246	0.00662358	0.0105389	0.0109424	0.0104209
397	0.00665334	0.00966773	0.00986773	0.0101334		5.9	-127.2	-16.2		397	0.00106139	6.33802e-06	0.00102745		397	0.00858509	0.00813141	0.00909084	0.0089515	0.00980297	0.0116458	0.0146735	0.0168798	-0.00045368	0.00050575	0.00036641	0.00121788	0.00306071	0.00608841	0.00829471	0.00478327	0.00426597	0.00866516	0.0168798	0.0115658	0.00656848	0.0107621	0.0110209	0.0104352
396	0.00678676	0.00932283	0.00929923	0.00991864		5.91667	-127.6	-19.2		396	0.0010724	-3.00208e-05	0.00105046		396	0.00839328	0.00798919	0.008813	0.0087391	0.00970229	0.0115382	0.0146427	0.0168211	-0.000404091	0.00041972	0.00034582	0.00130901	0.00314492	0.00624942	0.00842782	0.00458358	0.00416187	0.00843672	0.0168211	0.0115154	0.00678949	0.0108859	0.0112987	0.0107449
395	0.00688841	0.00925483	0.00935563	0.0098147		5.93333	-131.2	-26		395	0.00100137	6.33399e-05	0.0010178		395	0.00836064	0.00812452	0.00892451	0.00879311	0.00983625	0.0117571	0.0148504	0.0170542	-0.00023612	0.00056387	0.00043247	0.00147561	0.00339646	0.00648976	0.00869356	0.00480287	0.0044696	0.008492	0.0170542	0.0116406	0.00682548	0.0109201	0.0114133	0.0109512
394	0.00696398	0.00930863	0.00943733	0.00984898		5.95	-127.6	-26.8		394	0.000960718	8.2016e-05	0.0011208		394	0.00812592	0.00784775	0.00878221	0.00862543	0.0097429	0.0115946	0.0147904	0.017199	-0.00027817	0.00065629	0.00049951	0.00161698	0.00346868	0.00666448	0.00907308	0.00473568	0.00431165	0.00821139	0.017199	0.0115262	0.00691913	0.011063	0.0114293	0.0110497
393	0.00684806	0.00897253	0.00916803	0.00980586		5.96667	-121	-24.6		393	0.000959029	0.000174681	0.0011918		393	0.00824867	0.00783763	0.0088717	0.00876105	0.00977515	0.0117244	0.0148958	0.0173691	-0.00041104	0.00062303	0.00051238	0.00152648	0.00347573	0.00664713	0.00912043	0.00466153	0.00423671	0.00810795	0.0173691	0.0115493	0.00678234	0.0110183	0.0115382	0.0111544
392	0.00688306	0.00876483	0.00903593	0.00976656		5.98333	-119.4	-25.4		392	0.00100439	0.000165343	0.00116282		392	0.00816184	0.00784342	0.0088226	0.00875173	0.009758	0.011769	0.0149706	0.0175247	-0.00031842	0.00066076	0.00058989	0.00159616	0.00360716	0.00680876	0.00936286	0.00480873	0.00423721	0.00806914	0.0175247	0.011538	0.00696308	0.0111763	0.0117589	0.0112592
391	0.00669178	0.00850729	0.00889583	0.00953411		6	-117.6	-27.2		391	0.00106938	0.000243982	0.00099046		391	0.00794045	0.00771809	0.00863271	0.00875177	0.00976373	0.011662	0.0150539	0.0174521	-0.00022236	0.00069226	0.00081132	0.00182328	0.00372155	0.00711345	0.00951165	0.00482354	0.00429355	0.00787561	0.0174521	0.011569	0.00704489	0.0113863	0.0119736	0.0115243
390	0.0067174	0.00834496	0.00879607	0.00950016		6.01667	-113.6	-29.2		390	0.00112503	0.000179668	0.00104114		390	0.00799903	0.00774157	0.00860535	0.00871876	0.00984298	0.0116278	0.0151264	0.0176684	-0.00025746	0.00060632	0.00071973	0.00184395	0.00362877	0.00712737	0.00966937	0.00483229	0.00433301	0.00793386	0.0176684	0.0116542	0.00706594	0.0114921	0.012182	0.0117734
389	0.00707499	0.0086117	0.00907663	0.00934086		6.03333	-115.2	-26.2		389	0.00122038	6.00021e-05	0.00111513		389	0.00785474	0.00772536	0.00848783	0.00854507	0.00972963	0.011611	0.015083	0.0177855	-0.00012938	0.00063309	0.00069033	0.00187489	0.00375626	0.00722826	0.00993076	0.00465424	0.00430385	0.00770669	0.0177855	0.0115366	0.00705907	0.0116293	0.012384	0.0120367
388	0.00701805	0.0083803	0.00879696	0.00925042		6.05	-116.4	-23.8		388	0.00104607	0.00025032	0.00120943		388	0.007814	0.00774137	0.00869973	0.00854741	0.00990428	0.0117526	0.0151626	0.0178886	-7.26306e-05	0.00088573	0.00073341	0.00209028	0.0039386	0.0073486	0.0100746	0.00478599	0.00441431	0.00772084	0.0178886	0.0115063	0.00724848	0.0118116	0.0127089	0.0121108
387	0.00720301	0.00861752	0.00888803	0.00941664		6.06667	-115	-20.4		387	0.00107504	0.000277321	0.00129981		387	0.00815554	0.00780257	0.00874165	0.00862777	0.00984385	0.0119212	0.0152831	0.0179305	-0.00035297	0.00058611	0.00047223	0.00168831	0.00376566	0.00712756	0.00977496	0.00494964	0.00455965	0.007758	0.0179305	0.0113833	0.00718851	0.0117598	0.012686	0.0122877
386	0.007021	0.00876168	0.00900823	0.00917082		6.08333	-116.4	-16.6		386	0.00113272	0.000265678	0.00118513		386	0.00802057	0.00771568	0.00866504	0.00866222	0.00961656	0.0118929	0.0153624	0.0179831	-0.000304889	0.000644471	0.000641651	0.00159599	0.00387233	0.00734183	0.00996253	0.00501038	0.00465246	0.00761276	0.0179831	0.0111524	0.00719924	0.0117604	0.0126304	0.0124173
385	0.00703945	0.00849772	0.00849588	0.00895263		6.1	-116.6	-15.6		385	0.0011317	0.000332693	0.00124213		385	0.00786785	0.00745689	0.00841736	0.00848268	0.00960678	0.0116419	0.0153243	0.0180175	-0.000410961	0.000549509	0.000614829	0.00173893	0.00377405	0.00745645	0.0101496	0.00493382	0.00453571	0.00733564	0.0180175	0.0110624	0.00716192	0.0118928	0.0128151	0.0125422
384	0.00718447	0.00867057	0.00837578	0.0090066		6.11667	-117	-15.4		384	0.00115203	0.000431001	0.00125749		384	0.00757768	0.0073655	0.00825256	0.00828321	0.00960771	0.0114684	0.015211	0.0177287	-0.00021218	0.00067488	0.00070553	0.00203003	0.00389072	0.00763332	0.010151	0.00477514	0.00453975	0.00710885	0.0177287	0.0110853	0.00714234	0.0119486	0.0128682	0.0125809
383	0.00715444	0.00835654	0.00836628	0.0089125		6.13333	-113.4	-18.2		383	0.00119073	0.000571986	0.00121781		383	0.00759217	0.00746049	0.00828944	0.0083711	0.00973933	0.0116367	0.0153007	0.017784	-0.00013168	0.00069727	0.00077893	0.00214716	0.00404453	0.00770853	0.0101918	0.00493289	0.00447475	0.00718859	0.017784	0.0109306	0.00728529	0.0119742	0.0130077	0.0125931
382	0.00704565	0.0080358	0.00832939	0.00878908		6.15	-115.6	-24.4		382	0.00109836	0.000609656	0.00130346		382	0.00756932	0.00740191	0.00821504	0.00845871	0.00961735	0.0117995	0.0153403	0.0178283	-0.00016741	0.00064572	0.00088939	0.00204803	0.00423018	0.00777098	0.010259	0.00510114	0.00455486	0.00716234	0.0178283	0.0108532	0.00737537	0.0120873	0.0131823	0.0127638
381	0.00727058	0.00815548	0.00837204	0.00876406		6.16667	-117.2	-28		381	0.00106471	0.000620345	0.00127746		381	0.00765137	0.00740105	0.00826727	0.00847401	0.00969871	0.0117931	0.0153704	0.0178989	-0.00025032	0.0006159	0.00082264	0.00204734	0.00414173	0.00771903	0.0102475	0.0051067	0.0047809	0.00719564	0.0178989	0.0108954	0.00749687	0.0122739	0.0132327	0.0130894
380	0.00752381	0.00797581	0.00842045	0.0087722		6.18333	-113.2	-29.6		380	0.00115471	0.000589987	0.0012655		380	0.0076525	0.00750189	0.0084035	0.00837674	0.00989529	0.0117319	0.0153875	0.0178437	-0.00015061	0.000750999	0.00072424	0.00224279	0.0040794	0.007735	0.0101912	0.0052486	0.00477945	0.00711073	0.0178437	0.010728	0.00762353	0.0124524	0.0134094	0.0131736
379	0.00753446	0.00795829	0.00849137	0.00866768		6.2	-110.4	-30.8		379	0.00121706	0.000572006	0.00144212		379	0.00754151	0.00740494	0.0084016	0.00832142	0.00958324	0.011754	0.0152933	0.0176543	-0.00013657	0.00086009	0.00077991	0.00204173	0.00421249	0.00775179	0.0101128	0.00522805	0.00467143	0.00687031	0.0176543	0.0105155	0.0076771	0.0126603	0.0136228	0.0133124
378	0.00772373	0.00755142	0.00792645	0.00867332		6.21667	-112.2	-30.2		378	0.00122872	0.000586331	0.00145182		378	0.00755129	0.00732532	0.00840703	0.00843501	0.00972995	0.0118002	0.0152807	0.0175267	-0.00022597	0.00085574	0.00088372	0.00217866	0.00424891	0.00772941	0.00997541	0.00525084	0.00465448	0.00678676	0.0175267	0.0105852	0.00780732	0.012668	0.0135086	0.0134796
377	0.00777253	0.00769457	0.00783136	0.00882419		6.23333	-118.4	-29.6		377	0.00126571	0.000658313	0.00136647		377	0.00770122	0.00759688	0.00853178	0.0087031	0.0100237	0.0118669	0.0153721	0.0178056	-0.00010434	0.00083056	0.00100188	0.00232248	0.00416568	0.00767088	0.0101044	0.0055433	0.0048554	0.00700185	0.0178056	0.0107679	0.00791431	0.0125392	0.0135786	0.0133797
376	0.00759264	0.00802362	0.00823044	0.00868954		6.25	-120.2	-34.6		376	0.0012767	0.000812352	0.00133249		376	0.00753998	0.0075437	0.00844956	0.00867792	0.00987953	0.0117296	0.0153434	0.017747	3.7197e-06	0.00090958	0.00113794	0.00233955	0.00418962	0.00780342	0.010207	0.0054492	0.00493259	0.0067949	0.017747	0.0104932	0.00792294	0.0126197	0.0136044	0.0133622
375	0.00735393	0.00783581	0.00813778	0.0084097		6.26667	-118.8	-32		375	0.0012527	0.000844677	0.00141014		375	0.00753735	0.00747057	0.00825905	0.00842467	0.00975234	0.0116652	0.0151544	0.0175622	-6.678e-05	0.0007217	0.00088732	0.00221499	0.00412785	0.00761705	0.0100248	0.00547591	0.00490731	0.0064607	0.0175622	0.0102642	0.00794347	0.0128146	0.0136195	0.013247
374	0.0075477	0.00748983	0.0075718	0.00840368		6.28333	-117.2	-33		374	0.00133837	0.000843346	0.00153217		374	0.00758227	0.00726967	0.00822947	0.00835807	0.00954014	0.0117302	0.0150055	0.0173967	-0.0003126	0.0006472	0.0007758	0.00195787	0.00414793	0.00742323	0.00981443	0.00544075	0.00507956	0.00649267	0.0173967	0.0101278	0.00798723	0.0127576	0.0137933	0.0131907
373	0.00779691	0.00764379	0.00762424	0.00853881		6.3	-117.4	-33.8		373	0.00123838	0.000915666	0.00158581		373	0.00738531	0.00711851	0.00813777	0.00811164	0.00945259	0.0115389	0.014778	0.0169979	-0.0002668	0.00075246	0.00072633	0.00206728	0.00415359	0.00739269	0.00961259	0.00534251	0.0048473	0.00650423	0.0169979	0.00987892	0.00817738	0.0128798	0.0139773	0.0135304
372	0.00800334	0.00770336	0.00805986	0.00865115		6.31667	-120.8	-23.8		372	0.00120504	0.000842989	0.00152279		372	0.00729662	0.00714272	0.00815125	0.00809376	0.00956376	0.0115599	0.014813	0.0168777	-0.0001539	0.00085463	0.00079714	0.00226714	0.00426328	0.00751638	0.00958108	0.00542514	0.0048412	0.00648402	0.0168777	0.00972075	0.00815789	0.0129413	0.0139188	0.0136235
371	0.00798224	0.00760049	0.00778218	0.00834773		6.33333	-122.2	-20.8		371	0.00128703	0.000894368	0.00148315		371	0.0074244	0.00735178	0.0082841	0.0082745	0.00973272	0.0116445	0.0148116	0.0170985	-7.26203e-05	0.0008597	0.0008501	0.00230832	0.0042201	0.0073872	0.0096741	0.00557769	0.00509831	0.00668125	0.0170985	0.00982461	0.00804272	0.0128134	0.0136344	0.0134215
370	0.00793953	0.00762923	0.00794991	0.00884673		6.35	-122	-24.8		370	0.00131672	0.00113231	0.00149811		370	0.00753537	0.00721443	0.00821359	0.0081585	0.00950747	0.0113745	0.0146883	0.0170307	-0.00032094	0.00067822	0.00062313	0.0019721	0.00383913	0.00715293	0.00949533	0.00567316	0.00529752	0.0063206	0.0170307	0.00951884	0.00828169	0.0125326	0.0135491	0.013315
369	0.00816892	0.00777826	0.00785096	0.00880333		6.36667	-121.2	-30.6		369	0.00129208	0.00111932	0.00159447		369	0.00758518	0.0073811	0.00821209	0.00814575	0.00946071	0.0114375	0.0146737	0.016878	-0.00020408	0.00062691	0.00056057	0.00187553	0.00385232	0.00708852	0.00929282	0.00583565	0.00522651	0.00643268	0.016878	0.00948388	0.00821925	0.0124424	0.0134838	0.0132443
368	0.00827318	0.0076448	0.00800765	0.00871685		6.38333	-125.4	-33.4		368	0.00130404	0.00102965	0.00159145		368	0.00763408	0.00737757	0.00820181	0.00820321	0.00949448	0.0115553	0.0145296	0.0168519	-0.00025651	0.00056773	0.00056913	0.0018604	0.00392122	0.00689552	0.00921782	0.00604678	0.00542089	0.00634521	0.0168519	0.00946833	0.00805591	0.0125071	0.013386	0.0131386
367	0.00844831	0.00774422	0.00826168	0.00863236		6.4	-128.4	-35.6		367	0.00141071	0.00100235	0.00177082		367	0.00751931	0.00726937	0.00828103	0.00826809	0.0095221	0.0112714	0.0143842	0.0167274	-0.00024994	0.00076172	0.00074878	0.00200279	0.00375209	0.00686489	0.00920809	0.00600655	0.00545437	0.0062187	0.0167274	0.00934386	0.00831339	0.0127521	0.0135726	0.013274
366	0.00845229	0.00765062	0.0079704	0.00842618		6.41667	-127.8	-36.4		366	0.00141204	0.00103201	0.00169679		366	0.00739076	0.0071452	0.00835284	0.00819184	0.00939141	0.0109421	0.0142119	0.0163134	-0.00024556	0.00096208	0.00080108	0.00200065	0.00355134	0.00682114	0.00892264	0.00598206	0.0052978	0.00611933	0.0163134	0.00909774	0.00825255	0.0126849	0.0136919	0.0132723
365	0.00862415	0.00721821	0.00764236	0.00863812		6.43333	-127.2	-34.8		365	0.00150038	0.001031	0.00158945		365	0.00750757	0.00713896	0.0082265	0.00816062	0.00933744	0.0111511	0.0141621	0.016187	-0.00036861	0.00071893	0.00065305	0.00182987	0.00364353	0.00665453	0.00867943	0.00607894	0.00523068	0.0061414	0.016187	0.00897111	0.00837409	0.0126316	0.0137745	0.0134117
364	0.00827071	0.00762282	0.00765964	0.00848286		6.45	-124	-37.4		364	0.00141036	0.00110936	0.00176546		364	0.00755451	0.0070743	0.00817055	0.00814791	0.00926824	0.0110989	0.0140498	0.0159366	-0.00048021	0.00061604	0.0005934	0.00171373	0.00354439	0.00649529	0.00838209	0.0061255	0.00533061	0.00608609	0.0159366	0.00860972	0.0085723	0.0127533	0.0138896	0.0135375
363	0.00834882	0.00748253	0.00773365	0.00845548		6.46667	-119.6	-35.6		363	0.0013677	0.00120401	0.00167881		363	0.00764048	0.00710461	0.00826264	0.00820707	0.00938615	0.0111623	0.014005	0.015833	-0.00053587	0.00062216	0.00056659	0.00174567	0.00352182	0.00636452	0.00819252	0.00636818	0.00550418	0.00619064	0.015833	0.008624	0.00872354	0.0127898	0.0138268	0.0135289
362	0.00847355	0.00741202	0.00778408	0.00842059		6.48333	-108.4	-31		362	0.00144304	0.00116499	0.00169413		362	0.00740133	0.00698122	0.00812143	0.00809493	0.00919685	0.0107376	0.0134196	0.0154678	-0.00042011	0.0007201	0.0006936	0.00179552	0.00333627	0.00601827	0.00806647	0.00608585	0.00523181	0.00598917	0.0154678	0.00829803	0.00875686	0.0126818	0.0137399	0.0134639
361	0.00859255	0.0070699	0.00773229	0.00849573		6.5	-89.6	-27.8		361	0.0014767	0.00114433	0.00175781		361	0.00759948	0.00715583	0.0081127	0.00805699	0.00913607	0.0107839	0.0133951	0.0154449	-0.00044365	0.00051322	0.00045751	0.00153659	0.00318442	0.00579562	0.00784542	0.00621115	0.00531061	0.00597123	0.0154449	0.00831041	0.00875393	0.0127049	0.0137749	0.0133246
360	0.00879842	0.00753515	0.00793138	0.00854075		6.51667	-61.8	-23.6		360	0.00149905	0.00120099	0.00179047		360	0.00769354	0.00726995	0.00818504	0.00817519	0.00913591	0.010942	0.0133326	0.0154922	-0.00042359	0.0004915	0.00048165	0.00144237	0.00324846	0.00563906	0.00779866	0.00628661	0.00544629	0.00613233	0.0154922	0.00832751	0.00877094	0.0127172	0.0136627	0.0132069
359	0.00883873	0.0073923	0.00766713	0.00861456		6.53333	-14.2	-20.6		359	0.0015877	0.001326	0.00176216		359	0.00740503	0.00714547	0.00798326	0.00801001	0.0090697	0.0105925	0.0132793	0.0151359	-0.00025956	0.00057823	0.00060498	0.00166467	0.00318747	0.00587427	0.00773087	0.00607098	0.00544661	0.00607244	0.0151359	0.00800541	0.00883835	0.0128101	0.013632	0.0133283
358	0.00877478	0.00710494	0.00746227	0.00838519		6.55	51.8	-15.4		358	0.00154337	0.00154833	0.00183647		358	0.00744083	0.00698966	0.00796817	0.00801472	0.00895895	0.0105701	0.013154	0.0148689	-0.00045117	0.00052734	0.00057389	0.00151812	0.00312927	0.00571317	0.00742807	0.00616265	0.00552101	0.00593538	0.0148689	0.00784466	0.0088873	0.0127293	0.0137461	0.0132297
357	0.00877088	0.00739248	0.00753295	0.00826121		6.56667	150.4	-14.6		357	0.00145436	0.00147667	0.00193949		357	0.0075421	0.00708938	0.00799205	0.00796942	0.00904052	0.0106151	0.013006	0.0146378	-0.00045272	0.00044995	0.000427321	0.00149842	0.003073	0.0054639	0.0070957	0.00636687	0.00556346	0.00586	0.0146378	0.00778487	0.00900488	0.0127526	0.0137294	0.0132676
356	0.00881382	0.00734948	0.00758807	0.00828085		6.58333	266.4	-8.6		356	0.0015754	0.00148865	0.00199714		356	0.00744495	0.00712379	0.00806384	0.00797063	0.0090188	0.0105795	0.0129387	0.0145153	-0.00032116	0.00061889	0.00052568	0.00157385	0.00313455	0.00549375	0.00707035	0.00641783	0.00550785	0.00594421	0.0145153	0.00758443	0.00921231	0.0128001	0.0137566	0.0132705
355	0.00864442	0.0071037	0.00760084	0.00843025		6.6	392.2	6		355	0.00166971	0.00166134	0.00192913		355	0.00778214	0.00718165	0.00811226	0.0079633	0.00902886	0.0105293	0.0128651	0.0144877	-0.00060049	0.00033012	0.00018116	0.00124672	0.00274716	0.00508296	0.00670556	0.00650778	0.00553378	0.00594815	0.0144877	0.0075674	0.00928454	0.0129152	0.0137483	0.0133378
354	0.00886872	0.00739046	0.00765566	0.00852433		6.61667	501.4	14.2		354	0.00159839	0.00174934	0.00183947		354	0.00777406	0.00730535	0.00803345	0.00793988	0.00895077	0.0106251	0.0126543	0.0143379	-0.00046871	0.00025939	0.00016582	0.00117671	0.00285104	0.00488024	0.00656384	0.00665342	0.00567091	0.00591037	0.0143379	0.0074947	0.0092686	0.0127381	0.0135255	0.0130543
353	0.00905095	0.00781942	0.00785149	0.00839147		6.63333	569	10.6		353	0.00161838	0.00170034	0.00201083		353	0.00795455	0.00734774	0.00810496	0.00814171	0.00908613	0.0105129	0.0127175	0.0142384	-0.00060681	0.00015041	0.00018716	0.00113158	0.00255835	0.00476295	0.00628385	0.00703668	0.00592869	0.00599119	0.0142384	0.00743115	0.00935522	0.0126393	0.0135198	0.0129565
352	0.00879846	0.00756948	0.00762395	0.00823951		6.65	570.2	7.6		352	0.00164373	0.00178601	0.00190313		352	0.00805219	0.00747039	0.00821892	0.00823019	0.0092844	0.010508	0.012766	0.0141212	-0.0005818	0.00016673	0.000178	0.00123221	0.00245581	0.00471381	0.00606901	0.0070093	0.00595694	0.00607918	0.0141212	0.0074118	0.00920467	0.0127197	0.0134119	0.0130182
351	0.00903936	0.00723152	0.00745835	0.0083012		6.66667	512	6.6		351	0.00179238	0.001677	0.00190881		351	0.00792984	0.00738171	0.00822147	0.00808225	0.00915199	0.0104119	0.012507	0.0138221	-0.00054813	0.00029163	0.00015241	0.00122215	0.00248206	0.00457716	0.00589226	0.00669189	0.00587962	0.00609153	0.0138221	0.00728983	0.00929052	0.0128061	0.0135322	0.0130748
350	0.00881143	0.00713963	0.00764711	0.00813842		6.68333	411.8	1.6		350	0.00187903	0.001586	0.00204713		350	0.00771005	0.00728088	0.00813682	0.0078795	0.0088848	0.0102692	0.0120958	0.0135991	-0.00042917	0.00042677	0.00016945	0.00117475	0.00255915	0.00438575	0.00588905	0.00668539	0.00568667	0.00597129	0.0135991	0.00708311	0.00951002	0.0127193	0.0134155	0.0129257
349	0.00886023	0.00704389	0.00722445	0.008101		6.7	292.8	-7		349	0.00172604	0.00174665	0.00184414		349	0.00769461	0.00713187	0.00811268	0.00793945	0.00871602	0.0101447	0.0118813	0.0132968	-0.00056274	0.00041807	0.000244841	0.00102141	0.00245009	0.00418669	0.00560219	0.00682529	0.00557045	0.00593389	0.0132968	0.00694889	0.00959445	0.0126445	0.013301	0.0128079
348	0.00891514	0.00713809	0.00716796	0.00814886		6.71667	175.2	-13.2		348	0.00177269	0.00179368	0.00187682		348	0.00786163	0.00722811	0.00818156	0.00807602	0.00884905	0.0101823	0.0118548	0.0131949	-0.00063352	0.00031993	0.00021439	0.00098742	0.00232067	0.00399317	0.00533327	0.00696754	0.00564412	0.00601131	0.0131949	0.00692244	0.0097192	0.0127304	0.0133686	0.0127828
347	0.00874028	0.00740115	0.00731248	0.00815408		6.73333	75.2	-15.2		347	0.00171803	0.00190469	0.0020218		347	0.00777931	0.00731263	0.00819542	0.00810168	0.00893076	0.010059	0.0116861	0.01314	-0.00046668	0.00041611	0.00032237	0.00115145	0.00227969	0.00390679	0.00536069	0.00707044	0.0057106	0.00607991	0.01314	0.0067595	0.00968227	0.0126762	0.0133358	0.0127466
346	0.00849919	0.00723086	0.00717396	0.00801038		6.75	2.6	-20		346	0.00190404	0.00186235	0.00207779		346	0.00775024	0.00715539	0.00810482	0.00784307	0.00875102	0.00979577	0.0114295	0.0127469	-0.00059485	0.00035458	9.28296e-05	0.00100078	0.00204553	0.00367926	0.00499666	0.0068142	0.00571122	0.00605358	0.0127469	0.00657979	0.00967899	0.0126905	0.0133309	0.0128181
345	0.00844063	0.00721946	0.00730018	0.00777921		6.76667	-46.8	-23.2		345	0.0018737	0.00188098	0.00201945		345	0.00787153	0.00735477	0.00826582	0.00800508	0.00884477	0.00972354	0.0115338	0.0127053	-0.00051676	0.00039429	0.00013355	0.00097324	0.00185201	0.00366227	0.00483377	0.00685877	0.00568512	0.0061983	0.0127053	0.00668042	0.00982486	0.0126506	0.0133983	0.0128036
344	0.00888172	0.00718412	0.00738333	0.00796182		6.78333	-73.4	-24.2		344	0.00165571	0.00206035	0.00213215		344	0.00776986	0.00735189	0.00821041	0.00811433	0.00880044	0.00977046	0.0114137	0.0125066	-0.00041797	0.000440551	0.00034447	0.00103058	0.0020006	0.00364384	0.00473674	0.00689601	0.00560997	0.00621523	0.0125066	0.00634642	0.0100511	0.0126406	0.0133823	0.0128291
343	0.00894362	0.00725296	0.00754145	0.00809217		6.8	-90.8	-27.2		343	0.00171537	0.00230199	0.00215879		343	0.00769558	0.00731188	0.00823393	0.00807099	0.00862198	0.00968541	0.011321	0.0124211	-0.0003837	0.00053835	0.000375411	0.000926401	0.00198983	0.00362542	0.00472552	0.00700403	0.00560017	0.00624719	0.0124211	0.0063853	0.0102041	0.0127394	0.0133074	0.0127463
342	0.00888506	0.00720847	0.00742064	0.00795412		6.81667	-100.4	-29.4		342	0.00190941	0.002104	0.00205748		342	0.00773868	0.00732899	0.00824373	0.0079186	0.00863671	0.00972346	0.0111804	0.012272	-0.00040969	0.00050505	0.00017992	0.00089803	0.00198478	0.00344172	0.00453332	0.00694097	0.0058054	0.00623685	0.012272	0.00640657	0.0102749	0.0127459	0.0133239	0.0127288
341	0.00877748	0.00713625	0.00765008	0.00793002		6.83333	-106	-28.8		341	0.00188137	0.00207202	0.00225946		341	0.00773862	0.00722095	0.00812876	0.00777563	0.00862568	0.00969952	0.0108917	0.0119836	-0.00051767	0.00039014	3.70098e-05	0.00088706	0.0019609	0.00315308	0.00424498	0.00694165	0.00565604	0.00622392	0.0119836	0.00632173	0.0102641	0.0127122	0.0131787	0.0126644
340	0.00844808	0.00735453	0.00742764	0.00766941		6.85	-113	-30.4		340	0.00201238	0.00226333	0.00227214		340	0.00773074	0.00711894	0.00796409	0.00758917	0.00835317	0.00930517	0.0107722	0.0117601	-0.0006118	0.00023335	-0.00014157	0.00062243	0.00157443	0.00304146	0.00402936	0.00682293	0.00549787	0.00592916	0.0117601	0.00602073	0.0104602	0.0129582	0.0132394	0.0128831
339	0.00828016	0.00716268	0.00705957	0.00750366		6.86667	-117.2	-33.2		339	0.00213503	0.00198966	0.00230482		339	0.00781835	0.00710386	0.00799872	0.00768975	0.00809992	0.00923022	0.0105952	0.0116992	-0.00071449	0.00018037	-0.0001286	0.00028157	0.00141187	0.00277685	0.00388085	0.006985	0.00544259	0.00601255	0.0116992	0.00601253	0.0104725	0.0128405	0.0132089	0.012773
338	0.0081468	0.00673574	0.00687621	0.00754388		6.88333	-120	-33.8		338	0.00195437	0.00229434	0.00228746		338	0.00769253	0.00701482	0.00781249	0.00756818	0.00805882	0.00912623	0.0103307	0.0115644	-0.00067771	0.00011996	-0.00012435	0.00036629	0.0014337	0.00263817	0.00387187	0.00689492	0.00549719	0.00595593	0.0115644	0.00579855	0.0105823	0.012879	0.0132141	0.0127223
337	0.00821381	0.00690555	0.00686225	0.00757662		6.9	-122.4	-29.8		337	0.00195971	0.00224932	0.00228881		337	0.00763757	0.00699368	0.00779461	0.00747463	0.00809695	0.00903698	0.0103645	0.0112866	-0.00064389	0.00015704	-0.00016294	0.00045938	0.00139941	0.00272693	0.00364903	0.00679741	0.00549646	0.00606555	0.0112866	0.00578253	0.0107302	0.0129214	0.0133055	0.0126506
336	0.0080639	0.00683261	0.0068907	0.00729434		6.91667	-123.2	-32.4		336	0.00201671	0.00214664	0.00247615		336	0.00772833	0.00705392	0.00781556	0.00742959	0.00803332	0.00910689	0.0103276	0.0112942	-0.00067441	8.72305e-05	-0.00029874	0.00030499	0.00137856	0.00259927	0.00356587	0.00683976	0.00538503	0.00605389	0.0112942	0.00569579	0.0105755	0.0126244	0.013077	0.0124046
335	0.00790163	0.00676318	0.00695842	0.00730567		6.93333	-123	-38.2		335	0.0020947	0.00239068	0.00242781		335	0.00786634	0.00714169	0.00786981	0.00763186	0.00814037	0.00918341	0.0102749	0.0111927	-0.00072465	3.47011e-06	-0.00023448	0.00027403	0.00131707	0.00240856	0.00332636	0.00696008	0.00553135	0.00613422	0.0111927	0.0057623	0.0106831	0.0127543	0.0132046	0.0126029
334	0.00780738	0.00664391	0.00693507	0.00720749		6.95	-117	-37.8		334	0.00221573	0.00222367	0.0023858		334	0.00785446	0.00714981	0.00793437	0.00761301	0.00815182	0.00911291	0.0102272	0.0110501	-0.00070465	7.99103e-05	-0.00024145	0.00029736	0.00125845	0.00237274	0.00319564	0.00698669	0.00559526	0.00616922	0.0110501	0.00563408	0.0109816	0.0129678	0.0133549	0.0128422
333	0.00790853	0.00663459	0.0067696	0.00724043		6.96667	-113.6	-34.6		333	0.00199035	0.00249136	0.00234182		333	0.00766471	0.0070603	0.00772615	0.00732626	0.008006	0.00888037	0.0101326	0.0109257	-0.00060441	6.14403e-05	-0.00033845	0.00034129	0.00121566	0.00246789	0.00326099	0.0069852	0.00540925	0.00609852	0.0109257	0.0054755	0.0110383	0.0128027	0.0132497	0.0126928
332	0.00796196	0.00650279	0.00679228	0.00709754		6.98333	-114	-34.2		332	0.00199671	0.00246469	0.00251548		332	0.00749339	0.00704959	0.00768964	0.00723376	0.00799881	0.00880714	0.00999108	0.0108543	-0.0004438	0.00019625	-0.00025963	0.00050542	0.00131375	0.00249769	0.00336091	0.00684073	0.00533991	0.0060704	0.0108543	0.00532322	0.0112182	0.0128659	0.0133163	0.0125922
331	0.00761622	0.00617635	0.00663126	0.00688582		7	-112.4	-32		331	0.00222203	0.00239301	0.00259681		331	0.0076774	0.00705868	0.00789887	0.0073006	0.00795771	0.00871656	0.00980675	0.0107869	-0.00061872	0.00022147	-0.0003768	0.00028031	0.00103916	0.00212935	0.0031095	0.00683663	0.00539483	0.00617597	0.0107869	0.00524825	0.0113442	0.0129386	0.0135533	0.0124574
330	0.00758995	0.00598165	0.0064134	0.00701637		7.01667	-111.4	-31.2		330	0.00229405	0.00232665	0.00260847		330	0.00776127	0.00690369	0.00773272	0.00721876	0.00796147	0.00863208	0.00962902	0.0105618	-0.00085758	-2.85497e-05	-0.00054251	0.0002002	0.00087081	0.00186775	0.00280053	0.00664057	0.00518552	0.00605868	0.0105618	0.0050458	0.0113732	0.0129704	0.0133771	0.0125707
329	0.00771755	0.00628872	0.00641423	0.00702354		7.03333	-107.8	-27.4		329	0.00227738	0.00246203	0.00254847		329	0.00763319	0.00696176	0.00772096	0.00719745	0.00800832	0.00884367	0.00957146	0.0105565	-0.00067143	8.77697e-05	-0.00043574	0.00037513	0.00121048	0.00193827	0.00292331	0.00661712	0.00524183	0.00589976	0.0105565	0.0050542	0.0115252	0.0130345	0.0132588	0.0127229
328	0.00764244	0.00630862	0.00653397	0.00689693		7.05	-107	-28		328	0.00233908	0.00252199	0.00246184		328	0.00738834	0.00673121	0.00745465	0.00719753	0.00778079	0.00855243	0.00939108	0.010378	-0.00065713	6.63102e-05	-0.00019081	0.00039245	0.00116409	0.00200274	0.00298966	0.00639645	0.0051881	0.00589669	0.010378	0.00490575	0.0117088	0.0131908	0.0135376	0.012931
327	0.00762454	0.00612182	0.00609866	0.00680227		7.06667	-109	-25.4		327	0.0023657	0.002412	0.00240843		327	0.0075594	0.00686724	0.00746144	0.00734584	0.00779259	0.00866041	0.00965228	0.0103689	-0.00069216	-9.79602e-05	-0.00021356	0.00023319	0.00110101	0.00209288	0.0028095	0.0065269	0.00518725	0.00603322	0.0103689	0.00498449	0.0117778	0.0133527	0.0135169	0.0128399
326	0.00752787	0.00613833	0.00600048	0.00682987		7.08333	-112.6	-24.4		326	0.00238235	0.00241534	0.0024618		326	0.00767226	0.00690753	0.00781002	0.00750661	0.00782886	0.00858274	0.00975632	0.0104886	-0.00076473	0.00013776	-0.00016565	0.0001566	0.00091048	0.00208406	0.00281634	0.00689722	0.00541758	0.00606783	0.0104886	0.005064	0.0118396	0.0133971	0.0136065	0.0128248
325	0.00711655	0.00587426	0.00614285	0.00655597		7.1	-114.6	-25.6		325	0.00256903	0.00240533	0.00263179		325	0.00754192	0.00676833	0.00776777	0.00728051	0.00767831	0.00830372	0.00954739	0.0104733	-0.00077359	0.00022585	-0.00026141	0.00013639	0.0007618	0.00200547	0.00293138	0.0068108	0.00524587	0.00593752	0.0104733	0.00471734	0.0119788	0.0134528	0.0136751	0.0130251
324	0.00714403	0.0058549	0.00627352	0.00640626		7.11667	-117.2	-28.6		324	0.00257908	0.00262197	0.00255176		324	0.00741202	0.00676936	0.00770859	0.00709596	0.00756009	0.0082755	0.0094815	0.0103844	-0.00064266	0.00029657	-0.00031606	0.00014807	0.000863479	0.00206948	0.00297238	0.00665058	0.00515327	0.00593377	0.0103844	0.00469432	0.0122631	0.0136293	0.0138302	0.0130722
323	0.00734714	0.00589154	0.00639184	0.00654686		7.13333	-115.6	-27.8		323	0.00235568	0.00286535	0.0027818		323	0.00749817	0.00686392	0.00772516	0.00713996	0.00763741	0.00832368	0.00942652	0.0103705	-0.00063425	0.00022699	-0.00035821	0.00013924	0.00082551	0.00192835	0.00287233	0.00683919	0.00524064	0.00607599	0.0103705	0.00467939	0.012345	0.0136459	0.0139236	0.0130121
322	0.00711126	0.00557009	0.00627774	0.00653841		7.15	-113	-29.4		322	0.00237901	0.0027287	0.00262178		322	0.00753634	0.00666672	0.00753903	0.00698333	0.00764366	0.00817722	0.00922986	0.0101352	-0.00086962	2.69013e-06	-0.00055301	0.00010732	0.00064088	0.00169352	0.00259886	0.00679686	0.00515056	0.00593837	0.0101352	0.00442508	0.0123974	0.0139581	0.0140647	0.0130062
321	0.00705632	0.00559492	0.00579021	0.00643793		7.16667	-114.8	-24.2		321	0.00245904	0.00279204	0.0027185		321	0.00750795	0.00656684	0.00742691	0.00691467	0.00760223	0.00814986	0.0091789	0.0100645	-0.00094111	-8.104e-05	-0.00059328	9.42801e-05	0.00064191	0.00167095	0.00255655	0.00675181	0.00514414	0.00590097	0.0100645	0.00448085	0.0126851	0.014175	0.0141815	0.0133012
320	0.00708	0.00547417	0.00551129	0.00635108		7.18333	-113	-14.4		320	0.00237575	0.00306197	0.00279845		320	0.00729729	0.00649984	0.00735807	0.00688455	0.00746724	0.00802596	0.00909448	0.0101158	-0.00079745	6.078e-05	-0.00041274	0.00016995	0.00072867	0.00179719	0.00281851	0.00662388	0.00487849	0.00579122	0.0101158	0.00440837	0.0129366	0.0139882	0.0142598	0.0134627
319	0.00706972	0.0059959	0.00609842	0.00619855		7.2	-112.6	0.4		319	0.00229576	0.00303197	0.00279849		319	0.00728727	0.00653967	0.00746305	0.00692031	0.00737632	0.00800967	0.00913879	0.0101658	-0.0007476	0.00017578	-0.00036696	8.90503e-05	0.0007224	0.00185152	0.00287853	0.00664453	0.00505133	0.00583791	0.0101658	0.00445741	0.0133319	0.0141883	0.0145218	0.0136307
318	0.00709395	0.00595551	0.0061476	0.00623979		7.21667	-109.6	29.8		318	0.0023957	0.00295532	0.00291845		318	0.00753313	0.00665573	0.0075604	0.00691243	0.00750022	0.00818031	0.00927557	0.010142	-0.0008774	2.72701e-05	-0.0006207	-3.29097e-05	0.00064718	0.00174244	0.00260887	0.00671752	0.00513836	0.00598747	0.010142	0.00461338	0.0132315	0.0144104	0.0145704	0.0137204
317	0.00698406	0.00587889	0.00595332	0.00596488		7.23333	-107.4	78.6		317	0.00277574	0.00281199	0.00302518		317	0.00732277	0.00665648	0.00751674	0.00702398	0.00772486	0.00818314	0.0092105	0.0101092	-0.00066629	0.00019397	-0.00029879	0.00040209	0.00086037	0.00188773	0.00278643	0.00681299	0.00503133	0.00610016	0.0101092	0.00437685	0.0134646	0.0145312	0.0146856	0.013854
316	0.00695184	0.00577293	0.00591803	0.00603062		7.25	-109	153.4		316	0.00279906	0.00282534	0.00306186		316	0.00722526	0.00644836	0.00744919	0.0070609	0.00746819	0.00813695	0.00912823	0.00998373	-0.0007769	0.00022393	-0.00016436	0.00024293	0.00091169	0.00190297	0.00275847	0.00670846	0.00489791	0.00597048	0.00998373	0.00414572	0.0137534	0.014844	0.0150374	0.0142456
315	0.00693909	0.00568283	0.00599584	0.00624194		7.26667	-104.8	250		315	0.00299234	0.0028954	0.0031018		315	0.00749718	0.00693493	0.0075698	0.00722622	0.00751733	0.00823789	0.00916832	0.0103536	-0.00056225	7.26203e-05	-0.00027096	2.01501e-05	0.00074071	0.00167114	0.00285642	0.00683255	0.00532257	0.00613554	0.0103536	0.00448123	0.0141186	0.0151716	0.0153974	0.0145803
314	0.00694826	0.00616393	0.00628112	0.00628544		7.28333	-96	378.8		314	0.00288907	0.00288196	0.00315846		314	0.00757077	0.00701528	0.00773793	0.00727506	0.00757573	0.00835482	0.00917773	0.0103766	-0.00055549	0.00016716	-0.00029571	4.95976e-06	0.00078405	0.00160696	0.00280583	0.00707414	0.00529422	0.0062226	0.0103766	0.00434275	0.0146425	0.0154872	0.0156853	0.014706
313	0.00730077	0.00627376	0.00634343	0.00659448		7.3	-86.4	526.2		313	0.00287238	0.00308204	0.00320845		313	0.00770237	0.0068085	0.00770623	0.00729201	0.00754204	0.00834118	0.00920204	0.0103312	-0.00089387	3.85987e-06	-0.00041036	-0.00016033	0.00063881	0.00149967	0.00262883	0.00705998	0.00498579	0.00624141	0.0103312	0.00422812	0.0149798	0.0157975	0.0158482	0.0149505
312	0.00783479	0.00585531	0.00642272	0.00687327		7.31667	-78.2	682.8		312	0.00289908	0.00317868	0.00323181		312	0.00791386	0.00689486	0.00796528	0.00737253	0.00783242	0.00836347	0.0094662	0.0104246	-0.001019	5.14202e-05	-0.000541329	-8.14395e-05	0.000449611	0.00155234	0.00251074	0.00712726	0.0051128	0.0065879	0.0104246	0.00450193	0.0153095	0.0162652	0.0163642	0.0153448
311	0.00800035	0.00606629	0.00640449	0.00704658		7.33333	-75	825.4		311	0.0026857	0.0034287	0.00337514		311	0.00785211	0.0070738	0.0078649	0.00728682	0.00788263	0.00825466	0.00945806	0.0102968	-0.00077831	1.27899e-05	-0.00056529	3.05204e-05	0.00040255	0.00160595	0.00244469	0.00707287	0.00511945	0.00649477	0.0102968	0.00433854	0.0160401	0.0168601	0.0170871	0.0159476
310	0.00791845	0.00671317	0.00674649	0.0071359		7.35	-68.8	926.8		310	0.00258576	0.00356531	0.0032518		310	0.00806174	0.00757384	0.00819989	0.00770822	0.0081255	0.00881882	0.0097662	0.0106977	-0.000487899	0.000138151	-0.00035352	6.37602e-05	0.00075708	0.00170446	0.00263596	0.00737971	0.00536254	0.00670153	0.0106977	0.0047949	0.016555	0.0173518	0.0175082	0.0163769
309	0.0084866	0.00719006	0.00718691	0.00773124		7.36667	-67.6	972.4		309	0.00288903	0.00357529	0.00338845		309	0.00870929	0.00802168	0.00871872	0.00815278	0.00858388	0.0093278	0.0100906	0.0112634	-0.00068761	9.42964e-06	-0.00055651	-0.00012541	0.00061851	0.00138131	0.00255411	0.00789461	0.005947	0.00705775	0.0112634	0.00534567	0.0171394	0.0179572	0.0179771	0.0170017
308	0.00933677	0.00801828	0.0079751	0.00865392		7.38333	-65.4	941.2		308	0.00317573	0.00340533	0.00352849		308	0.00944125	0.00867288	0.00935501	0.00883536	0.00916905	0.00985536	0.0106492	0.01185	-0.00076837	-8.62395e-05	-0.00060589	-0.0002722	0.00041411	0.00120795	0.00240875	0.00837206	0.00637301	0.00758378	0.01185	0.00565141	0.0180626	0.0186283	0.0186993	0.0176995
307	0.0104165	0.00892943	0.00892493	0.00944645		7.4	-72.2	839		307	0.00299242	0.0032053	0.00392847		307	0.0101294	0.00946016	0.0102132	0.0094132	0.0101477	0.0106723	0.0114412	0.0125319	-0.00066924	8.38004e-05	-0.000716199	1.83005e-05	0.000542901	0.0013118	0.0024025	0.00922411	0.00685647	0.00827022	0.0125319	0.00618266	0.0185198	0.0193767	0.0192998	0.0184107
306	0.0115414	0.00978963	0.00976253	0.0103593		7.41667	-82	690.2		306	0.0030624	0.00336198	0.00399177		306	0.0108232	0.0101873	0.0109542	0.0103449	0.01074	0.0113832	0.0121693	0.0134649	-0.000635901	0.000131	-0.0004783	-8.32006e-05	0.00056	0.0013461	0.0026417	0.0101408	0.00736563	0.00910251	0.0134649	0.00682713	0.0195974	0.0206217	0.0204673	0.0194778
305	0.0131704	0.0112815	0.0111898	0.0121376		7.43333	-94.2	521.2		305	0.00325238	0.00302196	0.00446511		305	0.012133	0.0111704	0.0119352	0.0116119	0.011788	0.0124357	0.0133072	0.0142973	-0.0009626	-0.000197801	-0.0005211	-0.000345	0.000302699	0.0011742	0.0021643	0.011306	0.00823907	0.0100729	0.0142973	0.00763478	0.0209901	0.0219645	0.0219496	0.0207747
304	0.0149181	0.0133778	0.013118	0.0140238		7.45	-102.6	361.8		304	0.00270568	0.00346867	0.00516173		304	0.0137638	0.0127552	0.013651	0.0131127	0.0132715	0.0137884	0.0148353	0.0156593	-0.0010086	-0.0001128	-0.000651101	-0.0004923	2.46e-05	0.0010715	0.0018955	0.0128842	0.00936712	0.0114129	0.0156593	0.00884877	0.0224495	0.0233017	0.0233001	0.0222526
303	0.0170386	0.0157067	0.0156173	0.0161303		7.46667	-108.4	228.4		303	0.00340238	0.00334199	0.00517179		303	0.0155243	0.0146716	0.0156376	0.0149313	0.0152951	0.0156921	0.0165128	0.0175307	-0.000852699	0.000113301	-0.000593	-0.000229199	0.0001678	0.0009885	0.0020064	0.0148886	0.0106906	0.0130017	0.0175307	0.0103967	0.0242156	0.0248905	0.0248146	0.0239156
302	0.0198811	0.0186971	0.0186949	0.0190358		7.48333	-114.6	129.4		302	0.00270572	0.00306865	0.00597514		302	0.0179033	0.0172279	0.0180017	0.0173413	0.0176181	0.0181583	0.0189505	0.0198834	-0.000675401	9.83998e-05	-0.000561999	-0.000285201	0.000255	0.0010472	0.0019801	0.0172643	0.0125486	0.0152464	0.0198834	0.0123124	0.0263581	0.0270131	0.0270186	0.0259395
301	0.0232075	0.0216819	0.021623	0.0224415		7.5	-114	61.6		301	0.00305902	0.00281203	0.00620513		301	0.0208647	0.0199214	0.0207528	0.0201092	0.0205476	0.0208901	0.0214518	0.0224945	-0.000943301	-0.0001119	-0.0007555	-0.0003171	2.5399e-05	0.000587098	0.0016298	0.0200328	0.0145945	0.0178654	0.0224945	0.0145991	0.0285864	0.0292321	0.0293091	0.0280171
300	0.0270755	0.0257202	0.0259894	0.0261684		7.51667	-115	19.2		300	0.00233248	0.0035919	0.00603172		300	0.0243349	0.0234228	0.0240725	0.0235429	0.0238904	0.0243018	0.0247842	0.025763	-0.0009121	-0.0002624	-0.000792	-0.0004445	-3.30992e-05	0.0004493	0.0014281	0.0233115	0.0173156	0.0209057	0.025763	0.0171386	0.0314232	0.0319341	0.031921	0.0305597
299	0.0319002	0.0305816	0.0306788	0.0307486		7.53333	-112	-1.8		299	0.00236562	0.00299537	0.0059017		299	0.0279609	0.0272814	0.0278423	0.0272417	0.0276977	0.028027	0.0285831	0.0294358	-0.0006795	-0.0001186	-0.000719201	-0.000263201	6.60997e-05	0.0006222	0.0014749	0.0271531	0.0201797	0.0240564	0.0294358	0.0201181	0.0344412	0.0349403	0.0348805	0.0337375
298	0.0376115	0.0357726	0.0360115	0.0360478		7.55	-113.4	-12		298	-0.000241011	0.00487212	0.00472169		298	0.0325822	0.0319549	0.0326535	0.031963	0.0321563	0.0326436	0.0330844	0.0338325	-0.000627302	7.12983e-05	-0.000619203	-0.000425901	6.14002e-05	0.000502199	0.0012503	0.0319705	0.0237952	0.0281439	0.0338325	0.0239008	0.0378926	0.0381491	0.038027	0.0370338
297	0.0441182	0.0419866	0.0420879	0.0424841		7.56667	-114.2	-19.2		297	-0.00878768	0.0124587	0.00143517		297	0.0379812	0.0372674	0.0378705	0.0372243	0.0375518	0.0376977	0.0382877	0.0390982	-0.000713799	-0.000110701	-0.000756901	-0.000429399	-0.000283502	0.000306498	0.001117	0.0374836	0.027916	0.0327333	0.0390982	0.028211	0.0418435	0.0419141	0.0417998	0.0406395
296	0.0518312	0.0499567	0.0499049	0.0501647		7.58333	-116.4	-26.4		296	-0.0277243	0.016902	-0.00446497		296	0.0447053	0.0437107	0.0442629	0.0436763	0.0439289	0.0441266	0.0448593	0.0454266	-0.0009946	-0.000442401	-0.001029	-0.000776403	-0.000578701	0.000154	0.000721298	0.0442597	0.032793	0.0381077	0.0454266	0.0332088	0.0461815	0.0463903	0.0463601	0.0448787
295	0.0608392	0.0589437	0.059485	0.0593674		7.6	-115.4	-30.8		295	-0.0426344	0.0169087	-0.0224983		295	0.0525559	0.0516881	0.0521875	0.0516255	0.0518518	0.0518836	0.0524938	0.0532448	-0.000867799	-0.000368401	-0.000930399	-0.000704098	-0.000672299	-6.21006e-05	0.000688899	0.0522316	0.0389731	0.044756	0.0532448	0.0393729	0.0513778	0.0516466	0.0514171	0.0501617
294	0.0712242	0.0693541	0.0700671	0.0701341		7.61667	-118.2	-31.8		294	-0.0620175	0.0409819	-0.0038648		294	0.0618243	0.0609269	0.0616692	0.0610055	0.0612495	0.0611813	0.0617023	0.0624273	-0.0008974	-0.000155099	-0.0008188	-0.000574801	-0.000643	-0.000122	0.000603002	0.0615799	0.0459179	0.0525273	0.0624273	0.0465696	0.0575859	0.0576503	0.0576404	0.0563915
293	0.0821614	0.0806971	0.0814148	0.0811026		7.63333	-119.4	-32.2		293	-0.0270277	0.0106754	0.0103852		293	0.0720584	0.071287	0.07203	0.0712268	0.0713954	0.0710807	0.0717241	0.0723732	-0.000771403	-2.84016e-05	-0.000831604	-0.000663005	-0.000977702	-0.0003343	0.000314794	0.0716225	0.0536914	0.0612291	0.0723732	0.0548957	0.0641503	0.064043	0.0641543	0.0629184
292	0.0922194	0.0906353	0.0912348	0.0910177		7.65	-121.2	-30		292	0.00282235	-0.00993462	-0.00519152		292	0.0815471	0.0808451	0.0813783	0.0808643	0.0809605	0.0804285	0.0808262	0.0815948	-0.000701994	-0.000168793	-0.000682794	-0.000586599	-0.00111859	-0.000720896	4.77061e-05	0.0811353	0.0606774	0.0691659	0.0815948	0.0624567	0.0700659	0.0700056	0.0699049	0.0686895
291	0.100238	0.0981262	0.0985559	0.0987571		7.66667	-123.6	-33.6		291	0.00166252	-0.0214749	0.0102219		291	0.0893328	0.0887376	0.0890651	0.0886557	0.0885767	0.0879821	0.0882955	0.0889932	-0.000595197	-0.000267699	-0.000677094	-0.0007561	-0.00135069	-0.0010373	-0.000339597	0.0890185	0.0668131	0.0757502	0.0889932	0.0684101	0.0755137	0.0754907	0.0753457	0.0739236
290	0.107162	0.104052	0.104485	0.104901		7.68333	-121.2	-31.4		290	-0.00315099	-0.0154248	0.0187451		290	0.095724	0.0946558	0.0951403	0.0946719	0.0947137	0.0938834	0.0943036	0.0946949	-0.0010682	-0.000583701	-0.0010521	-0.0010103	-0.0018406	-0.0014204	-0.0010291	0.0954793	0.0718801	0.0806954	0.0946949	0.0729505	0.0802413	0.0800286	0.0797931	0.0785591
289	0.114597	0.111288	0.111562	0.111877		7.7	-119.6	-30.6		289	0.018369	-0.0207013	0.0464016		289	0.102174	0.101182	0.102027	0.101106	0.10127	0.100433	0.100618	0.101144	-0.000992	-0.000147	-0.001068	-0.000904001	-0.001741	-0.001556	-0.00103	0.102466	0.077286	0.0862504	0.101144	0.0777501	0.0851522	0.0848213	0.0844307	0.083091
288	0.123429	0.120226	0.119983	0.120392		7.71667	-117.6	-28.2		288	0.0197691	-0.0324347	0.0438517		288	0.109517	0.108573	0.109117	0.108427	0.108339	0.107519	0.107848	0.108532	-0.000944003	-0.000399999	-0.00109	-0.001178	-0.001998	-0.001669	-0.000985004	0.11009	0.0828795	0.0926005	0.108532	0.0835259	0.0907661	0.0902033	0.0898786	0.0885137
287	0.132372	0.128557	0.128515	0.129061		7.73333	-116.8	-26.6		287	0.0251258	-0.0116581	0.0427952		287	0.117769	0.116914	0.117392	0.116698	0.116587	0.115781	0.116384	0.117001	-0.000855006	-0.000376999	-0.00107101	-0.001182	-0.001988	-0.001385	-0.000768006	0.118713	0.0889844	0.0998077	0.117001	0.0903591	0.0965044	0.0961215	0.0958174	0.0942494
286	0.140156	0.136305	0.136587	0.136916		7.75	-117.2	-26		286	0.0511388	-0.0180647	0.0148417		286	0.125507	0.124925	0.12533	0.124585	0.124424	0.123775	0.124379	0.124981	-0.000581995	-0.000176996	-0.000921994	-0.00108299	-0.001732	-0.001128	-0.000525996	0.126485	0.0948317	0.107205	0.124981	0.0968996	0.10212	0.101725	0.101615	0.10011
285	0.146033	0.142671	0.142688	0.142932		7.76667	-118.6	-25.6		285	0.0979491	-0.0407413	-0.00443811		285	0.132351	0.131318	0.131747	0.131337	0.131209	0.130439	0.130973	0.131625	-0.00103299	-0.000603989	-0.00101399	-0.001142	-0.001912	-0.001378	-0.000725999	0.133013	0.0994457	0.113164	0.131625	0.102482	0.107253	0.106888	0.106785	0.105318
284	0.150111	0.147041	0.147023	0.146944		7.78333	-121.6	-24.4		284	0.0611823	-0.0167146	0.0318083		284	0.136908	0.135914	0.136458	0.13573	0.13571	0.134863	0.135408	0.136078	-0.000993997	-0.00045	-0.001178	-0.00119799	-0.00204499	-0.0015	-0.000829995	0.137519	0.102637	0.117041	0.136078	0.106117	0.111608	0.111451	0.110965	0.109804
283	0.15345	0.149878	0.14976	0.15009		7.8	-126.2	-25.2		283	0.0373757	0.0249656	0.0175617		283	0.139845	0.139028	0.139809	0.138777	0.138954	0.137849	0.138413	0.13907	-0.000817001	-3.60012e-05	-0.001068	-0.000891	-0.001996	-0.001432	-0.000774994	0.140833	0.104771	0.119817	0.13907	0.108522	0.114894	0.11457	0.114376	0.113087
282	0.155938	0.152127	0.152183	0.152368		7.81667	-125.8	-25		282	0.0166691	0.0340488	-0.0380615		282	0.142635	0.141549	0.142346	0.14144	0.141658	0.14061	0.141089	0.141605	-0.001086	-0.000289008	-0.001195	-0.00097701	-0.00202501	-0.001546	-0.00103	0.143539	0.106769	0.121894	0.141605	0.110394	0.117962	0.11733	0.117483	0.116105
281	0.157544	0.153399	0.153946	0.154067		7.83333	-125.6	-23.8		281	0.00901567	-0.00231143	-0.0565749		281	0.14486	0.143678	0.144416	0.143716	0.143644	0.14266	0.143378	0.14373	-0.001182	-0.000443995	-0.00114401	-0.00121599	-0.00219999	-0.001482	-0.00113	0.145664	0.108299	0.123474	0.14373	0.111973	0.121132	0.120363	0.120583	0.118945
280	0.158129	0.153819	0.15422	0.154409		7.85	-126	-25		280	-0.0361745	0.0361488	-0.0571181		280	0.146019	0.144846	0.145991	0.144924	0.14486	0.14369	0.144288	0.14539	-0.00117299	-2.79993e-05	-0.001095	-0.001159	-0.00232899	-0.00173099	-0.000628993	0.146771	0.108691	0.124565	0.14539	0.112705	0.123541	0.122944	0.122708	0.121316
279	0.157338	0.153551	0.15365	0.15364		7.86667	-123.4	-24.4		279	-0.0638576	0.046562	-0.0163282		279	0.146266	0.145012	0.145996	0.145087	0.14513	0.143965	0.144924	0.145583	-0.00125399	-0.000269994	-0.00117899	-0.001136	-0.00230099	-0.001342	-0.000682995	0.146868	0.108615	0.124804	0.145583	0.112744	0.125666	0.125049	0.12487	0.123558
278	0.156132	0.152451	0.152297	0.152772		7.88333	-120.8	-25		278	-0.038751	0.0114353	-0.0217416		278	0.145763	0.144835	0.145551	0.144802	0.144807	0.143877	0.144695	0.145406	-0.000928	-0.000211999	-0.000960991	-0.000955999	-0.001886	-0.001068	-0.000357002	0.146576	0.108092	0.124482	0.145406	0.112882	0.127354	0.126804	0.1266	0.125206
277	0.154595	0.151325	0.15118	0.151626		7.9	-118.8	-28		277	-0.0700444	0.0221586	0.0180951		277	0.144841	0.143709	0.144427	0.143834	0.143888	0.142945	0.143558	0.144502	-0.001132	-0.000413999	-0.00100701	-0.000953004	-0.00189599	-0.001283	-0.000339001	0.145864	0.106733	0.123536	0.144502	0.111972	0.128656	0.128249	0.12796	0.126883
276	0.152675	0.149434	0.149424	0.149877		7.91667	-116.4	-28.6		276	-0.0928143	0.0477522	0.0296551		276	0.143754	0.142783	0.143446	0.142865	0.142708	0.141477	0.142618	0.143582	-0.000971004	-0.000308007	-0.000889003	-0.001046	-0.002277	-0.001136	-0.000172004	0.144495	0.105285	0.122588	0.143582	0.110803	0.130219	0.129805	0.129704	0.128502
275	0.150291	0.147264	0.14727	0.147397		7.93333	-117.2	-29		275	-0.0602742	-0.00394475	0.0430518		275	0.142465	0.141517	0.142038	0.14146	0.141412	0.140398	0.141265	0.142266	-0.000947997	-0.000426993	-0.00100499	-0.00105299	-0.002067	-0.00119999	-0.00019899	0.142783	0.103707	0.120884	0.142266	0.10931	0.131038	0.130975	0.130759	0.129372
274	0.147193	0.144218	0.144094	0.144407		7.95	-117	-27.4		274	0.0177558	-0.051778	0.0388817		274	0.140218	0.139179	0.139839	0.139269	0.139174	0.138448	0.139289	0.140107	-0.001039	-0.000379011	-0.00094901	-0.00104401	-0.00177	-0.000928998	-0.000110999	0.140363	0.101719	0.118577	0.140107	0.106987	0.131694	0.13138	0.131045	0.129706
273	0.143706	0.140408	0.140336	0.141017		7.96667	-116.6	-25.8		273	0.0560191	-0.0488312	-0.0146582		273	0.137411	0.136599	0.137391	0.136623	0.13636	0.135877	0.136573	0.137584	-0.000811994	-1.99974e-05	-0.000788003	-0.00105099	-0.001534	-0.000837997	0.000173002	0.137663	0.0993587	0.116007	0.137584	0.104559	0.132124	0.131658	0.131465	0.130348
272	0.139937	0.136922	0.136581	0.137271		7.98333	-123.6	-22		272	0.00904889	-0.00239456	0.0375185		272	0.134847	0.13392	0.13447	0.133658	0.133505	0.132922	0.133885	0.134964	-0.000927001	-0.000376999	-0.00118899	-0.001342	-0.00192501	-0.000962004	0.000117004	0.134837	0.0965447	0.113042	0.134964	0.102072	0.132111	0.131992	0.131815	0.13056
271	0.13588	0.133362	0.133326	0.133413		8	-123.4	-15.8		271	0.0719925	-0.0426948	-0.0412118		271	0.13156	0.130509	0.131381	0.130703	0.130622	0.129692	0.130998	0.131757	-0.00105099	-0.000178993	-0.000856996	-0.000937998	-0.00186799	-0.000561997	0.000197008	0.131716	0.0936516	0.109973	0.131757	0.0994928	0.132063	0.132119	0.131694	0.130739
270	0.131844	0.129524	0.129652	0.12987		8.01667	-124.4	-16.2		270	0.142492	-0.0967946	-0.0465683		270	0.128701	0.127544	0.128512	0.127674	0.128188	0.126971	0.128273	0.129123	-0.001157	-0.000189006	-0.001027	-0.000513002	-0.00173	-0.000428006	0.000422001	0.128706	0.0914776	0.107017	0.129123	0.0968949	0.131986	0.131996	0.131512	0.130601
269	0.127743	0.125311	0.125279	0.125749		8.03333	-126	-14.4		269	0.115279	-0.0553248	-0.0798246		269	0.125638	0.124241	0.124947	0.124337	0.124442	0.12394	0.12491	0.126011	-0.00139699	-0.000690997	-0.00130099	-0.00119599	-0.00169799	-0.000727996	0.000373006	0.125463	0.0882234	0.103447	0.126011	0.0935922	0.131469	0.131513	0.131279	0.130183
268	0.122988	0.120864	0.120451	0.12102		8.05	-124.8	-12.2		268	0.0856525	0.0185753	-0.0324116		268	0.12173	0.120834	0.121084	0.120615	0.120631	0.120258	0.121236	0.121952	-0.000895999	-0.000646003	-0.001115	-0.001099	-0.001472	-0.000494003	0.000221997	0.121559	0.0848525	0.099642	0.121952	0.0902015	0.13061	0.131035	0.130771	0.129595
267	0.118526	0.116526	0.116113	0.11673		8.06667	-118.2	-9.2		267	0.0522457	0.00820522	-0.0328447		267	0.118044	0.117408	0.117807	0.117257	0.117312	0.116741	0.117613	0.118615	-0.000635996	-0.000236996	-0.000786997	-0.000731997	-0.00130299	-0.000430994	0.000571005	0.117841	0.0818434	0.096174	0.118615	0.0870694	0.129649	0.130157	0.129759	0.12849
266	0.114572	0.112789	0.112708	0.112738		8.08333	-118	-6.8		266	0.0303522	0.00712883	-0.0755549		266	0.114848	0.113688	0.114366	0.114014	0.113723	0.113182	0.11436	0.115446	-0.00116	-0.000482	-0.000834003	-0.001125	-0.001666	-0.000488006	0.000597999	0.11443	0.0789552	0.0925449	0.115446	0.0841188	0.128981	0.129458	0.128967	0.127761
265	0.110233	0.108405	0.108198	0.108436		8.1	-120.4	-3.4		265	-0.00775771	0.0536486	-0.0250914		265	0.111107	0.110057	0.110987	0.110291	0.110369	0.109819	0.111043	0.111886	-0.00105	-0.000119999	-0.000816002	-0.000738002	-0.001288	-6.40005e-05	0.000779003	0.110759	0.0757006	0.0892013	0.111886	0.0806006	0.128165	0.128545	0.12844	0.12727
264	0.105625	0.103807	0.103373	0.104092		8.11667	-119.6	-8.8		264	-0.0199711	0.100432	-0.046498		264	0.107226	0.106922	0.106999	0.10652	0.106611	0.105907	0.107051	0.108085	-0.000303999	-0.000226997	-0.000706002	-0.000615001	-0.001319	-0.000174999	0.000859	0.106907	0.0726179	0.0854397	0.108085	0.0775035	0.12672	0.127172	0.127015	0.125607
263	0.1011	0.0994032	0.0992012	0.0996701		8.13333	-118.2	-15.2		263	-0.0980209	0.118409	-0.0387847		263	0.103556	0.102863	0.103155	0.102714	0.10281	0.102509	0.103243	0.104015	-0.000693001	-0.000400998	-0.000841998	-0.000745997	-0.001047	-0.000312999	0.000459	0.10284	0.0698237	0.0813248	0.104015	0.0739132	0.1259	0.125962	0.125893	0.124674
262	0.0967871	0.0956182	0.0957372	0.0955849		8.15	-118.2	-19.4		262	-0.109314	0.126289	0.00877187		262	0.0998935	0.0990195	0.0997354	0.0991724	0.0991284	0.0984418	0.0997076	0.100772	-0.000874005	-0.000158101	-0.000721104	-0.0007651	-0.0014517	-0.000185899	0.000878498	0.0995321	0.0666683	0.077863	0.100772	0.0704319	0.124421	0.12437	0.124538	0.12308
261	0.0935808	0.0924591	0.0925422	0.0926553		8.16667	-123.6	-24		261	-0.103191	0.0908424	0.065705		261	0.0962455	0.0956037	0.0962797	0.0955132	0.0955978	0.0952283	0.0965049	0.0974197	-0.0006418	3.42056e-05	-0.000732295	-0.000647694	-0.0010172	0.000259399	0.0011742	0.0957952	0.063708	0.0743781	0.0974197	0.0679585	0.123001	0.123533	0.123196	0.121763
260	0.0906344	0.0894873	0.0894139	0.089488		8.18333	-126.6	-24.4		260	-0.0718044	0.0557354	0.052545		260	0.093145	0.0924434	0.0930534	0.0923579	0.0924726	0.0920653	0.0932408	0.0945432	-0.000701599	-9.15974e-05	-0.000787094	-0.0006724	-0.0010797	9.57996e-05	0.00139821	0.0924724	0.0612661	0.0712142	0.0945432	0.0655343	0.121939	0.122362	0.121698	0.120529
259	0.086958	0.0858087	0.0858002	0.0858702		8.2	-123.2	-26.2		259	-0.118581	-0.0146814	0.0845952		259	0.0901175	0.0891961	0.0900422	0.089399	0.0894943	0.0891541	0.0899274	0.0914605	-0.000921398	-7.52956e-05	-0.000718497	-0.000623196	-0.000963397	-0.000190102	0.001343	0.0896602	0.0584437	0.0685482	0.0914605	0.062714	0.120591	0.120877	0.120159	0.118861
258	0.0828168	0.0818514	0.0819522	0.0818097		8.21667	-121.4	-33.4		258	0.0463692	-0.105858	0.130565		258	0.0865248	0.0851894	0.0862915	0.0856157	0.0855741	0.0854398	0.0861918	0.0874318	-0.0013354	-0.0002333	-0.000909097	-0.000950702	-0.001085	-0.000332996	0.000907004	0.0858447	0.0556362	0.0649331	0.0874318	0.0594365	0.118629	0.119093	0.118646	0.117182
257	0.0789682	0.0781755	0.0782744	0.0779763		8.23333	-122.8	-31.8		257	0.122612	-0.167315	0.106078		257	0.0831909	0.0817885	0.0826379	0.0819139	0.0822578	0.0818166	0.0830611	0.0837643	-0.0014024	-0.000553004	-0.001277	-0.000933103	-0.0013743	-0.000129804	0.000573397	0.0822107	0.0529425	0.0616909	0.0837643	0.0565847	0.116547	0.117501	0.117017	0.115507
256	0.0759541	0.0753643	0.0754678	0.0751113		8.25	-122.4	-30.8		256	0.151819	-0.154055	0.0220353		256	0.0794684	0.078548	0.0793458	0.0782211	0.0785944	0.0784057	0.079443	0.0802527	-0.0009204	-0.000122599	-0.0012473	-0.000873998	-0.0010627	-2.5399e-05	0.0007843	0.078319	0.0502912	0.0579921	0.0802527	0.0539405	0.115807	0.116376	0.116136	0.115126
255	0.0739153	0.0731537	0.0730682	0.0731909		8.26667	-119.8	-30.6		255	0.0541389	-0.0809646	0.118729		255	0.0764943	0.0755733	0.0763337	0.075452	0.0756331	0.0756176	0.0767765	0.0775933	-0.000920996	-0.000160597	-0.0010423	-0.000861198	-0.000876702	0.000282198	0.001099	0.0753341	0.0484439	0.0553121	0.0775933	0.0512197	0.114796	0.11546	0.115221	0.114243
254	0.0720189	0.0714386	0.0713433	0.0714548		8.28333	-119.8	-35		254	0.0293191	0.00798206	0.0504953		254	0.0743701	0.0737361	0.0746062	0.073994	0.0739029	0.0735627	0.0744189	0.0755119	-0.000634	0.000236101	-0.000376098	-0.000467204	-0.000807405	4.88013e-05	0.0011418	0.073094	0.0468423	0.0536	0.0755119	0.0495887	0.11371	0.114226	0.114201	0.113072
253	0.0701276	0.0698398	0.0699148	0.0696801		8.3	-119.8	-37.6		253	0.0964957	-0.00483803	-0.109408		253	0.0717598	0.0711823	0.0718773	0.0709876	0.0712493	0.0710382	0.0719724	0.0730113	-0.000577494	0.000117503	-0.000772201	-0.000510499	-0.000721596	0.000212602	0.0012515	0.0702627	0.0447434	0.0508605	0.0730113	0.0473577	0.112797	0.113356	0.113225	0.111638
252	0.0687088	0.0682309	0.0682781	0.0682002		8.31667	-119.8	-34.2		252	0.0584424	0.0645586	-0.223275		252	0.0697169	0.0685382	0.0699243	0.0690459	0.0691525	0.0687779	0.0698402	0.070869	-0.0011787	0.000207402	-0.000670999	-0.000564404	-0.000939004	0.0001233	0.0011521	0.0679191	0.0435712	0.0491485	0.070869	0.0460024	0.112036	0.112622	0.112496	0.110984
251	0.0678138	0.0671942	0.0670285	0.0671133		8.33333	-124.2	-32.2		251	0.00984918	0.0731986	-0.147355		251	0.068341	0.0670218	0.0680588	0.0676476	0.0672698	0.0671472	0.0679266	0.0687157	-0.0013192	-0.000282198	-0.000693403	-0.0010712	-0.0011938	-0.000414401	0.000374697	0.0666991	0.0426943	0.0479011	0.0687157	0.0443763	0.111838	0.111943	0.111818	0.110939
250	0.0677711	0.0670569	0.0670846	0.0670834		8.35	-124.6	-35.4		250	0.00538217	0.042722	-0.0718316		250	0.066497	0.0652753	0.0661938	0.0656818	0.0655382	0.0656132	0.0663645	0.0671013	-0.0012217	-0.000303201	-0.000815198	-0.0009588	-0.000883795	-0.000132501	0.000604302	0.0650682	0.0415949	0.0456883	0.0671013	0.042858	0.111273	0.11178	0.110778	0.109957
						8.36667	-119.2	-35.8
						8.38333	-118.4	-34.4
						8.4	-118	-35.8
						8.41667	-116	-37.6
						8.43333	-114.8	-38.4
						8.45	-114.6	-40.2
						8.46667	-116.4	-41.8
						8.48333	-112.6	-41.2
						8.5	-110.6	-41.4
						8.51667	-106.6	-44.8
						8.53333	-111.2	-39
						8.55	-120.6	-36.2
						8.56667	-119.6	-35.4
						8.58333	-114.8	-38
						8.6	-113	-38.4
						8.61667	-114.2	-38.2
						8.63333	-112	-42.8
						8.65	-112.8	-42.4
						8.66667	-111.6	-41.4
						8.68333	-117	-40.8
						8.7	-122.2	-42.4
						8.71667	-123.8	-45.2
						8.73333	-124.8	-46
						8.75	-123	-45
						8.76667	-120.6	-42.2
						8.78333	-122.2	-38.6
						8.8	-123	-35.8
						8.81667	-126.2	-36.8
						8.83333	-125.8	-38.8
						8.85	-124	-36.8
						8.86667	-124.6	-35.6
						8.88333	-119.6	-35
						8.9	-116.8	-36.4
						8.91667	-116	-40
						8.93333	-118.8	-37.4
						8.95	-116.8	-36.6
						8.96667	-120	-36.2
						8.98333	-123.6	-35.4
						9	-121.4	-32.6
						9.01667	-118.6	-31.8
						9.03333	-117.2	-35.4
						9.05	-108.8	-38.6
						9.06667	-109.2	-37.8
						9.08333	-114.8	-33.6
						9.1	-117.6	-33.8
						9.11667	-119	-34.4
						9.13333	-118.6	-36.8
						9.15	-116.4	-31.2
						9.16667	-114.2	-31.2
						9.18333	-114.2	-28.4
						9.2	-113.4	-25.2
						9.21667	-113.2	-25.6
						9.23333	-112.4	-31
						9.25	-112.8	-32
						9.26667	-113.2	-33.4
						9.28333	-112.6	-30
						9.3	-111.8	-27.2
						9.31667	-114	-23
						9.33333	-113.8	-24
						9.35	-109.8	-25.6
						9.36667	-106.4	-28.8
						9.38333	-106	-33
						9.4	-112.2	-37.4
						9.41667	-113.4	-42.4
						9.43333	-112.6	-43
						9.45	-111	-43
						9.46667	-109.4	-43.4
						9.48333	-112.4	-43
						9.5	-110.2	-47
						9.51667	-110	-48.8
						9.53333	-111.4	-49.2
						9.55	-115	-49.4
						9.56667	-113.2	-44
						9.58333	-117.6	-40.2
						9.6	-114.8	-35.6
						9.61667	-112.8	-34.4
						9.63333	-109	-38.8
						9.65	-111.6	-38
						9.66667	-112	-37.8
						9.68333	-111.6	-42.6
						9.7	-114	-48.6
						9.71667	-113.6	-50
						9.73333	-116	-51.6
						9.75	-115.8	-53.2
						9.76667	-115	-54.6
						9.78333	-113	-49
						9.8	-112.8	-43.6
						9.81667	-113.2	-39.4
						9.83333	-112.8	-38.8
						9.85	-114.6	-37.4
						9.86667	-117.8	-38.6
						9.88333	-115.4	-40
						9.9	-116	-46
						9.91667	-116	-46.6
						9.93333	-116.6	-49.6
						9.95	-120	-49.2
						9.96667	-118.6	-45.4
						9.98333	-115.4	-46.4
						10	-118	-51.2
						10.0167	-115.6	-50.4
						10.0333	-115.4	-48
						10.05	-113.8	-50.8
						10.0667	-110.4	-51.2
						10.0833	-108.2	-50.8
						10.1	-110.4	-52.8
						10.1167	-117.6	-52.2
						10.1333	-120	-53.6
						10.15	-122.8	-57.2
						10.1667	-120.2	-52
						10.1833	-116.8	-48.8
						10.2	-118.8	-47.4
						10.2167	-119.6	-41.6
						10.2333	-120.8	-42.2
						10.25	-121.4	-44.4
						10.2667	-119.4	-45.6
						10.2833	-118.2	-47
						10.3	-113.6	-48.8
						10.3167	-109	-48.4
						10.3333	-105.2	-50.2
						10.35	-110.4	-56
						10.3667	-112.8	-55.6
						10.3833	-114.2	-54.2
						10.4	-111.6	-51.8
						10.4167	-115.6	-52.4
						10.4333	-113.2	-51.8
						10.45	-114.6	-51
						10.4667	-115.8	-46.6
						10.4833	-117.8	-45.8
						10.5	-118	-50.4
						10.5167	-114.2	-55.6
						10.5333	-110.4	-60.8
						10.55	-112.2	-52.2
						10.5667	-120.8	-52.4
						10.5833	-117.8	-53.8
						10.6	-111.4	-50.4
						10.6167	-113.4	-51.6
						10.6333	-114	-57
						10.65	-120	-58
						10.6667	-121.2	-54.6
						10.6833	-120.4	-51.6
						10.7	-121.2	-51.2
						10.7167	-124	-54.4
						10.7333	-119.8	-54.4
						10.75	-117.8	-52.8
						10.7667	-113.4	-56.6
						10.7833	-116.6	-57.8
						10.8	-116.6	-53
						10.8167	-114.6	-49.8
						10.8333	-114	-51.8
						10.85	-115.2	-52.8
						10.8667	-117.8	-53.4
						10.8833	-117	-55
						10.9	-117.4	-57.2
						10.9167	-115.4	-56
						10.9333	-109.2	-55.8
						10.95	-101.2	-57
						10.9667	-90	-54.2
						10.9833	-82.8	-52
						11	-79	-52.4
						11.0167	-71.4	-59.6
						11.0333	-70	-60.4
						11.05	-65.8	-64.4
						11.0667	-62	-64
						11.0833	-52	-61.6
						11.1	-45	-61.8
						11.1167	-39.8	-59
						11.1333	-35.8	-57.2
						11.15	-35.4	-55.6
						11.1667	-32.2	-51.6
						11.1833	-26	-50.8
						11.2	-18.6	-53.4
						11.2167	-12.6	-50.2
						11.2333	-9.2	-52
						11.25	-9.4	-55.8
						11.2667	-6.4	-60
						11.2833	-6.4	-58.8
						11.3	-10	-58.6
						11.3167	-9.2	-55.6
						11.3333	-6.8	-58
						11.35	-9.4	-57.8
						11.3667	-13.4	-52.2
						11.3833	-19.4	-47.6
						11.4	-23.8	-47.8
						11.4167	-30.2	-47
						11.4333	-32.4	-50.6
						11.45	-36.6	-54.4
						11.4667	-45.6	-60.2
						11.4833	-53.4	-66.4
						11.5	-62.8	-70.4
						11.5167	-63.6	-70.6
						11.5333	-65	-67.6
						11.55	-72.2	-63.6
						11.5667	-76	-60.2
						11.5833	-83.8	-62
						11.6	-93.2	-67.8
						11.6167	-102.8	-69.8
						11.6333	-106.6	-71.2
						11.65	-108.8	-74.6
						11.6667	-110.6	-77.4
						11.6833	-115	-75.2
						11.7	-116.6	-77.6
						11.7167	-114.8	-75.4
						11.7333	-113.2	-68.6
						11.75	-114.6	-66
						11.7667	-117.2	-63.4
						11.7833	-117.6	-64.8
						11.8	-119.2	-62.2
						11.8167	-122.6	-57.4
						11.8333	-131.2	-58.4
						11.85	-130.6	-63.6
						11.8667	-129.6	-65
						11.8833	-126	-61.8
						11.9	-133	-58.8
						11.9167	-136.8	-64.2
						11.9333	-136.6	-63.2
						11.95	-133.4	-61.6
						11.9667	-136.6	-57.2
						11.9833	-139.4	-57.4
						12	-142	-60.8
						12.0167	-141.2	-62.4
						12.0333	-136.8	-58.8
						12.05	-134.2	-59.8
						12.0667	-135.4	-63.2
						12.0833	-137.8	-66.8
						12.1	-136	-70
						12.1167	-134.8	-68.2
						12.1333	-135.2	-73.8
						12.15	-138	-71.4
						12.1667	-135.8	-75.2
						12.1833	-133.4	-77
						12.2	-134	-73.8
						12.2167	-132.8	-72.6
						12.2333	-130.8	-73.6
						12.25	-134.4	-70.6
						12.2667	-133.6	-74.2
						12.2833	-131.8	-70.8
						12.3	-131.6	-68.6
						12.3167	-134.4	-68.6
						12.3333	-139.4	-67
						12.35	-140.4	-62.6
						12.3667	-142.8	-60
						12.3833	-144.8	-60
						12.4	-148.2	-63.8
						12.4167	-145.6	-65
						12.4333	-145.2	-66
						12.45	-149.2	-69.8
						12.4667	-149	-67.6
						12.4833	-145.2	-64.6
						12.5	-141.6	-62.8
						12.5167	-133.4	-61.6
						12.5333	-131.6	-60.4
						12.55	-138.4	-65.4
						12.5667	-141.2	-68.8
						12.5833	-140.8	-69.2
						12.6	-144	-71.4
						12.6167	-149	-71.4
						12.6333	-152.6	-68.6
						12.65	-151.6	-66.8
						12.6667	-149	-68
						12.6833	-151.2	-65.2
						12.7	-149.2	-61.4
						12.7167	-152.6	-62.2
						12.7333	-156	-60.6
						12.75	-155.4	-58.4
						12.7667	-153.8	-55.4
						12.7833	-155	-56
						12.8	-154.4	-57
						12.8167	-157.2	-60.6
						12.8333	-155	-62.4
						12.85	-153.8	-62.8
						12.8667	-150.6	-61
						12.8833	-152.4	-60.4
						12.9	-153.8	-62.4
						12.9167	-152	-66.4
						12.9333	-152	-67.6
						12.95	-153.6	-63.4
						12.9667	-154.2	-57.8
						12.9833	-151.2	-56.6
						13	-146.8	-58
						13.0167	-148	-62.8
						13.0333	-152.4	-64
						13.05	-150.8	-60.8
						13.0667	-144.4	-58.6
						13.0833	-141.6	-64.8
						13.1	-145.4	-62.6
						13.1167	-145.2	-63.8
						13.1333	-145.8	-63.8
						13.15	-144.2	-71.2
						13.1667	-143.8	-77
						13.1833	-143	-72.4
						13.2	-142.6	-73.4
						13.2167	-144.6	-75.2
						13.2333	-151	-76.2
						13.25	-150.8	-69.8
						13.2667	-147	-67.4
						13.2833	-150.6	-70.6
						13.3	-153.8	-69
						13.3167	-155.2	-68.8
						13.3333	-158.6	-69.2
						13.35	-155.8	-68.6
						13.3667	-149.8	-68.4
						13.3833	-148.8	-66.2
						13.4	-149.4	-69
						13.4167	-150.6	-71.2
						13.4333	-150.6	-71.8
						13.45	-150.4	-72.6
						13.4667	-150	-74.4
						13.4833	-150.4	-72.6
						13.5	-145.6	-73.4
						13.5167	-144.8	-69.6
						13.5333	-146	-67.8
						13.55	-139.8	-68.6
						13.5667	-140.6	-62.8
						13.5833	-146.8	-62
						13.6	-148.4	-66
						13.6167	-151.4	-68.4
						13.6333	-150.4	-68.6
						13.65	-148	-63.4
						13.6667	-151.8	-57.4
						13.6833	-151.6	-56.4
						13.7	-148.6	-56
						13.7167	-151.2	-57.4
						13.7333	-150.6	-55
						13.75	-149	-58
						13.7667	-148.6	-62.4
						13.7833	-149.6	-63.4
						13.8	-151.6	-63.2
						13.8167	-155.2	-64
						13.8333	-156.8	-62.2
						13.85	-156.4	-60.6
						13.8667	-156.4	-57.4
						13.8833	-162	-52.2
						13.9	-160.4	-53.2
						13.9167	-153.8	-54.4
						13.9333	-153.6	-58.6
						13.95	-153	-60.4
						13.9667	-154.4	-61.6
						13.9833	-154	-58.6
						14	-148	-59.2
						14.0167	-148.4	-59
						14.0333	-152.8	-53.4
						14.05	-155.2	-47.8
						14.0667	-155.6	-43
						14.0833	-154.2	-43.2
						14.1	-145	-42.6
						14.1167	-143	-37
						14.1333	-144.2	-32.8
						14.15	-147	-30
						14.1667	-147.2	-30.2
						14.1833	-150.8	-29.2
						14.2	-151.2	-20.6
						14.2167	-150.8	-13.2
						14.2333	-148.4	-6.8
						14.25	-143	-1.8
						14.2667	-140.6	2.2
						14.2833	-148.6	-3.6
						14.3	-151.8	-3
						14.3167	-151.8	1.6
						14.3333	-150.4	9
						14.35	-148.4	15.6
						14.3667	-143.4	14.4
						14.3833	-141.4	17.6
						14.4	-139	23
						14.4167	-142.6	23.2
						14.4333	-143.4	25.2
						14.45	-141.2	24
						14.4667	-141.6	27
						14.4833	-138.6	29.4
						14.5	-137	28.6
						14.5167	-138.4	27.4
						14.5333	-141.4	32.6
						14.55	-146.2	35.6
						14.5667	-146	34.2
						14.5833	-147.8	36
						14.6	-144.4	40
						14.6167	-138	43.2
						14.6333	-138	42
						14.65	-140.8	41
						14.6667	-140.6	40.4
						14.6833	-145.4	40
						14.7	-143.4	39.4
						14.7167	-137.8	33.2
						14.7333	-136.2	31.6
						14.75	-134	31.4
						14.7667	-137.8	28
						14.7833	-137.8	24.2
						14.8	-138.2	24.6
						14.8167	-141.2	19.4
						14.8333	-145	20.8
						14.85	-147	17.4
						14.8667	-143.8	15.6
						14.8833	-142.4	14.8
						14.9	-142.8	14.4
						14.9167	-143.4	13
						14.9333	-142.6	13
						14.95	-148.4	9.6
						14.9667	-149.8	5.6
						14.9833	-148.8	4
						15	-151.4	2.6
						15.0167	-151.6	-1
						15.0333	-149.2	-2.8
						15.05	-153.8	-10.8
						15.0667	-152.4	-8.4
						15.0833	-152	-10.4
						15.1	-151.8	-10
						15.1167	-151.2	-13.2
						15.1333	-153.6	-21.4
						15.15	-153	-24.8
						15.1667	-151.2	-25
						15.1833	-153.2	-30.8
						15.2	-151.8	-34.4
						15.2167	-149.8	-37.6
						15.2333	-149.6	-36.4
						15.25	-149.8	-37
						15.2667	-152	-45.8
						15.2833	-154.6	-48.2
						15.3	-151.6	-51.2
						15.3167	-151	-57.4
						15.3333	-151.6	-56.2
						15.35	-151.4	-55
						15.3667	-151.4	-47.8
						15.3833	-151.4	-50.8
						15.4	-148.6	-51.4
						15.4167	-150	-51.4
						15.4333	-150.2	-51
						15.45	-149	-49.8
						15.4667	-144.6	-50.8
						15.4833	-145.2	-51.6
						15.5	-143.8	-48.8
						15.5167	-140.2	-46
						15.5333	-138.8	-44.6
						15.55	-142.8	-48.2
						15.5667	-141.8	-48.6
						15.5833	-140.4	-51
						15.6	-141.6	-52.8
						15.6167	-146.6	-47.6
						15.6333	-152.6	-40.4
						15.65	-158.2	-38
						15.6667	-155	-44
						15.6833	-148.8	-47.8
						15.7	-147.4	-49.2
						15.7167	-143.2	-46.6
						15.7333	-136.8	-45.8
						15.75	-134.2	-45
						15.7667	-138.6	-43.2
						15.7833	-139.6	-42.4
						15.8	-140	-42
						15.8167	-140	-46.6
						15.8333	-145.4	-47.6
						15.85	-147	-50.4
						15.8667	-148.4	-51.8
						15.8833	-148.8	-52.8
						15.9	-146.2	-51.4
						15.9167	-145.6	-47
						15.9333	-146.4	-45.2
						15.95	-149	-46.4
						15.9667	-149.6	-46
						15.9833	-147.4	-53.8
						16	-147.2	-54.6
						16.0167	-145.6	-49.8
						16.0333	-141.6	-46.4
						16.05	-142.2	-47.8
						16.0667	-142.6	-47
						16.0833	-142.8	-45.2
						16.1	-146.2	-44.2
						16.1167	-147.2	-43
						16.1333	-145.2	-39.4
						16.15	-146.6	-42.2
						16.1667	-149.4	-45.8
						16.1833	-153.4	-47.4
						16.2	-158.4	-46.4
						16.2167	-154.4	-48.2
						16.2333	-155.8	-48
						16.25	-151.2	-47
						16.2667	-144.8	-48.4
						16.2833	-143.2	-45.2
						16.3	-143.4	-43.2
						16.3167	-145	-42.2
						16.3333	-144.6	-44.4
						16.35	-144	-47.6
						16.3667	-147	-53.4
						16.3833	-150.8	-50.8
						16.4	-152.6	-49.2
						16.4167	-149.2	-48.2
						16.4333	-146.4	-51
						16.45	-148.6	-51.4
						16.4667	-154.6	-56.6
						16.4833	-151.2	-59
						16.5	-151.2	-53.2
						16.5167	-150	-48
						16.5333	-145.6	-45.8
						16.55	-149.4	-43.6
						16.5667	-155	-46.2
						16.5833	-162	-47.6
						16.6	-162	-52.2
						16.6167	-156.8	-48.8
						16.6333	-153.8	-49
						16.65	-150.2	-51
						16.6667	-149.4	-47.8
						16.6833	-149.6	-42.2
						16.7	-145.8	-36.2
						16.7167	-146.6	-31.2
						16.7333	-146.2	-28.8
						16.75	-143.8	-29.4
						16.7667	-141.8	-32.4
						16.7833	-143	-37.8
						16.8	-141	-41.2
						16.8167	-140.6	-41.8
						16.8333	-139	-37.8
						16.85	-139.2	-33.8
						16.8667	-139.4	-31.6
						16.8833	-139.6	-31.2
						16.9	-145.6	-32
						16.9167	-144	-37.6
						16.9333	-142.4	-41.2
						16.95	-146.6	-42.6
						16.9667	-147.4	-45.4
						16.9833	-145.6	-45.4
						17	-147.4	-46.6
						17.0167	-149	-50.8
						17.0333	-145.6	-54.4
						17.05	-146.2	-54.8
						17.0667	-144.2	-49.4
						17.0833	-145.4	-44.6
						17.1	-146.6	-42.2
						17.1167	-149.6	-44.8
						17.1333	-150.8	-44
						17.15	-149.4	-47.2
						17.1667	-148.2	-43.4
						17.1833	-146.2	-45.4
						17.2	-144.2	-45.2
						17.2167	-146	-42.2
						17.2333	-150.8	-41.8
						17.25	-149.6	-46.6
						17.2667	-149.8	-43.2
						17.2833	-147.6	-38
						17.3	-144	-38
						17.3167	-144.2	-39.8
						17.3333	-145.6	-44
						17.35	-147.2	-49
						17.3667	-141.8	-50
						17.3833	-138.8	-49.6
						17.4	-140.6	-53.6
						17.4167	-149.6	-55.2
						17.4333	-153	-60
						17.45	-154.6	-57
						17.4667	-154	-54
						17.4833	-153	-49.2
						17.5	-150.2	-45.2
						17.5167	-148.2	-50.8
						17.5333	-148.2	-52.6
						17.55	-148.6	-54
						17.5667	-145.2	-59.6
						17.5833	-146	-58.4
						17.6	-149	-60.4
						17.6167	-149.4	-57.6
						17.6333	-149.8	-50.2
						17.65	-150.8	-49
						17.6667	-154.6	-50
						17.6833	-153.2	-51.4
						17.7	-146.8	-51.8
						17.7167	-139.2	-57.2
						17.7333	-141	-53.4
						17.75	-144.4	-45
						17.7667	-142.2	-42.6
						17.7833	-142	-40.8
						17.8	-141.6	-44.4
						17.8167	-142	-49.2
						17.8333	-141.8	-49.4
						17.85	-142.6	-49.2
						17.8667	-144.6	-44.8
						17.8833	-143.2	-47
						17.9	-145.4	-45
						17.9167	-151.6	-47
						17.9333	-152.4	-45.8
						17.95	-146.2	-46.2
						17.9667	-143.6	-46
						17.9833	-141.6	-43
						18	-140	-45.6
						18.0167	-142.6	-51
						18.0333	-144.2	-49.4
						18.05	-143.2	-50.6
						18.0667	-144.8	-53.4
						18.0833	-143.6	-55.2
						18.1	-136.2	-52.6
						18.1167	-138	-51.8
						18.1333	-142	-51.8
						18.15	-139.6	-55.6
						18.1667	-140.4	-54.4
						18.1833	-144.4	-54.8
						18.2	-144.2	-53.6
						18.2167	-145.8	-52.6
						18.2333	-145.4	-50.8
						18.25	-141.2	-50.4
						18.2667	-143.8	-53.8
						18.2833	-146	-53
						18.3	-144.6	-52.8
						18.3167	-149.2	-52.4
						18.3333	-148.4	-53.2
						18.35	-149.2	-55.8
						18.3667	-154.6	-55.8
						18.3833	-154	-55.8
						18.4	-155	-57.6
						18.4167	-152.6	-60.8
						18.4333	-151.8	-56.6
						18.45	-151.4	-52.2
						18.4667	-150.2	-53.6
						18.4833	-155.6	-52.8
						18.5	-156.6	-46.6
						18.5167	-157.4	-46
						18.5333	-149.6	-50.2
						18.55	-146.8	-58.8
						18.5667	-148.4	-54.8
						18.5833	-150.4	-52.6
						18.6	-148.2	-55.6
						18.6167	-149.6	-56.2
						18.6333	-153	-54.6
						18.65	-152.4	-52.2
						18.6667	-147	-55.2
						18.6833	-142.4	-57.2
						18.7	-145.4	-56.8
						18.7167	-145.2	-55
						18.7333	-144.6	-53
						18.75	-143.6	-54.2
						18.7667	-144.2	-54.4
						18.7833	-149.4	-54.2
						18.8	-153.4	-52
						18.8167	-152.6	-51.4
						18.8333	-151.2	-52.6
						18.85	-150.2	-53.8
						18.8667	-145	-57.8
						18.8833	-148.8	-63.6
						18.9	-145.4	-58.6
						18.9167	-146	-58.4
						18.9333	-151.6	-60.2
						18.95	-150.8	-61
						18.9667	-148	-59.2
						18.9833	-150	-58.6
						19	-151.2	-56
						19.0167	-151	-52
						19.0333	-153.4	-55.8
						19.05	-155.2	-63
						19.0667	-154.8	-70.2
						19.0833	-149.6	-73.6
						19.1	-146.4	-71.4
						19.1167	-146.4	-68.8
						19.1333	-147.8	-67.2
						19.15	-146.2	-67.4
						19.1667	-148	-66.4
						19.1833	-153.4	-67.2
						19.2	-154.4	-68.6
						19.2167	-155.6	-66.2
						19.2333	-156.6	-65.4
						19.25	-155.2	-66.8
						19.2667	-148.8	-61.4
						19.2833	-148	-59.8
						19.3	-146.8	-65
						19.3167	-149.8	-60.8
						19.3333	-149.8	-63.2
						19.35	-151.4	-64.6
						19.3667	-155.2	-64.2
						19.3833	-158.6	-65.4
						19.4	-155	-65.4
						19.4167	-153	-63.2
						19.4333	-151	-61.2
						19.45	-148	-62.8
						19.4667	-149.2	-64.4
						19.4833	-154.8	-64.6
						19.5	-154.6	-61.8
						19.5167	-157	-62
						19.5333	-159.2	-66.2
						19.55	-160.2	-69.6
						19.5667	-161	-66.6
						19.5833	-158.4	-65.2
						19.6	-157	-67
						19.6167	-160.2	-69.8
						19.6333	-164	-69.2
						19.65	-162	-69.2
						19.6667	-157.8	-68.6
						19.6833	-155.4	-61.8
						19.7	-157.6	-56.8
						19.7167	-162.2	-58.4
						19.7333	-171.2	-56.6
						19.75	-168.2	-58
						19.7667	-160.4	-58.6
						19.7833	-151.2	-60.8
						19.8	-149.4	-61
						19.8167	-152	-64
						19.8333	-154.4	-70
						19.85	-153.4	-70.6
						19.8667	-155.2	-68
						19.8833	-156.4	-70.4
						19.9	-158.8	-71.8
						19.9167	-159.4	-69.6
						19.9333	-157.2	-65.8
						19.95	-157	-67
						19.9667	-158.2	-70.6
						19.9833	-154.8	-72.6
						20	-152.6	-71.8
