# Supplementary material for: Coral anthozoan-specific opsins employ a novel chloride counterion for spectral tuning
Source: eLife. 2025 Sep 1;14:RP105451. doi: 10.7554/eLife.105451 (PMC12401545; doi:10.7554/eLife.105451)
Supplement: Figure 2—figure supplement 2—source data 1. [file elife-105451-fig2-figsupp2-data1.xlsx]

## Sheet: Sheet1
wavelength [nm]	A_left_curve1_Antho2a_WT_140Cl_pH6_5_dark	A_left_curve2_Antho2a_WT_140Cl_pH6_5_O56_2m	A_right_curve1_Antho2a_WT_140Cl_pH7_5_dark	A_right_curve2_Antho2a_WT_140Cl_pH7_5_O56_2m	B_left_curve1_Antho2a_E292A_140Cl_pH5_dark	B_left_curve2_Antho2a_E292A_140Cl_pH5_O56_2m	B_middle_curve1_Antho2a_E292A_140Cl_pH6_5_dark	B_middle_curve2_Antho2a_E292A_140Cl_pH6_5_O56_2m	B_right_curve1_Antho2a_E292A_140Cl_pH7_4_dark	B_right_curve2_Antho2a_E292A_140Cl_pH7_4_O56_2m
750	-0.00043119	-0.00061721	-0.000900743	-0.00041036	0.000329373	0.000658931	0.000116194	4.5506e-05	0.000211234	-0.000520842
749	-0.0004795	-0.00085085	-0.00101831	-0.000372801	0.000254494	0.000537605	6.5153e-05	7.5937e-05	0.000223371	-0.000531018
748	-0.00046152	-0.00083196	-0.00107087	-0.000191901	0.000284885	0.000490642	0.00015886	-2.2146e-05	0.000178685	-0.000624666
747	-0.00040821	-0.0007635	-0.000972711	-2.71958e-05	7.95336e-05	0.000330788	-7.6091e-05	-0.000157015	0.000106737	-0.000676182
746	-0.0004996	-0.0008265	-0.000937252	-0.000118705	0.000182625	0.000354725	-0.000390177	-0.000244564	0.000168013	-0.000639159
745	-0.0002812	-0.00064445	-0.000882944	-0.000319107	0.000113706	0.000434315	-0.000225492	-0.000215421	0.000148749	-0.000566854
744	-0.00035024	-0.00063932	-0.000877202	-0.000466964	9.27789e-05	0.000460509	-0.000209177	6.3622e-05	0.000149403	-0.000572892
743	-0.00049534	-0.00087067	-0.00094042	-0.000155016	0.000199335	0.000329026	-0.000165383	0.000118999	0.000186367	-0.000682993
742	-0.00042466	-0.00077918	-0.000796127	-6.69713e-05	0.000103193	0.000347934	-2.2654e-05	-5.9051e-05	0.000196128	-0.000672282
741	-0.00043004	-0.00054094	-0.000941944	-0.000215422	-0.00011388	0.000292636	-0.000145446	-3.8896e-05	0.000196583	-0.000787391
740	-0.00035984	-0.00039138	-0.000751382	-0.000217501	0.000123685	0.000334926	-9.882e-05	4.4734e-05	0.00029813	-0.0007865
739	-0.00029807	-0.00027103	-0.000611306	-0.000183071	0.000129505	0.000415289	-5.6055e-05	1.5234e-05	0.000167281	-0.000741815
738	-0.00029236	-0.00023183	-0.000808402	-0.000244051	0.000242853	0.00043089	1.6785e-05	-3.3788e-05	0.000177319	-0.000695625
737	-0.00036799	-0.00028776	-0.000787237	-0.000351261	-6.79072e-05	1.48209e-05	-0.000187874	-0.000211679	-0.000140054	-0.000875396
736	-0.0003422	-0.00035147	-0.000798542	-0.000365179	1.9405e-05	0.000279965	-5.8945e-05	-0.000242763	-0.000127106	-0.000740568
735	-0.00031792	-0.00066777	-0.00114884	-0.000471419	9.23433e-05	0.000392362	-7.122e-05	-4.6083e-05	-3.54774e-05	-0.000617539
734	-0.00043022	-0.00059741	-0.000905613	-0.000200197	-2.69833e-05	0.000331362	-0.000235886	-0.000204472	-0.000176246	-0.000716235
733	-0.00042866	-0.00052772	-0.000857542	-0.000167549	-3.54373e-05	0.00023025	-0.000150237	-6.7604e-05	-5.92754e-05	-0.00060562
732	-0.00045386	-0.00053281	-0.000877638	-0.000244763	-6.37098e-05	0.000427029	-0.000291698	6.4711e-05	7.08217e-05	-0.000639594
731	-0.00038837	-0.00046644	-0.000546901	-0.000428396	8.76708e-05	0.00066	-0.000179776	0.000107199	0.000123763	-0.000466752
730	-0.00014158	-0.00042288	-0.000657021	-0.000631768	0.000125645	0.000551028	-0.000154592	1.6263e-05	-4.74358e-05	-0.000728094
729	-0.0001884	-0.000205	-0.00105462	-0.000632125	0.000132139	0.000401707	-0.000196863	-8.9739e-05	-3.09237e-05	-0.000921884
728	-0.00049231	-0.00050346	-0.000880845	-0.000370327	0.000214818	0.000380166	-4.9204e-05	5.9424e-05	3.1066e-05	-0.000669411
727	-0.000676121	-0.00056027	-0.000739859	-0.000320691	0.000246892	0.000509332	9.982e-05	0.000188413	0.000213372	-0.000524821
726	-0.00052977	-0.0005139	-0.000465133	-0.000426634	0.000225291	0.000516935	2.6605e-05	-4.0183e-05	9.92922e-05	-0.000663234
725	-0.00036299	-0.00029896	-0.00071808	-0.00063553	0.000209076	0.000426871	-6.1658e-05	1.4402e-05	-5.38505e-05	-0.000634328
724	-0.000610073	-0.00048244	-0.000982294	-0.000547287	0.000198009	0.000371375	7.6755e-05	0.000172693	0.000180625	-0.00055547
723	-0.00028724	-0.00037178	-0.000936994	-0.00029133	3.16406e-05	0.000533031	-0.000186785	-5.9269e-05	0.000164984	-0.000550619
722	-0.00021244	-0.00048879	-0.000885894	-0.000406558	1.34654e-05	0.000511292	-0.000149643	-0.000166003	9.09372e-05	-0.000711246
721	-0.00029438	-0.00075237	-0.000977126	-0.000411251	-8.12911e-05	0.000201344	-0.000128557	8.4787e-05	-1.57381e-05	-0.000843917
720	-0.00014332	-0.00049424	-0.0010664	-0.000632224	-0.000135381	0.000384165	-3.1306e-05	0.000191303	1.19603e-05	-0.000717225
719	-0.00019507	-0.00046137	-0.00117838	-0.000838941	1.88316e-06	0.00039749	-2.8237e-05	-5.9605e-05	-4.22683e-05	-0.000824652
718	-0.00034273	-0.00056892	-0.00115373	-0.000548238	0.000116913	0.000545901	4.484e-05	0.000106367	-6.40073e-05	-0.000900937
717	-0.00019709	-0.00041837	-0.00106541	-0.000312119	0.000108915	0.000471636	-4.7878e-05	0.000182057	7.49794e-05	-0.000754545
716	-0.00024764	-0.00044423	-0.000875421	-0.000215422	0.000187496	0.000518083	0.00012344	0.000124839	0.000121764	-0.000658641
715	-0.00033681	-0.00046407	-0.000881083	-0.000214947	6.46054e-05	0.000477694	-7.5715e-05	-4.8221e-05	-0.000125086	-0.000771929
714	-0.00028003	-0.00036822	-0.000932896	-0.000332491	-0.000111167	0.000397648	-0.000123568	-0.000138998	-0.000121146	-0.000862488
713	-0.00043695	-0.00044106	-0.00104213	-0.000380127	1.42771e-05	0.000473596	-1.3309e-05	0.000122543	0.000252395	-0.000577011
712	-0.00032337	-0.00047389	-0.00102502	-0.000216669	7.83259e-05	0.000634222	-4.2294e-05	4.6852e-05	0.000221925	-0.000544184
711	-0.00050484	-0.00041809	-0.00095804	-9.83236e-06	0.000137564	0.000708131	0.000113383	0.000188175	0.000306446	-0.000450339
710	-0.00037229	-0.00042916	-0.000561315	6.40167e-05	0.000229271	0.000585201	0.000128667	0.000197421	0.000277936	-0.000430718
709	-0.00038276	-0.00017061	-0.000399163	-0.000135891	0.000221431	0.000568827	1.6785e-05	6.8552e-05	5.9972e-05	-0.000467861
708	-0.00016351	-0.00019152	-0.000572144	-6.5328e-05	0.000307753	0.000773348	0.000189667	0.000286357	0.000269066	-0.000592038
707	-0.00014991	-0.00018653	-0.000573986	-0.00021659	0.000124991	0.000596051	-6.4885e-05	0.000148261	0.000180209	-0.000588296
706	-0.00016781	-6.22302e-05	-0.000577648	-0.000373296	0.000196762	0.000536061	-0.000197239	2.2421e-05	3.85499e-05	-0.000488511
705	-0.00021778	-0.00021702	-0.00070828	-0.000290756	0.000409954	0.000580984	8.901e-05	0.000235395	2.13844e-05	-0.000449943
704	-0.00014936	-0.00034209	-0.000512649	-8.12858e-05	7.03668e-05	0.000443759	-5.3659e-05	0.00018471	-8.99633e-05	-0.000621023
703	0.0001127	-0.00019031	-0.000838912	-0.000221698	9.60259e-05	0.000558295	8.0319e-05	0.000159131	9.98466e-05	-0.000593899
702	8.644e-05	-0.00025574	-0.00101718	-0.000200216	0.000404925	0.000646993	0.000304044	0.000186869	0.000277837	-0.000283475
701	-0.00011653	-0.00028782	-0.000662308	-0.000231162	0.000571689	0.000565145	7.5409e-05	0.000205638	0.000129881	-0.00027128
700	-4.478e-05	-0.00012883	-0.000702202	-0.000209957	0.000493722	0.000473239	-5.9896e-05	0.000217655	0.000226479	-0.000455882
699	-1.758e-05	-0.00015006	-0.000746155	4.56633e-05	0.000267284	0.000412398	-0.000145386	0.000156557	0.00023224	-0.000521951
698	0.00017655	-0.00015315	-0.00052243	-0.000121358	0.00023919	0.000500106	-0.000163205	0.000178771	0.000253267	-0.000398486
697	-4.674e-05	-0.00022769	-0.000632273	-0.000109182	0.000349726	0.000464073	-6.4726e-05	0.000252659	0.000208838	-0.000410009
696	-7.903e-05	-0.00038992	-0.000758707	-0.000159154	0.000310584	0.000533368	-2.9445e-05	0.00023884	0.000105588	-0.000534265
695	1.786e-05	-0.00030421	-0.000683373	-0.000245694	0.000177715	0.000564967	-0.000125231	-6.5862e-05	7.24254e-05	-0.000544442
694	-1.182e-05	-0.00034751	-0.000694599	-0.000308753	0.000176725	0.000493909	-8.502e-05	4.606e-05	-1.86683e-05	-0.000618845
693	0.0001652	-0.00013394	-0.000852157	-0.000330036	0.000324107	0.000495454	-2.0278e-05	0.000277309	6.41892e-05	-0.000665075
692	-2.43e-06	1.4402e-06	-0.000980947	-0.00049783	0.000183556	0.000253633	-0.000256239	0.000155507	-2.20539e-05	-0.000623122
691	5.102e-05	0.00023641	-0.00105767	-0.000280955	0.000199355	0.000645072	-4.1166e-05	0.000122285	0.000303021	-0.000508547
690	0.00034498	0.00063906	-0.000948953	-0.00017529	8.31765e-05	0.000761528	-3.0356e-05	0.000204568	0.00036893	-0.000315054
689	0.00035911	0.00060166	-0.00078504	-0.000284895	0.000154848	0.000751668	0.000223938	0.000252303	0.000417219	-0.000351227
688	4.566e-05	0.00041256	-0.000775833	-0.000261493	0.000248357	0.000658258	0.000198675	0.000401147	0.000547297	-0.000418166
687	-0.00011808	0.00042666	-0.000948141	-0.00027367	0.000309456	0.000794255	5.3769e-05	0.000492147	0.000390075	-0.00036562
686	-9.457e-05	0.00041844	-0.000927511	-0.000371416	0.00042702	0.000895803	0.000213366	0.000436427	0.00041617	-0.000381024
685	-3.554e-05	0.0005342	-0.000862472	-0.00038672	0.000551039	0.00109676	0.000352234	0.000447897	0.000639182	-0.000193391
684	1.483e-05	0.00053343	-0.000881934	-0.000297824	0.000419021	0.0010278	0.000292877	0.000310507	0.000585825	-0.000243482
683	0.00013992	0.00030604	-0.000903436	-0.00032176	0.000184843	0.000753985	0.000360569	0.000213933	0.000405103	-0.000369323
682	-0.00033277	8.98399e-05	-0.000978057	-0.000391274	0.000275501	0.00075149	0.000476886	0.000213696	0.000219886	-0.000416325
681	-0.00033442	0.00031933	-0.000666188	-0.000378622	0.000554029	0.000712704	0.000311053	0.000353037	0.000423812	-6.78679e-05
680	-0.0004227	1.027e-05	-0.000759479	-0.000395867	0.000582598	0.000532517	0.000280978	0.000412967	0.000489168	8.5849e-05
679	-0.00030632	-0.00037364	-0.000936163	-0.000318078	0.000534547	0.000673067	0.000377101	0.000352607	0.000287934	-0.000168782
678	3.045e-05	-7.25902e-05	-0.000873896	-0.000265235	0.000533676	0.000561502	0.000195844	0.000359807	0.000178922	-0.000448299
677	6.906e-05	-8.66802e-05	-0.000728396	-0.000204731	0.000687591	0.000590606	9.1465e-05	0.000411427	0.000386036	-0.000248669
676	-5.12e-06	1.93998e-05	-0.000982036	-0.000268344	0.000306822	0.000601555	0.000231244	0.000337437	0.000391204	-0.000285317
675	-0.00016627	-6.33799e-05	-0.000970276	-0.000141038	5.64087e-05	0.000535625	0.000126351	0.000239751	0.000374355	-0.00051514
674	-7.341e-05	3.02502e-05	-0.00105385	-0.000189446	0.000140731	0.000557641	8.0655e-05	0.00019754	0.000264294	-0.000422086
673	-3.522e-05	0.00022202	-0.000867877	-0.000128169	0.000305139	0.000624284	0.00019137	0.000127809	0.000123011	-0.00033416
672	-1.914e-05	0.00021505	-0.000774289	0.000126778	0.000300487	0.000621175	0.000239758	4.6971e-05	0.000144512	-0.000503478
671	0.00015778	0.00011627	-0.00100744	2.6221e-05	0.000489208	0.000742046	0.000192577	0.000309427	0.000270293	-0.00055248
670	6.29e-05	9.54302e-05	-0.00116254	-0.000272759	0.000442978	0.000694985	0.000216613	0.000521087	0.000336797	-0.000477324
669	-6.775e-05	9.60602e-05	-0.000950913	-0.000308713	0.000430564	0.000648359	0.00011564	0.000352817	0.000314999	-0.000465089
668	1.04201e-05	0.00027563	-0.000896189	-0.000301071	0.000418032	0.000782336	7.5013e-05	0.000464837	0.000295695	-0.00039514
667	5.338e-05	0.00023109	-0.000964079	-0.000197464	0.00049883	0.000926847	0.000208396	0.000473337	0.00034929	-0.000156804
666	-6.614e-05	0.00019757	-0.000990748	-0.000189347	0.000652488	0.000983629	0.000307489	0.000396837	0.000466835	-0.000156744
665	5.455e-05	0.00034441	-0.000952041	-0.000297765	0.000537338	0.000958109	0.000329149	0.000509667	0.000588834	-5.08213e-05
664	0.00028431	0.00026542	-0.000773121	-0.000248406	0.000385799	0.000756717	1.1083e-05	0.000272102	0.000245802	-0.000254688
663	0.00026172	0.00029478	-0.000935272	-0.000415685	0.000427337	0.000839733	4.6701e-05	0.000358087	0.000236042	-0.000260172
662	0.00035452	0.00036196	-0.000871025	-0.000338926	0.000206206	0.000605138	2.8763e-05	0.000184295	-4.22881e-05	-0.00040595
661	0.00014814	0.00018612	-0.000692778	-8.9423e-05	0.000343371	0.000728603	0.000233422	0.000408157	0.00021854	-0.000294701
660	7.255e-05	9.52099e-05	-0.000794068	-0.00012609	0.000273026	0.000785168	5.4877e-05	0.000371297	0.000138137	-0.000391022
659	-3.55e-05	-5.03898e-05	-0.000630828	-0.000184575	0.000462301	0.000843158	0.000175709	0.000475557	0.000364872	-0.00025053
658	0.00033296	0.00030337	-0.000834239	-0.000351458	0.000727109	0.000827319	0.000365816	0.000543937	0.000437335	-0.000115108
657	0.00041172	0.00045624	-0.000981838	-0.000474943	0.000833764	0.000675087	0.000350135	0.000354697	0.000447848	-0.000253698
656	0.00021747	0.00030131	-0.000965544	-0.000465598	0.000649181	0.000670672	0.000179609	0.000261846	0.000397797	-0.000365561
655	0.00011618	0.00022913	-0.000759321	-0.000192178	0.000475467	0.000682967	0.000119005	0.000306747	0.000288548	-0.000346
654	3.237e-05	0.00048902	-0.000770884	-0.000247674	0.000525142	0.000978957	0.000312537	0.000551637	0.000430346	-0.000186244
653	4.528e-05	0.00044372	-0.000726693	-0.000321226	0.000584895	0.000866283	0.000460018	0.000638877	0.000555711	-0.000230435
652	-1.635e-05	0.00019155	-0.000667317	1.49358e-05	0.000487723	0.000685897	0.00042927	0.000496757	0.000383126	-0.000325488
651	-6.236e-05	0.00020566	-0.000727188	-0.000117458	0.000423635	0.000698291	0.000306222	0.000436277	0.000319137	-0.000255342
650	0.00014897	0.00041684	-0.000884845	-0.000367476	0.000436939	0.00085278	0.00027003	0.000460807	0.000259998	-0.000115761
649	0.0003309	0.00050983	-0.000921829	-0.000327641	0.000447749	0.00101636	0.000273455	0.00022011	0.000189515	-0.00016997
648	0.00044599	0.00045176	-0.00072889	-4.83606e-05	0.000449967	0.000907919	0.000219959	0.000303287	0.000301971	-0.000322439
647	0.00048931	0.00058414	-0.000755876	-0.0002687	0.000586696	0.00113493	0.000454672	0.000514957	0.000612474	-0.000185017
646	0.00052875	0.00051043	-0.00057947	-0.000111301	0.00077906	0.00115002	0.000503813	0.000491157	0.000759004	5.09044e-05
645	0.00030587	0.00048922	-0.000359942	-2.04049e-05	0.000642766	0.000890021	0.000262249	0.000372777	0.000559592	-3.38363e-06
644	0.0002028	0.00070726	-0.000614375	-0.000245674	0.000465588	0.00080851	0.00033093	0.000449137	0.00037879	-0.000223466
643	0.00029483	0.00050908	-0.000850593	-0.000104034	0.000416943	0.00080851	0.00051981	0.000540847	0.000689214	-0.000135857
642	0.00036871	0.00046437	-0.00100789	-0.000362348	0.000489089	0.000908791	0.000388327	0.000575277	0.000601466	-0.000176266
641	0.00028419	0.00059019	-0.000757262	-0.000454115	0.000704558	0.00102588	0.000388802	0.000577697	0.000533477	-0.000124076
640	0.0003507	0.00063989	-0.000480001	-0.000243496	0.000600259	0.000730246	0.000261536	0.000384277	0.000237883	-0.00029581
639	0.0003739	0.00065969	-0.000441948	-0.000245318	0.000836199	0.000891823	0.000333504	0.000505707	0.000522984	-0.00021713
638	0.00033785	0.00064619	-0.000849405	-0.000301843	0.000940558	0.000941716	0.000451405	0.000603277	0.000573827	-5.57709e-05
637	0.00030742	0.00055008	-0.000872371	-9.6214e-05	0.000546743	0.000833635	0.000363578	0.000491947	0.000421397	-0.000134134
636	0.00031882	0.00042973	-0.000825409	-3.63032e-05	0.000610297	0.000792968	0.000472828	0.000493507	0.000505937	-0.000265736
635	0.00030956	0.00055052	-0.000935767	-0.000121536	0.000604495	0.000905167	0.0005345	0.000472697	0.00062859	-0.000376371
634	0.00017898	0.00066222	-0.000806937	-0.000288756	0.000503403	0.000740561	0.000544915	0.000521247	0.000503443	-0.0003991
633	0.00025889	0.00077965	-0.000515104	1.63415e-05	0.000549792	0.000716506	0.000401928	0.000503547	0.000433434	-0.000224792
632	0.00033876	0.00074674	-0.000411062	-9.82371e-07	0.000464756	0.000815143	0.000318754	0.000518677	0.000374137	-0.000268884
631	0.00053752	0.00069428	-0.000481466	0.000134183	0.000390294	0.000888913	0.000353382	0.000534907	0.000112082	-0.000497559
630	0.00041659	0.00062914	-0.000505522	0.000152319	0.000448799	0.00100852	0.000251102	0.000523707	8.98087e-05	-0.000187808
629	0.00064659	0.00071665	-0.000729128	-8.26519e-05	0.00080072	0.00108185	0.000426934	0.000549737	0.000518747	-1.77574e-05
628	0.00064457	0.00082247	-0.000813312	-0.000143355	0.000746591	0.00100006	0.000540796	0.000684587	0.000560859	-0.000132491
627	0.00051243	0.00077529	-0.000648231	-8.84133e-05	0.000710795	0.000981472	0.000476649	0.000752897	0.000595249	-9.84965e-05
626	0.00058375	0.00095015	-0.000572778	3.43385e-05	0.000819549	0.0011029	0.000577365	0.000834187	0.000629402	-8.18458e-05
625	0.00063507	0.00081519	-0.00038079	9.44077e-05	0.000685155	0.000982481	0.000625119	0.000612757	0.000662604	-0.000255916
624	0.00054892	0.00094348	-0.000764132	-0.000113657	0.000815767	0.00103418	0.000677546	0.000585277	0.000577826	-0.000159892
623	0.00075346	0.00099951	-0.000881281	-0.000321068	0.000947072	0.00115022	0.000784162	0.000738817	0.000775932	-8.76666e-05
622	0.00062259	0.00082037	-0.000826379	-8.33251e-05	0.000980928	0.00122953	0.000799545	0.000753887	0.000855661	7.57715e-05
621	0.00060131	0.0008863	-0.00058636	-6.90502e-05	0.000984194	0.00116754	0.000948332	0.000563257	0.000675632	5.75171e-05
620	0.0007363	0.00107006	-0.000879044	-7.59508e-06	0.00087843	0.00109955	0.000747356	0.000721787	0.000703825	-0.000129858
619	0.00083935	0.00108395	-0.000733464	-0.000138108	0.000821825	0.000982758	0.000686752	0.000738497	0.000835803	-0.000117483
618	0.00081729	0.00101086	-0.000737859	-0.000314633	0.00080472	0.0010908	0.000653807	0.000598167	0.00081642	-0.000116256
617	0.00070527	0.0009951	-0.000776724	-0.000276322	0.000975384	0.000884893	0.000503258	0.000681377	0.000759222	-0.000178265
616	0.00058771	0.00120504	-0.000581945	0.000111613	0.00104975	0.00110222	0.000810415	0.000923397	0.000847227	-0.000139341
615	0.00102589	0.00150624	-0.000521301	6.69271e-05	0.000930877	0.00108567	0.000761948	0.000955417	0.000793454	-0.000250412
614	0.0012452	0.00129626	-0.000487624	2.60824e-05	0.000686917	0.00082037	0.000621714	0.000786467	0.000621185	-0.000272329
613	0.00124635	0.00117233	-0.0003621	7.77175e-05	0.000644034	0.000888339	0.000628524	0.000743247	0.000509283	-0.000256114
612	0.00108879	0.00118291	-0.000294785	3.06955e-05	0.00077809	0.00107367	0.000558972	0.000926267	0.000580479	-0.000191392
611	0.00113308	0.00131132	-0.000573293	1.26369e-07	0.000921294	0.000927183	0.000661053	0.000879407	0.000638786	-0.000257163
610	0.00128458	0.00150321	-0.000585805	-5.85767e-05	0.00107513	0.00106269	0.00070863	0.000959807	0.000735127	-0.000270963
609	0.00114423	0.00136403	-0.000725366	-0.000225242	0.00103038	0.00106086	0.000894223	0.0010336	0.000825052	6.62285e-05
608	0.00098796	0.00122274	-0.000648765	-7.60391e-05	0.00120319	0.00115713	0.000998047	0.000989347	0.000900683	0.00015459
607	0.00116038	0.00135169	-0.000686838	-0.000188654	0.00120737	0.00108751	0.000842112	0.000941197	0.000845108	-0.000202321
606	0.00150237	0.00147232	-0.000716694	-0.00013395	0.00125215	0.00115473	0.00105948	0.0010163	0.000961228	-0.000161595
605	0.00139373	0.00139406	-0.000590122	-7.2416e-05	0.00124108	0.00115	0.000989197	0.000845017	0.00100973	3.66493e-05
604	0.00157762	0.00154887	-0.000545733	-0.000218392	0.00116349	0.00134543	0.00115271	0.000994657	0.00100623	9.44614e-05
603	0.00155006	0.00165079	-0.000688541	-2.46022e-05	0.00109776	0.00147212	0.00110413	0.000965767	0.00105953	3.32814e-06
602	0.00139914	0.00153443	-0.000539853	6.27496e-05	0.00138375	0.0012913	0.00117331	0.000924167	0.0010667	-8.29149e-05
601	0.00128151	0.00145805	-0.00017922	0.000108148	0.00117307	0.00115649	0.00128085	0.000959157	0.000977878	-3.9338e-05
600	0.00151848	0.00162438	-0.000209611	0.000218704	0.00120198	0.00124541	0.00118707	0.00103291	0.000885062	-2.64887e-05
599	0.00149053	0.00156508	-0.000464816	3.30318e-05	0.00133103	0.00123387	0.00138745	0.00131565	0.00110059	5.19141e-05
598	0.00154929	0.00143269	-0.000290152	8.18355e-05	0.00122809	0.00125578	0.0014746	0.00123185	0.00102124	9.26994e-05
597	0.0017996	0.00173222	-0.000286172	0.00014733	0.00147576	0.00135519	0.00148507	0.00107235	0.000940756	3.71047e-05
596	0.00205796	0.00200348	-0.000326067	0.000188887	0.00159384	0.00135097	0.00158474	0.00131991	0.00103355	0.000240021
595	0.00216936	0.00204375	-0.000138791	0.000152121	0.00160827	0.0014116	0.00178015	0.00137228	0.00131216	0.000276174
594	0.00205396	0.00193767	-2.81559e-05	9.34177e-05	0.0018271	0.00172529	0.00203112	0.00148462	0.00162094	0.000301536
593	0.00189602	0.00174157	0.000307709	0.000128541	0.00173744	0.00182288	0.00195707	0.00152995	0.00141313	0.000363149
592	0.0021466	0.00184699	2.61122e-06	0.000125076	0.00156109	0.00134094	0.0015401	0.00120777	0.00114656	2.59778e-05
591	0.00208065	0.00171721	0.000188838	0.000187323	0.00170192	0.00133197	0.00165708	0.00115396	0.00122091	3.02543e-05
590	0.00233646	0.00193072	0.000447072	0.000382241	0.00184265	0.00143043	0.00190081	0.00130185	0.00143782	0.000144512
589	0.00242645	0.00189984	0.000185452	0.000322033	0.00197201	0.00162055	0.00227165	0.00151982	0.00170516	0.000397896
588	0.00234551	0.00191407	5.6523e-05	4.43962e-05	0.00212887	0.00160008	0.00241496	0.00148875	0.00164593	0.000551256
587	0.00262305	0.00207442	0.000266092	0.000186254	0.00209864	0.0014191	0.00231131	0.00140251	0.00135316	0.000295933
586	0.00302879	0.00203556	0.00013944	0.00040693	0.00199783	0.00140271	0.00232925	0.0011219	0.00126021	5.36168e-05
585	0.00309038	0.00203875	0.000136114	0.000356879	0.00217697	0.00160212	0.00248643	0.00135416	0.00136688	0.000252
584	0.00322911	0.00203534	0.000295038	0.00059769	0.00227897	0.00177284	0.00263791	0.00168229	0.00140907	0.000363743
583	0.00339989	0.00212849	0.000328478	0.000423422	0.00209941	0.00162875	0.00264969	0.00163986	0.00132531	0.000237071
582	0.00338486	0.00203724	0.000427669	0.000340525	0.00214566	0.0013958	0.00279385	0.00135367	0.00144978	0.00020476
581	0.00345329	0.00203508	0.000600274	0.000358482	0.00231724	0.0012858	0.00298191	0.00151647	0.00157645	0.000248317
580	0.00361869	0.0020744	0.000949443	0.000412315	0.00240055	0.00148561	0.00298445	0.00166692	0.00163304	0.000243526
579	0.00363296	0.00210333	0.000935267	0.000412038	0.00253182	0.0017044	0.00331473	0.0015986	0.00168695	0.000185575
578	0.00394039	0.00219363	0.000991417	0.000589454	0.00253411	0.00178247	0.00335694	0.00155993	0.00184773	0.00019102
577	0.00411945	0.00249057	0.00101478	0.000353691	0.00279189	0.0020482	0.00353812	0.00161228	0.00192125	0.000305951
576	0.00461003	0.00261879	0.00113605	0.000414968	0.00292009	0.00205626	0.00365107	0.00183448	0.00188565	0.000318879
575	0.00452733	0.0024011	0.00130073	0.000688625	0.00323657	0.00207753	0.00387359	0.00190823	0.00209383	0.000481664
574	0.00458441	0.00251961	0.00133393	0.000615232	0.00347202	0.00206169	0.00413392	0.00216616	0.00221813	0.000496474
573	0.00505932	0.00276619	0.00147215	0.000621409	0.00335948	0.0020132	0.00423879	0.00210972	0.00230946	0.000471151
572	0.00547374	0.00288151	0.00157815	0.000691001	0.0036079	0.00213833	0.00457139	0.0022492	0.00250127	0.000784208
571	0.00553346	0.00292943	0.00165089	0.000479037	0.0035524	0.00229246	0.0046081	0.00230446	0.0026006	0.00086958
570	0.00576288	0.00299631	0.00191704	0.000635407	0.00370523	0.00235582	0.00473027	0.00233265	0.00252968	0.00070725
569	0.00612896	0.00305495	0.00190423	0.000662392	0.00396491	0.00232453	0.00500342	0.00248352	0.0025807	0.000629303
568	0.00613415	0.00313254	0.00203053	0.000663243	0.00390604	0.00221618	0.00496867	0.00246334	0.0023627	0.000542149
567	0.00639501	0.00307053	0.00233311	0.00103987	0.00406125	0.00241193	0.0052432	0.00274199	0.00229772	0.00068959
566	0.00674826	0.00337056	0.00255015	0.00093595	0.00447838	0.00238888	0.00529806	0.00272336	0.00253746	0.000661357
565	0.00683651	0.00359361	0.00253324	0.000746061	0.00456407	0.00253296	0.00551232	0.00283801	0.00280066	0.00076724
564	0.00723772	0.00380728	0.0027263	0.000907302	0.00470736	0.00286623	0.00592532	0.00293457	0.00325536	0.00119776
563	0.00766393	0.00404249	0.00311174	0.00111665	0.004778	0.00291238	0.00613857	0.00297391	0.00325207	0.00115795
562	0.00753447	0.00386385	0.00297633	0.00103092	0.00497317	0.0030833	0.00618651	0.00306306	0.00319406	0.00107349
561	0.00779874	0.00386001	0.00303005	0.00101885	0.00515651	0.0030987	0.00636525	0.0029805	0.00354101	0.00118426
560	0.0080228	0.00389752	0.0032586	0.00130482	0.00535172	0.0031459	0.0067434	0.00328301	0.00357873	0.00101787
559	0.00852154	0.00418005	0.00355853	0.00154939	0.00559323	0.0034823	0.00689164	0.00358696	0.00358404	0.00118341
558	0.00890894	0.00450802	0.00384114	0.00137679	0.0056643	0.00353303	0.00728058	0.00365625	0.00356416	0.00134049
557	0.00930634	0.00460566	0.00391422	0.00145026	0.00565254	0.00333629	0.00736542	0.003742	0.00366909	0.00123249
556	0.00953374	0.00469476	0.00385205	0.00153831	0.00588482	0.00342489	0.0077169	0.00387643	0.00388088	0.00115339
555	0.00980824	0.00503096	0.00414507	0.00181863	0.00594703	0.00345777	0.00768479	0.0036969	0.00376828	0.00122976
554	0.0100813	0.00492256	0.00430918	0.00182547	0.00604022	0.00368718	0.00795995	0.00389663	0.00381727	0.00148427
553	0.0101901	0.0048363	0.00456462	0.00176718	0.00611459	0.00370929	0.00802095	0.0039489	0.00392747	0.00119014
552	0.0104864	0.00521245	0.00481587	0.00176866	0.00637122	0.00394951	0.00849545	0.00434238	0.00415353	0.00141818
551	0.0106384	0.00541943	0.00507998	0.00206776	0.00671074	0.00404973	0.0088934	0.00438532	0.0042096	0.00160185
550	0.0111324	0.00556353	0.00510893	0.00259577	0.0069356	0.00427472	0.00897572	0.00465282	0.00444534	0.00177359
549	0.0116492	0.00577573	0.00527435	0.00257722	0.00703445	0.00449138	0.00910422	0.00500601	0.00454029	0.00180214
548	0.0119498	0.00619223	0.00553238	0.00218176	0.00687329	0.00449877	0.00929644	0.00484467	0.0043822	0.0014284
547	0.0121122	0.00647683	0.00564696	0.00221986	0.00708957	0.00464941	0.00965957	0.00499714	0.00478059	0.00149072
546	0.0124882	0.00665413	0.00563856	0.00218418	0.00757969	0.00493998	0.00995659	0.00537345	0.00505999	0.00172047
545	0.0128038	0.00691343	0.0060107	0.00250913	0.00742702	0.0050364	0.00993689	0.00552315	0.00483593	0.00162935
544	0.0131499	0.00713933	0.00615844	0.00286284	0.0074841	0.00513965	0.0101548	0.0056793	0.00472387	0.00164911
543	0.0132894	0.00713633	0.00634603	0.00293249	0.0077833	0.00528711	0.0105992	0.0058818	0.00483939	0.00183079
542	0.013642	0.00741253	0.00645027	0.00342902	0.00796244	0.00560892	0.0107292	0.00605959	0.00492653	0.00187593
541	0.0141442	0.00792883	0.00668385	0.00350134	0.0080784	0.00577249	0.0108067	0.00616817	0.00501901	0.00176664
540	0.014379	0.00822623	0.00672462	0.00324295	0.00823912	0.00588046	0.0111936	0.00632751	0.00539106	0.00197466
539	0.0146496	0.00847563	0.00681179	0.00354326	0.00837126	0.00601556	0.0113362	0.00664086	0.00551328	0.00202683
538	0.0149296	0.00857203	0.00698372	0.0039599	0.00873609	0.00630722	0.0115304	0.0068849	0.00552322	0.00215564
537	0.0154162	0.00907823	0.00689223	0.0038875	0.00908423	0.00656349	0.0118889	0.00737312	0.00571418	0.00232803
536	0.015385	0.00944933	0.00699592	0.00380399	0.009185	0.006751	0.0122883	0.00768912	0.0055781	0.00255965
535	0.0154024	0.00960643	0.00722238	0.00399599	0.00918037	0.00712922	0.0123891	0.00780619	0.00565102	0.00246236
534	0.0158772	0.00993813	0.00753668	0.00437082	0.00911343	0.00730313	0.0124328	0.00780097	0.00567963	0.00219334
533	0.0162604	0.0103737	0.00774237	0.00449268	0.00898122	0.00741792	0.012465	0.00786177	0.0057351	0.00222124
532	0.0167193	0.0106238	0.00797413	0.00454469	0.00939513	0.00766564	0.0127912	0.00809124	0.00590636	0.00243546
531	0.0167774	0.010857	0.00829457	0.00499256	0.00944286	0.00764454	0.0128613	0.00825481	0.00596136	0.00244102
530	0.0168918	0.0113612	0.00827074	0.00531338	0.00945037	0.00784926	0.0128477	0.0085667	0.00583283	0.00242142
529	0.0171482	0.0116051	0.00841154	0.0055708	0.0095946	0.00813515	0.0130623	0.00895984	0.00617093	0.00272545
528	0.0173148	0.011999	0.00844182	0.00581197	0.00992429	0.0083053	0.0134082	0.00939059	0.00647059	0.00287542
527	0.0176337	0.0123718	0.00877628	0.00607614	0.00995759	0.0085274	0.0136033	0.00935849	0.00623213	0.00276235
526	0.017998	0.0127891	0.00900095	0.00615142	0.0101275	0.00873095	0.0137945	0.00962499	0.00638664	0.0027915
525	0.0181862	0.0135661	0.00894258	0.00609056	0.010235	0.00873677	0.0138037	0.00985869	0.00645382	0.00274978
524	0.0179775	0.013665	0.00884064	0.00627668	0.0102817	0.00907992	0.0140335	0.0100857	0.00637185	0.00293436
523	0.0182286	0.014055	0.00891485	0.00665157	0.0105196	0.00961219	0.0141642	0.0104197	0.00660947	0.00321697
522	0.0186173	0.0145556	0.00893445	0.00680945	0.0105891	0.00982411	0.0143861	0.0107177	0.00666614	0.00331699
521	0.0188221	0.0148433	0.0089487	0.00695168	0.0105558	0.00998334	0.0143863	0.010896	0.0067049	0.00311386
520	0.0187032	0.0151439	0.00923216	0.00739454	0.0106431	0.0100121	0.0143683	0.0110337	0.00665158	0.00311043
519	0.0191635	0.0156425	0.00935277	0.00771167	0.0105383	0.0102152	0.0146355	0.011331	0.00677182	0.00323212
518	0.0192677	0.0160467	0.00916944	0.00754633	0.0106493	0.0105972	0.0145823	0.011598	0.00673296	0.00329818
517	0.019414	0.0162182	0.00934662	0.0075943	0.0105725	0.0105566	0.0144789	0.0115581	0.00661644	0.0032105
516	0.0195972	0.0166391	0.00958739	0.00815023	0.010703	0.01084	0.0148291	0.0119648	0.00683203	0.00321721
515	0.0197944	0.0169653	0.00961495	0.00843133	0.0107477	0.0110073	0.0148716	0.0120276	0.00681146	0.00316512
514	0.0198904	0.0174401	0.00953185	0.00832143	0.0109106	0.0113491	0.0149015	0.0124789	0.00686791	0.0035854
513	0.01977	0.0178337	0.00990882	0.00864744	0.0107576	0.0115265	0.0148201	0.0126319	0.00674684	0.00357511
512	0.0197916	0.0183285	0.0100762	0.0089946	0.0108964	0.0117934	0.0151989	0.0128081	0.00690222	0.00347417
511	0.0197567	0.0186648	0.0098049	0.00896972	0.0110886	0.0119384	0.0151977	0.0129421	0.00703766	0.00345135
510	0.0201915	0.0192716	0.0096595	0.00947597	0.0108639	0.0118043	0.0150229	0.0130189	0.00665812	0.00326665
509	0.0201234	0.0197208	0.00988423	0.00948989	0.0108351	0.0119951	0.0149307	0.0133114	0.00670084	0.00313916
508	0.0201058	0.0200288	0.00968878	0.00943061	0.0110114	0.0124699	0.0152427	0.0136741	0.00673543	0.00352401
507	0.0203928	0.020471	0.00967688	0.00968833	0.0112858	0.0127138	0.0150656	0.0137858	0.00698886	0.0038672
506	0.0205124	0.0208584	0.00979349	0.00987481	0.0113561	0.0127369	0.0150021	0.0138547	0.00697583	0.00388219
505	0.020525	0.021325	0.00981931	0.0100355	0.0113927	0.0130828	0.0152823	0.014301	0.00710345	0.00407821
504	0.0204651	0.0214999	0.00978448	0.0102463	0.0112926	0.0129855	0.0152609	0.0143176	0.00699911	0.00397411
503	0.0204589	0.0218807	0.00992686	0.0104046	0.0111544	0.0128881	0.0151684	0.0143065	0.0070334	0.00378307
502	0.0204368	0.0222965	0.0100774	0.0107924	0.0112336	0.0132095	0.0153903	0.0144635	0.00692734	0.00391974
501	0.020533	0.0225719	0.00995198	0.0108646	0.0113924	0.0134564	0.0154063	0.0146751	0.00704578	0.0039615
500	0.0204993	0.0230865	0.0099516	0.011173	0.0115714	0.0138376	0.0154955	0.0150678	0.00733604	0.0042305
499	0.0204179	0.0232854	0.0098614	0.0113657	0.0111687	0.0134562	0.0151932	0.0149584	0.0070647	0.00390006
498	0.0202411	0.0234729	0.00996932	0.0114716	0.0110805	0.0135079	0.0150468	0.0149684	0.00708175	0.00390614
497	0.0203031	0.0236507	0.00981779	0.0116335	0.0112469	0.0139424	0.0151582	0.0153665	0.00723913	0.00419045
496	0.0203782	0.0240395	0.0100573	0.0120628	0.0112414	0.0140742	0.0151337	0.0153871	0.00740801	0.00427444
495	0.0203646	0.0246775	0.00997043	0.0119276	0.0110617	0.0140219	0.0150173	0.0153668	0.0072758	0.00425897
494	0.0205104	0.0249231	0.00947592	0.0118867	0.0112269	0.0141931	0.0150446	0.0154917	0.00728441	0.00404353
493	0.0203279	0.0250205	0.00930009	0.0122212	0.0111226	0.014165	0.0150099	0.0157098	0.00713519	0.00413442
492	0.0201014	0.0251927	0.00938093	0.0124228	0.0110044	0.0140052	0.0148877	0.015664	0.00680496	0.00410793
491	0.0199708	0.0253259	0.00941166	0.0125945	0.01083	0.0141656	0.0147076	0.015513	0.00663864	0.00398989
490	0.0198548	0.0252253	0.00952015	0.0125565	0.0108189	0.0144587	0.0148276	0.0157371	0.0066838	0.00415988
489	0.0197572	0.0255981	0.00948986	0.0127836	0.0109085	0.0146816	0.0148611	0.0160286	0.00692667	0.00426765
488	0.0198196	0.0259027	0.00931232	0.0130082	0.0108302	0.014531	0.0148285	0.0161168	0.0070121	0.00430372
487	0.0198125	0.0264582	0.00930365	0.013248	0.0110033	0.0147499	0.0147494	0.0162036	0.00715035	0.00445484
486	0.0194839	0.0265148	0.00920339	0.0131061	0.0110761	0.0148927	0.0147824	0.0163167	0.00710929	0.00452685
485	0.0192436	0.0264073	0.0093486	0.0131642	0.0105141	0.0146789	0.014619	0.0163183	0.00682894	0.00427735
484	0.0191365	0.0264104	0.00895609	0.0130233	0.0105792	0.0147397	0.0146255	0.016464	0.00682362	0.00441671
483	0.0193769	0.0268039	0.00915485	0.0131943	0.0103331	0.014748	0.0142593	0.0162058	0.00669134	0.00446302
482	0.0195437	0.0272166	0.00911933	0.0133181	0.0102281	0.0145887	0.0141313	0.0159414	0.00647053	0.00424723
481	0.0191096	0.0271077	0.0090786	0.0133962	0.0104469	0.014896	0.0141772	0.0161426	0.00658465	0.00434577
480	0.018907	0.0273677	0.00885206	0.0132681	0.0103217	0.014879	0.0140288	0.0163869	0.006721	0.00422839
479	0.0186497	0.0274922	0.00865321	0.0134631	0.0101992	0.0148685	0.0138428	0.0163131	0.00652846	0.00442103
478	0.018708	0.0276002	0.00863448	0.0136916	0.0100266	0.0148992	0.0135857	0.0164085	0.00640913	0.00429422
477	0.0186275	0.0275173	0.00854657	0.0135792	0.0100424	0.0147488	0.0134181	0.0162372	0.00633679	0.00413412
476	0.018326	0.0275115	0.00847532	0.0135184	0.0103424	0.0150032	0.0137442	0.0163136	0.00674208	0.00434429
475	0.0181421	0.0274204	0.00833772	0.0133815	0.0101166	0.0148792	0.0136856	0.0162419	0.00678273	0.00451515
474	0.0178769	0.0273541	0.00820952	0.0133864	0.0100361	0.0145329	0.0134418	0.016062	0.00651743	0.00454158
473	0.017868	0.0272915	0.00829802	0.0137864	0.00972359	0.0144315	0.0132865	0.015803	0.00626258	0.00434949
472	0.0177446	0.0273707	0.00815268	0.0138164	0.00961115	0.0144678	0.0131711	0.0157095	0.00623688	0.00449486
471	0.0174796	0.0272998	0.00815135	0.0136094	0.00968367	0.0144476	0.0129656	0.01579	0.00600494	0.00464932
470	0.0174464	0.0272743	0.00828931	0.0133523	0.0095179	0.0141218	0.0127438	0.0158483	0.00583647	0.004156
469	0.017316	0.0273218	0.00814521	0.0133107	0.00940295	0.0142744	0.0125342	0.0160106	0.00612179	0.00418055
468	0.0169846	0.0272168	0.00775037	0.0132526	0.00917124	0.0143311	0.0124937	0.0158663	0.00600575	0.00437547
467	0.0168702	0.0270828	0.00753646	0.013241	0.00884464	0.0142185	0.0123825	0.0156197	0.00572372	0.00428741
466	0.0167035	0.027183	0.00735002	0.0133998	0.00893077	0.0142709	0.012399	0.0157222	0.00591143	0.00449886
465	0.0166112	0.0273418	0.00727961	0.0132096	0.0092263	0.014501	0.0124453	0.0159449	0.00607707	0.00461404
464	0.0164681	0.0272318	0.00722228	0.0129486	0.00919322	0.0142304	0.0122964	0.0157637	0.00608483	0.00464703
463	0.0163064	0.0269157	0.00689471	0.0126976	0.00890234	0.0138498	0.0119659	0.0154281	0.00594147	0.00431336
462	0.0160598	0.0267324	0.00697081	0.0128727	0.00880752	0.0138878	0.0118123	0.0155216	0.00588969	0.0042431
461	0.015933	0.0266623	0.00703108	0.0129643	0.00878958	0.0139075	0.0119691	0.0157161	0.00600708	0.00453671
460	0.0159745	0.0267168	0.00692969	0.0129567	0.00849825	0.0137434	0.0117078	0.0155218	0.0059127	0.00449165
459	0.0157776	0.026619	0.00682981	0.012744	0.00839262	0.013581	0.0116087	0.0152252	0.00589157	0.00440226
458	0.015636	0.0265441	0.00658229	0.012497	0.00821338	0.0134039	0.0114124	0.0149453	0.00580852	0.00422767
457	0.0156547	0.026553	0.00642857	0.0123824	0.00829587	0.0134076	0.0112603	0.0150111	0.00594162	0.00439085
456	0.0152357	0.0260522	0.00642304	0.0122304	0.00826341	0.0137355	0.0113572	0.0150704	0.00613718	0.00454196
455	0.0150175	0.0260186	0.00625757	0.0122363	0.00816583	0.013614	0.0113631	0.0150129	0.00597645	0.0043859
454	0.0149171	0.0260006	0.006201	0.0122766	0.00802249	0.0131676	0.0113684	0.0148513	0.00577868	0.00421995
453	0.0149297	0.0259642	0.00604317	0.0121608	0.00808531	0.0130724	0.0112603	0.0148865	0.00573558	0.00445938
452	0.0147849	0.0258246	0.0059338	0.0119131	0.00790122	0.0129341	0.0108402	0.0148015	0.00565357	0.00455164
451	0.0145064	0.0256536	0.0059399	0.0118954	0.0076786	0.0127001	0.0107512	0.0147014	0.00568482	0.00467958
450	0.0144083	0.0248071	0.0062978	0.0120712	0.00805979	0.0128282	0.0110806	0.0148276	0.00578537	0.0047852
449	0.0143657	0.0246896	0.00614549	0.011791	0.00772285	0.0125555	0.0108484	0.0147773	0.00578908	0.00467643
448	0.0141855	0.0243895	0.00579715	0.0115497	0.00766985	0.0123032	0.0107379	0.0145848	0.00590662	0.00461191
447	0.0141624	0.0242514	0.00564785	0.0113562	0.0074094	0.0120944	0.0104716	0.0142943	0.00556727	0.00440141
446	0.0141774	0.024114	0.0054399	0.0115938	0.00744539	0.0122219	0.0107177	0.0143646	0.00584598	0.00464406
445	0.0138558	0.0236438	0.00554505	0.0114924	0.00713174	0.0120038	0.0104653	0.0141809	0.00561033	0.00448654
444	0.0135742	0.0233944	0.00562159	0.0113972	0.0070749	0.0116836	0.0104031	0.0139331	0.00542773	0.00456902
443	0.0136075	0.0233476	0.00541412	0.0109338	0.00698899	0.0115097	0.010414	0.0140626	0.00556181	0.00466374
442	0.0134257	0.0232003	0.00504702	0.0109579	0.0070853	0.0115105	0.0103945	0.014088	0.00568373	0.00485375
441	0.0132167	0.0229704	0.0048303	0.0109187	0.00686214	0.0113975	0.0101719	0.0136807	0.00554979	0.00479049
440	0.01308	0.0225167	0.00503892	0.0107713	0.00700497	0.0115198	0.0103078	0.0139808	0.00575961	0.00485406
439	0.0130007	0.022437	0.00504587	0.0106148	0.00693768	0.0111226	0.0100629	0.0140001	0.00585918	0.0049745
438	0.0128073	0.0224699	0.00526965	0.0107201	0.00688632	0.0110079	0.0103121	0.0140806	0.00615988	0.00528482
437	0.0128562	0.0221708	0.00543337	0.0107303	0.00691758	0.0110533	0.0103018	0.0139992	0.00608374	0.00557929
436	0.0127164	0.0218536	0.00535526	0.0102115	0.00674646	0.0108369	0.0101202	0.0138659	0.00605121	0.00559509
435	0.0124869	0.0213414	0.00505605	0.010091	0.00668881	0.010837	0.0101855	0.0138782	0.00623605	0.00565209
434	0.0123472	0.0212474	0.00508699	0.0101016	0.00646393	0.0104569	0.0100828	0.013748	0.00599257	0.00548
433	0.012447	0.0210223	0.00497758	0.0101934	0.00646427	0.0103342	0.0100733	0.0137593	0.00594915	0.00560101
432	0.0122409	0.0204381	0.00472697	0.00988953	0.00662078	0.0104323	0.0103013	0.0138545	0.00618786	0.00568836
431	0.0123327	0.0202186	0.00471971	0.009623	0.00643689	0.0102174	0.0104222	0.0138008	0.00625312	0.00586809
430	0.0122853	0.0202151	0.00439045	0.00949242	0.00627139	0.0101025	0.0102564	0.0137441	0.00627072	0.00602771
429	0.0121564	0.0200112	0.00428441	0.00941675	0.00617838	0.00997334	0.0101726	0.0136328	0.00613266	0.00582923
428	0.0119385	0.0195575	0.00420078	0.00907172	0.00642517	0.00974377	0.0102202	0.0137937	0.00635191	0.00610562
427	0.011792	0.0193315	0.00429009	0.00899884	0.00655901	0.00980065	0.0102017	0.0138982	0.00673116	0.00630216
426	0.0120145	0.0195149	0.00434743	0.00919511	0.00641212	0.00983453	0.010219	0.0141308	0.0068822	0.00651883
425	0.0121498	0.0195438	0.00447224	0.00922926	0.00625432	0.00975751	0.0102003	0.0143615	0.00680556	0.00663614
424	0.0122486	0.0195077	0.00463281	0.00924609	0.00649272	0.0098881	0.0106584	0.0145982	0.0072165	0.00713461
423	0.0120351	0.0194166	0.00452685	0.00903634	0.00633724	0.0096307	0.0105919	0.0145065	0.0072187	0.00716023
422	0.0120265	0.019424	0.00439928	0.00892109	0.00643473	0.00964874	0.0107955	0.0145782	0.00722339	0.00738425
421	0.0121251	0.0195894	0.00424739	0.00869895	0.00636912	0.00957218	0.0110026	0.0147512	0.00762998	0.00776524
420	0.0119902	0.0191757	0.00437004	0.00877908	0.00626357	0.00939355	0.0108085	0.0148513	0.00778149	0.00789199
419	0.0115779	0.0186415	0.00427067	0.00868428	0.00638939	0.00953159	0.0108682	0.0150644	0.00780779	0.00829939
418	0.011576	0.0184299	0.0045213	0.0086192	0.00634253	0.00918684	0.0109835	0.0150487	0.00802365	0.00837815
417	0.0117368	0.0181142	0.00450263	0.00854165	0.00619022	0.00911404	0.0109391	0.0149453	0.00807806	0.0084536
416	0.0118347	0.0179248	0.00463051	0.00831603	0.00627444	0.00888667	0.0108329	0.0149263	0.0081901	0.0085228
415	0.0116661	0.0178611	0.00495137	0.00844961	0.00614607	0.00891157	0.0109905	0.0151298	0.00845245	0.00879927
414	0.0115843	0.017788	0.00478401	0.00846751	0.00626801	0.00895052	0.011193	0.0154149	0.0086519	0.00913462
413	0.0115604	0.0173648	0.00476639	0.00831715	0.00633164	0.00870791	0.0113087	0.0154994	0.00872641	0.00929594
412	0.0118743	0.0174064	0.00490138	0.00839463	0.00616699	0.00866738	0.0112837	0.0154753	0.00874739	0.00949537
411	0.0118479	0.0174936	0.00463041	0.00842135	0.00610685	0.00867373	0.0112538	0.0155725	0.0087761	0.00958801
410	0.0117235	0.0166287	0.00451495	0.00807211	0.00583525	0.00847097	0.0112807	0.0155354	0.00862791	0.00973172
409	0.0113096	0.0164572	0.0045665	0.00800234	0.00605121	0.00850408	0.011329	0.0157529	0.00891317	0.01002
408	0.0113153	0.0165054	0.00450853	0.00776374	0.0062469	0.00838321	0.0114214	0.0159137	0.00920744	0.0101345
407	0.0114547	0.0163424	0.00449941	0.00769615	0.0060086	0.00815039	0.0114983	0.0160105	0.00937394	0.0102044
406	0.011509	0.0160454	0.00462348	0.00764319	0.00600138	0.00813489	0.0116703	0.0160608	0.00922327	0.0105639
405	0.0112767	0.0160096	0.00456128	0.00780393	0.00588272	0.00802487	0.0116124	0.0159114	0.0091601	0.0107937
404	0.0111005	0.0156846	0.00453538	0.00769979	0.00578116	0.00773644	0.0116058	0.0159002	0.00917439	0.0109749
403	0.0114762	0.0156749	0.00432456	0.00742732	0.00575815	0.0078368	0.0114931	0.0160828	0.00941477	0.0111698
402	0.0116979	0.0157361	0.00500502	0.00752483	0.00605846	0.00809108	0.0116596	0.0162958	0.0096145	0.0114494
401	0.0114682	0.0156448	0.00494949	0.00726792	0.00609702	0.00813556	0.0119989	0.016749	0.00979074	0.0117115
400	0.0113642	0.0154206	0.00492021	0.00744059	0.00599522	0.00777477	0.011884	0.0166002	0.00988279	0.0118513
399	0.0115357	0.0153839	0.00506707	0.00757906	0.00602737	0.00763802	0.0121283	0.0167042	0.010152	0.0121481
398	0.0116392	0.0154753	0.00512382	0.00750796	0.0058808	0.0077171	0.0123018	0.0169041	0.0100573	0.0124588
397	0.0115948	0.0151982	0.00517195	0.0077201	0.00596546	0.00751967	0.0122049	0.0170579	0.0102167	0.0125506
396	0.0115046	0.0149886	0.00469284	0.00776434	0.00586675	0.00745033	0.0122462	0.016997	0.0104288	0.0124637
395	0.0118313	0.0152474	0.00472574	0.00747135	0.00572732	0.00746601	0.0123818	0.0168996	0.0104564	0.0125967
394	0.0118712	0.0153562	0.00523968	0.00761105	0.00599128	0.00762842	0.0127085	0.0171185	0.0105836	0.0128755
393	0.0116	0.0150587	0.00524958	0.00779095	0.00586702	0.00746023	0.0127207	0.0174061	0.0104864	0.0130946
392	0.0116175	0.0147527	0.00505254	0.00761955	0.00593107	0.00761821	0.0126409	0.017439	0.0106961	0.0132273
391	0.0117675	0.0148827	0.00507547	0.00736761	0.00594081	0.0073313	0.0124958	0.0171234	0.0106893	0.0130881
390	0.0117192	0.0147742	0.00501275	0.00736021	0.00594747	0.00737165	0.0125492	0.0173697	0.0108516	0.013264
389	0.011798	0.0147289	0.00512772	0.00734595	0.00613638	0.00751523	0.0128375	0.0178978	0.0111387	0.013651
388	0.0118627	0.01474	0.00538532	0.0073314	0.00602559	0.00731695	0.0128529	0.0177603	0.011074	0.013808
387	0.0120519	0.0147088	0.00529812	0.00742053	0.00615563	0.00717109	0.0129758	0.0178475	0.0111048	0.0140801
386	0.0121253	0.0147619	0.00538433	0.00748244	0.00627915	0.0072603	0.0132127	0.0180237	0.0114217	0.01425
385	0.0121617	0.0146419	0.00531913	0.00749767	0.00619885	0.00740208	0.0132558	0.0180599	0.0113178	0.0140931
384	0.012283	0.0144715	0.00508458	0.00719108	0.00596629	0.00735197	0.013112	0.0182028	0.0112982	0.0141376
383	0.0122821	0.0145829	0.00542252	0.0071168	0.00611106	0.00726031	0.0130593	0.0182006	0.0114681	0.0142281
382	0.0125451	0.0147077	0.00586846	0.00747922	0.00632176	0.00738391	0.0135153	0.0184041	0.011752	0.0142919
381	0.0126987	0.0147643	0.00587955	0.00759442	0.00629564	0.00741614	0.0136262	0.0185107	0.0118498	0.0145385
380	0.0127305	0.0147922	0.00585437	0.00758009	0.00605473	0.00718283	0.0134661	0.0183961	0.0117608	0.0144105
379	0.0129336	0.0147794	0.00577486	0.00763907	0.00611522	0.00723168	0.0136209	0.0186208	0.0117784	0.0143554
378	0.0127115	0.0147316	0.00588662	0.00792983	0.00640937	0.00734944	0.0137396	0.0189766	0.0120656	0.0144968
377	0.0128456	0.0148996	0.00580364	0.00766683	0.00643604	0.00720604	0.0138596	0.0187538	0.0119456	0.0146191
376	0.0134235	0.0150751	0.00589848	0.00761472	0.00648114	0.0071194	0.0137187	0.0186894	0.0118536	0.0145715
375	0.0133682	0.0150023	0.00606144	0.00768116	0.0065553	0.00727062	0.0139514	0.0188308	0.0119934	0.0148113
374	0.0134257	0.0150848	0.00609064	0.00784304	0.0065089	0.00751315	0.0140334	0.0190289	0.0119455	0.0149507
373	0.013463	0.0150223	0.00627806	0.00809384	0.00658649	0.00750521	0.0140403	0.0190372	0.0120402	0.0149676
372	0.0135725	0.0150377	0.00627834	0.00780734	0.00692599	0.00752424	0.0140821	0.0192186	0.0121774	0.0150545
371	0.0136523	0.0152562	0.00627174	0.00788788	0.00669673	0.00755616	0.0142444	0.0190578	0.0121583	0.0149333
370	0.0136561	0.0135935	0.00650699	0.00803993	0.00662173	0.00728022	0.0146082	0.0190497	0.0120296	0.0146234
369	0.0136652	0.0137543	0.0067246	0.0079512	0.00662664	0.00738811	0.0148636	0.0189963	0.012141	0.0146129
368	0.0136856	0.0136726	0.00685933	0.00810386	0.00692392	0.00756972	0.0149802	0.0192232	0.0122399	0.0149703
367	0.0135936	0.0136722	0.00707818	0.00844737	0.00681793	0.00742992	0.0148824	0.0191197	0.0119775	0.0147591
366	0.0136357	0.0137166	0.0070138	0.0084465	0.00700555	0.00737498	0.0148874	0.0190366	0.0121187	0.014572
365	0.0139066	0.0141638	0.00681874	0.00836915	0.00721367	0.00750325	0.0150114	0.0191719	0.0123038	0.0144779
364	0.0140386	0.0141899	0.00663362	0.00814004	0.00709638	0.00766616	0.0151373	0.019315	0.0122157	0.0145691
363	0.0139938	0.0141215	0.00667077	0.00803021	0.0071908	0.00762791	0.0151359	0.0192251	0.0121625	0.0145609
362	0.0141855	0.0141894	0.00676388	0.00792865	0.00722056	0.00747599	0.015087	0.0191201	0.0121871	0.0144493
361	0.0143961	0.0143271	0.0070002	0.00820529	0.00724165	0.00760575	0.0152964	0.0190265	0.0121718	0.0143977
360	0.0145463	0.0144324	0.00721353	0.00842066	0.00709793	0.00774022	0.015331	0.0189478	0.0122956	0.0143108
359	0.0146282	0.0144461	0.00739239	0.00838213	0.00736533	0.00776018	0.0155378	0.0191838	0.0126738	0.0142655
358	0.0145976	0.0146916	0.00753775	0.00835978	0.0071715	0.00757673	0.0155897	0.0190724	0.0125883	0.0142183
357	0.0148035	0.0147198	0.00770366	0.00854678	0.00734359	0.00756311	0.0155696	0.0189021	0.0125881	0.0140816
356	0.0151165	0.0147342	0.00789213	0.00895849	0.0077417	0.00773644	0.0157951	0.0189068	0.0124985	0.0139528
355	0.0151893	0.0147898	0.00789725	0.00881972	0.0075393	0.00766754	0.0156337	0.0188626	0.0122695	0.0139113
354	0.0153198	0.014922	0.00797815	0.00869705	0.0075666	0.00783908	0.015967	0.0189404	0.0125412	0.0137714
353	0.0151856	0.0149225	0.00781497	0.00875314	0.00782949	0.0079291	0.016261	0.0189848	0.0125712	0.0138352
352	0.0152001	0.0148304	0.00774282	0.00858022	0.00750134	0.00755107	0.015754	0.0184849	0.0121759	0.0135388
351	0.0152772	0.0149111	0.00776433	0.00860613	0.00779842	0.00776685	0.0159539	0.0186364	0.0122965	0.0136348
350	0.0154433	0.0151626	0.00794596	0.00882208	0.00762497	0.00793081	0.0162386	0.0185966	0.0122238	0.0136135
349	0.0154673	0.0152243	0.00802185	0.00883042	0.00763677	0.0077057	0.0161873	0.0184436	0.012166	0.0133754
348	0.0157006	0.0155017	0.00797677	0.00858327	0.00790918	0.00779107	0.0162767	0.0186276	0.0121694	0.0133689
347	0.0157596	0.0155731	0.00811308	0.00884677	0.00793252	0.00810381	0.0163501	0.0188199	0.0123704	0.0135043
346	0.0155831	0.0155383	0.00825292	0.00898619	0.00773297	0.00800808	0.0163735	0.0186513	0.0123198	0.0131483
345	0.015375	0.0155305	0.00832255	0.00910993	0.00769456	0.00790635	0.0163734	0.0184533	0.0121201	0.012967
344	0.0155994	0.0157991	0.008314	0.00925072	0.00763063	0.00793683	0.016206	0.0184936	0.0120922	0.0128931
343	0.0160627	0.0161916	0.0082057	0.00905072	0.00788348	0.00807063	0.0162947	0.0183664	0.0119274	0.012833
342	0.0159552	0.0158928	0.00839264	0.0090723	0.00797449	0.00802305	0.0163422	0.0185029	0.0120172	0.012671
341	0.0157421	0.0156662	0.00874133	0.00953044	0.00812093	0.00805338	0.0165964	0.0187005	0.0121761	0.0125214
340	0.0161825	0.0148	0.0087521	0.00972975	0.00802257	0.00821733	0.0167797	0.0186943	0.0121256	0.0127512
339	0.0161402	0.0148186	0.0088013	0.00991285	0.0080804	0.00836376	0.016856	0.0188041	0.0121034	0.0125263
338	0.0162092	0.0148364	0.00885032	0.00973781	0.00830622	0.00848095	0.0169152	0.0187625	0.012244	0.0125441
337	0.0161209	0.0148731	0.00901382	0.00970526	0.00816599	0.00843781	0.0169021	0.0187919	0.0122506	0.0124005
336	0.0162724	0.0150788	0.00956812	0.0101556	0.00819909	0.00844567	0.0169238	0.0186538	0.0119566	0.0121414
335	0.0163539	0.0150859	0.00951223	0.00999446	0.00785758	0.00810767	0.0166302	0.0182115	0.01159	0.0115905
334	0.0161568	0.0150369	0.00955165	0.0100561	0.00775447	0.00807775	0.0164896	0.0181493	0.0114582	0.011372
333	0.0160422	0.0150022	0.0098473	0.0100977	0.00799673	0.00835066	0.0167142	0.0184032	0.011752	0.0116083
332	0.0162072	0.0150069	0.00990428	0.0104447	0.00822372	0.00842591	0.0169342	0.0184076	0.0117922	0.0116049
331	0.0160733	0.01503	0.0099695	0.0109035	0.00828705	0.00842767	0.0170998	0.0184933	0.0118053	0.0116032
330	0.016313	0.0149862	0.0103928	0.0112513	0.00801625	0.00832005	0.0171414	0.0182238	0.0116616	0.0114975
329	0.0163195	0.0152033	0.0105348	0.0114611	0.00812061	0.00832967	0.0170933	0.0182118	0.0117806	0.0112548
328	0.0162917	0.0151824	0.0106738	0.0114297	0.00836613	0.00845175	0.0172432	0.0183925	0.0116465	0.0112433
327	0.0161275	0.0148495	0.0109603	0.0116087	0.00791132	0.00843821	0.016961	0.0179461	0.0113182	0.0108987
326	0.0159761	0.014851	0.0111109	0.0120219	0.00780864	0.00825362	0.0168163	0.017702	0.0112626	0.010553
325	0.0158977	0.0146119	0.0117323	0.012474	0.00788288	0.00801392	0.0167846	0.0177373	0.0110421	0.0102433
324	0.0158837	0.0144525	0.0122735	0.0129115	0.0078402	0.00791758	0.0169094	0.0177852	0.0106859	0.0098326
323	0.0157004	0.0145103	0.0126553	0.013029	0.0075947	0.00800509	0.0169497	0.0178268	0.0105173	0.00958983
322	0.0159038	0.0146836	0.0127471	0.0132976	0.00742603	0.00780083	0.0167572	0.0174311	0.0101957	0.00943688
321	0.0158274	0.0146303	0.0130263	0.0134152	0.0075514	0.00750266	0.0167995	0.0172367	0.00989863	0.00936672
320	0.0157669	0.0143366	0.0137077	0.0141182	0.00763083	0.00757308	0.0169821	0.0172386	0.0097539	0.00908983
319	0.0157478	0.0142253	0.0142349	0.0146665	0.0074601	0.00765236	0.0171034	0.0173943	0.00963851	0.00877266
318	0.0153525	0.0141465	0.0145576	0.0152763	0.00752922	0.00776363	0.0171869	0.0174886	0.00964772	0.0088412
317	0.0155631	0.0142577	0.01485	0.0154305	0.00773075	0.0077623	0.0171334	0.0176002	0.0096515	0.00884948
316	0.0156767	0.014341	0.015381	0.0156509	0.00771925	0.00774361	0.0172591	0.0175527	0.0094368	0.00878184
315	0.0155717	0.0144204	0.0160609	0.0163053	0.00768151	0.00773821	0.0171336	0.0176348	0.00950152	0.00874276
314	0.0156864	0.0143868	0.0162685	0.0169075	0.00780264	0.00777761	0.0174382	0.0179935	0.00943613	0.00871243
313	0.015754	0.0145478	0.0167666	0.0175807	0.00785404	0.00805391	0.0177049	0.018074	0.00945575	0.00879554
312	0.0158963	0.014793	0.0176334	0.0183241	0.00760905	0.00799446	0.0176195	0.017975	0.00939976	0.00880022
311	0.0162365	0.015037	0.0183579	0.0189918	0.00752724	0.008103	0.0180665	0.0183455	0.0094428	0.00861005
310	0.0166435	0.0152918	0.019194	0.0197251	0.00780628	0.00832908	0.018663	0.0190696	0.00956179	0.00877693
309	0.0172544	0.0160826	0.0200493	0.0206957	0.00820198	0.00843546	0.0193134	0.019736	0.0100839	0.00890101
308	0.0176897	0.0165679	0.021176	0.0215124	0.0084574	0.00856629	0.0200381	0.0203137	0.0105868	0.00929259
307	0.0186154	0.017669	0.0220182	0.0221172	0.00871716	0.008805	0.0210865	0.0214787	0.0111875	0.0100047
306	0.0199928	0.0186407	0.0232052	0.0233169	0.00916101	0.009291	0.0226468	0.0229298	0.012249	0.0110623
305	0.0216059	0.0200921	0.0244893	0.0248988	0.00989047	0.010049	0.0245479	0.0249594	0.0133676	0.0122178
304	0.0233155	0.0221352	0.026136	0.0266489	0.0108503	0.0110462	0.0272662	0.0274765	0.0147642	0.0137567
303	0.0258338	0.0248792	0.0284686	0.0285985	0.01231	0.012403	0.03062	0.0309015	0.0167887	0.0160236
302	0.0290008	0.0280239	0.0309771	0.0310328	0.0136079	0.013796	0.0344376	0.0346489	0.0193329	0.0184036
301	0.0322618	0.0311542	0.033493	0.0337646	0.01517	0.015473	0.039131	0.0393052	0.0223217	0.0213576
300	0.036452	0.0353741	0.0369017	0.036927	0.0173595	0.0175512	0.0448636	0.0448026	0.0263039	0.0249687
299	0.0414741	0.0402998	0.0406485	0.0406058	0.0197697	0.0197674	0.0513157	0.0512188	0.0306702	0.0290404
298	0.047395	0.0458763	0.044975	0.0447381	0.0223467	0.0222984	0.0589356	0.0586613	0.0354569	0.0337882
297	0.0542217	0.0525343	0.0497202	0.0496026	0.0255258	0.0254713	0.0679275	0.0675663	0.0413219	0.0396778
296	0.0622137	0.0604899	0.0553226	0.0553481	0.0292942	0.0293175	0.0787424	0.0783517	0.048671	0.0468312
295	0.0720912	0.0705194	0.0622968	0.0620788	0.0341686	0.0339915	0.0915006	0.0911021	0.0572803	0.0552301
294	0.0830591	0.0816948	0.0696132	0.0694088	0.03934	0.0393066	0.105875	0.105542	0.0667075	0.0649554
293	0.094491	0.0931635	0.0771013	0.0769346	0.0449158	0.0449223	0.120622	0.120659	0.0766944	0.0748456
292	0.105127	0.10388	0.0839364	0.0838627	0.0496936	0.0496538	0.134361	0.134128	0.085665	0.0838999
291	0.113723	0.112265	0.0902346	0.0896553	0.0533369	0.0532043	0.145555	0.144898	0.0929181	0.0910034
290	0.121967	0.119754	0.0961358	0.0950083	0.0568511	0.0562827	0.155561	0.154787	0.0996598	0.0976322
289	0.130678	0.127941	0.101935	0.100958	0.0607345	0.0602482	0.167066	0.165956	0.107342	0.105026
288	0.140613	0.137608	0.108495	0.107452	0.0652016	0.0646387	0.180114	0.178646	0.115896	0.113658
287	0.150823	0.147663	0.115568	0.114181	0.0697494	0.0690794	0.193675	0.192305	0.124952	0.122644
286	0.160391	0.157392	0.122173	0.120549	0.0736866	0.0731645	0.206236	0.204871	0.133115	0.130999
285	0.168301	0.165445	0.127544	0.125976	0.0766134	0.0760391	0.216391	0.215036	0.140048	0.137932
284	0.174626	0.171647	0.132061	0.13057	0.0789741	0.0784525	0.224333	0.223371	0.145836	0.143498
283	0.179703	0.176651	0.135299	0.134295	0.0810312	0.080415	0.231224	0.230158	0.150702	0.148284
282	0.184521	0.18115	0.138479	0.137427	0.0820676	0.0814975	0.237094	0.23585	0.154423	0.15233
281	0.188174	0.184776	0.141258	0.139708	0.0829022	0.0822489	0.241984	0.240685	0.157795	0.155585
280	0.191185	0.187715	0.143249	0.141606	0.0837579	0.0831207	0.246361	0.245132	0.16104	0.158994
279	0.193262	0.189913	0.144616	0.142882	0.0838409	0.0832559	0.249481	0.24846	0.163377	0.161442
278	0.194695	0.191539	0.145728	0.144119	0.0834499	0.0829737	0.251929	0.25097	0.165201	0.163115
277	0.196209	0.19304	0.146833	0.145332	0.0830853	0.0827523	0.254142	0.252932	0.166786	0.164693
276	0.196896	0.193911	0.147482	0.146115	0.0826242	0.0822396	0.255899	0.254712	0.168069	0.166082
275	0.197549	0.194419	0.147598	0.146433	0.08163	0.0811344	0.256586	0.255381	0.168592	0.166649
274	0.197308	0.194097	0.147312	0.146295	0.0801922	0.0798715	0.25647	0.25526	0.168769	0.166695
273	0.196545	0.193461	0.146975	0.145852	0.078798	0.0786455	0.256005	0.254942	0.168684	0.166687
272	0.195402	0.192452	0.146616	0.145236	0.0773256	0.0771762	0.255343	0.254498	0.168496	0.16665
271	0.194462	0.191651	0.145922	0.144622	0.0759458	0.0759206	0.254752	0.253988	0.168176	0.166237
270	0.19318	0.190465	0.145074	0.143907	0.0744894	0.0745527	0.253985	0.253279	0.168009	0.166016
269	0.191427	0.188923	0.143819	0.143058	0.0727813	0.072947	0.25241	0.251561	0.167138	0.16525
268	0.189517	0.187245	0.142381	0.141778	0.0706853	0.070842	0.250003	0.249167	0.165762	0.163716
267	0.187692	0.185344	0.141326	0.140654	0.0692524	0.0692863	0.24856	0.247828	0.165041	0.163221
266	0.186001	0.183651	0.140371	0.139592	0.0678054	0.0677735	0.24682	0.246125	0.164139	0.162617
265	0.183889	0.181583	0.138996	0.138126	0.0656714	0.0660792	0.244389	0.243668	0.162897	0.161173
264	0.181168	0.178831	0.137439	0.136657	0.0634413	0.0638259	0.241115	0.240565	0.161156	0.159192
263	0.178475	0.176277	0.135916	0.135167	0.0615741	0.0618909	0.238229	0.237806	0.159694	0.157789
262	0.175939	0.174123	0.134764	0.134243	0.0601049	0.0606211	0.2356	0.235604	0.158449	0.15661
261	0.173835	0.172173	0.133825	0.133473	0.0585311	0.0592304	0.232969	0.233163	0.157162	0.155712
260	0.171644	0.17001	0.133298	0.132962	0.0573883	0.058064	0.230339	0.230319	0.155916	0.15474
259	0.168445	0.16662	0.132507	0.132055	0.0558927	0.0562746	0.226497	0.226415	0.154318	0.15287
258	0.164933	0.162901	0.131458	0.130956	0.0537364	0.0541624	0.221617	0.221762	0.152036	0.150552
257	0.161173	0.159688	0.130629	0.130252	0.0519047	0.052126	0.217048	0.21732	0.150287	0.148609
256	0.158098	0.15701	0.130736	0.130496	0.0503121	0.0506425	0.213534	0.21376	0.149077	0.147571
255	0.155987	0.154875	0.13203	0.131641	0.0488744	0.0495528	0.210596	0.210678	0.148591	0.14705
254	0.153776	0.152446	0.134026	0.133588	0.0476826	0.0483085	0.20769	0.207888	0.148511	0.14681
253	0.151119	0.149961	0.13644	0.13632	0.0460559	0.0465777	0.20454	0.20481	0.148214	0.146613
252	0.148072	0.147262	0.14001	0.139837	0.0436353	0.0443881	0.20077	0.201341	0.147959	0.146361
251	0.145191	0.144408	0.145384	0.145354	0.0411047	0.0419952	0.197382	0.197923	0.148202	0.146583
250	0.143033	0.142237	0.153001	0.153032	0.0383807	0.0392649	0.194996	0.195371	0.149404	0.14751
