# Supplementary material for: Coral anthozoan-specific opsins employ a novel chloride counterion for spectral tuning
Source: eLife. 2025 Sep 1;14:RP105451. doi: 10.7554/eLife.105451 (PMC12401545; doi:10.7554/eLife.105451)
Supplement: Figure 2—figure supplement 3—source data 1. [file elife-105451-fig2-figsupp3-data1.xlsx]

## Sheet: Sheet1
wavelength [nm]	A_left_curve1_Antho2A_left_WT_0_28NaCl_pH6_5_dark	A_left_curve2_Antho2A_left_WT_0_28NaCl_pH6_5_UV_01	A_left_curve3_Antho2A_left_WT_0_28NaCl_pH6_5_UV_02	A_right_curve1_Antho2a_WT_0_28NaCl_pH7_3_dark	A_right_curve2_Antho2a_WT_0_28NaCl_pH7_3_UV_01	A_right_curve3_Antho2a_WT_0_28NaCl_pH7_3_UV_02	B_left_curve1_Antho2a_WT_2_8NaCl_pH6_5_dark	B_left_curve2_Antho2a_WT_2_8NaCl_pH6_5_O55_01	B_left_curve3_Antho2a_WT_2_8NaCl_pH6_5_O55_02	B_middle_curve1_Antho2a_WT_8NaCl_pH6_5_dark	B_middle_curve2_Antho2a_WT_8NaCl_pH6_5_O56_01	B_middle_curve3_Antho2a_WT_8NaCl_pH6_5_O56_02	B_right_curve3_Antho2a_WT_800NaCl_pH6_6_dark	B_right_curve2_Antho2a_WT_800NaCl_pH6_6_O56_01	B_right_curve1_Antho2a_WT_800NaCl_pH6_6_056_02	C_left_curve1_Antho2a_E292A_800NaCl_pH4_8_dark	C_left_curve2_Antho2a_E292A_800NaCl_pH4_8_O56_01	C_left_curve3_Antho2a_E292A_800NaCl_pH4_8_O56_02	C_middle_curve1_Antho2a_E292A_800NaCl_pH6_5_dark	C_middle_curve2_Antho2a_E292A_800NaCl_pH6_5_O56_01	C_middle_curve3_Antho2a_E292A_800NaCl_pH6_5_O56_02	C_right_curve1_Antho2a_E292A_800NaCl_pH7_6_dark	C_right_curve2_Antho2a_E292A_800NaCl_pH7_6_O56_01	C_right_curve3_Antho2a_E292A_800NaCl_pH7_6_O56_02
750	-0.000364706	-0.000317265	-7.02968e-05	0.000178136	-0.000403141	-0.000660683	0.00479678	0.00252707	0.00309863	0.00252051	0.00128225	0.0017238	0.00686383	0.00712117	0.0066605	0.00280175	0.0008434	0.00041611	0.00503573	0.00271594	0.00310647	0.00404491	0.00118121	0.00117004
749	-0.00041442	-0.000257869	-0.000117873	0.00035577	-0.00051338	-0.000668463	0.00469884	0.00273198	0.00322419	0.00277253	0.00119948	0.00177336	0.00678105	0.00731489	0.00682678	0.00265882	0.00040625	0.00072473	0.00489495	0.00298027	0.00342058	0.00383724	0.00131752	0.00113131
748	-0.000413708	-0.000148046	-6.22783e-05	0.000325715	-0.000774248	-0.000696261	0.00453936	0.00256563	0.00315591	0.00283866	0.00119554	0.0017914	0.00677487	0.00716353	0.00686786	0.00282885	0.000298837	0.000542067	0.00522305	0.00302319	0.00342715	0.00385704	0.00145243	0.00112325
747	-0.000376961	2.35489e-05	-0.000125119	0.00015117	-0.000817607	-0.000984035	0.00448226	0.00268274	0.00336205	0.00249234	0.00104913	0.0014181	0.00653416	0.00717922	0.00675596	0.0030408	0.000524253	0.000826573	0.00498247	0.00320495	0.00341266	0.00412333	0.00146772	0.00109435
746	-0.000438614	-0.000209699	-0.000354566	0.000312153	-0.000640072	-0.000863342	0.00455974	0.00277272	0.00306436	0.0022445	0.000774603	0.0012117	0.00631304	0.00715552	0.00631602	0.0029205	0.000628843	0.000990213	0.00482145	0.00325169	0.00324914	0.00395265	0.00122487	0.00111914
745	-0.000489992	-0.000467597	-0.000441819	0.000270437	-0.000449589	-0.000784701	0.00453708	0.00253912	0.00277938	0.0023736	0.000880586	0.00129868	0.00629544	0.00693839	0.00612752	0.00290338	0.00084368	0.00101557	0.00475853	0.00277128	0.00300168	0.00369443	0.00123544	0.00138208
744	-0.000510919	-0.000457084	-0.000229597	0.000236898	-0.000454697	-0.000872251	0.00455651	0.00238786	0.00318192	0.00244141	0.00151478	0.00160013	0.00657584	0.00718015	0.00613835	0.00289756	0.000997593	0.000809073	0.00490229	0.00249669	0.00325637	0.00395029	0.00110385	0.00132059
743	-0.000493556	-0.0005558	-0.000389372	0.000292612	-0.000394707	-0.000816478	0.00453423	0.00230175	0.00317279	0.00249859	0.00150028	0.00138933	0.0067278	0.00728819	0.00624941	0.00302617	0.000914483	0.000719663	0.00497554	0.00260107	0.00325306	0.00398153	0.00151964	0.0014615
742	-0.000498347	-0.000594942	-0.000490999	0.000255885	-0.000630272	-0.000676244	0.00465453	0.00244217	0.00322655	0.00279183	0.00152056	0.00143413	0.00677521	0.00738354	0.00674901	0.00313993	0.00110679	0.00115359	0.00495967	0.00248629	0.00310859	0.00395853	0.00160108	0.00143964
741	-0.000442752	-0.000427267	-0.00039454	0.000280178	-0.000799135	-0.000835366	0.00451788	0.00239444	0.00290798	0.00268109	0.00152994	0.00151539	0.00666087	0.00733495	0.0068545	0.00317634	0.000951047	0.00136973	0.00523788	0.00269407	0.00342078	0.00415333	0.00150254	0.00105054
740	-0.000520422	-0.000254959	-0.000430652	0.000239987	-0.000636033	-0.000669592	0.00447753	0.00265894	0.00305796	0.0025119	0.000755161	0.00149523	0.00651754	0.0073654	0.00641115	0.00250341	0.000664527	0.000759616	0.00452127	0.00271715	0.00313613	0.00358742	0.0012965	0.00115258
739	-0.000499139	-0.000541248	-0.000555503	0.00012365	-0.000392153	-0.000496156	0.00456993	0.00239184	0.00297071	0.00255615	0.000677649	0.00183836	0.00679536	0.00728789	0.00638893	0.00253053	0.000431487	0.000897517	0.00464958	0.00262362	0.00305121	0.00353615	0.00135688	0.00104974
738	-0.000583362	-0.000406241	-0.000454767	0.000189085	-0.000347487	-0.00043771	0.00447919	0.0023893	0.0029715	0.0023383	0.000596317	0.00164674	0.00669696	0.0071341	0.00643637	0.00279235	0.000594633	0.000987243	0.00498351	0.00258526	0.00286412	0.00384122	0.0013192	0.00122482
737	-0.000386286	-0.000177982	-0.000144542	0.000285484	-0.000443174	-0.00058424	0.00445676	0.002784	0.00319709	0.00248949	0.000584002	0.00152115	0.00675697	0.00713027	0.00643766	0.00290403	0.000509833	0.000710413	0.00489032	0.0028259	0.00313375	0.00389703	0.00141208	0.00121251
736	-0.000564593	-0.00052634	-0.000317681	0.000234582	-0.000639597	-0.000723345	0.00445943	0.00282915	0.00335486	0.0025001	0.00117288	0.00174397	0.00691904	0.00741872	0.00652006	0.00280032	0.000747423	0.000809723	0.0049393	0.00277542	0.00334289	0.00377802	0.00157534	0.0012132
735	-0.000656895	-0.000452688	-0.000146264	0.000127887	-0.00058127	-0.000781197	0.00442247	0.00247175	0.00326272	0.00256478	0.00130249	0.00201542	0.0070509	0.00732186	0.00664909	0.0027475	0.000799733	0.000852953	0.00473943	0.00289794	0.00318886	0.00384332	0.00131119	0.00086578
734	-0.000464135	-0.000347498	0.000206489	0.000201221	-0.000717168	-0.000839227	0.00434181	0.00219625	0.00297327	0.00236806	0.00108709	0.00143967	0.00680348	0.00701832	0.00627545	0.00247479	0.00054379	0.0009222	0.00445407	0.00277952	0.00284741	0.00369805	0.00130234	0.00112778
733	-0.000482904	-0.00030212	0.000142579	0.000146795	-0.000735878	-0.000702735	0.00428449	0.00248777	0.00308802	0.00231834	0.000951664	0.00129568	0.00683108	0.00702051	0.00649028	0.00248865	0.00048758	0.0009441	0.00448085	0.00249618	0.00276905	0.00357388	0.00105128	0.0010846
732	-0.000432299	-0.000367633	-0.000124407	0.000186709	-0.000656941	-0.000672562	0.00419613	0.00224931	0.00323647	0.00224042	0.000754924	0.00149072	0.00677509	0.00695824	0.00657894	0.0026925	0.000433923	0.000802543	0.00460983	0.00278045	0.00299695	0.00351991	0.00081433	0.0007019
731	-0.000482924	-0.000431009	-0.000307346	0.000291761	-0.000620947	-0.000743896	0.00430665	0.00232444	0.00310942	0.00228859	0.00103125	0.00161209	0.00651121	0.00712968	0.00637155	0.00262289	0.000497547	0.000622567	0.00481326	0.00276383	0.00316297	0.00371942	0.000792227	0.0010626
730	-0.000391355	-0.000443898	-0.000263631	0.000163802	-0.000613403	-0.000624748	0.00432924	0.00254512	0.0030526	0.00238394	0.00105558	0.00148935	0.00650658	0.00683209	0.00643805	0.00275255	0.000557923	0.000654323	0.00487404	0.00257467	0.00310348	0.0038196	0.00105822	0.0008555
729	-0.000545151	-0.000295527	-0.000381829	0.000193618	-0.000483267	-0.000667454	0.00458013	0.00240888	0.00323787	0.00232472	0.000946414	0.00169754	0.00646165	0.00691619	0.00648402	0.0027575	0.0005016	0.0005964	0.00482216	0.00243548	0.00291261	0.00369326	0.00122194	0.0008867
728	-0.000572295	-0.000228825	-0.000483277	0.000307718	-0.000610849	-0.000667216	0.00463606	0.00255993	0.00338673	0.00236782	0.000978075	0.00148781	0.00656738	0.00715169	0.00621609	0.00281628	0.000636957	0.000465487	0.0048442	0.00247878	0.00302558	0.0036913	0.00111484	0.00110949
727	-0.000485933	-9.58371e-05	-0.000171626	0.000332011	-0.000410566	-0.000786483	0.00454712	0.00257047	0.00323255	0.00237792	0.000984152	0.00126961	0.00644503	0.00703429	0.00613961	0.00267286	0.000536057	0.000530826	0.00470755	0.0027516	0.00306449	0.00350537	0.00124795	0.00115155
726	-0.000459086	-0.000355873	-0.000172814	0.000299997	-0.000458201	-0.000676957	0.004548	0.00257694	0.00314815	0.002388	0.00113207	0.00146748	0.00640159	0.00711783	0.006306	0.00281381	0.000439077	0.000799487	0.00479965	0.00259796	0.00302068	0.0037095	0.0013254	0.00135664
725	-0.000393394	-0.000311563	-0.000171745	0.000207893	-0.000381878	-0.00063437	0.00440166	0.00218733	0.0033964	0.00253861	0.00129539	0.00178071	0.0065828	0.00721789	0.00648256	0.00274873	0.000473383	0.000705033	0.00484012	0.00272899	0.00299616	0.00377986	0.00135242	0.00130764
724	-0.000409728	-3.08578e-05	-0.000111518	0.000190728	-0.000399637	-0.000814043	0.00449562	0.00231848	0.00334122	0.00257391	0.00131784	0.00180103	0.0066003	0.00741051	0.00628263	0.00262143	0.000640287	0.000642727	0.00480781	0.00283372	0.0034515	0.00384211	0.00103034	0.00113625
723	-0.00056689	-0.00024504	-0.000204948	0.000249926	-0.000517716	-0.000613225	0.0045119	0.0025665	0.00340357	0.0024428	0.00122576	0.00177143	0.00650252	0.00731237	0.00618141	0.00270339	0.000471817	0.000601837	0.00485359	0.00269705	0.00341414	0.00398316	0.000944697	0.0010863
722	-0.000457403	-0.000339361	-0.000227993	0.000281228	-0.000548899	-0.000458498	0.00459008	0.00274831	0.00345631	0.002276	0.00101443	0.0016932	0.00645292	0.00707965	0.00617653	0.00270207	0.000781967	0.000707847	0.00479019	0.00254663	0.00295581	0.00372898	0.001123	0.00120842
721	-0.000490922	-0.000137889	-3.90545e-05	0.000210348	-0.000553829	-0.000527635	0.00451368	0.0026652	0.00308364	0.00227434	0.000868509	0.00157865	0.00664103	0.00723291	0.00625834	0.00284111	0.00066308	0.0005431	0.00479847	0.00251291	0.00274883	0.00369073	0.000994803	0.00127277
720	-0.000548556	-0.000120546	4.33278e-05	0.000153249	-0.000381521	-0.000579845	0.00441924	0.00256464	0.00318735	0.0024252	0.000958319	0.00163674	0.0066063	0.00724479	0.00652871	0.00275235	0.00063225	0.00052545	0.00485888	0.00270013	0.00296189	0.00369006	0.000972397	0.000993417
719	-0.000447167	-0.000168003	0.000112287	0.000224445	-0.00044757	-0.000439967	0.00453443	0.00238833	0.0031767	0.00245682	0.000933986	0.00136396	0.00663157	0.00720573	0.0065424	0.00256001	0.000511927	0.000694457	0.00487944	0.0026495	0.00295271	0.00368988	0.00123663	0.00105137
718	-0.000477677	-0.000244862	0.000118345	0.000284118	-0.000495621	-0.000699943	0.00418419	0.00220225	0.0029425	0.00237362	0.0008537	0.00159241	0.00675909	0.00713548	0.00643782	0.00267627	0.000473053	0.000843093	0.00493066	0.00261772	0.00306889	0.00385381	0.00116468	0.00127652
717	-0.000522224	-0.000488682	7.90248e-05	0.000222465	-0.000536426	-0.000951189	0.00431142	0.00234235	0.0027327	0.00245276	0.00107576	0.00157023	0.00674875	0.0072141	0.00637026	0.00279203	0.00047315	0.00072695	0.00493488	0.00288061	0.00311813	0.00373508	0.00118646	0.00134338
716	-0.000449028	-0.000259295	-9.24515e-05	0.000307936	-0.000421138	-0.000636033	0.00464748	0.00251409	0.00305466	0.00222014	0.000997831	0.00154297	0.00649127	0.00737358	0.00636581	0.00256333	0.000690793	0.000922853	0.00469844	0.00272333	0.00302007	0.00363408	0.00142713	0.00132729
715	-0.000269474	-0.000410577	-0.000358665	0.000347553	-0.000349804	-0.00038657	0.00467423	0.00240724	0.00321058	0.00228318	0.000964632	0.0014139	0.00655695	0.00731502	0.00663558	0.0025553	0.00064219	0.00091689	0.00473366	0.00260034	0.00280745	0.00366438	0.00133504	0.00113363
714	-0.000348411	-0.00040636	-0.00038569	0.000191876	-0.000135503	-0.000273955	0.00458533	0.00235779	0.00317579	0.00220805	0.000979027	0.00164153	0.00669199	0.00703855	0.0066842	0.00277621	0.000505817	0.000958947	0.00489135	0.00280389	0.0028735	0.00396007	0.0014082	0.00107612
713	-0.000468887	-0.00031483	-0.000414497	0.000371232	-0.000209688	-0.000466517	0.0045377	0.00268589	0.00336835	0.00230708	0.00107999	0.00194848	0.00680898	0.00715555	0.00660549	0.00280666	0.00051029	0.00045499	0.00497828	0.00261528	0.0031546	0.00408175	0.00123263	0.00108491
712	-0.000415707	-0.000446333	-0.000527409	0.000442349	-0.00020761	-0.000230239	0.0045081	0.00256312	0.00338843	0.00254516	0.00113036	0.00188885	0.00682189	0.00728361	0.00671965	0.00266124	0.000581507	0.000216637	0.00464489	0.00263218	0.00293741	0.00377022	0.00124862	0.00105404
711	-0.000421509	-0.000236487	-0.00018303	0.000371035	-0.00049871	-0.000556561	0.0044393	0.00252368	0.00309227	0.00244427	0.000877481	0.00169964	0.00666467	0.00709191	0.00667744	0.00267702	0.00053714	0.00037956	0.00451932	0.00232779	0.00255201	0.00366741	0.00135025	0.000857443
710	-0.000430814	-0.000257751	-3.45404e-05	0.000466721	-0.000610315	-0.000767833	0.0044373	0.00241902	0.00297223	0.00260348	0.000851466	0.00178392	0.00678134	0.00720007	0.00655022	0.0026099	0.000585687	0.000370197	0.00460818	0.00229416	0.0024844	0.0036858	0.00113674	0.00088835
709	-0.000404422	-0.000369059	-1.49397e-05	0.000338743	-0.000551869	-0.0006137	0.00439375	0.00245998	0.00314274	0.00245826	0.000989098	0.00153977	0.00667486	0.00706746	0.00652547	0.00263374	0.000635087	0.000428087	0.00459557	0.00272456	0.00264337	0.00371768	0.00117403	0.00098972
708	-0.000388444	-0.000447699	-0.000235002	0.000417027	-0.000361624	-0.000298664	0.00448711	0.00266607	0.00335447	0.00253791	0.000790586	0.00151979	0.00678402	0.00720031	0.00634566	0.00271428	0.00060239	0.00064427	0.00474281	0.00248602	0.00292169	0.00372815	0.00117018	0.00109879
707	-0.000483359	-0.000302951	-0.00043974	0.0003921	-0.000231368	-0.000288091	0.00472238	0.00265639	0.00358249	0.00247519	0.000728369	0.00147629	0.00693817	0.00720616	0.00638074	0.00272829	0.000695247	0.000475367	0.00497214	0.00264105	0.00297289	0.00384074	0.00151762	0.000956983
706	-0.000398641	-0.000211362	-0.000263215	0.00050026	-0.000447807	-0.000330025	0.00466174	0.00270547	0.00364126	0.00242706	0.000990663	0.00137014	0.00679657	0.00703445	0.00652649	0.00285406	0.000634387	0.000610807	0.00499497	0.00270187	0.00298834	0.00402967	0.00142242	0.00106889
705	-0.00040553	-9.72032e-05	-1.70779e-05	0.00033904	-0.000367207	-0.000381759	0.00451538	0.00250948	0.00357244	0.00243343	0.00107558	0.00145631	0.00653905	0.00714194	0.00639616	0.0029956	0.000587947	0.000783357	0.00496305	0.00282188	0.00318913	0.00404356	0.00117265	0.000895873
704	-0.000353183	-0.000163252	-0.000100589	0.000356839	-0.000480178	-0.000599148	0.00448127	0.00257099	0.00352442	0.00230001	0.000735657	0.00136437	0.00649131	0.00701495	0.00628117	0.00304987	0.00043199	0.00084764	0.00502349	0.00251092	0.00316588	0.00396057	0.00131109	0.000768207
703	-0.000364844	-0.00020079	-0.000222351	0.000299145	-0.000493601	-0.000797234	0.00447844	0.00254686	0.00344125	0.00241546	0.000616076	0.00120612	0.00646282	0.00682	0.00615523	0.00295503	0.000283657	0.000789117	0.00491704	0.00247976	0.00305881	0.00383433	0.00143184	0.000987493
702	-0.000387554	-0.000132841	-0.000159331	0.00029974	-0.000385382	-0.000551572	0.00470345	0.00264154	0.00340204	0.00251764	0.000571904	0.00155105	0.00651141	0.00680404	0.0061173	0.00308907	0.00044503	0.0006762	0.00490611	0.00251519	0.00311337	0.00404907	0.00115987	0.00109542
701	-0.000450592	-0.000238209	-0.000102965	0.000498557	-0.000638587	-0.000641082	0.00465902	0.00268015	0.00314742	0.00248555	0.000822492	0.00149201	0.00659718	0.00685119	0.00640121	0.00309414	0.000474237	0.000717997	0.0048209	0.00263539	0.0029955	0.00395197	0.00121813	0.0011313
700	-0.000436635	-0.00048007	-0.000227756	0.000463653	-0.000618808	-0.000615185	0.00455876	0.00258705	0.00320251	0.00264694	0.00122773	0.00148955	0.00668356	0.00713746	0.00646664	0.00303359	0.000480277	0.000599717	0.00492981	0.00260597	0.00314219	0.00383687	0.001404	0.00124517
699	-0.000501653	-0.000356229	-0.000178457	0.000364441	-0.000397142	-0.000575271	0.00445599	0.00253364	0.00319792	0.00256599	0.00117521	0.00179822	0.00659555	0.00737978	0.00624419	0.00294761	0.000335927	0.000555517	0.00502787	0.00277238	0.00339859	0.00401256	0.00139408	0.00129691
698	-0.000457423	-3.45998e-05	3.31117e-05	0.000283742	-0.000558106	-0.00075239	0.00450832	0.00257995	0.00303925	0.00246541	0.00102551	0.00163432	0.00642108	0.00686788	0.00602808	0.00274073	0.000501997	0.000642237	0.00473965	0.00272758	0.00335771	0.00389893	0.00135476	0.0015222
697	-0.000392127	2.78255e-05	0.000207201	0.000217634	-0.000322957	-0.000656881	0.00456067	0.00236648	0.00323235	0.00259343	0.00133114	0.00173528	0.0065852	0.00690707	0.00617311	0.00275433	0.000636503	0.000831983	0.0046198	0.002821	0.00332034	0.0036587	0.00166432	0.00155664
696	-0.000336216	-0.000243793	1.83815e-05	0.000308886	-0.000172863	-0.000502333	0.00456466	0.00265207	0.00339173	0.00235507	0.00118582	0.00155532	0.00644465	0.00708123	0.00619005	0.00283832	0.000855463	0.000819763	0.00462224	0.00268584	0.00309734	0.00369519	0.00161353	0.00167453
695	-0.000429745	-0.000337282	-0.000203819	0.000333456	-0.000472635	-0.000635914	0.0043173	0.00259851	0.00328091	0.00235394	0.00127476	0.00144778	0.00653311	0.00715105	0.00617363	0.00277421	0.00071075	0.00065278	0.00473236	0.00270588	0.00332722	0.00365303	0.00123669	0.00146275
694	-0.00045964	-0.000421446	-0.000419605	0.000288652	-0.000381521	-0.000674344	0.00427582	0.00226759	0.00345141	0.00232622	0.000947501	0.00153339	0.00661656	0.00698671	0.0061933	0.00288641	0.000619147	0.000873777	0.00488311	0.00267842	0.00310382	0.00385011	0.00124381	0.00115014
693	-0.000462967	-0.000224726	-0.000323799	0.000406335	-0.000299198	-0.000571113	0.00452717	0.00238966	0.00341692	0.00242292	0.00113092	0.00141686	0.00674857	0.00748826	0.00653715	0.00279609	0.000787477	0.000936557	0.00509004	0.00260098	0.0029962	0.0039477	0.00142367	0.0011132
692	-0.000560812	-0.000345954	-0.000231379	0.000360402	-0.000460518	-0.000500848	0.00451679	0.00257092	0.00341482	0.00253107	0.00146156	0.00156325	0.00695203	0.00765591	0.00676551	0.00292844	0.000724277	0.000928417	0.00504821	0.00279436	0.00327351	0.0038984	0.0014421	0.00109511
691	-0.000548081	-0.000437424	-0.000100648	0.000200409	-0.000637399	-0.0004996	0.00445878	0.00259448	0.00316296	0.00228287	0.00123223	0.00147973	0.00692336	0.0073044	0.00661291	0.00300039	0.000886387	0.000910087	0.00495201	0.0030916	0.0032841	0.00391567	0.00154307	0.00122584
690	-0.000468807	-0.000504185	-0.000194494	0.000182472	-0.000393876	-0.000573727	0.0044866	0.00266075	0.00319578	0.00229094	0.00102175	0.00148184	0.00697977	0.00742922	0.00666147	0.00287564	0.000935653	0.00104951	0.00468848	0.0031747	0.0034124	0.00385173	0.00145962	0.00123891
689	-0.000513592	-0.000325819	-0.000357239	0.000227613	-0.000482673	-0.000578597	0.00471262	0.00239857	0.00336642	0.00235727	0.00112894	0.0017466	0.00720723	0.00751556	0.00672363	0.00273004	0.00108803	0.000917513	0.00472852	0.00284721	0.00329915	0.00376464	0.0013731	0.00111336
688	-0.000353975	1.25607e-05	-0.000121556	0.000216031	-0.0005154	-0.000652367	0.00483749	0.00239324	0.00349658	0.00233434	0.0011666	0.00190489	0.00731595	0.00769024	0.00662486	0.00263748	0.000770207	0.000863397	0.00490219	0.00289651	0.00342157	0.00355416	0.00131611	0.00132526
687	-0.000339106	1.34516e-05	-0.000130584	0.000159822	-0.000345052	-0.000469249	0.00465641	0.00261208	0.00328307	0.00237065	0.000949961	0.00172906	0.00715015	0.00758592	0.00638416	0.0027125	0.00068608	0.0007851	0.00498463	0.00290209	0.00339906	0.00349106	0.00124552	0.00139573
686	-0.00046457	0.000100229	-6.41196e-05	0.000232345	-0.000428979	-0.000328065	0.00463148	0.00269785	0.00328617	0.0025505	0.00100688	0.00182215	0.00732673	0.0079694	0.00658779	0.0028525	0.00090013	0.00054999	0.00488643	0.00298124	0.00347411	0.00360791	0.0012336	0.000995827
685	-0.000575186	-5.96055e-05	-0.000158916	0.000200667	-0.000784345	-0.000581389	0.00445728	0.00262356	0.00305127	0.00249463	0.00102886	0.00167568	0.00743444	0.00785162	0.00682692	0.00290233	0.00099728	0.00091912	0.00490177	0.00287338	0.00350274	0.00382516	0.00152814	0.0010541
684	-0.000472886	-0.000185584	-2.99075e-05	0.000158099	-0.000655218	-0.000714673	0.00460594	0.00267775	0.00320073	0.00250012	0.000989797	0.00167856	0.00731831	0.00755359	0.00672852	0.0029484	0.000614237	0.00106066	0.00470163	0.00290241	0.00364973	0.00394667	0.00162824	0.0016994
683	-0.000415806	2.83006e-05	-3.15112e-05	0.0003154	-0.000660089	-0.000748529	0.00457215	0.00253774	0.00334083	0.00248685	0.000904446	0.00157206	0.00723632	0.00738907	0.00696706	0.00310572	0.00060457	0.00097936	0.00484575	0.00314281	0.00352288	0.00396372	0.00186392	0.0017974
682	-0.000504227	-0.000125594	-0.000175547	0.000278277	-0.000516707	-0.000626233	0.00433801	0.00239206	0.00320329	0.00259125	0.00108606	0.00144035	0.00717148	0.00742795	0.00712734	0.00288027	0.00084542	0.00101161	0.00490784	0.00327371	0.00347696	0.00360625	0.00164832	0.00161738
681	-0.000510583	-9.82129e-05	6.85865e-06	0.000311896	-0.000584834	-0.000590417	0.00427584	0.00239845	0.00303648	0.0025488	0.00124369	0.00136136	0.00714703	0.00729294	0.00718537	0.00250976	0.000890127	0.00117921	0.00471594	0.00296392	0.00346397	0.00353612	0.00129881	0.00130119
680	-0.000488487	-0.000120486	-8.62832e-07	0.000389328	-0.000322838	-0.000342439	0.00417164	0.00228573	0.00308639	0.00230537	0.000809652	0.0010859	0.0067148	0.00702401	0.00653649	0.00235671	0.000517393	0.000916833	0.00459252	0.00296656	0.00335578	0.00348623	0.00130394	0.00140147
679	-0.000395394	-0.000106707	-0.000329739	0.000319637	-0.000320224	-0.000487127	0.00412327	0.00242601	0.00309172	0.00228132	0.000568577	0.00127771	0.00644532	0.00700474	0.00622356	0.00231173	0.00060326	0.00097609	0.00467373	0.00292942	0.00331567	0.00347403	0.00133686	0.00155372
678	-0.000421132	2.09949e-05	-0.000156362	0.000343831	-0.000524666	-0.000480237	0.0042698	0.00262164	0.00340157	0.0024167	0.000916163	0.00149919	0.00653942	0.00702492	0.00661254	0.00266045	0.00067935	0.00090494	0.00499651	0.00279102	0.00336354	0.00383136	0.00131792	0.00163617
677	-0.000470173	-0.000151135	7.01154e-05	0.000270497	-0.000632113	-0.000683075	0.00431932	0.00262861	0.00362231	0.00242821	0.00130849	0.00138577	0.00677374	0.00725861	0.006609	0.00281343	0.00070139	0.00051916	0.00506246	0.00293518	0.00332499	0.00391836	0.00135003	0.00120837
676	-0.000413787	-0.000225736	-9.82129e-05	0.000360601	-0.000581211	-0.000569985	0.0045595	0.0027441	0.00317371	0.00234379	0.000999063	0.00159599	0.00674588	0.00749336	0.00660486	0.00272008	0.00050548	0.0003874	0.00495141	0.0029128	0.00324429	0.00388398	0.00150541	0.00151984
675	-0.000501871	9.94571e-05	-8.96005e-05	0.000363808	-0.000474476	-0.000388292	0.00469967	0.00269482	0.00317996	0.00222284	0.000813702	0.00127925	0.00672094	0.00727522	0.00669593	0.00268917	0.000694203	0.000630883	0.00485004	0.00290328	0.00309038	0.00387109	0.00127345	0.00147196
674	-0.000481142	-1.19105e-05	9.99322e-05	0.000444745	-0.000434978	-0.000365187	0.00460567	0.00248624	0.00349852	0.0023287	0.000959844	0.00148282	0.00683826	0.00697648	0.00653611	0.00273028	0.00092093	0.00102315	0.0048742	0.00287071	0.0031447	0.00400117	0.00116037	0.00127631
673	-0.000461898	-0.000162539	6.58389e-05	0.000495231	-0.000410803	-0.000419772	0.00463416	0.0025823	0.0036547	0.00254995	0.000805593	0.00165828	0.00686596	0.00698153	0.00661214	0.00271177	0.000757773	0.000952123	0.00491116	0.00291199	0.0033912	0.00383419	0.00136694	0.00142948
672	-0.000467065	9.07258e-05	0.000106228	0.000374084	-0.000508747	-0.000408843	0.00479993	0.0026258	0.00335328	0.0024787	0.000645293	0.00179027	0.00682108	0.00707515	0.00650661	0.00275196	0.00061655	0.00117339	0.00500126	0.00307162	0.00327292	0.00391012	0.00109819	0.00131303
671	-0.000444752	-7.20193e-05	2.11731e-05	0.00056524	-0.000507857	-0.000566599	0.00473455	0.00270737	0.00324912	0.0023698	0.000806593	0.00178752	0.00674985	0.00730773	0.00625202	0.00265447	0.000809427	0.00120626	0.00484759	0.00290682	0.0034898	0.00371031	0.00116208	0.00142586
670	-0.000405867	-0.000134741	-7.99783e-05	0.000550628	-0.000456063	-0.00047507	0.00459292	0.0025764	0.00323855	0.00244258	0.0010527	0.00160407	0.00718842	0.00740481	0.00659179	0.00253734	0.000972177	0.00105539	0.00476988	0.00276922	0.00318119	0.00377405	0.00150585	0.00154475
669	-0.00048035	-0.000113537	-0.000173943	0.000481986	-0.000522527	-0.00046426	0.00456035	0.0023207	0.00314203	0.00226572	0.000820677	0.00112431	0.0071455	0.00718668	0.00649733	0.00260956	0.00114215	0.00133507	0.00487588	0.00239393	0.00315088	0.0038504	0.00175878	0.00153206
668	-0.000318278	-0.000295348	-0.000166221	0.000397307	-0.000525972	-0.000521696	0.00455439	0.00236564	0.00310233	0.00226419	0.000998944	0.00135294	0.00698569	0.00721604	0.00640962	0.00276863	0.000931257	0.000987207	0.00495038	0.00242389	0.00340791	0.0039315	0.00181055	0.0016089
667	-0.000325821	-0.000212313	-0.000126723	0.000445319	-0.000659554	-0.000431354	0.00434229	0.00244516	0.00287613	0.00242373	0.00108194	0.00161923	0.00695993	0.00761188	0.0066316	0.00277154	0.00066518	0.00090739	0.00492902	0.00274704	0.00342529	0.00405889	0.00189081	0.00153171
666	-0.000379753	-0.000200433	-0.000146739	0.000471631	-0.000522765	-0.000554898	0.00448775	0.00243335	0.00314147	0.00244648	0.000909547	0.00164102	0.0066829	0.00738444	0.00649908	0.00267918	0.00059212	0.000952	0.00476616	0.00293349	0.00355335	0.0038706	0.00170907	0.00139266
665	-0.000378209	-0.000180001	-0.000152857	0.000479096	-0.000515162	-0.000483029	0.00461864	0.00287948	0.00334734	0.00236751	0.000713959	0.00162213	0.0066636	0.00717589	0.00658051	0.00262125	0.00093923	0.00112763	0.00471399	0.00278867	0.00329205	0.00380499	0.001778	0.00151493
664	-0.000392622	-8.26512e-05	-3.84011e-05	0.000431519	-0.000351051	-0.000448282	0.00480322	0.00284426	0.00339569	0.00251968	0.000701148	0.00152985	0.00676831	0.00723341	0.00650771	0.00277088	0.00089189	0.00103177	0.00495272	0.00256585	0.00333437	0.00383358	0.00180934	0.00168852
663	-0.00051086	-0.000153511	5.8058e-05	0.000591552	-0.000342439	-0.000449351	0.00467569	0.00278504	0.00330191	0.00253896	0.000846233	0.0018097	0.00678311	0.00749473	0.0066595	0.00273129	0.000917093	0.000733383	0.00498728	0.00257446	0.00372681	0.00381792	0.00158617	0.00149375
662	-0.000484488	-0.000177625	-6.44166e-05	0.000567437	-0.000275915	-0.000434562	0.00474532	0.00277025	0.00338215	0.00235693	0.000774984	0.00182825	0.00672692	0.00743713	0.00664948	0.00256038	0.000940517	0.000862647	0.00500974	0.00276174	0.00409494	0.00383079	0.00150807	0.0013651
661	-0.000474529	-0.000100648	-3.95296e-05	0.000345197	-0.000369286	-0.000359842	0.00469738	0.0027263	0.00379335	0.00230565	0.00083855	0.0018623	0.00678408	0.00731219	0.00659848	0.00276738	0.000759253	0.000872643	0.00496937	0.00316371	0.00369756	0.00381727	0.00154713	0.0013276
660	-0.00057477	-0.000194553	0.000135095	0.000428173	-0.000497522	-0.00046034	0.00454463	0.00272604	0.00353792	0.00230805	0.00119224	0.00187725	0.00671094	0.00715269	0.00685624	0.00294844	0.000917133	0.000693683	0.0048914	0.00352424	0.00356273	0.0039105	0.0016011	0.00101979
659	-0.000471638	-0.000109914	0.000141153	0.000524632	-0.000403616	-0.000284824	0.00448505	0.00261924	0.00339204	0.00236786	0.000785807	0.00178693	0.0067328	0.00726443	0.00647744	0.00296354	0.000783753	0.000675053	0.0050767	0.0035926	0.00327757	0.00406176	0.00163963	0.000995063
658	-0.000448811	-0.000169666	-2.61655e-05	0.000634931	-0.000343923	-0.000220261	0.00437434	0.0024401	0.00331839	0.00241152	0.000696914	0.00176728	0.00696959	0.00722709	0.00639709	0.00291132	0.000601543	0.000657553	0.00509614	0.00327963	0.00329085	0.00391341	0.00145037	0.0010526
657	-0.00041836	-0.000246109	3.66161e-05	0.000498003	-0.000346299	-0.000342736	0.00460432	0.00271553	0.00333574	0.00246303	0.00100715	0.00151552	0.00703461	0.00709548	0.00643797	0.00266547	0.000702123	0.000507303	0.00483264	0.00288803	0.00352577	0.00375141	0.00147431	0.0015558
656	-0.000509909	-0.000136583	0.00012773	0.000407682	-0.000492532	-0.000487365	0.00470543	0.00264779	0.00323023	0.0022739	0.000960013	0.00168572	0.00687083	0.00726496	0.00669524	0.00246777	0.00077993	0.00064267	0.00468439	0.0030208	0.0036352	0.00357243	0.00137941	0.00170627
655	-0.000511335	-0.000100351	7.77181e-05	0.000561121	-0.000596475	-0.000543019	0.00466166	0.00287719	0.00309535	0.0023347	0.00116747	0.0017944	0.00698618	0.00741831	0.00694866	0.00245222	0.000932337	0.000773577	0.0048008	0.00299964	0.00359377	0.00357629	0.00145886	0.00159488
654	-0.000461561	-1.83847e-05	-0.000113834	0.000388615	-0.000646071	-0.000499185	0.00469055	0.00282263	0.0031745	0.00241419	0.0011781	0.00192299	0.00701311	0.00725028	0.00685048	0.00282703	0.00095612	0.00069139	0.00484693	0.00303356	0.00361332	0.00386613	0.00151329	0.00132501
653	-0.000432576	-0.000189267	-0.00020566	0.000378677	-0.000567253	-0.000641557	0.00477893	0.00257222	0.00340757	0.00224228	0.000938101	0.00182084	0.00680395	0.00714124	0.00673693	0.00288567	0.00112387	0.000608253	0.00488516	0.00298022	0.0035993	0.00389947	0.00163534	0.00150366
652	-0.000384663	-0.000162064	-0.000178279	0.000436964	-0.000770506	-0.000650466	0.00486347	0.00263045	0.00343545	0.00220985	0.000880088	0.00162492	0.0066201	0.00717655	0.00671112	0.0027398	0.0011938	0.00057822	0.00504425	0.00336704	0.00362025	0.00384641	0.0013803	0.00177992
651	-0.000396285	-0.000195444	-8.29481e-05	0.000489905	-0.000624807	-0.00059701	0.00481823	0.00245606	0.00342766	0.00222646	0.000807387	0.00163828	0.00656615	0.00718427	0.00642275	0.00265778	0.00103557	0.000839153	0.00502247	0.00328225	0.0034798	0.00394206	0.00103573	0.00152112
650	-0.000368448	-0.000164796	-1.14353e-05	0.00036068	-0.000427612	-0.000467705	0.0048419	0.00261091	0.00371443	0.00219605	0.000629636	0.00171243	0.00682821	0.00720668	0.00633433	0.00275075	0.000895497	0.000985297	0.00498838	0.00319337	0.00331306	0.00420393	0.00131249	0.00130525
649	-0.000488943	-4.9924e-05	0.00012773	0.000366896	-0.00041306	-0.000431651	0.00479417	0.00288316	0.00367758	0.00226166	0.000742158	0.00186813	0.00697406	0.00723966	0.00675214	0.00282477	0.000888743	0.000971243	0.00499451	0.00317963	0.00325263	0.00414166	0.00172348	0.00132469
648	-0.000476153	-0.000167231	2.02822e-05	0.000467533	-0.000269322	-0.000406943	0.00478627	0.00268553	0.00353781	0.0024511	0.000793059	0.00181134	0.00699913	0.00747458	0.00676479	0.0027278	0.0006685	0.00068371	0.00484274	0.00299554	0.00356824	0.00381519	0.00160559	0.00137056
647	-0.000408659	-0.000171923	0.000140203	0.000474205	-0.000327768	-0.000397914	0.00470816	0.00260313	0.00369667	0.00239804	0.000711982	0.00162608	0.00686083	0.00748324	0.00643574	0.00278304	0.000986373	0.00109762	0.00496671	0.0031801	0.00337504	0.0037588	0.00154057	0.00135437
646	-0.000386326	-0.000194969	0.000142579	0.000339951	-0.000515637	-0.000427791	0.00457201	0.00276701	0.00355614	0.00243898	0.000847325	0.00174248	0.00701685	0.00744343	0.00661889	0.00291751	0.00103654	0.00108055	0.00517106	0.00325459	0.00353684	0.00373559	0.00146617	0.00126571
645	-0.000320436	3.7804e-05	-4.70729e-05	0.000357413	-0.000463844	-0.000354021	0.00434226	0.00294115	0.00344245	0.00234866	0.00108419	0.00160818	0.00694221	0.00717597	0.00658896	0.00299015	0.000895203	0.000994863	0.0051547	0.00338322	0.00380006	0.00390533	0.00161714	0.00149116
644	-0.000359598	4.31496e-05	1.14915e-05	0.000367015	-0.000310721	-0.000204283	0.00419762	0.00276558	0.00328322	0.00232937	0.000948359	0.00156721	0.00691441	0.00716843	0.00632008	0.00292268	0.000712077	0.000895137	0.00506517	0.00300392	0.00374174	0.00403734	0.0014256	0.00160212
643	-0.000338453	-0.000182912	9.79722e-05	0.00048452	-0.000360733	-0.000258334	0.00426772	0.00275837	0.00328011	0.00235927	0.000797233	0.00166484	0.00714109	0.00729564	0.00627753	0.00276619	0.00061166	0.00107922	0.00491549	0.00277878	0.00341657	0.00391941	0.00139721	0.00147977
642	-0.000422755	-8.22948e-05	-2.32551e-05	0.00052386	-0.000460993	-0.000566065	0.00461676	0.00305005	0.00356644	0.00240575	0.00100019	0.00167587	0.00729486	0.00740011	0.00658175	0.00278129	0.000976793	0.00113787	0.00484107	0.00289625	0.00324229	0.00385433	0.00169316	0.00155245
641	-0.000428972	5.81768e-05	-2.91947e-05	0.00051014	-0.000418228	-0.000408131	0.00463097	0.00277497	0.00339637	0.00249115	0.00110825	0.0017078	0.00710634	0.00724386	0.00687133	0.00276312	0.00116068	0.00106588	0.00491437	0.00293222	0.0032975	0.00397399	0.00176723	0.00168989
640	-0.000318852	-1.92756e-05	-4.08364e-05	0.000548133	-0.000381521	-0.000206956	0.00465867	0.00259974	0.00334885	0.00254728	0.00105349	0.00159756	0.00713156	0.00741546	0.00667146	0.00297107	0.00102552	0.00107458	0.0048545	0.0032479	0.00323792	0.00404495	0.00152123	0.0014452
639	-0.000299944	4.91486e-05	0.000140381	0.000505586	-0.000351526	-0.000229646	0.00462505	0.002515	0.00333882	0.00254136	0.00107441	0.0016262	0.00706391	0.0077526	0.00688406	0.0028006	0.00093638	0.00095473	0.0047277	0.00333483	0.00337421	0.00379396	0.00152796	0.00130712
638	-0.000438198	-6.49511e-05	0.000104031	0.000523009	-0.000438126	-0.00044062	0.00460642	0.00262477	0.00353252	0.00242399	0.000901692	0.00172207	0.00709284	0.00750552	0.00687544	0.00272289	0.00095879	0.0008511	0.00483612	0.00354555	0.00377327	0.00392713	0.00165345	0.0012802
637	-0.000482211	-0.000184515	7.85497e-05	0.000546866	-0.000517419	-0.00040427	0.00464095	0.00269229	0.00329177	0.00231411	0.000660899	0.001917	0.0069631	0.00722802	0.00672333	0.00278298	0.00091749	0.00094137	0.00490146	0.00324869	0.00377446	0.00406114	0.00177911	0.00132615
636	-0.00042826	-8.51458e-05	4.0655e-05	0.000429896	-0.000373503	-0.000378195	0.00474671	0.00294091	0.00357651	0.00239683	0.000921409	0.00199517	0.00686503	0.00733107	0.00660139	0.00280856	0.000875973	0.000886303	0.00474806	0.00313667	0.00376003	0.00377525	0.00151599	0.00136661
635	-0.000422201	-7.2776e-06	5.18808e-05	0.000470978	-0.000355625	-0.000556858	0.00460367	0.00289867	0.0035503	0.00220288	0.001003	0.00157249	0.00694536	0.00710737	0.00665596	0.00281321	0.000972373	0.000772093	0.00465869	0.00330856	0.00396756	0.00378125	0.00127498	0.00112928
634	-0.000388623	-2.16954e-06	5.58604e-05	0.000519148	-0.000371424	-0.000368989	0.00455892	0.00282066	0.00357137	0.00227035	0.000952178	0.00176686	0.00710214	0.00735169	0.00664208	0.00275982	0.00086413	0.00045293	0.00480504	0.00324928	0.00348241	0.00386595	0.0013826	0.000897333
633	-0.000334473	-0.000109617	1.0957e-05	0.000564567	-0.00060491	-0.000617264	0.00461076	0.00306472	0.00385302	0.00238554	0.00118818	0.00188377	0.00725568	0.00763307	0.00676416	0.0027376	0.0009457	0.00085328	0.00494729	0.00314088	0.00318971	0.00381491	0.00157805	0.00133619
632	-0.000327167	-0.000124525	-1.51619e-06	0.000496003	-0.000504768	-0.000590773	0.00461256	0.00291105	0.00383146	0.00232355	0.00107362	0.001559	0.00698761	0.00744931	0.00681092	0.0027577	0.000968553	0.000889083	0.00504452	0.00316224	0.00359565	0.00402414	0.00141644	0.00130638
631	-0.000329643	-0.000269036	-5.34283e-05	0.000474285	-0.000118278	-0.000220914	0.00463026	0.00256399	0.0037389	0.0022635	0.00117143	0.00143437	0.00683703	0.0076611	0.00667773	0.00274301	0.000925113	0.000989143	0.00498778	0.0031785	0.00368663	0.00401773	0.00130119	0.00118786
630	-0.000409312	-6.21001e-05	-2.46806e-05	0.000472325	-0.000140908	-0.000302406	0.00454829	0.00263789	0.00350751	0.0025377	0.00124787	0.00170124	0.00703219	0.00778683	0.0067161	0.00270711	0.00106146	0.00134852	0.00500647	0.00304999	0.00358485	0.00390339	0.00160017	0.0010428
629	-0.000388405	-8.03941e-05	-0.000110211	0.000507883	-0.00035218	-0.000557452	0.00460751	0.00265894	0.00340151	0.00260051	0.000934242	0.00171749	0.00704997	0.00759574	0.00676918	0.0026613	0.00121966	0.00118164	0.00510764	0.00278259	0.00350408	0.00397836	0.00147864	0.000833003
628	-0.000338018	3.07953e-05	-0.000110211	0.000508457	-0.000301693	-0.000464794	0.00457846	0.00259622	0.00337716	0.0026283	0.00105588	0.00181918	0.00728724	0.00761837	0.00692308	0.00289294	0.00110229	0.000957483	0.00526065	0.00291567	0.00360537	0.00410488	0.0012091	0.00102474
627	-0.00039282	7.39322e-06	8.04503e-05	0.000512912	-0.000314166	-0.000127247	0.00451699	0.00260984	0.00322477	0.00253849	0.00101423	0.00153816	0.00712641	0.00767793	0.0070687	0.00297667	0.00111937	0.000940413	0.00509433	0.00306082	0.00367295	0.0042126	0.00137789	0.00100542
626	-0.000354727	-0.000255018	1.78469e-05	0.000384497	-0.000416862	-0.000197512	0.00459589	0.00270014	0.00331477	0.00247967	0.0011221	0.00166826	0.00708107	0.00769986	0.00670219	0.00293509	0.00100795	0.00101674	0.00525301	0.0034748	0.00354335	0.00435068	0.00149786	0.00115248
625	-0.000292441	1.2917e-05	-3.35306e-05	0.000411641	-0.000509876	-0.000546405	0.00469353	0.00296023	0.00340232	0.00265288	0.00138824	0.00195399	0.00724776	0.00788023	0.00670668	0.00284659	0.00077987	0.00110578	0.00533947	0.00333728	0.00361247	0.00423125	0.00175252	0.00140357
624	-0.0002827	9.48242e-05	7.86685e-05	0.000421778	-0.000251206	-0.000479822	0.00452073	0.00275427	0.0032589	0.00224228	0.00118816	0.00170009	0.0071766	0.00777084	0.00653784	0.00285528	0.000864453	0.000936323	0.00516658	0.00319034	0.00383621	0.0040736	0.00154713	0.00131252
623	-0.000240727	7.2907e-05	-1.0485e-05	0.000600303	-0.000272173	-0.000302643	0.00454257	0.00287049	0.00343499	0.00225606	0.000993814	0.0014653	0.00697875	0.00757923	0.00677079	0.00280822	0.000661437	0.000775297	0.00529173	0.00310968	0.00365594	0.00371675	0.00149498	0.00139371
622	-0.000277434	0.000149469	6.56607e-05	0.000617785	-0.000337212	-0.000424405	0.00458911	0.0031806	0.00365339	0.00243446	0.000743503	0.00165	0.00688166	0.00756857	0.00674018	0.00301348	0.000663333	0.000821623	0.00526051	0.00359354	0.00359045	0.00380232	0.00151509	0.00157371
621	-0.000349837	-5.7586e-05	0.000185759	0.00051402	-0.000264867	-0.00032557	0.00462079	0.00312588	0.00364832	0.00249335	0.000991476	0.00167341	0.00694654	0.00747759	0.00695562	0.00294226	0.00079781	0.00081028	0.00503771	0.00347312	0.00353026	0.003924	0.00158958	0.00164113
620	-0.000280066	9.59087e-06	-5.04585e-05	0.000670727	-0.000273361	-0.000436047	0.00455144	0.00280684	0.00345414	0.0024368	0.00143212	0.00173457	0.0069761	0.00747917	0.00700543	0.00276566	0.00110829	0.00103447	0.00499022	0.00313599	0.00356803	0.00379162	0.001333	0.00124836
619	-0.000346234	0.000168535	0.000102427	0.00063598	-0.000401241	-0.000541296	0.00463606	0.00293224	0.00360894	0.00250101	0.00158659	0.00169213	0.00710873	0.00760572	0.00687129	0.00276415	0.000707483	0.000792243	0.00497184	0.00307183	0.00358026	0.00380043	0.00194494	0.00148004
618	-0.00036233	7.99752e-05	0.000235058	0.000586068	-0.000451074	-0.000596654	0.0044919	0.00276076	0.00361511	0.00241047	0.00146031	0.00160702	0.00714677	0.00758315	0.00675926	0.00277759	0.000933983	0.000839303	0.00492429	0.00332006	0.00352313	0.00380737	0.00159555	0.00135654
617	-0.000375991	5.96617e-05	5.5207e-05	0.000438607	-0.000308642	-0.000518667	0.00450261	0.00247052	0.00332036	0.00244977	0.00143943	0.00148665	0.00718144	0.00734868	0.00681233	0.00284287	0.000998383	0.00119843	0.0048685	0.00320969	0.00365444	0.00386144	0.00135481	0.00170596
616	-0.000343462	-0.000195385	-0.000222054	0.00044522	-0.00027449	-0.000438898	0.00477213	0.00276845	0.00356554	0.00249931	0.00169935	0.00161327	0.00722002	0.0072948	0.0069231	0.00288623	0.00092683	0.00105056	0.00502289	0.00342365	0.00382213	0.00392548	0.00152709	0.00150702
615	-0.000358707	-0.000284954	-0.000116685	0.00044229	-0.000414783	-0.000515222	0.00472604	0.00262218	0.00388025	0.00243372	0.00101555	0.00155148	0.00696868	0.00713233	0.00658512	0.00283339	0.00061008	0.00079729	0.00500493	0.00349904	0.00392093	0.00399815	0.00180746	0.00123565
614	-0.000374981	-0.00031875	-1.75531e-05	0.000527444	-0.000259047	-0.000387401	0.0044983	0.00262172	0.00369382	0.00243562	0.000979638	0.00156273	0.00688689	0.00715683	0.00667061	0.00271386	0.00065098	0.0010086	0.00490847	0.00321245	0.00406377	0.00384795	0.00151478	0.0011018
613	-0.000298974	-2.45025e-05	0.000129214	0.000450467	-0.000310959	-0.00049966	0.00443193	0.00266102	0.00331949	0.00245642	0.00152692	0.00184362	0.00719587	0.00761851	0.00673969	0.00283016	0.000627997	0.000860587	0.0049149	0.00327221	0.00401965	0.00395181	0.00131378	0.001275
612	-0.000271355	-4.23213e-05	0.000111396	0.000535561	-0.000223587	-0.000325095	0.00452129	0.00244176	0.00352805	0.00251885	0.00137809	0.00182368	0.00717262	0.00788784	0.00683403	0.00276255	0.000643793	0.000823823	0.00487683	0.00320637	0.00383597	0.00396094	0.0014304	0.00156422
611	-0.000237836	-0.000130346	5.54446e-05	0.000748338	-0.000211233	-0.000352595	0.00483608	0.00288983	0.00379503	0.00273556	0.00131576	0.00174757	0.00718052	0.00768058	0.00717126	0.00290803	0.000978907	0.00133006	0.00486295	0.00345411	0.00418902	0.00397371	0.00181433	0.00189416
610	-0.00017058	-7.27914e-05	1.88567e-05	0.000589513	-0.00057931	-0.000685154	0.00474525	0.00290241	0.00405832	0.0025704	0.00142783	0.00164088	0.00726702	0.00785388	0.00710947	0.00287568	0.00103315	0.00141519	0.00498509	0.00339419	0.00386324	0.00389956	0.00178469	0.00151699
609	-0.000258842	1.08976e-05	-3.52531e-05	0.000531008	-0.000599742	-0.000684441	0.00484984	0.00298981	0.00396617	0.0025545	0.00147991	0.00163244	0.00718967	0.00751722	0.00699055	0.00290072	0.000564563	0.000838973	0.00508971	0.00338886	0.00363589	0.00398761	0.00191115	0.00162053
608	-0.00042133	8.91221e-05	6.19782e-05	0.000606164	-0.000485345	-0.000643042	0.00494037	0.00284335	0.00381209	0.00257529	0.00160504	0.00173898	0.00725908	0.00764858	0.007002	0.00290017	0.000535213	0.000699033	0.00521422	0.0034191	0.0036426	0.00404632	0.00166511	0.00164283
607	-0.000366013	0.000183859	0.00025353	0.000641227	-0.000317611	-0.000301931	0.00483415	0.00282815	0.00388765	0.00258163	0.00162248	0.0018467	0.00738249	0.00766686	0.0071908	0.00293909	0.000489913	0.000876113	0.00530629	0.0031075	0.00380392	0.00398484	0.00172399	0.00140556
606	-0.000324772	4.9208e-05	0.000323083	0.00063109	-0.000209154	-0.000319631	0.00465521	0.0029736	0.00381685	0.00246483	0.00137555	0.00165555	0.00736196	0.00754294	0.00709605	0.00299182	0.00064932	0.00076496	0.00522596	0.00322811	0.0038608	0.00388207	0.00156916	0.00129826
605	-0.000228788	-3.08578e-05	0.000100407	0.000550727	-0.000434265	-0.00045731	0.00474576	0.00313451	0.00380996	0.00252413	0.0013886	0.00161917	0.00720252	0.00761954	0.00684264	0.00315569	0.00106463	0.000809583	0.00523665	0.00336113	0.00371031	0.00387779	0.0016243	0.00155611
604	-0.000226669	-7.4404e-07	0.000267904	0.000559063	-0.000514331	-0.000524844	0.00470852	0.00285622	0.00356368	0.00249493	0.00149763	0.00156261	0.00725144	0.00760236	0.00696349	0.00304472	0.00103157	0.000895143	0.00505538	0.00332555	0.00396394	0.0038923	0.00185775	0.00133352
603	-0.000340868	8.2648e-05	8.68651e-05	0.000609628	-0.000562145	-0.000323788	0.00473574	0.00286426	0.00361752	0.00232642	0.00121467	0.00175012	0.00712133	0.00748677	0.0067524	0.00324433	0.00136316	0.00101041	0.0052776	0.00307868	0.00399765	0.00416372	0.00176715	0.00149423
602	-0.000326435	3.57845e-05	4.52285e-05	0.000614776	-0.000349626	-0.000286844	0.00462887	0.00285301	0.00374615	0.00256494	0.0012984	0.00198787	0.00737133	0.00767468	0.00692083	0.00310691	0.00126309	0.00077646	0.00521628	0.00319973	0.00375193	0.00413137	0.00205191	0.00161494
601	-0.000193764	-3.27585e-05	1.51741e-05	0.000441637	-0.000193473	-0.000171319	0.00457088	0.00289165	0.00373591	0.00251409	0.00111358	0.0019273	0.00723422	0.00751154	0.00661501	0.00289316	0.00116867	0.00062924	0.00504803	0.00327728	0.00386441	0.00411005	0.0019001	0.00135859
600	-0.000161314	5.2356e-05	5.21184e-05	0.000594343	-0.000285478	-0.000369761	0.00459565	0.00297348	0.00382178	0.00251675	0.00120981	0.00191092	0.00716841	0.00728062	0.0070036	0.0030304	0.00112529	0.000944853	0.00505536	0.0035148	0.00386827	0.00431698	0.00191255	0.00137751
599	-0.000242904	0.000119711	0.000129808	0.000654571	-0.000265699	-0.000284052	0.00465934	0.00278207	0.00361932	0.00261966	0.00135154	0.00191574	0.00723705	0.00728716	0.00720531	0.00310803	0.00080547	0.00109027	0.00512523	0.00348577	0.00373333	0.00432157	0.00186397	0.00174369
598	-0.000257021	3.84573e-05	0.000213022	0.000552073	-0.00022525	-0.000351883	0.0046495	0.00310783	0.00397698	0.00272624	0.00162113	0.00197852	0.00733945	0.00750865	0.00705545	0.00291801	0.00056446	0.00092297	0.00499182	0.0034088	0.00385576	0.0040571	0.00160594	0.0015064
597	-0.000270662	-6.32727e-06	9.69624e-05	0.000692605	-0.000137641	-0.00033537	0.00462002	0.00293051	0.00353611	0.00256248	0.00155689	0.00181027	0.00730696	0.00778017	0.00693229	0.00302979	0.00083151	0.00094869	0.00522284	0.00356108	0.00390576	0.00415978	0.00160417	0.00148698
596	-0.000219621	-8.10915e-06	8.91816e-05	0.000814109	-0.000147204	-0.000132652	0.00473137	0.00259232	0.00346883	0.00266987	0.00143244	0.00174997	0.0073662	0.00797218	0.00701109	0.00322368	0.00111063	0.00095703	0.00535996	0.00343855	0.00397104	0.0042349	0.00174361	0.00138486
595	-0.000173787	0.0001405	0.000128621	0.000690566	-0.000155282	-0.000177436	0.00474303	0.00264412	0.0037414	0.00275439	0.00139789	0.00163357	0.00730139	0.00756272	0.00689606	0.00323081	0.00111336	0.00112239	0.0053486	0.00350494	0.00395724	0.00422132	0.00185189	0.00157201
594	-0.000268147	-9.05948e-06	5.63355e-05	0.000576505	-0.000149461	-0.000217648	0.00472701	0.00279854	0.00378226	0.0026673	0.00122146	0.00182291	0.00741316	0.00784246	0.0069906	0.0032743	0.000959223	0.00117275	0.0055489	0.00371073	0.00393916	0.00430859	0.00159211	0.00162668
593	-0.000181192	-0.000223895	2.30144e-05	0.000621349	-2.17594e-05	-0.000166448	0.00485565	0.00278331	0.00385541	0.00284206	0.00155685	0.0022781	0.00754494	0.00795155	0.00719894	0.00323123	0.000953483	0.0010067	0.00548362	0.00358495	0.00398599	0.00430617	0.00152418	0.0014924
592	-0.000319565	2.81224e-05	0.000347198	0.000602323	-0.00014756	-0.000222459	0.00491708	0.00287825	0.00381796	0.0030563	0.00166648	0.00213452	0.00767973	0.00776401	0.00727922	0.00305864	0.00096398	0.00115969	0.00549869	0.00358	0.00371697	0.00434894	0.00178509	0.00132239
591	-0.000179668	0.000128383	0.000405168	0.00062125	-0.000166329	-0.000269203	0.00493001	0.00297021	0.00401885	0.00307471	0.00145119	0.00176545	0.00765728	0.00754421	0.00707065	0.00321531	0.0013046	0.00140533	0.00561605	0.00343971	0.00369547	0.00438139	0.00201113	0.00130046
590	-0.000142585	0.000193006	0.000258935	0.000669044	-8.60259e-05	-0.00011222	0.00492803	0.00289076	0.00413677	0.00296495	0.00110728	0.00172078	0.00760221	0.00743634	0.00682866	0.00328828	0.00123963	0.00137672	0.0056408	0.00342087	0.00377903	0.00458625	0.00166289	0.00142673
589	-0.000162581	0.000219437	0.000168119	0.00067631	-1.12463e-05	-0.000253938	0.00486075	0.00264251	0.00399443	0.00297186	0.00103003	0.00176476	0.00766476	0.00750402	0.00679352	0.00317767	0.00121086	0.00141334	0.00548675	0.00326048	0.00359839	0.00459012	0.00163056	0.00134528
588	-0.000196813	3.63191e-05	0.000181542	0.000573635	5.90192e-05	-0.000259047	0.00478495	0.00260657	0.00374365	0.00320814	0.00127982	0.00211452	0.00778072	0.0076883	0.00716645	0.00325512	0.00118048	0.00106751	0.00554403	0.00340892	0.00380836	0.00456104	0.00207976	0.00142408
587	-3.69981e-05	6.67892e-05	0.000213319	0.000576188	-0.000190325	-0.00040035	0.00496907	0.0026589	0.0036741	0.00320833	0.0012764	0.00216271	0.0079023	0.00777866	0.00733207	0.00329854	0.00144542	0.00139369	0.00558408	0.00371557	0.00391146	0.00444417	0.00180913	0.00150051
586	-0.000125775	0.000115375	0.000169366	0.000628655	-0.000134968	-0.000147085	0.00502744	0.00261365	0.00361334	0.00320055	0.00122089	0.00189301	0.00788949	0.00785299	0.00702465	0.00337383	0.00142292	0.00148213	0.00547376	0.00335198	0.00355879	0.00454823	0.0016308	0.00163478
585	-0.000221878	0.000173821	0.000143173	0.000652671	5.12383e-05	-5.78722e-05	0.00506931	0.00266676	0.00373737	0.00312001	0.001296	0.00187838	0.00798017	0.00791468	0.00691938	0.00344816	0.00121255	0.000912183	0.00538807	0.00311659	0.00380689	0.00443641	0.00158247	0.00163842
584	-0.000208573	-4.67166e-05	0.000225317	0.000760197	0.000163675	2.05899e-05	0.00513245	0.00266078	0.00374963	0.00329113	0.00155042	0.00199815	0.00796429	0.00776188	0.00675179	0.00347615	0.00112126	0.000949187	0.00544431	0.00330698	0.00415183	0.00469324	0.00149949	0.00161116
583	-6.2796e-05	0.000133194	0.000425185	0.000749704	-0.000119525	-0.000157539	0.00500174	0.00263667	0.00363363	0.0034028	0.001609	0.00251289	0.00823387	0.00792612	0.00690475	0.00360789	0.00098004	0.00144053	0.0055132	0.0032162	0.00392943	0.00467168	0.00148679	0.00199361
582	-0.000189666	7.81933e-05	0.000287505	0.000642712	-6.12578e-05	-0.000140195	0.00506606	0.0029333	0.0036451	0.00332279	0.00151844	0.002309	0.00819916	0.00794105	0.00715179	0.00356934	0.00092438	0.00117331	0.00567254	0.00318651	0.00373017	0.00466178	0.0015375	0.00174278
581	-0.000219958	0.000268617	0.00024468	0.000627031	9.58447e-05	4.19725e-05	0.00503754	0.0031175	0.00339208	0.00321483	0.00157033	0.00204942	0.00809948	0.00754361	0.00729622	0.00366471	0.00114604	0.000873123	0.00589759	0.00351391	0.00399597	0.00493605	0.00147959	0.00160254
580	-0.000173965	0.000209993	0.000341971	0.000584326	-2.56796e-05	-0.000159677	0.00508153	0.00281165	0.00335477	0.0034265	0.00162189	0.00234705	0.0081485	0.00778832	0.00735348	0.00378555	0.00118945	0.000959997	0.00594069	0.00399329	0.00373551	0.00504203	0.00166874	0.00164349
579	-6.94087e-05	0.000151547	0.000319638	0.000660333	-0.000238258	-0.000350992	0.00502142	0.00295616	0.0038193	0.00353755	0.00200349	0.00232648	0.00838016	0.00825415	0.00743608	0.00381087	0.00144886	0.00122423	0.00596718	0.00365418	0.0036799	0.00505325	0.00124518	0.00158599
578	3.00005e-05	0.000366205	0.000394655	0.000841015	-0.000186227	-0.000123386	0.00523142	0.00290768	0.00393196	0.0035559	0.0020916	0.00225927	0.00847997	0.00819139	0.00743457	0.0038277	0.00131026	0.0009167	0.00606131	0.00363672	0.00382964	0.00484877	0.00136686	0.00163806
577	2.96442e-05	0.000410158	0.000555143	0.000728539	9.49538e-05	0.000128513	0.00537669	0.00295416	0.00379551	0.00355861	0.00141335	0.00229086	0.00852509	0.00823302	0.00753262	0.00401806	0.00119588	0.00105861	0.00611363	0.00381996	0.00394207	0.0051516	0.00186947	0.00195535
576	2.78225e-05	0.000110802	0.000463971	0.000626655	0.000140629	5.38517e-05	0.00528928	0.00278667	0.00389506	0.00365881	0.00135609	0.00241488	0.00872045	0.00846282	0.00768972	0.00405762	0.00144475	0.00129709	0.00619823	0.00386437	0.00381732	0.00525419	0.00193768	0.00182536
575	-2.82867e-05	0.000128917	0.00048167	0.0005554	-2.39571e-05	-0.000275974	0.00530125	0.00290623	0.00400701	0.00383116	0.00138043	0.00237828	0.00851139	0.00825338	0.00754294	0.00397498	0.00124348	0.00144056	0.00610013	0.00369215	0.00386369	0.00530383	0.00168996	0.00163971
574	5.3442e-05	0.000270874	0.000498777	0.000690783	-0.000120119	-0.000355149	0.00514413	0.003069	0.00383432	0.00396526	0.00127466	0.00234325	0.00854026	0.00819757	0.00742767	0.00411004	0.00102541	0.00120734	0.00617879	0.00346391	0.00409642	0.00525273	0.00184218	0.00153932
573	7.65669e-05	0.000441816	0.000569339	0.000759782	2.54604e-05	-0.000203511	0.00537683	0.00338595	0.00392912	0.00391844	0.0012806	0.00234783	0.00870336	0.00814506	0.0074721	0.00407095	0.00120661	0.00126304	0.00629535	0.00358263	0.00436713	0.00525115	0.0020973	0.00170873
572	0.000115729	0.000432431	0.000516061	0.000759742	9.44786e-05	4.30416e-05	0.00553086	0.00312061	0.00388545	0.00384397	0.0014189	0.00223927	0.00871526	0.00796024	0.00733017	0.0040064	0.00140686	0.00162145	0.00608394	0.0037842	0.00423674	0.00511451	0.00219898	0.00200232
571	0.000112244	0.000330567	0.000601591	0.00068617	9.41816e-05	7.67192e-05	0.00553577	0.00306693	0.00395063	0.00382859	0.00164412	0.00218593	0.00879247	0.0079787	0.00728929	0.00425194	0.00126361	0.00152067	0.00617404	0.00398039	0.0040383	0.00500857	0.00216978	0.00188218
570	0.000157524	0.000421918	0.000538928	0.00074618	-7.56316e-05	-3.00155e-05	0.00576729	0.00321201	0.00435403	0.00381847	0.00163419	0.00217742	0.0086703	0.00827615	0.00776291	0.00433327	0.00146148	0.0015517	0.00650339	0.00387474	0.00454009	0.00529317	0.00204849	0.00194585
569	0.000313003	0.000406594	0.000394061	0.000837412	-5.42491e-05	9.00772e-06	0.00571079	0.00334532	0.00408254	0.00410634	0.0016976	0.00223501	0.00870623	0.00840311	0.00744488	0.00420079	0.00150264	0.00164573	0.00647583	0.00398621	0.00463654	0.00523673	0.00207726	0.00182346
568	0.000264674	0.000481433	0.000305442	0.000750159	7.50561e-05	8.64601e-05	0.00553805	0.00357082	0.00387308	0.00444053	0.00184609	0.0025507	0.00910366	0.00838862	0.00758434	0.00426185	0.00152307	0.00151755	0.0066164	0.00389715	0.00448766	0.00541809	0.00195156	0.00186674
567	0.000317339	0.000164496	0.000401723	0.000821078	-9.71924e-05	-0.000224181	0.00556283	0.003003	0.00371932	0.00425685	0.00175421	0.00210547	0.00918528	0.00826371	0.00732686	0.00442806	0.0018344	0.00175422	0.00698654	0.00373688	0.00429022	0.00553538	0.00178464	0.00205103
566	0.000409699	0.000241889	0.000596127	0.000784827	-0.000172625	-0.000199651	0.00563619	0.00314979	0.00384971	0.00459218	0.00184482	0.00218759	0.00930807	0.00835284	0.00731769	0.00457185	0.0019231	0.00207492	0.00703734	0.00384916	0.00435141	0.00564514	0.00175153	0.0016202
565	0.000385268	0.000177682	0.000575635	0.000722817	-0.000118278	-0.000138176	0.00583053	0.00325328	0.00410882	0.00444862	0.00180404	0.00256068	0.00939267	0.00857013	0.00742504	0.00458822	0.00233715	0.00218225	0.00688178	0.00385736	0.0044398	0.00584505	0.00198349	0.00171128
564	0.00038414	0.000453042	0.000694071	0.000660353	-0.000100281	-2.11061e-05	0.00594798	0.00339613	0.00414481	0.00479286	0.00192837	0.00265342	0.00950289	0.00849698	0.00784392	0.00472246	0.00215374	0.00221118	0.00687446	0.00395146	0.00458991	0.00572316	0.00198852	0.00174559
563	0.000532748	0.000517724	0.000494916	0.000706464	0.000187077	0.000114851	0.00591153	0.00324863	0.00434092	0.00501158	0.00208997	0.00285879	0.00953275	0.00872884	0.00789908	0.00506763	0.00204428	0.00199872	0.00705488	0.00405786	0.00449168	0.00579969	0.00211212	0.00190049
562	0.000592758	0.000470207	0.000543799	0.000836739	5.76531e-05	-6.89199e-05	0.00599846	0.00348714	0.00430586	0.00501892	0.00173189	0.00294588	0.00955012	0.00859516	0.00791816	0.00513035	0.00209121	0.00184555	0.00719773	0.00443071	0.00435106	0.00603222	0.00209011	0.00198848
561	0.000605331	0.000672154	0.000707969	0.000898412	-2.58062e-07	-0.00010628	0.00606423	0.00342814	0.00434195	0.00508432	0.00172508	0.00259987	0.00970295	0.0088219	0.00784661	0.00519844	0.00167075	0.00205569	0.00728862	0.00466522	0.00465317	0.00627238	0.00228214	0.00209427
560	0.000488696	0.000773483	0.000683617	0.000857231	4.23289e-05	-8.53726e-05	0.00615715	0.00333364	0.00442214	0.0053478	0.002153	0.00280826	0.0100781	0.0090534	0.00805638	0.00505484	0.00164114	0.00203749	0.00731021	0.00470613	0.00463271	0.00641194	0.0022104	0.00235016
559	0.000501962	0.000672688	0.000802587	0.00089758	7.52343e-05	6.96511e-05	0.00635902	0.00351643	0.0041759	0.00529732	0.00191899	0.00279621	0.010101	0.00894958	0.00797679	0.00525511	0.00213937	0.00211401	0.00750806	0.00431469	0.00474525	0.00656589	0.00262984	0.00246626
558	0.000402156	0.000774434	0.000823376	0.0008071	0.00031169	0.000130591	0.00640602	0.0034858	0.00431425	0.00534117	0.00188705	0.00294876	0.0101065	0.00910284	0.00790393	0.00539235	0.00244914	0.00228372	0.00777405	0.00438437	0.00470196	0.00658997	0.00245897	0.00240017
557	0.00046082	0.000667046	0.00066657	0.000753505	0.000371502	0.000218794	0.00634934	0.00343168	0.00453081	0.00538752	0.00188952	0.00336118	0.0102644	0.00937033	0.00804865	0.0054124	0.00241484	0.0024547	0.00776587	0.00448798	0.00490952	0.00653803	0.00199513	0.0022004
556	0.000599312	0.000800211	0.000808527	0.000768948	0.000357068	0.000410703	0.00661327	0.00337512	0.00462185	0.00544376	0.00187034	0.00304056	0.0104381	0.00923871	0.00840996	0.00526548	0.0022014	0.00256615	0.00769984	0.00437244	0.00513865	0.00655287	0.00224114	0.00243934
555	0.000652035	0.00071771	0.000950721	0.000721471	0.000396151	0.000343704	0.00652333	0.00326987	0.00472471	0.00574985	0.00195428	0.00292131	0.0103523	0.00897745	0.00847026	0.00538015	0.00241479	0.00283745	0.00785245	0.00466196	0.00525443	0.00674118	0.00181653	0.00248735
554	0.000680664	0.000843095	0.00121545	0.00077461	0.000326539	0.000267559	0.00649775	0.00360464	0.00465845	0.00566286	0.00187157	0.00275835	0.0104422	0.0086837	0.00829905	0.00547279	0.00267381	0.003115	0.00791165	0.00448609	0.00524018	0.00669029	0.00200285	0.00219363
553	0.000773619	0.000922924	0.00117292	0.000848618	6.98887e-05	0.000149479	0.00667111	0.00359635	0.00456777	0.00600228	0.00236317	0.00308899	0.0107386	0.00906322	0.00856994	0.00552619	0.00301368	0.0029095	0.00795733	0.00445535	0.00513407	0.00677366	0.00242702	0.00242964
552	0.000791161	0.00112624	0.00110503	0.000857389	0.000148885	-4.9141e-05	0.00680971	0.00352218	0.00474349	0.00602396	0.0027495	0.00310297	0.0107249	0.009638	0.0083828	0.00600225	0.00304749	0.00286752	0.00817864	0.00448083	0.00513431	0.00720199	0.00240649	0.00236307
551	0.000719509	0.000939436	0.00105146	0.000953096	0.000296128	0.000173832	0.00686392	0.0036677	0.00504332	0.00614004	0.00278163	0.00305676	0.0109174	0.00955235	0.00851341	0.00604976	0.00273431	0.00282234	0.00815858	0.00459345	0.00532117	0.00721935	0.00252224	0.00237796
550	0.000744732	0.00114091	0.00114851	0.000919537	0.000414029	0.000474732	0.00700631	0.00396914	0.00506417	0.00626402	0.00261501	0.00336494	0.0111969	0.00972052	0.00870411	0.00608371	0.00285271	0.00270998	0.00809827	0.00468423	0.00542323	0.00720398	0.00241094	0.0025561
549	0.000829927	0.00112148	0.00118575	0.00102942	0.00062239	0.000571963	0.00690301	0.00386994	0.00479937	0.00637674	0.00241736	0.00359168	0.0114243	0.00980156	0.00858457	0.00615593	0.00297673	0.0031093	0.00826832	0.00495117	0.00534087	0.00725669	0.00238032	0.00259183
548	0.000796764	0.00119217	0.00129522	0.000934901	0.000592217	0.000643298	0.00696567	0.00387042	0.00477466	0.00635422	0.00266155	0.00348686	0.0116162	0.00953219	0.00861197	0.00622019	0.00306286	0.00327336	0.00842871	0.00513277	0.00570837	0.00725681	0.00271909	0.00246802
547	0.00083424	0.00124432	0.00147703	0.000904866	0.000480969	0.00050443	0.00681411	0.00379485	0.00481949	0.00680966	0.00301676	0.00354532	0.0117143	0.0098884	0.00884244	0.00634397	0.00316783	0.00295085	0.00866721	0.00515506	0.00569723	0.00719692	0.00257015	0.00238643
546	0.000958954	0.00109167	0.00122442	0.000956046	0.000610274	0.000469446	0.00703113	0.0042229	0.00486379	0.00708987	0.00321689	0.00386864	0.0119101	0.0101056	0.0094802	0.00645552	0.00316646	0.00283064	0.00863478	0.00528567	0.00568036	0.00751639	0.00250338	0.00235026
545	0.00108446	0.00118985	0.00120684	0.000873367	0.00087714	0.000562935	0.00730185	0.00447264	0.00508186	0.00710024	0.00327585	0.00403654	0.0119247	0.0100932	0.00979332	0.00671272	0.00323362	0.00306297	0.00873957	0.00530016	0.00579161	0.00765201	0.00244329	0.0024901
544	0.00109721	0.0015094	0.0013675	0.000925595	0.00082107	0.000511795	0.00741676	0.00445397	0.00518341	0.00722206	0.00348162	0.00416473	0.0120152	0.0101517	0.00968712	0.00683711	0.00348006	0.00325637	0.00911389	0.00539603	0.00579933	0.00783483	0.00239178	0.00257912
543	0.00118832	0.00169056	0.00142797	0.000997187	0.000579269	0.0005172	0.00729215	0.00435983	0.00518906	0.00712725	0.00316953	0.00425654	0.0119958	0.010213	0.00964599	0.00672569	0.00372756	0.00359742	0.00915954	0.00540056	0.00581431	0.00772644	0.00246733	0.00261921
542	0.00113813	0.00138639	0.00143415	0.000919339	0.000633616	0.00055355	0.00733876	0.00438571	0.0053048	0.00717332	0.00307786	0.00406681	0.0118762	0.0104805	0.00953083	0.00698323	0.00361492	0.00367004	0.00933666	0.00542317	0.00587814	0.00800756	0.00248514	0.00257507
541	0.00109925	0.00137012	0.00146943	0.00083171	0.000699902	0.000641219	0.00739678	0.00438659	0.00530735	0.00739362	0.0036937	0.00431546	0.0121404	0.0103534	0.00959351	0.00697222	0.00388151	0.00382479	0.00921134	0.00573803	0.00591824	0.00821188	0.00250639	0.00251827
540	0.00123095	0.00143129	0.00167173	0.000841768	0.000781512	0.000556461	0.00746169	0.00443877	0.00548615	0.0073656	0.00365209	0.00422241	0.0123361	0.0102104	0.00961955	0.00699044	0.00397698	0.00387381	0.00896401	0.00541896	0.0060441	0.00801133	0.00271	0.00249143
539	0.00122376	0.00147632	0.00180187	0.000950264	0.00101755	0.000843997	0.00756309	0.00457151	0.00570592	0.00746883	0.00380037	0.00424828	0.0124506	0.0104467	0.00967569	0.00710759	0.00398994	0.00373941	0.00923222	0.00551504	0.00595802	0.00802492	0.00285556	0.00282372
538	0.0012668	0.00168385	0.00188936	0.000943414	0.000946812	0.000875358	0.00758775	0.00454989	0.00571792	0.00782465	0.00392657	0.004429	0.012668	0.0108918	0.00976532	0.00715366	0.00409198	0.00372045	0.00933843	0.00564621	0.00606786	0.00813718	0.00282618	0.00324593
537	0.00131472	0.00183388	0.00210663	0.000992198	0.00106091	0.000973183	0.00775415	0.00490299	0.00591159	0.00782135	0.00386467	0.00454653	0.0128423	0.0109104	0.00982264	0.00710711	0.00406073	0.00418688	0.00934467	0.00588933	0.00639183	0.00832944	0.00272777	0.00293001
536	0.00140094	0.0019734	0.00205864	0.000985784	0.000926082	0.000825644	0.0076936	0.00495818	0.00585013	0.00789542	0.00426739	0.00469902	0.0130033	0.0111062	0.0101371	0.0073774	0.00433296	0.00424072	0.00953635	0.00588128	0.00657093	0.00858734	0.0029015	0.00307778
535	0.00138189	0.0018138	0.00198504	0.000993069	0.00110308	0.00102474	0.00782068	0.00502186	0.00581563	0.00795277	0.00433149	0.00484349	0.0127312	0.0110994	0.0104368	0.00763074	0.00436433	0.00427517	0.00958827	0.00599639	0.00677816	0.00861102	0.00291724	0.00301923
534	0.0013022	0.00185704	0.00203405	0.00120262	0.0012903	0.00116361	0.00769535	0.00508634	0.00562239	0.00826385	0.00473699	0.00534307	0.0130141	0.0113497	0.0107153	0.00749123	0.0047146	0.00448082	0.00976375	0.00598202	0.00673248	0.00868388	0.00277403	0.00310546
533	0.00138882	0.00194032	0.00204759	0.00117644	0.00117406	0.00118517	0.00759628	0.00522652	0.00572996	0.00830186	0.00486384	0.00537714	0.0131772	0.0112109	0.0108085	0.00750902	0.00493074	0.0046612	0.00992137	0.00604864	0.00680397	0.00878329	0.00273129	0.0030667
532	0.00152335	0.00194584	0.00215824	0.00102651	0.00119028	0.0011266	0.00777466	0.00496773	0.00593255	0.00843978	0.00489667	0.00551582	0.013418	0.0114363	0.0109156	0.00756553	0.00502049	0.00514374	0.0100026	0.0060802	0.006841	0.00890307	0.00281379	0.00303409
531	0.00146283	0.00217107	0.00222364	0.00112012	0.00135623	0.00107879	0.00781464	0.00487677	0.00605507	0.00826405	0.00484511	0.00560799	0.0134493	0.0114946	0.0108467	0.00745016	0.00501424	0.00522711	0.00993113	0.00606699	0.00697017	0.00874894	0.0027245	0.00287911
530	0.00148611	0.00211886	0.00215159	0.00107482	0.00147371	0.00112458	0.00789344	0.00526011	0.00629865	0.00862356	0.00495735	0.00587478	0.0135815	0.0118331	0.010989	0.00765162	0.00507042	0.00526126	0.00989285	0.00611229	0.00693462	0.00869586	0.00303709	0.0030362
529	0.00158829	0.00220855	0.00243527	0.00102728	0.00143736	0.00111894	0.00787591	0.00516275	0.00601294	0.00876141	0.00491948	0.00571313	0.0136095	0.0122628	0.0111149	0.00780693	0.00535727	0.00547398	0.00994398	0.00636583	0.00684135	0.00887521	0.00297062	0.00331084
528	0.00150512	0.00264565	0.00264767	0.00116417	0.00162998	0.00138605	0.00796669	0.0054038	0.00612967	0.00885511	0.00527852	0.00590491	0.0138421	0.012505	0.0115049	0.00802522	0.00556224	0.00580754	0.0100813	0.00643447	0.00710066	0.00911296	0.00270169	0.00315761
527	0.00153264	0.00265188	0.00270926	0.00114639	0.00166313	0.00153626	0.00807776	0.00578444	0.00647059	0.00903378	0.0054482	0.00629073	0.0140779	0.0128867	0.0117622	0.00809505	0.00553575	0.00567158	0.0101709	0.00665897	0.00715534	0.00895671	0.00285077	0.00301114
526	0.00151211	0.00250832	0.00274787	0.00109311	0.00173221	0.00158621	0.00812397	0.00576856	0.00664893	0.00904878	0.00553995	0.00627497	0.0140619	0.0128074	0.0118707	0.00813993	0.00570317	0.00586193	0.010139	0.00682876	0.00746418	0.00903881	0.00326896	0.00321526
525	0.0014854	0.00264327	0.00267416	0.00117367	0.00175781	0.00173779	0.00808101	0.0057338	0.00688056	0.00901045	0.0054033	0.00633148	0.0139428	0.0126319	0.0118305	0.00806188	0.00606537	0.00599308	0.0102057	0.00715647	0.00752324	0.00899719	0.00362243	0.0034535
524	0.00156941	0.00290669	0.00273706	0.00121042	0.00183686	0.00157332	0.00805834	0.00591339	0.00669124	0.00892442	0.00542696	0.00625043	0.0138579	0.0126379	0.0120273	0.00815985	0.00638351	0.00628592	0.0102176	0.00704439	0.00750637	0.00889824	0.00340256	0.00353745
523	0.00159164	0.00293235	0.00305209	0.00123079	0.00171148	0.00145239	0.00827282	0.00628217	0.00680159	0.00889034	0.00572009	0.00659666	0.0140562	0.0125148	0.0121299	0.00808816	0.00672824	0.00620508	0.0101772	0.00711214	0.00743526	0.00911799	0.00329993	0.00341599
522	0.0016072	0.00306213	0.00311202	0.00128595	0.00178946	0.00175216	0.00824653	0.0063534	0.0070763	0.00897126	0.005997	0.00675608	0.0140601	0.0129737	0.0124962	0.00804325	0.00682833	0.00618608	0.0102372	0.0071539	0.00739582	0.00909565	0.0035143	0.00338096
521	0.00165803	0.00310098	0.00307508	0.00108998	0.00219965	0.00193789	0.00843032	0.00650026	0.00710147	0.00900264	0.00623191	0.00698369	0.0142068	0.0131274	0.0125929	0.00827628	0.00690425	0.00653225	0.0104188	0.00675326	0.00702257	0.00908658	0.0034896	0.00335714
520	0.00164051	0.00323961	0.00332585	0.00109982	0.00220429	0.001851	0.00872128	0.00692257	0.00734446	0.00898446	0.00617145	0.00696373	0.0141684	0.0129934	0.0125708	0.00841414	0.00706681	0.00704827	0.0105777	0.00691779	0.00749542	0.00914548	0.00381954	0.00352642
519	0.00177019	0.00333262	0.00328742	0.00119703	0.0020751	0.00173541	0.00873082	0.00672316	0.00744494	0.00925188	0.00632916	0.00726156	0.0143621	0.0132218	0.0129315	0.0083477	0.00720137	0.00733578	0.0106356	0.00738669	0.00779308	0.00921414	0.00365462	0.0035992
518	0.00178723	0.00370509	0.00354894	0.00120254	0.00227105	0.00186899	0.00857495	0.00677162	0.0073205	0.0092004	0.00683112	0.0074524	0.0145538	0.0136598	0.0129376	0.00847654	0.00723804	0.00716011	0.0105732	0.00718009	0.00771774	0.00931169	0.00362106	0.00344157
517	0.00180847	0.00368246	0.00343282	0.0012894	0.00226499	0.0021102	0.00857635	0.00685175	0.00749846	0.00933121	0.00710778	0.00770721	0.0145943	0.0138811	0.0128503	0.00846041	0.00711422	0.00705369	0.0105581	0.00741809	0.00792866	0.00936219	0.00359994	0.00343553
516	0.0017666	0.0037993	0.00363168	0.00117048	0.00234945	0.0021535	0.00871623	0.00720589	0.00778233	0.00934979	0.00699305	0.0079558	0.0146695	0.0137244	0.0130192	0.00837286	0.00714496	0.00709228	0.0106249	0.00787707	0.00804254	0.0094507	0.00361372	0.00369426
515	0.00177593	0.00367403	0.00363364	0.00109509	0.0025802	0.00218528	0.00886913	0.00736409	0.00805136	0.00936394	0.00701554	0.00769385	0.014621	0.0138378	0.012913	0.00841014	0.00725226	0.00730061	0.0105382	0.00754494	0.00807695	0.009455	0.00366284	0.00394093
514	0.00180816	0.00356456	0.00371685	0.00112471	0.00247014	0.00202039	0.00863036	0.00727637	0.00798449	0.00947202	0.00728823	0.00801114	0.0146501	0.0139154	0.0130736	0.00847916	0.00725926	0.00722986	0.010528	0.0079235	0.00825493	0.00952472	0.0038111	0.00397997
513	0.00168004	0.00369868	0.00394826	0.00101429	0.00244139	0.00210123	0.0085024	0.00686774	0.00778066	0.00968982	0.00740025	0.00826202	0.0148521	0.0141517	0.0134818	0.00859714	0.00739988	0.00749966	0.0106401	0.00777172	0.00805498	0.00953148	0.00385858	0.00380435
512	0.00184871	0.00385465	0.00388851	0.00123552	0.00234096	0.00211145	0.00856194	0.00679033	0.0079403	0.00975885	0.0072395	0.00818141	0.0147277	0.0145537	0.0137416	0.00867812	0.00762082	0.00753933	0.0107544	0.00787059	0.00806671	0.00949338	0.00339124	0.00383879
511	0.00187595	0.00394452	0.00394499	0.00131662	0.00237849	0.00225834	0.00860439	0.00717641	0.00816298	0.00966009	0.00758491	0.00839412	0.0145521	0.0144048	0.0138175	0.0087226	0.00753688	0.00755132	0.0107156	0.00808366	0.00821047	0.00952395	0.00342032	0.00353989
510	0.00194453	0.00410423	0.00410756	0.00122212	0.00302389	0.0025391	0.00888628	0.00751421	0.00864404	0.00954741	0.00797986	0.00869148	0.0148894	0.014709	0.0141719	0.00864917	0.00785777	0.00761866	0.0109634	0.00775645	0.00851423	0.00960923	0.00402177	0.00390494
509	0.00200814	0.00418596	0.00418311	0.00130919	0.00283982	0.00258876	0.0086657	0.00740154	0.00842095	0.00984579	0.00801122	0.00907019	0.015001	0.0150275	0.0142492	0.00867903	0.00802255	0.00756185	0.0108454	0.00786577	0.00853982	0.00966953	0.00373332	0.00384195
508	0.00190472	0.0041189	0.00420723	0.00127021	0.0029522	0.00288538	0.00851149	0.00733409	0.00836538	0.00988017	0.00831774	0.00928779	0.0148899	0.0154023	0.0144642	0.00851792	0.00793517	0.0076563	0.0108201	0.00803027	0.00851619	0.00961069	0.0037784	0.00360628
507	0.00187067	0.00428456	0.00437704	0.00124352	0.0028163	0.00261851	0.00869863	0.00735055	0.00851281	0.00984435	0.00821409	0.00914513	0.0147104	0.0152887	0.0143426	0.00856251	0.00773641	0.00772673	0.0109866	0.00792646	0.00870674	0.00983184	0.00367711	0.00337015
506	0.00187451	0.00443317	0.00449655	0.00123392	0.00286709	0.00268848	0.00862472	0.00744729	0.00868071	0.0100168	0.0084869	0.00942441	0.0149277	0.0153914	0.0144993	0.0085654	0.00782578	0.00809897	0.0106958	0.00804773	0.00887032	0.00955694	0.00373086	0.00399114
505	0.00197956	0.00448942	0.00447023	0.00122711	0.00318307	0.00283103	0.00892181	0.00802994	0.00887283	0.00999801	0.00862531	0.00928805	0.0150006	0.0153452	0.0145153	0.00865925	0.00808823	0.00848497	0.0107674	0.00831881	0.00889945	0.00943797	0.00402986	0.00455445
504	0.0020556	0.00467069	0.00474114	0.00129339	0.00313787	0.00283186	0.00895701	0.0081479	0.00873307	0.00990983	0.00869981	0.00944797	0.0150078	0.0154171	0.0146049	0.0087542	0.00836827	0.00820683	0.0108318	0.00839184	0.00877804	0.00960496	0.00411805	0.00415393
503	0.00204119	0.00457762	0.00479929	0.00126683	0.00335057	0.00283608	0.00899373	0.00834863	0.00898286	0.00982346	0.00869593	0.00966367	0.0150884	0.0156038	0.0149897	0.00869178	0.00834034	0.00796511	0.0107652	0.00846425	0.00894122	0.00957676	0.00403012	0.00390865
502	0.00193596	0.00484579	0.0048809	0.00128866	0.00327223	0.00281553	0.0088784	0.00830711	0.00909725	0.00983301	0.0086678	0.0100901	0.0149553	0.015745	0.0152302	0.00863163	0.008239	0.0082438	0.0106553	0.00830261	0.00883108	0.00953091	0.00437548	0.00415756
501	0.00193764	0.00493827	0.00493079	0.00134974	0.00327062	0.00281808	0.0085712	0.00815284	0.00898022	0.00993102	0.00896769	0.00996944	0.0148827	0.0160313	0.0154602	0.0085694	0.00826691	0.00825271	0.0105903	0.0082965	0.00901753	0.00947701	0.00425371	0.00416966
500	0.00198575	0.00495966	0.00477695	0.00130951	0.00335372	0.00292019	0.0087932	0.0083528	0.00910018	0.00976429	0.00917494	0.0100016	0.0149159	0.0160382	0.0155023	0.00853905	0.00848305	0.00819385	0.0106328	0.0085702	0.00933414	0.00950575	0.00433314	0.00433213
499	0.00198441	0.00509282	0.00504673	0.00135556	0.00331743	0.00283762	0.00895088	0.00862788	0.00930993	0.00976115	0.00938776	0.0101402	0.0149467	0.0162194	0.0157523	0.00851026	0.00875963	0.00825663	0.0104302	0.00885686	0.00923063	0.00947128	0.00417306	0.00422753
498	0.00199763	0.00526412	0.00527493	0.00139009	0.00335057	0.0030644	0.00875566	0.00821853	0.00927673	0.00988627	0.00953134	0.01032	0.0148688	0.0164903	0.0158954	0.00838361	0.00838811	0.00806954	0.010611	0.00907933	0.00910236	0.00956915	0.00399407	0.00414119
497	0.00202806	0.00538267	0.00525687	0.00119761	0.00352745	0.00295143	0.00895336	0.00870603	0.00948709	0.0101261	0.00960331	0.0104072	0.0149555	0.0168165	0.0159442	0.00849225	0.00858544	0.00827894	0.0106414	0.0088406	0.0090118	0.00949965	0.00387511	0.0039923
496	0.00200555	0.00539877	0.00526543	0.00124982	0.00357509	0.00302454	0.00883172	0.00881284	0.00937134	0.0100221	0.0100747	0.0108915	0.0151202	0.0166666	0.0159374	0.00848696	0.00870707	0.00851057	0.0105789	0.00854928	0.00917766	0.00945748	0.00405198	0.00395564
495	0.00199227	0.00531686	0.00548389	0.00140544	0.00367065	0.0032743	0.00869524	0.00873183	0.00937496	0.00998955	0.0101897	0.011034	0.0149946	0.016814	0.0161964	0.00847906	0.00872049	0.00848469	0.0106297	0.00881086	0.00940156	0.00960219	0.00440396	0.00399134
494	0.00193598	0.00558248	0.00549986	0.00141037	0.00354699	0.00324247	0.00881566	0.00888553	0.00969446	0.00993409	0.0102832	0.0111155	0.014938	0.0167638	0.0160123	0.00849609	0.00871441	0.00855931	0.0107046	0.00897825	0.00935475	0.00950998	0.00419654	0.00420611
493	0.00176419	0.00557025	0.00554578	0.001342	0.00350886	0.00318652	0.0086109	0.00864206	0.00954546	0.00962745	0.0103097	0.0110192	0.0148976	0.0167698	0.015777	0.00851955	0.0086838	0.0085163	0.0106155	0.00882227	0.00943537	0.00934498	0.00404847	0.00427839
492	0.00186001	0.00554186	0.00572058	0.00138681	0.00368966	0.00330614	0.00864528	0.0088313	0.00962587	0.00961136	0.0105246	0.0109223	0.0146022	0.0168023	0.0159149	0.00873392	0.00892854	0.00881844	0.0106754	0.00906996	0.00919096	0.00950761	0.00427307	0.00409114
491	0.00197585	0.00555445	0.00572937	0.00139564	0.00368758	0.00335437	0.00852206	0.00906985	0.00973707	0.00959637	0.0104412	0.0107393	0.0145166	0.0169875	0.0160344	0.00855908	0.009174	0.0091868	0.0105577	0.00901286	0.00919426	0.00944608	0.00426598	0.00441352
490	0.00213044	0.00548525	0.0055807	0.00131226	0.00376818	0.00340783	0.00858784	0.00918654	0.0100398	0.00950367	0.0102225	0.0109306	0.0147989	0.0170898	0.0160036	0.00826385	0.00906174	0.00879994	0.0104548	0.00902247	0.00950267	0.00929787	0.00419078	0.00451116
489	0.00208334	0.00548757	0.00570027	0.00126391	0.0040009	0.00360259	0.00877491	0.0094622	0.0100921	0.00960255	0.0102945	0.0111765	0.014944	0.0169104	0.0160209	0.0083439	0.00883852	0.00886842	0.0105125	0.00915122	0.00971982	0.00952474	0.00421262	0.00418037
488	0.00208152	0.00567265	0.0057637	0.00133303	0.00366008	0.00348546	0.00874572	0.00921306	0.0098581	0.00960248	0.010722	0.0114873	0.0148112	0.0170243	0.0163253	0.00815894	0.00876182	0.00871552	0.010255	0.00947825	0.0101267	0.00907423	0.00414382	0.00408377
487	0.00202608	0.00592823	0.00589942	0.00137342	0.00379313	0.00341929	0.0087661	0.0093778	0.00971898	0.009624	0.010958	0.0117076	0.0146811	0.0172844	0.0164544	0.00819632	0.00891345	0.00857115	0.0101594	0.00941391	0.00991991	0.00895536	0.00445953	0.00421529
486	0.00193521	0.00585309	0.00603936	0.00142842	0.00398462	0.00361084	0.00869976	0.00952049	0.00991397	0.00960858	0.0107827	0.0116688	0.0147585	0.0175423	0.0165585	0.00864977	0.00881646	0.00862726	0.0103835	0.00922081	0.00959941	0.00930633	0.00422299	0.00419822
485	0.00194356	0.0056907	0.00584068	0.00139946	0.00382942	0.00357651	0.00844328	0.00950782	0.0100985	0.00951957	0.010629	0.0116839	0.0147002	0.0173864	0.0166139	0.00826927	0.0089315	0.0089423	0.0104161	0.00921386	0.00934426	0.00920943	0.00429166	0.00445297
484	0.0018782	0.00582678	0.00587982	0.00132828	0.0038413	0.0034788	0.00833867	0.00912616	0.00987759	0.00958856	0.0108502	0.0118747	0.0144764	0.0174742	0.0165366	0.00819802	0.00901649	0.00877739	0.0102916	0.00914418	0.00926708	0.00918686	0.00441162	0.00468669
483	0.00190848	0.00580973	0.00596012	0.00123543	0.0039715	0.00356303	0.00844483	0.0093877	0.0100988	0.00960562	0.0112607	0.0120756	0.0146082	0.0175784	0.0168596	0.00835961	0.00912624	0.00870274	0.0103534	0.00894506	0.00944176	0.00921442	0.00423814	0.00454991
482	0.00189521	0.00580195	0.00590613	0.00117237	0.0041065	0.00363626	0.00856443	0.0097013	0.0103342	0.00940449	0.0111732	0.0120021	0.0146361	0.0174817	0.0167515	0.00809144	0.00905849	0.00939989	0.0100488	0.00875582	0.00940687	0.00886678	0.00429851	0.00430018
481	0.00189264	0.00599511	0.00598216	0.00146	0.00403261	0.00389291	0.00862634	0.00941586	0.0102653	0.00935439	0.0109757	0.0118825	0.014536	0.0172642	0.0166673	0.00794984	0.00920059	0.00919499	0.00998664	0.00874527	0.00922094	0.00893805	0.00431318	0.00443483
480	0.00197037	0.00589105	0.00572634	0.00143945	0.00422613	0.00393111	0.00831665	0.00920694	0.0100113	0.00920996	0.011178	0.011546	0.0142647	0.0174745	0.0167897	0.0078599	0.00893139	0.00883799	0.0100041	0.00896771	0.00936821	0.00897252	0.00447074	0.00436419
479	0.00198557	0.00595674	0.00606953	0.00145675	0.0043031	0.00400493	0.0083121	0.00937232	0.0101066	0.00893729	0.0112224	0.0114987	0.0140495	0.0177956	0.016814	0.00785932	0.00871806	0.00896806	0.00984134	0.00902893	0.00956365	0.00873153	0.00468335	0.00448485
478	0.00186358	0.00589859	0.00616379	0.00151793	0.00414178	0.00385793	0.00828719	0.00961321	0.010144	0.00874521	0.0113038	0.011743	0.0139915	0.0177101	0.0168741	0.00789597	0.00879671	0.00880601	0.00987751	0.00915356	0.00950966	0.00874927	0.00443506	0.00387835
477	0.00189389	0.00577243	0.00597782	0.00133792	0.00404455	0.00375612	0.00821584	0.0093926	0.0102353	0.0087148	0.0111698	0.0115879	0.0138581	0.0173404	0.0169167	0.0079249	0.00872737	0.00875327	0.00994869	0.00891728	0.00937188	0.00880186	0.00435985	0.00370032
476	0.00194131	0.00593862	0.00602041	0.00131955	0.00404645	0.0037373	0.00827291	0.0095036	0.0101678	0.00880665	0.0109861	0.0115147	0.0139903	0.0173892	0.0167404	0.00770307	0.00859241	0.00870351	0.00984481	0.00913776	0.00955196	0.00871094	0.00459066	0.00415166
475	0.00190161	0.0060703	0.00608741	0.00141482	0.0042323	0.00369263	0.00848761	0.00947937	0.0103581	0.00899666	0.0110413	0.0116553	0.0141208	0.0173048	0.0166319	0.00762883	0.00870808	0.00866518	0.00981172	0.00906401	0.00942061	0.00861654	0.00450528	0.00449061
474	0.00185338	0.00597877	0.00597658	0.00142302	0.00430679	0.00363395	0.00853392	0.00944945	0.0103564	0.00878941	0.0110806	0.0117792	0.0138049	0.0172852	0.0164866	0.00768925	0.00856242	0.00841912	0.00981997	0.0087892	0.0094296	0.00854966	0.00466784	0.00451448
473	0.00186148	0.00617508	0.00596879	0.00151292	0.00398438	0.00363294	0.00858593	0.00963108	0.0104685	0.00856283	0.0109217	0.011628	0.0134629	0.0173504	0.0163392	0.00760798	0.00838192	0.00840342	0.00966116	0.00886218	0.00960275	0.00866966	0.00460709	0.00443977
472	0.00194103	0.0061057	0.00608836	0.00160623	0.00392689	0.00356879	0.0084515	0.00964687	0.0104045	0.00865093	0.0110361	0.0118911	0.0138011	0.0171922	0.0164648	0.00763197	0.00846497	0.00866887	0.00980771	0.00897478	0.0095513	0.00865737	0.00438267	0.00461105
471	0.0019611	0.00583925	0.00607654	0.00144824	0.00415699	0.00363609	0.00836165	0.00964806	0.0104562	0.00880801	0.0112952	0.0120505	0.0138873	0.0173782	0.0164043	0.00771743	0.00825384	0.00893474	0.00950326	0.00903853	0.00938803	0.00828303	0.00440814	0.00481844
470	0.00185699	0.00591356	0.00605409	0.00145994	0.00419102	0.00367054	0.00811445	0.0091792	0.00982974	0.00874842	0.0109388	0.0118968	0.0136276	0.0173025	0.0164599	0.00749331	0.00821134	0.00839094	0.0093547	0.0089987	0.0093066	0.00828305	0.0044159	0.00449104
469	0.00187333	0.00590055	0.0058506	0.00150813	0.00414541	0.0037825	0.00817851	0.00906435	0.00996073	0.00853639	0.0108091	0.0118406	0.0135815	0.0172854	0.016627	0.00767512	0.00837836	0.00811186	0.00947706	0.00888629	0.00923849	0.00844639	0.00448523	0.00460319
468	0.00190117	0.005819	0.00588932	0.00156674	0.00408037	0.00385627	0.00820904	0.00935307	0.0102996	0.00834793	0.0109262	0.0118764	0.013509	0.0172697	0.0163302	0.00753746	0.00831925	0.00838785	0.0095025	0.00882368	0.00921972	0.00837555	0.00453899	0.00472324
467	0.00187783	0.00574719	0.00596309	0.00162459	0.00396104	0.00377264	0.00810098	0.00973251	0.0105107	0.00833789	0.011019	0.011674	0.0135184	0.0173191	0.0164081	0.0073971	0.00827726	0.00801996	0.0093089	0.00887127	0.00930954	0.00809685	0.00480963	0.00463239
466	0.00189047	0.00571731	0.00595276	0.00147206	0.00396484	0.00384189	0.00789332	0.00935553	0.0101611	0.00837399	0.0111056	0.0116973	0.0134097	0.0173058	0.0164324	0.00741328	0.00828329	0.00786976	0.00932244	0.00897851	0.00916991	0.00795083	0.00469768	0.00452217
465	0.00175631	0.00570294	0.00581288	0.00152197	0.00389755	0.003749	0.00800888	0.00937852	0.0102706	0.0083062	0.0108058	0.0119969	0.0132224	0.0170637	0.0163784	0.00748968	0.00828832	0.00823862	0.00939807	0.00913565	0.00914885	0.00809829	0.00457096	0.00458266
464	0.001724	0.00572545	0.0059091	0.00155727	0.00393544	0.00364701	0.00810831	0.00961808	0.010479	0.00815211	0.0107266	0.0118704	0.0129623	0.0169426	0.0163306	0.00722822	0.00803179	0.00813092	0.00936121	0.00878823	0.00940605	0.00805798	0.00447213	0.00452873
463	0.00171548	0.00580831	0.00591754	0.00148877	0.00410211	0.00383506	0.00825979	0.00948388	0.0106425	0.00818545	0.0108935	0.0118364	0.0131411	0.0175368	0.0162791	0.00704815	0.0080166	0.00805295	0.00902037	0.00880693	0.00932133	0.00782697	0.00448836	0.00425018
462	0.00170349	0.00582571	0.00588546	0.00152488	0.00410959	0.00371425	0.00811118	0.00958033	0.0104745	0.00821107	0.0110303	0.0119936	0.0130832	0.0175462	0.0164097	0.00708618	0.00775853	0.00782713	0.00895423	0.00865957	0.00904472	0.00774496	0.00445502	0.00432821
461	0.00173318	0.0058563	0.00583628	0.00159497	0.00414659	0.00376931	0.00812403	0.00941255	0.0103035	0.00798629	0.0109177	0.0116157	0.0127414	0.0171212	0.0163014	0.00692922	0.00764762	0.00771153	0.00900838	0.00879107	0.00882715	0.00770262	0.00440406	0.00430035
460	0.00177991	0.00558896	0.00585036	0.00162251	0.00417956	0.00375054	0.00802306	0.00903176	0.0103742	0.00804826	0.0108479	0.0113839	0.0128325	0.0171443	0.0161481	0.00668982	0.00727894	0.00743931	0.00877422	0.00879965	0.00877335	0.00783703	0.00450655	0.00392768
459	0.00184271	0.00545027	0.00587156	0.00158402	0.0041065	0.00377347	0.0078227	0.00883941	0.0103568	0.00812837	0.0107744	0.0114419	0.0131332	0.0173341	0.0162106	0.00671395	0.00720712	0.00716245	0.00882041	0.00880809	0.00886029	0.00780834	0.00450204	0.00381299
458	0.00180921	0.0054571	0.00575556	0.00151641	0.00409813	0.00375226	0.00787348	0.00907443	0.0101641	0.00798386	0.0105927	0.0111103	0.0129982	0.0171636	0.0163949	0.00660892	0.00741599	0.00717347	0.00877414	0.00892458	0.00896398	0.00754134	0.00419781	0.00413461
457	0.00169814	0.0056278	0.00569278	0.00155567	0.00384688	0.00361512	0.00786261	0.00925307	0.0101432	0.00808222	0.0109393	0.0110072	0.0129017	0.0170926	0.0165438	0.00670914	0.00772615	0.00738207	0.00886733	0.00876034	0.00891127	0.00768579	0.00416744	0.0041365
456	0.00160283	0.00562269	0.00573281	0.00147388	0.00366448	0.00357782	0.00789904	0.0092324	0.010336	0.00807693	0.0107695	0.0112953	0.0129312	0.0172943	0.0163114	0.006567	0.0074928	0.00734164	0.00861912	0.00848922	0.00857754	0.00731615	0.00402303	0.00411052
455	0.00170483	0.00566706	0.00585802	0.00141607	0.00414618	0.0039096	0.00789065	0.00917332	0.0101385	0.00776155	0.0105771	0.0111995	0.0129643	0.0169885	0.0164423	0.00653588	0.00739734	0.00710607	0.00857207	0.0084378	0.00873835	0.00744167	0.00396075	0.00414648
454	0.00167555	0.00561212	0.00561058	0.00147441	0.00400434	0.00371116	0.00786948	0.00915756	0.0101435	0.00772564	0.0105619	0.0110907	0.012844	0.0168418	0.0161148	0.00668926	0.00745595	0.00681922	0.008615	0.0083981	0.00895078	0.00758242	0.00444941	0.00422923
453	0.00158834	0.00567989	0.00554964	0.00152256	0.00414071	0.0038429	0.00799249	0.00901521	0.0100386	0.00784481	0.0105506	0.0114571	0.0131101	0.0170861	0.0162557	0.0066418	0.00698598	0.00700647	0.00867574	0.00829436	0.00908207	0.00758824	0.00462459	0.00418072
452	0.00161413	0.00558563	0.00564307	0.0016688	0.00380952	0.00371294	0.00802234	0.00912012	0.010171	0.00773487	0.0103631	0.0111255	0.0131316	0.0171271	0.0165134	0.00641162	0.00666085	0.00689445	0.0087621	0.00851278	0.00879659	0.00760303	0.00446134	0.00442944
451	0.00165848	0.00538267	0.00565982	0.00166314	0.00396241	0.00368806	0.00789589	0.0091394	0.0101751	0.00757985	0.0100586	0.0110726	0.0129988	0.0169153	0.0163828	0.00642655	0.00647219	0.00680498	0.00857399	0.00871368	0.00899248	0.00745749	0.00442865	0.00435191
450	0.00165022	0.00529002	0.00546933	0.00159497	0.00372061	0.00334867	0.00797118	0.00926352	0.0102136	0.00732852	0.0103	0.0108353	0.0125165	0.0165647	0.0156867	0.00653756	0.00688097	0.00699798	0.00855322	0.0083628	0.00907731	0.0074068	0.00472116	0.00478174
449	0.00169844	0.00523478	0.00511189	0.00158299	0.00355139	0.00336577	0.00785588	0.00909239	0.0100716	0.0071825	0.0100419	0.0109189	0.0124451	0.0165007	0.0155245	0.00635553	0.00659844	0.00707367	0.00839466	0.00816652	0.00882362	0.0072301	0.00456236	0.00462479
448	0.00151094	0.00510292	0.00508647	0.00166729	0.00357158	0.00351682	0.00789452	0.00943434	0.010087	0.00694908	0.00982985	0.0106671	0.0125582	0.0160808	0.0155183	0.00630735	0.00638919	0.00690558	0.00832806	0.00839802	0.00864303	0.00723014	0.00444315	0.00468864
447	0.00152352	0.00514372	0.00519023	0.00170517	0.00352715	0.00327555	0.00781691	0.00907664	0.00992753	0.00715536	0.00989993	0.0107001	0.0124934	0.0162243	0.0154031	0.00628568	0.0063092	0.00678627	0.00825722	0.00849688	0.00864525	0.00713843	0.00428586	0.00437472
446	0.00166632	0.00491404	0.0052188	0.00165719	0.00340581	0.00308044	0.00774285	0.00876172	0.00986872	0.00708683	0.00986735	0.0103315	0.0122516	0.0160925	0.0154079	0.00619324	0.00656778	0.00650796	0.00826512	0.00817497	0.00882025	0.00699806	0.00426357	0.00439216
445	0.00170817	0.00497314	0.00528449	0.00164971	0.00341703	0.00314963	0.00775581	0.00870182	0.00991186	0.00699255	0.0098069	0.0101533	0.0121517	0.0161255	0.0153113	0.00597568	0.0065439	0.0062405	0.00810283	0.00798833	0.00870025	0.00682073	0.00446256	0.00471387
444	0.00170028	0.00491107	0.00515246	0.00174185	0.00344857	0.00344329	0.00790009	0.00891806	0.0100597	0.00713642	0.0097256	0.0103426	0.0122776	0.0162033	0.0157012	0.00603099	0.00667653	0.00631813	0.00815729	0.00824506	0.00822795	0.00687598	0.0046533	0.00468455
443	0.00162764	0.00485072	0.00514212	0.00172463	0.0034257	0.00339452	0.00806099	0.00887791	0.0100125	0.00707284	0.00934625	0.010524	0.0121565	0.0159034	0.0151809	0.0057901	0.00640909	0.00585611	0.00812302	0.00815183	0.00839083	0.00688881	0.00443849	0.00442696
442	0.00170984	0.00505035	0.00532268	0.00172721	0.00349567	0.00335782	0.00809744	0.00880568	0.00988522	0.00679196	0.00886185	0.010483	0.0119798	0.0158235	0.0146259	0.00569499	0.00629364	0.00590602	0.00796899	0.00822938	0.00878051	0.00696442	0.00421234	0.00430524
441	0.00174169	0.00514378	0.00511349	0.00189209	0.0036539	0.00338365	0.00818038	0.00899383	0.00976612	0.00675879	0.00863842	0.0100943	0.0118392	0.0154852	0.014439	0.00590319	0.00613612	0.00605315	0.00805078	0.00823617	0.00897963	0.00700269	0.00457274	0.00460018
440	0.00172093	0.00499512	0.00508641	0.00190545	0.00361387	0.00343135	0.00819153	0.00883591	0.0100131	0.00677758	0.00886426	0.0098225	0.0120095	0.0151321	0.0145778	0.00559863	0.00596158	0.00644275	0.00794986	0.0083323	0.00889056	0.00666335	0.00461921	0.00462444
439	0.00164187	0.00483427	0.00525355	0.00196948	0.00336007	0.00321758	0.00791986	0.00864628	0.00966786	0.00670787	0.00902129	0.00959517	0.0120223	0.0151724	0.0147408	0.00555559	0.0059322	0.0061816	0.00801611	0.00814587	0.00873021	0.00670619	0.00449047	0.00416225
438	0.00179325	0.00472231	0.00521506	0.00206351	0.00369002	0.00354598	0.00780804	0.00854543	0.00940994	0.00695694	0.00914033	0.0096452	0.0119183	0.0149445	0.014823	0.00575946	0.00589343	0.00602992	0.00811964	0.00788112	0.00816991	0.00692324	0.00466664	0.00446161
437	0.0018368	0.00473169	0.00499874	0.00212579	0.00340046	0.00334041	0.00775023	0.00850919	0.00938861	0.0069313	0.00888289	0.00993272	0.0117187	0.0148299	0.014502	0.00594946	0.00599534	0.00604855	0.00810728	0.00805019	0.0080076	0.00686171	0.00453794	0.00478004
436	0.00167127	0.00492681	0.00500604	0.00210805	0.00345517	0.00310021	0.00757743	0.00816345	0.00931259	0.00669692	0.00866015	0.00977983	0.0116824	0.0147999	0.0141771	0.0057277	0.00574938	0.005521	0.00793888	0.00808155	0.00799245	0.00672298	0.00437523	0.0045808
435	0.00168767	0.00496173	0.00480243	0.0022138	0.00359659	0.0033789	0.00769824	0.00805835	0.0095127	0.00670714	0.00886606	0.00979632	0.0116462	0.0147982	0.0142782	0.00566539	0.00551466	0.00531034	0.00784938	0.00772932	0.00832869	0.00681171	0.00444304	0.00453558
434	0.00176389	0.00464355	0.00468768	0.0023765	0.0039143	0.00360645	0.00781095	0.00817384	0.00956026	0.00675578	0.0089846	0.0095153	0.0116517	0.0149146	0.0141447	0.00560093	0.00560986	0.00569028	0.00791759	0.00744248	0.00879695	0.00685951	0.00462765	0.00463002
433	0.00192212	0.00448128	0.00476145	0.00232863	0.00386096	0.00346407	0.00773043	0.00842651	0.00934537	0.00653909	0.00882712	0.00903471	0.0113382	0.0151136	0.0135924	0.00525946	0.00571255	0.00591171	0.00781707	0.0072748	0.00823785	0.00650549	0.00458591	0.0046706
432	0.0019982	0.00463583	0.00475474	0.0024139	0.00363157	0.00335033	0.00781771	0.00803807	0.00932085	0.00658108	0.00847375	0.0091185	0.0113978	0.0151812	0.013357	0.00539453	0.00537865	0.00553985	0.00781084	0.00754326	0.0080445	0.00653065	0.00468964	0.00470609
431	0.00186457	0.00448888	0.00451811	0.00246088	0.00365741	0.00333703	0.00780389	0.00797328	0.00927637	0.00660775	0.00852685	0.00938483	0.0117391	0.014868	0.0137889	0.00558273	0.00515419	0.00512081	0.00778814	0.00778812	0.00814925	0.00666697	0.0046406	0.00481238
430	0.00197318	0.00448758	0.00461029	0.00234956	0.00344121	0.00308554	0.00779733	0.00812251	0.00929118	0.00665033	0.00842022	0.00950319	0.0118135	0.0148761	0.0137448	0.00579888	0.00502863	0.00543988	0.0080548	0.00773923	0.00804849	0.00679194	0.00498812	0.00476437
429	0.00204935	0.00427512	0.00446661	0.00247587	0.00353903	0.00317119	0.00768723	0.00812688	0.00932912	0.00663561	0.00829441	0.00959608	0.0115523	0.0145804	0.013622	0.00584289	0.00525304	0.0054301	0.00791351	0.00778482	0.00826064	0.00673244	0.00498584	0.00462471
428	0.00205852	0.00439082	0.00445604	0.0026403	0.0035853	0.00330578	0.00785645	0.0080351	0.00915768	0.00669831	0.00806653	0.00919132	0.0115056	0.0142997	0.0138876	0.00565854	0.00520573	0.00518304	0.00776316	0.00759012	0.00853339	0.00663862	0.00501352	0.00462359
427	0.00208192	0.00417967	0.00434604	0.00276535	0.00345196	0.00336405	0.00779971	0.00797105	0.0091797	0.00659533	0.0078896	0.00923735	0.0113051	0.014081	0.013782	0.00585346	0.00497111	0.00508848	0.00809582	0.0075132	0.00814963	0.00667447	0.00535234	0.00491406
426	0.00217012	0.00409812	0.00421447	0.00281605	0.00326534	0.00330751	0.00789624	0.00801506	0.00909132	0.00636443	0.00776467	0.00881675	0.0112149	0.0142163	0.0133449	0.00553727	0.00515449	0.00513198	0.00767573	0.00754249	0.00802947	0.00656463	0.00535239	0.00505993
425	0.00234048	0.00418715	0.00430737	0.0029432	0.00339856	0.00343711	0.00785804	0.00808661	0.00891483	0.00626881	0.00783739	0.00856891	0.0112907	0.0143272	0.0130892	0.00538716	0.00513779	0.00508511	0.00749719	0.0080562	0.00810354	0.00641053	0.00544624	0.00503611
424	0.00239741	0.00417842	0.00427518	0.00300931	0.00357087	0.00335413	0.0079186	0.00795241	0.00914895	0.00645009	0.00804687	0.0087563	0.0114928	0.0143912	0.0133256	0.00540224	0.00502464	0.00517961	0.00781545	0.00825837	0.00833641	0.00645882	0.00541681	0.00527616
423	0.00243211	0.00427031	0.00442093	0.003181	0.00380501	0.0035069	0.00824813	0.00787224	0.00931455	0.00666077	0.00788394	0.0089065	0.0116663	0.0144035	0.0136272	0.00554727	0.00506119	0.00483133	0.00802595	0.00774932	0.0083342	0.0065714	0.00563274	0.00550338
422	0.00245728	0.00446489	0.00454727	0.00316368	0.00361126	0.00348754	0.00827775	0.00790833	0.00948636	0.006583	0.00767662	0.00881946	0.0117112	0.0144537	0.013651	0.00551471	0.00486442	0.00479041	0.00784713	0.00757923	0.00820918	0.006446	0.00595666	0.00549902
421	0.00249891	0.00441125	0.00455208	0.00320902	0.00360045	0.00347934	0.00802123	0.00769321	0.00909864	0.00668245	0.00767062	0.00873922	0.0117491	0.0146054	0.0136951	0.0052834	0.00467681	0.0045813	0.00749717	0.00766514	0.00852448	0.00629366	0.00601668	0.00558006
420	0.00250933	0.00428628	0.00437781	0.00332581	0.00341638	0.00329444	0.00817598	0.00770121	0.00883467	0.00690724	0.00772178	0.00847979	0.0116653	0.0145125	0.0137466	0.00544358	0.00496452	0.00432013	0.00755472	0.00774249	0.00841729	0.00645159	0.00576971	0.00577167
419	0.00258785	0.00397701	0.00445901	0.00348531	0.00352187	0.00332129	0.00838814	0.00768016	0.00853862	0.00662717	0.00740163	0.00837424	0.0112625	0.0139306	0.0133289	0.00551328	0.00501871	0.00462378	0.00770699	0.00793438	0.00850963	0.00667008	0.00595926	0.0057294
418	0.00264321	0.00397172	0.00444362	0.00346042	0.003737	0.00348807	0.00834586	0.00791125	0.00890501	0.00629313	0.00733115	0.00816644	0.0110787	0.013851	0.0129837	0.0055068	0.00500442	0.00466348	0.00796275	0.007663	0.00834558	0.0066085	0.00635783	0.00581323
417	0.00273753	0.00422297	0.00417688	0.0035907	0.00388751	0.00376901	0.00855145	0.0078331	0.00914724	0.00644152	0.007607	0.00810729	0.0113383	0.0138875	0.0129043	0.00528124	0.00483306	0.00478132	0.00798168	0.00788183	0.00832047	0.00660906	0.00628178	0.00588751
416	0.00276024	0.00420735	0.00427826	0.00388551	0.00375422	0.00354949	0.00873325	0.00777841	0.00937248	0.00645431	0.00728053	0.00807418	0.0113821	0.0138241	0.0129926	0.00532836	0.00458224	0.00479607	0.00792478	0.00806805	0.00853068	0.00659451	0.00632154	0.00630063
415	0.00290411	0.00416927	0.00425552	0.00408467	0.00373041	0.00348837	0.00860197	0.00782848	0.00927822	0.00642659	0.00722167	0.007964	0.0113994	0.0140626	0.0129937	0.00552787	0.00480069	0.00483632	0.00761528	0.00816444	0.0085545	0.00658395	0.00661359	0.00633924
414	0.00293365	0.00424981	0.00411594	0.0040459	0.00387842	0.00367457	0.0084402	0.0077497	0.00897391	0.00660329	0.00730922	0.00818008	0.0115527	0.0139676	0.0132254	0.00531577	0.0049874	0.0046991	0.00760639	0.00800349	0.00852927	0.00643392	0.00662339	0.00633799
413	0.00307027	0.00427369	0.00422344	0.00401088	0.00361435	0.00370344	0.008392	0.0074045	0.00889172	0.00682894	0.00731945	0.00841287	0.0115874	0.0134887	0.0129802	0.00525045	0.00483091	0.00483276	0.00761297	0.00813716	0.00877204	0.00649979	0.00666413	0.00629914
412	0.00302709	0.00420931	0.00423633	0.00421055	0.00361886	0.00371603	0.00874343	0.00790984	0.00926146	0.00675808	0.00726768	0.0082593	0.0114948	0.0134533	0.0131734	0.00533343	0.00452514	0.00464601	0.00758636	0.00811885	0.00872469	0.00659561	0.00656338	0.00656219
411	0.00317664	0.00413809	0.00427529	0.00451262	0.00380976	0.00372571	0.00866986	0.00783845	0.00905328	0.0068525	0.00745492	0.0078714	0.0114987	0.0136272	0.0133871	0.00539314	0.00470939	0.00447128	0.00763009	0.00832405	0.00868667	0.00677891	0.00645105	0.00691208
410	0.00308921	0.0037816	0.00405672	0.00443182	0.00379966	0.00353095	0.00855276	0.00811436	0.00878323	0.00665972	0.00741724	0.00799124	0.0114623	0.013257	0.0123648	0.0054683	0.00420769	0.00381841	0.00759436	0.00832853	0.00847073	0.00678629	0.00702997	0.00667787
409	0.00319369	0.00372992	0.0039975	0.00461817	0.00376201	0.0034089	0.00841938	0.00771143	0.00870305	0.00661618	0.0071691	0.0079662	0.011307	0.0133539	0.0126168	0.00555778	0.00405127	0.00385544	0.00754581	0.00834477	0.00847924	0.00673254	0.00701924	0.00661933
408	0.00332119	0.00405494	0.00413168	0.00454535	0.0036466	0.00332093	0.0089517	0.0078363	0.00901098	0.00636363	0.00667996	0.0075921	0.0111405	0.013542	0.0123906	0.00544596	0.00392544	0.00394861	0.00755707	0.00832166	0.00869544	0.00644873	0.00707127	0.00680506
407	0.00336724	0.00429359	0.00442087	0.00476515	0.00370712	0.00385193	0.00897399	0.00802735	0.00895333	0.00640428	0.00675303	0.00754549	0.0111922	0.0134489	0.0123741	0.0053985	0.00418457	0.00396166	0.00768559	0.00838353	0.00857241	0.0066009	0.00683527	0.00682814
406	0.0034719	0.00426431	0.00454483	0.00501105	0.00374205	0.00392422	0.00899877	0.0077966	0.00891473	0.0065522	0.00696377	0.00776877	0.0114789	0.0136983	0.0125783	0.00517421	0.00449226	0.00411427	0.00751352	0.00832515	0.0085284	0.00663501	0.00720297	0.00695672
405	0.00353631	0.00408624	0.00407661	0.00511925	0.0038928	0.00389897	0.00889147	0.00792487	0.00904621	0.0063865	0.00668157	0.00765282	0.0113777	0.0134423	0.0126639	0.00514581	0.00417422	0.00416917	0.00775009	0.00818879	0.00867762	0.0066993	0.00756398	0.00736031
404	0.00372164	0.00405042	0.00405476	0.00505029	0.00377745	0.0037838	0.00924417	0.00821877	0.00925666	0.00652074	0.00646541	0.00782938	0.0113676	0.0133928	0.0123701	0.00537477	0.00428611	0.00401539	0.00773851	0.00832316	0.0088174	0.00650077	0.00778111	0.00787561
403	0.00369153	0.00406402	0.00398918	0.0052598	0.0039453	0.00398373	0.0090874	0.00805865	0.0089171	0.00668756	0.00686123	0.00792116	0.0115824	0.0137365	0.0121816	0.00523622	0.00433179	0.00393503	0.00768678	0.00867081	0.00898555	0.00649606	0.00814876	0.0079733
402	0.0037176	0.00383	0.00395402	0.00549804	0.0040954	0.00402602	0.00921577	0.00813848	0.00905918	0.00657872	0.00678919	0.00767169	0.0114401	0.0134508	0.0123942	0.00519814	0.00457603	0.0043397	0.00756452	0.00873294	0.0090629	0.00670619	0.00792323	0.00756228
401	0.00383376	0.0039861	0.00396109	0.00540477	0.00375173	0.00381089	0.0090927	0.00790117	0.009226	0.00637215	0.00665111	0.00719423	0.0112845	0.0128199	0.0121599	0.00533847	0.00453762	0.0042085	0.00770555	0.00861379	0.00900455	0.00699537	0.00782972	0.00753623
400	0.00378044	0.00391518	0.00389872	0.00536858	0.00397963	0.00408518	0.00933807	0.00784673	0.00907379	0.00644807	0.0067598	0.00732222	0.0113876	0.012759	0.0121332	0.00549274	0.00416784	0.00395716	0.00794111	0.00841311	0.00895077	0.00701546	0.00794485	0.00768462
399	0.00388419	0.00389552	0.00415995	0.00571715	0.00414178	0.00413258	0.00938961	0.00781992	0.00882139	0.00655681	0.0066676	0.0071847	0.0111876	0.0127021	0.0122507	0.00544115	0.00404326	0.00384043	0.00795236	0.00833823	0.0088238	0.007079	0.00806384	0.00765525
398	0.00403106	0.00399168	0.00409723	0.00577465	0.00420029	0.00402988	0.00959449	0.00815244	0.0090369	0.00673076	0.00670365	0.00727231	0.0112109	0.0129816	0.0119955	0.00531973	0.00400375	0.00375375	0.00777349	0.00856922	0.00917381	0.00700707	0.0082058	0.00791909
397	0.00416772	0.0040582	0.00405755	0.00584458	0.00406457	0.00402655	0.00962387	0.00799567	0.00910876	0.00675553	0.00654929	0.00754429	0.011564	0.0130765	0.0121717	0.00555563	0.00400541	0.00397708	0.00790335	0.00869887	0.00915935	0.006956	0.00818701	0.00810391
396	0.00415757	0.00385441	0.00389136	0.00594139	0.00413573	0.00410721	0.00949392	0.00789704	0.0092107	0.00664052	0.00655797	0.00703825	0.0115389	0.0128823	0.0120688	0.0055895	0.00412636	0.00378442	0.00793278	0.00864305	0.00922321	0.0069312	0.00849402	0.00835122
395	0.00435591	0.00391975	0.00406907	0.00605292	0.00449786	0.00426836	0.0097059	0.00793293	0.00918072	0.00659064	0.00674289	0.00717387	0.0115667	0.012732	0.0120275	0.00563928	0.003987	0.00374359	0.00792165	0.0085301	0.00921274	0.0068718	0.0085042	0.0084242
394	0.00437965	0.00405375	0.00427951	0.00601912	0.00434712	0.00417659	0.00954216	0.00787802	0.00917427	0.00668035	0.00649916	0.00745668	0.0117265	0.012934	0.0119852	0.00534821	0.00418942	0.00403927	0.00802808	0.0086596	0.00903397	0.00686824	0.00842448	0.00869368
393	0.00450422	0.00401009	0.00422885	0.00630891	0.0041583	0.00416489	0.00943282	0.00778526	0.00909506	0.00686395	0.00655746	0.00764364	0.0118537	0.0132284	0.0122778	0.00531719	0.00426133	0.00424185	0.00800916	0.009026	0.00882477	0.00684963	0.00876044	0.00861984
392	0.00451761	0.00387384	0.00405814	0.0064575	0.00437895	0.00467367	0.00970223	0.007945	0.00905861	0.00674687	0.00680088	0.00731786	0.0118048	0.0130364	0.0122325	0.00515757	0.00421442	0.00422494	0.00779375	0.00913879	0.00925776	0.00664722	0.00871365	0.00821992
391	0.00458958	0.00398556	0.00412205	0.00642874	0.00436523	0.00437224	0.00984081	0.00785727	0.00904756	0.0068997	0.0064717	0.00755805	0.0117219	0.0132317	0.0123927	0.00526356	0.00403168	0.0039335	0.00769276	0.00907704	0.00932217	0.00663539	0.00882577	0.00840267
390	0.00453373	0.00396578	0.00407483	0.00637595	0.00435472	0.00442136	0.00978259	0.00804187	0.00917378	0.00685341	0.00635775	0.00725434	0.0116992	0.0131309	0.012468	0.00545556	0.00417956	0.00390183	0.00783709	0.00912551	0.00917926	0.00702059	0.00876119	0.00859259
389	0.00449791	0.00391957	0.00405381	0.00657117	0.00428095	0.00445771	0.00969203	0.00825921	0.00936748	0.00688551	0.00649557	0.00731143	0.0117027	0.0128833	0.0122331	0.00546327	0.00418795	0.00400406	0.0078049	0.00906259	0.00932482	0.00697984	0.00863925	0.00850705
388	0.00449258	0.00414557	0.00436041	0.00665098	0.0044447	0.00457431	0.00979549	0.00803038	0.00933377	0.00691196	0.00655865	0.00737636	0.011853	0.0125469	0.0121093	0.00536249	0.0038981	0.00377937	0.0078197	0.00910959	0.00924669	0.0068646	0.00871483	0.00854883
387	0.00457528	0.00412859	0.00429501	0.00667986	0.00456124	0.00471133	0.0100197	0.00815618	0.00940273	0.00680405	0.00626681	0.0071059	0.0116729	0.0123253	0.0119741	0.00527755	0.00393881	0.00403919	0.00787374	0.00889465	0.00964615	0.00685214	0.00921227	0.00861147
386	0.00456152	0.00393525	0.00429876	0.00674162	0.0045003	0.00452982	0.0101363	0.0081546	0.00963483	0.00706019	0.00626692	0.0072634	0.0118362	0.0128285	0.0119615	0.00549647	0.00421546	0.00406002	0.0078771	0.00879241	0.00954168	0.00708446	0.00932236	0.00868486
385	0.00456487	0.00367153	0.0041881	0.00694004	0.00474816	0.00495705	0.0101888	0.0081047	0.00953324	0.00703403	0.00643693	0.00723414	0.011948	0.0128065	0.0122798	0.00556903	0.00415461	0.00376765	0.00791951	0.00887261	0.00958663	0.00691476	0.00893615	0.00884675
384	0.00472233	0.00414617	0.00441464	0.00698446	0.00486873	0.00492664	0.0102302	0.00781529	0.00931011	0.00694797	0.0063685	0.00733606	0.0120228	0.0127646	0.0123045	0.00571439	0.00417384	0.00381319	0.00802062	0.00913971	0.0095109	0.00716271	0.00901227	0.00910087
383	0.00463939	0.00396572	0.0041906	0.00698631	0.00465384	0.00470896	0.010207	0.00788613	0.00940351	0.00691687	0.00649082	0.00733697	0.012023	0.0129653	0.0118496	0.00577011	0.00391697	0.00386108	0.00813765	0.00943702	0.00946102	0.00714481	0.00899742	0.00871952
382	0.00470936	0.00396537	0.00407549	0.00692571	0.00456647	0.004646	0.0102323	0.00840742	0.00940421	0.00697072	0.00643645	0.00705174	0.0119466	0.0130734	0.0119206	0.00568875	0.00354044	0.00377535	0.00818164	0.00935498	0.00967148	0.00714277	0.00890418	0.00852538
381	0.00503251	0.00394327	0.00429911	0.00694913	0.00471335	0.00470135	0.0101976	0.00823052	0.00950811	0.00706411	0.00636623	0.0072422	0.0121215	0.0133483	0.0120138	0.00570285	0.00358356	0.00375278	0.0081129	0.00929709	0.00964939	0.00718365	0.00878448	0.00883198
380	0.00498228	0.00404276	0.00431931	0.00724038	0.00476117	0.00473473	0.0103591	0.0081128	0.00931308	0.00717395	0.00647476	0.00726104	0.0121024	0.0133175	0.0118455	0.0057786	0.00395871	0.00391867	0.00814801	0.00916887	0.00939407	0.00745024	0.00904342	0.00896142
379	0.00487622	0.00425356	0.00432709	0.0074084	0.00485762	0.00465039	0.010513	0.00790197	0.00920797	0.0071358	0.0061916	0.00709364	0.0122184	0.01317	0.0119701	0.0056885	0.00415414	0.00391661	0.00799518	0.0093068	0.0097321	0.00725239	0.00940079	0.00863069
378	0.00497476	0.00428616	0.0043499	0.00728329	0.00489142	0.00483969	0.0104396	0.00786259	0.00923235	0.00695141	0.0060856	0.00688934	0.0120869	0.0131161	0.0117756	0.00570366	0.00403934	0.00397009	0.00823138	0.00943346	0.0101199	0.0073282	0.00925755	0.00879815
377	0.00493641	0.00398123	0.00417432	0.00713868	0.00492207	0.00494191	0.0104806	0.0080358	0.00933077	0.00730154	0.00640506	0.00709945	0.0122507	0.0133001	0.011985	0.00583005	0.00385481	0.00429814	0.00835037	0.00912343	0.00969192	0.00747093	0.0093256	0.0087546
376	0.00494775	0.00368312	0.00416945	0.00728269	0.00486612	0.00516084	0.0103199	0.00822152	0.00922192	0.00738409	0.00646585	0.00698729	0.0121063	0.0131447	0.0122842	0.0056588	0.00400323	0.00432046	0.00832297	0.00897025	0.00967925	0.00722374	0.00934671	0.00897321
375	0.00512553	0.00401371	0.00446465	0.00741715	0.00509925	0.00533214	0.0103992	0.00837981	0.00950257	0.0074509	0.00645797	0.00700662	0.0122465	0.0132808	0.0126142	0.00570283	0.00400975	0.00435021	0.00844766	0.00942567	0.00975377	0.00727976	0.00925295	0.00906775
374	0.00509591	0.00412378	0.00444618	0.00747345	0.00508588	0.00526294	0.010605	0.0086269	0.00967049	0.00735944	0.00655109	0.00716958	0.0123031	0.0133318	0.0123806	0.00595065	0.00409035	0.00419691	0.00857168	0.0093844	0.0097451	0.00758453	0.00922915	0.00898455
373	0.00503732	0.00426472	0.004452	0.00743576	0.00493454	0.00506818	0.0106755	0.00880172	0.00979519	0.00749746	0.00656861	0.0072582	0.0126766	0.0133163	0.0122131	0.0059003	0.00425268	0.00430447	0.00857283	0.00925922	0.00998812	0.00750318	0.00906938	0.00914028
372	0.00521931	0.00398152	0.00418472	0.00757219	0.00509159	0.00527411	0.0106459	0.00862263	0.0096727	0.0075763	0.00638127	0.00707335	0.0125324	0.013292	0.0122542	0.00583243	0.00435438	0.00474622	0.00838815	0.0092225	0.0101172	0.00738073	0.00888053	0.00936513
371	0.00524604	0.0039893	0.00451074	0.00741423	0.00511136	0.00530108	0.0107712	0.0087544	0.00960267	0.00767466	0.00665851	0.00716932	0.0126061	0.0131221	0.0122516	0.00581378	0.00436473	0.0045308	0.00823506	0.00923388	0.00981918	0.00736481	0.00897532	0.00905642
370	0.0053204	0.00396293	0.00433986	0.00749069	0.00519553	0.00518721	0.0101616	0.00821735	0.00925778	0.00773162	0.00685595	0.0076755	0.0123027	0.0128485	0.0122172	0.00617515	0.00405224	0.00429944	0.00852543	0.00894136	0.0095238	0.00765951	0.00932918	0.00904908
369	0.00524667	0.00428017	0.00458059	0.00737741	0.00492165	0.00497291	0.0103937	0.00827615	0.00948582	0.00763364	0.00665184	0.00760205	0.0122055	0.0128525	0.0121964	0.006278	0.0042066	0.00422163	0.00876228	0.00895183	0.00987084	0.00767789	0.00933203	0.00916163
368	0.00513691	0.00400914	0.00432905	0.0075834	0.00529288	0.00515294	0.0103982	0.00811642	0.00938683	0.00769255	0.00639941	0.00746533	0.012179	0.0134291	0.0118519	0.00638789	0.0043816	0.00440655	0.00893049	0.00892945	0.00944345	0.00785913	0.00926657	0.00932507
367	0.00512624	0.00405541	0.00426276	0.00735363	0.00523229	0.0053499	0.0104632	0.00802454	0.00922826	0.00800741	0.00666093	0.00770547	0.0126588	0.0136955	0.0120006	0.00619574	0.00437792	0.00443155	0.00872464	0.00909893	0.00931373	0.00774005	0.00917459	0.00917339
366	0.00522709	0.0041271	0.00434716	0.00733734	0.00508	0.00513595	0.0106632	0.00821059	0.00944929	0.0080031	0.00666964	0.00778563	0.0127351	0.0135538	0.0125017	0.00613018	0.00450749	0.00458583	0.00873421	0.00907857	0.00979467	0.00753456	0.00916931	0.00904321
365	0.0053166	0.00417462	0.00443519	0.00747547	0.00509265	0.00533018	0.0105754	0.00846092	0.00951825	0.00779369	0.00642604	0.00740049	0.0127348	0.0133597	0.0126461	0.00636365	0.00479557	0.0047322	0.00886149	0.00908327	0.0100109	0.00780363	0.00912691	0.00896991
364	0.00516879	0.00446685	0.00472195	0.00744358	0.00519885	0.00540163	0.0104528	0.00838233	0.0093227	0.00785473	0.00668156	0.00738273	0.0126818	0.0137022	0.012582	0.00625008	0.00462083	0.00458205	0.00863394	0.00900874	0.0095963	0.00773948	0.00912233	0.00897173
363	0.00527293	0.00442266	0.00472878	0.0076062	0.00529888	0.00550385	0.0105258	0.00824591	0.00949934	0.00789708	0.00692478	0.00766729	0.0127849	0.0136766	0.0126939	0.00600888	0.00453809	0.0044569	0.008507	0.00898125	0.00950502	0.00762463	0.00901976	0.00898206
362	0.00527107	0.00404347	0.00430363	0.00758916	0.00539445	0.00545527	0.0105785	0.00824735	0.00952914	0.0077946	0.00730676	0.00757398	0.0130101	0.0137027	0.0126392	0.0062148	0.00476237	0.00462404	0.0086603	0.00894077	0.00990387	0.00772117	0.0091942	0.0090496
361	0.00524052	0.00436932	0.00424625	0.00760242	0.00533517	0.00536873	0.010572	0.00798201	0.00956965	0.00794869	0.00719302	0.00755545	0.0131063	0.0137356	0.0128287	0.00640784	0.00450014	0.0047126	0.00879798	0.00922239	0.010256	0.00787196	0.00911894	0.00892014
360	0.00532298	0.00453557	0.00429614	0.00766055	0.00521941	0.00548437	0.010479	0.0080202	0.00974028	0.00809893	0.00712846	0.00763308	0.0130106	0.013649	0.0127184	0.00640323	0.00448966	0.00471329	0.0088119	0.00934207	0.00999987	0.0077911	0.009204	0.0085095
359	0.00542007	0.00422053	0.00454614	0.00750002	0.00534527	0.00547612	0.0107068	0.00842705	0.00967122	0.00815712	0.00732338	0.00794715	0.0132135	0.0137553	0.0128037	0.00642786	0.00423064	0.00427073	0.00888533	0.0095263	0.0096901	0.00801654	0.00900335	0.00821195
358	0.00548125	0.00419113	0.00458754	0.00731061	0.00546127	0.00552607	0.0109189	0.00841056	0.00961588	0.0080131	0.00704689	0.00808085	0.0130412	0.0134403	0.0127846	0.00619785	0.00415592	0.00434991	0.00887266	0.00968907	0.00983647	0.00795657	0.0088361	0.00833903
357	0.00545028	0.00409758	0.00440466	0.00722846	0.00541316	0.00547843	0.010929	0.00843982	0.009807	0.00825238	0.00698802	0.00791555	0.0131093	0.0136115	0.012844	0.00635308	0.00473725	0.00449367	0.00897604	0.00969738	0.00971388	0.00793369	0.0085918	0.0083996
356	0.00527528	0.0040993	0.00433641	0.00736048	0.00569546	0.00581271	0.0106756	0.0085263	0.00977919	0.008477	0.00671217	0.00791475	0.0132627	0.0137161	0.0129838	0.00636995	0.00469395	0.00472686	0.00897735	0.00964031	0.00975411	0.00808275	0.00842942	0.00853502
355	0.00512396	0.00451733	0.00463725	0.00739634	0.00563423	0.00575266	0.0106843	0.008407	0.00944153	0.00839624	0.0070595	0.00804524	0.0134618	0.0137024	0.0130536	0.00640527	0.00446096	0.00448597	0.00899891	0.00961599	0.0101484	0.00801431	0.00848189	0.00866759
354	0.0052391	0.00462211	0.00439634	0.0073983	0.00537199	0.00556723	0.010753	0.00866105	0.00954646	0.00848021	0.00729924	0.00808624	0.0136166	0.0137638	0.0131171	0.00653857	0.0044564	0.00418787	0.00913961	0.00949686	0.0101697	0.00811595	0.00871438	0.00887528
353	0.00520597	0.00457394	0.00455891	0.00747985	0.00558386	0.00554579	0.0108423	0.00896979	0.00932563	0.00875838	0.00764957	0.0080129	0.0137685	0.014099	0.0135553	0.0067386	0.00443096	0.00423454	0.0093073	0.00951944	0.00999096	0.0083115	0.00877448	0.00853888
352	0.00521363	0.00458356	0.00473555	0.00741709	0.00510762	0.00527387	0.0108549	0.00878511	0.00939035	0.00865456	0.00794264	0.00799859	0.0136919	0.0142003	0.013315	0.00666667	0.00474826	0.00458237	0.00931084	0.00925457	0.0102035	0.00830414	0.0089177	0.0084727
351	0.0052462	0.00396697	0.00441143	0.00747189	0.00498069	0.00510299	0.0108807	0.00884187	0.00968638	0.00864945	0.00778625	0.00819816	0.0134683	0.014063	0.0131566	0.00637476	0.00480748	0.00491706	0.00921887	0.00957023	0.0104009	0.00805299	0.00901725	0.00853335
350	0.00515985	0.00441684	0.00474553	0.0074291	0.00536469	0.00530897	0.0108878	0.00853494	0.00989401	0.00890079	0.00773993	0.00823939	0.013679	0.0138379	0.0131197	0.00648662	0.00446872	0.00466615	0.00916974	0.00938856	0.00995376	0.00812962	0.00914198	0.00863128
349	0.00516267	0.00508985	0.0050652	0.00740576	0.00523657	0.00556266	0.0105371	0.00841709	0.00992475	0.0088489	0.00769607	0.00834847	0.0138533	0.0139339	0.0132942	0.00656356	0.00476826	0.00471991	0.00902259	0.0093135	0.0099342	0.00798106	0.00869999	0.00868069
348	0.00507399	0.00485874	0.00481075	0.00727955	0.00477601	0.00525492	0.0109428	0.00886355	0.0099076	0.00890133	0.00751754	0.00851278	0.0136914	0.0140462	0.013404	0.00647846	0.00513605	0.00474766	0.00908402	0.00954681	0.00997231	0.0079878	0.00834906	0.00829136
347	0.00522836	0.00435025	0.00464599	0.00714523	0.00499287	0.00538868	0.0109616	0.00871891	0.00984281	0.0087884	0.00750461	0.00840345	0.0137807	0.014123	0.0134326	0.00665347	0.00508725	0.00474709	0.00920104	0.009329	0.00964455	0.00816266	0.00809873	0.00810093
346	0.00509288	0.0047425	0.00493459	0.00726659	0.00543656	0.00576757	0.0105316	0.0083761	0.00958623	0.00869046	0.00751303	0.00823956	0.0136658	0.0142375	0.0133731	0.00666106	0.00486885	0.00477613	0.00940129	0.00974481	0.00985481	0.00824164	0.00811227	0.00799045
345	0.00521175	0.00531977	0.0049119	0.00720109	0.00540745	0.00556295	0.0106153	0.00866746	0.00951808	0.00881713	0.00752551	0.00856091	0.0137986	0.0144977	0.0133739	0.00682142	0.00490069	0.00478492	0.0097054	0.00969222	0.0100165	0.00826975	0.00796152	0.00815242
344	0.00537626	0.00512585	0.00496554	0.00724062	0.00553563	0.00555042	0.0105905	0.00883565	0.00952677	0.00877307	0.00758907	0.00870423	0.0138231	0.0146606	0.0132675	0.00694971	0.00490734	0.00477317	0.00964272	0.00950416	0.00985036	0.00848021	0.0080152	0.00805114
343	0.00513024	0.00486486	0.00493471	0.0071484	0.0055307	0.00546857	0.0107526	0.00852881	0.00935959	0.00851804	0.00761867	0.00860844	0.0136789	0.0142315	0.0131769	0.00693714	0.00507482	0.00499172	0.00961114	0.00924909	0.00981034	0.00855877	0.00823225	0.00782283
342	0.00514873	0.00421982	0.00476905	0.00728495	0.00513952	0.00539516	0.010727	0.00846322	0.00952194	0.00867962	0.00764787	0.00867691	0.013819	0.0143564	0.013323	0.00713554	0.00500385	0.00504536	0.0095984	0.00917234	0.00978464	0.00857397	0.00818122	0.00794933
341	0.0052976	0.00429472	0.00517313	0.0071994	0.00527856	0.00555677	0.0105946	0.00866014	0.009593	0.00878157	0.00791199	0.00837617	0.0137372	0.0145582	0.0133349	0.00712738	0.00502283	0.00502663	0.00933684	0.00921641	0.00972001	0.00840357	0.00818645	0.00793192
340	0.00520157	0.00374762	0.0042475	0.00695166	0.00559823	0.005519	0.0108224	0.00887082	0.00994278	0.00911898	0.008137	0.00871136	0.0133813	0.0138497	0.0132359	0.00689477	0.00439239	0.00414536	0.00918732	0.00831434	0.00901135	0.00832283	0.0076031	0.00734455
339	0.00498695	0.00418971	0.00476882	0.00720488	0.00556634	0.00575136	0.0108403	0.00911983	0.0099656	0.00910478	0.00788288	0.00841376	0.0132839	0.0136365	0.0132367	0.00711816	0.00427921	0.00428806	0.00933931	0.00821799	0.00906244	0.0084751	0.00770636	0.00762849
338	0.00499503	0.00437526	0.00490293	0.0073309	0.00529276	0.00548859	0.0109275	0.00908076	0.0100393	0.00918046	0.0080084	0.00903263	0.0133581	0.0137696	0.0130651	0.0068839	0.00425549	0.00416253	0.00930666	0.00860973	0.00917124	0.00834272	0.00769626	0.00733946
337	0.00511343	0.00413114	0.00490008	0.00726177	0.00561451	0.00568317	0.0107985	0.00866156	0.00982116	0.00905056	0.00816881	0.0093309	0.0134269	0.0137048	0.0128434	0.00674531	0.00443106	0.00422288	0.00920189	0.00877111	0.00932834	0.00815345	0.00732769	0.00734343
336	0.0049314	0.00421435	0.00458796	0.00710261	0.00595455	0.00563476	0.0108722	0.00876598	0.00996685	0.00909445	0.00801977	0.00899802	0.013408	0.013735	0.0132009	0.00685008	0.00463176	0.0042091	0.00928921	0.00886323	0.00946935	0.00832473	0.00731446	0.00734036
335	0.0049434	0.0041059	0.00456212	0.0071422	0.00588571	0.00584419	0.0109445	0.00894421	0.00977282	0.00929461	0.0080187	0.00945371	0.01354	0.0139412	0.0135418	0.00679344	0.00446713	0.0042937	0.00917273	0.0090341	0.0091463	0.00833518	0.00728023	0.00741322
334	0.00500758	0.00404923	0.0046916	0.0073822	0.00629531	0.00614385	0.0110035	0.00876072	0.00940724	0.00935352	0.00837318	0.0094881	0.0134468	0.0138632	0.0133318	0.00711028	0.00444252	0.00438182	0.00928203	0.00908104	0.00890834	0.00835967	0.00746371	0.0071871
333	0.00506031	0.00404318	0.00465074	0.00758395	0.00621126	0.00586029	0.0110823	0.00893413	0.0100521	0.00945457	0.00832328	0.00910238	0.0135119	0.0138996	0.0128289	0.00722547	0.00435545	0.00436721	0.00933087	0.00859034	0.00918155	0.00836579	0.00766771	0.00739075
332	0.00510986	0.00420343	0.00454127	0.00741457	0.00619712	0.00561932	0.010913	0.00893644	0.0101261	0.009482	0.00823912	0.00909478	0.0135446	0.0140104	0.0131253	0.00715924	0.00443588	0.00439608	0.00930961	0.00821273	0.00895631	0.00835714	0.00752969	0.00744665
331	0.00507245	0.00433142	0.00447528	0.00732458	0.00573003	0.00541993	0.0110287	0.00902368	0.0100228	0.00944926	0.00795574	0.00894053	0.0135804	0.0141011	0.0130313	0.00718516	0.00449699	0.00439994	0.00937602	0.00837797	0.00893117	0.00831863	0.00725681	0.00746778
330	0.00501459	0.00446251	0.00447807	0.00718069	0.00613012	0.00585589	0.0110363	0.009226	0.00982618	0.00950902	0.00796392	0.00885492	0.013559	0.013703	0.0131985	0.00725724	0.00461814	0.00428148	0.00949026	0.00847674	0.0089709	0.00844024	0.00735778	0.00719195
329	0.00516008	0.00408535	0.00436789	0.00712454	0.00622451	0.0061546	0.0109483	0.00894623	0.00972718	0.00946674	0.00833703	0.00890681	0.0137663	0.0138585	0.0132324	0.00718553	0.00466795	0.00440174	0.00947267	0.00860361	0.0089023	0.00844742	0.00704122	0.0069937
328	0.00522815	0.00409497	0.00475302	0.00738717	0.00600688	0.0059669	0.0107617	0.00889277	0.00961903	0.00960017	0.00849126	0.00909805	0.0139266	0.0139151	0.0132685	0.00715303	0.00471784	0.00439598	0.00948588	0.00843518	0.00887202	0.00847924	0.00705411	0.0070003
327	0.00530063	0.00444148	0.00499333	0.00738375	0.00605434	0.0058006	0.010874	0.0091716	0.00992847	0.00972048	0.00835178	0.00925638	0.0138072	0.0141227	0.0134348	0.0073737	0.00450828	0.00457314	0.00944893	0.00826702	0.00888352	0.00831941	0.00706498	0.00691102
326	0.00521969	0.00477309	0.00487579	0.00748504	0.00644077	0.00627683	0.0109283	0.00895534	0.0100893	0.00963919	0.00848775	0.00938914	0.0136272	0.0138041	0.0129885	0.00754126	0.00470403	0.00457846	0.0095439	0.00891142	0.00923331	0.00860244	0.00713958	0.00730364
325	0.00525002	0.00483807	0.00515608	0.00737097	0.00667847	0.00627588	0.0110605	0.00932306	0.0104676	0.009526	0.00838832	0.00947349	0.0136796	0.0136244	0.0129342	0.00767367	0.00442691	0.00440582	0.00950665	0.00870169	0.00926411	0.00857277	0.0071674	0.00742536
324	0.00515726	0.00484199	0.00504934	0.00743995	0.00655837	0.00603978	0.0113545	0.00965443	0.0105748	0.00958498	0.00827437	0.00949074	0.0136061	0.0137312	0.013492	0.00747477	0.00440277	0.00406891	0.00943785	0.00879103	0.00938404	0.0083904	0.00708371	0.00687885
323	0.00509219	0.00490038	0.00494748	0.00766011	0.00616552	0.0061505	0.0113754	0.00971539	0.0103469	0.00980619	0.00843832	0.00957884	0.0137396	0.0141522	0.0132778	0.00748077	0.00431205	0.00432441	0.00927627	0.00879191	0.00945913	0.00823773	0.00680724	0.00683937
322	0.00522898	0.00488369	0.00507637	0.00774008	0.00610512	0.00621892	0.0112347	0.00954348	0.0105376	0.00952079	0.00860567	0.0094292	0.0138909	0.0141832	0.0130801	0.00760344	0.00421567	0.00440627	0.00933559	0.00865327	0.00913854	0.00836987	0.00661782	0.00695317
321	0.00533891	0.00481544	0.00518108	0.00775222	0.00657393	0.0064195	0.0112017	0.00911116	0.0102899	0.00954503	0.00871302	0.00927675	0.0138878	0.0141033	0.0135189	0.00759626	0.00434872	0.00456973	0.00929616	0.00875806	0.00902843	0.00841916	0.00675955	0.00690115
320	0.00532658	0.00474607	0.00499987	0.00771624	0.00662988	0.00637282	0.0113071	0.00890965	0.0105928	0.00968392	0.00874281	0.00937391	0.0137666	0.0142335	0.0137221	0.00748164	0.00414606	0.00434367	0.00916781	0.00870767	0.00908074	0.0082173	0.00676582	0.00682807
319	0.00558854	0.00467954	0.00511112	0.00769508	0.00665655	0.00639509	0.0114536	0.00917482	0.0106158	0.00981928	0.00892479	0.00948097	0.0137957	0.0143697	0.0134203	0.00770362	0.00484894	0.00480463	0.00923193	0.00887268	0.0093074	0.00824837	0.00693629	0.00686127
318	0.0055682	0.00480641	0.00483962	0.00774492	0.00678431	0.00648329	0.0115118	0.00930407	0.010599	0.00971875	0.00891289	0.00967402	0.0137916	0.0143965	0.0132747	0.00804907	0.00498752	0.00484414	0.00946863	0.00911721	0.00939638	0.00855172	0.00698721	0.00688957
317	0.0056532	0.00480249	0.00502695	0.00786131	0.00699184	0.00675248	0.011568	0.00948857	0.0107788	0.00984718	0.00908672	0.00989931	0.0139737	0.0143111	0.0133596	0.00808277	0.00477134	0.00502288	0.00941643	0.0089741	0.00937473	0.00858094	0.00699558	0.00683622
316	0.00540289	0.00472605	0.00499369	0.00796939	0.00717353	0.00701299	0.0115011	0.00945318	0.0105851	0.0100195	0.00902248	0.00979509	0.014022	0.0142336	0.0137021	0.00818978	0.00492676	0.00530772	0.00927806	0.00867402	0.00949094	0.00857976	0.00710709	0.00682603
315	0.0054218	0.00506378	0.00523502	0.00819684	0.00717009	0.00696511	0.0112878	0.00946544	0.010411	0.0102664	0.0091292	0.00980669	0.0140519	0.0139627	0.0139184	0.00824306	0.00511102	0.00495291	0.00924608	0.00899262	0.00956822	0.00832063	0.00716637	0.00674757
314	0.00557359	0.0051758	0.00555326	0.00837366	0.00722776	0.00686052	0.0114368	0.0098259	0.0103331	0.0104068	0.00967304	0.0100011	0.0142707	0.0141049	0.0140216	0.00843972	0.00525627	0.00502677	0.00944643	0.00925499	0.0097219	0.00838419	0.00708767	0.00657882
313	0.00585404	0.0050984	0.00549588	0.0083265	0.00734703	0.00698002	0.0116668	0.00963253	0.0103897	0.010302	0.00946555	0.0104309	0.0144999	0.0144465	0.014025	0.00837308	0.00515112	0.00513015	0.0095373	0.00890178	0.00963418	0.00857172	0.0070042	0.00670413
312	0.005915	0.00562293	0.00586948	0.00832836	0.00756264	0.00729346	0.0119357	0.00962214	0.0106776	0.0103015	0.00947383	0.010394	0.0145651	0.014819	0.0142552	0.00829642	0.00499392	0.00501245	0.00938194	0.00913517	0.00978405	0.00862775	0.00695729	0.00688031
311	0.00578754	0.00547973	0.00578657	0.00851672	0.00771024	0.00740548	0.0119777	0.00977424	0.0107362	0.0106681	0.00954398	0.0106544	0.0146956	0.0148972	0.0143274	0.00842893	0.00506678	0.00523059	0.00930098	0.0093068	0.00984053	0.00846938	0.00716582	0.00707565
310	0.00630404	0.0057043	0.00591944	0.00865385	0.00782089	0.00768761	0.0121619	0.0103347	0.0109339	0.010812	0.00969353	0.0107652	0.0148567	0.0148295	0.0146595	0.00885181	0.00552141	0.0057078	0.00952889	0.00921488	0.00984673	0.00865719	0.00743325	0.00746545
309	0.00667966	0.00586224	0.00613694	0.00891891	0.00786508	0.00777539	0.0124235	0.0105231	0.01131	0.0114683	0.0102961	0.0115177	0.0154174	0.0156247	0.0148547	0.00909131	0.00560069	0.00593812	0.0094947	0.00937081	0.0101758	0.00888273	0.00750606	0.0073894
308	0.00668479	0.00610214	0.00637554	0.0093688	0.00836793	0.00806923	0.0125728	0.010578	0.0117356	0.011721	0.0104056	0.0120541	0.0156212	0.0164493	0.0152026	0.00930064	0.00600877	0.00601145	0.00971279	0.00952053	0.0102779	0.0091006	0.0075252	0.00745695
307	0.00687686	0.00645305	0.0066095	0.00958486	0.00829012	0.00823738	0.0128209	0.0108591	0.0117976	0.0122716	0.0110003	0.0122826	0.0161134	0.0168339	0.0154256	0.00962507	0.00655402	0.00632754	0.00996494	0.0104782	0.0110421	0.00915461	0.00763302	0.00761764
306	0.00741021	0.00673898	0.00724646	0.00990262	0.00887202	0.00851695	0.013393	0.0112724	0.012265	0.0128628	0.0115857	0.012714	0.0166401	0.0172868	0.0162296	0.00999623	0.00697928	0.00681388	0.0104988	0.0106305	0.0113711	0.0093267	0.00809876	0.00810476
305	0.00771585	0.00698678	0.00742976	0.0102626	0.00913705	0.00873161	0.0138785	0.011723	0.0128086	0.013773	0.0126966	0.0136425	0.0173759	0.0177123	0.017081	0.0103386	0.00778617	0.00755107	0.010665	0.0107885	0.0117227	0.00962961	0.00835643	0.00833124
304	0.008188	0.00763533	0.00782504	0.0105439	0.00937499	0.00907878	0.0144409	0.0127104	0.0134982	0.0149901	0.0139659	0.0150111	0.0184826	0.0189064	0.0183505	0.0110722	0.0086919	0.0085334	0.0111639	0.0116123	0.0122621	0.0103861	0.00933773	0.00884353
303	0.00885417	0.00821028	0.00827128	0.0110903	0.00990338	0.00979052	0.0151898	0.0134956	0.0141636	0.0162062	0.0152442	0.0163103	0.0198137	0.0199709	0.019527	0.0122261	0.00939728	0.00924288	0.0120971	0.0129051	0.0132617	0.0115286	0.0104123	0.0100256
302	0.00961862	0.00931915	0.00931891	0.0117382	0.010149	0.00993111	0.0156805	0.014152	0.0148145	0.0176855	0.0167986	0.0175661	0.0213828	0.0214416	0.0209073	0.013191	0.0105641	0.0104124	0.0131909	0.013892	0.0147016	0.012508	0.0111358	0.0108766
301	0.0106575	0.0101542	0.0102896	0.0123902	0.0107707	0.0106791	0.0168216	0.0152858	0.0159567	0.019471	0.0184443	0.0190109	0.0231529	0.0233049	0.0226875	0.0147908	0.0119937	0.0118955	0.014676	0.0155167	0.0161706	0.0138413	0.0121963	0.0121671
300	0.0116278	0.0109902	0.0112927	0.0131557	0.0118002	0.0116785	0.0181004	0.0167705	0.0171887	0.0216649	0.0205001	0.0213976	0.0250657	0.0255702	0.0249119	0.0165101	0.0136944	0.0136932	0.0160934	0.0173593	0.0174981	0.0153419	0.0138833	0.0139621
299	0.0128406	0.01231	0.0126054	0.0141458	0.0128059	0.0128027	0.019561	0.0185204	0.0188409	0.0241536	0.0229975	0.0239219	0.0273973	0.0278502	0.0275179	0.0180465	0.0155781	0.0154732	0.0177402	0.0190977	0.019289	0.0169065	0.015579	0.0155113
298	0.0143089	0.0139966	0.0143339	0.0151928	0.0141048	0.013889	0.0209376	0.0196144	0.0201	0.0270765	0.0259301	0.0267617	0.0303776	0.0306008	0.0300627	0.0201458	0.0179535	0.0178952	0.0197102	0.0210341	0.0212842	0.0188186	0.0177997	0.0176906
297	0.0162249	0.0155791	0.0157574	0.0164542	0.0154702	0.015224	0.0227391	0.0211177	0.0218522	0.030449	0.0289243	0.0301454	0.0336807	0.0336714	0.0329942	0.0226115	0.0204257	0.0203772	0.0221103	0.0235162	0.0235461	0.0211966	0.0203532	0.0203786
296	0.0183241	0.0175244	0.0177975	0.0178594	0.016988	0.0168913	0.0251007	0.023237	0.0240026	0.0345122	0.0331274	0.0344349	0.037825	0.0377966	0.0371567	0.0256333	0.023301	0.023296	0.025037	0.0264799	0.0263802	0.0243428	0.0231045	0.0232282
295	0.0206237	0.0199254	0.0202616	0.0197512	0.0186746	0.0184951	0.0276354	0.0257719	0.02659	0.0395562	0.0385395	0.0398289	0.0427648	0.0432054	0.0422609	0.0294427	0.0274177	0.027021	0.028808	0.0302094	0.0306255	0.0279079	0.0269627	0.0268308
294	0.0235313	0.0228417	0.0232499	0.0220334	0.0205196	0.0205163	0.0306455	0.0289348	0.0294985	0.0451137	0.0444544	0.0452892	0.0484754	0.0489802	0.0478556	0.0337822	0.0317595	0.0315979	0.0332284	0.0346027	0.0350205	0.0322324	0.031586	0.0312908
293	0.026635	0.026277	0.0265717	0.0241882	0.0228822	0.022715	0.0335612	0.031818	0.0325724	0.0509714	0.050252	0.0510518	0.0543213	0.0544966	0.0538161	0.037959	0.0363108	0.0364366	0.0376329	0.0391907	0.0395993	0.036673	0.0359293	0.0358527
292	0.0297752	0.0290878	0.0293781	0.0261397	0.0251302	0.0245233	0.0361344	0.0343506	0.0351412	0.0562712	0.0551609	0.0564974	0.0591496	0.059675	0.0589083	0.0418226	0.0405439	0.0404678	0.0414197	0.0433948	0.0438118	0.0405115	0.0400654	0.040072
291	0.0321144	0.0315369	0.0317549	0.0278695	0.0263423	0.0261785	0.0384679	0.0364907	0.0375688	0.0605543	0.059489	0.0608304	0.0633237	0.0635535	0.0628247	0.0450983	0.043512	0.0436187	0.0445981	0.0467689	0.0472694	0.0435371	0.0433858	0.0431854
290	0.034141	0.0333062	0.0336431	0.0291986	0.0280252	0.0278634	0.0403826	0.0381088	0.0391989	0.0642107	0.0628449	0.0640371	0.0669025	0.0665577	0.06603	0.0477177	0.0463084	0.0463968	0.0473554	0.0496316	0.0505779	0.0462372	0.046167	0.0460593
289	0.0365524	0.0353958	0.0357835	0.0305069	0.0296302	0.0291027	0.0424122	0.0402663	0.0411834	0.068433	0.0669639	0.0676974	0.0710091	0.070606	0.0698895	0.0508554	0.0496145	0.0494673	0.0502485	0.0529028	0.0534919	0.0490976	0.0488357	0.0489975
288	0.0390813	0.0380777	0.0382537	0.0321666	0.0308763	0.0306124	0.0451981	0.0427921	0.0438157	0.0731833	0.0715925	0.0725734	0.0757892	0.0756368	0.0748016	0.0546162	0.0531656	0.0530038	0.0537269	0.05625	0.056719	0.0526628	0.0525915	0.0525289
287	0.0418015	0.040685	0.0407997	0.0340682	0.0329176	0.0329222	0.0477459	0.0453491	0.0464157	0.0779558	0.0764521	0.0775601	0.0805309	0.0805505	0.0796717	0.0585425	0.0566801	0.0565198	0.0576634	0.0601155	0.060484	0.0567686	0.0567279	0.0565258
286	0.0443532	0.0436604	0.0436299	0.0360633	0.0347575	0.0345667	0.0499534	0.0474958	0.0485563	0.0823955	0.0811798	0.0818029	0.0846255	0.0848779	0.0839421	0.0619005	0.060157	0.0600986	0.0610875	0.0635921	0.0638856	0.0600144	0.0599736	0.0600622
285	0.0466001	0.0458389	0.045772	0.0374345	0.0361625	0.0357549	0.0515952	0.0495575	0.0503837	0.0860141	0.084243	0.0852197	0.0880824	0.0883464	0.087264	0.0644432	0.0629478	0.0627785	0.0636106	0.0663673	0.0665432	0.0624569	0.0625592	0.0626818
284	0.0481256	0.0473984	0.0474674	0.0385433	0.0373294	0.0372473	0.0526387	0.0507017	0.0515599	0.0885075	0.0870051	0.0879217	0.090579	0.0908224	0.0897912	0.0661044	0.0647825	0.0643915	0.065326	0.0681792	0.0683989	0.0640553	0.0647777	0.0645653
283	0.0495364	0.0487943	0.0489634	0.039504	0.0381457	0.0382125	0.0535715	0.0515964	0.0526451	0.0907457	0.0895267	0.0900971	0.0925755	0.0926959	0.0921082	0.067432	0.0664348	0.0659273	0.0665323	0.0694754	0.0699971	0.0653468	0.0666718	0.0661554
282	0.0506968	0.0499947	0.0503573	0.040249	0.0388227	0.038905	0.0546075	0.0523534	0.0536941	0.0923978	0.0908205	0.091882	0.0946293	0.0941951	0.0939089	0.0687036	0.0678116	0.0675051	0.0678893	0.0707945	0.0714647	0.0668349	0.0677889	0.0674547
281	0.0517417	0.0510428	0.0512815	0.0406693	0.0394495	0.0391341	0.0550883	0.0529659	0.0540513	0.0940472	0.0922679	0.0934487	0.0960799	0.0954718	0.0948202	0.0693532	0.0686813	0.068421	0.0686093	0.0720582	0.0726287	0.0676269	0.0685886	0.0686124
280	0.0526361	0.0516073	0.0518409	0.0409383	0.0398358	0.0396202	0.0550867	0.0529614	0.0537832	0.0950512	0.0936382	0.0942471	0.0968159	0.0964454	0.0957875	0.0697587	0.0690859	0.0688981	0.0692802	0.0728775	0.0732157	0.0681932	0.0691764	0.0694022
279	0.0532239	0.0519621	0.0522659	0.0410662	0.0398152	0.0397972	0.0548981	0.0529748	0.0538367	0.0955626	0.0945266	0.0949313	0.0974204	0.0972022	0.0967255	0.070103	0.0690163	0.0692825	0.0696282	0.0728462	0.0732397	0.0684276	0.0697839	0.0696943
278	0.0536447	0.0525148	0.0530829	0.0411203	0.0401516	0.039918	0.0546568	0.0529324	0.053944	0.0959594	0.0946528	0.0953033	0.097703	0.0973076	0.0972199	0.0701057	0.0692822	0.0697109	0.0694986	0.0730052	0.073462	0.0682511	0.0700566	0.0697481
277	0.0540275	0.0532727	0.0534167	0.0413149	0.0400616	0.0396972	0.0544322	0.0525903	0.0533058	0.0958008	0.094464	0.0953851	0.0975371	0.0970386	0.096595	0.0699185	0.0690843	0.0695829	0.0691769	0.0728126	0.0733039	0.0679914	0.07003	0.0698544
276	0.0542106	0.0537404	0.0537566	0.0411843	0.0402285	0.0400672	0.0541034	0.0520902	0.0529375	0.0955614	0.0943489	0.0952572	0.0972268	0.0967854	0.0964269	0.0695765	0.0688018	0.0689127	0.0688816	0.0725815	0.0729269	0.0678504	0.0695221	0.0697731
275	0.0541535	0.0537304	0.0539714	0.0410129	0.0402203	0.0397412	0.0537909	0.0516598	0.0526129	0.0948641	0.0937157	0.0946329	0.0963559	0.0965737	0.0958867	0.0688169	0.0682413	0.0682502	0.0679516	0.0721738	0.0724518	0.0671909	0.069071	0.0688698
274	0.054131	0.053424	0.0537363	0.0407489	0.0396892	0.0394594	0.052807	0.0506761	0.0516723	0.0940723	0.0927826	0.0940046	0.0954777	0.0958339	0.0950912	0.06809	0.067555	0.0676753	0.0671022	0.0710972	0.0714589	0.0663205	0.0684468	0.068136
273	0.0539524	0.053237	0.0534078	0.0404912	0.0393417	0.0390754	0.0518686	0.0499033	0.0510596	0.0932587	0.0917253	0.0930771	0.0945548	0.0948133	0.0941331	0.0671629	0.0666082	0.0668266	0.0662827	0.0702407	0.0707103	0.0655488	0.0678079	0.0676061
272	0.0535295	0.0529633	0.0533859	0.0401213	0.0388678	0.0387516	0.0509229	0.049126	0.0501982	0.0921931	0.0908218	0.0920509	0.0934478	0.0937289	0.0932556	0.0662128	0.0653354	0.065532	0.0653668	0.0695621	0.0699353	0.0647383	0.0670307	0.0670272
271	0.0534094	0.0526295	0.0530748	0.0397742	0.0384202	0.0382022	0.0500978	0.0482808	0.0492172	0.0911462	0.0901079	0.0912996	0.0926785	0.0930763	0.0922867	0.0656137	0.0645512	0.0646502	0.0647948	0.0687238	0.0688692	0.0641328	0.066443	0.0664414
270	0.0531191	0.0523399	0.0528476	0.0393586	0.0382681	0.0379089	0.0491929	0.046913	0.0480454	0.0903325	0.0891408	0.0900565	0.0918116	0.0924523	0.0915629	0.064837	0.0639726	0.0637595	0.0641935	0.0682859	0.0682781	0.0633705	0.0658302	0.0654216
269	0.0526979	0.0520364	0.052351	0.0389617	0.0377729	0.0374717	0.0482035	0.0459869	0.0472161	0.0890021	0.0879469	0.0886011	0.0905914	0.0910691	0.0903082	0.0635885	0.0628444	0.0628385	0.0629887	0.0671203	0.0675259	0.0623628	0.0643939	0.0643098
268	0.0521883	0.0513819	0.0519432	0.0382555	0.037184	0.0369674	0.0472536	0.045179	0.0460469	0.0875838	0.0870333	0.0874348	0.0890626	0.0893856	0.0890405	0.0622401	0.0616669	0.0615698	0.0619286	0.0659524	0.0665889	0.0612565	0.0634023	0.0636659
267	0.0516609	0.0509536	0.0511709	0.0377447	0.0368742	0.0361826	0.0461734	0.044183	0.0450179	0.086349	0.0856448	0.0863701	0.087871	0.0879623	0.0878456	0.0610154	0.0605306	0.0600066	0.0608599	0.0650177	0.0655131	0.0599366	0.0628033	0.0629015
266	0.0512679	0.0506965	0.0508099	0.0375224	0.0365812	0.0359739	0.0451999	0.0432367	0.0440202	0.0853367	0.0846112	0.0851836	0.0867197	0.0867985	0.0867185	0.0603108	0.059304	0.0590465	0.0599809	0.0640455	0.0647451	0.0591881	0.0622427	0.0618852
265	0.0506846	0.0499781	0.0502145	0.0372167	0.0362738	0.0358542	0.0441842	0.0422109	0.0429625	0.0838557	0.083131	0.083783	0.0852222	0.0856939	0.085179	0.0592978	0.0583475	0.0582115	0.0590147	0.0630191	0.0634853	0.0584673	0.061122	0.0608448
264	0.0499217	0.0489135	0.0491989	0.0369031	0.0356789	0.0354641	0.0430805	0.0413618	0.0419346	0.0823897	0.0812284	0.0825876	0.083803	0.084423	0.0835559	0.0581403	0.0571548	0.0567618	0.0580953	0.0618495	0.0622991	0.0576747	0.059713	0.0594921
263	0.0490999	0.0484827	0.0486589	0.0364565	0.0355299	0.0351507	0.0422035	0.0404613	0.0414433	0.0810252	0.0796811	0.0810891	0.0824731	0.0828132	0.0823556	0.0571449	0.0558765	0.0555444	0.0573278	0.0608024	0.0613817	0.0569964	0.0588299	0.0587905
262	0.048491	0.0478659	0.0483605	0.0363718	0.0353217	0.0350429	0.0413468	0.0397542	0.0407553	0.0798142	0.0788906	0.0799726	0.0814893	0.0816332	0.0812054	0.0563259	0.0551725	0.0550161	0.0566016	0.0601311	0.0608062	0.0564556	0.0579876	0.058006
261	0.0479489	0.0471289	0.0477226	0.0361347	0.0352633	0.0348595	0.0405917	0.0390568	0.0399929	0.0785076	0.0779106	0.078489	0.0803763	0.0805885	0.0799831	0.0555055	0.0543868	0.054144	0.0557348	0.0594059	0.0600881	0.0557165	0.0573394	0.0573469
260	0.0474818	0.0465012	0.0471099	0.035987	0.0352641	0.0349475	0.0398081	0.0384547	0.0391871	0.0773682	0.0767296	0.077286	0.0791672	0.0794775	0.078784	0.0547476	0.0533131	0.0533662	0.0550355	0.0585495	0.0589001	0.0551034	0.056407	0.0562937
259	0.046846	0.0460581	0.0467635	0.0358845	0.0350286	0.0347647	0.0392039	0.0380442	0.0385785	0.0759557	0.0753987	0.076281	0.0776534	0.0779119	0.0772167	0.0535464	0.0522889	0.0523888	0.0543436	0.0575737	0.0581028	0.0543526	0.055339	0.0555855
258	0.0459037	0.0451192	0.0456661	0.0357403	0.0345069	0.0343253	0.0386903	0.0372047	0.0377576	0.0743675	0.0738834	0.0745379	0.0761134	0.0761625	0.0758417	0.0525218	0.0510702	0.0511277	0.0533831	0.0565189	0.0569393	0.0535588	0.0543084	0.0545877
257	0.0449247	0.0442154	0.0445742	0.0355282	0.034474	0.0343783	0.0382572	0.0366417	0.0373005	0.0730986	0.0726747	0.0731956	0.0748998	0.0750815	0.0745868	0.0514757	0.0497925	0.0497182	0.0522022	0.0553532	0.0557445	0.052937	0.0533233	0.0532858
256	0.0441577	0.0434457	0.0438527	0.0354431	0.0344355	0.034226	0.0375618	0.0360966	0.0371064	0.0718684	0.0712827	0.0715231	0.0735124	0.0737639	0.0734021	0.0505747	0.0488804	0.0489192	0.0515943	0.0547285	0.0554375	0.0523785	0.0527085	0.0523867
255	0.0436646	0.0430121	0.0438085	0.0356034	0.0347083	0.0342147	0.0370857	0.0356136	0.0365474	0.0706826	0.0700211	0.0705801	0.0724684	0.0729953	0.0725663	0.049751	0.0484002	0.0485743	0.0509482	0.0539511	0.0544922	0.0518961	0.0520577	0.0518109
254	0.0432905	0.0430344	0.043435	0.0358065	0.0349469	0.0346053	0.0369537	0.0355416	0.0362449	0.0694535	0.0690867	0.0698745	0.0710794	0.0720722	0.0714403	0.0488559	0.047497	0.0477041	0.0504582	0.0530872	0.0538414	0.0518064	0.0513219	0.0511649
253	0.0427201	0.0424001	0.0427998	0.0362424	0.0350149	0.0347768	0.0367639	0.0354176	0.0363978	0.0680888	0.0675395	0.0684163	0.0696347	0.0705168	0.0699625	0.0479075	0.0465918	0.0464894	0.0499176	0.0521229	0.052771	0.0514731	0.0501305	0.0500301
252	0.0423577	0.0420837	0.0424304	0.0367193	0.0356094	0.0355577	0.0364775	0.0350269	0.0360084	0.0665047	0.0657139	0.0667077	0.0681072	0.068734	0.0682601	0.0463136	0.0456673	0.0454938	0.0485974	0.0511434	0.0513913	0.0503574	0.0492268	0.0491833
251	0.0422267	0.041811	0.0419886	0.0372791	0.0366905	0.0362154	0.0362712	0.0347542	0.0354702	0.0649211	0.0642968	0.0649497	0.0664917	0.0668856	0.0666551	0.0446031	0.0444697	0.044593	0.0471175	0.0501442	0.050305	0.0492879	0.0478665	0.0481466
250	0.0423304	0.0418902	0.0421091	0.0384312	0.037741	0.0374919	0.0363006	0.0347377	0.0354858	0.0629422	0.0624571	0.0632635	0.0645758	0.0650188	0.0644401	0.0424932	0.0435675	0.0435101	0.0453168	0.0486121	0.0491062	0.0480449	0.0468168	0.0469072
