# Supplementary material for: Coral anthozoan-specific opsins employ a novel chloride counterion for spectral tuning
Source: eLife. 2025 Sep 1;14:RP105451. doi: 10.7554/eLife.105451 (PMC12401545; doi:10.7554/eLife.105451)
Supplement: Figure 2—source data 1. [file elife-105451-fig2-data1.xlsx]

## Sheet: Sheet1
wavelength [nm]	A_curve1_Antho2a_WT_140Cl_dark	A_curve2_Antho2a_WT_140Cl_O56_2m	B_curve1_Antho2a_E292A_140Cl_dark	B_curve2_Antho2a_E292A_140Cl_O56_2m	C_curve1_Antho2a_WT_dark_0Cl	C_curve2_Antho2a_WT_dark_140Cl	D_curve1_Antho2a_E292A_dark_0Cl	D_curve2_Antho2a_E292A_dark_140Cl	wavelength [nm]	E_Antho2a_WT_dark_140Cl	E_Antho2a_WT_dark_140Br	E_Antho2a_WT_dark_140I	F_Antho2a_E292A_dark_140Cl	F_Antho2a_E292A_dark_140Br	F_Antho2a_E292A_dark_140I
750	-0.00043119	-0.00061721	0.000116194	4.5506e-05	-0.000332311	-0.000372455	-9.82313e-05	-1.67745e-06	650	0.0132476	0.000633102	0.00866055	-0.00545747	0.00257513	0.00587612
749	-0.0004795	-0.00085085	6.5153e-05	7.5937e-05	-0.000298575	-0.000304459	-3.78246e-05	3.44929e-05	649	-0.00143452	0.0151748	0.00464164	-0.0116996	0.00867734	0.012525
748	-0.00046152	-0.00083196	0.00015886	-2.2146e-05	-0.000173963	-0.000290909	1.88766e-05	-2.27094e-05	648	0.00209314	-0.00171579	0.00488071	-0.0349483	0.00617414	0.0212264
747	-0.00040821	-0.0007635	-7.6091e-05	-0.000157015	-0.000185268	-0.000199814	6.92424e-05	-1.16214e-05	647	-0.00280983	0.00538813	0.00815688	-0.0194007	-0.0134476	0.0049969
746	-0.0004996	-0.0008265	-0.000390177	-0.000244564	-0.000343421	-0.000133488	0.000100285	-2.75508e-06	646	-0.0129343	0.00927494	0.00912035	-0.0186174	-0.0119436	-0.00544371
745	-0.0002812	-0.00064445	-0.000225492	-0.000215421	-0.000277946	-0.000205223	2.42238e-05	5.91248e-05	645	-0.0219781	-0.0002528	0.0137107	-0.0226234	0.0117766	0.00182069
744	-0.00035024	-0.00063932	-0.000209177	6.3622e-05	-0.000257258	-0.000307914	-0.000109458	-1.5666e-05	644	-0.012964	-0.00817081	0.013771	0.00288385	-0.0134023	0.00911102
743	-0.00049534	-0.00087067	-0.000165383	0.000118999	-0.000172179	-0.000177242	-2.71562e-05	-0.000152387	643	-0.00526879	0.00326814	0.0242678	0.00136766	-0.0340748	0.0123673
742	-0.00042466	-0.00077918	-2.2654e-05	-5.9051e-05	-0.000110589	-7.77891e-05	0.000142124	-0.000129841	642	-0.00854634	0.0100886	0.0211496	0.0128739	-0.0176575	-0.00409817
741	-0.00043004	-0.00054094	-0.000145446	-3.8896e-05	-0.000235378	-0.000128732	0.000157822	8.16528e-05	641	0.00445679	0.0072024	0.0208664	0.00552014	-0.0175039	-0.0156062
740	-0.00035984	-0.00039138	-9.882e-05	4.4734e-05	-0.000185525	-7.71036e-05	5.07714e-05	5.4396e-05	640	0.0174778	0.00474119	0.0175834	-0.00954792	-0.00948801	-0.0216848
739	-0.00029807	-0.00027103	-5.6055e-05	1.5234e-05	-0.000340115	-0.00016244	-4.27986e-07	-0.000105996	639	0.000384369	0.00557758	0.010149	0.0240335	0.00400497	0.000513803
738	-0.00029236	-0.00023183	1.6785e-05	-3.3788e-05	-0.000188892	-0.000138567	1.17677e-05	-8.80231e-05	638	-0.00552768	-0.00133268	0.015886	0.0155462	-0.00631638	0.00510463
737	-0.00036799	-0.00028776	-0.000187874	-0.000211679	-6.16479e-05	-0.000116788	5.74254e-05	7.1667e-05	637	-0.00406605	-0.00518455	0.0237199	0.00296338	0.00624186	0.0098698
736	-0.0003422	-0.00035147	-5.8945e-05	-0.000242763	-6.80845e-05	-0.000207906	3.48356e-05	5.04597e-05	636	0.0124558	0.00784936	0.0189022	0.00404859	-0.00886159	-0.0125796
735	-0.00031792	-0.00066777	-7.122e-05	-4.6083e-05	-0.000124209	-0.000117079	2.01807e-05	-6.75234e-05	635	0.0105208	0.0123805	0.0216095	0.0118953	0.00429975	-0.0164873
734	-0.00043022	-0.00059741	-0.000235886	-0.000204472	-0.000131516	-7.7701e-05	3.21837e-05	-1.76442e-06	634	-0.00346768	0.0108499	0.00808265	0.0019006	0.0215162	0.0168064
733	-0.00042866	-0.00052772	-0.000150237	-6.7604e-05	-0.000292159	-0.000262556	-9.24289e-05	-7.89156e-05	633	-0.0123865	0.0104273	0.0117509	-0.000802713	0.0282217	0.034304
732	-0.00045386	-0.00053281	-0.000291698	6.4711e-05	-0.000346627	-0.000305953	-8.12632e-05	-0.000177994	632	-0.00179173	0.00297486	0.0209687	0.0213927	0.00520001	0.0187623
731	-0.00038837	-0.00046644	-0.000179776	0.000107199	-0.000232248	-0.000192266	-4.06613e-05	-7.69812e-05	631	0.0077791	-0.00256683	0.0327262	0.0124383	0.00282081	-0.000772218
730	-0.00014158	-0.00042288	-0.000154592	1.6263e-05	-0.000114092	-9.82188e-05	4.50711e-05	-4.14931e-05	630	0.02133	0.00681656	0.0377808	-0.000926494	-0.00297019	0.000267147
729	-0.0001884	-0.000205	-0.000196863	-8.9739e-05	-0.000195384	-0.000227684	4.55257e-05	-0.000114003	629	0.00946093	0.00777965	0.0215792	-0.00443079	-0.0126124	0.0161996
728	-0.00049231	-0.00050346	-4.9204e-05	5.9424e-05	-0.000365931	-0.000279202	-9.00573e-05	-9.6684e-05	628	0.0121521	0.00347956	0.0273653	-0.0111793	-0.0132859	0.0297972
727	-0.000676121	-0.00056027	9.982e-05	0.000188413	-0.000391687	-0.000301665	-0.000272461	-0.000276066	627	0.00108694	0.00798371	0.0253636	0.00583144	0.00836105	0.035835
726	-0.00052977	-0.0005139	2.6605e-05	-4.0183e-05	-0.000271766	-0.0001803	-0.000167252	-0.000164775	626	0.0145544	0.00948141	0.0218344	0.00235	0.00940561	0.0391223
725	-0.00036299	-0.00029896	-6.1658e-05	1.4402e-05	-0.000263412	-0.000113644	-6.52249e-05	4.92963e-05	625	0.00982714	0.0101458	0.0253081	0.00536478	0.0315358	0.0205117
724	-0.000610073	-0.00048244	7.6755e-05	0.000172693	-0.000219284	-8.73359e-05	-8.28109e-05	-8.46584e-05	624	0.0087108	0.0300724	0.0193455	-0.0180662	0.0437063	0.01334
723	-0.00028724	-0.00037178	-0.000186785	-5.9269e-05	-0.00023932	-0.000112765	-7.05336e-05	-0.00013635	623	0.0149562	0.0244016	0.0199728	-0.0105922	0.0313077	0.0113363
722	-0.00021244	-0.00048879	-0.000149643	-0.000166003	-0.000155431	-9.63289e-05	4.65552e-05	2.0632e-06	622	0.011399	0.014269	0.0289372	0.0130211	0.0280816	0.0367577
721	-0.00029438	-0.00075237	-0.000128557	8.4787e-05	-0.000364307	-0.000195916	-2.99701e-05	-0.00018325	621	0.0107289	0.0125792	0.026225	0.0281686	0.0365366	0.0228324
720	-0.00014332	-0.00049424	-3.1306e-05	0.000191303	-0.000323045	-0.000257007	-7.39816e-05	-0.000113185	620	0.0213745	0.00611249	0.0413355	0.0195257	0.0481281	0.0280236
719	-0.00019507	-0.00046137	-2.8237e-05	-5.9605e-05	-0.000146027	-0.000176165	-3.76472e-05	2.81752e-05	619	0.0102707	0.0134828	0.0423756	0.0192227	0.0273598	0.033379
718	-0.00034273	-0.00056892	4.484e-05	0.000106367	-0.000120151	-0.000214839	2.286e-06	-6.41544e-05	618	0.0121194	0.025367	0.0371189	0.0328899	0.0252923	0.033233
717	-0.00019709	-0.00041837	-4.7878e-05	0.000182057	-0.00016533	-0.00010432	-1.92937e-05	-2.95503e-05	617	0.00637691	0.0261087	0.0332904	0.0149194	0.0284899	0.00157688
716	-0.00024764	-0.00044423	0.00012344	0.000124839	-8.07521e-05	-0.00016217	-3.44621e-05	3.25426e-07	616	0.0223391	0.0198105	0.0308803	0.00455987	0.00919566	0.0172271
715	-0.00033681	-0.00046407	-7.5715e-05	-4.8221e-05	1.63421e-05	-0.00021541	-1.48812e-05	0.000103104	615	0.0159834	0.0087375	0.0302002	0.00890829	0.021478	0.0334572
714	-0.00028003	-0.00036822	-0.000123568	-0.000138998	-0.000105121	-0.00029025	-0.000110151	-5.95005e-07	614	0.00986582	0.00489293	0.0347274	0.0224331	0.0345991	0.00619914
713	-0.00043695	-0.00044106	-1.3309e-05	0.000122543	-0.000145312	-9.2637e-05	3.47947e-05	3.86639e-06	613	0.00574284	0.020191	0.0399006	0.0192625	0.0197442	0.041361
712	-0.00032337	-0.00047389	-4.2294e-05	4.6852e-05	-0.000228229	-0.000151416	-3.5906e-05	-5.12825e-05	612	0.0184334	0.0245857	0.0406388	0.0222776	0.0246315	0.0511352
711	-0.00050484	-0.00041809	0.000113383	0.000188175	-0.000102568	-0.000113577	-0.000139515	1.22262e-05	611	0.0281142	0.0288931	0.0530212	0.0242202	0.025233	0.0490748
710	-0.00037229	-0.00042916	0.000128667	0.000197421	-2.78687e-05	3.51999e-05	2.13113e-05	0.000163359	610	0.0233155	0.0285024	0.0591786	0.0280751	0.0188822	0.0547535
709	-0.00038276	-0.00017061	1.6785e-05	6.8552e-05	-0.000108174	2.14277e-05	6.31662e-05	3.97941e-05	609	0.0202523	0.0265816	0.0579275	0.00941011	0.0450875	0.0527805
708	-0.00016351	-0.00019152	0.000189667	0.000286357	-0.000143532	-5.92217e-05	3.41218e-05	2.00779e-05	608	0.0197134	0.0214332	0.060221	0.0118957	0.0736541	0.0703498
707	-0.00014991	-0.00018653	-6.4885e-05	0.000148261	-0.000146126	-0.000107637	-3.74122e-05	-4.05267e-05	607	0.0232232	0.0312421	0.0733601	0.0216772	0.0598646	0.0948988
706	-0.00016781	-6.22302e-05	-0.000197239	2.2421e-05	-0.000209977	-0.000223417	-0.000175864	-8.0254e-05	606	0.0286175	0.0467892	0.072898	0.0196942	0.0582802	0.0531382
705	-0.00021778	-0.00021702	8.901e-05	0.000235395	-0.000151036	-0.000139223	-9.84731e-05	6.63391e-05	605	0.0390457	0.0320506	0.0620622	0.0419908	0.0493538	0.0462282
704	-0.00014936	-0.00034209	-5.3659e-05	0.00018471	-0.000194771	-0.00010181	-2.24241e-05	0.00013223	604	0.0139443	0.0323295	0.0625937	0.0527593	0.0554279	0.0786854
703	0.0001127	-0.00019031	8.0319e-05	0.000159131	-7.09093e-05	-0.000155971	3.3504e-05	9.21361e-06	603	0.0158046	0.0320455	0.0739498	0.0421107	0.0749935	0.0949462
702	8.644e-05	-0.00025574	0.000304044	0.000186869	-7.51086e-05	-3.1611e-05	-1.60887e-05	-3.58632e-05	602	0.0332109	0.0439746	0.0696894	0.0336899	0.0738283	0.118325
701	-0.00011653	-0.00028782	7.5409e-05	0.000205638	-8.91638e-05	-0.000111069	7.78161e-05	6.03345e-05	601	0.0395961	0.0507427	0.0910731	0.0144836	0.0771939	0.134832
700	-4.478e-05	-0.00012883	-5.9896e-05	0.000217655	3.14463e-05	-9.69204e-05	0.00014848	0.000189157	600	0.035786	0.0645802	0.0974349	-0.00538176	0.0821932	0.136621
699	-1.758e-05	-0.00015006	-0.000145386	0.000156557	-3.31358e-05	-0.000132038	7.83308e-05	0.000126225	599	0.0420346	0.0709627	0.0904741	0.0263806	0.0934459	0.119571
698	0.00017655	-0.00015315	-0.000163205	0.000178771	-6.18843e-05	-0.000131769	6.3679e-05	8.06192e-05	598	0.0370777	0.0638986	0.108055	0.0398302	0.102991	0.11674
697	-4.674e-05	-0.00022769	-6.4726e-05	0.000252659	-0.000103795	-0.000102841	0.000129431	0.00019024	597	0.0357707	0.0637867	0.117354	0.038292	0.109509	0.152487
696	-7.903e-05	-0.00038992	-2.9445e-05	0.00023884	-2.50556e-05	-0.000152667	0.000155681	0.000137466	596	0.0499855	0.0659985	0.109982	0.0531824	0.0768038	0.174588
695	1.786e-05	-0.00030421	-0.000125231	-6.5862e-05	1.49583e-05	-6.00997e-05	8.11416e-05	0.000174115	595	0.04491	0.0701143	0.117904	0.0357716	0.0964682	0.168279
694	-1.182e-05	-0.00034751	-8.502e-05	4.606e-05	-5.5389e-05	1.02515e-05	3.99644e-05	0.000131944	594	0.0541474	0.078147	0.129575	0.0700857	0.109042	0.172402
693	0.0001652	-0.00013394	-2.0278e-05	0.000277309	-0.000139811	-0.000156277	-6.78476e-06	6.74189e-05	593	0.0630602	0.0942985	0.137577	0.0885544	0.107071	0.18973
692	-2.43e-06	1.4402e-06	-0.000256239	0.000155507	-0.000171273	-0.000303004	-5.63577e-06	2.02768e-05	592	0.0699906	0.0929721	0.140486	0.061621	0.122414	0.154811
691	5.102e-05	0.00023641	-4.1166e-05	0.000122285	-0.00014555	-5.57678e-05	6.66104e-05	0.000186017	591	0.0790999	0.109044	0.159306	0.0653293	0.136602	0.187832
690	0.00034498	0.00063906	-3.0356e-05	0.000204568	-9.23355e-05	-2.51187e-05	0.000110048	0.000131433	590	0.0848629	0.127651	0.168456	0.093704	0.142703	0.212586
689	0.00035911	0.00060166	0.000223938	0.000252303	-0.000151648	-8.15029e-05	8.36786e-05	0.000100374	589	0.0936507	0.119182	0.171698	0.110705	0.161918	0.216495
688	4.566e-05	0.00041256	0.000198675	0.000401147	-2.02481e-05	-5.82957e-05	0.000184455	0.000193297	588	0.106708	0.130352	0.186815	0.105681	0.153855	0.21094
687	-0.00011808	0.00042666	5.3769e-05	0.000492147	0.000186353	1.42982e-05	0.00026224	0.000342972	587	0.101763	0.139115	0.197797	0.122393	0.174115	0.229074
686	-9.457e-05	0.00041844	0.000213366	0.000436427	9.99517e-05	1.56344e-06	0.000272182	0.000326389	586	0.0897455	0.138197	0.20646	0.121042	0.187487	0.242969
685	-3.554e-05	0.0005342	0.000352234	0.000447897	0.00013852	-4.89233e-05	0.000171347	0.000203921	585	0.106654	0.154421	0.223137	0.125737	0.185616	0.236947
684	1.483e-05	0.00053343	0.000292877	0.000310507	3.22397e-05	-0.000108517	4.75865e-05	0.000115246	584	0.119469	0.155344	0.224435	0.131922	0.197179	0.249092
683	0.00013992	0.00030604	0.000360569	0.000213933	7.3618e-05	-3.58741e-05	8.1598e-05	0.000110385	583	0.122402	0.159856	0.229691	0.135097	0.211664	0.277285
682	-0.00033277	8.98399e-05	0.000476886	0.000213696	7.07514e-05	8.68963e-05	0.000160438	0.0002675	582	0.133291	0.169597	0.247846	0.15113	0.228204	0.285766
681	-0.00033442	0.00031933	0.000311053	0.000353037	1.917e-05	8.69356e-05	7.97967e-05	0.00022682	581	0.160858	0.179431	0.253007	0.163872	0.21875	0.307302
680	-0.0004227	1.027e-05	0.000280978	0.000412967	-2.57085e-05	-8.43183e-05	5.02783e-05	0.000139511	580	0.154395	0.195426	0.261182	0.166818	0.243357	0.344101
679	-0.00030632	-0.00037364	0.000377101	0.000352607	1.08563e-05	-8.57093e-05	1.44997e-05	0.000108009	579	0.142651	0.210112	0.270567	0.178672	0.249759	0.337766
678	3.045e-05	-7.25902e-05	0.000195844	0.000359807	-2.7039e-05	9.09181e-05	5.64943e-05	0.000223988	578	0.158625	0.219421	0.287103	0.172946	0.23909	0.342844
677	6.906e-05	-8.66802e-05	9.1465e-05	0.000411427	-4.87987e-05	0.000150978	-6.76201e-06	0.000255155	577	0.167594	0.222344	0.296114	0.188854	0.272543	0.350534
676	-5.12e-06	1.93998e-05	0.000231244	0.000337437	-0.000111162	3.24923e-05	-0.000186829	0.000100021	576	0.180017	0.24671	0.310864	0.214357	0.278948	0.355202
675	-0.00016627	-6.33799e-05	0.000126351	0.000239751	-3.49749e-05	-5.6381e-05	-5.22384e-05	9.12889e-05	575	0.183717	0.263068	0.319763	0.208576	0.290248	0.35348
674	-7.341e-05	3.02502e-05	8.0655e-05	0.00019754	-2.81438e-05	-7.27465e-05	4.28695e-05	9.58641e-05	574	0.193392	0.270737	0.340081	0.233559	0.296769	0.345524
673	-3.522e-05	0.00022202	0.00019137	0.000127809	3.00416e-05	-8.44071e-05	0.000127175	0.000156804	573	0.203531	0.268664	0.356019	0.25333	0.313303	0.372583
672	-1.914e-05	0.00021505	0.000239758	4.6971e-05	2.28172e-05	-0.000124645	0.000105534	0.000132562	572	0.214689	0.275102	0.361247	0.262027	0.328806	0.415487
671	0.00015778	0.00011627	0.000192577	0.000309427	5.09713e-05	3.87407e-05	0.000161825	0.000250848	571	0.238034	0.291992	0.373253	0.2651	0.336965	0.431533
670	6.29e-05	9.54302e-05	0.000216613	0.000521087	-2.45043e-05	-7.71286e-05	0.000118959	0.000241827	570	0.256723	0.308124	0.390562	0.25719	0.373813	0.453763
669	-6.775e-05	9.60602e-05	0.00011564	0.000352817	-7.28696e-05	-6.07148e-06	0.000160024	0.000167691	569	0.273796	0.318745	0.408784	0.280496	0.382756	0.468782
668	1.04201e-05	0.00027563	7.5013e-05	0.000464837	-1.11849e-07	2.94779e-05	0.000210308	0.000122988	568	0.275778	0.346365	0.431876	0.303532	0.388838	0.47403
667	5.338e-05	0.00023109	0.000208396	0.000473337	4.21001e-05	-0.000103657	0.000269743	0.000196332	567	0.264894	0.366192	0.451995	0.306928	0.392079	0.488639
666	-6.614e-05	0.00019757	0.000307489	0.000396837	6.34063e-05	-1.94464e-05	0.000295996	0.00028582	566	0.286742	0.365759	0.460694	0.314786	0.426299	0.513243
665	5.455e-05	0.00034441	0.000329149	0.000509667	8.74982e-05	7.59409e-05	0.000231535	0.000267344	565	0.30327	0.370332	0.458612	0.330661	0.44668	0.520549
664	0.00028431	0.00026542	1.1083e-05	0.000272102	1.2243e-05	-2.63884e-06	6.9223e-05	0.000291761	564	0.306213	0.396051	0.47101	0.359259	0.445942	0.535727
663	0.00026172	0.00029478	4.6701e-05	0.000358087	-7.41572e-05	-5.7065e-05	0.000138199	0.000204253	563	0.335638	0.411618	0.496222	0.373886	0.449148	0.535196
662	0.00035452	0.00036196	2.8763e-05	0.000184295	2.31147e-05	2.65556e-05	0.000174218	0.000322274	562	0.348069	0.419332	0.523799	0.384236	0.466413	0.579067
661	0.00014814	0.00018612	0.000233422	0.000408157	1.39501e-06	5.26004e-05	8.6035e-05	0.00021437	561	0.359363	0.445228	0.519274	0.404373	0.484372	0.580794
660	7.255e-05	9.52099e-05	5.4877e-05	0.000371297	-4.19422e-05	-3.08854e-05	-8.34022e-05	0.000192088	560	0.375338	0.472577	0.537074	0.423207	0.510773	0.599764
659	-3.55e-05	-5.03898e-05	0.000175709	0.000475557	-1.61057e-05	-7.53893e-05	-3.10956e-05	0.000290333	559	0.401642	0.490413	0.562705	0.431441	0.519792	0.619464
658	0.00033296	0.00030337	0.000365816	0.000543937	-3.09578e-05	9.23794e-06	0.000144956	0.000299001	558	0.404761	0.496268	0.574479	0.4575	0.518675	0.628145
657	0.00041172	0.00045624	0.000350135	0.000354697	0.000159901	6.73403e-05	0.000235671	0.000423929	557	0.427067	0.506679	0.588463	0.467605	0.55299	0.645739
656	0.00021747	0.00030131	0.000179609	0.000261846	2.9129e-05	5.63605e-05	0.000111809	0.000356767	556	0.435816	0.524282	0.60202	0.481276	0.559584	0.630628
655	0.00011618	0.00022913	0.000119005	0.000306747	5.7546e-05	0.000130013	0.000151509	0.000387897	555	0.445804	0.536524	0.613462	0.484496	0.592952	0.62705
654	3.237e-05	0.00048902	0.000312537	0.000551637	7.17385e-05	-4.45217e-05	2.90716e-05	0.000341589	554	0.464318	0.55653	0.631275	0.483042	0.603588	0.665013
653	4.528e-05	0.00044372	0.000460018	0.000638877	0.000209338	2.44184e-05	4.50879e-05	0.000403866	553	0.469349	0.566593	0.65542	0.478964	0.60989	0.681315
652	-1.635e-05	0.00019155	0.00042927	0.000496757	0.000204229	0.000117978	0.000122622	0.000546348	552	0.485716	0.582914	0.662605	0.522523	0.636722	0.709975
651	-6.236e-05	0.00020566	0.000306222	0.000436277	3.39197e-05	7.81389e-05	0.000117333	0.000442365	551	0.49787	0.604313	0.671149	0.553161	0.635382	0.727114
650	0.00014897	0.00041684	0.00027003	0.000460807	-0.000109797	-0.000112168	2.83199e-05	0.000199831	550	0.514773	0.618138	0.676989	0.557175	0.667705	0.731628
649	0.0003309	0.00050983	0.000273455	0.00022011	3.87937e-05	0.000104384	0.000172814	0.000392758	549	0.532012	0.618176	0.710049	0.577765	0.672584	0.770305
648	0.00044599	0.00045176	0.000219959	0.000303287	6.77585e-05	8.39007e-05	7.97185e-05	0.000463878	548	0.564356	0.635758	0.729239	0.610893	0.679285	0.770045
647	0.00048931	0.00058414	0.000454672	0.000514957	-2.55896e-05	-0.000127434	0.00011714	0.000345943	547	0.586525	0.6673	0.72645	0.622947	0.687916	0.77945
646	0.00052875	0.00051043	0.000503813	0.000491157	-1.68994e-05	-4.36194e-05	0.000143964	0.00037571	546	0.606143	0.687177	0.739703	0.640979	0.70707	0.796096
645	0.00030587	0.00048922	0.000262249	0.000372777	-0.000102432	-9.65552e-06	2.82158e-06	0.000329355	545	0.619271	0.693935	0.766462	0.637552	0.742005	0.799886
644	0.0002028	0.00070726	0.00033093	0.000449137	-0.000139869	4.83325e-05	9.12006e-05	0.00029161	544	0.641726	0.705745	0.778969	0.645994	0.744591	0.805375
643	0.00029483	0.00050908	0.00051981	0.000540847	-0.000161391	9.0834e-05	5.16219e-05	0.00019123	543	0.650803	0.719814	0.789359	0.66241	0.745132	0.796853
642	0.00036871	0.00046437	0.000388327	0.000575277	-0.000163292	-4.85551e-07	4.91677e-05	0.000225873	542	0.669855	0.751709	0.805934	0.671907	0.749984	0.805251
641	0.00028419	0.00059019	0.000388802	0.000577697	1.31518e-05	4.89709e-05	6.05518e-05	0.000365745	541	0.678619	0.767335	0.816499	0.710174	0.759079	0.828441
640	0.0003507	0.00063989	0.000261536	0.000384277	8.3283e-05	0.000122398	5.10697e-05	0.000409368	540	0.686687	0.769617	0.8199	0.731186	0.774637	0.86621
639	0.0003739	0.00065969	0.000333504	0.000505707	5.91057e-05	0.000128583	0.000100922	0.000433827	539	0.704149	0.782917	0.828535	0.746383	0.796124	0.853326
638	0.00033785	0.00064619	0.000451405	0.000603277	-5.1446e-05	0.000124533	0.000206807	0.000417614	538	0.72596	0.785311	0.838279	0.740043	0.830412	0.856947
637	0.00030742	0.00055008	0.000363578	0.000491947	3.3786e-05	0.000279931	0.000275446	0.000404108	537	0.750122	0.793361	0.854005	0.753412	0.84269	0.865053
636	0.00031882	0.00042973	0.000472828	0.000493507	0.000119928	0.000196693	0.000287208	0.000426418	536	0.751143	0.823213	0.86538	0.787887	0.838501	0.876285
635	0.00030956	0.00055052	0.0005345	0.000472697	2.06996e-05	0.00023985	0.000200133	0.000476068	535	0.769745	0.839591	0.876081	0.797228	0.850968	0.88921
634	0.00017898	0.00066222	0.000544915	0.000521247	2.33523e-05	0.000279405	0.000122106	0.00050486	534	0.789179	0.838628	0.881667	0.803243	0.839839	0.903895
633	0.00025889	0.00077965	0.000401928	0.000503547	0.000119452	0.000237189	0.000237495	0.000556052	533	0.807731	0.849462	0.898316	0.790968	0.839721	0.886512
632	0.00033876	0.00074674	0.000318754	0.000518677	0.000126718	6.82184e-05	0.000163585	0.000383807	532	0.826408	0.866005	0.90228	0.808214	0.875103	0.912789
631	0.00053752	0.00069428	0.000353382	0.000534907	9.76947e-05	-3.7814e-06	4.87715e-05	0.000375551	531	0.823485	0.878643	0.900371	0.819126	0.884041	0.916785
630	0.00041659	0.00062914	0.000251102	0.000523707	0.000125608	0.000180896	0.000139488	0.000454618	530	0.843052	0.907507	0.907518	0.850066	0.901609	0.950187
629	0.00064659	0.00071665	0.000426934	0.000549737	5.79161e-05	0.000211409	0.000168119	0.00037709	529	0.853872	0.90735	0.915069	0.876355	0.91074	0.968116
628	0.00064457	0.00082247	0.000540796	0.000684587	5.54058e-05	0.000209805	0.000167722	0.000431916	528	0.859371	0.907286	0.922626	0.885274	0.905983	0.957141
627	0.00051243	0.00077529	0.000476649	0.000752897	2.49345e-05	0.000263674	0.000240068	0.000606759	527	0.864515	0.917149	0.926937	0.888204	0.93248	0.953972
626	0.00058375	0.00095015	0.000577365	0.000834187	-1.28397e-05	0.000195543	0.000214884	0.000569998	526	0.872522	0.909032	0.935841	0.888617	0.918556	0.945892
625	0.00063507	0.00081519	0.000625119	0.000612757	7.40964e-05	0.000290361	0.00021005	0.000532294	525	0.894075	0.929516	0.95293	0.890672	0.916891	0.94417
624	0.00054892	0.00094348	0.000677546	0.000585277	7.0314e-05	0.000177729	0.000144994	0.000504247	524	0.91269	0.935949	0.96476	0.90123	0.940368	0.971548
623	0.00075346	0.00099951	0.000784162	0.000738817	2.95074e-05	0.000138459	0.000148061	0.000646573	523	0.91486	0.950615	0.969092	0.916637	0.944625	0.961204
622	0.00062259	0.00082037	0.000799545	0.000753887	3.5034e-05	0.000208018	0.000142281	0.000610984	522	0.911137	0.952787	0.966636	0.918561	0.953535	0.99111
621	0.00060131	0.0008863	0.000948332	0.000563257	2.40823e-05	0.000187383	1.56857e-05	0.000618001	521	0.932246	0.95268	0.967332	0.928454	0.97028	0.996945
620	0.0007363	0.00107006	0.000747356	0.000721787	0.000117272	0.00022749	0.000175602	0.000521797	520	0.944007	0.960954	0.974929	0.941868	0.977433	0.988992
619	0.00083935	0.00108395	0.000686752	0.000738497	0.000224782	0.000328131	0.000130222	0.000616549	519	0.941501	0.963942	0.976717	0.946265	0.958366	0.988061
618	0.00081729	0.00101086	0.000653807	0.000598167	0.000255135	0.00048529	0.000123015	0.000836689	518	0.952411	0.967595	0.986471	0.930975	0.961472	1
617	0.00070527	0.0009951	0.000503258	0.000681377	0.000215677	0.000607118	0.00027794	0.000776588	517	0.956778	0.965597	0.98798	0.952983	0.988177	0.999424
616	0.00058771	0.00120504	0.000810415	0.000923397	0.000179738	0.0004079	0.000280358	0.000556688	516	0.94966	0.983687	0.991686	0.983772	0.979446	0.979704
615	0.00102589	0.00150624	0.000761948	0.000955417	0.000130917	0.000321728	0.000358247	0.000749924	515	0.973464	0.987763	0.986972	0.961065	0.968821	0.986569
614	0.0012452	0.00129626	0.000621714	0.000786467	0.000193162	0.000344875	0.000230065	0.000858971	514	0.985645	0.988704	0.986436	0.969714	0.975474	0.982204
613	0.00124635	0.00117233	0.000628524	0.000743247	0.000281743	0.000439117	0.00025086	0.00091465	513	0.976336	0.995528	0.997066	0.983221	0.969188	0.967135
612	0.00108879	0.00118291	0.000558972	0.000926267	0.000274871	0.000572844	0.000358761	0.000975544	512	0.989545	0.989632	1	0.979122	0.994207	0.976796
611	0.00113308	0.00131132	0.000661053	0.000879407	0.000200668	0.000495167	0.000238958	0.000763278	511	0.981358	0.991572	0.990931	0.990579	0.990821	0.967689
610	0.00128458	0.00150321	0.00070863	0.000959807	0.000311657	0.000560459	0.000192987	0.000798562	510	0.985976	0.999617	0.993968	0.981674	0.983999	0.95772
609	0.00114423	0.00136403	0.000894223	0.0010336	0.00028661	0.000550999	0.000130323	0.000945913	509	0.994731	0.994845	0.978475	0.982047	0.992701	0.96672
608	0.00098796	0.00122274	0.000998047	0.000989347	0.000238385	0.000660752	0.000139212	0.00100625	508	0.990781	0.99966	0.987794	0.97452	0.996231	0.947314
607	0.00116038	0.00135169	0.000842112	0.000941197	0.000238384	0.0007155	0.000141194	0.000898744	507	0.981784	0.995812	0.997416	0.976338	1	0.967074
606	0.00150237	0.00147232	0.00105948	0.0010163	0.000281286	0.000731212	0.000196312	0.000826941	506	0.986369	0.989915	0.995948	0.994967	0.993586	0.966149
605	0.00139373	0.00139406	0.000989197	0.000845017	0.000201498	0.000608192	0.000158338	0.000920329	505	0.989605	0.997895	0.993041	0.997146	0.987747	0.977319
604	0.00157762	0.00154887	0.00115271	0.000994657	0.000189004	0.000450422	2.04007e-05	0.000954951	504	0.989479	0.997808	0.982268	0.993665	0.99661	0.960592
603	0.00155006	0.00165079	0.00110413	0.000965767	0.000313518	0.000547107	3.2161e-05	0.00105436	503	0.995579	0.997487	0.971825	1	0.995712	0.952665
602	0.00139914	0.00153443	0.00117331	0.000924167	0.000325816	0.000811787	0.000323519	0.00121326	502	0.990959	0.992399	0.9804	0.999039	0.997037	0.945611
601	0.00128151	0.00145805	0.00128085	0.000959157	0.000208742	0.000687542	0.000279089	0.00112905	501	0.995921	1	0.967249	0.990459	0.977315	0.932276
600	0.00151848	0.00162438	0.00118707	0.00103291	0.000224245	0.0006494	0.000143628	0.00111897	500	0.994382	0.996731	0.9674	0.992588	0.98824	0.966519
599	0.00149053	0.00156508	0.00138745	0.00131565	0.000335835	0.000881941	0.000172079	0.00137149	499	0.98433	0.98408	0.965842	0.973742	0.989128	0.953184
598	0.00154929	0.00143269	0.0014746	0.00123185	0.000350282	0.00103796	0.000331218	0.001444	498	0.999116	0.987758	0.964128	0.969625	0.97285	0.950766
597	0.0017996	0.00173222	0.00148507	0.00107235	0.000369789	0.000965209	0.000240856	0.00141543	497	1	0.976234	0.957205	0.962863	0.965853	0.94717
596	0.00205796	0.00200348	0.00158474	0.00131991	0.000312649	0.000954519	0.000194886	0.00146659	496	0.982707	0.962166	0.952949	0.955927	0.961787	0.924582
595	0.00216936	0.00204375	0.00178015	0.00137228	0.000426413	0.00102948	0.000243416	0.00161121	495	0.977033	0.967605	0.957632	0.957118	0.953404	0.904392
594	0.00205396	0.00193767	0.00203112	0.00148462	0.000446051	0.00110934	0.000234838	0.00177677	494	0.986693	0.974682	0.945911	0.98058	0.962098	0.905528
593	0.00189602	0.00174157	0.00195707	0.00152995	0.000411189	0.00125715	0.000308035	0.00193355	493	0.992939	0.95642	0.935219	0.946091	0.955361	0.882175
592	0.0021466	0.00184699	0.0015401	0.00120777	0.000385646	0.00133157	0.00026153	0.00188785	492	0.975851	0.954736	0.930601	0.919024	0.901705	0.88729
591	0.00208065	0.00171721	0.00165708	0.00115396	0.000447775	0.00156394	0.000248738	0.00193127	491	0.969365	0.964049	0.913864	0.947501	0.90376	0.891204
590	0.00233646	0.00193072	0.00190081	0.00130185	0.00053893	0.00158029	0.000351734	0.00211537	490	0.954885	0.94951	0.910422	0.921683	0.918028	0.918328
589	0.00242645	0.00189984	0.00227165	0.00151982	0.000641959	0.00171267	0.000365765	0.00229387	489	0.9554	0.935092	0.909471	0.918063	0.911415	0.889254
588	0.00234551	0.00191407	0.00241496	0.00148875	0.00063204	0.00165158	0.000306767	0.00235672	488	0.962428	0.927637	0.897708	0.919487	0.891685	0.866537
587	0.00262305	0.00207442	0.00231131	0.00140251	0.000701692	0.00179917	0.000316235	0.00256676	487	0.953998	0.917782	0.882916	0.923083	0.893169	0.864477
586	0.00302879	0.00203556	0.00232925	0.0011219	0.000709158	0.00186288	0.000364361	0.00264462	486	0.946758	0.919951	0.887253	0.928925	0.900629	0.868272
585	0.00309038	0.00203875	0.00248643	0.00135416	0.000880908	0.00188721	0.000419758	0.00275866	485	0.940581	0.915276	0.874648	0.900088	0.91264	0.864724
584	0.00322911	0.00203534	0.00263791	0.00168229	0.00074727	0.00202723	0.000440034	0.00282419	484	0.936318	0.896969	0.868602	0.87644	0.92591	0.830528
583	0.00339989	0.00212849	0.00264969	0.00163986	0.00076574	0.00209659	0.000496277	0.00299393	483	0.915167	0.878613	0.873812	0.883562	0.907849	0.805856
582	0.00338486	0.00203724	0.00279385	0.00135367	0.00079245	0.00218848	0.00039121	0.00298753	482	0.907841	0.870125	0.852076	0.849465	0.866458	0.804453
581	0.00345329	0.00203508	0.00298191	0.00151647	0.000895698	0.00235064	0.000285208	0.00315088	481	0.926497	0.878081	0.844974	0.849581	0.839262	0.808207
580	0.00361869	0.0020744	0.00298445	0.00166692	0.000859765	0.0023939	0.000182038	0.00321172	480	0.922609	0.85624	0.837922	0.850167	0.856643	0.799511
579	0.00363296	0.00210333	0.00331473	0.0015986	0.000986911	0.00248258	0.000306611	0.00337928	479	0.921133	0.842724	0.835259	0.837896	0.863508	0.801901
578	0.00394039	0.00219363	0.00335694	0.00155993	0.00112972	0.00272997	0.000406156	0.00369828	478	0.888327	0.83294	0.830246	0.834655	0.840631	0.817971
577	0.00411945	0.00249057	0.00353812	0.00161228	0.00107601	0.00292944	0.00037737	0.00393939	477	0.878766	0.828147	0.805668	0.830329	0.826573	0.819504
576	0.00461003	0.00261879	0.00365107	0.00183448	0.00102922	0.00290264	0.000214287	0.00396031	476	0.858181	0.818495	0.791145	0.809045	0.822876	0.801021
575	0.00452733	0.0024011	0.00387359	0.00190823	0.00107484	0.00314055	0.000303957	0.00426512	475	0.848065	0.802047	0.785535	0.797331	0.812498	0.787728
574	0.00458441	0.00251961	0.00413392	0.00216616	0.00113665	0.0033631	0.000296651	0.0044486	474	0.845713	0.792457	0.779675	0.788589	0.80139	0.750482
573	0.00505932	0.00276619	0.00423879	0.00210972	0.00127221	0.0035058	0.000299799	0.00463684	473	0.823651	0.788653	0.761458	0.784219	0.81241	0.740925
572	0.00547374	0.00288151	0.00457139	0.0022492	0.00139548	0.00364755	0.000386162	0.00486559	472	0.814512	0.788626	0.753826	0.76663	0.784678	0.743698
571	0.00553346	0.00292943	0.0046081	0.00230446	0.00150265	0.0038671	0.000449574	0.00512757	471	0.807597	0.769508	0.741758	0.743981	0.753814	0.710349
570	0.00576288	0.00299631	0.00473027	0.00233265	0.00157109	0.00421054	0.000402316	0.00533555	470	0.807948	0.752821	0.740731	0.741515	0.758614	0.692358
569	0.00612896	0.00305495	0.00500342	0.00248352	0.00177401	0.00434427	0.000459552	0.00558856	469	0.791337	0.749151	0.739185	0.753958	0.768236	0.713681
568	0.00613415	0.00313254	0.00496867	0.00246334	0.00168622	0.00436996	0.000440668	0.00581184	468	0.777512	0.750395	0.7232	0.756627	0.762525	0.709572
567	0.00639501	0.00307053	0.0052432	0.00274199	0.00166288	0.0044884	0.000486302	0.00585507	467	0.769418	0.735271	0.710021	0.720849	0.750606	0.672969
566	0.00674826	0.00337056	0.00529806	0.00272336	0.00174239	0.00472511	0.00038517	0.00598554	466	0.762419	0.714884	0.701312	0.697356	0.741151	0.675743
565	0.00683651	0.00359361	0.00551232	0.00283801	0.00174795	0.00496529	0.000357038	0.00619005	465	0.742801	0.69776	0.689561	0.70772	0.738125	0.652929
564	0.00723772	0.00380728	0.00592532	0.00293457	0.00206673	0.00522538	0.00053689	0.00661526	464	0.736285	0.710042	0.687746	0.68697	0.745141	0.660168
563	0.00766393	0.00404249	0.00613857	0.00297391	0.0021071	0.00543498	0.000539461	0.00688157	463	0.725151	0.694458	0.675842	0.665295	0.708229	0.653053
562	0.00753447	0.00386385	0.00618651	0.00306306	0.00212781	0.00555828	0.00060874	0.00721034	462	0.716792	0.674193	0.669037	0.659595	0.688611	0.634873
561	0.00779874	0.00386001	0.00636525	0.0029805	0.00226401	0.00581049	0.000552256	0.00736661	461	0.697275	0.669686	0.657864	0.653465	0.661438	0.603407
560	0.0080228	0.00389752	0.0067434	0.00328301	0.00224373	0.00601612	0.00049773	0.00761833	460	0.689316	0.662545	0.64538	0.633404	0.673305	0.613166
559	0.00852154	0.00418005	0.00689164	0.00358696	0.00229679	0.00636666	0.000440566	0.00797402	459	0.689628	0.649984	0.63985	0.627779	0.69417	0.621169
558	0.00890894	0.00450802	0.00728058	0.00365625	0.00238854	0.00669119	0.000371885	0.00816722	458	0.679491	0.626479	0.624618	0.627633	0.673425	0.628895
557	0.00930634	0.00460566	0.00736542	0.003742	0.00258099	0.00695488	0.000506517	0.00850413	457	0.681912	0.623829	0.614154	0.608892	0.664115	0.60464
556	0.00953374	0.00469476	0.0077169	0.00387643	0.00261753	0.00719986	0.000482085	0.00865648	456	0.650818	0.607302	0.615442	0.576533	0.666074	0.611457
555	0.00980824	0.00503096	0.00768479	0.0036969	0.00281561	0.00737449	0.000358285	0.00882299	455	0.644974	0.593705	0.605361	0.582012	0.667702	0.629582
554	0.0100813	0.00492256	0.00795995	0.00389663	0.00282734	0.00748618	0.000275147	0.0090195	454	0.62424	0.581563	0.600516	0.575956	0.649946	0.632951
553	0.0101901	0.0048363	0.00802095	0.0039489	0.00274662	0.00777666	0.000325832	0.00932606	453	0.633233	0.587482	0.594741	0.579237	0.663043	0.587526
552	0.0104864	0.00521245	0.00849545	0.00434238	0.00308424	0.00811422	0.00049171	0.00963832	452	0.634859	0.584419	0.578654	0.557189	0.667878	0.597367
551	0.0106384	0.00541943	0.0088934	0.00438532	0.0031634	0.0084059	0.00049335	0.00994578	451	0.616208	0.571169	0.575995	0.520878	0.64771	0.593669
550	0.0111324	0.00556353	0.00897572	0.00465282	0.00305742	0.00855008	0.000412334	0.0102009	450	0.600916	0.562306	0.576285	0.538124	0.656436	0.563523
549	0.0116492	0.00577573	0.00910422	0.00500601	0.00335503	0.00877801	0.000568708	0.0105748	449	0.607146	0.549824	0.548463	0.536781	0.626596	0.553677
548	0.0119498	0.00619223	0.00929644	0.00484467	0.00339801	0.00909909	0.000576705	0.0108163	448	0.589524	0.549655	0.542415	0.509794	0.624304	0.544422
547	0.0121122	0.00647683	0.00965957	0.00499714	0.00336176	0.00930504	0.000505588	0.011024	447	0.575943	0.536905	0.53942	0.483242	0.617722	0.533344
546	0.0124882	0.00665413	0.00995659	0.00537345	0.00367934	0.00952565	0.000612994	0.011327	446	0.570834	0.519604	0.540987	0.485825	0.611412	0.524187
545	0.0128038	0.00691343	0.00993689	0.00552315	0.00380519	0.00986256	0.000529028	0.011621	445	0.559576	0.510979	0.540845	0.479814	0.631113	0.526262
544	0.0131499	0.00713933	0.0101548	0.0056793	0.00371303	0.0100844	0.000439221	0.0118796	444	0.545069	0.497343	0.5285	0.483873	0.630815	0.534461
543	0.0132894	0.00713633	0.0105992	0.0058818	0.0039676	0.0104774	0.000559854	0.0122022	443	0.527559	0.502546	0.517723	0.46271	0.616072	0.510493
542	0.013642	0.00741253	0.0107292	0.00605959	0.0040723	0.0105529	0.000474543	0.0123161	442	0.522894	0.505047	0.508289	0.472958	0.604951	0.524645
541	0.0141442	0.00792883	0.0108067	0.00616817	0.00403656	0.0108734	0.000513131	0.0126621	441	0.521266	0.493225	0.503952	0.451479	0.586463	0.530313
540	0.014379	0.00822623	0.0111936	0.00632751	0.00414343	0.011131	0.000630518	0.0129035	440	0.510676	0.479403	0.491421	0.453675	0.582318	0.524952
539	0.0146496	0.00847563	0.0113362	0.00664086	0.00419061	0.011371	0.000622541	0.0130248	439	0.503038	0.465923	0.48747	0.456624	0.593023	0.523236
538	0.0149296	0.00857203	0.0115304	0.0068849	0.00435617	0.011645	0.000579771	0.0133448	438	0.487567	0.469708	0.47906	0.451159	0.597299	0.508111
537	0.0154162	0.00907823	0.0118889	0.00737312	0.00445031	0.0118515	0.000657145	0.0136151	437	0.47632	0.460024	0.480072	0.426848	0.599487	0.490726
536	0.015385	0.00944933	0.0122883	0.00768912	0.00436467	0.0120186	0.000534513	0.0136414	436	0.48412	0.448027	0.471576	0.400843	0.572187	0.500121
535	0.0154024	0.00960643	0.0123891	0.00780619	0.00443016	0.0123066	0.000514775	0.0139005	435	0.486254	0.442269	0.467058	0.386855	0.569631	0.500642
534	0.0158772	0.00993813	0.0124328	0.00780097	0.00448992	0.0124144	0.000451399	0.0140822	434	0.485864	0.444442	0.469949	0.391364	0.580552	0.480189
533	0.0162604	0.0103737	0.012465	0.00786177	0.00461704	0.0126068	0.000539006	0.01438	433	0.480872	0.439515	0.467365	0.389207	0.584936	0.482711
532	0.0167193	0.0106238	0.0127912	0.00809124	0.00482243	0.0129547	0.000630895	0.0146504	432	0.473194	0.423572	0.46955	0.388434	0.588717	0.498243
531	0.0167774	0.010857	0.0128613	0.00825481	0.00482697	0.0131718	0.000692646	0.0148066	431	0.464672	0.407821	0.465684	0.392154	0.58663	0.483122
530	0.0168918	0.0113612	0.0128477	0.0085667	0.00483797	0.0133443	0.000699615	0.0148794	430	0.440175	0.407176	0.450304	0.395441	0.618699	0.490909
529	0.0171482	0.0116051	0.0130623	0.00895984	0.00498452	0.0135264	0.000631862	0.0150794	429	0.42958	0.3985	0.436908	0.38971	0.613723	0.498333
528	0.0173148	0.011999	0.0134082	0.00939059	0.00509062	0.0136856	0.000629328	0.0153528	428	0.422551	0.397196	0.441482	0.392413	0.593714	0.510798
527	0.0176337	0.0123718	0.0136033	0.00935849	0.00510203	0.0137454	0.000639862	0.0156017	427	0.420304	0.403568	0.437662	0.37237	0.578475	0.502271
526	0.017998	0.0127891	0.0137945	0.00962499	0.00516798	0.0139008	0.000613191	0.0157587	426	0.416437	0.394752	0.440142	0.385997	0.58679	0.496757
525	0.0181862	0.0135661	0.0138037	0.00985869	0.00519831	0.0140354	0.00067336	0.0159645	425	0.428785	0.384346	0.430451	0.391448	0.613723	0.495338
524	0.0179775	0.013665	0.0140335	0.0100857	0.00518102	0.0142712	0.00067744	0.016021	424	0.427085	0.392762	0.44414	0.368969	0.622717	0.49954
523	0.0182286	0.014055	0.0141642	0.0104197	0.00533084	0.0145258	0.000669304	0.0161906	423	0.415514	0.397407	0.444298	0.34508	0.61518	0.520291
522	0.0186173	0.0145556	0.0143861	0.0107177	0.00540792	0.0145677	0.000645998	0.0162342	422	0.405729	0.395106	0.432981	0.371947	0.624786	0.508443
521	0.0188221	0.0148433	0.0143863	0.010896	0.00556488	0.0148028	0.000780115	0.0165556	421	0.398168	0.378379	0.436095	0.378426	0.605743	0.50473
520	0.0187032	0.0151439	0.0143683	0.0110337	0.00565156	0.0149004	0.000783442	0.0167073	420	0.402079	0.383162	0.443796	0.394084	0.645971	0.507715
519	0.0191635	0.0156425	0.0146355	0.011331	0.0056555	0.0148559	0.000622043	0.0167266	419	0.385617	0.388176	0.439076	0.390159	0.647543	0.500093
518	0.0192677	0.0160467	0.0145823	0.011598	0.00573943	0.0150307	0.000618363	0.0167989	418	0.376725	0.391993	0.432288	0.379391	0.644365	0.455303
517	0.019414	0.0162182	0.0144789	0.0115581	0.00574843	0.0152112	0.000676153	0.016789	417	0.384081	0.393103	0.435199	0.362731	0.635661	0.470322
516	0.0195972	0.0166391	0.0148291	0.0119648	0.00578391	0.0153845	0.000795498	0.0170366	416	0.391666	0.392747	0.436211	0.34432	0.650484	0.49527
515	0.0197944	0.0169653	0.0148716	0.0120276	0.00584331	0.0155109	0.000775643	0.0171882	415	0.382518	0.376667	0.432594	0.356498	0.667701	0.513477
514	0.0198904	0.0174401	0.0149015	0.0124789	0.00584004	0.0155504	0.000665699	0.0171585	414	0.376603	0.368844	0.417741	0.376683	0.687542	0.509451
513	0.01977	0.0178337	0.0148201	0.0126319	0.00599584	0.0156504	0.000693991	0.0171957	413	0.370375	0.367306	0.408357	0.395823	0.691635	0.492287
512	0.0197916	0.0183285	0.0151989	0.0128081	0.0060333	0.0157695	0.000831373	0.0172198	412	0.379777	0.366388	0.423826	0.392604	0.699974	0.451385
511	0.0197567	0.0186648	0.0151977	0.0129421	0.00597836	0.0157756	0.000800606	0.0173468	411	0.386573	0.353571	0.428897	0.359659	0.668859	0.486879
510	0.0201915	0.0192716	0.0150229	0.0130189	0.00604625	0.015684	0.000832263	0.0173206	410	0.38412	0.356756	0.425912	0.37097	0.702391	0.514995
509	0.0201234	0.0197208	0.0149307	0.0133114	0.00628405	0.0160195	0.000911418	0.0175376	409	0.376225	0.374077	0.432331	0.372957	0.698922	0.492069
508	0.0201058	0.0200288	0.0152427	0.0136741	0.00624443	0.0161127	0.000963945	0.0176358	408	0.374314	0.364833	0.42671	0.392778	0.700657	0.485215
507	0.0203928	0.020471	0.0150656	0.0137858	0.00607689	0.0160542	0.000871351	0.0174803	407	0.376647	0.352608	0.428335	0.364363	0.691653	0.49949
506	0.0205124	0.0208584	0.0150021	0.0138547	0.00601138	0.0161168	0.000719433	0.0173518	406	0.360828	0.363768	0.414421	0.378355	0.68321	0.480843
505	0.020525	0.021325	0.0152823	0.014301	0.00610568	0.0161864	0.000733313	0.0175291	405	0.357107	0.36531	0.405672	0.375451	0.685977	0.482535
504	0.0204651	0.0214999	0.0152609	0.0143176	0.00620759	0.0160932	0.000821135	0.0176388	404	0.369431	0.351174	0.415166	0.361428	0.701339	0.484861
503	0.0204589	0.0218807	0.0151684	0.0143065	0.00620826	0.0160941	0.000863626	0.0174658	403	0.37125	0.355061	0.404107	0.35411	0.731895	0.472163
502	0.0204368	0.0222965	0.0153903	0.0144635	0.00617324	0.0161241	0.000938859	0.0175793	402	0.355476	0.345698	0.41837	0.367987	0.728045	0.468178
501	0.020533	0.0225719	0.0154063	0.0146751	0.00622059	0.0161161	0.000900748	0.0177004	401	0.350957	0.355298	0.418036	0.38702	0.711643	0.453541
500	0.0204993	0.0230865	0.0154955	0.0150678	0.00621784	0.0161916	0.000898731	0.0175953	400	0.347191	0.372639	0.42251	0.384606	0.750605	0.444618
499	0.0204179	0.0232854	0.0151932	0.0149584	0.00614162	0.0161633	0.0010163	0.0174674
498	0.0202411	0.0234729	0.0150468	0.0149684	0.00622146	0.0161694	0.00099101	0.0174156
497	0.0203031	0.0236507	0.0151582	0.0153665	0.00609936	0.0161084	0.000954977	0.0173413
496	0.0203782	0.0240395	0.0151337	0.0153871	0.00606375	0.0159612	0.000909204	0.0171775
495	0.0203646	0.0246775	0.0150173	0.0153668	0.00607776	0.0158175	0.00085553	0.0170767
494	0.0205104	0.0249231	0.0150446	0.0154917	0.00628959	0.0160769	0.0010239	0.0170949
493	0.0203279	0.0250205	0.0150099	0.0157098	0.00629626	0.0159797	0.00103427	0.0170757
492	0.0201014	0.0251927	0.0148877	0.015664	0.0062334	0.0158663	0.000935317	0.0169272
491	0.0199708	0.0253259	0.0147076	0.015513	0.00624378	0.0157845	0.000981272	0.0169414
490	0.0198548	0.0252253	0.0148276	0.0157371	0.00621105	0.015631	0.000962441	0.0168308
489	0.0197572	0.0255981	0.0148611	0.0160286	0.00612766	0.0155368	0.00092231	0.0166818
488	0.0198196	0.0259027	0.0148285	0.0161168	0.0064054	0.015836	0.00117411	0.0167736
487	0.0198125	0.0264582	0.0147494	0.0162036	0.00632367	0.0155748	0.00110567	0.0165643
486	0.0194839	0.0265148	0.0147824	0.0163167	0.00610707	0.0153409	0.00100628	0.0163052
485	0.0192436	0.0264073	0.014619	0.0163183	0.00604122	0.0150963	0.000864005	0.0161832
484	0.0191365	0.0264104	0.0146255	0.016464	0.00609598	0.0151367	0.000943214	0.0161532
483	0.0193769	0.0268039	0.0142593	0.0162058	0.0060523	0.0151362	0.00109283	0.0159279
482	0.0195437	0.0272166	0.0141313	0.0159414	0.00598602	0.0148762	0.000952387	0.0157319
481	0.0191096	0.0271077	0.0141772	0.0161426	0.00610079	0.0147615	0.00101453	0.0155776
480	0.018907	0.0273677	0.0140288	0.0163869	0.00597172	0.0147384	0.0010082	0.0153585
479	0.0186497	0.0274922	0.0138428	0.0163131	0.00599073	0.0146722	0.0010214	0.0153462
478	0.018708	0.0276002	0.0135857	0.0164085	0.00610345	0.01451	0.00104154	0.0152194
477	0.0186275	0.0275173	0.0134181	0.0162372	0.00622978	0.0145165	0.00113253	0.0150649
476	0.018326	0.0275115	0.0137442	0.0163136	0.00613322	0.0143501	0.00115728	0.0148956
475	0.0181421	0.0274204	0.0136856	0.0162419	0.00618264	0.0143315	0.00132767	0.0149453
474	0.0178769	0.0273541	0.0134418	0.016062	0.0060157	0.0141994	0.00114217	0.014559
473	0.017868	0.0272915	0.0132865	0.015803	0.00591084	0.0139723	0.00107854	0.0142711
472	0.0177446	0.0273707	0.0131711	0.0157095	0.0058779	0.0138091	0.00122766	0.0143978
471	0.0174796	0.0272998	0.0129656	0.01579	0.00596054	0.0137939	0.00134345	0.0143506
470	0.0174464	0.0272743	0.0127438	0.0158483	0.00586471	0.0136595	0.00136513	0.0139738
469	0.017316	0.0273218	0.0125342	0.0160106	0.00586549	0.0134503	0.00130197	0.0138333
468	0.0169846	0.0272168	0.0124937	0.0158663	0.00585531	0.0133175	0.00136822	0.0137715
467	0.0168702	0.0270828	0.0123825	0.0156197	0.00587269	0.0131992	0.00137653	0.0136799
466	0.0167035	0.027183	0.012399	0.0157222	0.00585483	0.0130695	0.00135293	0.0134682
465	0.0166112	0.0273418	0.0124453	0.0159449	0.00591065	0.0130133	0.00149077	0.0133841
464	0.0164681	0.0272318	0.0122964	0.0157637	0.00574606	0.0127894	0.00147465	0.0130292
463	0.0163064	0.0269157	0.0119659	0.0154281	0.00574695	0.0126699	0.00144171	0.012844
462	0.0160598	0.0267324	0.0118123	0.0155216	0.00573974	0.012622	0.00154128	0.012856
461	0.015933	0.0266623	0.0119691	0.0157161	0.00566671	0.0125006	0.00162477	0.0126804
460	0.0159745	0.0267168	0.0117078	0.0155218	0.00575994	0.0123711	0.00161198	0.0125313
459	0.0157776	0.026619	0.0116087	0.0152252	0.00587709	0.0122184	0.00169808	0.0124434
458	0.015636	0.0265441	0.0114124	0.0149453	0.00583236	0.0120282	0.00159602	0.0121677
457	0.0156547	0.026553	0.0112603	0.0150111	0.00598068	0.0118824	0.00162866	0.0119221
456	0.0152357	0.0260522	0.0113572	0.0150704	0.00586457	0.0118753	0.00175324	0.0118897
455	0.0150175	0.0260186	0.0113631	0.0150129	0.00565683	0.0116276	0.00171602	0.0116699
454	0.0149171	0.0260006	0.0113684	0.0148513	0.00585097	0.0116008	0.00181982	0.0116235
453	0.0149297	0.0259642	0.0112603	0.0148865	0.00593047	0.0114276	0.00203452	0.0114481
452	0.0147849	0.0258246	0.0108402	0.0148015	0.00590148	0.0112392	0.00213258	0.0113703
451	0.0145064	0.0256536	0.0107512	0.0147014	0.00581116	0.0112756	0.00216877	0.0112259
450	0.0144083	0.0248071	0.0110806	0.0148276	0.0059252	0.011245	0.00214074	0.0112756
449	0.0143657	0.0246896	0.0108484	0.0147773	0.00585371	0.0111198	0.00217018	0.0112305
448	0.0141855	0.0243895	0.0107379	0.0145848	0.00583472	0.0110487	0.00223602	0.011021
447	0.0141624	0.0242514	0.0104716	0.0142943	0.00602159	0.0108952	0.00234863	0.0107197
446	0.0141774	0.024114	0.0107177	0.0143646	0.00595577	0.0107663	0.00242677	0.0104805
445	0.0138558	0.0236438	0.0104653	0.0141809	0.00605008	0.0107917	0.00265905	0.0104336
444	0.0135742	0.0233944	0.0104031	0.0139331	0.00622097	0.0106732	0.00283051	0.0102634
443	0.0136075	0.0233476	0.010414	0.0140626	0.00613665	0.0105405	0.00290839	0.0101581
442	0.0134257	0.0232003	0.0103945	0.014088	0.0062509	0.0104913	0.00312016	0.0102772
441	0.0132167	0.0229704	0.0101719	0.0136807	0.00617555	0.0102544	0.00323088	0.00995781
440	0.01308	0.0225167	0.0103078	0.0139808	0.00619925	0.0103902	0.00347311	0.00992917
439	0.0130007	0.022437	0.0100629	0.0140001	0.00628472	0.010289	0.00361902	0.00985125
438	0.0128073	0.0224699	0.0103121	0.0140806	0.00651304	0.0103195	0.00390094	0.00979155
437	0.0128562	0.0221708	0.0103018	0.0139992	0.00669248	0.0102509	0.00414577	0.00966708
436	0.0127164	0.0218536	0.0101202	0.0138659	0.00673338	0.0100292	0.00433386	0.00955326
435	0.0124869	0.0213414	0.0101855	0.0138782	0.00685427	0.00997369	0.00460459	0.0094909
434	0.0123472	0.0212474	0.0100828	0.013748	0.00690507	0.00971441	0.00488558	0.00926569
433	0.012447	0.0210223	0.0100733	0.0137593	0.00699973	0.00955102	0.00524779	0.00931601
432	0.0122409	0.0204381	0.0103013	0.0138545	0.00725105	0.00968701	0.00566792	0.00951448
431	0.0123327	0.0202186	0.0104222	0.0138008	0.00758031	0.00979477	0.00592191	0.00952191
430	0.0122853	0.0202151	0.0102564	0.0137441	0.00764426	0.00951458	0.00613037	0.00935534
429	0.0121564	0.0200112	0.0101726	0.0136328	0.00753075	0.00935752	0.0062907	0.00906469
428	0.0119385	0.0195575	0.0102202	0.0137937	0.00781493	0.00944	0.00667567	0.00907369
427	0.011792	0.0193315	0.0102017	0.0138982	0.00799732	0.00956098	0.00705822	0.00921475
426	0.0120145	0.0195149	0.010219	0.0141308	0.0082146	0.00943368	0.00743715	0.00919033
425	0.0121498	0.0195438	0.0102003	0.0143615	0.00838358	0.00945613	0.00784436	0.00904816
424	0.0122486	0.0195077	0.0106584	0.0145982	0.00877494	0.00972036	0.00844772	0.00913364
423	0.0120351	0.0194166	0.0105919	0.0145065	0.00916469	0.00960841	0.00888217	0.00921418
422	0.0120265	0.019424	0.0107955	0.0145782	0.00937066	0.00954038	0.00939601	0.00929722
421	0.0121251	0.0195894	0.0110026	0.0147512	0.00951424	0.00940994	0.00969192	0.00918156
420	0.0119902	0.0191757	0.0108085	0.0148513	0.009593	0.0093622	0.00993952	0.00907322
419	0.0115779	0.0186415	0.0108682	0.0150644	0.00991999	0.0095223	0.0103992	0.0090797
418	0.011576	0.0184299	0.0109835	0.0150487	0.0103446	0.00953726	0.0108536	0.00913873
417	0.0117368	0.0181142	0.0109391	0.0149453	0.0105536	0.00950016	0.0112457	0.00923589
416	0.0118347	0.0179248	0.0108329	0.0149263	0.0108827	0.00946514	0.0117971	0.0093719
415	0.0116661	0.0178611	0.0109905	0.0151298	0.0111112	0.00933056	0.0120772	0.00929058
414	0.0115843	0.017788	0.011193	0.0154149	0.0112904	0.00948724	0.0124766	0.00921197
413	0.0115604	0.0173648	0.0113087	0.0154994	0.0115684	0.00961755	0.0129512	0.00944876
412	0.0118743	0.0174064	0.0112837	0.0154753	0.0119167	0.00962996	0.0134269	0.00948736
411	0.0118479	0.0174936	0.0112538	0.0155725	0.0120877	0.00967703	0.0139886	0.00945595
410	0.0117235	0.0166287	0.0112807	0.0155354	0.0121944	0.00942304	0.0140434	0.00940759
409	0.0113096	0.0164572	0.011329	0.0157529	0.0124078	0.009404	0.0144102	0.00935088
408	0.0113153	0.0165054	0.0114214	0.0159137	0.0127501	0.0095972	0.0149935	0.00937723
407	0.0114547	0.0163424	0.0114983	0.0160105	0.0130551	0.00962454	0.0153992	0.00952331
406	0.011509	0.0160454	0.0116703	0.0160608	0.0132976	0.00962687	0.0158643	0.00952379
405	0.0112767	0.0160096	0.0116124	0.0159114	0.0134488	0.00950785	0.0161167	0.00943251
404	0.0111005	0.0156846	0.0116058	0.0159002	0.0137618	0.00960799	0.0165239	0.00955164
403	0.0114762	0.0156749	0.0114931	0.0160828	0.014013	0.00966643	0.0170557	0.00964497
402	0.0116979	0.0157361	0.0116596	0.0162958	0.0142177	0.00978158	0.0174559	0.00971042
401	0.0114682	0.0156448	0.0119989	0.016749	0.0145855	0.00977083	0.0177907	0.00984656
400	0.0113642	0.0154206	0.011884	0.0166002	0.0149985	0.00991974	0.0182228	0.0100901
399	0.0115357	0.0153839	0.0121283	0.0167042	0.0152339	0.00997633	0.0186326	0.0101637
398	0.0116392	0.0154753	0.0123018	0.0169041	0.0154286	0.0100547	0.0189445	0.0102158
397	0.0115948	0.0151982	0.0122049	0.0170579	0.0155312	0.0100655	0.0191791	0.0102562
396	0.0115046	0.0149886	0.0122462	0.016997	0.0156272	0.0099723	0.0194408	0.0100759
395	0.0118313	0.0152474	0.0123818	0.0168996	0.0160098	0.010031	0.0197548	0.0101643
394	0.0118712	0.0153562	0.0127085	0.0171185	0.016335	0.0102147	0.0201148	0.0103185
393	0.0116	0.0150587	0.0127207	0.0174061	0.0163467	0.0101282	0.020311	0.0103975
392	0.0116175	0.0147527	0.0126409	0.017439	0.0164652	0.0102315	0.0204837	0.0104635
391	0.0117675	0.0148827	0.0124958	0.0171234	0.0166774	0.0103153	0.020799	0.0105787
390	0.0117192	0.0147742	0.0125492	0.0173697	0.0168385	0.0103722	0.021007	0.0105476
389	0.011798	0.0147289	0.0128375	0.0178978	0.0169017	0.0103087	0.0211775	0.0106736
388	0.0118627	0.01474	0.0128529	0.0177603	0.0170852	0.0104114	0.0214196	0.0109666
387	0.0120519	0.0147088	0.0129758	0.0178475	0.0172697	0.0106106	0.0215715	0.0109667
386	0.0121253	0.0147619	0.0132127	0.0180237	0.0174315	0.0105655	0.0217996	0.0109729
385	0.0121617	0.0146419	0.0132558	0.0180599	0.0174884	0.0105237	0.0218952	0.0110537
384	0.012283	0.0144715	0.013112	0.0182028	0.0174931	0.0106222	0.0221214	0.0110819
383	0.0122821	0.0145829	0.0130593	0.0182006	0.0176199	0.0106803	0.0220738	0.0110424
382	0.0125451	0.0147077	0.0135153	0.0184041	0.0177038	0.0106607	0.0220847	0.0111337
381	0.0126987	0.0147643	0.0136262	0.0185107	0.0178768	0.0108591	0.0222003	0.0113996
380	0.0127305	0.0147922	0.0134661	0.0183961	0.0178457	0.0110556	0.0222674	0.0114371
379	0.0129336	0.0147794	0.0136209	0.0186208	0.0180929	0.0111758	0.0223747	0.011442
378	0.0127115	0.0147316	0.0137396	0.0189766	0.0182334	0.0111339	0.0224023	0.0114663
377	0.0128456	0.0148996	0.0138596	0.0187538	0.0181203	0.0112708	0.022377	0.0115159
376	0.0134235	0.0150751	0.0137187	0.0186894	0.01797	0.0111863	0.0222421	0.0116344
375	0.0133682	0.0150023	0.0139514	0.0188308	0.0180173	0.0111381	0.0221986	0.011825
374	0.0134257	0.0150848	0.0140334	0.0190289	0.0180868	0.0112442	0.0221692	0.0119335
373	0.013463	0.0150223	0.0140403	0.0190372	0.0179756	0.0112834	0.0221297	0.0120521
372	0.0135725	0.0150377	0.0140821	0.0192186	0.0179554	0.011296	0.0220095	0.0121097
371	0.0136523	0.0152562	0.0142444	0.0190578	0.0181026	0.0115431	0.0221333	0.012376
370	0.0136561	0.0135935	0.0146082	0.0190497	0.0180489	0.0114479	0.0218466	0.0120518
369	0.0136652	0.0137543	0.0148636	0.0189963	0.0178479	0.011394	0.0216316	0.011972
368	0.0136856	0.0136726	0.0149802	0.0192232	0.0176159	0.0113245	0.0214172	0.0120156
367	0.0135936	0.0136722	0.0148824	0.0191197	0.017588	0.0115382	0.0212478	0.0122101
366	0.0136357	0.0137166	0.0148874	0.0190366	0.0173986	0.0115228	0.0210347	0.0121609
365	0.0139066	0.0141638	0.0150114	0.0191719	0.0174624	0.0118175	0.0211086	0.0123896
364	0.0140386	0.0141899	0.0151373	0.019315	0.017672	0.0118671	0.0208952	0.0125144
363	0.0139938	0.0141215	0.0151359	0.0192251	0.0175201	0.0119924	0.0206688	0.0125265
362	0.0141855	0.0141894	0.015087	0.0191201	0.0173344	0.0119278	0.0204373	0.0125858
361	0.0143961	0.0143271	0.0152964	0.0190265	0.0171933	0.011844	0.0202409	0.0125636
360	0.0145463	0.0144324	0.015331	0.0189478	0.0170497	0.0120649	0.02002	0.0126433
359	0.0146282	0.0144461	0.0155378	0.0191838	0.016845	0.0119616	0.0197833	0.0127674
358	0.0145976	0.0146916	0.0155897	0.0190724	0.0165332	0.0117795	0.0194217	0.0125908
357	0.0148035	0.0147198	0.0155696	0.0189021	0.0164687	0.0118083	0.0192579	0.0126818
356	0.0151165	0.0147342	0.0157951	0.0189068	0.0165897	0.0120707	0.0194244	0.0129534
355	0.0151893	0.0147898	0.0156337	0.0188626	0.0163753	0.0120682	0.0190111	0.0128681
354	0.0153198	0.014922	0.015967	0.0189404	0.0163354	0.0121853	0.0187846	0.0130097
353	0.0151856	0.0149225	0.016261	0.0189848	0.0160897	0.0122277	0.0184666	0.0129914
352	0.0152001	0.0148304	0.015754	0.0184849	0.0158194	0.0122017	0.0181116	0.0129132
351	0.0152772	0.0149111	0.0159539	0.0186364	0.015612	0.0120128	0.0178744	0.0128106
350	0.0154433	0.0151626	0.0162386	0.0185966	0.0157208	0.0122572	0.0177671	0.0131565
349	0.0154673	0.0152243	0.0161873	0.0184436	0.0154944	0.0123069	0.0174332	0.0131561
348	0.0157006	0.0155017	0.0162767	0.0186276	0.0152203	0.0121643	0.0172284	0.0128868
347	0.0157596	0.0155731	0.0163501	0.0188199	0.0150061	0.0121419	0.0169667	0.0129054
346	0.0155831	0.0155383	0.0163735	0.0186513	0.0149149	0.0122576	0.0167096	0.0130887
345	0.015375	0.0155305	0.0163734	0.0184533	0.014709	0.0122796	0.0164919	0.0130783
344	0.0155994	0.0157991	0.016206	0.0184936	0.0144797	0.0122652	0.0161648	0.012892
343	0.0160627	0.0161916	0.0162947	0.0183664	0.0144943	0.0124822	0.01617	0.0131442
342	0.0159552	0.0158928	0.0163422	0.0185029	0.0142472	0.0123254	0.0156609	0.0130583
341	0.0157421	0.0156662	0.0165964	0.0187005	0.0139872	0.0120779	0.0153704	0.0129833
340	0.0161825	0.0148	0.0167797	0.0186943	0.0136813	0.0121543	0.0149278	0.0126206
339	0.0161402	0.0148186	0.016856	0.0188041	0.0135985	0.0121545	0.0146355	0.0125441
338	0.0162092	0.0148364	0.0169152	0.0187625	0.0133431	0.0119711	0.0142861	0.0125562
337	0.0161209	0.0148731	0.0169021	0.0187919	0.01308	0.0118074	0.0139637	0.0124722
336	0.0162724	0.0150788	0.0169238	0.0186538	0.0131255	0.0120087	0.0140073	0.0125478
335	0.0163539	0.0150859	0.0166302	0.0182115	0.0130463	0.0120089	0.0138323	0.0125051
334	0.0161568	0.0150369	0.0164896	0.0181493	0.0130144	0.0120506	0.0137854	0.0125432
333	0.0160422	0.0150022	0.0167142	0.0184032	0.0128498	0.0121435	0.0137528	0.0125729
332	0.0162072	0.0150069	0.0169342	0.0184076	0.0125888	0.0120621	0.0133887	0.0124464
331	0.0160733	0.01503	0.0170998	0.0184933	0.0123987	0.011866	0.0130506	0.0123263
330	0.016313	0.0149862	0.0171414	0.0182238	0.0122855	0.0119781	0.0129726	0.012461
329	0.0163195	0.0152033	0.0170933	0.0182118	0.0123125	0.0122724	0.0128704	0.0125555
328	0.0162917	0.0151824	0.0172432	0.0183925	0.0121419	0.0121464	0.0127228	0.0125789
327	0.0161275	0.0148495	0.016961	0.0179461	0.0119979	0.0119576	0.0127995	0.0125703
326	0.0159761	0.014851	0.0168163	0.017702	0.0118727	0.0119461	0.0125221	0.0124101
325	0.0158977	0.0146119	0.0167846	0.0177373	0.0119102	0.0120321	0.0123955	0.0125309
324	0.0158837	0.0144525	0.0169094	0.0177852	0.0119064	0.0122654	0.0123827	0.0127761
323	0.0157004	0.0145103	0.0169497	0.0178268	0.0118177	0.0122195	0.0123412	0.0126879
322	0.0159038	0.0146836	0.0167572	0.0174311	0.011853	0.0121741	0.0121602	0.0127609
321	0.0158274	0.0146303	0.0167995	0.0172367	0.0118548	0.0121342	0.0120673	0.0126949
320	0.0157669	0.0143366	0.0169821	0.0172386	0.0117247	0.0121003	0.0119842	0.0126568
319	0.0157478	0.0142253	0.0171034	0.0173943	0.0116538	0.0121931	0.0118637	0.0127081
318	0.0153525	0.0141465	0.0171869	0.0174886	0.0114425	0.0122535	0.0118175	0.0128659
317	0.0155631	0.0142577	0.0171334	0.0176002	0.0115681	0.0121958	0.0119132	0.0128415
316	0.0156767	0.014341	0.0172591	0.0175527	0.0116119	0.0122479	0.0118951	0.0128866
315	0.0155717	0.0144204	0.0171336	0.0176348	0.0116054	0.0124444	0.0120145	0.0130532
314	0.0156864	0.0143868	0.0174382	0.0179935	0.0117421	0.0126097	0.0121268	0.0132407
313	0.015754	0.0145478	0.0177049	0.018074	0.0117375	0.0128562	0.0121739	0.0133134
312	0.0158963	0.014793	0.0176195	0.017975	0.0119764	0.0130299	0.0123079	0.0135695
311	0.0162365	0.015037	0.0180665	0.0183455	0.0122778	0.0133332	0.0126692	0.0139393
310	0.0166435	0.0152918	0.018663	0.0190696	0.0125404	0.0138087	0.0129291	0.014346
309	0.0172544	0.0160826	0.0193134	0.019736	0.0130573	0.0142546	0.0134373	0.0148369
308	0.0176897	0.0165679	0.0200381	0.0203137	0.0136745	0.0149013	0.014178	0.0155776
307	0.0186154	0.017669	0.0210865	0.0214787	0.0146908	0.0158459	0.015008	0.0163953
306	0.0199928	0.0186407	0.0226468	0.0229298	0.0159135	0.0169279	0.0161818	0.0178438
305	0.0216059	0.0200921	0.0245479	0.0249594	0.017759	0.0186402	0.0181124	0.0197493
304	0.0233155	0.0221352	0.0272662	0.0274765	0.019662	0.0205419	0.0200972	0.0215483
303	0.0258338	0.0248792	0.03062	0.0309015	0.021906	0.0229296	0.0225243	0.0240223
302	0.0290008	0.0280239	0.0344376	0.0346489	0.0247862	0.0256919	0.0256556	0.0269312
301	0.0322618	0.0311542	0.039131	0.0393052	0.0284972	0.0291482	0.0293157	0.0304505
300	0.036452	0.0353741	0.0448636	0.0448026	0.0327046	0.0333144	0.0336745	0.0349057
299	0.0414741	0.0402998	0.0513157	0.0512188	0.0379861	0.0382521	0.0390708	0.040252
298	0.047395	0.0458763	0.0589356	0.0586613	0.0437668	0.04389	0.0451408	0.0461954
297	0.0542217	0.0525343	0.0679275	0.0675663	0.050739	0.0506214	0.0523749	0.0532203
296	0.0622137	0.0604899	0.0787424	0.0783517	0.0592259	0.0585643	0.0612575	0.0615881
295	0.0720912	0.0705194	0.0915006	0.0911021	0.0693209	0.0680477	0.0717934	0.0716286
294	0.0830591	0.0816948	0.105875	0.105542	0.0814231	0.0793393	0.0843367	0.0833512
293	0.094491	0.0931635	0.120622	0.120659	0.0941491	0.0912567	0.0975388	0.0959844
292	0.105127	0.10388	0.134361	0.134128	0.105786	0.101989	0.109262	0.107104
291	0.113723	0.112265	0.145555	0.144898	0.115032	0.110834	0.118577	0.116154
290	0.121967	0.119754	0.155561	0.154787	0.122511	0.118081	0.126232	0.123714
289	0.130678	0.127941	0.167066	0.165956	0.130572	0.125721	0.134424	0.1319
288	0.140613	0.137608	0.180114	0.178646	0.140069	0.134741	0.144215	0.141461
287	0.150823	0.147663	0.193675	0.192305	0.15034	0.144172	0.154819	0.151404
286	0.160391	0.157392	0.206236	0.204871	0.159784	0.15302	0.164481	0.160577
285	0.168301	0.165445	0.216391	0.215036	0.167156	0.159909	0.172093	0.167738
284	0.174626	0.171647	0.224333	0.223371	0.172291	0.164436	0.177198	0.172488
283	0.179703	0.176651	0.231224	0.230158	0.176045	0.167933	0.18088	0.176005
282	0.184521	0.18115	0.237094	0.23585	0.17867	0.170507	0.183716	0.178811
281	0.188174	0.184776	0.241984	0.240685	0.180327	0.172118	0.185357	0.18045
280	0.191185	0.187715	0.246361	0.245132	0.181071	0.172822	0.185964	0.181134
279	0.193262	0.189913	0.249481	0.24846	0.180504	0.172235	0.18546	0.180631
278	0.194695	0.191539	0.251929	0.25097	0.179203	0.170919	0.184083	0.179228
277	0.196209	0.19304	0.254142	0.252932	0.177639	0.169396	0.182396	0.17771
276	0.196896	0.193911	0.255899	0.254712	0.175523	0.167451	0.18024	0.175586
275	0.197549	0.194419	0.256586	0.255381	0.172803	0.164838	0.177457	0.172796
274	0.197308	0.194097	0.25647	0.25526	0.169211	0.16148	0.173925	0.169284
273	0.196545	0.193461	0.256005	0.254942	0.165018	0.157624	0.169633	0.165177
272	0.195402	0.192452	0.255343	0.254498	0.160702	0.153524	0.165143	0.160963
271	0.194462	0.191651	0.254752	0.253988	0.156298	0.149407	0.160584	0.156601
270	0.19318	0.190465	0.253985	0.253279	0.151894	0.145274	0.156145	0.152243
269	0.191427	0.188923	0.25241	0.251561	0.147171	0.14077	0.151196	0.147652
268	0.189517	0.187245	0.250003	0.249167	0.141837	0.135836	0.145755	0.142581
267	0.187692	0.185344	0.24856	0.247828	0.136698	0.131072	0.14054	0.137441
266	0.186001	0.183651	0.24682	0.246125	0.131975	0.126697	0.135612	0.132873
265	0.183889	0.181583	0.244389	0.243668	0.126844	0.121872	0.13045	0.127884
264	0.181168	0.178831	0.241115	0.240565	0.121546	0.116856	0.124852	0.122608
263	0.178475	0.176277	0.238229	0.237806	0.116618	0.112371	0.119704	0.117776
262	0.175939	0.174123	0.2356	0.235604	0.112106	0.108535	0.115097	0.113744
261	0.173835	0.172173	0.232969	0.233163	0.108171	0.104966	0.111039	0.110124
260	0.171644	0.17001	0.230339	0.230319	0.104486	0.101511	0.10743	0.106664
259	0.168445	0.16662	0.226497	0.226415	0.100447	0.097639	0.103217	0.102662
258	0.164933	0.162901	0.221617	0.221762	0.0961339	0.0938127	0.0986113	0.0983038
257	0.161173	0.159688	0.217048	0.21732	0.0918386	0.0899648	0.0941321	0.0942965
256	0.158098	0.15701	0.213534	0.21376	0.0883687	0.0867869	0.0906753	0.0912582
255	0.155987	0.154875	0.210596	0.210678	0.0859091	0.0846839	0.0881722	0.0888582
254	0.153776	0.152446	0.20769	0.207888	0.0838263	0.0828	0.0862387	0.0869745
253	0.151119	0.149961	0.20454	0.20481	0.0821584	0.0811983	0.0846867	0.0854845
252	0.148072	0.147262	0.20077	0.201341	0.0806622	0.0797131	0.0831595	0.0840503
251	0.145191	0.144408	0.197382	0.197923	0.0797018	0.0787964	0.0821852	0.0831355
250	0.143033	0.142237	0.194996	0.195371	0.0795766	0.0783187	0.0819979	0.0826679
