# Supplementary material for: Coral anthozoan-specific opsins employ a novel chloride counterion for spectral tuning
Source: eLife. 2025 Sep 1;14:RP105451. doi: 10.7554/eLife.105451 (PMC12401545; doi:10.7554/eLife.105451)
Supplement: Figure 3—figure supplement 1—source data 1. [file elife-105451-fig3-figsupp1-data1.xlsx]

## Sheet: Sheet1
wavelength [nm]	A_abs_Antho2a_WT_dark_0_28Cl_pH4_9	A_abs_Antho2a_WT_dark_0_28Cl_pH6_5	A_abs_Antho2a_WT_dark_0_28Cl_pH7_4	A_abs_Antho2a_WT_dark_0_28Cl_pH8_3	B_abs_Antho2a_WT_dark_2_8Cl_pH5	B_abs_Antho2a_WT_dark_2_8Cl_pH6_5	B_abs_Antho2a_WT_dark_2_8Cl_pH7_4	B_abs_Antho2a_WT_dark_2_8Cl_pH8_3	B_abs_Antho2a_WT_dark_2_8Cl_pH8_7	C_abs_Antho2a_WT_dark_28Cl_pH6_5	C_abs_Antho2a_WT_dark_28Cl_pH7_4	C_abs_Antho2a_WT_dark_28Cl_pH8_3	C_abs_Antho2a_WT_dark_28Cl_pH9_0	D_abs_Antho2a_WT_dark_140Cl_pH6_5	D_abs_Antho2a_WT_dark_140Cl_pH7_6	D_abs_Antho2a_WT_dark_140Cl_pH8_7	D_abs_Antho2a_WT_dark_140Cl_pH9_2	D_abs_Antho2a_WT_dark_140Cl_pH10_3	E_abs_Antho2a_WT_dark_500Cl_pH6_5	E_abs_Antho2a_WT_dark_500Cl_pH8_4	E_abs_Antho2a_WT_dark_500Cl_pH9_1	E_abs_Antho2a_WT_dark_500Cl_pH10_0
750	0.000116199	0.000415119	0.00153749	0.000609066	7.00279e-05	7.23642e-05	0.00126618	0.000665572	0.0013271	0.00042779	0.000448103	0.000560104	0.00116119	0.000757698	-0.00014141	-0.00172172	0.000608611	0.00272345	-0.000850075	-0.000369283	-0.000360867	-0.000527732
749	0.000123267	0.000427909	0.00147088	0.000535496	4.2468e-05	0.000110714	0.00120946	0.000767357	0.00138064	0.000335825	0.00054678	0.000585704	0.00111488	0.000851269	-0.000185439	-0.00172536	0.00053128	0.00261257	-0.000783808	-0.000254113	-0.00026039	-0.000530147
748	4.00723e-05	0.000407793	0.00138169	0.00056151	-4.66855e-05	-1.79577e-05	0.00114828	0.000690321	0.00125892	0.000229764	0.000604988	0.000491482	0.0011052	0.000890028	-0.00019342	-0.00175146	0.000647516	0.00262567	-0.000696022	-0.00012196	-0.0001101	-0.00037065
747	6.54938e-05	0.000379382	0.00136302	0.000601325	-6.44644e-05	3.40733e-05	0.00113346	0.000625182	0.00122916	0.000249265	0.000473287	0.000543632	0.00117109	0.000876153	-0.000257981	-0.00185234	0.000585189	0.00264422	-0.000741143	-0.00033917	-0.000308953	-0.000472657
746	0.000240118	0.000462002	0.0015265	0.000781434	8.44016e-05	0.000285041	0.00129095	0.000777058	0.00145279	0.000388648	0.000519161	0.000676323	0.00133017	0.000774675	-0.000300193	-0.00189533	0.000587168	0.00274126	-0.00062364	-0.000448443	-0.00027867	-0.000585032
745	0.000220241	0.000434937	0.00141725	0.00075724	7.67396e-05	0.000108497	0.00118956	0.000631419	0.00140808	0.000312621	0.000529159	0.000589664	0.00129814	0.000682676	-0.000255659	-0.00186785	0.000570161	0.00290798	-0.000626074	-0.000313213	-0.000240297	-0.000571647
744	0.000109031	0.000529971	0.00123546	0.000616452	-6.09405e-05	-7.30375e-05	0.00112045	0.000561926	0.00122122	0.000227288	0.000452419	0.000555016	0.00116202	0.000792764	-0.000209449	-0.00186207	0.000574853	0.0028987	-0.000724435	-0.000188404	-0.000183375	-0.000399201
743	0.000166685	0.000544285	0.00131418	0.000761556	-2.17586e-05	3.13018e-05	0.00119794	0.000592099	0.00138707	0.000395993	0.000453489	0.000641477	0.00117519	0.00082267	-0.00023519	-0.00173727	0.0005681	0.00274221	-0.000636231	-0.000141663	-8.62626e-05	-0.000303811
742	0.000199986	0.000559372	0.0014717	0.000726869	8.23427e-05	7.63237e-05	0.00136607	0.000674937	0.00157184	0.00060182	0.000494413	0.000754983	0.00125696	0.000955134	-0.000154679	-0.0016993	0.000607562	0.00262698	-0.000522647	-7.13743e-05	3.9341e-05	-0.000240398
741	9.87753e-05	0.000393875	0.00147423	0.000663533	-3.98746e-05	2.73419e-05	0.0013181	0.000650406	0.00143734	0.00031072	0.000343566	0.000705922	0.00117907	0.000843827	-4.8007e-05	-0.00168809	0.000715722	0.00253205	-0.000735086	-0.000390849	-0.000131067	-0.000376888
740	5.65257e-05	0.000338082	0.00142897	0.000616947	-0.000170565	-7.24233e-05	0.00116816	0.00064906	0.00135089	0.000288308	0.000418881	0.000516568	0.00113282	0.000730863	-4.2795e-05	-0.00181298	0.000561511	0.00271885	-0.000988528	-0.000452223	-0.000485443	-0.000736829
739	0.000112555	0.000361702	0.00144536	0.000630271	-0.000110358	-9.60264e-06	0.00115753	0.000564421	0.00148623	0.000362454	0.00047404	0.000514033	0.00113807	0.000735385	-3.54334e-05	-0.00173853	0.000692656	0.00263035	-0.000900664	-0.0003602	-0.000332283	-0.000590873
738	9.93895e-05	0.000461745	0.00146276	0.000696894	8.88565e-05	8.77083e-05	0.00121477	0.000540028	0.00143806	0.000404943	0.000529595	0.000555531	0.00123318	0.000788198	-3.40051e-05	-0.00163773	0.000742172	0.00266496	-0.000905054	-0.000297316	-0.000304837	-0.000641395
737	0.000206896	0.000495125	0.00157237	0.000620134	0.000102735	7.24827e-05	0.00125666	0.000659949	0.00135912	0.000380649	0.000626786	0.000645338	0.00125611	0.000786858	-7.34229e-05	-0.00164952	0.000645439	0.002696	-0.000813688	-0.000368992	-0.000212918	-0.000703468
736	2.61144e-05	0.000477287	0.00140181	0.000584061	-1.41363e-05	-3.32423e-05	0.00119404	0.000561867	0.00132111	0.000239762	0.000377501	0.000538366	0.00111243	0.000799338	6.72057e-05	-0.00170088	0.000633145	0.00269202	-0.000867438	-0.000423887	-9.32667e-05	-0.000558222
735	-8.25208e-05	0.000389657	0.00123055	0.000573528	2.61738e-05	-6.37913e-05	0.00107172	0.000489542	0.00128927	0.000199333	0.000425256	0.000542761	0.00105026	0.000743419	-4.29954e-05	-0.00170477	0.000601697	0.00267026	-0.000750251	-0.000240393	-7.90933e-05	-0.000531694
734	-6.51576e-05	0.000350971	0.00117952	0.000525259	-7.66203e-06	-4.13793e-06	0.00108481	0.000512806	0.00129374	0.000187771	0.000477682	0.000555749	0.00105911	0.000691828	-4.80565e-05	-0.00171655	0.000530426	0.00260934	-0.000767416	-0.000415577	-0.00049744	-0.000763713
733	-2.4944e-06	0.000461606	0.00126636	0.000587664	-1.40569e-05	2.91044e-05	0.00113533	0.000644684	0.00131526	0.000304821	0.000473763	0.000656524	0.00109233	0.000726345	2.16744e-05	-0.00160868	0.00050665	0.00262607	-0.000774864	-0.000445947	-0.000550383	-0.000780701
732	5.3397e-05	0.00058418	0.00142045	0.000597821	2.23528e-05	0.000142966	0.00121475	0.000765892	0.00142669	0.000495799	0.000475208	0.000571726	0.00112896	0.000709462	-1.13478e-05	-0.00174067	0.000459091	0.00266323	-0.000762131	-0.00042886	-0.000376177	-0.000635853
731	7.51361e-05	0.000434799	0.00142661	0.000560501	0.000108378	0.000141561	0.00129267	0.000632627	0.00133994	0.000417871	0.000481979	0.000501362	0.00117988	0.000837252	-2.99371e-05	-0.00168485	0.000486537	0.00261172	-0.000919905	-0.000454103	-0.00032529	-0.000631478
730	9.98251e-05	0.000407081	0.00138652	0.00063435	0.000130671	5.17338e-05	0.00126929	0.000607898	0.00129709	0.000449311	0.000452459	0.00061956	0.00124056	0.00087371	-0.000117961	-0.00164531	0.000500927	0.00274812	-0.000828534	-0.000574456	-0.00037344	-0.000583309
729	6.15542e-05	0.000378214	0.00141687	0.000653396	0.000121108	-2.55408e-06	0.00129153	0.000548958	0.00145414	0.000330915	0.000447608	0.000635102	0.00126773	0.000714968	-9.0677e-05	-0.00167903	0.000571331	0.00265839	-0.000787549	-0.000520425	-0.000421155	-0.000619597
728	2.36593e-05	0.000407793	0.00135637	0.000630251	0.000146431	4.73583e-05	0.00129224	0.000491244	0.00146936	0.000242118	0.000570261	0.000638309	0.00130632	0.00065261	-0.000177849	-0.0016505	0.000582634	0.0025552	-0.000747535	-0.000289217	-0.0004404	-0.000534619
727	7.53533e-05	0.000573924	0.00136607	0.0007612	0.000268232	0.000184702	0.00126212	0.000664978	0.00147852	0.000430443	0.00061659	0.000675293	0.00143503	0.000664161	-0.000158662	-0.0016937	0.00062267	0.00246729	-0.000649911	-0.000248513	-0.000179893	-0.000482929
726	0.000136017	0.000570479	0.00146704	0.000716536	0.00019474	0.000140313	0.00128214	0.000791472	0.0015279	0.00054973	0.000607404	0.000618115	0.00133497	0.000699411	-9.09903e-05	-0.00161594	0.00066282	0.00253877	-0.000700655	-0.000332537	-0.000120493	-0.000537831
725	0.000244474	0.000462458	0.00154564	0.000663434	3.60732e-05	0.000137264	0.001243	0.000777593	0.00144352	0.000546523	0.000653594	0.000569172	0.00120435	0.000685007	-0.000162977	-0.00162503	0.000581509	0.00254316	-0.000885316	-0.000472197	-0.000311293	-0.000630608
724	0.000248493	0.000438006	0.00154338	0.000676996	-5.12804e-06	0.000101171	0.00127961	0.000822318	0.00141862	0.000409456	0.000671967	0.000631815	0.00128079	0.000806399	-0.00017442	-0.00168155	0.000617184	0.00253128	-0.000830103	-0.000428031	-0.000358795	-0.000533835
723	6.15773e-06	0.000285141	0.00133154	0.000515558	-0.000148213	-4.46853e-05	0.0011354	0.00059398	0.00127575	0.000146867	0.000474	0.000451707	0.00116458	0.000751898	-6.43776e-05	-0.00176148	0.000640721	0.00252565	-0.000680244	-0.000379304	-0.000389835	-0.00049184
722	4.67249e-05	0.000227289	0.00129499	0.000507796	-0.000178366	-1.04538e-05	0.00108254	0.000493324	0.00119748	0.000158726	0.000406229	0.000409793	0.000938496	0.000802474	-1.83026e-05	-0.00181907	0.000545554	0.00255685	-0.000658307	-0.000398823	-0.00022592	-0.000560443
721	6.33755e-05	0.000372928	0.00128689	0.000619916	-9.3905e-05	4.1221e-05	0.00124987	0.00065498	0.00125106	0.000208876	0.000484018	0.000488037	0.00110389	0.000714913	-1.16514e-05	-0.00167785	0.000634765	0.00254631	-0.000806303	-0.000500079	-0.0002659	-0.000661655
720	0.000338894	0.000487226	0.00140721	0.000750251	2.16203e-05	0.000141561	0.00133245	0.000784622	0.00143376	0.000350259	0.000538346	0.000636211	0.00123556	0.000769146	-0.000194907	-0.00159843	0.000615379	0.00261521	-0.000709642	-0.000325608	-0.00016306	-0.000668461
719	0.000307711	0.000452538	0.00136181	0.000646189	-7.27797e-05	3.66473e-05	0.00121449	0.000700655	0.00144948	0.000414901	0.000440204	0.000647575	0.0012131	0.000934097	-0.000247908	-0.00161767	0.000568695	0.00264198	-0.000782068	-0.000376573	-0.000308403	-0.00069929
718	0.000257739	0.00047994	0.00144966	0.000662206	2.06103e-05	8.51541e-05	0.00133754	0.000764605	0.00153691	0.000460101	0.000571509	0.000737797	0.00127313	0.0010095	-0.000129664	-0.00167036	0.000497043	0.00253564	-0.00103014	-0.000654562	-0.000609758	-0.000889039
717	3.52615e-05	0.000395221	0.00133374	0.000592	5.97325e-05	-5.6821e-06	0.00125625	0.000716613	0.00138316	0.000248513	0.000539534	0.000653158	0.00125933	0.00100066	-0.00011442	-0.00175216	0.000558322	0.00257879	-0.00105909	-0.00056561	-0.000589981	-0.000798799
716	4.18151e-05	0.000392905	0.00137908	0.000555353	-3.48447e-06	2.32837e-05	0.00123283	0.000686321	0.00138765	0.000278746	0.000512152	0.00060776	0.00124429	0.000914996	-0.000107725	-0.00163987	0.000613402	0.00268118	-0.000870034	-0.000337173	-0.000386193	-0.000549335
715	8.25803e-05	0.000314482	0.00137704	0.000577092	4.09239e-05	-3.97944e-06	0.00129551	0.000634726	0.00134144	0.000310483	0.000465883	0.000548186	0.00123144	0.000861746	2.87901e-05	-0.00174298	0.000607305	0.00260888	-0.000820694	-0.000342419	-0.000276847	-0.000450102
714	0.000145045	0.000398072	0.00136888	0.000487839	6.69592e-05	2.83517e-05	0.00127414	0.000641022	0.00133772	0.00036677	0.000544978	0.000654168	0.00117491	0.000831973	0.000118282	-0.00163998	0.000624232	0.00252941	-0.00081309	-0.000455445	-0.000397831	-0.000625576
713	0.000152113	0.000500788	0.00133742	0.000560065	-6.07623e-05	6.49e-05	0.00126393	0.000730155	0.00130071	0.000355465	0.000686697	0.000596415	0.00117851	0.000841205	-0.000103624	-0.00152428	0.000611104	0.0025031	-0.000832256	-0.000436697	-0.000336064	-0.000536758
712	0.000112179	0.0005468	0.00143535	0.000717187	-0.000159498	0.000217389	0.00127363	0.000708298	0.00139909	0.000375046	0.000773317	0.000541335	0.00120784	0.00090176	-0.000244586	-0.00165137	0.00064597	0.00251129	-0.00088175	-0.000447524	-0.000365045	-0.000488347
711	0.000162171	0.000531872	0.00143447	0.000650129	-8.49166e-05	0.000136927	0.00128511	0.000751993	0.00140838	0.000469347	0.000741718	0.000605067	0.00119237	0.000720888	-0.000146443	-0.00191455	0.000628706	0.00252492	-0.00073984	-0.000334779	-0.000354617	-0.000474855
710	0.00010816	0.000451766	0.00143693	0.000538484	-8.27388e-05	0.000190068	0.00125298	0.00067167	0.00144546	0.000369463	0.000565925	0.000565787	0.00125748	0.000709272	-7.1268e-05	-0.00181306	0.000661273	0.0025051	-0.000686222	-0.000347072	-0.000381858	-0.000430365
709	0.000252809	0.000605345	0.00161466	0.000677491	3.82116e-05	0.000319353	0.00133748	0.000707268	0.00153862	0.000502154	0.000627044	0.000821012	0.00138874	0.000794672	-4.59838e-05	-0.0016517	0.000726633	0.00258355	-0.000799213	-0.000562084	-0.000421849	-0.000493305
708	0.000141185	0.000513796	0.00155552	0.000814458	6.42864e-05	0.000184623	0.00125443	0.000679986	0.00135201	0.000418247	0.000563629	0.000785968	0.0011919	0.000840233	-0.000102586	-0.00169632	0.000528743	0.00261651	-0.000838851	-0.000605485	-0.000429553	-0.000583509
707	0.000139323	0.000403853	0.0014257	0.000711208	-3.76173e-06	0.000121861	0.00125114	0.000694003	0.00132534	0.000448697	0.000595802	0.000728294	0.00109231	0.000830977	-0.000125887	-0.00171556	0.000464654	0.00259744	-0.000913294	-0.000562718	-0.000392847	-0.000635677
706	0.000143322	0.000432067	0.00139	0.000728512	6.72957e-05	0.000238831	0.00128305	0.000755577	0.00154182	0.000446222	0.000643833	0.000674462	0.00115838	0.000803108	-3.93244e-05	-0.00177474	0.000505343	0.00257479	-0.000705659	-0.000284663	-0.00014506	-0.000493915
705	0.000118831	0.000527615	0.00152917	0.000761516	0.000202124	0.000275003	0.00136048	0.000857797	0.00157182	0.000388885	0.000806043	0.000758903	0.00136706	0.000757517	-2.14414e-06	-0.00183018	0.0007239	0.00250391	-0.000693309	-0.000387697	-0.000188817	-0.000512627
704	0.000183019	0.000513716	0.00134274	0.000780919	5.44463e-05	0.000141441	0.00136565	0.000797609	0.0014236	0.000336062	0.000688578	0.000708278	0.00136185	0.000842129	-0.000211457	-0.00181333	0.00069596	0.00260107	-0.0010736	-0.00060837	-0.000555983	-0.000692201
703	0.000167358	0.000348536	0.00126421	0.000576122	-6.73155e-05	6.51377e-05	0.00128384	0.00067359	0.00138137	0.000211034	0.000552839	0.000559174	0.00127139	0.00073968	-0.000169045	-0.00174609	0.000685888	0.00259036	-0.00099823	-0.000543434	-0.000493897	-0.000659078
702	0.000161042	0.000495066	0.00147748	0.000499719	-4.47844e-05	0.000110338	0.00128307	0.000662959	0.00145855	0.000196007	0.000608809	0.000522269	0.00122249	0.000697115	1.55226e-05	-0.00176064	0.00061869	0.00268878	-0.00081642	-0.000406824	-0.000262631	-0.000471034
701	9.64592e-05	0.000519675	0.00140036	0.000529773	-3.1975e-05	5.43868e-05	0.00136045	0.000635795	0.00140474	0.000281953	0.00055163	0.000508351	0.00116808	0.000626522	-1.52422e-05	-0.00180337	0.000611387	0.00272453	-0.000838039	-0.00041144	-0.000347882	-0.000493996
700	0.000203867	0.000625539	0.00155051	0.000740174	8.4105e-05	0.000105072	0.00139456	0.000821744	0.00149266	0.000443669	0.000752964	0.000679273	0.00133792	0.000683491	-8.60429e-05	-0.00176668	0.0005746	0.00264512	-0.000863402	-0.000221327	-0.000455803	-0.000374293
699	0.000168507	0.000665691	0.00150094	0.000697151	7.38491e-05	9.933e-05	0.00120004	0.000884227	0.00142839	0.000425256	0.000728552	0.00068052	0.00132146	0.000764812	-0.000213308	-0.00161622	0.00061774	0.00254084	-0.000884113	-0.000293553	-0.000557787	-0.00050534
698	0.000166369	0.000569707	0.00146699	0.00064118	0.000119347	9.71721e-05	0.00130924	0.00079072	0.00132835	0.000430562	0.000742431	0.000690717	0.00129317	0.000884048	-0.000179332	-0.00162947	0.000596971	0.00250303	-0.00076027	-0.00026479	-0.000214757	-0.000394984
697	0.000125247	0.000626153	0.00152291	0.000707723	0.00012883	0.000143818	0.00131627	0.000667334	0.00141454	0.000406962	0.000667235	0.000667948	0.00120566	0.000858218	-9.84548e-05	-0.00173097	0.000576121	0.00257759	-0.000704794	-0.000167537	-0.00017453	-0.0002892
696	0.000158449	0.000619243	0.00152006	0.000798798	0.000100161	0.000164012	0.00123675	0.000693944	0.00145498	0.000436997	0.000612571	0.0007062	0.00129353	0.000753568	-0.000107187	-0.00169213	0.000615581	0.00256599	-0.000740152	-0.000182523	-0.000442143	-0.000373917
695	0.000155816	0.000556937	0.00146611	0.000764248	0.000102755	0.000189216	0.00134069	0.000760546	0.00142253	0.000566697	0.00063532	0.000758705	0.00131788	0.000881414	-0.000219605	-0.00177796	0.000600336	0.00255189	-0.000557353	-0.00033414	-0.000485957	-0.000504647
694	0.000184049	0.000550483	0.00152307	0.000817705	0.000115209	0.000259027	0.00138389	0.000810182	0.00152256	0.000632805	0.000693587	0.000788007	0.00138424	0.000946877	-0.000184075	-0.0017495	0.000564836	0.00254787	-0.000562124	-0.00027841	-0.000245507	-0.000252118
693	0.000183712	0.000483108	0.00148823	0.000793095	0.000110279	0.000151183	0.00127016	0.000782206	0.00154031	0.000512805	0.000664305	0.000718375	0.00135548	0.000798537	-5.05345e-05	-0.00166666	0.00065132	0.0025438	-0.000815547	-0.000428303	-0.000312323	-0.000320107
692	0.000233307	0.000486414	0.00153945	0.000755399	0.000132117	0.000160547	0.00128683	0.000815923	0.00157407	0.000425374	0.00073762	0.000697072	0.00139452	0.000884664	-8.69646e-05	-0.00164841	0.000636727	0.00253275	-0.000929645	-0.000495303	-0.000362093	-0.00046776
691	0.000125662	0.000534168	0.00151672	0.00083107	0.000153004	0.000167734	0.00134902	0.000826337	0.00153505	0.000367365	0.000746964	0.000688954	0.00128846	0.000851962	-0.000241156	-0.0016865	0.000557231	0.00265457	-0.0010466	-0.00050384	-0.000427453	-0.00049891
690	0.000323431	0.000619679	0.00166244	0.000881734	0.000229961	0.000252611	0.00149387	0.000917272	0.00162555	0.000438342	0.000681648	0.000766684	0.00134902	0.000843439	-0.000112045	-0.00170627	0.000548046	0.00262436	-0.000768107	-0.000263773	-0.000290107	-0.00048689
689	0.000265877	0.000581883	0.00166321	0.000820002	0.000143006	0.000331648	0.00149629	0.00087138	0.00162339	0.000481049	0.000660563	0.000819804	0.00135358	0.000789756	-0.00012715	-0.00171952	0.000768506	0.00261333	-0.000766505	-0.000126217	7.97996e-06	-0.000433887
688	0.000161696	0.000532228	0.00154014	0.000824397	9.55483e-05	0.000261956	0.00139497	0.000806796	0.00154236	0.000395241	0.000742846	0.000788383	0.00139278	0.000722881	-0.000194469	-0.00187248	0.00074178	0.00271721	-0.000905612	-0.00029597	-0.000175677	-0.000488495
687	0.00010521	0.000427829	0.00144972	0.000723622	4.97542e-05	8.59461e-05	0.001259	0.000656444	0.00151454	0.000312582	0.000608076	0.000701289	0.00143855	0.000805072	-0.000149109	-0.00182643	0.000683211	0.00264229	-0.000824952	-0.00030686	-0.00025835	-0.00043921
686	0.000134057	0.000458577	0.00137169	0.000717009	8.39453e-06	-5.74147e-06	0.00128763	0.000658761	0.00148425	0.000380115	0.00066476	0.000686935	0.00134285	0.000965923	-0.000181103	-0.00170753	0.000766742	0.00260498	-0.000744409	-0.000275437	-0.00031153	-0.000346157
685	0.000143916	0.000460042	0.00140389	0.000778979	-3.61723e-05	-4.8032e-05	0.00126335	0.000559214	0.0014593	0.000359722	0.000611779	0.000786106	0.00134182	0.000955514	-0.000231311	-0.00166376	0.000651973	0.00261935	-0.000876846	-0.000520867	-0.000539517	-0.000615326
684	0.000111981	0.000560817	0.00141891	0.000784463	2.99948e-05	6.5177e-05	0.00139707	0.000712119	0.00149011	0.000405397	0.000729759	0.000798263	0.00127921	0.000940578	-0.000101565	-0.00183688	0.000759754	0.00258936	-0.000899175	-0.000616173	-0.000458437	-0.000770265
683	9.1569e-05	0.000414565	0.0014359	0.000705704	2.23529e-05	5.91585e-05	0.00142262	0.000708337	0.00147583	0.000327866	0.000685153	0.000693152	0.00115778	0.000914091	-0.000143852	-0.0018806	0.000652128	0.00261334	-0.000929333	-0.00066322	-0.000565887	-0.00071414
682	8.01848e-05	0.000287754	0.0013532	0.000682401	-2.77105e-07	5.17933e-05	0.00124308	0.000605266	0.0014162	0.00019375	0.000584972	0.000513934	0.00112872	0.000898857	-0.00027793	-0.00194503	0.000733283	0.00269649	-0.00111621	-0.00047495	-0.000365327	-0.000567329
681	0.000198046	0.000458854	0.00145797	0.000679966	4.80711e-05	0.000178822	0.00135599	0.000696458	0.00146508	0.000319273	0.000675234	0.000597049	0.00122597	0.000889615	-0.000325843	-0.00192613	0.000711447	0.00268024	-0.000945627	-0.000295457	-0.000219037	-0.000461648
680	3.21731e-05	0.000374373	0.00129705	0.000507559	-0.000175515	-5.19713e-05	0.00116484	0.000526764	0.00132586	0.000246395	0.000395439	0.000536921	0.00119881	0.000814112	-0.000299842	-0.00178269	0.000633498	0.00267094	-0.000857383	-0.000372493	-0.000250313	-0.000592913
679	-7.04833e-05	0.000230199	0.00106394	0.000415693	-0.000376076	-0.000141897	0.00100878	0.000375818	0.00113713	7.07407e-05	0.00040025	0.000437887	0.00111946	0.000874764	-0.000135436	-0.00173736	0.000717166	0.00261902	-0.000940753	-0.000373083	-0.000421017	-0.000652464
678	8.23425e-05	0.000359148	0.00122496	0.000637953	-0.000141224	1.10478e-05	0.00125442	0.000567232	0.00130813	0.000192522	0.000634092	0.000636369	0.00115844	0.000911753	-7.05906e-05	-0.00173455	0.00062338	0.00261803	-0.00102787	-0.000331527	-0.000417197	-0.000587364
677	0.000246672	0.000521735	0.00137506	0.000753261	0.000123207	6.63457e-05	0.00136148	0.000727087	0.00139763	0.00035408	0.000735956	0.000795927	0.0013277	0.000801405	-6.78404e-05	-0.00177389	0.000519693	0.00255363	-0.000882687	-0.000403653	-8.682e-05	-0.000505287
676	0.000335984	0.00063823	0.00153042	0.000795154	0.000155242	0.000160231	0.00141392	0.000774564	0.00150011	0.000367008	0.000751399	0.000799035	0.00139167	0.000821511	-1.56501e-05	-0.00175908	0.000619359	0.00250958	-0.000784425	-0.000416247	-0.000177613	-0.000489524
675	0.000247483	0.000558323	0.00148637	0.000777098	0.000144986	0.000130137	0.00143293	0.000823467	0.00160435	0.000388846	0.000688479	0.000776365	0.00138306	0.000856597	-0.000163422	-0.00168062	0.00059156	0.00259677	-0.000807605	-0.000292227	-0.000307233	-0.00044521
674	0.00033733	0.00052514	0.00152889	0.000844235	0.000185058	8.20857e-05	0.00133291	0.000718158	0.00167226	0.000397775	0.000709466	0.000630252	0.00142275	0.00086597	-0.000159821	-0.00167044	0.000662204	0.00261641	-0.000776803	-0.00022745	-0.000207867	-0.000319477
673	0.000382886	0.000691706	0.00155633	0.000822695	0.000205827	0.000143798	0.00131847	0.000719088	0.00165165	0.00037271	0.000771238	0.000731502	0.00149219	0.000793414	-0.000108442	-0.00162199	0.000777059	0.00253355	-0.000900346	-0.0003955	-0.00023305	-0.000413377
672	0.000239643	0.000643021	0.0015341	0.000792837	0.000156904	0.000127682	0.00138019	0.000656326	0.00154677	0.000289952	0.000756626	0.000712712	0.00143477	0.000685819	-8.64421e-05	-0.00172474	0.000774269	0.00259661	-0.000946437	-0.000385857	-0.00017237	-0.0002853
671	0.000214796	0.000571252	0.00154269	0.00080844	0.000251938	0.000281062	0.00147852	0.000679907	0.00164264	0.000392727	0.000837741	0.000698616	0.00139462	0.000818359	-0.000164705	-0.00176826	0.000750328	0.00259264	-0.000962651	-0.000360077	-0.000188563	-0.000240133
670	0.000273064	0.000601048	0.00149078	0.000706259	0.000135601	0.000227566	0.00136613	0.000753498	0.00163289	0.000435967	0.000744707	0.000747123	0.00144265	0.000816684	-0.000143955	-0.00172039	0.000673392	0.00263384	-0.000756926	-0.000252259	-0.000238717	-0.000335294
669	0.000295	0.000745321	0.00152123	0.000724552	0.000131166	0.000130968	0.00146998	0.000768268	0.00162084	0.000494472	0.000724433	0.000786205	0.0014357	0.000852054	-8.6422e-05	-0.00182545	0.000581411	0.00256971	-0.000691466	-0.00030971	-0.00027518	-0.000474037
668	0.000195789	0.000706535	0.00136736	0.000700635	-2.54016e-05	9.5687e-05	0.00135906	0.000728274	0.00153953	0.000481721	0.000709921	0.000659494	0.0013337	0.000869049	-0.000121164	-0.00195731	0.000512052	0.00264243	-0.0006805	-0.00042084	-0.000166227	-0.000376173
667	0.000220755	0.000674759	0.00142948	0.000740273	7.769e-05	0.000155677	0.00147696	0.000812181	0.00156873	0.000517755	0.000794818	0.000798125	0.0013634	0.000936761	-5.52159e-05	-0.00171478	0.00059665	0.00269971	-0.000888408	-0.000494434	-8.89767e-05	-0.000329628
666	0.000197096	0.00060877	0.00145142	0.000704516	0.000139264	6.981e-05	0.00139798	0.000695983	0.00149644	0.00040522	0.000775474	0.000799213	0.00118566	0.000938477	3.16057e-05	-0.00167298	0.000642963	0.00263695	-0.000824161	-0.000547454	-0.000279953	-0.00037556
665	0.000264035	0.000619421	0.00148967	0.000774544	6.98298e-05	9.62216e-05	0.00140761	0.000700814	0.00156122	0.000421197	0.000728175	0.00071786	0.00127796	0.00086762	-2.63065e-05	-0.00183133	0.000732473	0.00263487	-0.000669215	-0.000270033	-0.000319963	-0.000155677
664	0.000326955	0.000615996	0.00145217	0.000838038	9.31331e-05	4.96151e-05	0.00145006	0.000795016	0.00154725	0.000439749	0.000777375	0.00068743	0.0013336	0.000858504	-0.00010641	-0.00178375	0.000729031	0.00263954	-0.000602473	-5.385e-05	-0.000148017	-0.00020264
663	0.00024489	0.000479207	0.00140582	0.000708654	3.08859e-05	1.43343e-05	0.00137197	0.000882269	0.00156119	0.000392925	0.000720435	0.00063732	0.00128695	0.000805943	-8.27493e-05	-0.00176966	0.000632923	0.00269506	-0.000631715	-0.000230633	-0.00018696	-0.000410049
662	7.11167e-05	0.00049168	0.00131162	0.000620609	-3.29649e-05	5.96337e-05	0.00140218	0.000792698	0.00148288	0.000318264	0.000646961	0.000703468	0.00130315	0.000801101	-8.04874e-05	-0.00176209	0.000545694	0.00266182	-0.00055583	-0.000401577	-0.000154357	-0.000407002
661	0.000229546	0.000640566	0.00144599	0.000691112	8.29168e-05	0.000130018	0.00150395	0.000791868	0.00155918	0.000497501	0.000724948	0.000743321	0.00145944	0.000790737	-2.22992e-05	-0.00183665	0.000642427	0.00261122	-0.0006153	-0.0002494	-0.000142787	-0.000288247
660	0.000266273	0.000721286	0.00152084	0.000714792	0.000184108	0.000156746	0.00147831	0.000885298	0.00154893	0.000533396	0.000703784	0.000804321	0.00141972	0.000691965	1.43467e-05	-0.00178157	0.00066116	0.00261434	-0.000535337	-0.00019468	-0.000150707	-0.00035378
659	0.000210341	0.000665434	0.00152281	0.000674125	0.000213034	0.000185969	0.00143521	0.00086542	0.00164719	0.000614749	0.000808578	0.000842452	0.00144675	0.000659463	-3.8691e-05	-0.00158718	0.000652882	0.00254808	-0.000540283	-0.00030068	-0.000126377	-0.000299497
658	0.000378452	0.000682302	0.00149797	0.000754587	0.00025964	0.000230595	0.00151537	0.000940298	0.00172791	0.000602335	0.000851898	0.00095598	0.00150644	0.000787906	-8.95917e-05	-0.00147538	0.000645855	0.0025455	-0.00067127	-0.000231703	-6.587e-05	-0.000308343
657	0.000335647	0.000721721	0.00140063	0.000749004	0.000201491	0.000264094	0.00149321	0.000872172	0.00160791	0.000532485	0.000738253	0.000853442	0.00151713	0.000814367	-5.99718e-05	-0.00163086	0.000638307	0.0026626	-0.000783314	-0.000261087	5.18933e-05	-0.000378053
656	0.000311671	0.000700972	0.00144663	0.000732868	0.00020945	0.000220597	0.00148476	0.000833485	0.00144431	0.000507539	0.000684401	0.000716633	0.00144709	0.00090331	0.000119884	-0.00173927	0.000493049	0.00264785	-0.000679569	-0.000478473	-0.000109447	-0.000357087
655	0.000270311	0.000658564	0.00143984	0.000737065	0.000130612	0.000173614	0.00138187	0.000812182	0.00148779	0.0005035	0.000625282	0.000735996	0.00143184	0.000887101	1.55857e-05	-0.00170759	0.000637932	0.00263921	-0.000851501	-0.00041427	-0.00019282	-0.00034408
654	0.000220914	0.000615383	0.00145384	0.000636567	6.55367e-06	0.000153816	0.00135987	0.000828575	0.00153097	0.000448321	0.000754547	0.000780147	0.00137619	0.000813476	-0.000104773	-0.00178479	0.000691963	0.00263802	-0.000818716	-0.000424287	-0.000224913	-0.000291577
653	0.000241385	0.000590317	0.0014301	0.000707545	0.000116931	0.00014358	0.00127879	0.000719345	0.00147227	0.000368612	0.000767872	0.000690498	0.00135296	0.000763176	2.18194e-05	-0.00175941	0.000678521	0.00249788	-0.000804678	-0.000588833	-0.0003305	-0.000379203
652	0.000262788	0.000633538	0.00152353	0.000766209	0.000102933	0.000215409	0.00127557	0.000797213	0.0015574	0.000397716	0.000788778	0.000782008	0.00138818	0.00071355	-7.53646e-05	-0.00162004	0.000734507	0.00246875	-0.000710557	-0.00050764	-0.000199277	-0.000399183
651	0.000251205	0.000686163	0.0014475	0.000852036	0.000147064	0.000303157	0.00134878	0.000871122	0.0015774	0.000580893	0.000891197	0.000885832	0.00149997	0.000783626	-0.000140229	-0.00165192	0.000712019	0.002523	-0.000744133	-0.00053415	-0.00026748	-0.000414607
650	0.000204897	0.000636191	0.00135152	0.000692182	0.000102913	0.000198323	0.00137308	0.000752151	0.00149852	0.000532109	0.00077694	0.000689886	0.00141634	0.000879101	-3.32102e-05	-0.00171618	0.000571449	0.00265116	-0.000899277	-0.000567253	-0.00028603	-0.0005112
649	0.000308602	0.000660405	0.00141406	0.00074843	6.90974e-05	0.000211727	0.00144364	0.000815506	0.00159205	0.000549295	0.000783375	0.000691885	0.00157568	0.000847548	-0.000120347	-0.00170959	0.000684462	0.00265555	-0.000795038	-0.000493503	-6.86433e-05	-0.000355567
648	0.000422187	0.000666621	0.00154214	0.000867004	0.000234337	0.000356891	0.00144115	0.000897256	0.00168196	0.000636903	0.000801193	0.000724572	0.00160179	0.000736918	-0.000193994	-0.00176729	0.000612293	0.00255215	-0.00072978	-0.000302903	-6.95333e-05	-0.000329136
647	0.000327886	0.000604731	0.00154806	0.000762586	0.000174011	0.000268312	0.00137428	0.000905572	0.00149595	0.000538702	0.000790482	0.000605503	0.00151496	0.000851995	-0.000181876	-0.00172203	0.000637063	0.002521	-0.00063599	-0.000168013	-2.637e-05	-0.000227923
646	0.000303692	0.00053892	0.00155142	0.00077395	0.000149302	0.000235683	0.00144964	0.000860906	0.00147197	0.000459943	0.000697131	0.000690736	0.00146631	0.00076741	-3.2278e-06	-0.00164912	0.000755181	0.00266842	-0.000763975	-0.000305753	-0.000131303	-0.000293377
645	0.000207787	0.000703427	0.00148269	0.000760982	0.000203293	0.000233485	0.00160623	0.000830653	0.00146893	0.000428582	0.000738551	0.00088898	0.00147842	0.000759178	-4.80948e-05	-0.00175925	0.000659377	0.00271352	-0.000687588	-0.000207093	-0.00014611	-0.000384787
644	0.000240554	0.000831445	0.00163276	0.000934438	0.000282804	0.000342676	0.00170429	0.000986529	0.00164301	0.000636488	0.000858609	0.00101498	0.00153911	0.000837329	-0.0001325	-0.00178384	0.00064211	0.00268848	-0.000638747	-5.05267e-05	-0.00016619	-0.000447828
643	0.000217093	0.000709703	0.00156271	0.000851363	0.000123979	0.000356891	0.00150379	0.000855342	0.00159233	0.000587189	0.000796006	0.000932122	0.00141147	0.000755806	-0.000182131	-0.00157683	0.000648108	0.00260764	-0.000689328	-0.000254153	-0.000201923	-0.000465069
642	0.00019662	0.000652643	0.00150442	0.000762764	0.000140947	0.00028126	0.00134861	0.000843326	0.00157865	0.000474317	0.000778365	0.000852154	0.00133162	0.000781432	-0.000116104	-0.00162991	0.000574458	0.00262711	-0.000847086	-0.000428623	-0.000322283	-0.000483087
641	0.000255918	0.000610591	0.00150858	0.000834355	0.000151103	0.000129285	0.00136336	0.00087328	0.00156354	0.000414485	0.000826951	0.000877221	0.00140529	0.000912092	-3.16363e-05	-0.00162884	0.000617938	0.00266472	-0.00074835	-0.000282903	-0.00017312	-0.00030763
640	0.000244256	0.000491977	0.00139335	0.000781	8.63222e-05	0.000128909	0.00132004	0.000786087	0.0015621	0.00037958	0.000802797	0.000760507	0.00135281	0.000898935	4.733e-06	-0.0017248	0.000705372	0.00262236	-0.000787948	-0.00028417	-0.00019359	-0.000349563
639	0.000393914	0.000747618	0.00159338	0.000803569	0.000139224	0.000151301	0.00154784	0.000918896	0.00158103	0.000515399	0.000887496	0.000819724	0.00153717	0.000845273	-4.42105e-05	-0.00166311	0.000625579	0.0026023	-0.000782126	-0.000334693	-0.000285737	-0.000430107
638	0.000340795	0.000702002	0.00160369	0.000826536	0.000109328	0.000151856	0.00162894	0.000925153	0.00166077	0.000574835	0.000906066	0.000915987	0.00148862	0.000885407	-5.85159e-05	-0.00159116	0.00059406	0.00258949	-0.000758743	-0.00045038	-0.000145977	-0.00034796
637	0.000190978	0.00065405	0.00156251	0.000770822	7.56905e-05	0.000211529	0.00148284	0.000821606	0.00155889	0.000546265	0.000864846	0.000842275	0.00145077	0.000865752	-8.72432e-06	-0.00157502	0.000639579	0.00269694	-0.000724511	-0.000242633	-9.43434e-05	-0.00021737
636	0.000247206	0.000765694	0.00148092	0.000734867	5.38919e-05	0.00022226	0.00136676	0.000834871	0.00152044	0.000494947	0.000806024	0.000807014	0.00137925	0.000836754	-0.000126466	-0.00158365	0.000617382	0.00259426	-0.000658959	-0.00033919	-0.000156487	-0.00028854
635	0.000355247	0.000743836	0.00148846	0.000966215	0.000153222	0.000307315	0.00148625	0.000927923	0.00169536	0.000467684	0.000949763	0.000831287	0.00144962	0.000819201	3.33486e-06	-0.00165009	0.000732669	0.00247557	-0.000683547	-0.000377977	-0.00035382	-0.000369663
634	0.000331825	0.00073946	0.00148874	0.000946437	0.00020648	0.000229071	0.00146619	0.000964136	0.00170207	0.000536029	0.000905195	0.000804678	0.00137274	0.000867638	0.000170298	-0.00170481	0.000734629	0.00253685	-0.000504093	-0.000314323	-0.000395043	-0.000394487
633	0.000355386	0.000765377	0.00151585	0.000872092	0.000258828	0.000295317	0.00157893	0.00100446	0.00168887	0.000624609	0.000917372	0.000816636	0.00142483	0.000854144	3.47187e-05	-0.00182456	0.000684972	0.00270658	-0.000442717	-0.000318937	-0.000268947	-0.000442797
632	0.000272608	0.000784167	0.0015505	0.000805529	0.000200917	0.0003265	0.00156843	0.000905176	0.00168897	0.000501461	0.000872251	0.000831129	0.00146005	0.000810494	-0.000123391	-0.00172386	0.000696496	0.00266994	-0.000693647	-0.000237203	-0.000294187	-0.000405373
631	0.000290625	0.000724968	0.00157463	0.000772366	0.000160052	0.00032745	0.00147782	0.000950238	0.00171389	0.00047891	0.000810538	0.000808538	0.00149064	0.000840851	-3.65939e-05	-0.00162817	0.000686243	0.00265897	-0.000912163	-0.000358967	-0.00040403	-0.000361603
630	0.000195195	0.000638646	0.00151741	0.0007592	0.000229962	0.000322065	0.00155158	0.000977579	0.00161167	0.000518527	0.000820041	0.00071592	0.00145421	0.000898991	2.71608e-05	-0.00164177	0.000604671	0.00261814	-0.000792484	-0.000335013	-0.000361923	-0.000416407
629	0.000318461	0.000707506	0.00154311	0.000880526	0.0001967	0.000338141	0.00160048	0.00100005	0.00159391	0.000563747	0.000896286	0.000803529	0.00139832	0.000823208	-9.93737e-05	-0.00175935	0.000676737	0.00259826	-0.000785155	-0.000342873	-0.000275223	-0.00038926
628	0.000405952	0.000806677	0.00155249	0.000839523	0.000293991	0.000368236	0.00150519	0.000963245	0.00170322	0.000609522	0.000881894	0.000938795	0.00151927	0.000888431	-0.000118378	-0.00174145	0.000713662	0.00260013	-0.000757257	-0.00038263	-0.00036283	-0.000335467
627	0.000415178	0.000733996	0.00160246	0.00082608	0.000314066	0.000310067	0.00145924	0.00102793	0.00163131	0.000558976	0.000853164	0.000863262	0.0015283	0.000868738	-9.99235e-05	-0.00164115	0.000703467	0.00256364	-0.000669157	-0.00027603	-0.000169617	-0.000220517
626	0.000177218	0.00063819	0.00148866	0.000788463	0.000160686	0.000142313	0.0013631	0.000827367	0.0015268	0.000519716	0.000746628	0.000800579	0.00144071	0.000822595	-7.55533e-05	-0.00177358	0.000784088	0.00258688	-0.00073792	-0.00034521	-0.000165833	-0.00029791
625	0.000337251	0.000719583	0.00155741	0.000868211	0.000176089	0.00038459	0.00146997	0.000918738	0.00168295	0.000719563	0.000888802	0.000879536	0.00156962	0.000802724	-1.99177e-05	-0.00179893	0.000714872	0.00253802	-0.000760982	-0.000451807	-0.00025283	-0.000376967
624	0.000354159	0.000719266	0.00155679	0.000845324	0.000183079	0.000315611	0.00151274	0.000924222	0.00168599	0.000718494	0.000915432	0.000899751	0.00153012	0.000839678	6.32588e-05	-0.00177012	0.000669116	0.00267836	-0.000647617	-0.000364413	-0.000184307	-0.000244653
623	0.000370968	0.000676085	0.0016026	0.000976037	0.000240059	0.000265976	0.00152767	0.00102021	0.00170379	0.000620867	0.000969858	0.00091462	0.00151359	0.000856235	7.40104e-05	-0.00171518	0.000697173	0.00284794	-0.000673867	-0.000204107	-0.000146413	-0.000241487
622	0.000166131	0.000624114	0.00152121	0.000729264	6.49397e-05	0.000102775	0.0014727	0.000901731	0.00160359	0.000463329	0.000872725	0.000829624	0.00139215	0.00096197	5.8354e-05	-0.0017066	0.000710892	0.00279663	-0.000786303	-0.00014936	-0.00015873	-0.000226677
621	0.000368651	0.000881694	0.00168239	0.000859303	0.000196502	0.000317432	0.00166529	0.000986804	0.00173217	0.000592673	0.000977757	0.000969304	0.00150993	0.000900699	2.88739e-05	-0.0016082	0.000634626	0.00271247	-0.00074431	-0.000234713	-8.139e-05	-0.000287397
620	0.000624569	0.000935586	0.00167772	0.00110423	0.000420405	0.000521339	0.0016458	0.00106954	0.00180168	0.000738312	0.00106531	0.00101932	0.00165462	0.000782351	1.51525e-05	-0.00167692	0.000768048	0.00249506	-0.000798519	-0.00022402	-0.000312897	-0.000404903
619	0.000564064	0.000838434	0.00172874	0.00102723	0.00042977	0.000432422	0.00162347	0.000998209	0.00188941	0.00080741	0.000986924	0.000958374	0.0016736	0.000762478	-2.22029e-05	-0.00160918	0.000777436	0.0026186	-0.000848198	-0.000329356	-0.00034539	-0.000556822
618	0.000421276	0.000786681	0.00169465	0.000950258	0.000359326	0.000421989	0.00162292	0.000946535	0.00186101	0.000784127	0.000954633	0.00100662	0.00173682	0.000811984	6.96227e-05	-0.00155872	0.000746371	0.00270382	-0.000755061	-0.000304643	-0.0002971	-0.000416943
617	0.000376116	0.000783968	0.0016067	0.000857718	0.000228813	0.00038647	0.00142509	0.000973757	0.00167055	0.000655475	0.000927191	0.000884032	0.00157311	0.000835135	-1.43307e-06	-0.00153248	0.000751658	0.00271557	-0.000803333	-0.000509897	-0.000302307	-0.000446243
616	0.000357802	0.000734788	0.00159375	0.00089179	0.000145698	0.000310919	0.00147302	0.000937329	0.00165994	0.000618154	0.000927903	0.000892505	0.00149902	0.000863395	-3.08715e-05	-0.00169424	0.000706198	0.00276997	-0.000619897	-0.000312487	-0.00024541	-0.00033474
615	0.000421534	0.00080541	0.00169698	0.00101276	0.000282884	0.000392865	0.00166614	0.00102541	0.00168687	0.000667909	0.000907255	0.000877418	0.0014983	0.000814226	6.15517e-05	-0.0017234	0.000730651	0.002663	-0.000768528	-0.000251583	-0.000252257	-0.000382933
614	0.000477801	0.000884941	0.00169679	0.00112934	0.000419217	0.00048378	0.00171314	0.00109564	0.00180241	0.000748826	0.00109293	0.00104693	0.00159023	0.000863257	8.57099e-05	-0.00164743	0.000618311	0.00259499	-0.000695905	-0.000369423	-0.000327823	-0.000441292
613	0.000530249	0.000784028	0.00160172	0.000877062	0.000305217	0.00049471	0.00152365	0.00106768	0.00177875	0.000681312	0.00100445	0.00100292	0.00158192	0.000916855	-2.77807e-05	-0.00169461	0.000671787	0.00258537	-0.000609343	-0.00027431	-0.0004168	-0.000482628
612	0.000514014	0.000778781	0.00161037	0.00082416	0.000234812	0.00033725	0.00147015	0.00103246	0.0016741	0.000671294	0.000959029	0.00099342	0.0016169	0.000879165	-8.67372e-05	-0.00172428	0.000783751	0.00270708	-0.0004759	-0.00016029	-0.000221983	-0.000345585
611	0.000537653	0.000946931	0.00170791	0.000994092	0.000492908	0.000313235	0.00169281	0.00112757	0.00172296	0.000839622	0.00107778	0.00107059	0.00169558	0.000849198	3.86867e-05	-0.00154839	0.000777852	0.00270175	-0.000387323	-0.000218953	-0.000186327	-0.000269638
610	0.000630429	0.00099122	0.00165248	0.00105683	0.000550225	0.000500016	0.00177658	0.00111164	0.00183158	0.000731897	0.00112955	0.00104575	0.00163624	0.000762823	9.57293e-05	-0.00154319	0.000739165	0.00263049	-0.000614432	-0.000201333	-0.0001788	-0.000242314
609	0.000504728	0.000995774	0.00167562	0.000979698	0.00039336	0.000432621	0.00175715	0.0010385	0.00172071	0.000658266	0.00105056	0.00102351	0.00157803	0.00070985	-3.65812e-05	-0.00161313	0.00071592	0.00264049	-0.000578439	-0.000159143	-0.000185022	-0.000420883
608	0.000471406	0.000972214	0.001699	0.000895672	0.000397003	0.000417514	0.00168338	0.000936339	0.00174725	0.000719702	0.00102068	0.00104034	0.00153194	0.000820574	-8.12891e-06	-0.001665	0.00064312	0.00263527	-0.00044478	-1.968e-05	-6.14967e-05	-0.000183137
607	0.000437135	0.000901236	0.00152584	0.000833524	0.00040617	0.000331569	0.00152438	0.00101844	0.00168344	0.000637636	0.000944654	0.000915392	0.0014397	0.000907994	7.4726e-05	-0.00166156	0.000683966	0.00258765	-0.000675907	-0.000290923	-0.000271757	-0.00036257
606	0.000389757	0.000860451	0.00154504	0.000818714	0.00036087	0.000379363	0.00150628	0.000892049	0.0016071	0.000596435	0.000893574	0.000903412	0.00141562	0.000960883	8.3398e-05	-0.00156662	0.000745857	0.00257941	-0.000600137	-0.000341153	-0.00019114	-0.000287597
605	0.000507737	0.00104994	0.00169736	0.001038	0.00050352	0.000537653	0.00160658	0.000950713	0.0017075	0.00076898	0.000985578	0.00103994	0.00163387	0.000983227	0.000195567	-0.00160006	0.000604434	0.00268009	-0.000481819	-0.000251403	-0.000160427	-0.000261123
604	0.00040516	0.000866864	0.00154426	0.000912245	0.000412862	0.000438897	0.00159363	0.000933053	0.00165236	0.000721206	0.000979698	0.000917548	0.00155665	0.000989861	0.000209021	-0.00161154	0.0006648	0.00263525	-0.000526807	-0.00018581	-0.000259223	-0.000431493
603	0.000494096	0.00094125	0.00175107	0.000791571	0.000494373	0.000401379	0.00183286	0.000983777	0.00173132	0.000705645	0.00103604	0.00103086	0.00158997	0.000922929	8.86893e-05	-0.00154205	0.00069939	0.00270149	-0.000528007	-0.000362927	-0.0002597	-0.00060663
602	0.00041108	0.000933527	0.00171017	0.000741381	0.000362335	0.000399656	0.00174894	0.00103713	0.00169376	0.000750944	0.00101068	0.00106733	0.00159851	0.00111376	9.89232e-05	-0.00159665	0.000776523	0.00279877	-0.000448597	-0.000256827	-9.97867e-05	-0.000329113
601	0.000501085	0.000934854	0.00175816	0.000830218	0.000533831	0.000507519	0.00180089	0.00110025	0.00164956	0.000692043	0.00106588	0.00117222	0.0016007	0.00127871	0.000145359	-0.001572	0.000759224	0.00267534	-0.000345133	4.88669e-06	-0.000115963	-0.000120203
600	0.000495264	0.00102395	0.00178602	0.000920124	0.000633795	0.000571409	0.00176782	0.00112686	0.00168517	0.000800085	0.00114106	0.00115262	0.00154048	0.00114574	0.000236905	-0.00156141	0.000786956	0.00251838	-0.000342163	-7.76335e-06	-8.577e-05	-0.000123443
599	0.000434363	0.00105952	0.00168222	0.000915531	0.000535356	0.000478138	0.00168104	0.00100724	0.0017333	0.000803352	0.00114704	0.00107564	0.00156877	0.00104656	0.00024312	-0.00149821	0.000742014	0.0025653	-0.000396863	-0.00017803	-7.789e-05	-0.00014774
598	0.000499917	0.00107414	0.00159645	0.000802521	0.000486275	0.000426266	0.00161828	0.000896998	0.00166687	0.000776049	0.00100449	0.00103753	0.00158837	0.00107912	0.000238828	-0.00144847	0.000630488	0.00262751	-0.000413397	-0.00012137	-6.16533e-05	-6.78103e-05
597	0.0006668	0.00117891	0.00169308	0.000976411	0.000590674	0.000642051	0.00181522	0.00107608	0.00173476	0.000988449	0.00124439	0.00124163	0.00167746	0.00109207	0.000384037	-0.00149292	0.000575249	0.00259659	-0.000411357	-7.62334e-06	0.00010244	-1.59967e-05
596	0.000646308	0.00110813	0.00164776	0.000968572	0.000658128	0.000684044	0.00184801	0.00105091	0.00174177	0.000993577	0.00134583	0.00127343	0.00161203	0.00117405	0.000368792	-0.00146098	0.000629674	0.00258665	-0.000445927	0.000108977	6.019e-05	-7.543e-05
595	0.00070604	0.00104654	0.00175848	0.000934597	0.000706318	0.000707961	0.00188685	0.00100809	0.00174189	0.00101162	0.00134785	0.00131687	0.00164802	0.00123018	0.00032314	-0.00143855	0.00060665	0.00263534	-0.000482809	-4.35334e-05	-7.80867e-05	-8.56267e-05
594	0.00065098	0.00108111	0.00175921	0.000957901	0.000737006	0.00076605	0.00193629	0.00111524	0.00171247	0.00109607	0.00133009	0.00132113	0.00160158	0.00118367	0.000237627	-0.00147941	0.000755777	0.00269931	-0.000429671	-0.000135283	-6.322e-05	-0.000354794
593	0.000674581	0.00106357	0.00174474	0.000857282	0.000609958	0.000719088	0.00193253	0.00115711	0.00174551	0.00109873	0.00127094	0.00132055	0.00159136	0.00122503	0.000304178	-0.00136254	0.000688777	0.00274819	-0.000506553	-2.39971e-07	1.69433e-05	-0.00040164
592	0.000700537	0.00103615	0.00162385	0.000739024	0.000513657	0.000655316	0.00185193	0.00103819	0.00169475	0.000951879	0.00129901	0.00121659	0.00164008	0.0012019	0.00048018	-0.0013589	0.000751459	0.00257865	-0.000483423	-0.000109643	-6.46033e-05	-0.00039623
591	0.000759598	0.0012505	0.00172098	0.000914066	0.000698715	0.000787653	0.00195876	0.00110805	0.00168974	0.00106503	0.00144073	0.00135605	0.00167273	0.00117924	0.000453258	-0.00132898	0.000853957	0.00271618	-0.00032014	-4.393e-05	-0.000130353	-0.000405017
590	0.000864588	0.0014374	0.00184001	0.00104923	0.000899355	0.000902681	0.00208332	0.00115474	0.00187719	0.00128731	0.00153915	0.00149294	0.00177784	0.00123965	0.000472167	-0.0013802	0.000793176	0.00280048	-0.000427233	-6.67335e-06	-5.80467e-05	-0.000342993
589	0.000861955	0.0012904	0.00179992	0.000927964	0.000892069	0.000862906	0.00207051	0.00119226	0.0018824	0.00126011	0.00149427	0.00147211	0.00179541	0.00143487	0.00044556	-0.00144787	0.000693369	0.00265284	-0.000542123	-8.18267e-05	-0.00014328	-0.000148407
588	0.000825427	0.0012966	0.00178256	0.000947267	0.000908106	0.000904641	0.00201747	0.00122715	0.00186434	0.00130109	0.00150427	0.00142386	0.00173494	0.0014488	0.000471596	-0.00142628	0.000732058	0.00266432	-0.000515597	-0.000152923	-0.000210163	-0.00012396
587	0.000865657	0.00128066	0.00184169	0.00105471	0.000937051	0.00098635	0.00206455	0.00122037	0.00182102	0.00136648	0.00150448	0.00160244	0.00182061	0.00140822	0.000557387	-0.00139837	0.000709626	0.00274712	-0.000472433	-6.551e-05	-0.000189527	-0.00026449
586	0.000886644	0.00130449	0.00184187	0.000928677	0.000964987	0.000978906	0.00218033	0.00126917	0.00173474	0.00128836	0.00151332	0.00155832	0.00181223	0.00148791	0.000623537	-0.00142292	0.00071101	0.00263922	-0.000489758	-6.09567e-05	-1.657e-05	-0.00032644
585	0.00106921	0.00143897	0.0019289	0.00108202	0.00113054	0.0011267	0.00230845	0.0013233	0.00189056	0.00142036	0.0016932	0.00154956	0.00192022	0.00154322	0.00070186	-0.00130666	0.000780225	0.00270596	-0.000219507	0.000221267	0.000124277	-0.000188802
584	0.00100538	0.00139216	0.00187054	0.00111201	0.00109776	0.00122251	0.00227536	0.00124896	0.00187094	0.00143744	0.00171045	0.00156063	0.00187383	0.0016071	0.000689841	-0.00135	0.000834517	0.00276752	-0.000160473	0.00014433	3.69633e-05	-0.000319413
583	0.0010525	0.00130406	0.00180259	0.000983341	0.00105014	0.00126577	0.0021224	0.00120865	0.0017428	0.00146728	0.00173048	0.00153964	0.00178554	0.0015685	0.000614947	-0.00132261	0.000773094	0.00272388	-0.000116177	8.21434e-05	8.59067e-05	-0.00011986
582	0.00105703	0.00141735	0.00178404	0.00102151	0.00112955	0.00116208	0.00227603	0.00121324	0.00182037	0.00144665	0.00180651	0.00163903	0.00184557	0.00171592	0.000723108	-0.00133228	0.000837387	0.0026983	-4.09e-05	0.000181577	7.583e-05	-5.44467e-05
581	0.00118566	0.00148686	0.00189962	0.00110275	0.00129483	0.00130139	0.00241397	0.00140315	0.00196531	0.00161876	0.00185868	0.00179952	0.00201168	0.00182001	0.000959287	-0.00127283	0.000843048	0.00265223	-0.000134553	0.000122947	-7.68667e-06	-0.000161383
580	0.00128173	0.00158395	0.00204459	0.00114628	0.00132663	0.00147015	0.00246682	0.00154655	0.00194542	0.00180059	0.00202043	0.00189493	0.00215635	0.00177152	0.000983122	-0.00116165	0.000706535	0.00259628	-0.000254193	0.00031898	0.000146413	-0.000239363
579	0.00132594	0.00167966	0.00203457	0.0011253	0.00140668	0.0014989	0.00253368	0.00149224	0.00197587	0.00182737	0.00215798	0.00188075	0.00201943	0.0018066	0.000855227	-0.00121473	0.00072477	0.00267445	-0.00012081	0.000491103	0.000137483	-7.882e-05
578	0.00135274	0.00171217	0.00192797	0.001003	0.00149684	0.00145972	0.00261374	0.00133411	0.00199327	0.00177576	0.0020593	0.0018686	0.00193455	0.00186245	0.000991679	-0.00119071	0.000800106	0.00257694	-4.229e-05	0.00044796	0.00029482	-1.07134e-05
577	0.00142665	0.0017087	0.00195856	0.00104759	0.00156954	0.00152592	0.00265465	0.00148136	0.00198387	0.00189548	0.0021457	0.0018749	0.00197484	0.00190848	0.00106074	-0.00121981	0.000795745	0.00258251	-1.689e-05	0.00037269	0.00033236	-8.97701e-05
576	0.0014362	0.00182799	0.00199062	0.00115523	0.00163099	0.00161573	0.00271923	0.00150284	0.00199464	0.00200707	0.00233424	0.00193277	0.00203309	0.00195146	0.00113101	-0.00117876	0.000889	0.00265424	-8.41233e-05	0.000325367	0.000157517	-0.000232497
575	0.00141044	0.00181914	0.00210333	0.00104901	0.00163513	0.00162136	0.00283042	0.0014812	0.00190691	0.00192891	0.00245494	0.00206354	0.00205712	0.00201686	0.00116404	-0.00104047	0.000930439	0.00263648	9.38467e-05	0.00051924	0.000295637	-0.000144313
574	0.00146863	0.0018453	0.00219631	0.0011387	0.00181992	0.00179159	0.00294856	0.00152468	0.00196617	0.00211638	0.00244278	0.00214643	0.00213483	0.0020837	0.00122798	-0.00102542	0.000980987	0.00263005	-4.52033e-05	0.000484313	-4.32233e-05	-0.000243367
573	0.00151919	0.00183019	0.0021691	0.00122164	0.00188725	0.00185541	0.00290114	0.00154911	0.00198573	0.00221555	0.0024975	0.00223072	0.00213006	0.00221377	0.0013209	-0.000956639	0.000956393	0.00264616	-2.178e-05	0.00057549	0.000214953	-0.000305791
572	0.00168633	0.00194499	0.00228888	0.00122653	0.00207393	0.00198715	0.00293018	0.001544	0.00201986	0.00235668	0.00259323	0.00237679	0.00220274	0.00231721	0.00139269	-0.0010919	0.000906718	0.00271048	-4.21734e-05	0.000475287	0.000157893	-0.000450757
571	0.00168721	0.00186107	0.00224307	0.000962871	0.0019357	0.00193831	0.00294761	0.00150662	0.00182498	0.00233626	0.00254077	0.00221809	0.00210385	0.00239344	0.00133545	-0.00100595	0.000824637	0.00267907	8.371e-05	0.00055741	6.132e-05	-0.000288307
570	0.00174333	0.00211277	0.00227107	0.00109057	0.00210024	0.00209292	0.00307004	0.00158395	0.00190044	0.00250901	0.00274249	0.00234303	0.00223608	0.00243997	0.00150965	-0.000864907	0.000980689	0.00262755	7.88366e-05	0.00052928	0.000135227	-6.884e-05
569	0.00170516	0.00206728	0.00211688	0.00107541	0.00223465	0.0021066	0.00301581	0.00150367	0.00191352	0.00254284	0.00277029	0.00243078	0.00224105	0.002383	0.00157811	-0.000847365	0.00107364	0.00255143	0.0001966	0.00066078	0.000103407	-0.00013881
568	0.00180487	0.00216336	0.00218049	0.00120669	0.00234818	0.00229665	0.00310734	0.00161123	0.00210224	0.00258335	0.00291785	0.00247444	0.00230645	0.00253094	0.00158756	-0.000704637	0.00107608	0.00254547	0.000305633	0.000621007	0.000196603	-0.00020545
567	0.00202766	0.00239172	0.00231104	0.00131184	0.00242651	0.00251409	0.00327864	0.00180815	0.0021911	0.00280312	0.00311152	0.00272861	0.00245719	0.00257559	0.00172516	-0.000743955	0.00102502	0.00256548	0.000272767	0.00051108	0.000102697	-0.000321257
566	0.00195308	0.0023094	0.00236091	0.00121223	0.00247897	0.00249162	0.00339094	0.00184227	0.00201059	0.00289924	0.00314486	0.00280636	0.00236618	0.00255107	0.00166127	-0.00071291	0.00107352	0.00255903	0.000257877	0.00044252	0.000162033	-0.000345543
565	0.00207094	0.00229694	0.00231262	0.00122186	0.00264574	0.00259592	0.00354192	0.00178887	0.00211798	0.00299829	0.00331659	0.00285417	0.00230205	0.00270751	0.00184809	-0.000663591	0.00108259	0.00258958	0.000300047	0.000605877	6.983e-05	-0.000385283
564	0.00221363	0.00241314	0.00226661	0.00126807	0.00282236	0.00269367	0.00356788	0.00182407	0.00210844	0.00316008	0.00337542	0.00280106	0.00235622	0.00288165	0.00194299	-0.000543983	0.00104347	0.00267117	0.000537433	0.000707827	0.000153797	-0.00030979
563	0.00223667	0.00256016	0.00236002	0.00127907	0.00286521	0.00277385	0.00358077	0.00189546	0.0021499	0.0033028	0.00346669	0.00293509	0.00246804	0.00304159	0.00209469	-0.000555801	0.00098354	0.0026972	0.00060257	0.000746847	0.00029007	-0.00017011
562	0.00237093	0.00266492	0.00246438	0.00124815	0.00294525	0.00292977	0.00367874	0.00191683	0.0022186	0.00337562	0.0035795	0.00305555	0.00242227	0.00309212	0.00223039	-0.000528776	0.000943287	0.00272368	0.00039059	0.000619977	0.000162017	-0.00018577
561	0.00242354	0.00268749	0.00247153	0.00125833	0.00304339	0.00300118	0.00375032	0.00198583	0.00217081	0.00344641	0.0037332	0.00309752	0.00246691	0.00308874	0.00238839	-0.000425704	0.00115747	0.00264035	0.000449133	0.000822	0.000252137	-0.00026334
560	0.00244059	0.0027871	0.00249517	0.00131885	0.00316345	0.00305373	0.0038851	0.0020612	0.00224381	0.00359006	0.00394227	0.0032253	0.00257173	0.00305759	0.00247655	-0.000412615	0.00120279	0.002593	0.00080737	0.00106816	0.000579723	-0.000151184
559	0.00264049	0.00287877	0.00259487	0.00134564	0.00334899	0.00325405	0.00397569	0.00200467	0.00233945	0.00369168	0.00401296	0.00336839	0.0025684	0.00317076	0.00247249	-0.000416834	0.00129992	0.00259954	0.00084095	0.000978613	0.000515977	-0.00016215
558	0.00272054	0.00290971	0.00256098	0.00135019	0.00349991	0.00346459	0.00407096	0.00200624	0.00237962	0.00374193	0.00392851	0.00340581	0.0025902	0.00335975	0.00244582	-0.000250978	0.00131446	0.00258275	0.000647697	0.0009165	0.000389143	-0.000155913
557	0.00278738	0.00300399	0.00260604	0.0013685	0.00363343	0.00361282	0.0041673	0.00208383	0.00239205	0.00397265	0.00416012	0.00349249	0.00263568	0.00356222	0.0026073	-0.000154477	0.00131718	0.00264861	0.000667533	0.000983953	0.00061055	-0.00028156
556	0.0028286	0.00298509	0.0025548	0.00125167	0.00361716	0.00358792	0.00419657	0.00204782	0.00229059	0.00406428	0.00433356	0.00362335	0.00265817	0.00360933	0.00269505	-0.000189402	0.00130808	0.00266642	0.00076763	0.00115812	0.000552893	-0.000252793
555	0.0029171	0.0031097	0.00267545	0.00129636	0.00375185	0.00367537	0.00440846	0.00217538	0.00235731	0.00423236	0.00446936	0.00375866	0.00266599	0.00362013	0.0028164	-9.29164e-05	0.00133619	0.00256977	0.00105753	0.0012727	0.00049192	-8.82833e-05
554	0.00303007	0.00319196	0.00274895	0.00137551	0.00392162	0.0037966	0.004624	0.00217189	0.0023622	0.00433771	0.00458351	0.00375757	0.00276045	0.00374108	0.00294982	-9.43645e-05	0.00135326	0.00261245	0.00125565	0.00132197	0.000662957	1.29267e-05
553	0.00317256	0.00325762	0.00279728	0.00144534	0.00405964	0.00391398	0.00471921	0.00221346	0.00238693	0.00445777	0.00477059	0.00396766	0.00282794	0.00393771	0.00311794	-3.13625e-05	0.00154814	0.00261485	0.00125761	0.00131053	0.000694953	-0.000151538
552	0.00340798	0.00335393	0.00288165	0.00145433	0.00415899	0.00412646	0.00473901	0.00231375	0.00238693	0.00463198	0.00495317	0.00406831	0.00288076	0.00411507	0.00309542	8.21657e-05	0.00155536	0.00263542	0.00127309	0.00147756	0.000613423	-0.000157243
551	0.00345849	0.00346092	0.00294489	0.00152252	0.00439137	0.00434074	0.00499974	0.00249299	0.00253211	0.00483389	0.00509713	0.00427772	0.00310629	0.00403228	0.00320386	9.48742e-05	0.001379	0.00265091	0.00122053	0.00149993	0.00076118	-0.000123523
550	0.00341873	0.00357412	0.00281284	0.00144855	0.00451725	0.00450353	0.00498986	0.0024212	0.00252077	0.00501847	0.00517716	0.00434751	0.00305971	0.00407807	0.00326694	0.000185259	0.00140464	0.00276392	0.00121164	0.00145643	0.00073083	-2.19167e-05
549	0.00352351	0.00367295	0.00281906	0.0013627	0.004644	0.00449372	0.00517462	0.00232642	0.00239507	0.00506286	0.00523146	0.00431267	0.00300358	0.00428915	0.0033825	0.000180908	0.00141236	0.00270648	0.00123413	0.00137405	0.000623163	-0.00020157
548	0.00350223	0.00367165	0.00279741	0.00144647	0.00461001	0.00452905	0.00525221	0.00231966	0.00243587	0.00502085	0.0053423	0.00431396	0.0029503	0.00443192	0.00345893	0.000230303	0.00140216	0.00269328	0.00139949	0.00167818	0.00082925	-8.90659e-06
547	0.00359639	0.00374997	0.00279171	0.00144883	0.00477803	0.0047656	0.00522786	0.0024946	0.00261434	0.00519569	0.00540868	0.00450206	0.00311398	0.00457276	0.0035411	0.000344898	0.0014693	0.00264748	0.00142142	0.00173519	0.000787153	3.724e-05
546	0.00392537	0.00395867	0.00300374	0.001556	0.00509442	0.00509622	0.00545226	0.00264912	0.00278292	0.0054052	0.00575559	0.00472539	0.0032766	0.00461138	0.00369729	0.000322687	0.00153262	0.00276776	0.00138973	0.00162351	0.0006388	-0.0001261
545	0.00394114	0.00388881	0.00297653	0.00138668	0.00505747	0.00499491	0.00544004	0.00244656	0.00257927	0.00544232	0.00577437	0.00466791	0.00312615	0.00476757	0.0038065	0.000318495	0.00148361	0.00272274	0.00137736	0.00179249	0.000803787	-1.14667e-05
544	0.00394512	0.00398023	0.00288687	0.00136399	0.00502055	0.00513583	0.00547313	0.00250905	0.0025315	0.00557376	0.00584091	0.00472369	0.00323287	0.00480246	0.00400703	0.00037947	0.00154121	0.00280305	0.00159336	0.00180879	0.000882547	7.03267e-05
543	0.00415808	0.00414903	0.00302171	0.00143109	0.00533915	0.00525336	0.00563841	0.00271969	0.00269775	0.00580992	0.00601842	0.00491506	0.00327848	0.00493758	0.00412287	0.000538599	0.00154905	0.00280027	0.00163858	0.00193558	0.00085762	-6.55333e-05
542	0.00424016	0.0041071	0.00311689	0.00146661	0.00547121	0.00530753	0.00579879	0.00272707	0.00262214	0.00590426	0.00609183	0.00500465	0.00322079	0.00494689	0.00415651	0.000579484	0.00155406	0.00273818	0.0016601	0.00191475	0.000849147	-0.000172607
541	0.00439515	0.00432712	0.00304361	0.00150803	0.00559102	0.00540296	0.00590858	0.00278603	0.00264762	0.00597611	0.00614832	0.00512053	0.0031963	0.00509533	0.00425188	0.000583526	0.00156122	0.00279627	0.00184129	0.00200313	0.000944333	-0.000108263
540	0.00442239	0.00435121	0.0030432	0.0015341	0.00571311	0.0055129	0.0059718	0.00271905	0.00257616	0.006146	0.00629122	0.00522867	0.00317792	0.00529812	0.00436701	0.000498271	0.00159787	0.00275221	0.00172769	0.00207518	0.000858093	-0.000110993
539	0.00458121	0.00436475	0.00321008	0.00160708	0.00596324	0.00581358	0.00619009	0.00282143	0.00274231	0.00637723	0.00646225	0.00537437	0.00339609	0.00545376	0.00436907	0.000506089	0.00161549	0.00279784	0.00173937	0.00202335	0.000810877	-0.00017397
538	0.00481268	0.00456336	0.00335372	0.00163791	0.00610162	0.0059848	0.00637913	0.00293795	0.00279734	0.00653556	0.00665061	0.00548574	0.00357936	0.00549487	0.00444853	0.000705465	0.00167077	0.00288244	0.00187329	0.00210864	0.000908223	-0.00010646
537	0.00476794	0.00463473	0.00333642	0.00167653	0.00612706	0.00595279	0.00638307	0.00298081	0.00276754	0.00657378	0.00689004	0.00555737	0.00358527	0.00557382	0.0045671	0.000821706	0.00174821	0.00276759	0.00194593	0.0021223	0.00098829	-1.564e-05
536	0.00486131	0.00463331	0.00338581	0.00164173	0.00622952	0.00608536	0.00640717	0.00302324	0.0027393	0.00666067	0.00691869	0.00560534	0.00352828	0.00563774	0.00460971	0.000877675	0.00169797	0.00270124	0.00195811	0.00223763	0.00111894	-0.00013724
535	0.00487564	0.00448761	0.00326993	0.00149795	0.00625192	0.00613716	0.00635829	0.00292593	0.00268225	0.00673007	0.0068668	0.00561871	0.00341987	0.00565742	0.00471731	0.000977026	0.00170279	0.00271983	0.00214859	0.00243571	0.00131085	-2.80167e-05
534	0.00504625	0.00463046	0.00340169	0.0015717	0.00644261	0.0063451	0.00651523	0.00307008	0.00280815	0.00695017	0.00697713	0.00573164	0.00353753	0.00566628	0.00487125	0.000935745	0.00175078	0.00274904	0.00227073	0.00242985	0.00115474	-0.00011273
533	0.00517201	0.00478692	0.00345554	0.00166693	0.00647721	0.00638329	0.00652925	0.00307283	0.00280262	0.00699812	0.0071595	0.00588567	0.00361035	0.00584126	0.00503291	0.000936957	0.00186597	0.0026409	0.00235824	0.00242372	0.00124138	-4.38533e-05
532	0.00524695	0.00481462	0.00347679	0.00169028	0.0066616	0.00642881	0.0066382	0.00300493	0.00269595	0.00701887	0.00717664	0.00587587	0.00368978	0.00590152	0.0051636	0.00101469	0.00181439	0.00279129	0.00231175	0.00214414	0.00120327	-9.33333e-05
531	0.0053562	0.00502124	0.00362928	0.00172249	0.00693116	0.00664663	0.00688291	0.00324859	0.00284218	0.00726827	0.00741829	0.00612605	0.00379206	0.00597962	0.00521908	0.0011359	0.001819	0.00278347	0.00250711	0.00242829	0.0011717	7.95899e-05
530	0.00541594	0.00513352	0.00367796	0.00174177	0.00702465	0.00676426	0.00700382	0.00328252	0.00282519	0.00738528	0.00759361	0.00635001	0.00372963	0.00601332	0.00537337	0.00116232	0.00183583	0.00265904	0.00263546	0.00277296	0.00131542	0.000186283
529	0.00543748	0.00509226	0.00361197	0.0017701	0.00702377	0.00684305	0.00698238	0.00319129	0.00283378	0.007511	0.00763694	0.00640731	0.00374133	0.00612331	0.00546492	0.0011991	0.00184042	0.00260915	0.00250418	0.00261438	0.00123071	0.00012147
528	0.00567099	0.0053325	0.00370055	0.00185725	0.00716597	0.00709707	0.00722891	0.00347922	0.00296024	0.00768203	0.00776415	0.00647591	0.00395837	0.00618459	0.00541945	0.00128253	0.00180065	0.00268634	0.00228478	0.00247069	0.00104802	-5.67033e-05
527	0.00581899	0.00536908	0.00370916	0.00187347	0.00728368	0.00719731	0.00733812	0.00345625	0.00307467	0.00777799	0.00795538	0.00649967	0.00403837	0.00627453	0.00545538	0.00126459	0.00181754	0.00262637	0.00243257	0.00255908	0.00101668	-5.35534e-05
526	0.00592155	0.00549243	0.00385933	0.00188076	0.00745434	0.00726101	0.00743007	0.00345089	0.00303591	0.0078971	0.00799538	0.00663974	0.00403618	0.0064408	0.00556329	0.00134156	0.00195765	0.00271661	0.00241012	0.00253912	0.00108146	-6.03633e-05
525	0.00590781	0.00547972	0.00392523	0.00184336	0.00751294	0.00729959	0.00740302	0.00350947	0.00307774	0.00804274	0.00809051	0.00668392	0.00407625	0.00650836	0.0056225	0.00139331	0.0020143	0.00275259	0.0023053	0.00260895	0.00129461	-0.000162253
524	0.00595008	0.00542114	0.00380753	0.00181681	0.00750196	0.00727665	0.0073222	0.00344374	0.00304775	0.00806563	0.00815167	0.00675022	0.00391638	0.00655605	0.00559746	0.00143861	0.00193901	0.00286037	0.00241156	0.00259953	0.00115816	-5.88633e-05
523	0.00605415	0.00553825	0.00379042	0.00182021	0.00757462	0.00737219	0.00745214	0.00345914	0.00310792	0.00825917	0.00821168	0.00680544	0.00404178	0.00657821	0.00572508	0.00148652	0.0019609	0.00280735	0.00238155	0.00255987	0.00122514	-9.20199e-05
522	0.00615471	0.00562276	0.00383455	0.00185973	0.00774479	0.00751166	0.00761166	0.0035483	0.00308281	0.00825559	0.00833604	0.00684305	0.00413414	0.0066625	0.00578125	0.00149878	0.00199478	0.00273471	0.00258203	0.00271192	0.00125076	-0.000119443
521	0.00625587	0.00573615	0.00400412	0.00187529	0.00789172	0.00764575	0.00755807	0.00361151	0.0031528	0.00828001	0.0083827	0.00694765	0.00414616	0.00673667	0.00576589	0.0014968	0.00200347	0.0027875	0.0025684	0.00270071	0.00118818	2.13273e-07
520	0.00625981	0.0056878	0.00393996	0.00187923	0.00783709	0.00767781	0.00764668	0.00363025	0.00310095	0.00823262	0.00852216	0.0068579	0.00417206	0.00685535	0.00575528	0.00154254	0.00193231	0.00274032	0.00255415	0.00267486	0.000899213	-7.34967e-05
519	0.00631777	0.00578123	0.00377331	0.00185157	0.00784131	0.00773978	0.00777074	0.00359617	0.00323631	0.00829655	0.00854428	0.00684907	0.00407938	0.00686074	0.00592217	0.00145529	0.00185725	0.00269848	0.00255816	0.0026504	0.00100658	-0.000172707
518	0.00623169	0.00568454	0.00370176	0.00176327	0.00774936	0.00764871	0.00767913	0.00352357	0.00308784	0.00834839	0.00833855	0.00685848	0.00395813	0.00685697	0.00593466	0.00138734	0.00200107	0.00270715	0.00274125	0.00285137	0.00138674	-6.676e-05
517	0.00638333	0.0056698	0.00378596	0.00183912	0.00777686	0.00767478	0.00771063	0.00364345	0.00307376	0.00836486	0.00843833	0.00698731	0.00415651	0.00682924	0.0060468	0.00139829	0.00202146	0.00275051	0.00284374	0.00290805	0.00144063	6.94933e-05
516	0.0065613	0.00587316	0.00392263	0.00188681	0.00793908	0.00777427	0.00780066	0.00361647	0.00303845	0.00846146	0.00869126	0.00694882	0.00425493	0.00698424	0.00588604	0.00147734	0.00191657	0.00265669	0.00290861	0.00295375	0.00142953	4.27667e-05
515	0.00670933	0.00603638	0.00407562	0.00194154	0.00811193	0.00785655	0.00790721	0.00361747	0.00312871	0.00869313	0.00883573	0.00702518	0.00424426	0.00708226	0.00599363	0.00156214	0.00201627	0.00267388	0.00280017	0.00299762	0.0012592	-7.12167e-05
514	0.00669567	0.00590198	0.00399781	0.00187798	0.00814149	0.00783402	0.00790943	0.00353262	0.00305703	0.008611	0.00869417	0.00714873	0.00421565	0.00706388	0.00604535	0.00156196	0.00205663	0.00272013	0.00286263	0.00294368	0.00121393	5.15134e-05
513	0.00663264	0.00583015	0.00399191	0.00189887	0.00810577	0.00793171	0.00797713	0.00360548	0.00298519	0.00874128	0.00869671	0.00721634	0.00417653	0.00701761	0.00598697	0.00168724	0.00205316	0.00275602	0.00291694	0.00300554	0.00134593	0.000235603
512	0.0067425	0.00586371	0.00403319	0.00195187	0.00823356	0.00811459	0.00807311	0.00371714	0.0031354	0.00878513	0.00879871	0.00726608	0.0042516	0.0070434	0.0060475	0.00161816	0.00207997	0.00285333	0.00297758	0.00308394	0.00138171	0.000350613
511	0.00678524	0.0059473	0.00403796	0.00191869	0.00824302	0.00808075	0.00796598	0.00364656	0.00318491	0.00886571	0.0088369	0.00723737	0.00432959	0.00717376	0.00609235	0.0015458	0.00209997	0.00273985	0.00296022	0.00295563	0.00143493	0.000369187
510	0.00683601	0.00605719	0.00409674	0.0018035	0.00828519	0.00818863	0.00811013	0.00367327	0.00305299	0.00886038	0.00894837	0.00727069	0.00428322	0.00723262	0.00636079	0.00170813	0.00203213	0.00279728	0.00305672	0.00310706	0.0016538	0.000296783
509	0.00692702	0.00606815	0.0040484	0.00194955	0.00831295	0.00807319	0.0081231	0.00369819	0.00308123	0.00883615	0.00884252	0.00727068	0.00429263	0.00732459	0.00645383	0.00173678	0.0021441	0.00279493	0.00291967	0.0029842	0.00150884	0.000307023
508	0.00681728	0.00604992	0.00399919	0.00193098	0.00847102	0.00807744	0.00806141	0.00381467	0.00314827	0.00896801	0.00886539	0.00719624	0.0044269	0.00734817	0.00640222	0.001774	0.00212062	0.0029113	0.00290783	0.0030724	0.00143942	0.000145837
507	0.00677604	0.00606322	0.00406944	0.00186862	0.00842333	0.00811742	0.00798863	0.00376096	0.00313774	0.00884791	0.00895233	0.00723119	0.00430663	0.00720698	0.00628373	0.0017291	0.00217378	0.00284435	0.00273695	0.00296736	0.00117242	3.04066e-05
506	0.00694583	0.00619239	0.00419579	0.00199369	0.00851537	0.00825642	0.00817121	0.00384122	0.00326476	0.00880144	0.00904784	0.00729215	0.0043058	0.00720211	0.00619998	0.00177177	0.00226592	0.00277362	0.00267628	0.00297889	0.00126484	4.61301e-05
505	0.00690121	0.00618004	0.00402602	0.00187656	0.00844897	0.00814557	0.00808972	0.0038724	0.00315605	0.00878277	0.0089788	0.00714709	0.00431213	0.00726651	0.0062593	0.00188397	0.00213848	0.00290687	0.00293761	0.00310115	0.00146181	0.000191253
504	0.00701418	0.00616905	0.00392621	0.00185555	0.00837714	0.00813666	0.00806901	0.00383279	0.00314045	0.00892819	0.00891758	0.00712313	0.0043032	0.00716752	0.00633911	0.00186043	0.00210599	0.00289765	0.00290171	0.00305901	0.00135124	4.433e-05
503	0.00699054	0.00615254	0.00405129	0.00190146	0.00843915	0.00814927	0.00805369	0.00383498	0.00306594	0.00884694	0.00890352	0.00727186	0.00427384	0.00708485	0.00623338	0.00183422	0.00215487	0.00283318	0.00285204	0.00292492	0.00130232	-0.000116037
502	0.00711844	0.00629786	0.00417071	0.00209969	0.00862351	0.00821115	0.00814511	0.00394732	0.00319499	0.00894359	0.00907043	0.00740102	0.00441748	0.00722897	0.00631978	0.00171513	0.00205057	0.00286478	0.00294802	0.00287562	0.00131437	-0.000154673
501	0.00714675	0.00623094	0.00405271	0.00210005	0.0086401	0.00823853	0.00807453	0.00388297	0.0033001	0.00889408	0.00909312	0.00729314	0.00435014	0.0072228	0.00638705	0.00168541	0.00204592	0.00291098	0.00294608	0.00294182	0.00141313	-0.000152945
500	0.0070803	0.00606891	0.00398882	0.00185866	0.00841656	0.00803838	0.00801025	0.00367858	0.00315648	0.00878402	0.00889808	0.00725356	0.00417166	0.00732503	0.00636008	0.00170028	0.00201397	0.00291111	0.00278623	0.00269414	0.00119051	-0.000413713
499	0.00708656	0.00619827	0.00408373	0.00182753	0.00848757	0.00808847	0.00808168	0.00367733	0.0031924	0.00879376	0.00893916	0.00729298	0.004235	0.00726075	0.00627574	0.00170822	0.00198571	0.00287361	0.00285277	0.00283665	0.00129986	-0.000256847
498	0.00719266	0.00626537	0.00408247	0.00199018	0.00843796	0.00809164	0.00798429	0.00374054	0.00330891	0.00880853	0.00903546	0.00730842	0.00427459	0.00719944	0.00620137	0.00171608	0.00204542	0.00287069	0.00295523	0.00298319	0.00141675	-3.35967e-05
497	0.00711561	0.00610647	0.00409565	0.00195593	0.00836385	0.0080302	0.00792359	0.0036665	0.00315547	0.00879388	0.00891788	0.00714225	0.00421211	0.0072735	0.00634264	0.00173796	0.00203495	0.00279922	0.00289595	0.00293163	0.00139933	0.00010206
496	0.00716659	0.00623146	0.00416893	0.00197985	0.00854552	0.00810853	0.00812595	0.0038981	0.00326859	0.00883829	0.00895617	0.00727431	0.00428608	0.00725283	0.00625044	0.0016538	0.00192566	0.00281612	0.00303193	0.00305504	0.00156245	0.0002121
495	0.0073996	0.00636589	0.00426866	0.0021995	0.00857403	0.00819226	0.00833041	0.00403845	0.00340177	0.00888224	0.00903332	0.00743143	0.00438299	0.00720119	0.00621627	0.00170736	0.00203853	0.00290037	0.00300419	0.00301445	0.00159233	0.000111483
494	0.00728669	0.0061009	0.00414978	0.00211199	0.00846017	0.00819336	0.00812144	0.00397227	0.0032302	0.00879166	0.00897103	0.00731363	0.00426337	0.00716661	0.00615016	0.00161522	0.00209641	0.00296214	0.00290172	0.00286677	0.00137244	1.942e-05
493	0.00716322	0.00600836	0.00404273	0.00206312	0.00840882	0.00813526	0.00795386	0.00390719	0.0030605	0.00874175	0.0088504	0.00716926	0.00431493	0.007001	0.00614086	0.00158736	0.00206562	0.00292197	0.0027844	0.00297742	0.00132807	0.00019753
492	0.00721759	0.00618073	0.00411325	0.00207884	0.00842568	0.00807254	0.00809843	0.00382301	0.00327159	0.00876688	0.00890382	0.00724935	0.00439398	0.00703025	0.0061226	0.00167546	0.00204633	0.00287825	0.00302197	0.00311738	0.00144952	0.000252693
491	0.00714376	0.00608609	0.00413406	0.00211571	0.00847726	0.00810875	0.00805991	0.00378446	0.0033655	0.00875367	0.00885915	0.00720128	0.00438784	0.00692865	0.00607717	0.00170512	0.00197018	0.00277518	0.00273056	0.00276793	0.00124581	-1.11867e-05
490	0.00713746	0.00601024	0.00414572	0.00207284	0.00833463	0.00796491	0.00802232	0.0037882	0.00327565	0.00861478	0.00879558	0.0071751	0.00431681	0.00692317	0.00593155	0.00157143	0.00185854	0.00275022	0.00267595	0.00280003	0.00135039	0.000152113
489	0.00712218	0.00594495	0.00407047	0.00204326	0.00815866	0.00787576	0.00786197	0.00363753	0.00315678	0.00845702	0.00875095	0.00711236	0.00417599	0.00707601	0.00594153	0.00142575	0.00191242	0.00293311	0.00261952	0.00268134	0.00145194	0.000173733
488	0.00712934	0.00607782	0.00413002	0.00208151	0.00829379	0.00782418	0.00789904	0.00369122	0.00320455	0.00855063	0.00874476	0.00711501	0.00425543	0.00698579	0.0060309	0.00146598	0.00193427	0.00281563	0.00263214	0.00282626	0.00138595	9.77267e-05
487	0.00712455	0.0060715	0.0040951	0.00206375	0.00826044	0.00780082	0.00787419	0.00371322	0.00326866	0.00849923	0.00871284	0.00700321	0.00432302	0.00688255	0.0059664	0.00142267	0.00194433	0.00275992	0.00261216	0.0026805	0.00128642	9.727e-05
486	0.00714608	0.00612346	0.00410898	0.00196001	0.00823916	0.00784305	0.00777447	0.00374245	0.00334689	0.00846101	0.00848533	0.00701634	0.00419597	0.00675999	0.00585236	0.00144765	0.00190727	0.00291999	0.00277116	0.00275457	0.00137312	6.69567e-05
485	0.00711174	0.00606825	0.00414849	0.0019491	0.00817012	0.00774798	0.00776056	0.00362466	0.00332685	0.00821356	0.00843479	0.00703803	0.0042013	0.00673969	0.00586818	0.00153548	0.0018827	0.00293953	0.00272259	0.00295632	0.00153048	3.96766e-05
484	0.00697495	0.00603497	0.00405986	0.00185624	0.00801637	0.0074835	0.00771093	0.0034954	0.00309719	0.00814507	0.00834524	0.00679662	0.00410801	0.00675057	0.00570138	0.00143968	0.0019782	0.0029347	0.00268005	0.00277676	0.00149777	0.000261577
483	0.00699101	0.00593598	0.00410743	0.00186864	0.00793567	0.00744689	0.00769895	0.00355224	0.00317082	0.00825308	0.00833687	0.00677509	0.0040671	0.00679487	0.00581492	0.00143241	0.00202847	0.00294954	0.00262956	0.00260218	0.00125306	9.40034e-05
482	0.00713368	0.00600809	0.00419318	0.0020533	0.00811031	0.00763536	0.00766571	0.0036486	0.00321339	0.00827155	0.00854004	0.0068333	0.00419576	0.00674744	0.00573451	0.00146393	0.00195173	0.00300434	0.00252055	0.00267189	0.0012176	-7.70567e-05
481	0.00712365	0.00603523	0.00420815	0.00216812	0.00824488	0.00770806	0.00770311	0.00377139	0.00327179	0.00833386	0.0085404	0.00684415	0.00429522	0.0066031	0.00550472	0.00127988	0.00202101	0.00294914	0.0026787	0.00282963	0.001379	-7.99665e-06
480	0.00693833	0.00586108	0.00404683	0.00204776	0.00794901	0.00739223	0.00750572	0.00359746	0.00318737	0.00810192	0.00827058	0.00669455	0.00414965	0.00645897	0.00547596	0.00137458	0.00196173	0.00296698	0.00266567	0.00283533	0.00132897	2.30867e-05
479	0.00701529	0.00595289	0.00399668	0.00213311	0.00792607	0.00741108	0.00747285	0.00362783	0.00320574	0.00807386	0.00818953	0.00667515	0.00407857	0.00645226	0.00556688	0.00132689	0.00191534	0.00293809	0.0026238	0.00263059	0.00121095	-9.242e-05
478	0.0069727	0.00591838	0.00404467	0.00215265	0.00786274	0.0074853	0.00746111	0.00364973	0.00329375	0.00802628	0.0081305	0.00657987	0.00409276	0.00645152	0.00547042	0.00125127	0.00180843	0.00287456	0.00275781	0.00259691	0.00141487	2.758e-05
477	0.00680957	0.00574633	0.00396989	0.0020494	0.00769957	0.00726322	0.00729102	0.00357528	0.0031464	0.00782309	0.0079576	0.00642033	0.0040067	0.00639013	0.00529918	0.00130768	0.00190259	0.00286648	0.00267292	0.00266027	0.0013786	0.000177653
476	0.00683605	0.00575419	0.0040204	0.00209981	0.00757089	0.00722396	0.00730407	0.00363223	0.0032431	0.00781351	0.00783984	0.00657407	0.00405514	0.00633389	0.00539439	0.00139761	0.00197074	0.00290428	0.00251717	0.00260374	0.00132827	0.000127407
475	0.00695553	0.00580226	0.00404637	0.00206636	0.0075918	0.00723604	0.00747445	0.00359562	0.00321701	0.00762494	0.00783461	0.00649323	0.00418902	0.00622956	0.00533147	0.00134642	0.00175188	0.00291184	0.00244434	0.00261519	0.00117046	6.43833e-05
474	0.00704309	0.00579577	0.00420146	0.00218227	0.00769561	0.00730931	0.00741969	0.0036562	0.00324761	0.00773398	0.00787932	0.00641087	0.00419356	0.00615566	0.00520834	0.00127316	0.00186626	0.00298346	0.002604	0.00255664	0.0013497	0.000139007
473	0.00697565	0.00581786	0.00418496	0.00218575	0.00763156	0.00711034	0.00726416	0.00370395	0.0032783	0.00777474	0.00781784	0.00641034	0.00409843	0.00618592	0.00513557	0.00126053	0.00189865	0.00302977	0.00260327	0.00270123	0.00147286	0.000320243
472	0.00687883	0.00574464	0.00415192	0.00215819	0.00741898	0.00694261	0.00721432	0.00354416	0.00324068	0.00756325	0.00775791	0.00624886	0.00399431	0.00612247	0.00518334	0.00109638	0.00183653	0.00299504	0.00257189	0.00271634	0.00152598	0.0004993
471	0.00670858	0.00560401	0.00401967	0.0021955	0.00724451	0.00691203	0.007104	0.00341866	0.00308014	0.0073538	0.00753136	0.00610607	0.00396423	0.0061117	0.00508875	0.00107999	0.00188379	0.00297118	0.00241359	0.00260859	0.00156009	0.000253127
470	0.00674818	0.00552619	0.00406274	0.00220599	0.00732129	0.00689712	0.00698822	0.0033804	0.00309689	0.00737263	0.00745562	0.00608669	0.00396613	0.00599514	0.00504568	0.00107063	0.00194916	0.00298413	0.00199652	0.00222127	0.00117204	-6.45834e-05
469	0.00667948	0.00547849	0.00408116	0.00212481	0.00719088	0.00671745	0.00691948	0.0033866	0.00302031	0.00729914	0.00734246	0.00601557	0.00395997	0.00587018	0.00495111	0.00097593	0.00188545	0.00306353	0.00207694	0.00223012	0.00113048	0.000116297
468	0.00673177	0.00555169	0.00410179	0.00221078	0.00717269	0.00680425	0.00696319	0.00352791	0.00314514	0.00721583	0.00736421	0.00607206	0.00403455	0.00572237	0.00487916	0.000969638	0.00168166	0.00306012	0.00224384	0.00211574	0.00117426	-4.48634e-05
467	0.00671935	0.00551989	0.00405384	0.00222689	0.00721693	0.00674598	0.00707793	0.00358554	0.00328188	0.00725566	0.00735376	0.00611436	0.00409765	0.00572348	0.00481729	0.00094469	0.0017425	0.00299204	0.00233731	0.00213247	0.00107071	0.00010968
466	0.0065931	0.00550631	0.0040162	0.0022814	0.00709173	0.00657189	0.00696977	0.00353563	0.00328498	0.00719094	0.00722634	0.00592935	0.00404786	0.00573386	0.00482119	0.000889771	0.00183015	0.00302367	0.00219789	0.00210488	0.000813823	2.71325e-06
465	0.00656698	0.00556127	0.00402359	0.00227809	0.00696925	0.00654795	0.0068541	0.00346439	0.00331733	0.00708987	0.00723094	0.00590212	0.0040932	0.00548623	0.00464079	0.00068622	0.00177552	0.00295163	0.00198535	0.00209369	0.00080078	-4.83866e-05
464	0.00653829	0.00538737	0.00395791	0.00215204	0.00674612	0.00645415	0.00668005	0.00344592	0.00327076	0.00691649	0.00709992	0.0058056	0.00401796	0.00537638	0.00447515	0.000664249	0.00173076	0.00288849	0.00183067	0.00208748	0.000839287	-1.03133e-05
463	0.00650945	0.00541319	0.0039775	0.0021618	0.00679964	0.00631714	0.00670773	0.00344604	0.00330798	0.00689624	0.00705106	0.00567153	0.00395344	0.00536247	0.00444421	0.00073839	0.00165194	0.00299485	0.0020436	0.00232711	0.00111714	9.86167e-05
462	0.00634011	0.00526203	0.00397639	0.00199951	0.00659971	0.00611335	0.00654766	0.00329114	0.00311489	0.00681989	0.00683512	0.0055761	0.00378585	0.00533205	0.00453188	0.000851209	0.00168639	0.00303425	0.00208086	0.00222949	0.00108091	0.000126513
461	0.00632013	0.00530015	0.00399874	0.00213382	0.0065376	0.00615968	0.00648339	0.00337613	0.00329543	0.00676414	0.00685858	0.00560839	0.00387254	0.00523654	0.00441966	0.000660211	0.00172177	0.00293684	0.00196532	0.00204202	0.000992987	1.08534e-05
460	0.006367	0.00535237	0.00398832	0.00228633	0.00663887	0.00614462	0.0064514	0.00346433	0.00335576	0.00678903	0.00684323	0.00565147	0.00401937	0.00523546	0.00436849	0.000786843	0.00168354	0.00299043	0.00195732	0.00199396	0.00110146	0.000165913
459	0.00623898	0.0051964	0.0038825	0.00226556	0.00641101	0.00596158	0.00632194	0.003296	0.00319668	0.00658829	0.00660911	0.00556238	0.00388808	0.00518437	0.0043411	0.000778431	0.00179815	0.00299972	0.0019924	0.00186472	0.00101999	0.000223587
458	0.00637381	0.00523725	0.004193	0.00242635	0.00647854	0.00611815	0.00646092	0.00349336	0.00334792	0.00652893	0.00665208	0.0055858	0.00402252	0.00513818	0.00423469	0.000698049	0.00170629	0.00306258	0.00200321	0.00200285	0.00100983	0.000178703
457	0.00643625	0.00531901	0.00420363	0.00256915	0.00662654	0.00606227	0.00649846	0.00356382	0.00341648	0.00654792	0.00667661	0.00565702	0.00406805	0.00510182	0.00424532	0.000724245	0.00157972	0.0030925	0.00186248	0.00217576	0.00102968	0.000329987
456	0.00625557	0.00517195	0.0040071	0.00231868	0.00645275	0.00583097	0.00637529	0.003355	0.00326106	0.00642966	0.0065395	0.00550088	0.00399811	0.00509587	0.00409481	0.000647996	0.00161201	0.0031556	0.00179228	0.0021535	0.000995323	0.000279163
455	0.00622962	0.00525984	0.00405934	0.00242756	0.00637814	0.0059399	0.0063214	0.00345192	0.00338332	0.00647989	0.00658928	0.00544228	0.00405378	0.00491193	0.0040158	0.000657905	0.0015998	0.00318805	0.00179418	0.00209793	0.00099039	0.000192163
454	0.00620445	0.00523576	0.00414024	0.00259677	0.00645973	0.0058969	0.00623593	0.00350761	0.00345489	0.00643726	0.00664982	0.00555834	0.00399159	0.00499561	0.00402785	0.000530897	0.00179594	0.00313893	0.00165723	0.00211937	0.000898127	0.00020945
453	0.0062598	0.00530371	0.00428584	0.00263853	0.00645021	0.00596908	0.00642217	0.00362268	0.00357455	0.00641612	0.00664412	0.00546725	0.00407291	0.00495243	0.00400224	0.000461209	0.00180645	0.00325564	0.00170453	0.00184197	0.00088265	6.93766e-05
452	0.00626078	0.00533062	0.00422128	0.00249271	0.00632085	0.00581509	0.00649808	0.003562	0.00352797	0.00627066	0.00642206	0.00527898	0.00398254	0.004758	0.00385341	0.000480514	0.00167784	0.0032386	0.0015985	0.00183854	0.000964867	0.000188517
451	0.0062326	0.00536774	0.00419009	0.00254304	0.00629107	0.00584049	0.00647854	0.00358168	0.00359156	0.006292	0.00636454	0.00534362	0.00409355	0.00474337	0.00375941	0.000470692	0.00166315	0.00313319	0.0015615	0.00199967	0.00107036	0.000316163
450	0.00601143	0.00511491	0.00419801	0.00253736	0.00609575	0.00550433	0.0061818	0.00338527	0.00341185	0.00601947	0.00604053	0.00516617	0.00393004	0.00457333	0.00373639	0.000469524	0.00178446	0.00318453	0.00168211	0.00199995	0.0011076	0.000380863
449	0.00616638	0.0052315	0.00428404	0.00266084	0.00612195	0.00553907	0.0062286	0.00341824	0.00354416	0.00600181	0.00612258	0.00520713	0.00396239	0.00460513	0.00359663	0.000405439	0.001871	0.00321543	0.00168227	0.0018502	0.0010894	0.000390843
448	0.00604532	0.00507537	0.00420777	0.00255454	0.00600397	0.00548017	0.00600704	0.00343166	0.00356247	0.0058869	0.00602586	0.00505193	0.00397824	0.00447849	0.00352824	0.000238594	0.00183142	0.00319742	0.00168825	0.00180293	0.00106367	0.000351823
447	0.00587336	0.00490039	0.00414683	0.00245547	0.00583811	0.00529547	0.00588577	0.00345422	0.00339951	0.00576318	0.00592432	0.0049682	0.00384971	0.00436927	0.00359214	0.000397323	0.00173405	0.00324905	0.00145192	0.00166919	0.000829467	0.00019662
446	0.00581788	0.00493951	0.00403509	0.00244286	0.00572942	0.00522184	0.0059677	0.00339001	0.00338353	0.00571323	0.00571972	0.00484909	0.00376992	0.00430653	0.00340928	0.000337101	0.0017255	0.00329087	0.00144022	0.00161425	0.000991223	0.000211133
445	0.00585645	0.00510342	0.00423864	0.00264758	0.00584946	0.00542509	0.00603367	0.003579	0.00354662	0.00580683	0.00574365	0.00497764	0.00391473	0.00414946	0.00334047	0.000239353	0.00160981	0.00341507	0.00142151	0.0017271	0.00104098	0.000230003
444	0.0056585	0.00497465	0.00415818	0.00261089	0.00568295	0.00521737	0.00581069	0.0035147	0.00351126	0.00564908	0.00565617	0.004728	0.0037861	0.00423769	0.00348145	0.000328208	0.00173148	0.0034467	0.00138009	0.00174589	0.00101688	0.000423713
443	0.00563057	0.004937	0.00419934	0.00260135	0.00548774	0.00508369	0.00581642	0.00349877	0.00350246	0.00549926	0.00569745	0.00470415	0.00381014	0.00437449	0.00345183	0.000309483	0.00181847	0.00354297	0.00136758	0.00186498	0.00119834	0.00054694
442	0.00580188	0.0050803	0.00428224	0.00280631	0.00556327	0.00506601	0.00585415	0.00348373	0.00363981	0.00562591	0.00572637	0.00480664	0.00380283	0.00435028	0.0032481	0.000266699	0.00190821	0.00350913	0.00139638	0.001806	0.0010608	0.00035889
441	0.00576973	0.00496006	0.00428825	0.00273263	0.00551522	0.00495117	0.00575395	0.00341594	0.00371429	0.00549544	0.00556588	0.0047181	0.00384652	0.00428251	0.00315087	0.0002908	0.00191916	0.00346556	0.00133526	0.00153707	0.000839877	0.000265693
440	0.00572148	0.00505623	0.00444431	0.00295961	0.00548732	0.00501376	0.00588674	0.00359528	0.00386932	0.00543626	0.00567612	0.00484341	0.00403242	0.00423853	0.0032234	0.000350489	0.00182243	0.00358773	0.00140204	0.00150038	0.000891337	0.000319453
439	0.00568608	0.00511897	0.00445862	0.00297041	0.00540429	0.00496563	0.00595221	0.00373514	0.00383625	0.00537673	0.00549445	0.00475901	0.00419237	0.00405116	0.00317663	0.000203324	0.00178669	0.0036089	0.00140907	0.001512	0.00104103	0.000529533
438	0.0055092	0.00502431	0.004449	0.00297928	0.00537542	0.00481698	0.00576757	0.00375231	0.00377202	0.00523388	0.00539221	0.00467229	0.0040756	0.00390648	0.00314236	0.000179612	0.00187887	0.00372427	0.00134267	0.00153269	0.000952697	0.000543953
437	0.00548176	0.00503411	0.0045904	0.00331288	0.00540475	0.00503106	0.00597049	0.00387715	0.00396637	0.00532555	0.00555378	0.00476748	0.0041163	0.003962	0.00308295	0.000279908	0.00189517	0.00373928	0.00136864	0.00155813	0.000911843	0.000574353
436	0.00565215	0.00522479	0.00477115	0.00351557	0.00545424	0.00504845	0.00595032	0.0039966	0.00408065	0.00543719	0.00558988	0.00477857	0.0043232	0.00388131	0.0030188	0.000318899	0.00196581	0.00369415	0.00145815	0.00174258	0.00108554	0.000778447
435	0.00571257	0.00536762	0.00495816	0.00346659	0.00546087	0.0050332	0.00597827	0.00409439	0.00420427	0.00546693	0.00563023	0.00483893	0.00446803	0.00383297	0.00303614	0.000384215	0.00210676	0.00375696	0.00130172	0.00174157	0.0010324	0.000809527
434	0.0058414	0.00534281	0.00512752	0.00359883	0.00560502	0.00506505	0.00612953	0.00433531	0.00441778	0.00545062	0.00572752	0.00495941	0.00458315	0.00383068	0.00295955	0.00037768	0.0020888	0.00382829	0.00141893	0.00171478	0.00111348	0.000806897
433	0.00567949	0.0051727	0.0050643	0.00363757	0.005411	0.00487406	0.00587157	0.0043079	0.0042736	0.00504738	0.005505	0.00474905	0.00453473	0.00375355	0.00294603	0.000370195	0.00201113	0.0039653	0.00145813	0.00169211	0.00105285	0.000692243
432	0.0055891	0.00513478	0.00505292	0.00366216	0.00521788	0.00483983	0.0058805	0.00425044	0.00424365	0.00500742	0.00531202	0.00473666	0.00462073	0.00369387	0.0030575	0.00031546	0.00212774	0.00415474	0.00138951	0.00183684	0.00120178	0.000717803
431	0.0055626	0.00529743	0.00516274	0.00392651	0.00517698	0.00472951	0.00601365	0.00424167	0.00455906	0.0050996	0.00531181	0.00488109	0.00477144	0.0036832	0.00296761	0.000357449	0.00229567	0.00409385	0.00127026	0.00174127	0.00131295	0.00072568
430	0.00573122	0.00543971	0.00542466	0.00413733	0.0051746	0.00486812	0.00605746	0.00439087	0.00470456	0.00523336	0.00535744	0.00490092	0.00478464	0.00365633	0.00289504	0.000380737	0.00227255	0.00423151	0.00137959	0.00155691	0.00122179	0.00103971
429	0.0056662	0.00540395	0.00543961	0.00412212	0.0051081	0.00483899	0.00592052	0.00453591	0.00476316	0.00519852	0.0052928	0.00478922	0.00480561	0.00354114	0.00294605	0.000425439	0.00222188	0.00432851	0.00127696	0.00160987	0.00129911	0.00104866
428	0.0054958	0.00532786	0.0054617	0.00424874	0.00495444	0.00464851	0.0058749	0.00451483	0.00469694	0.00502841	0.00522006	0.00477142	0.00489002	0.00353016	0.002867	0.000440174	0.00228629	0.00441969	0.00133089	0.00176832	0.00138823	0.00107537
427	0.00535014	0.00534645	0.00565891	0.00434619	0.00481648	0.00455304	0.0059556	0.00456454	0.00495442	0.00501265	0.00513055	0.00471606	0.00504535	0.00353977	0.0027448	0.000319249	0.00245282	0.00464624	0.00138145	0.00169916	0.00137607	0.00120198
426	0.00550858	0.0056035	0.00588308	0.00471104	0.00509943	0.00482102	0.00614141	0.00490815	0.0052677	0.00515162	0.00528631	0.0050294	0.00528886	0.00354584	0.00276131	0.000404658	0.00254178	0.00460064	0.00110366	0.00160767	0.00119558	0.00116975
425	0.00563837	0.00566682	0.00600112	0.00485519	0.00503627	0.00480587	0.00612838	0.00501985	0.00541666	0.005039	0.00526851	0.00502775	0.00533637	0.00354878	0.00264587	0.000575359	0.00256163	0.00472401	0.00107534	0.00173935	0.00125932	0.00118295
424	0.00564904	0.00574175	0.00617921	0.00504274	0.00503934	0.00489328	0.00624209	0.00524046	0.00562118	0.00509042	0.00533123	0.00508505	0.00547808	0.00352007	0.00272176	0.000580891	0.00258462	0.00500925	0.00123247	0.00182918	0.00143992	0.00122087
423	0.0056447	0.00579084	0.00627608	0.00531248	0.00505666	0.00485121	0.00624502	0.00540985	0.00571744	0.0051043	0.00529987	0.0052224	0.00558586	0.00350254	0.0026297	0.0006681	0.00268185	0.00526768	0.0011962	0.00199743	0.0016343	0.00141691
422	0.00562011	0.00577644	0.0063944	0.00535503	0.00502645	0.00473927	0.00623199	0.00536324	0.00578454	0.00488926	0.00516971	0.00510119	0.00560124	0.00337778	0.00261376	0.000693248	0.00292042	0.00531203	0.00129482	0.00180875	0.00155008	0.00145021
421	0.00574904	0.00585215	0.00655404	0.00558633	0.00513763	0.00473196	0.00629885	0.00554155	0.00605095	0.00502835	0.00516262	0.00529189	0.00578464	0.00334001	0.00263522	0.000649813	0.00289981	0.00527426	0.00147985	0.00176745	0.00149963	0.00159409
420	0.00556101	0.00595607	0.00680316	0.00572269	0.00503118	0.00466257	0.00631734	0.0056511	0.00614295	0.00505179	0.00527247	0.00533044	0.00586732	0.00343834	0.00269414	0.000674382	0.00298651	0.005453	0.00120812	0.0016279	0.00160927	0.00169748
419	0.00537696	0.00587925	0.00694593	0.00571706	0.00496228	0.0045861	0.00628026	0.00570633	0.00616732	0.00493963	0.00510875	0.00513781	0.00592481	0.00349374	0.00272442	0.00072119	0.00309901	0.00570273	0.00115883	0.0015668	0.00151473	0.00165645
418	0.00536249	0.00588896	0.0070381	0.00600037	0.00488677	0.0046905	0.00632782	0.00576025	0.0063868	0.00483072	0.00506723	0.00516146	0.0061262	0.00340917	0.00263642	0.000825335	0.00316181	0.00580003	0.00122285	0.00164687	0.00175419	0.00174488
417	0.0054348	0.00591656	0.00708183	0.00620516	0.00493371	0.00483485	0.00626882	0.00583089	0.00667406	0.00483068	0.00505587	0.00520626	0.00629461	0.00338105	0.00267122	0.000866631	0.0033255	0.0058804	0.00121849	0.00183751	0.00180831	0.00184648
416	0.00565311	0.00609882	0.00719092	0.00635577	0.00492896	0.00494458	0.00632019	0.0060385	0.00687101	0.00494371	0.00522123	0.00541159	0.0065317	0.00321536	0.00257866	0.000960282	0.00340446	0.00601671	0.00123631	0.00191918	0.00177624	0.00197541
415	0.0056495	0.00633439	0.00743451	0.00661809	0.0049093	0.00499059	0.00657192	0.00635183	0.00706217	0.00499788	0.00533756	0.005523	0.00676551	0.00326262	0.00252032	0.000911614	0.00353925	0.00621033	0.00120821	0.00195706	0.00194647	0.00218437
414	0.00555523	0.00645009	0.00766426	0.00681059	0.00489895	0.00497846	0.00670603	0.00655542	0.00718702	0.00493649	0.00532191	0.00551651	0.0068054	0.00330343	0.00254739	0.00103222	0.00359174	0.006358	0.00127315	0.00199159	0.0021045	0.0022655
413	0.00556658	0.00650632	0.00762701	0.00703449	0.00487026	0.00500493	0.00664994	0.00663089	0.00725287	0.00503286	0.00530888	0.00556699	0.00683904	0.00331097	0.00259397	0.00124272	0.00358358	0.00643603	0.00125409	0.00199264	0.0022734	0.00226125
412	0.00565118	0.00652804	0.00780125	0.0072678	0.00488826	0.00503603	0.00672729	0.0068721	0.0074152	0.00501786	0.00528793	0.00552403	0.00714105	0.00325001	0.00263797	0.00128249	0.00362941	0.00657258	0.00122207	0.00190564	0.00210598	0.002258
411	0.00573219	0.00661917	0.00801623	0.00735624	0.00494207	0.00494179	0.00680669	0.0069346	0.00754252	0.00497355	0.00545663	0.00547035	0.00718514	0.00333769	0.00265571	0.00129067	0.00385088	0.00671559	0.00119857	0.00200919	0.00220431	0.00240281
410	0.00570742	0.00674735	0.00813203	0.00760673	0.00485661	0.00492736	0.00696767	0.00706557	0.0077927	0.00489742	0.005411	0.00580442	0.00751274	0.0032177	0.00264316	0.00139726	0.00392058	0.00698077	0.00131843	0.00200907	0.00211189	0.00259866
409	0.00576712	0.00680718	0.00822528	0.00784475	0.00494553	0.00504296	0.00701855	0.00732078	0.00808606	0.00502884	0.00536225	0.00578945	0.00773333	0.0032238	0.00268113	0.00150351	0.00402309	0.00700512	0.00131762	0.00198232	0.00230868	0.00264494
408	0.00580885	0.00700441	0.00855641	0.00797055	0.0049679	0.00516732	0.00711438	0.0074225	0.00829248	0.00509111	0.00538954	0.00587336	0.0078811	0.00315337	0.00255612	0.00165517	0.00411949	0.00698317	0.00127709	0.00197371	0.00232143	0.00269883
407	0.0058259	0.00715605	0.0087192	0.0081404	0.00503231	0.00510839	0.00724986	0.0075035	0.00835221	0.00507464	0.00539246	0.00599953	0.00797176	0.00315697	0.00249097	0.00164109	0.00418277	0.00723909	0.00139357	0.00228896	0.00243625	0.00289144
406	0.00585	0.00705811	0.00882863	0.00830509	0.00489305	0.00514273	0.00717631	0.00759869	0.00841935	0.00506155	0.00534972	0.00608447	0.00794121	0.00320918	0.00256115	0.00173406	0.00433015	0.00744729	0.00131584	0.00222943	0.00260014	0.00293953
405	0.00575084	0.00707476	0.00893182	0.00852113	0.00484331	0.00517116	0.00718072	0.00764831	0.00857221	0.00503171	0.00537399	0.00594804	0.00813832	0.00329578	0.00256751	0.00181671	0.00450615	0.00763477	0.00121136	0.00210133	0.00251231	0.00302349
404	0.00564706	0.00711384	0.00903063	0.00865697	0.0048122	0.00504037	0.00719644	0.00777888	0.00879101	0.0050255	0.0054287	0.00592188	0.00836936	0.00322113	0.00261309	0.00191897	0.00449392	0.0078271	0.00127674	0.00194134	0.00253578	0.00329306
403	0.00580662	0.0073422	0.00929111	0.00895031	0.00491538	0.00509753	0.00737574	0.00811342	0.00913717	0.00509169	0.00554226	0.00612983	0.00850136	0.00322787	0.00253006	0.00186114	0.00450865	0.00800118	0.00120103	0.00216958	0.00263742	0.00329438
402	0.00589466	0.00732733	0.00938373	0.00911474	0.00491328	0.00499606	0.00729256	0.00815569	0.00923549	0.00502286	0.00542812	0.0060618	0.0085501	0.00318463	0.00245492	0.0019278	0.00474153	0.00807713	0.00150288	0.00238487	0.00285644	0.0033693
401	0.00582172	0.00736323	0.00933215	0.00921288	0.00483701	0.00503393	0.00738022	0.00831414	0.00932158	0.00495221	0.00546386	0.00617786	0.00885935	0.00322588	0.00245488	0.00200791	0.00491177	0.00812798	0.00150688	0.00229352	0.0029229	0.00349959
400	0.00571348	0.00756048	0.00939012	0.0093761	0.00492965	0.00514564	0.00744549	0.00854125	0.00948523	0.00495769	0.00552664	0.00629639	0.00909395	0.00320991	0.00249866	0.00216792	0.00488233	0.00827001	0.0016033	0.00242465	0.00285584	0.00362302
399	0.00573637	0.00756973	0.00963117	0.0096239	0.0048344	0.00514069	0.0074055	0.00863272	0.00967369	0.00497438	0.00546933	0.00632378	0.0091384	0.00311566	0.00253422	0.0022234	0.0050651	0.00828499	0.00144647	0.00240522	0.00307192	0.00363068
398	0.00586631	0.00762497	0.00987083	0.00974845	0.00495115	0.0052	0.00759794	0.00876038	0.00988109	0.00504294	0.00561583	0.00642592	0.00927932	0.00310776	0.00261534	0.00232881	0.00507101	0.00838155	0.00133944	0.00230047	0.00318397	0.00371283
397	0.00587175	0.00765621	0.0101625	0.0099955	0.0049836	0.00525671	0.00770507	0.00898279	0.00997838	0.00507139	0.00576227	0.00647528	0.00941857	0.0031701	0.00274294	0.00227957	0.00510192	0.00865757	0.00131519	0.00238624	0.00319814	0.00371932
396	0.00593095	0.00779149	0.0103152	0.0102138	0.0049383	0.00534055	0.00785841	0.00907639	0.0102304	0.0052142	0.00586211	0.00670809	0.00958977	0.0031196	0.00267238	0.00237926	0.00517605	0.00869792	0.0013553	0.00236288	0.00310683	0.00365456
395	0.00590315	0.00778219	0.0102372	0.0102098	0.00489186	0.0053026	0.00785019	0.00907706	0.0102654	0.00509582	0.00560037	0.00667261	0.00955939	0.00310052	0.00267741	0.00241093	0.00524413	0.0088697	0.00132463	0.00231837	0.00306113	0.00376557
394	0.00578788	0.00774926	0.0102813	0.0102067	0.00480171	0.00522081	0.00779456	0.00918655	0.0104048	0.00499046	0.00558214	0.00653948	0.00969029	0.00315074	0.0027104	0.00247324	0.00530359	0.0089548	0.00125938	0.00245169	0.00313098	0.00386102
393	0.00590171	0.00802401	0.0105135	0.0104931	0.00504423	0.0054164	0.00795764	0.00948262	0.0105122	0.00531715	0.00577318	0.00675828	0.00993946	0.00325238	0.00260113	0.0025487	0.00551304	0.00914877	0.00139117	0.00257563	0.00313205	0.00406328
392	0.00610147	0.00820887	0.010673	0.010846	0.00507117	0.00551076	0.00807946	0.00961998	0.0107026	0.00533929	0.00589644	0.006898	0.0101121	0.00327903	0.00249095	0.00255337	0.00563771	0.00923593	0.0016566	0.00273186	0.00342748	0.00435654
391	0.00596342	0.00818474	0.0107148	0.010935	0.00489085	0.00539371	0.00810645	0.00961689	0.0108907	0.00524815	0.00593046	0.00688958	0.0101806	0.00328529	0.00256648	0.00255197	0.00583685	0.00926346	0.00162158	0.00273049	0.0036079	0.00430655
390	0.00596336	0.00805826	0.0108232	0.0108413	0.00493718	0.00549445	0.00800585	0.00969139	0.0110066	0.00514267	0.00592404	0.00697533	0.0102223	0.00317651	0.0026244	0.00262564	0.00584974	0.00945796	0.00137185	0.00248396	0.0032825	0.00432534
389	0.00607382	0.00822027	0.0109847	0.0109891	0.00506175	0.00564608	0.00819331	0.00987358	0.0112527	0.00541812	0.00595946	0.00707882	0.010394	0.00328004	0.00272163	0.00268411	0.00585419	0.00957855	0.0014354	0.00246549	0.00322544	0.00445427
388	0.00609819	0.00833194	0.0110486	0.0112673	0.00520252	0.00561263	0.00832469	0.00996616	0.0113667	0.00540557	0.00593543	0.00714332	0.0106192	0.00328377	0.00275513	0.00274621	0.00586807	0.00967038	0.00165561	0.00280935	0.00375039	0.00464778
387	0.0060477	0.00830418	0.0110644	0.0112949	0.0051673	0.00547201	0.00828418	0.00999057	0.0112612	0.00525421	0.00586314	0.00700833	0.0106843	0.00339984	0.00267565	0.00285187	0.00602246	0.0097963	0.00162005	0.00281136	0.00390584	0.00466447
386	0.00612425	0.00829842	0.0112202	0.0114087	0.00508788	0.00557624	0.00842131	0.010065	0.0113691	0.00527674	0.00601793	0.00721521	0.0107378	0.00337745	0.00278879	0.00288299	0.00614654	0.00989173	0.00144517	0.00268824	0.00374033	0.00456082
385	0.00615103	0.00841802	0.011373	0.0114458	0.00520507	0.00568046	0.00846019	0.0101831	0.011546	0.00543456	0.0060167	0.00734394	0.0107464	0.00336247	0.00286882	0.00273997	0.00609922	0.00997133	0.00144969	0.00267577	0.00369142	0.00475584
384	0.00601525	0.00838644	0.0112393	0.0116321	0.00531167	0.00557543	0.00839537	0.0102374	0.0115317	0.00541371	0.0059873	0.0072179	0.0109597	0.00335815	0.00277374	0.00276715	0.00624715	0.00994133	0.00144736	0.00276669	0.00370455	0.0047952
383	0.00611399	0.00855364	0.0113822	0.0118448	0.00527526	0.00562227	0.00842535	0.0104271	0.0117156	0.00554529	0.0061093	0.0073719	0.0111103	0.00338178	0.0027942	0.00279371	0.00615539	0.00995981	0.0014831	0.00268862	0.00377016	0.0049213
382	0.00599852	0.00853004	0.0113014	0.0116909	0.00503682	0.00554404	0.00837713	0.010287	0.0116344	0.00543133	0.00608029	0.00736887	0.0110414	0.00339243	0.00286066	0.00297587	0.00618501	0.0101019	0.00171781	0.00294145	0.00400767	0.00505062
381	0.00603529	0.00856653	0.0113895	0.0116894	0.00506048	0.00559933	0.00850969	0.0104273	0.011658	0.00544743	0.00614939	0.00742516	0.0111956	0.0034847	0.0029365	0.00291529	0.00631958	0.0101814	0.00179459	0.00303298	0.00413519	0.00517418
380	0.00599443	0.00836869	0.0113728	0.0116015	0.00496626	0.00555418	0.00845447	0.0102009	0.0117369	0.0053008	0.00595564	0.00731349	0.0109987	0.00345667	0.00291374	0.00289159	0.00638177	0.0103219	0.00181041	0.00299463	0.00419628	0.00511402
379	0.00597199	0.00847088	0.0114224	0.0117342	0.00506717	0.00565421	0.00852743	0.0102357	0.0118619	0.00535095	0.00611468	0.00728005	0.0111811	0.00352281	0.00275904	0.00295194	0.00649102	0.0102652	0.00166711	0.00292434	0.00417895	0.00519381
378	0.00602464	0.0086307	0.0115612	0.0118716	0.00515854	0.00563985	0.00859514	0.0103693	0.0118914	0.00547425	0.00617394	0.00743702	0.0113328	0.00352442	0.00281703	0.00296718	0.00647801	0.010234	0.00162302	0.00294786	0.00426651	0.00524738
377	0.00612915	0.0088289	0.0116059	0.011996	0.0051512	0.00576482	0.00876842	0.0104636	0.0120737	0.00560211	0.0061883	0.00759594	0.0114005	0.00347366	0.00286996	0.0028362	0.00633859	0.0102626	0.00160488	0.00277035	0.00389402	0.00496317
376	0.00620564	0.00882948	0.0116232	0.0120377	0.00516156	0.00585045	0.00888256	0.0105234	0.0120782	0.00562084	0.00621108	0.00765823	0.011477	0.00348332	0.00294692	0.00283261	0.00629	0.0101673	0.00174561	0.00284626	0.00411021	0.00516642
375	0.00611151	0.00869269	0.0116244	0.0119075	0.00529149	0.00573483	0.00875781	0.0105162	0.0119993	0.00551961	0.00623617	0.007515	0.0115001	0.00352569	0.00291922	0.00299188	0.00632948	0.0102093	0.00183797	0.00298827	0.00425848	0.00539282
374	0.00629725	0.00890149	0.0117404	0.0120915	0.00544218	0.00601819	0.00887488	0.0107185	0.0121484	0.00577046	0.00640509	0.00772685	0.0116538	0.00356324	0.00298946	0.00304391	0.00631906	0.0101733	0.00165199	0.00304793	0.0040656	0.0053207
373	0.00625711	0.00892421	0.0117611	0.0121241	0.00531991	0.00598623	0.00885874	0.010721	0.0120924	0.00579301	0.00631595	0.00790009	0.0116007	0.00343358	0.00299784	0.00303845	0.00638815	0.0103066	0.00176968	0.00319439	0.00424073	0.00541254
372	0.00630842	0.00889406	0.0118209	0.0121507	0.00529397	0.0060126	0.00883169	0.0106808	0.0120354	0.00574205	0.00654414	0.00784107	0.0115725	0.00361011	0.00305676	0.00294872	0.00634092	0.0103612	0.00161531	0.00314533	0.00417112	0.00523138
371	0.00639699	0.00873804	0.0117655	0.0121117	0.00527716	0.00588763	0.00871773	0.0106376	0.0120444	0.005855	0.00650787	0.00774354	0.011634	0.00349448	0.00305752	0.00293815	0.00635654	0.0105729	0.0016071	0.00292601	0.00399272	0.00519001
370	0.00639286	0.00904237	0.011874	0.0119911	0.00544355	0.0060521	0.00904997	0.0106329	0.0120154	0.00585467	0.0065186	0.00785784	0.0115665	0.0035516	0.00304883	0.003134	0.00630245	0.0101874	0.00186458	0.00312411	0.00429701	0.00540541
369	0.00634439	0.00892813	0.0117532	0.0120135	0.00553339	0.00612688	0.00905765	0.0105504	0.012075	0.00592149	0.006502	0.00786108	0.0116257	0.0034542	0.00313881	0.0029312	0.00634551	0.0101238	0.00173476	0.00304858	0.00428324	0.00526823
368	0.00644922	0.00911107	0.0117932	0.0120886	0.00577141	0.00622205	0.009179	0.0107808	0.0122068	0.00607065	0.00660284	0.00794188	0.0117251	0.00355887	0.00319664	0.0027776	0.00635072	0.0101625	0.0017995	0.00308539	0.00413337	0.00513019
367	0.00644029	0.0090989	0.011788	0.0120226	0.00561417	0.00627274	0.00908486	0.0107071	0.0121297	0.00600921	0.00669617	0.00800045	0.0116791	0.00359093	0.00318875	0.00285787	0.00632787	0.0101361	0.00177559	0.00330014	0.00409013	0.00539492
366	0.00643172	0.00902081	0.0117414	0.0119467	0.00560968	0.00621734	0.00905682	0.0106777	0.0121624	0.00604839	0.00666849	0.00803886	0.011562	0.00360038	0.00321318	0.00276169	0.00612755	0.0100254	0.00174276	0.00306036	0.00402456	0.00525641
365	0.00662452	0.00904297	0.0117808	0.0120542	0.00567899	0.00627246	0.00914335	0.0108084	0.0119554	0.00616519	0.00676079	0.00804763	0.0116666	0.00356217	0.00333328	0.00273963	0.00614937	0.0101438	0.00175161	0.00305361	0.00388143	0.00519212
364	0.00646961	0.0089711	0.0115793	0.0117912	0.00553412	0.0061057	0.00902628	0.0106017	0.0116598	0.00601704	0.00666059	0.00793123	0.0113345	0.00353064	0.00317648	0.00274124	0.00608712	0.00989507	0.00196466	0.0032905	0.00415844	0.00519824
363	0.00647672	0.00904694	0.011548	0.0116803	0.00557408	0.00620867	0.00895148	0.010441	0.0116296	0.00600676	0.00664293	0.00793319	0.0114532	0.00364058	0.00314676	0.00280128	0.00601	0.00974126	0.00180728	0.00309679	0.00417697	0.00506593
362	0.00643336	0.00909185	0.0115996	0.0117327	0.00559208	0.00633694	0.00900553	0.0106209	0.011704	0.00614274	0.0066869	0.00807416	0.0115132	0.00367703	0.00313324	0.00274047	0.00609826	0.00968833	0.00189505	0.00329626	0.00421793	0.00515997
361	0.00664653	0.0092849	0.0116637	0.0118308	0.00583586	0.00651826	0.0092555	0.0105951	0.0119139	0.00631891	0.00688509	0.00817677	0.0115167	0.00374839	0.00321281	0.00272713	0.00593546	0.00983833	0.00181346	0.00334111	0.00407811	0.00529088
360	0.00653978	0.00911814	0.011365	0.0115776	0.00575468	0.00640192	0.00913357	0.0102914	0.0116592	0.0062745	0.00676844	0.0079776	0.0112989	0.00374925	0.00309327	0.00268158	0.00588019	0.00974504	0.00168905	0.00320862	0.00399205	0.0052243
359	0.00645763	0.00904788	0.0112618	0.0114781	0.00586599	0.00637484	0.00911381	0.0103331	0.0113656	0.00621405	0.00687428	0.00781393	0.0112742	0.00365304	0.0032158	0.00269577	0.00595132	0.00956391	0.00180802	0.00338462	0.0040422	0.00515249
358	0.00652131	0.00911185	0.0112838	0.0114749	0.00579586	0.00629053	0.00916138	0.0102641	0.0113818	0.00611874	0.00678906	0.00780689	0.0113768	0.00371072	0.00325091	0.00260555	0.00584821	0.0095216	0.00191622	0.00351682	0.0041581	0.00510188
357	0.00658312	0.00903016	0.0113117	0.0114099	0.00572843	0.00636407	0.00916265	0.0101692	0.0113706	0.00620285	0.00693781	0.00781283	0.01119	0.00367099	0.00326615	0.0025222	0.00562445	0.00944864	0.00186607	0.00322616	0.00404683	0.00500073
356	0.00661616	0.00903936	0.0113544	0.0114342	0.00591214	0.00631099	0.00921381	0.0101457	0.0112744	0.00632627	0.00692875	0.00789809	0.0110635	0.00370429	0.00320525	0.00227109	0.00551235	0.00949365	0.001853	0.00318306	0.00408916	0.00502189
355	0.00673767	0.00902029	0.011263	0.0113219	0.00608003	0.00636464	0.00929728	0.0101606	0.0111994	0.00628111	0.00689792	0.00795255	0.0110601	0.00372013	0.00303853	0.00238616	0.0056189	0.00946037	0.00161979	0.00304082	0.00379927	0.00481797
354	0.00681867	0.00896318	0.0111949	0.011159	0.00606119	0.00642661	0.00915131	0.010139	0.0111056	0.00632922	0.00686321	0.00788904	0.0110128	0.00357483	0.00312438	0.00226848	0.00548611	0.00927103	0.00172856	0.00314419	0.00390329	0.00469569
353	0.00679995	0.00908201	0.011284	0.01104	0.00613569	0.00644178	0.00915516	0.0100987	0.0110807	0.00641071	0.00696712	0.00798105	0.01096	0.0036174	0.00317356	0.00224947	0.00548643	0.00903907	0.00188733	0.00323463	0.00392865	0.00463402
352	0.00669284	0.00886751	0.0111951	0.010862	0.00594548	0.00649498	0.00896409	0.00989896	0.0109086	0.00627725	0.00678324	0.0078616	0.0108543	0.00380409	0.00314842	0.00225617	0.00544575	0.0090513	0.00191604	0.00335044	0.0039611	0.00461238
351	0.00676751	0.00894472	0.0110127	0.0109299	0.00597413	0.0065459	0.00910802	0.00989869	0.0109971	0.00636304	0.00685591	0.00787678	0.0109206	0.00385552	0.00321787	0.00220824	0.00526381	0.00903578	0.00178501	0.00319479	0.00385924	0.00454447
350	0.00687361	0.00909466	0.0109859	0.0108626	0.00602986	0.00647765	0.00901299	0.00970951	0.0108476	0.00635971	0.00690481	0.00778724	0.0107019	0.00376097	0.00323823	0.00200641	0.00511244	0.00901534	0.00207451	0.00323148	0.00397983	0.00482237
349	0.00674878	0.0089022	0.0109635	0.0106593	0.00611193	0.0062468	0.00890713	0.0097584	0.0107075	0.00627438	0.00701932	0.00764874	0.0105174	0.00379671	0.00313514	0.00197078	0.00516724	0.00892567	0.00186046	0.00310536	0.00377097	0.00463521
348	0.00677228	0.00878762	0.010765	0.0105807	0.00609894	0.00626761	0.00888737	0.00978717	0.0107334	0.0063963	0.00700099	0.00766274	0.0104563	0.00372525	0.00315884	0.00198705	0.00501672	0.00875664	0.0018706	0.00297488	0.00361714	0.00452147
347	0.00677701	0.00885197	0.0106068	0.0104629	0.00599727	0.0063667	0.00888006	0.00962497	0.010613	0.00641749	0.00690972	0.00770604	0.010328	0.00379338	0.00319361	0.00191455	0.00481221	0.00868982	0.00200654	0.00299871	0.00370384	0.00453954
346	0.00671595	0.00866184	0.0105227	0.0102442	0.00602529	0.00639354	0.00883625	0.00947177	0.0103729	0.0062602	0.00676115	0.00750954	0.010215	0.00379946	0.00307537	0.00202978	0.00469963	0.008543	0.00181689	0.00311774	0.00364141	0.00430885
345	0.00678944	0.00858426	0.0105269	0.0101207	0.00614472	0.00631907	0.00873991	0.00937604	0.00997324	0.00621978	0.0067309	0.0074326	0.0102088	0.00373212	0.00305426	0.00187498	0.00466884	0.00855379	0.00194344	0.00321008	0.00367457	0.00443544
344	0.00690833	0.00858142	0.0105991	0.0101944	0.00627764	0.00638066	0.00881574	0.00937953	0.0100969	0.0063964	0.00683347	0.00747748	0.0103404	0.00370225	0.00311673	0.00190275	0.00468423	0.00838574	0.00193712	0.00313011	0.00351262	0.00430508
343	0.00698786	0.00875709	0.0105997	0.0103011	0.00636175	0.00654583	0.00897155	0.00938414	0.0102751	0.00656136	0.00689649	0.00767969	0.0104095	0.0036453	0.00299913	0.00175161	0.00463581	0.00836421	0.00194102	0.003135	0.00343406	0.00442126
342	0.00708039	0.00875698	0.0106639	0.0103785	0.00648225	0.00657867	0.00912182	0.00942647	0.0101763	0.00665422	0.0069645	0.00771582	0.0102468	0.00371487	0.00303327	0.00165838	0.00449804	0.00831165	0.00162515	0.00315864	0.00335902	0.00424373
341	0.00709143	0.0087371	0.0105431	0.010022	0.00629394	0.00643558	0.00889416	0.00929104	0.00992145	0.00655311	0.00694389	0.00752991	0.00993735	0.00355079	0.00300283	0.00166135	0.00437558	0.00826561	0.00184185	0.00310142	0.00354602	0.00408219
340	0.00715419	0.00855873	0.0105005	0.00996665	0.00653196	0.00656708	0.0088589	0.00908237	0.00973851	0.00648017	0.00702067	0.00735177	0.0100624	0.00359931	0.00294067	0.00168577	0.00442279	0.00829023	0.00150298	0.00258669	0.00309766	0.00380673
339	0.0071579	0.00832414	0.0102208	0.00971618	0.00643501	0.00646241	0.00872457	0.00882136	0.00940321	0.00627767	0.00682534	0.00712639	0.00963933	0.00348937	0.00290963	0.00168757	0.00434187	0.0082438	0.00148158	0.00269809	0.00304589	0.00381414
338	0.00717441	0.00824827	0.0101456	0.00951368	0.00640458	0.0063803	0.00864494	0.00858908	0.00930465	0.0061588	0.00672249	0.00703913	0.00943969	0.00345504	0.00278119	0.00147139	0.00406041	0.00813703	0.00160045	0.00280563	0.00296986	0.00375864
337	0.00723266	0.00832041	0.0100699	0.00965687	0.00662769	0.00645078	0.00872692	0.00868481	0.00928289	0.0063115	0.00674559	0.00711079	0.00948075	0.00354173	0.00283524	0.00151709	0.00411622	0.00806454	0.00157975	0.00256395	0.00271701	0.00345146
336	0.00747653	0.0083867	0.0101867	0.0096293	0.0066735	0.00655574	0.00881583	0.00879146	0.0094052	0.00631899	0.00673596	0.00721392	0.00946737	0.00340887	0.00275359	0.00151963	0.00398454	0.00787748	0.00151316	0.00251768	0.00275087	0.00341179
335	0.00743462	0.00833746	0.0101557	0.00952881	0.00657445	0.00646357	0.0086528	0.00871807	0.00932615	0.00638739	0.00681098	0.00708567	0.00935153	0.00326901	0.00276025	0.00127689	0.00394382	0.00776188	0.00139359	0.00260606	0.0026581	0.00340124
334	0.00735192	0.00821778	0.00998024	0.00946102	0.00659456	0.00638571	0.00850262	0.00848072	0.00896434	0.00624472	0.00676861	0.00691435	0.00918146	0.0034466	0.00289072	0.00131882	0.00385793	0.00771474	0.00149755	0.00260224	0.00269888	0.00346815
333	0.00745406	0.00819889	0.00988157	0.00934153	0.00668352	0.00624581	0.00851614	0.00839355	0.00889093	0.00626389	0.00667019	0.00697446	0.00919821	0.00337627	0.00278561	0.00128558	0.00368903	0.00772418	0.00165064	0.0026591	0.00281157	0.00370732
332	0.00756335	0.00830083	0.00993548	0.00931625	0.0068696	0.00626674	0.00866463	0.00866839	0.00897072	0.006308	0.00674727	0.00716615	0.00928501	0.00330431	0.00280318	0.00132225	0.00350987	0.00768698	0.00162589	0.00266538	0.00276861	0.00353919
331	0.00761695	0.00821517	0.00993886	0.00920898	0.00708195	0.00629523	0.00854553	0.00859803	0.00892467	0.00634504	0.00666984	0.00702972	0.00921783	0.00325967	0.00278001	0.00123366	0.0033616	0.00756157	0.00140909	0.00241423	0.00258129	0.0032695
330	0.00760998	0.00828786	0.00999262	0.00919963	0.00701606	0.00635403	0.00863074	0.00836932	0.00888099	0.00632057	0.00672351	0.00691586	0.00895989	0.0031669	0.0026612	0.00125722	0.00344814	0.00748403	0.00145283	0.00244874	0.00268054	0.00321724
329	0.00770509	0.0083808	0.00987926	0.009221	0.00698703	0.00629323	0.00864919	0.00820774	0.00868617	0.00622932	0.00659179	0.00684395	0.00890259	0.00310143	0.00261137	0.00111999	0.00345998	0.00754195	0.00132338	0.00249909	0.00260648	0.00326793
328	0.00792812	0.00836334	0.00981343	0.0091638	0.00709189	0.00624502	0.00863808	0.00840139	0.00877297	0.00628624	0.0065498	0.00688784	0.00891509	0.00318627	0.00261713	0.00115229	0.00337624	0.00751091	0.00137505	0.00269337	0.00264975	0.00352086
327	0.00795408	0.00814896	0.00964255	0.00913244	0.00706458	0.00609805	0.00851923	0.00828648	0.00864991	0.00624357	0.00659937	0.00682266	0.00882469	0.003116	0.00257799	0.001167	0.00331705	0.00754082	0.00141543	0.00263188	0.00276716	0.00342438
326	0.00794973	0.0081705	0.00962796	0.00890044	0.00719349	0.00615226	0.00840003	0.00802432	0.00854828	0.00611165	0.00643888	0.00672662	0.0086461	0.00331954	0.00246464	0.000996812	0.00335257	0.00739196	0.00155357	0.00245755	0.00285927	0.00324882
325	0.00827583	0.00828588	0.00961925	0.00887781	0.00745054	0.00618097	0.00838654	0.0080323	0.00855374	0.00602248	0.00650567	0.00673054	0.00886278	0.00338238	0.00261302	0.00101497	0.00317784	0.00732907	0.00149296	0.00255482	0.00274778	0.00321172
324	0.00831428	0.00822324	0.00969624	0.00886749	0.00747592	0.00622562	0.0084185	0.00808926	0.0084754	0.00602747	0.00652673	0.00666505	0.00888901	0.00329619	0.0026506	0.000972463	0.0032793	0.00726767	0.0012879	0.00252691	0.00266439	0.00310267
323	0.0085121	0.00823055	0.00975643	0.00906209	0.00765589	0.00629883	0.0085757	0.00818172	0.00842574	0.00624001	0.00658445	0.00676214	0.00875181	0.00316683	0.00258421	0.000949501	0.00322118	0.00729662	0.00138179	0.00258787	0.00262794	0.00314714
322	0.00876482	0.00824906	0.00974497	0.00893883	0.00774857	0.00635738	0.00857392	0.00812174	0.00840256	0.00629047	0.00665204	0.00681965	0.00875858	0.00318339	0.00250142	0.00080144	0.00303835	0.00756795	0.00146324	0.00263387	0.00267602	0.00341084
321	0.00890362	0.0082804	0.00959825	0.00888776	0.00784465	0.00627828	0.00861222	0.00812969	0.0085583	0.0063051	0.00650012	0.0069432	0.00880861	0.00313247	0.00240106	0.000818078	0.00303039	0.00765931	0.0013567	0.00266037	0.00260362	0.00352442
320	0.00900167	0.00833391	0.00967759	0.0088977	0.00804184	0.00628014	0.00867853	0.00817937	0.00850295	0.00636561	0.00652097	0.00688741	0.00873076	0.00314585	0.00241267	0.000705663	0.00301843	0.0076834	0.00126949	0.00273515	0.002703	0.00347752
319	0.0092697	0.00837254	0.00968118	0.00893229	0.00835106	0.00631085	0.00870233	0.00811193	0.00851656	0.00636854	0.0066833	0.00683711	0.00881546	0.00330933	0.00241779	0.000680195	0.00304042	0.00784695	0.00133411	0.00258854	0.00258046	0.00324298
318	0.00935596	0.00840959	0.00970776	0.00881991	0.00842689	0.00632225	0.0085849	0.00804186	0.00847884	0.00634255	0.0065372	0.00680177	0.00879538	0.0031837	0.00252035	0.00082683	0.00294812	0.00792182	0.00124165	0.0025073	0.00244276	0.00330483
317	0.00953568	0.00839299	0.00988261	0.00893479	0.00860811	0.00631485	0.00880315	0.00810906	0.00848989	0.00628982	0.00661597	0.0068896	0.0087471	0.00293109	0.00248893	0.000734728	0.00301745	0.00784407	0.00128907	0.00278734	0.00258379	0.00367063
316	0.0097129	0.00851666	0.00993852	0.00895223	0.00879271	0.00629554	0.00889509	0.00819624	0.0084457	0.00644693	0.00685925	0.00693556	0.00876163	0.00307956	0.00243965	0.00069202	0.00296439	0.008012	0.00130372	0.00265148	0.00258844	0.00358495
315	0.00996169	0.00864452	0.00996268	0.0089575	0.00897496	0.00647284	0.00895912	0.00822304	0.00860922	0.00661925	0.00683159	0.00708603	0.00884276	0.00313484	0.00252156	0.000666089	0.00300516	0.0083909	0.00150304	0.00284713	0.00287047	0.00394063
314	0.00993588	0.00837423	0.00988204	0.00885868	0.00904281	0.00633035	0.00872009	0.00809095	0.00851216	0.00645269	0.00671611	0.00695405	0.0088509	0.00318129	0.00244544	0.000513364	0.00302571	0.00869932	0.00155146	0.00299716	0.00312722	0.00431952
313	0.0102292	0.00845249	0.00998573	0.00896225	0.00925291	0.00632392	0.00881485	0.00813733	0.00854346	0.00658183	0.00688174	0.00696634	0.00906011	0.00319953	0.00250137	0.000538929	0.00310913	0.0091279	0.00144029	0.00279332	0.00292429	0.0042799
312	0.0104243	0.0086701	0.0102206	0.00910468	0.0095278	0.00642847	0.0088604	0.00823403	0.00864877	0.00662616	0.00692956	0.00706815	0.00914095	0.00321606	0.00254201	0.000630361	0.00317001	0.00927197	0.00160555	0.00277591	0.00298873	0.00465376
311	0.0106359	0.00881224	0.0104238	0.00920488	0.00989653	0.00665156	0.00904089	0.00843976	0.00874981	0.00676638	0.00707034	0.00717459	0.00923022	0.00330803	0.00265178	0.000630776	0.00327541	0.0097437	0.00188656	0.00288592	0.00305555	0.00493928
310	0.0110237	0.00896882	0.0104896	0.00933304	0.0102156	0.0067501	0.00919918	0.00852131	0.00881332	0.0069034	0.00711182	0.00738249	0.00945302	0.00341488	0.00264375	0.000600508	0.00345168	0.0104683	0.0018136	0.00296584	0.00305632	0.00505866
309	0.0114766	0.00908274	0.0104967	0.00945981	0.0105197	0.00690392	0.00934705	0.00880764	0.00903719	0.00702582	0.00739283	0.00759711	0.00970486	0.00353747	0.00276226	0.000879983	0.00339045	0.011148	0.00192106	0.00325662	0.00351636	0.00571041
308	0.0118704	0.00929758	0.0109046	0.00994922	0.0110185	0.00734955	0.00969892	0.00908092	0.00931601	0.00732882	0.00763318	0.00783643	0.0100454	0.00359272	0.00303578	0.000992798	0.00354901	0.0117625	0.00199123	0.00341336	0.00372968	0.00608364
307	0.0123533	0.00969745	0.0112554	0.0102225	0.011536	0.00759208	0.0100685	0.00933933	0.0097683	0.00766633	0.00784788	0.00812419	0.0104163	0.0038209	0.00322306	0.00113193	0.00380608	0.0127198	0.0021973	0.00360999	0.00416154	0.00647819
306	0.0130241	0.0102204	0.0115992	0.010616	0.0120197	0.00800502	0.010516	0.00973065	0.0102029	0.00819176	0.0083685	0.00868932	0.0109846	0.00419113	0.00346107	0.00139705	0.004229	0.0137306	0.00235856	0.00369503	0.00439045	0.00687119
305	0.0138585	0.0110439	0.0123356	0.0114153	0.0128695	0.00875856	0.0112022	0.0104506	0.0108772	0.00888125	0.0091123	0.00933488	0.0118415	0.00464953	0.00403705	0.00172799	0.00456817	0.0147908	0.00255886	0.00400293	0.00451089	0.00754848
304	0.0147947	0.011799	0.013233	0.012243	0.0139451	0.00968749	0.012061	0.0113388	0.0117816	0.00973218	0.00987478	0.00996013	0.0126666	0.0051806	0.00464645	0.00246311	0.00508627	0.0158916	0.00287756	0.00452748	0.00493573	0.00809197
303	0.0159861	0.012799	0.0142622	0.0131948	0.0150964	0.0106092	0.0131171	0.0123287	0.0126765	0.0107987	0.0108246	0.0111266	0.0137319	0.00576019	0.00508305	0.00301946	0.00587801	0.0168474	0.0032533	0.00478033	0.00543913	0.0086281
302	0.0174981	0.0140557	0.0155254	0.0145547	0.016587	0.0118633	0.0144784	0.0135347	0.0139297	0.0120479	0.0120696	0.0124506	0.0151107	0.00670375	0.0057809	0.00370731	0.00665423	0.018197	0.0039117	0.00541791	0.00607047	0.00941469
301	0.0191269	0.0155248	0.0169913	0.0159515	0.0182567	0.0134455	0.0158891	0.0150226	0.0154143	0.0133292	0.013443	0.0138251	0.0165693	0.00758711	0.00694173	0.00468967	0.00743943	0.0196869	0.00470185	0.00625725	0.00682439	0.0106372
300	0.020918	0.0173057	0.0186406	0.0177091	0.0201588	0.0152028	0.0176021	0.0168284	0.0172404	0.015034	0.0152766	0.0155756	0.0184449	0.0086928	0.00836039	0.00573102	0.00859974	0.0213406	0.00533604	0.00687155	0.00752627	0.011627
299	0.0232193	0.019459	0.0208333	0.0198715	0.0224446	0.0173093	0.01981	0.0188672	0.0192093	0.0172417	0.0174431	0.0177858	0.0205527	0.0100357	0.00947215	0.00717488	0.0101523	0.0230518	0.00610045	0.00762167	0.0083996	0.0126638
298	0.0258312	0.021793	0.0233193	0.0222163	0.024996	0.0198344	0.0224344	0.0211883	0.0214816	0.0197452	0.0198877	0.0201024	0.0229656	0.0117412	0.0111614	0.00888305	0.0118313	0.024917	0.00706637	0.00873372	0.00951185	0.0138479
297	0.028771	0.0246775	0.026315	0.0250583	0.0279707	0.0227608	0.0253353	0.0240986	0.0243728	0.022614	0.0227127	0.0229312	0.0259182	0.0137422	0.0131811	0.0107163	0.0136648	0.0271089	0.00810527	0.00978267	0.0106504	0.0149875
296	0.0324044	0.0282571	0.0299072	0.0287258	0.0316022	0.0262151	0.0288997	0.0276446	0.0279288	0.0260426	0.0260642	0.0265685	0.0295055	0.0160243	0.0155331	0.0132992	0.0160197	0.0296144	0.00952403	0.0111783	0.0119999	0.0163828
295	0.0366092	0.0324373	0.0341343	0.032906	0.0358556	0.0304023	0.0330883	0.0318953	0.0320969	0.0300491	0.0301839	0.0306199	0.0335561	0.0187639	0.0182987	0.0160604	0.0187716	0.0325355	0.011144	0.0128328	0.013619	0.0182163
294	0.0414211	0.037231	0.0389309	0.0377653	0.0407901	0.0350687	0.0378804	0.0367146	0.0368901	0.0347513	0.0347852	0.0353238	0.0382985	0.0219605	0.0214189	0.0193164	0.0219497	0.0359815	0.0128804	0.0145782	0.0155996	0.0199223
293	0.0466793	0.0424411	0.0442479	0.043052	0.0460756	0.0403091	0.0432239	0.0418469	0.042009	0.0398122	0.0399378	0.0405466	0.0434646	0.0252557	0.024876	0.0229452	0.0254067	0.0391998	0.014876	0.0166583	0.0175904	0.0217337
292	0.0515601	0.0470136	0.0489817	0.0478214	0.0509306	0.0451271	0.0481214	0.0465991	0.0465422	0.0445924	0.0446301	0.0453307	0.0481024	0.0284685	0.0280021	0.0262524	0.0283742	0.0420661	0.0167749	0.0186925	0.0193565	0.0235907
291	0.0553022	0.050835	0.0528271	0.0515149	0.0548553	0.0489018	0.0519013	0.0503734	0.0502562	0.0484072	0.048292	0.0490302	0.0517123	0.0309642	0.0306726	0.0291215	0.0308473	0.0441806	0.0182899	0.0201323	0.0208737	0.0249002
290	0.0586879	0.0543312	0.0562583	0.0548241	0.0584796	0.0523771	0.0553429	0.0536919	0.0534839	0.051714	0.0517455	0.0523812	0.0550278	0.0331173	0.033007	0.0313458	0.0329054	0.0457737	0.0193857	0.0212338	0.0218196	0.0256308
289	0.0622398	0.0577449	0.0598786	0.0583737	0.0622217	0.0559677	0.0589641	0.0571742	0.0568628	0.055271	0.0553582	0.0558747	0.0583845	0.0354837	0.035576	0.03353	0.0351063	0.047599	0.0208218	0.022699	0.0232417	0.0265803
288	0.066343	0.0616884	0.0638814	0.0621525	0.0662651	0.0599508	0.0630639	0.0610666	0.0608309	0.0591345	0.0592465	0.0597236	0.062245	0.038206	0.038287	0.0362657	0.0377051	0.0497698	0.0223332	0.0244242	0.0245439	0.0276974
287	0.0705586	0.0659579	0.0682688	0.0664173	0.0705269	0.0641584	0.0673268	0.0652319	0.0648579	0.0632512	0.0634481	0.0638712	0.0663737	0.0411695	0.0410326	0.0393083	0.0402849	0.051976	0.0239715	0.0258758	0.0260342	0.028811
286	0.0744652	0.0696681	0.0721071	0.0703276	0.0744839	0.0679806	0.071304	0.0689941	0.0687081	0.0670311	0.0672186	0.067608	0.0701649	0.0438597	0.0437607	0.041918	0.0430151	0.0540848	0.0254537	0.0272914	0.0275155	0.0299606
285	0.077487	0.0725501	0.0750598	0.0733686	0.0774345	0.0708645	0.07422	0.0720094	0.0717008	0.0698245	0.0699118	0.0704826	0.0730404	0.0459793	0.0460783	0.0439949	0.0450718	0.0557208	0.0267594	0.0285268	0.0286077	0.0308594
284	0.0795628	0.074718	0.0772376	0.0754861	0.0794793	0.0730438	0.0764175	0.07428	0.0738506	0.0719901	0.0720108	0.0727169	0.0750826	0.0475823	0.0475741	0.0455582	0.0466411	0.0569258	0.0275918	0.0294633	0.029366	0.0313554
283	0.0811335	0.0763513	0.0788019	0.0770826	0.0810247	0.0745888	0.0780564	0.0759119	0.0753051	0.0735362	0.0736027	0.0742604	0.0765113	0.0487079	0.0487889	0.0466747	0.0478592	0.0578491	0.0280029	0.0298758	0.0297783	0.0317108
282	0.082506	0.0776692	0.0802191	0.0784218	0.0823728	0.0759023	0.0794019	0.0769632	0.0764688	0.0747337	0.0749976	0.0755388	0.077771	0.0497071	0.0497378	0.0475883	0.0487132	0.0584404	0.0284598	0.0303634	0.030224	0.0321738
281	0.0835022	0.0785418	0.0811646	0.0791763	0.0832775	0.076751	0.0803866	0.0780659	0.0774277	0.075724	0.0759598	0.0765025	0.078661	0.0504259	0.0504935	0.0480552	0.0493632	0.0588613	0.0289652	0.0308159	0.030662	0.0322649
280	0.0839496	0.0790472	0.0815949	0.0796326	0.0837703	0.0772498	0.0809627	0.0784874	0.077897	0.0761849	0.0764009	0.0769186	0.0790805	0.0511086	0.0510311	0.0483711	0.049782	0.0590358	0.0289993	0.0308709	0.0305979	0.0320259
279	0.0839389	0.0790626	0.0816809	0.0795669	0.0837409	0.0772782	0.0810561	0.078457	0.0778156	0.0760689	0.0764753	0.0769619	0.0791387	0.0512509	0.0513774	0.0485583	0.04993	0.0589422	0.028856	0.0308488	0.0303604	0.0317773
278	0.0834902	0.0785425	0.0811798	0.0790228	0.0832705	0.0766928	0.08046	0.0780149	0.0774971	0.0755811	0.0761078	0.0764393	0.0786044	0.0511323	0.0513208	0.0486723	0.0498991	0.0588509	0.0287325	0.0306359	0.030204	0.0316763
277	0.082955	0.0779294	0.0806491	0.0785381	0.0827093	0.0761973	0.0798937	0.077361	0.0768142	0.0749913	0.0754436	0.0757994	0.0779847	0.0510074	0.0511325	0.0487586	0.0497715	0.058661	0.0282899	0.0301135	0.0298756	0.0312634
276	0.0822948	0.0772593	0.0800145	0.0779297	0.0820886	0.0755794	0.0792747	0.0766856	0.0761196	0.0743656	0.0747102	0.0751304	0.0773118	0.0508704	0.050881	0.0483235	0.0495274	0.0585581	0.0280784	0.029986	0.0296606	0.0310594
275	0.081221	0.0762037	0.0790657	0.0768938	0.0810438	0.0744256	0.0782264	0.0757302	0.0751763	0.0732802	0.0737292	0.0741315	0.0762965	0.0504538	0.0504339	0.0477785	0.0491292	0.0582659	0.0276127	0.0297031	0.029213	0.0307439
274	0.0798132	0.0749068	0.0777576	0.075471	0.0796151	0.0730561	0.0768775	0.0745192	0.0738694	0.07194	0.0724673	0.0728663	0.0749499	0.0497973	0.049734	0.0472848	0.0485696	0.0578163	0.027231	0.0293998	0.0289531	0.030175
273	0.0783213	0.0734843	0.0762094	0.0741575	0.0779866	0.0715723	0.0754169	0.073021	0.0725076	0.0705212	0.0708691	0.0714396	0.0735041	0.0490201	0.0490689	0.046625	0.047915	0.0571449	0.0266836	0.0288038	0.0284574	0.0300207
272	0.0767387	0.0719571	0.0745899	0.0726893	0.0763585	0.0699674	0.0737651	0.0714109	0.0710071	0.0689618	0.0692161	0.0698094	0.0719848	0.0481632	0.04826	0.0458695	0.0472401	0.0566208	0.0257536	0.0278529	0.0277118	0.0294388
271	0.0751178	0.0703287	0.0730092	0.070921	0.0747572	0.068244	0.0720547	0.0698581	0.069353	0.0673044	0.0676007	0.0681948	0.0704202	0.0474388	0.0474903	0.0450469	0.0463408	0.0562049	0.0250341	0.0273308	0.0271389	0.0289166
270	0.0734016	0.0687018	0.0713502	0.0693262	0.0729681	0.0665911	0.0703981	0.0681769	0.0677508	0.0655699	0.0660497	0.0665266	0.068724	0.0465634	0.046608	0.044245	0.0456689	0.0556453	0.0246444	0.0267495	0.0265792	0.0286452
269	0.0716021	0.0669756	0.0695648	0.0676724	0.0711081	0.0647327	0.0685985	0.0664218	0.0659572	0.063736	0.0644601	0.0647602	0.0669421	0.0457097	0.0455415	0.0435202	0.0448561	0.0551771	0.0243477	0.0262857	0.0262841	0.0285797
268	0.0698393	0.0650792	0.067819	0.0658287	0.0692509	0.0627788	0.0667987	0.0646467	0.0641519	0.0618766	0.0624427	0.0629786	0.065295	0.0445353	0.04445	0.0423746	0.0438338	0.0543785	0.0236086	0.0255767	0.0256865	0.028225
267	0.067878	0.0632053	0.0659183	0.063871	0.0671528	0.0607776	0.0649	0.0628836	0.0623404	0.0600879	0.0606557	0.0611252	0.0636406	0.0434313	0.04332	0.0415889	0.0430696	0.0538421	0.0228155	0.0250018	0.0250084	0.027709
266	0.0661896	0.0615369	0.0641844	0.0623791	0.065472	0.0591974	0.0631927	0.0613039	0.0605865	0.0584346	0.0589565	0.0594707	0.0621387	0.0425179	0.0424332	0.0406966	0.0421639	0.0536654	0.0221167	0.0243756	0.0245186	0.0278271
265	0.0643223	0.0598077	0.0624743	0.0607765	0.0635941	0.0573705	0.0615135	0.0595314	0.0591616	0.0567017	0.0572127	0.0578029	0.0605516	0.0414136	0.0415153	0.0395682	0.0410428	0.0535094	0.0212987	0.0238149	0.0239252	0.0278828
264	0.0624476	0.0580565	0.0607497	0.0591437	0.0616204	0.0555581	0.0598022	0.0577625	0.0575153	0.0549462	0.0554895	0.0561162	0.058998	0.0402508	0.0401355	0.0384594	0.040044	0.0532309	0.0205302	0.0234513	0.0237847	0.0281153
263	0.0607097	0.0561904	0.0589664	0.0574245	0.0598511	0.0537618	0.0579952	0.0560734	0.0557859	0.0531511	0.0537596	0.0544294	0.0575085	0.0391854	0.0388575	0.0374946	0.0391304	0.0529733	0.0198541	0.0229487	0.023371	0.0283591
262	0.059051	0.054551	0.0573367	0.05576	0.0581406	0.0520101	0.0563394	0.0545189	0.0542359	0.0514287	0.0521224	0.0527971	0.0561475	0.0382552	0.0378165	0.036501	0.0383135	0.0533825	0.0193931	0.0225469	0.0230497	0.0287503
261	0.0575009	0.0531985	0.0561158	0.0545488	0.0566212	0.0506439	0.0550704	0.0533192	0.0530283	0.0500884	0.0508502	0.0515609	0.0552001	0.0374562	0.0371173	0.0357121	0.0376681	0.053814	0.0189323	0.0223693	0.0228648	0.0293931
260	0.0561442	0.0519116	0.0550281	0.0536736	0.0552658	0.0494576	0.0538552	0.0522476	0.0519871	0.0488	0.0495793	0.0505947	0.0543793	0.0366327	0.0361951	0.0351126	0.0367662	0.0546815	0.0184955	0.0222865	0.0228359	0.0301653
259	0.0544877	0.0504759	0.0535466	0.0523268	0.0535095	0.0478897	0.0523454	0.0508716	0.0507905	0.0473274	0.0481455	0.0492758	0.0533463	0.0356023	0.0350982	0.034009	0.0358689	0.0556528	0.0180616	0.0218701	0.0229297	0.0310929
258	0.052857	0.0491548	0.0523182	0.0509879	0.0517585	0.0464074	0.0508457	0.0495411	0.0495768	0.0459201	0.0467868	0.0480285	0.0523855	0.0343989	0.0339672	0.0326886	0.0350305	0.0565056	0.0174542	0.0213436	0.0227765	0.0317744
257	0.0514494	0.047882	0.0510047	0.0499288	0.0503491	0.0452546	0.0496294	0.0484479	0.0485839	0.0445951	0.0456974	0.0469978	0.0516589	0.0331125	0.0328948	0.0316086	0.0341436	0.0575942	0.0168157	0.0210138	0.0228198	0.0328024
256	0.0501699	0.046778	0.0498941	0.0491665	0.0490887	0.0442008	0.0486994	0.0476997	0.0478831	0.0435323	0.0445811	0.0461629	0.0511693	0.0321895	0.0318325	0.03061	0.0332905	0.0589667	0.0163112	0.0209814	0.0229641	0.0343444
255	0.0493282	0.0460765	0.0493316	0.0487246	0.0481322	0.0433946	0.0480219	0.0472912	0.0477198	0.0428325	0.0438172	0.0456697	0.0511131	0.0313264	0.0309579	0.0299306	0.0329474	0.0609169	0.0160292	0.0210337	0.0233444	0.0359247
254	0.048604	0.0454625	0.0488611	0.0486461	0.0472469	0.0427918	0.0474976	0.0470367	0.0475907	0.0423447	0.0433052	0.0456084	0.0513415	0.0307852	0.0301859	0.0293392	0.0325629	0.0632357	0.0158434	0.0211366	0.0240359	0.0377867
253	0.0478166	0.0452541	0.0485313	0.0486224	0.0465714	0.0424343	0.0472212	0.0471084	0.0477186	0.0420831	0.042972	0.0457317	0.0518187	0.0300424	0.0293854	0.028745	0.0321049	0.0654534	0.0152598	0.0211119	0.0244783	0.0395261
252	0.0472905	0.045171	0.0484477	0.0489583	0.0460092	0.0422451	0.0471084	0.0474755	0.0481834	0.041673	0.0428953	0.045934	0.0526266	0.029235	0.0288017	0.0281719	0.0318421	0.0678718	0.0150207	0.0212475	0.025104	0.0411749
251	0.0467067	0.0448457	0.0484351	0.0494168	0.0454441	0.0419478	0.0471588	0.0479097	0.0488056	0.0414454	0.0428078	0.0461664	0.0536281	0.0286122	0.0282456	0.0277804	0.0315801	0.0702804	0.014623	0.0216728	0.0258188	0.043045
250	0.0464709	0.0448042	0.0487741	0.0503667	0.0452584	0.0420589	0.047444	0.04874	0.0498157	0.0416585	0.0429979	0.0470329	0.0549885	0.0281976	0.0276157	0.0275459	0.0313269	0.0729035	0.0141375	0.0222953	0.0267212	0.0451291
