# Supplementary material for: Coral anthozoan-specific opsins employ a novel chloride counterion for spectral tuning
Source: eLife. 2025 Sep 1;14:RP105451. doi: 10.7554/eLife.105451 (PMC12401545; doi:10.7554/eLife.105451)
Supplement: Figure 3—figure supplement 2—source data 1. [file elife-105451-fig3-figsupp2-data1.xlsx]

## Sheet: Sheet1
wavelength [nm]	A_abs_Antho2a_WT_dark_0Cl_pH4_9	A_abs_Antho2a_WT_dark_0Cl_pH5_7	A_abs_Antho2a_WT_dark_0Cl_pH6_5	B_abs_Antho2a_E292A_dark_0Cl_pH6_5	B_abs_Antho2a_E292A_dark_0Cl_pH5_3	B_abs_Antho2a_E292A_dark_0Cl_pH4_7
750	-4.90018e-05	0.000460676	0.00033931	-0.00150207	-0.00205392	-0.00301457
749	-9.41428e-05	0.000374888	0.000387797	-0.0016015	-0.00219884	-0.00302484
748	-8.43823e-05	0.000385975	0.000289496	-0.00157849	-0.00219734	-0.00300821
747	-2.34414e-05	0.000395003	0.000209549	-0.00144079	-0.00209878	-0.00292642
746	0.000209589	0.000450578	0.000356574	-0.00133615	-0.00193504	-0.00283059
745	0.00013966	0.000498273	0.000333786	-0.0014304	-0.00210115	-0.00286732
744	-1.95016e-05	0.000468952	0.000193314	-0.00166828	-0.00209045	-0.00297386
743	-7.02839e-06	0.000514866	0.000207728	-0.00166117	-0.00205708	-0.00307973
742	0.000134512	0.000607839	0.00025667	-0.00149029	-0.00210751	-0.00295761
741	0.000116198	0.000567766	0.000221092	-0.00149779	-0.00199016	-0.00292438
740	0.000103171	0.000405101	0.000227388	-0.00148546	-0.00212495	-0.00291163
739	6.92937e-06	0.000418208	0.000274865	-0.00134672	-0.0020435	-0.00264144
738	6.71374e-05	0.000450301	0.000330836	-0.0014595	-0.00207908	-0.00268379
737	-1.59382e-05	0.000433274	0.000286902	-0.00157979	-0.00221015	-0.00294159
736	-8.21446e-05	0.000308483	0.000178941	-0.00155	-0.00216206	-0.00309822
735	-0.00017698	0.000312086	0.000178326	-0.00168807	-0.00217356	-0.00309956
734	-0.000129879	0.000276231	0.000256314	-0.00163238	-0.00210506	-0.00305189
733	-5.53372e-05	0.00044846	0.000236238	-0.00162921	-0.00209874	-0.00304959
732	2.60747e-05	0.000569529	0.000194403	-0.00157855	-0.00217687	-0.00310697
731	-7.16313e-05	0.000496016	0.000210143	-0.0014953	-0.00213097	-0.00294707
730	-9.39248e-05	0.000403992	0.000260491	-0.00146627	-0.00199505	-0.00286659
729	-0.000111902	0.000410288	0.000268153	-0.00149334	-0.00202424	-0.00290071
728	-2.59167e-05	0.000462042	0.000366117	-0.00137611	-0.00206712	-0.00293428
727	7.09189e-05	0.000624786	0.000424404	-0.00152166	-0.00211422	-0.00305701
726	0.00011406	0.000537773	0.00036776	-0.00157938	-0.00217758	-0.00299411
725	3.27469e-05	0.000469862	0.000334598	-0.0015852	-0.0023265	-0.00300191
724	1.58387e-05	0.000486829	0.00021834	-0.00144192	-0.00211529	-0.00290698
723	-0.000168704	0.000314087	6.57123e-05	-0.00140464	-0.00201386	-0.00276413
722	-0.000177079	0.000340498	9.22225e-05	-0.00155031	-0.00206146	-0.0027222
721	-9.29944e-05	0.000461072	0.000148411	-0.00136155	-0.00182136	-0.00266158
720	0.000143343	0.000625698	0.00029409	-0.00135401	-0.00195187	-0.00273968
719	0.000106675	0.000485919	0.0002498	-0.00143327	-0.00203386	-0.00287473
718	2.77001e-07	0.00055656	0.000357188	-0.00141131	-0.00178921	-0.00273786
717	-0.000132136	0.000378274	0.000292288	-0.00145934	-0.00207779	-0.00289332
716	-3.79933e-05	0.000425929	0.000256472	-0.00148973	-0.00209179	-0.00283319
715	4.1617e-05	0.000395439	0.000217766	-0.00131473	-0.00205021	-0.00272701
714	6.4623e-05	0.000514369	0.000282745	-0.00148357	-0.00216778	-0.00285944
713	-7.40865e-05	0.000594396	0.000350516	-0.0014945	-0.00216857	-0.00273131
712	-2.99556e-05	0.000490393	0.000181455	-0.00138589	-0.00205767	-0.00280052
711	-9.77461e-05	0.000460319	0.000191315	-0.00127028	-0.00198409	-0.00281418
710	-4.62695e-05	0.000498511	0.000205272	-0.00135983	-0.00199309	-0.00267144
709	0.000100914	0.00065397	0.000335706	-0.00132378	-0.00187371	-0.0026813
708	2.92823e-05	0.00047992	0.000264035	-0.00121566	-0.00193639	-0.00239461
707	1.34827e-05	0.000355544	0.000345526	-0.00135395	-0.001967	-0.00250704
706	-2.35801e-05	0.00047105	0.000358811	-0.00132465	-0.00195649	-0.00257753
705	9.78845e-05	0.000472713	0.00036683	-0.00131788	-0.00201008	-0.00243441
704	4.07455e-05	0.000396547	0.000265738	-0.00120515	-0.00186587	-0.002474
703	-0.000171357	0.000411634	9.78851e-05	-0.00122793	-0.00188105	-0.00249332
702	-0.000101844	0.000355862	0.000165715	-0.00139295	-0.00191914	-0.00254474
701	-4.95166e-05	0.000372631	0.000258392	-0.00126995	-0.0020238	-0.00268288
700	0.000114536	0.000686124	0.000430305	-0.00125823	-0.00204154	-0.00268601
699	6.6662e-05	0.000704358	0.000407278	-0.00137015	-0.00204374	-0.00273459
698	-5.99898e-05	0.000514647	0.000309137	-0.0012295	-0.00192417	-0.00258654
697	5.27239e-05	0.000517042	0.000375799	-0.000960059	-0.00177798	-0.00257615
696	0.00015635	0.000587922	0.000332004	-0.000997516	-0.00158591	-0.00247634
695	0.000119881	0.000563728	0.000345348	-0.00109409	-0.00157043	-0.00240911
694	0.000103943	0.00069727	0.000329945	-0.00111583	-0.00180061	-0.00245169
693	5.31397e-05	0.000707882	0.000382154	-0.00116937	-0.00189305	-0.00243767
692	4.75367e-05	0.000690261	0.000347942	-0.0011153	-0.00168368	-0.00250305
691	5.23279e-05	0.00060683	0.000283794	-0.00125633	-0.00174434	-0.00260947
690	0.000161498	0.000628331	0.000445371	-0.00132552	-0.00191215	-0.00255829
689	0.00013968	0.000666285	0.000484038	-0.00134271	-0.00178819	-0.00255959
688	0.000179416	0.000733719	0.000395103	-0.00146514	-0.00205526	-0.00283195
687	2.11253e-05	0.000607542	0.000260254	-0.00144732	-0.00226627	-0.00284259
686	1.00776e-05	0.000512093	0.000334123	-0.00138052	-0.00222145	-0.00286089
685	-1.83732e-05	0.000418069	0.0003147	-0.00159471	-0.00247048	-0.00313358
684	9.127e-06	0.000487859	0.000374512	-0.00165899	-0.00252311	-0.00327142
683	1.35426e-05	0.000416861	0.000162686	-0.00132599	-0.00203338	-0.0029757
682	-0.000155083	0.000316363	0.000112813	-0.00121853	-0.00180289	-0.00273269
681	-7.8086e-05	0.000526605	0.000206183	-0.0011602	-0.00179548	-0.00251364
680	-8.11547e-05	0.000441867	0.000173931	-0.00110396	-0.00183906	-0.00271399
679	-0.000145778	0.000263896	2.41346e-05	-0.00153323	-0.00207409	-0.00298899
678	-6.11774e-06	0.00033339	0.000158765	-0.00143443	-0.00192223	-0.00273552
677	0.000134829	0.000432324	0.000399993	-0.0011622	-0.00159193	-0.00243757
676	0.000237247	0.000513993	0.00039831	-0.000952374	-0.00156233	-0.00237865
675	0.000120435	0.000499224	0.000333826	-0.00100122	-0.00165816	-0.00248727
674	4.67647e-05	0.000560283	0.000365068	-0.0011701	-0.00190606	-0.00259143
673	0.000125543	0.000615838	0.00033234	-0.00110928	-0.00179637	-0.00267716
672	9.89142e-05	0.000622054	0.000317471	-0.00102446	-0.00172508	-0.00257901
671	0.000206184	0.000602058	0.0003186	-0.00109241	-0.0018373	-0.00244393
670	0.000272291	0.000559629	0.000209648	-0.00128234	-0.00186171	-0.00252522
669	0.000125464	0.000520883	0.000302405	-0.00120435	-0.00186632	-0.00257028
668	1.06913e-05	0.000499936	0.000167992	-0.00111575	-0.0017384	-0.00248954
667	0.000126276	0.000570994	0.000296247	-0.000943941	-0.00158381	-0.00241825
666	0.000103567	0.000508687	0.000324936	-0.00120328	-0.00185435	-0.00250093
665	4.26068e-05	0.00052516	0.000368275	-0.00101017	-0.00168527	-0.00229617
664	0.000147797	0.000554778	0.000249523	-0.00111254	-0.00157871	-0.00244949
663	0.000109011	0.000553631	0.000207431	-0.00118103	-0.00169439	-0.00256506
662	8.2364e-06	0.000405438	0.000247345	-0.00105549	-0.00164569	-0.00246765
661	9.9132e-05	0.000639398	0.000348873	-0.0010187	-0.00164717	-0.00236527
660	0.000124197	0.000679154	0.000281775	-0.00107517	-0.00172351	-0.0024981
659	4.41114e-05	0.000667215	0.000395122	-0.00120806	-0.00170712	-0.00241482
658	0.000102181	0.000701764	0.000440343	-0.00130798	-0.00184444	-0.00241334
657	0.000153281	0.000611482	0.000415079	-0.00104373	-0.00179471	-0.00227851
656	4.05676e-05	0.000560976	0.000405913	-0.000920698	-0.00177533	-0.00231926
655	7.68584e-05	0.000527852	0.000358831	-0.000970036	-0.00168323	-0.00234579
654	0.000119129	0.000510509	0.000355861	-0.00109489	-0.00178956	-0.00235662
653	6.57909e-05	0.000420484	0.000325253	-0.00112999	-0.00174828	-0.00235404
652	2.29861e-05	0.000509974	0.000324758	-0.00113247	-0.00175864	-0.0024878
651	6.44249e-05	0.000664562	0.000420959	-0.00122029	-0.00185587	-0.00253928
650	9.58652e-05	0.00069331	0.000372651	-0.00110643	-0.00163394	-0.00239756
649	5.94755e-05	0.000705547	0.000379521	-0.00120869	-0.00180206	-0.00243706
648	0.000254849	0.000742966	0.000435353	-0.00119511	-0.00166914	-0.0023114
647	0.000257937	0.000720532	0.00044252	-0.00105034	-0.00153604	-0.00217291
646	0.000158568	0.000685311	0.000421415	-0.00107414	-0.00150223	-0.00235784
645	0.000164646	0.00071186	0.00033632	-0.00088302	-0.00142111	-0.0021831
644	0.000247008	0.00092444	0.000495997	-0.000857422	-0.00153622	-0.00206795
643	0.000175456	0.000782563	0.000437155	-0.00111459	-0.00164309	-0.00227512
642	0.000140788	0.000749856	0.000429631	-0.00105084	-0.0015128	-0.00231096
641	0.000170447	0.000685568	0.000440125	-0.00105246	-0.00152024	-0.00225273
640	0.000145461	0.000494274	0.000332558	-0.000977303	-0.00140699	-0.00220484
639	0.000156489	0.000595603	0.000471505	-0.00101326	-0.00151527	-0.00235204
638	0.000160369	0.00065599	0.000492749	-0.00121425	-0.00160031	-0.00242936
637	0.000137898	0.000580894	0.000373047	-0.0012135	-0.00174551	-0.00237727
636	0.000161518	0.0005134	0.000271163	-0.000855462	-0.00173868	-0.00213212
635	0.000231328	0.000567449	0.00037659	-0.000840335	-0.00167081	-0.00215611
634	8.80247e-05	0.000588674	0.000466496	-0.000977461	-0.00159009	-0.00228926
633	0.00017114	0.000674878	0.000534643	-0.000987714	-0.0015573	-0.00229625
632	0.000186504	0.000733303	0.000485523	-0.000761813	-0.00136253	-0.00202095
631	0.00010424	0.000629341	0.000317769	-0.000736075	-0.00151493	-0.00203152
630	0.000160706	0.000552997	0.000306523	-0.000946099	-0.00151383	-0.00217092
629	0.000193809	0.000660107	0.00037465	-0.000815229	-0.00153358	-0.00225235
628	0.000267975	0.0007061	0.000415891	-0.000735996	-0.00147655	-0.00215984
627	0.000254928	0.00074346	0.000514389	-0.000721938	-0.00148775	-0.00203235
626	0.000143362	0.000606513	0.000396429	-0.00095206	-0.00157782	-0.00193938
625	0.000140709	0.000745083	0.000433789	-0.00112474	-0.00153682	-0.00217087
624	4.2627e-05	0.000660147	0.000438224	-0.000881022	-0.00137595	-0.00219522
623	0.000136037	0.00067173	0.000589763	-0.000806299	-0.00145326	-0.00221066
622	-3.28064e-05	0.000622866	0.000461111	-0.000604037	-0.00128307	-0.00213572
621	9.87955e-05	0.000731322	0.000557432	-0.000743162	-0.00136181	-0.00223404
620	0.000355149	0.000867222	0.000561253	-0.000870586	-0.00163252	-0.00211452
619	0.000373363	0.000943981	0.000485662	-0.000942439	-0.00166972	-0.00233592
618	0.000291575	0.000767298	0.000443669	-0.000835264	-0.00165066	-0.00211062
617	0.000137106	0.000552838	0.000343864	-0.000975578	-0.0016803	-0.00233426
616	0.000127206	0.000573746	0.000312799	-0.000933569	-0.00149799	-0.0022499
615	0.000215489	0.000756904	0.000459112	-0.000938377	-0.00126852	-0.00216088
614	0.000328638	0.000851878	0.000514092	-0.000919867	-0.00154737	-0.00233462
613	0.000246078	0.000807509	0.000370176	-0.000971204	-0.00164026	-0.00216245
612	0.000258848	0.00074542	0.000447192	-0.00102215	-0.00160613	-0.0020691
611	0.000325213	0.000790621	0.00055276	-0.00105842	-0.00158352	-0.00220157
610	0.000345012	0.000858946	0.000582576	-0.000755617	-0.00138205	-0.00196048
609	0.000336419	0.000784087	0.000531852	-0.000717305	-0.00137504	-0.00204344
608	0.000292605	0.000764763	0.000486988	-0.000917113	-0.00141776	-0.00210642
607	0.00023008	0.000776248	0.000302583	-0.000635579	-0.00124918	-0.00212234
606	0.000181396	0.000662424	0.000256215	-0.000811012	-0.00152473	-0.00219591
605	0.000312304	0.000808499	0.000462081	-0.000921569	-0.00154947	-0.00224218
604	0.000256472	0.000694675	0.000348239	-0.000914104	-0.00143513	-0.00206314
603	0.000357445	0.000675155	0.000452281	-0.000778977	-0.00131732	-0.00212038
602	0.000391994	0.000775969	0.000389301	-0.000782106	-0.00128256	-0.00214735
601	0.000296346	0.000814834	0.000391994	-0.000823782	-0.00137878	-0.00188971
600	0.000269697	0.000788522	0.000432502	-0.000714137	-0.00149057	-0.00206748
599	0.000235268	0.000712276	0.00055858	-0.000756883	-0.00125642	-0.00207177
598	0.000222518	0.000642804	0.000465546	-0.000833683	-0.00130293	-0.00201083
597	0.000333588	0.000779889	0.000492017	-0.000910937	-0.00129749	-0.0020319
596	0.000339052	0.000763099	0.000431334	-0.000799768	-0.00122293	-0.00191782
595	0.000331509	0.000739065	0.000447886	-0.000764643	-0.00115707	-0.00193954
594	0.000217706	0.000732789	0.000463527	-0.00068927	-0.00128959	-0.00197106
593	0.000314621	0.000756449	0.000434026	-0.000828774	-0.00151119	-0.00199483
592	0.000366711	0.000718613	0.000489265	-0.000998111	-0.00148868	-0.00198204
591	0.000480534	0.000815984	0.000555789	-0.00105622	-0.00148587	-0.0020595
590	0.000503441	0.000940495	0.000558065	-0.000951008	-0.00131477	-0.00207266
589	0.000520666	0.000948554	0.000454083	-0.000792383	-0.00140121	-0.00204901
588	0.000555076	0.000865102	0.000454578	-0.000800046	-0.00142287	-0.00200042
587	0.000487027	0.000910106	0.000477326	-0.000857619	-0.00132217	-0.00207333
586	0.000355208	0.000872944	0.000482454	-0.000907629	-0.00129679	-0.00195494
585	0.000568163	0.000976293	0.000531317	-0.000954612	-0.00139082	-0.0019276
584	0.000539079	0.000868053	0.000439135	-0.000803369	-0.0012682	-0.00194954
583	0.000442085	0.000780879	0.000535732	-0.000513976	-0.0011228	-0.00200347
582	0.00044149	0.000849166	0.000561253	-0.00054589	-0.00119333	-0.00198599
581	0.000527556	0.000950416	0.000567014	-0.000645418	-0.00116185	-0.00180372
580	0.000612591	0.00113039	0.000672343	-0.000743814	-0.00116163	-0.00178531
579	0.000628271	0.00114405	0.000725879	-0.000793095	-0.00122845	-0.0017367
578	0.000576478	0.00110896	0.000619422	-0.000750115	-0.00119699	-0.00178002
577	0.0005527	0.00102553	0.000530981	-0.000629542	-0.00120873	-0.00191045
576	0.000736827	0.00106539	0.00066874	-0.000560183	-0.00111512	-0.00189054
575	0.000655356	0.00103345	0.000575132	-0.000657296	-0.00121823	-0.00177703
574	0.000745677	0.00114043	0.000615145	-0.000680698	-0.00115802	-0.00174775
573	0.000793768	0.00116262	0.000623895	-0.000512212	-0.00115844	-0.0016341
572	0.000792501	0.00116913	0.000733956	-0.000543511	-0.00127013	-0.00162801
571	0.0007238	0.00102797	0.000666958	-0.000624096	-0.00136848	-0.00191267
570	0.000813408	0.00108683	0.000689291	-0.000704674	-0.00145876	-0.00195884
569	0.000748271	0.00109324	0.000624827	-0.000746351	-0.0014797	-0.00192869
568	0.000781591	0.00116131	0.000762605	-0.000637497	-0.00130659	-0.00190483
567	0.000933863	0.00123082	0.000839068	-0.000719285	-0.00131331	-0.00202394
566	0.000906641	0.00131269	0.00072677	-0.000740926	-0.00145691	-0.00198751
565	0.000969818	0.00141307	0.000732611	-0.000603444	-0.00136668	-0.00180035
564	0.00101594	0.00140221	0.000666563	-0.000487365	-0.0013333	-0.00168203
563	0.00105545	0.00139569	0.000695369	-0.000518329	-0.00129068	-0.0016877
562	0.00111057	0.00142939	0.00079072	-0.000757419	-0.00122881	-0.00184197
561	0.00114308	0.00140478	0.000862608	-0.000626115	-0.00110166	-0.00175506
560	0.00113518	0.00153191	0.00080729	-0.000741737	-0.00124071	-0.00179881
559	0.00114171	0.00151076	0.000817923	-0.000795887	-0.00132083	-0.00192063
558	0.0011746	0.00149385	0.000742351	-0.000568577	-0.00109833	-0.00174064
557	0.00126351	0.00162672	0.000892206	-0.000549512	-0.00103248	-0.00155344
556	0.00132101	0.00160562	0.000851778	-0.000475525	-0.00114466	-0.00166863
555	0.00139543	0.00164739	0.000814419	-0.000637319	-0.00104509	-0.00169421
554	0.00141978	0.00174018	0.000906957	-0.00031862	-0.000969067	-0.00156453
553	0.00139401	0.00176173	0.000861461	-0.000316383	-0.00111684	-0.00152269
552	0.0014849	0.00191693	0.000879081	-0.000504212	-0.00119368	-0.00160137
551	0.00158813	0.00194104	0.000924856	-0.000477226	-0.00104607	-0.00168657
550	0.0016975	0.00190703	0.000909552	-0.000591307	-0.00120342	-0.0017479
549	0.00179358	0.00185899	0.000948276	-0.000598296	-0.00119071	-0.00169201
548	0.00165262	0.00186587	0.000933134	-0.000561114	-0.0011724	-0.00177038
547	0.00173149	0.0018781	0.00101751	-0.000647951	-0.00126999	-0.00185496
546	0.0019666	0.00206862	0.00118935	-0.000609681	-0.0010736	-0.00172653
545	0.00172512	0.00195563	0.00108093	-0.000605542	-0.00129971	-0.00172516
544	0.00172555	0.00196607	0.00106758	-0.000639636	-0.00126595	-0.001497
543	0.00194201	0.00203119	0.00115286	-0.000541811	-0.00116175	-0.00162207
542	0.00203802	0.00204641	0.00104701	-0.000393578	-0.00116008	-0.00160993
541	0.00210092	0.00215792	0.000961284	-0.000497561	-0.00109702	-0.00151228
540	0.00201865	0.00212537	0.000909591	-0.000485642	-0.000933031	-0.00149597
539	0.00214717	0.00223052	0.0010282	-0.000326639	-0.000872746	-0.00143463
538	0.00233397	0.00240605	0.00114579	-0.00030585	-0.000944438	-0.00135213
537	0.00230207	0.00238089	0.00117125	-0.00025582	-0.000759993	-0.00110758
536	0.00238059	0.00248573	0.00119507	-0.00038057	-0.000790701	-0.00126139
535	0.00227176	0.00245654	0.00111582	-0.000303989	-0.00087134	-0.00131067
534	0.00252265	0.00236818	0.00122956	-0.000393618	-0.00102627	-0.0012748
533	0.00254423	0.00240912	0.00126209	-0.000386292	-0.000814556	-0.00143816
532	0.0024748	0.00237842	0.00113102	-0.000332578	-0.000790484	-0.00133726
531	0.00280165	0.00256668	0.00127397	-0.000468793	-0.000922778	-0.0010662
530	0.00283923	0.00272247	0.00131214	-0.000497342	-0.00077686	-0.0011718
529	0.00271525	0.00263399	0.00122793	-0.000405517	-0.000773614	-0.00133516
528	0.00299085	0.00279046	0.00135866	-0.00037063	-0.000611762	-0.00117044
527	0.00311859	0.00289443	0.00142002	-0.000252928	-0.000718335	-0.0011838
526	0.00312098	0.00293187	0.00145526	-0.000325411	-0.000918261	-0.00116281
525	0.00320586	0.00295145	0.00141214	-0.000240059	-0.000851422	-0.000885178
524	0.00328266	0.0027971	0.00135049	-0.000304919	-0.000968671	-0.00101569
523	0.00335326	0.00280832	0.00136066	-0.000368652	-0.000971741	-0.00114349
522	0.0034086	0.00296	0.00144501	-0.000260789	-0.000784661	-0.00129735
521	0.00351516	0.00306333	0.00153713	-0.000174703	-0.000693764	-0.00112922
520	0.0034854	0.00295707	0.00147098	-0.000265916	-0.00088579	-0.00106246
519	0.00351888	0.00300536	0.00151351	-0.000124534	-0.000862929	-0.00107135
518	0.00361334	0.0029502	0.00142297	-0.000289971	-0.000870827	-0.00116581
517	0.00368022	0.00294705	0.00138393	-0.000459705	-0.000873576	-0.00109756
516	0.00367024	0.00299897	0.00147983	-0.000615005	-0.000775931	-0.00108023
515	0.00382039	0.00307507	0.00153038	-0.000371383	-0.000605663	-0.00100599
514	0.00377545	0.00304335	0.00151656	-0.00036293	-0.000708872	-0.000952417
513	0.00388715	0.00316296	0.00155251	-0.000331707	-0.000683371	-0.00103533
512	0.00397334	0.00315999	0.0015696	-0.000303375	-0.000685133	-0.00104256
511	0.00393544	0.00315359	0.00153582	-0.000409674	-0.000895455	-0.00113535
510	0.00411769	0.00324902	0.00162605	-0.000392984	-0.000725027	-0.00115816
509	0.00412652	0.00329179	0.00149367	-0.000320342	-0.000817746	-0.00116636
508	0.00423836	0.00335249	0.00152028	-0.000391083	-0.000692499	-0.00108416
507	0.00430758	0.00337013	0.00157152	-0.000394706	-0.00078262	-0.00110488
506	0.00432217	0.00334212	0.00169382	-0.000265956	-0.000743181	-0.00106594
505	0.00427056	0.00326518	0.00165153	-0.000231209	-0.000660701	-0.00101252
504	0.004323	0.00334713	0.00160189	-0.000135918	-0.000563468	-0.000792581
503	0.00433928	0.00333253	0.00163715	-0.000151618	-0.000619044	-0.000889891
502	0.00455993	0.00350644	0.00174373	-0.000170664	-0.000618233	-0.000823623
501	0.00457415	0.00351609	0.00181675	-0.000263441	-0.000479959	-0.000976847
500	0.00453861	0.00345115	0.00163588	1.22162e-05	-0.000310879	-0.000808935
499	0.00471088	0.00346493	0.00162599	6.18709e-05	-0.000557313	-0.000845265
498	0.00476506	0.00354113	0.0016739	-0.000122376	-0.000650406	-0.000994112
497	0.0046673	0.00337991	0.00158585	-0.000221468	-0.000621342	-0.000997694
496	0.00478305	0.00351621	0.00164058	-0.000189038	-0.000771594	-0.000925014
495	0.00499509	0.00360565	0.0018881	-0.000298168	-0.000652169	-0.000769812
494	0.00484917	0.00358416	0.00172278	-0.000345902	-0.000418999	-0.000825685
493	0.00482335	0.00347851	0.00170576	-0.000231249	-0.00035899	-0.000646249
492	0.00501954	0.0035544	0.00182007	-7.96107e-05	-0.000277756	-0.000523141
491	0.00504253	0.00359592	0.00182268	-5.13773e-05	-0.000443035	-0.00072578
490	0.0049783	0.00367859	0.00183539	-0.000148768	-0.000476079	-0.000825089
489	0.00496735	0.00352864	0.00180564	-0.0002104	-0.000601426	-0.000813509
488	0.00512958	0.00363426	0.00190705	-7.26611e-05	-0.000434739	-0.000620094
487	0.00515102	0.00366226	0.00188351	5.95343e-05	-0.00034026	-0.000553216
486	0.00523117	0.00365331	0.00179816	-0.000107606	-0.000472159	-0.000578714
485	0.00517595	0.00373215	0.00175863	-2.53817e-05	-0.000445925	-0.000604097
484	0.00506373	0.00366755	0.00179968	2.5085e-05	-0.000542226	-0.000643278
483	0.00510165	0.00360679	0.00180281	-0.000142491	-0.000485523	-0.000782425
482	0.00534451	0.00368822	0.00200014	-7.33343e-05	-0.000405497	-0.000730787
481	0.00542747	0.00380655	0.00212206	0.000135225	-0.000300623	-0.000629062
480	0.00533032	0.00375088	0.00187169	0.000303316	-0.000328302	-0.000505876
479	0.00533307	0.0038261	0.00191754	6.84242e-05	-0.000376472	-0.000566737
478	0.00538577	0.00385884	0.0019608	7.95114e-05	-0.000185454	-0.00066785
477	0.00542357	0.00370429	0.00185133	-4.4983e-05	-0.000320977	-0.000848989
476	0.00546602	0.00369986	0.00196118	-4.46856e-05	-0.00052617	-0.000729957
475	0.00547869	0.00371075	0.00200842	0.000195572	-0.000369918	-0.00051532
474	0.00562694	0.00381564	0.00208084	0.000141402	-0.000428661	-0.000682639
473	0.00563961	0.00397138	0.00211199	-2.86686e-05	-0.000322025	-0.000578913
472	0.00548382	0.00387634	0.00203665	-2.00362e-05	-0.000371661	-0.000675254
471	0.00547101	0.00382295	0.00190119	3.52022e-05	-0.000491126	-0.000607799
470	0.00556679	0.00383423	0.00198597	0.000273875	-0.000227744	-0.00047994
469	0.00544778	0.00374946	0.00206427	0.000412427	-0.000111011	-0.000455091
468	0.00553597	0.00386351	0.00213756	0.00023503	-0.000285873	-0.000543752
467	0.00562835	0.00388792	0.00225858	0.000317571	-0.000236039	-0.000476217
466	0.00562166	0.00381067	0.00225004	0.000375066	-9.16683e-05	-0.000307949
465	0.00552793	0.00385185	0.00222288	0.000390628	-8.63617e-05	-0.000388906
464	0.00556836	0.0039575	0.00222877	0.000199115	1.34434e-05	-0.000466873
463	0.00562797	0.00400727	0.00228526	0.000105012	-4.43503e-06	-0.000448519
462	0.00549872	0.00385013	0.00223109	0.000185712	-9.246e-05	-0.000547313
461	0.00550609	0.00382314	0.00218063	0.000114496	-0.000158053	-0.000505262
460	0.00557016	0.00381047	0.00221006	0.000237267	-0.000105388	-0.000422385
459	0.00540425	0.00377286	0.00209628	0.000387084	7.68583e-05	-0.000345071
458	0.00569109	0.00398741	0.00236357	0.00026552	-3.69638e-05	-0.000312047
457	0.00576985	0.00397256	0.0024421	0.000160191	-3.92803e-05	-0.000321372
456	0.00564476	0.00391489	0.00239594	0.000536683	0.000349308	3.34003e-05
455	0.0057547	0.00404378	0.00250697	0.000726156	0.000313948	7.6938e-05
454	0.0058707	0.00410054	0.00256757	0.000759537	0.000201986	-7.78484e-05
453	0.00576888	0.00420783	0.00273287	0.000697983	0.000360831	-9.99833e-05
452	0.00563704	0.00428055	0.0027679	0.000586239	0.000265421	-0.000158964
451	0.00572328	0.00429758	0.0027144	0.000864608	0.000629875	0.000136274
450	0.00560216	0.00408942	0.00261435	0.000327312	-7.16317e-05	-0.000345348
449	0.00560233	0.00418611	0.0027121	0.000531832	1.76605e-05	-0.000480435
448	0.00557133	0.00418888	0.00275681	0.000567232	0.000216221	-0.0004406
447	0.00537108	0.00407342	0.00270836	0.000595347	0.000265065	5.98714e-05
446	0.00542042	0.00413832	0.00265439	0.000558382	0.000164903	6.49198e-05
445	0.00562914	0.00436535	0.00277015	0.000466675	0.00011804	-6.19106e-05
444	0.00557628	0.00417968	0.00279837	0.000770564	0.000322738	0.000191057
443	0.00555234	0.00425325	0.00283778	0.00087631	0.000391856	0.000187276
442	0.00557952	0.0043623	0.00285046	0.00100607	0.000364771	0.000205431
441	0.00548213	0.00427703	0.00280611	0.00104105	0.000372572	0.000299079
440	0.00560714	0.00434563	0.00304219	0.00111639	0.000523715	0.000304385
439	0.00568463	0.00442742	0.003106	0.00102411	0.00056743	0.000125524
438	0.00560158	0.00441926	0.0031387	0.00113953	0.000842434	0.000313988
437	0.00564025	0.00454219	0.00331026	0.00138345	0.000955741	0.000486077
436	0.00579866	0.00475598	0.00356523	0.00144752	0.00118826	0.000534228
435	0.00587528	0.00474493	0.00369651	0.00140373	0.00110124	0.000541316
434	0.00582962	0.0048682	0.00392572	0.00170301	0.00111257	0.000724751
433	0.00572065	0.00474784	0.00382508	0.00190392	0.00138183	0.000937329
432	0.00562239	0.00479484	0.00377473	0.00216043	0.00170898	0.0010562
431	0.00568155	0.00475821	0.00381172	0.00218021	0.00169197	0.00119344
430	0.00583227	0.00491702	0.00404321	0.00195181	0.00152509	0.00115715
429	0.00574551	0.00510297	0.00424489	0.00189305	0.00161241	0.00109966
428	0.00556077	0.00518375	0.00425984	0.00219884	0.00183114	0.00147346
427	0.0056052	0.00520561	0.00426978	0.00247329	0.00197761	0.00169178
426	0.00590789	0.00536879	0.00458812	0.00266803	0.00211803	0.00169168
425	0.00590881	0.00545988	0.00479027	0.00269771	0.00220834	0.00170702
424	0.00598554	0.00560154	0.00511697	0.00293816	0.00240128	0.00193667
423	0.00593671	0.00563159	0.00512528	0.0031788	0.00248913	0.00194561
422	0.00587803	0.0056075	0.00511222	0.00301859	0.00255734	0.00203962
421	0.00591984	0.005778	0.00524605	0.0030577	0.00259113	0.00210361
420	0.00597399	0.00591105	0.0053739	0.00329024	0.00278116	0.0021809
419	0.00595225	0.00593992	0.00542935	0.00352809	0.00283887	0.0024329
418	0.00599672	0.00598251	0.0055171	0.00357507	0.0030077	0.00247547
417	0.00605016	0.00605109	0.00583568	0.0038407	0.00313859	0.00266257
416	0.00615268	0.00624975	0.0061026	0.00386256	0.0031998	0.00271097
415	0.00621768	0.00639691	0.00631093	0.00417027	0.00335877	0.00287638
414	0.0062218	0.00660829	0.00639727	0.00443419	0.0036194	0.00321337
413	0.00620251	0.00671116	0.00645193	0.00439499	0.00367357	0.00322107
412	0.00629737	0.00672924	0.00668623	0.00439772	0.00395	0.0033337
411	0.00622829	0.00673173	0.00689978	0.0046571	0.00429857	0.00357897
410	0.00632599	0.007008	0.00703966	0.00498269	0.00437404	0.00374433
409	0.00643887	0.0071062	0.00718805	0.00524063	0.0044547	0.0037647
408	0.00639006	0.00726615	0.00730807	0.00528884	0.00441255	0.00389921
407	0.00647302	0.00731023	0.00745816	0.00551704	0.00481441	0.00420157
406	0.00645061	0.00740166	0.0074352	0.00564858	0.00502756	0.00434735
405	0.00633946	0.00742037	0.00759843	0.00600044	0.00525296	0.00460034
404	0.00638305	0.00748877	0.00772675	0.00619431	0.00527574	0.00464277
403	0.00649809	0.00761184	0.00794175	0.00609168	0.00529488	0.00454602
402	0.0062193	0.00761261	0.00803066	0.00596195	0.00508523	0.00445409
401	0.00623694	0.00776443	0.00814145	0.00618039	0.00525142	0.00452314
400	0.00644962	0.00797525	0.00846805	0.00638919	0.00552302	0.00467118
399	0.00637331	0.00801462	0.00851191	0.00645995	0.00549683	0.00466469
398	0.00635308	0.00820908	0.00862086	0.00664194	0.0057073	0.00484537
397	0.00650079	0.00825823	0.0088292	0.00672094	0.00577557	0.00502768
396	0.00661945	0.00836591	0.00899931	0.00691825	0.00608396	0.0054644
395	0.00651491	0.0082962	0.00901414	0.00720034	0.00626648	0.00548811
394	0.00635492	0.00829863	0.00901463	0.00723483	0.00625197	0.00533351
393	0.00648023	0.00855061	0.00931173	0.00710634	0.00620649	0.00550803
392	0.00672155	0.00863772	0.0095807	0.00712663	0.0063982	0.00563172
391	0.00673139	0.00864868	0.00942718	0.00736507	0.00653388	0.00562696
390	0.0066851	0.0087346	0.0094228	0.00746893	0.00644051	0.00558558
389	0.00672113	0.00885022	0.00965704	0.00748869	0.00643156	0.00580248
388	0.0067326	0.00892857	0.00976459	0.00777146	0.00651857	0.00584566
387	0.00656997	0.00891832	0.0096922	0.00764148	0.00665922	0.00578276
386	0.00654536	0.00896983	0.00977841	0.00758174	0.00660666	0.00578634
385	0.00674097	0.0090791	0.00992772	0.00774184	0.00667489	0.00580133
384	0.00665196	0.00902645	0.0099916	0.0078501	0.00664743	0.0057297
383	0.00671171	0.00921947	0.0100804	0.00789502	0.00680055	0.00587854
382	0.00662042	0.00907243	0.00996658	0.00777021	0.00674	0.00587286
381	0.00644518	0.00898507	0.00992695	0.00771752	0.00654293	0.00573619
380	0.00630707	0.00887472	0.00982585	0.00779181	0.00666698	0.00584924
379	0.00641263	0.00895516	0.00987911	0.00783727	0.00678459	0.00583463
378	0.00658074	0.00908723	0.00998921	0.00777686	0.00675798	0.00583275
377	0.00665649	0.00919484	0.0101153	0.0076572	0.00663873	0.00590523
376	0.0066107	0.009211	0.0100957	0.00789815	0.00669524	0.00587692
375	0.00662119	0.00913134	0.00996882	0.0078556	0.00679075	0.00598795
374	0.0066559	0.00931478	0.0100359	0.00784639	0.00679544	0.00606582
373	0.00662179	0.00948333	0.0101006	0.00790405	0.00696718	0.0060523
372	0.00662103	0.00946448	0.0100279	0.00795493	0.00689049	0.00595253
371	0.00668969	0.00930413	0.00987642	0.007907	0.00665699	0.00587945
370	0.00661907	0.00943306	0.010096	0.00797894	0.00705694	0.00606859
369	0.00662856	0.00931344	0.0100513	0.00813912	0.00710111	0.00622413
368	0.00676113	0.00947455	0.0101524	0.00815789	0.00699951	0.00622118
367	0.00675277	0.00941973	0.0101183	0.00800251	0.00674359	0.00603181
366	0.00672288	0.00928574	0.00997783	0.00788338	0.0067696	0.00610686
365	0.00678378	0.00926723	0.00998596	0.0079462	0.00681172	0.00599274
364	0.00671886	0.00913467	0.00984803	0.00774099	0.00666057	0.00586514
363	0.00657969	0.00921836	0.00981612	0.00771895	0.00664426	0.00580378
362	0.00663656	0.00921412	0.00965114	0.00774227	0.00664125	0.00586768
361	0.00675879	0.00931642	0.00992686	0.00756684	0.00649862	0.00583836
360	0.006495	0.00908241	0.00972077	0.00756275	0.00657033	0.00575258
359	0.00645132	0.00916697	0.00945007	0.00745947	0.00640192	0.00549041
358	0.00656421	0.00910426	0.00939602	0.00722979	0.0062961	0.00528007
357	0.0064908	0.00894577	0.00926339	0.00718116	0.00616535	0.00524982
356	0.00647757	0.0089121	0.00918264	0.00713469	0.00623733	0.00516043
355	0.00653444	0.00890948	0.0090962	0.00711552	0.00628907	0.00533529
354	0.00655564	0.0088487	0.00911181	0.00682538	0.00616626	0.00514983
353	0.00667057	0.00893336	0.00912418	0.0068191	0.00587758	0.00508525
352	0.00661438	0.00880031	0.00894074	0.00687986	0.0058021	0.00507553
351	0.0065732	0.00879079	0.00879945	0.00702477	0.00588292	0.00529363
350	0.00664339	0.00865951	0.00878024	0.0069351	0.00606368	0.0052609
349	0.00659221	0.00873837	0.00872229	0.00689726	0.0060698	0.00507951
348	0.00657306	0.00866816	0.00862351	0.00672745	0.0057782	0.00504623
347	0.00662283	0.00861856	0.00845633	0.0065337	0.00583588	0.00493583
346	0.00663353	0.00850575	0.00832136	0.00650905	0.00588884	0.00498964
345	0.00656243	0.00838878	0.00821469	0.0063567	0.00547184	0.00494038
344	0.00661498	0.00846167	0.00825074	0.00613983	0.00557445	0.00507799
343	0.00682939	0.00854661	0.00836971	0.00604264	0.00538417	0.00490702
342	0.0067978	0.0084931	0.00827898	0.00622415	0.00528882	0.00479344
341	0.0067958	0.00832281	0.00797411	0.00646831	0.00545103	0.00522002
340	0.00697357	0.00837579	0.00795107	0.00658015	0.00599635	0.00488168
339	0.00694924	0.00817983	0.00771026	0.0066128	0.00587821	0.00491453
338	0.00694243	0.00804973	0.00737325	0.00652776	0.00576704	0.00497117
337	0.00709266	0.00809398	0.00747564	0.00645832	0.00587929	0.00515302
336	0.00722917	0.00812393	0.00757974	0.00663165	0.00618115	0.00522982
335	0.00716839	0.00807693	0.00761746	0.00629689	0.00607049	0.00507203
334	0.00708812	0.00800441	0.00745991	0.00639379	0.00594275	0.00517179
333	0.00713879	0.00805442	0.00747721	0.00646955	0.00598801	0.00531923
332	0.00734052	0.0081648	0.00753805	0.00659652	0.00607174	0.00539118
331	0.00745454	0.0081449	0.00736372	0.00621399	0.00597239	0.00509974
330	0.00762578	0.00805953	0.00737136	0.0061962	0.00609734	0.00504896
329	0.007614	0.00806373	0.00720585	0.00621716	0.00612365	0.00520448
328	0.00765668	0.00810863	0.0072456	0.005944	0.00586835	0.00522406
327	0.00756901	0.00799778	0.00711462	0.00568299	0.00579335	0.00539029
326	0.00764645	0.00804149	0.00691619	0.00575203	0.00566349	0.00552963
325	0.00788748	0.0080168	0.0071313	0.00588312	0.00590565	0.00563029
324	0.00790218	0.00810243	0.00698404	0.00590422	0.00591859	0.00555363
323	0.00808851	0.0082294	0.00703801	0.00589601	0.00610419	0.00565705
322	0.00828458	0.00812025	0.00705385	0.00579507	0.00624591	0.00574308
321	0.00842052	0.008215	0.00709262	0.00560389	0.00614408	0.00586039
320	0.00862282	0.00837262	0.00710002	0.00575355	0.00636442	0.00634054
319	0.00866416	0.00844136	0.00703538	0.00588803	0.00651854	0.00630267
318	0.00881597	0.00838927	0.00692746	0.00572952	0.00645348	0.00628745
317	0.00917217	0.00858908	0.00693081	0.00567866	0.00636985	0.00654772
316	0.0093189	0.0086879	0.00701261	0.00584425	0.00665626	0.00680985
315	0.00957276	0.00877422	0.00708054	0.00593913	0.00669908	0.0069059
314	0.00972606	0.00861892	0.00692851	0.00587462	0.0068664	0.00719516
313	0.00978144	0.00883597	0.00699663	0.00573443	0.00705195	0.00746844
312	0.00999865	0.00891713	0.00711507	0.00590951	0.00713012	0.00759594
311	0.0104227	0.00905596	0.00730304	0.00611632	0.00742124	0.00788114
310	0.0106831	0.0093542	0.00736091	0.0061732	0.00768597	0.00807083
309	0.0109937	0.00960883	0.00746539	0.00647658	0.00798552	0.00839995
308	0.0114964	0.00989436	0.00779025	0.00649009	0.00796657	0.0087033
307	0.0118713	0.0102642	0.00805056	0.00688984	0.0085916	0.00928562
306	0.0124579	0.0106805	0.00865539	0.00743638	0.00920314	0.00967251
305	0.0134291	0.0115075	0.00928691	0.00765773	0.00946418	0.0101468
304	0.0145044	0.0124484	0.0100246	0.0085048	0.0102431	0.0112213
303	0.0155692	0.0134754	0.0110072	0.00909414	0.0111156	0.012
302	0.0169268	0.0147935	0.0121704	0.00977973	0.0121519	0.0129184
301	0.0185539	0.0162717	0.0135674	0.0111282	0.0132646	0.0141436
300	0.0204949	0.0179092	0.0152664	0.0123527	0.01465	0.0155925
299	0.0226825	0.0200704	0.0174874	0.0138989	0.0163451	0.0173742
298	0.0252451	0.0223578	0.0198968	0.0158771	0.0182053	0.0194595
297	0.0282228	0.0251479	0.0228334	0.0181077	0.0204623	0.0215596
296	0.0317604	0.0287551	0.0264262	0.0204433	0.0225825	0.0238448
295	0.0360142	0.0330109	0.030502	0.0235692	0.0254197	0.0268405
294	0.0408801	0.0377807	0.0353035	0.0272714	0.0291906	0.0304859
293	0.0462146	0.0429888	0.0405066	0.0309737	0.0329352	0.0342138
292	0.0510624	0.0475606	0.0451525	0.0345092	0.0362997	0.03784
291	0.0549868	0.051239	0.0488947	0.0372497	0.0388825	0.0403488
290	0.0583116	0.054572	0.0522445	0.0395209	0.0411095	0.0425257
289	0.0616561	0.0579581	0.0556812	0.042021	0.0437084	0.0451119
288	0.0656819	0.0619339	0.0596526	0.0449735	0.0466877	0.0480542
287	0.0699616	0.0660935	0.0639258	0.0481116	0.0497269	0.0510935
286	0.0738868	0.0699072	0.0677723	0.0508923	0.0522667	0.0537676
285	0.0768861	0.0728335	0.0707139	0.053064	0.0544504	0.0559467
284	0.0791264	0.0749319	0.0729195	0.0545129	0.0557739	0.0574107
283	0.0809173	0.07643	0.0744204	0.0556232	0.0567726	0.0584108
282	0.0822543	0.0777161	0.0755637	0.0565201	0.0577637	0.059469
281	0.0830549	0.078676	0.0765293	0.057349	0.058593	0.0601216
280	0.0834442	0.0790861	0.0769693	0.0574821	0.0587826	0.0602679
279	0.0834663	0.0790387	0.0769426	0.0571866	0.0584632	0.0602272
278	0.0830546	0.0787736	0.076477	0.056874	0.0580112	0.0598385
277	0.0825374	0.0781936	0.07597	0.056575	0.0577711	0.0596933
276	0.0818422	0.0774798	0.0752631	0.055803	0.0571214	0.0590158
275	0.0808064	0.0765098	0.074288	0.054852	0.0561943	0.0579548
274	0.0795265	0.0752073	0.0729461	0.05401	0.0553381	0.0570045
273	0.078118	0.073695	0.0714428	0.052912	0.0541898	0.055979
272	0.0763988	0.0722661	0.0698333	0.0517316	0.0530924	0.0548782
271	0.0746917	0.0707244	0.0681605	0.0505796	0.0519239	0.0538255
270	0.0731131	0.0689726	0.0665312	0.0494554	0.0507197	0.0526182
269	0.0711908	0.0670919	0.0647215	0.0483177	0.0496236	0.0514788
268	0.0692809	0.0653111	0.0627345	0.0467842	0.0480523	0.04985
267	0.0673852	0.0634903	0.0609614	0.0453827	0.0465714	0.0481797
266	0.0656927	0.0618463	0.0592275	0.0443144	0.0455602	0.0471303
265	0.0639476	0.0600287	0.0574051	0.0427695	0.0441185	0.0459866
264	0.0621468	0.0581775	0.0556881	0.0412491	0.0425965	0.0444867
263	0.060188	0.056434	0.0538626	0.0399788	0.0414958	0.043
262	0.0582925	0.0546348	0.0521415	0.0388509	0.0400965	0.0419363
261	0.0569327	0.053268	0.0508558	0.0382012	0.0393913	0.0410655
260	0.0556287	0.0521029	0.0496296	0.0374016	0.0384778	0.0402
259	0.0539663	0.0506062	0.0480483	0.0360761	0.0372543	0.0389054
258	0.0523121	0.0491254	0.0466702	0.0349842	0.036017	0.0375775
257	0.0509299	0.0477697	0.0453462	0.0339801	0.0350575	0.0363998
256	0.0496564	0.0466546	0.0442195	0.0333232	0.0343044	0.0355324
255	0.0486952	0.0458656	0.0434386	0.0329651	0.0336354	0.034939
254	0.0479232	0.0452232	0.0428017	0.0323047	0.0329688	0.0341981
253	0.0471558	0.0446396	0.0422981	0.0318639	0.032518	0.0335182
252	0.0465049	0.0443255	0.0420253	0.0315991	0.0319432	0.0328184
251	0.0460227	0.0438899	0.0419099	0.0313438	0.0315853	0.0323624
250	0.0457289	0.0437186	0.0421315	0.0315372	0.0313483	0.0320552
