# Supplementary material for: Coral anthozoan-specific opsins employ a novel chloride counterion for spectral tuning
Source: eLife. 2025 Sep 1;14:RP105451. doi: 10.7554/eLife.105451 (PMC12401545; doi:10.7554/eLife.105451)
Supplement: Figure 3—figure supplement 3—source data 1. [file elife-105451-fig3-figsupp3-data1.xlsx]

## Sheet: Sheet1
wavelength [nm]	A_abs_Antho2a_E292A_dark_2_8Cl_pH4_9	A_abs_Antho2a_E292A_dark_2_8Cl_pH5_3	A_abs_Antho2a_E292A_dark_2_8Cl_pH6_5	B_abs_Antho2a_E292A_dark_28Cl_pH4_8	B_abs_Antho2a_E292A_dark_28Cl_pH6_5	B_abs_Antho2a_E292A_dark_28Cl_pH8_2	C_abs_Antho2a_E292A_dark_140Cl_pH5_3	C_abs_Antho2a_E292A_dark_140Cl_pH6_5	C_abs_Antho2a_E292A_dark_140Cl_pH7_3	C_abs_Antho2a_E292A_dark_140Cl_pH7_9	C_abs_Antho2a_E292A_dark_140Cl_pH8_4	D_abs_Antho2a_E292A_dark_500Cl_pH6_5	D_abs_Antho2a_E292A_dark_500Cl_pH7_3	D_abs_Antho2a_E292A_dark_500Cl_pH8_5	D_abs_Antho2a_E292A_dark_500Cl_pH9_3
750	-0.00263681	0.00407962	-0.00247535	0.00299247	-0.00234923	0.0129897	0.000507332	0.000512984	0.00127744	0.00296839	0.00202564	0.00511523	-0.00272863	0.0214164	-0.00247683
749	-0.00282236	0.00379554	-0.0025196	0.00296711	-0.0023879	0.0131874	0.000486126	0.000481685	0.00129145	0.00303396	0.00199286	0.00499562	-0.00277912	0.0215	-0.00268545
748	-0.00272842	0.00387381	-0.00262996	0.00295295	-0.00228768	0.0132251	0.000598377	0.000421893	0.00123066	0.00301373	0.00202841	0.00500071	-0.00283628	0.0214075	-0.0025944
747	-0.00284372	0.00407722	-0.0025455	0.0028479	-0.00218811	0.013106	0.000604781	0.000442929	0.0012816	0.00296928	0.00201741	0.00512425	-0.00280127	0.0214956	-0.00241782
746	-0.00270909	0.00423579	-0.00252728	0.0029154	-0.00217674	0.0132369	0.000474931	0.000508034	0.00128597	0.00294535	0.00200261	0.00533711	-0.0026669	0.02163	-0.00245519
745	-0.00265831	0.00398844	-0.00252671	0.00294012	-0.00215683	0.0132532	0.000605122	0.000488565	0.00125486	0.00292312	0.00197753	0.00527783	-0.00272647	0.0216084	-0.00255829
744	-0.00261536	0.00396534	-0.00253396	0.002824	-0.00219433	0.0131356	0.000662022	0.000490974	0.00130391	0.00303027	0.0020385	0.0049569	-0.00290015	0.0217874	-0.00267089
743	-0.00272456	0.00387345	-0.00271266	0.00271773	-0.00240659	0.0129707	0.00051242	0.000441692	0.00130458	0.00299245	0.00200974	0.0048973	-0.00300665	0.021625	-0.00266535
742	-0.00253671	0.00391939	-0.00257598	0.00281094	-0.00234817	0.0129957	0.000623144	0.000435356	0.00132873	0.00293902	0.00198175	0.00507911	-0.00294872	0.0215323	-0.00244035
741	-0.00260374	0.00406857	-0.00252073	0.00294634	-0.0021417	0.013183	0.000614901	0.000455767	0.00124626	0.00296129	0.0019818	0.00504672	-0.00281672	0.021629	-0.00234137
740	-0.00266888	0.00396035	-0.00256593	0.00283598	-0.00222612	0.0130664	0.000557895	0.000546938	0.00126693	0.00312123	0.00206326	0.00496315	-0.00271059	0.0215907	-0.0026155
739	-0.00263887	0.00401009	-0.00253783	0.00289304	-0.0022265	0.0131236	0.000529599	0.000567496	0.00133788	0.00312242	0.00206825	0.00509879	-0.00272907	0.0217153	-0.00238608
738	-0.00265388	0.00394379	-0.00248064	0.00305945	-0.00227222	0.0132203	0.00055802	0.000523658	0.00131207	0.0030103	0.00198422	0.00507131	-0.00281625	0.0216732	-0.00257884
737	-0.002718	0.00397932	-0.00250097	0.00294893	-0.00231692	0.0132403	0.000562173	0.000487939	0.00124539	0.00297874	0.00203235	0.00491526	-0.00280793	0.021584	-0.00279983
736	-0.00273982	0.00390869	-0.00246603	0.00276869	-0.00234042	0.0131496	0.000554821	0.000453159	0.00120753	0.00304802	0.00197601	0.00507485	-0.00276277	0.0215176	-0.00275307
735	-0.00283297	0.00390481	-0.0026059	0.00279548	-0.00254433	0.0129911	0.000526445	0.000416036	0.00124543	0.00303695	0.00194122	0.00494339	-0.00291773	0.0213504	-0.00278068
734	-0.00271972	0.00402117	-0.00263205	0.00295046	-0.00244213	0.0131161	0.000559309	0.000322686	0.00118334	0.00289613	0.00181608	0.00494761	-0.00297178	0.0214423	-0.00271266
733	-0.00281326	0.00381714	-0.00273711	0.00284438	-0.00245282	0.0131432	0.000597333	0.000353522	0.00116613	0.00291466	0.00195392	0.0048568	-0.00297461	0.0213872	-0.00281945
732	-0.00288908	0.00373498	-0.00281498	0.00289391	-0.00247755	0.0130329	0.000585167	0.000398811	0.00120007	0.00296226	0.00199327	0.00474519	-0.00300045	0.0213837	-0.00286329
731	-0.0027613	0.00401014	-0.00270652	0.0028791	-0.00238031	0.0131081	0.000610524	0.00049594	0.00125917	0.00299518	0.00205794	0.00471074	-0.0028376	0.0214741	-0.00268062
730	-0.00269935	0.00409211	-0.00256492	0.00283576	-0.00234401	0.0131765	0.000608594	0.000466853	0.00123677	0.00298758	0.00202391	0.0047889	-0.00279795	0.0214666	-0.00262544
729	-0.00278368	0.00406211	-0.00260507	0.00281078	-0.00245886	0.0131292	0.000565415	0.000398333	0.00120911	0.00293743	0.00189761	0.00481029	-0.00292975	0.0212999	-0.00266579
728	-0.00279015	0.00388238	-0.00265342	0.00278355	-0.00248606	0.0132492	0.000509396	0.000427355	0.00116091	0.00291775	0.00193632	0.00474246	-0.00296575	0.0213324	-0.00262404
727	-0.00281745	0.00388713	-0.00275787	0.0028558	-0.00238693	0.0131482	0.000500143	0.000427107	0.00120638	0.0029051	0.00198608	0.00479718	-0.00303046	0.0213355	-0.00271382
726	-0.00280199	0.00397975	-0.00264962	0.00294497	-0.00224254	0.013096	0.000447747	0.000457861	0.00127094	0.00293866	0.00200446	0.00495672	-0.00298691	0.0213688	-0.00268725
725	-0.00277019	0.00406221	-0.00247218	0.0029266	-0.00225657	0.0131753	0.000487161	0.000452994	0.00121336	0.00297159	0.00203628	0.00488857	-0.00308376	0.0213218	-0.00266143
724	-0.00259189	0.00404131	-0.00252368	0.00295355	-0.00214929	0.0132939	0.000513531	0.000444942	0.00123198	0.00298925	0.00206306	0.00506349	-0.00283642	0.021399	-0.00249345
723	-0.00260115	0.00400644	-0.00260194	0.00310281	-0.00215622	0.0131158	0.000569629	0.00041074	0.00120875	0.00299018	0.00201874	0.00517274	-0.0026772	0.0214513	-0.00245391
722	-0.0028147	0.00380923	-0.00258713	0.00286922	-0.0021928	0.0130567	0.000565926	0.000425375	0.00119855	0.00301181	0.00199081	0.00490263	-0.00286839	0.0213313	-0.0025534
721	-0.00257054	0.00402002	-0.00234889	0.00299144	-0.0020278	0.0133352	0.000592206	0.000474888	0.00123499	0.00299785	0.00204871	0.00512289	-0.00279108	0.0215075	-0.00227012
720	-0.00252277	0.00391243	-0.0023523	0.00317981	-0.00210313	0.0133847	0.0005292	0.000457993	0.00115403	0.00294796	0.00198823	0.0052961	-0.00265503	0.0216187	-0.00231239
719	-0.00263261	0.00378955	-0.00249907	0.00303844	-0.00238402	0.0132665	0.000558461	0.000427338	0.00112725	0.0028887	0.00195044	0.00496412	-0.00269805	0.0215389	-0.00253259
718	-0.00245531	0.00400042	-0.00250853	0.00300473	-0.0022521	0.0133267	0.000590708	0.000434977	0.0011221	0.00288591	0.00196504	0.00487744	-0.00266987	0.0216877	-0.00253683
717	-0.00256226	0.00398043	-0.00265898	0.0028994	-0.0023075	0.0131876	0.000503072	0.000444761	0.00113061	0.0028316	0.00186689	0.00480377	-0.00288413	0.0215055	-0.00270385
716	-0.00273111	0.00399664	-0.00255397	0.00280791	-0.00239308	0.0131424	0.000483876	0.000488664	0.00125155	0.00295814	0.00195981	0.00488394	-0.00296788	0.0214888	-0.00271244
715	-0.00253261	0.00411775	-0.00262564	0.00294586	-0.00232773	0.0132006	0.000578473	0.000506219	0.00127133	0.00302777	0.00194099	0.00496749	-0.00301346	0.0216505	-0.00262919
714	-0.00280983	0.00386357	-0.00274602	0.00295828	-0.00242195	0.0131054	0.000528971	0.000521943	0.00123489	0.0029469	0.00190619	0.0048186	-0.00293789	0.0215321	-0.00275073
713	-0.00277754	0.00399761	-0.002577	0.00284047	-0.00232731	0.0132155	0.000468398	0.000475762	0.00123566	0.00291191	0.0019083	0.00495456	-0.00282937	0.0216333	-0.00256023
712	-0.00265942	0.00403721	-0.00245232	0.00295984	-0.00219946	0.0132961	0.000476569	0.00046776	0.00119589	0.0029425	0.00193555	0.00506805	-0.00269529	0.0215099	-0.00246945
711	-0.00256779	0.00402123	-0.00245345	0.00306969	-0.00212632	0.0133285	0.000578549	0.000490463	0.00122067	0.00294058	0.00197592	0.00500138	-0.00263657	0.0215139	-0.00247153
710	-0.00274721	0.00388682	-0.00261639	0.00304123	-0.00222452	0.0131483	0.000511836	0.000388698	0.00115597	0.00288963	0.00199373	0.00488425	-0.00272046	0.0214799	-0.00249456
709	-0.00265459	0.0040007	-0.0023699	0.00316042	-0.00216198	0.0132991	0.000548737	0.000375498	0.0011603	0.00293098	0.00197271	0.00505397	-0.002823	0.0215775	-0.00240429
708	-0.0024571	0.00417049	-0.00232682	0.00331713	-0.00201317	0.0134316	0.000597218	0.00037436	0.0012023	0.00289252	0.00197802	0.00519224	-0.0027922	0.021565	-0.00252665
707	-0.00256805	0.00411163	-0.00247503	0.00318093	-0.00214677	0.013338	0.000532625	0.000498762	0.00127528	0.0029829	0.00209591	0.00504199	-0.00285598	0.0215192	-0.00257044
706	-0.0025136	0.00411977	-0.00237325	0.00306046	-0.00221646	0.013438	0.000440876	0.000427585	0.00119451	0.00295122	0.00195985	0.00510988	-0.00283687	0.0216095	-0.00242572
705	-0.00237531	0.0040713	-0.00243124	0.00298186	-0.00229302	0.0132843	0.000486823	0.00037997	0.00118714	0.00292026	0.00186353	0.00506725	-0.00286834	0.0214771	-0.0025272
704	-0.0024553	0.00402862	-0.00248327	0.00300467	-0.00218243	0.013274	0.000583353	0.00036154	0.00112043	0.00285639	0.00186754	0.00503225	-0.00274914	0.0214045	-0.0025986
703	-0.00253152	0.00404325	-0.00230662	0.00299374	-0.00213067	0.0132806	0.000534267	0.0004442	0.00112082	0.00291648	0.00192168	0.00511505	-0.00259871	0.0215278	-0.00245523
702	-0.00252803	0.00414206	-0.00231615	0.00321921	-0.00205661	0.0133545	0.000500821	0.000425193	0.0011852	0.00294852	0.00194188	0.0052551	-0.00258024	0.0215385	-0.00233117
701	-0.00239923	0.00415186	-0.00240534	0.00331022	-0.00207332	0.0133184	0.000588442	0.000440405	0.00116634	0.0029543	0.00194632	0.00510796	-0.00253192	0.0213815	-0.00226336
700	-0.00253425	0.00399486	-0.00235662	0.00307695	-0.00224113	0.0132683	0.000551452	0.000426975	0.00114026	0.00294814	0.00190863	0.00503571	-0.00260349	0.0211898	-0.00243011
699	-0.00248057	0.00388127	-0.00236867	0.00293646	-0.00214127	0.0132156	0.000599203	0.000462662	0.00124551	0.00293957	0.00193335	0.00500982	-0.00283014	0.0211153	-0.00247123
698	-0.00235353	0.00409168	-0.00220553	0.00313672	-0.00194522	0.0132796	0.000640337	0.000440735	0.00121582	0.00287249	0.00189756	0.00513209	-0.00266866	0.0211705	-0.00243175
697	-0.00229538	0.00417265	-0.00218306	0.00328618	-0.0019336	0.013438	0.000555254	0.000448638	0.00128975	0.00291692	0.00194148	0.00522877	-0.00261737	0.0213515	-0.00225822
696	-0.00230358	0.0043036	-0.00227709	0.00314969	-0.00188806	0.0134733	0.000571112	0.000423081	0.00125632	0.00297066	0.00196103	0.00519353	-0.00257195	0.0213864	-0.00223214
695	-0.00230267	0.00425174	-0.00246906	0.00310065	-0.00183672	0.0135656	0.000591889	0.000419353	0.00121777	0.00296959	0.00203881	0.00517348	-0.00255133	0.0214135	-0.00221528
694	-0.00244933	0.00412712	-0.00247792	0.003065	-0.00211008	0.013467	0.000563589	0.000424418	0.00118887	0.00291576	0.00198013	0.00518286	-0.00251863	0.0214678	-0.00226057
693	-0.00257543	0.00408768	-0.00221803	0.00311635	-0.00224109	0.0133771	0.0005443	0.000354083	0.00115046	0.00286854	0.00189167	0.0050467	-0.00259721	0.0216486	-0.0022464
692	-0.00249238	0.00402353	-0.00231043	0.00319226	-0.0021146	0.0134862	0.000504897	0.000368024	0.00113287	0.00288347	0.00194875	0.00506007	-0.00250416	0.0218423	-0.00221991
691	-0.00243512	0.00408969	-0.0022576	0.00315565	-0.00205689	0.0135219	0.000578938	0.000374343	0.00115916	0.00297944	0.00200233	0.00509624	-0.00265736	0.0221399	-0.00233852
690	-0.00262075	0.00400243	-0.00225394	0.00322236	-0.00201832	0.0134879	0.000571012	0.000355617	0.00120168	0.00304461	0.00199833	0.00504512	-0.00274358	0.0222472	-0.00226934
689	-0.0026098	0.00410686	-0.00252069	0.00307392	-0.00205732	0.0134285	0.000542612	0.000475003	0.00130081	0.00304889	0.00209207	0.00520044	-0.00247761	0.0224986	-0.00237016
688	-0.00271594	0.00381311	-0.00283947	0.00294826	-0.00218752	0.013161	0.00063196	0.000423873	0.00126425	0.00295558	0.00202421	0.00502049	-0.00259985	0.0224678	-0.00250255
687	-0.00269565	0.00372892	-0.00275209	0.00309469	-0.00221919	0.0132124	0.000633594	0.000393763	0.00123106	0.00300076	0.00200319	0.00484884	-0.00282026	0.0224963	-0.00249917
686	-0.00257321	0.00376099	-0.00282678	0.00308444	-0.00230724	0.0133134	0.000621631	0.000389143	0.0012309	0.00297362	0.00197178	0.00489225	-0.00283406	0.0224984	-0.00252999
685	-0.00286912	0.00339149	-0.00309473	0.002738	-0.00259957	0.0130009	0.000612635	0.000343391	0.00111271	0.00299885	0.00191868	0.0046401	-0.00301158	0.022183	-0.00268262
684	-0.00323178	0.00334738	-0.00321454	0.00269345	-0.00253603	0.0129924	0.000619616	0.000330605	0.00112524	0.00297667	0.00192303	0.0044882	-0.00323275	0.0220259	-0.0028188
683	-0.00274919	0.00372215	-0.00274627	0.0031514	-0.00231055	0.0132799	0.000595619	0.000279029	0.00106712	0.00292296	0.0018748	0.00491203	-0.00294903	0.0224249	-0.00236363
682	-0.00261233	0.00379022	-0.00256696	0.00333376	-0.00226016	0.013292	0.000550213	0.000266193	0.000959115	0.00284487	0.00184884	0.00494434	-0.00270816	0.0225552	-0.00222507
681	-0.00265308	0.00383999	-0.00257462	0.00329011	-0.00230779	0.0135611	0.000516551	0.000328361	0.00110008	0.00291027	0.00192859	0.00508292	-0.00260341	0.0224802	-0.00223133
680	-0.00270963	0.00375899	-0.00276526	0.00318897	-0.00223565	0.0134534	0.000502075	0.00038096	0.00117087	0.00293954	0.00198366	0.00506497	-0.00283895	0.0223604	-0.00219928
679	-0.00295474	0.00355996	-0.00298168	0.00304729	-0.00243367	0.0132325	0.000426352	0.000426942	0.00117748	0.00293247	0.00196668	0.00471656	-0.00279253	0.0217959	-0.00256243
678	-0.00263716	0.00397926	-0.00249869	0.00318929	-0.00215675	0.0134961	0.000509442	0.000428229	0.00122194	0.00292649	0.00192404	0.00515751	-0.00255599	0.0217759	-0.00235996
677	-0.00247483	0.00402691	-0.00230027	0.00340898	-0.00205217	0.0136353	0.000440636	0.000362646	0.00119451	0.0029884	0.00198115	0.00530118	-0.00248261	0.0218469	-0.00218585
676	-0.00230332	0.00409268	-0.00211087	0.00349845	-0.002032	0.0137334	0.00050551	0.000340587	0.0012005	0.00299985	0.00193809	0.00543626	-0.00239663	0.0220319	-0.00212654
675	-0.00239578	0.00409066	-0.00213448	0.00340155	-0.00195005	0.0137365	0.000588941	0.000371473	0.00121677	0.00298752	0.00198625	0.0052362	-0.00230496	0.022	-0.00220617
674	-0.00249953	0.00406718	-0.00241516	0.00321037	-0.0021504	0.0136289	0.000555902	0.000423774	0.00120504	0.00296203	0.0020573	0.00501245	-0.0025821	0.0218712	-0.00227936
673	-0.00233106	0.00425743	-0.00240174	0.00325104	-0.00218877	0.0136848	0.000483455	0.000424583	0.00121591	0.00297146	0.00203687	0.00518969	-0.00255146	0.0219799	-0.00220096
672	-0.00234448	0.00414218	-0.00228985	0.00338272	-0.00208591	0.0135807	0.000551459	0.000408843	0.00118668	0.00302003	0.00195602	0.00517676	-0.00259064	0.021976	-0.00221915
671	-0.00234933	0.00398817	-0.00242075	0.00328523	-0.00220728	0.0134606	0.00052039	0.000400725	0.00109944	0.0029319	0.00186931	0.00506717	-0.00268247	0.0220472	-0.00224549
670	-0.00244261	0.00389582	-0.00237501	0.00322554	-0.00238647	0.0134772	0.000498027	0.000449364	0.00119997	0.00300417	0.00193961	0.00513274	-0.00268306	0.022031	-0.00227398
669	-0.00250257	0.0039687	-0.00240336	0.00322336	-0.002199	0.0133978	0.000563301	0.000527486	0.00128197	0.00306874	0.00207274	0.00511905	-0.00263457	0.0219514	-0.00245248
668	-0.00252183	0.0039926	-0.00233992	0.00332057	-0.00212582	0.0133895	0.000553472	0.000494554	0.00123453	0.0030331	0.00202812	0.0052715	-0.00238944	0.0221559	-0.00239073
667	-0.00236143	0.00408439	-0.0022675	0.00338007	-0.00215067	0.0135891	0.000529829	0.000450981	0.00122363	0.00299095	0.00199176	0.0051488	-0.0024331	0.0220995	-0.00215942
666	-0.00248319	0.00402725	-0.00244745	0.00302858	-0.00238265	0.013514	0.00055421	0.000431825	0.00114596	0.00299274	0.00201016	0.00495535	-0.00265088	0.0218066	-0.00235196
665	-0.00221931	0.00420407	-0.00218621	0.00322827	-0.00213867	0.013728	0.00058404	0.000394901	0.00120907	0.00295317	0.00197858	0.00528098	-0.00245919	0.0221478	-0.00208637
664	-0.00234329	0.00425493	-0.00234786	0.0031487	-0.00209387	0.0135919	0.000639534	0.00043892	0.0012816	0.00295057	0.00197604	0.00519848	-0.00253896	0.0222677	-0.00192504
663	-0.00255763	0.00429281	-0.00248616	0.00320857	-0.00223802	0.0135926	0.000552632	0.000505675	0.00129462	0.002926	0.00193869	0.0051674	-0.00265732	0.022219	-0.00210323
662	-0.00252738	0.0041385	-0.00237818	0.00331525	-0.00224412	0.0135863	0.000556645	0.000521646	0.00128813	0.00294597	0.00200413	0.00511154	-0.00255336	0.0222783	-0.00213463
661	-0.00238188	0.00394142	-0.00226754	0.00333376	-0.00204486	0.0134784	0.000554519	0.000470961	0.0012312	0.002965	0.00196801	0.00522907	-0.00232201	0.0222154	-0.0021042
660	-0.00249162	0.00389244	-0.00253415	0.00322168	-0.00213743	0.0133765	0.000527963	0.000408529	0.00123317	0.00297063	0.00199215	0.00516676	-0.00248784	0.0220635	-0.00229803
659	-0.00251877	0.00404732	-0.00242334	0.00322576	-0.00219011	0.0134542	0.000516871	0.000486025	0.00131078	0.00301735	0.00205104	0.0051701	-0.00257632	0.0220818	-0.00211511
658	-0.00240902	0.00403281	-0.00225368	0.00328866	-0.00224408	0.0136412	0.000550361	0.000426134	0.001287	0.00302953	0.00197943	0.00528334	-0.00250901	0.0221271	-0.00204403
657	-0.00230334	0.00405764	-0.00224748	0.00336219	-0.00210778	0.0136725	0.000586545	0.000442913	0.00121839	0.00294066	0.00192967	0.00528565	-0.00235389	0.0221524	-0.00211474
656	-0.00220262	0.00415057	-0.00235016	0.00350187	-0.00199095	0.0135348	0.000580842	0.000443886	0.00122534	0.0029132	0.00193553	0.00522784	-0.00240061	0.0220564	-0.00221832
655	-0.00221957	0.0041603	-0.00228146	0.00357699	-0.00201032	0.0136723	0.000516293	0.00043275	0.00124661	0.00296969	0.00201161	0.0051437	-0.00244561	0.0220961	-0.00202119
654	-0.00242888	0.00420353	-0.00232548	0.00347403	-0.00195308	0.0136891	0.00052656	0.000432717	0.00129425	0.00301839	0.00207204	0.00516801	-0.00256068	0.0222316	-0.00196318
653	-0.00240427	0.00419783	-0.00225176	0.00345513	-0.00193461	0.0137507	0.000572861	0.000399868	0.00133976	0.00303837	0.00206785	0.00524032	-0.00248685	0.0222293	-0.00207666
652	-0.00238174	0.00407013	-0.00234798	0.0034442	-0.00214402	0.0135554	0.000602692	0.000409156	0.00134354	0.00299456	0.00203556	0.00525975	-0.00244246	0.0221578	-0.00221917
651	-0.00251992	0.00394742	-0.00229744	0.00338733	-0.00233268	0.0133401	0.000512839	0.000453076	0.00130702	0.00301849	0.00204304	0.00530606	-0.00253413	0.021964	-0.00225369
650	-0.00236331	0.00415279	-0.00223379	0.00338973	-0.00221225	0.0135375	0.000556036	0.000414485	0.00123917	0.00296664	0.00198902	0.00536932	-0.00242217	0.0221457	-0.00207064
649	-0.00251249	0.00401616	-0.00236278	0.00314795	-0.00218431	0.0134881	0.000551713	0.000368486	0.00117371	0.00290408	0.0019693	0.00523198	-0.00241512	0.022105	-0.00223006
648	-0.00232874	0.00412896	-0.00229168	0.00317941	-0.00213865	0.0135729	0.000552794	0.000396353	0.00114822	0.0028921	0.00194424	0.00534796	-0.00233559	0.0221084	-0.00224741
647	-0.00216194	0.00424238	-0.00217189	0.00341208	-0.00208522	0.0136947	0.000504181	0.000375399	0.0011806	0.00292519	0.00190024	0.005442	-0.00225236	0.0221793	-0.00203853
646	-0.00237549	0.00419435	-0.00208621	0.00345394	-0.00196924	0.0137694	0.000480458	0.000437039	0.00125467	0.0029417	0.00195372	0.00559372	-0.00243086	0.0222445	-0.00201184
645	-0.0022045	0.00443963	-0.0019906	0.00354939	-0.00185518	0.013897	0.000513996	0.000437155	0.00123272	0.00301072	0.00199474	0.00553324	-0.00226256	0.0223625	-0.00199929
644	-0.00240047	0.00424676	-0.00213194	0.00351169	-0.00199963	0.0137403	0.000607023	0.000400544	0.00117564	0.00299308	0.00200333	0.00527061	-0.00228546	0.0222174	-0.00210759
643	-0.00236283	0.00410025	-0.00228906	0.00332285	-0.00212179	0.0135889	0.000611807	0.000402573	0.00126512	0.00298328	0.00194836	0.0052456	-0.00239851	0.0220969	-0.00215275
642	-0.00227309	0.00419074	-0.00221789	0.00325599	-0.0021758	0.0136981	0.000573371	0.000439234	0.00129861	0.00299639	0.00197767	0.00530886	-0.0023919	0.0222965	-0.00205039
641	-0.00205954	0.00432427	-0.00224901	0.00342222	-0.00199915	0.0138167	0.000600151	0.000438046	0.00121975	0.00299942	0.00198472	0.00543264	-0.00235935	0.0222699	-0.00191622
640	-0.00204314	0.00424509	-0.00227461	0.00344081	-0.00187743	0.0139142	0.000586485	0.000423593	0.00119737	0.00297887	0.00202661	0.0056547	-0.00232401	0.0222949	-0.00203265
639	-0.00229956	0.00419362	-0.00229457	0.00350114	-0.00202782	0.0136844	0.000621523	0.000422817	0.00119655	0.00300176	0.00204483	0.00552266	-0.00242041	0.0222764	-0.00202042
638	-0.00236274	0.00412871	-0.00223903	0.00338728	-0.00215079	0.0136075	0.000599837	0.00043308	0.00121543	0.00296737	0.00200589	0.00530123	-0.00242617	0.0221727	-0.00202348
637	-0.00248008	0.00406385	-0.00234086	0.0032945	-0.00227639	0.0135976	0.000563297	0.000485018	0.00128225	0.00300667	0.00205625	0.00525928	-0.00249139	0.0220618	-0.00224394
636	-0.00246274	0.00402818	-0.00235406	0.00331436	-0.00218017	0.013626	0.000554248	0.000460336	0.00126688	0.00296666	0.00200589	0.00525172	-0.00250721	0.0221148	-0.00215762
635	-0.00232447	0.00401214	-0.00220831	0.0033512	-0.00213774	0.0137347	0.000511872	0.000440916	0.00119362	0.00299489	0.00198738	0.00526547	-0.00250736	0.0222978	-0.00208126
634	-0.00229039	0.00417368	-0.00205488	0.00345465	-0.00215994	0.0137845	0.000560749	0.000483302	0.00130721	0.00310751	0.00208137	0.00530759	-0.00237863	0.0224192	-0.00206597
633	-0.00242221	0.00415332	-0.00209359	0.00343788	-0.00206276	0.0137314	0.000507003	0.000393895	0.00129212	0.00303352	0.00206574	0.00543743	-0.00241928	0.0224148	-0.00199424
632	-0.00216023	0.00426337	-0.00192338	0.00357932	-0.00185383	0.0138344	0.00057776	0.000416778	0.00135262	0.00298573	0.00201039	0.0056955	-0.00216287	0.0225177	-0.00186302
631	-0.00215121	0.00425957	-0.00201119	0.00362985	-0.00190198	0.0138558	0.000553801	0.000433162	0.00133074	0.00299587	0.00202226	0.00554951	-0.00225796	0.0224797	-0.00190419
630	-0.00221807	0.00420385	-0.00214433	0.00358439	-0.00187573	0.0137853	0.000544051	0.000411862	0.00124835	0.00296416	0.0019917	0.00555345	-0.00220282	0.0224971	-0.00184003
629	-0.00226714	0.00428477	-0.00210761	0.00357469	-0.00188537	0.0137219	0.000586555	0.000411367	0.00129962	0.00294165	0.00196983	0.00543628	-0.00218066	0.0225197	-0.00190792
628	-0.00229627	0.00429279	-0.00221487	0.00369342	-0.00187784	0.0138454	0.000569679	0.000426299	0.00131399	0.00299102	0.00194857	0.00552249	-0.00223745	0.0224553	-0.00195286
627	-0.0022698	0.00428255	-0.00216483	0.00380006	-0.00190526	0.0139037	0.000556603	0.000543688	0.00135556	0.00298746	0.00200707	0.00564147	-0.00219595	0.0226395	-0.00185052
626	-0.00216954	0.00432908	-0.00215667	0.00390414	-0.00186367	0.0137684	0.000529694	0.000483533	0.00126504	0.00298035	0.00196017	0.00564219	-0.00224442	0.0225723	-0.00182393
625	-0.00215509	0.0041427	-0.00222324	0.00364409	-0.00188721	0.0136916	0.000581778	0.000383484	0.00115804	0.00287178	0.0018912	0.00544457	-0.00241491	0.0223229	-0.00193597
624	-0.00201255	0.0043027	-0.00205857	0.003658	-0.00195288	0.0137204	0.000593415	0.000414452	0.00121026	0.00293173	0.00191504	0.0054147	-0.00220833	0.0224602	-0.00193564
623	-0.00204238	0.00440764	-0.00204568	0.00381273	-0.0020334	0.0137755	0.000563492	0.000451476	0.00127472	0.00301366	0.00197219	0.00540282	-0.00227457	0.0225618	-0.00193685
622	-0.00200214	0.00453681	-0.00203039	0.0038928	-0.00175189	0.013988	0.00056891	0.000472413	0.0013151	0.00297207	0.00195297	0.00551967	-0.00212151	0.0228356	-0.00181494
621	-0.00210656	0.00431866	-0.00204863	0.00371489	-0.00179042	0.0138211	0.00054726	0.000492558	0.0012931	0.00297674	0.00197541	0.00554134	-0.00225224	0.0225874	-0.00181101
620	-0.00217069	0.00433656	-0.00229403	0.00367091	-0.00196787	0.0137219	0.000587624	0.000501715	0.00126074	0.00296492	0.00209457	0.00544771	-0.00229777	0.0224407	-0.0019393
619	-0.00234707	0.00418217	-0.00240863	0.00356079	-0.00208646	0.0136429	0.000619515	0.000452598	0.00124191	0.00296833	0.00198857	0.00539803	-0.00215063	0.022324	-0.00205764
618	-0.00219415	0.00430077	-0.00212733	0.00357651	-0.00182987	0.0138459	0.000573419	0.000454314	0.00131361	0.00301993	0.00198214	0.00559324	-0.00196577	0.0222876	-0.00173262
617	-0.00232779	0.00425147	-0.0022523	0.00347873	-0.00197931	0.0137317	0.000592006	0.000430967	0.0012136	0.00291232	0.00186587	0.00552171	-0.00229562	0.0221819	-0.00182461
616	-0.00222601	0.00424177	-0.00216127	0.00363569	-0.0019808	0.0136031	0.000593523	0.000389126	0.0011897	0.00290878	0.00185919	0.00555632	-0.00223707	0.022441	-0.00175395
615	-0.00201828	0.00437919	-0.0020864	0.00389618	-0.00176141	0.013763	0.000583657	0.000472215	0.00120809	0.00298611	0.00195111	0.00562779	-0.00215192	0.0225641	-0.00171467
614	-0.00217393	0.00403012	-0.00223919	0.00377412	-0.0019211	0.0136481	0.000623011	0.000550964	0.00128116	0.00302971	0.00201882	0.00556212	-0.00230722	0.0224663	-0.00202
613	-0.00225736	0.00422407	-0.00230401	0.00369663	-0.00188618	0.0137084	0.000621618	0.000522404	0.00133205	0.00296335	0.00209175	0.00541122	-0.00219377	0.0224408	-0.00202157
612	-0.00223705	0.00434907	-0.00236458	0.00355951	-0.00205801	0.0137292	0.000610466	0.000532981	0.00135739	0.00296162	0.00204788	0.00539219	-0.00218494	0.0223439	-0.00197104
611	-0.00220745	0.00416657	-0.00231375	0.00379297	-0.00199691	0.0137971	0.000621136	0.00057002	0.00137845	0.00308713	0.00206288	0.00542306	-0.00237861	0.0223751	-0.00203467
610	-0.00218263	0.00422276	-0.00206403	0.00387403	-0.00182841	0.0139578	0.00056347	0.00052483	0.00126329	0.00308699	0.00206839	0.00566482	-0.00227716	0.0225214	-0.00192588
609	-0.00222892	0.0042924	-0.00215257	0.00377779	-0.00175527	0.0138422	0.000608424	0.000522223	0.00127287	0.00303467	0.00207539	0.00568582	-0.00233138	0.0224385	-0.00190551
608	-0.00208532	0.00443098	-0.00215808	0.00406004	-0.00178659	0.0136697	0.000615628	0.00052516	0.00127546	0.00298436	0.00203344	0.00558325	-0.0022381	0.022638	-0.00197016
607	-0.00197235	0.00465449	-0.00205081	0.00399351	-0.00175082	0.0138791	0.000613029	0.000542764	0.00129216	0.00302608	0.00202632	0.00571881	-0.00184241	0.0226255	-0.0017689
606	-0.00208072	0.00447031	-0.00215574	0.00379976	-0.00180401	0.0138834	0.000556519	0.000459494	0.00132524	0.00301744	0.00201637	0.00569608	-0.00193845	0.0224735	-0.00184185
605	-0.00210757	0.00439804	-0.00214202	0.00392822	-0.00175113	0.0138114	0.000614717	0.000457778	0.00132513	0.0029606	0.0019446	0.00564168	-0.00199103	0.0225212	-0.00189901
604	-0.00204154	0.00457548	-0.0020989	0.00402766	-0.00176072	0.0139018	0.000701827	0.00052879	0.00133166	0.00294649	0.00201357	0.00564708	-0.00201214	0.0225074	-0.00177192
603	-0.00194419	0.0044672	-0.00217691	0.00381719	-0.00178808	0.0138299	0.000666301	0.00055532	0.00138887	0.00303517	0.00202476	0.00563809	-0.00201713	0.0225004	-0.00184472
602	-0.00186947	0.00450647	-0.00193346	0.00383514	-0.00162052	0.0140989	0.000620122	0.00053562	0.00130233	0.00293067	0.00200434	0.00577495	-0.00191315	0.0225049	-0.00179358
601	-0.00179061	0.00465003	-0.00174987	0.00387682	-0.00166388	0.0140177	0.000613826	0.000551987	0.00139353	0.00302654	0.0020726	0.00588357	-0.00185421	0.0225575	-0.00173013
600	-0.0018034	0.00473275	-0.00192798	0.0040043	-0.00177838	0.0138568	0.000654523	0.000591799	0.00133676	0.0030207	0.00208446	0.00564785	-0.00176782	0.0225703	-0.00184757
599	-0.00195484	0.00479633	-0.00208818	0.00413202	-0.00170063	0.0139807	0.000711437	0.000550222	0.00121415	0.00297956	0.00196344	0.00567052	-0.0017265	0.0226527	-0.00176495
598	-0.00186595	0.00461919	-0.00216398	0.00407584	-0.00167832	0.0139047	0.000782037	0.000516696	0.00124869	0.00296065	0.00196169	0.00568638	-0.00195161	0.0227318	-0.00180851
597	-0.00198044	0.00475453	-0.00210713	0.00389578	-0.00174555	0.013821	0.000726905	0.000578666	0.00141335	0.00303061	0.00201865	0.005761	-0.00194571	0.0225168	-0.00173486
596	-0.0019003	0.00480356	-0.00205079	0.00409729	-0.00153588	0.0138746	0.000665922	0.000604057	0.00142736	0.00305421	0.00203097	0.005879	-0.0017267	0.0224895	-0.00172924
595	-0.00191188	0.00459387	-0.00192532	0.00411264	-0.00162429	0.0138038	0.000728499	0.000597277	0.00139051	0.00307876	0.0020331	0.00583204	-0.00179782	0.0227298	-0.00187101
594	-0.00184923	0.00464026	-0.00184094	0.00409419	-0.00158597	0.0138665	0.000806656	0.000581866	0.00139116	0.0030679	0.00211998	0.00587027	-0.00179895	0.0226761	-0.00179147
593	-0.00201693	0.00464875	-0.00196268	0.00411567	-0.0017626	0.0137773	0.000769234	0.000575597	0.00130154	0.00300081	0.00205331	0.00574938	-0.00188614	0.0225392	-0.00189651
592	-0.00190885	0.00472088	-0.00197759	0.00415968	-0.00166004	0.013752	0.000828661	0.000586635	0.00133848	0.0029571	0.00199741	0.0057391	-0.00173573	0.0225619	-0.00195627
591	-0.00192726	0.00467504	-0.00210893	0.00391958	-0.00172043	0.0136762	0.000837705	0.000710359	0.00145776	0.00301356	0.00205321	0.00571786	-0.0018623	0.0224287	-0.00201499
590	-0.00187899	0.00463341	-0.00213087	0.00412244	-0.00172591	0.0138439	0.000851599	0.000707226	0.0014769	0.00294571	0.00204205	0.00582734	-0.00179869	0.0225351	-0.00190291
589	-0.00186082	0.00475527	-0.00215528	0.00412668	-0.00157873	0.0140345	0.000858873	0.000696236	0.00139932	0.00298371	0.00197496	0.00603242	-0.00166402	0.0226742	-0.00180397
588	-0.0018061	0.00487859	-0.00211135	0.00421819	-0.00151312	0.013924	0.000834404	0.000734069	0.00137417	0.00300957	0.00201858	0.00587607	-0.00152715	0.0227585	-0.00173223
587	-0.00178596	0.00481734	-0.00212725	0.00443348	-0.00154776	0.0137684	0.000919034	0.00075875	0.00146256	0.00304297	0.00206524	0.00575955	-0.0015318	0.0226926	-0.00176741
586	-0.00184425	0.00497669	-0.00214188	0.00450475	-0.00133671	0.013846	0.000872875	0.000804155	0.00148393	0.00317291	0.00209484	0.00607831	-0.00151232	0.0227772	-0.00167497
585	-0.00178109	0.00497618	-0.00204892	0.00459701	-0.00120867	0.0139642	0.000858459	0.000816926	0.00158499	0.00322906	0.00208066	0.0063743	-0.00138123	0.0228626	-0.00161767
584	-0.00158516	0.00510014	-0.00203549	0.0045297	-0.00118275	0.0140631	0.000902616	0.000823362	0.00159098	0.00316458	0.00206448	0.00633619	-0.00142749	0.0230151	-0.00166301
583	-0.0015066	0.00525284	-0.00180305	0.00454296	-0.00108305	0.0140132	0.00107835	0.000809682	0.00157426	0.00313682	0.00200349	0.00654144	-0.00125338	0.0231384	-0.00156699
582	-0.00157132	0.00517185	-0.00190048	0.00457135	-0.00117755	0.0139602	0.000959964	0.000849808	0.00155274	0.00320655	0.00204953	0.00645465	-0.00128733	0.0230343	-0.00158291
581	-0.00133031	0.00518501	-0.0018684	0.00473638	-0.00119939	0.0139557	0.00100409	0.000870927	0.00154885	0.0031704	0.00204691	0.00642148	-0.00117495	0.0231657	-0.00158449
580	-0.00133637	0.00517846	-0.00188333	0.00482282	-0.00115113	0.0139796	0.00105273	0.000863304	0.00158315	0.00314664	0.00204947	0.00664141	-0.00115109	0.0229826	-0.00149236
579	-0.00150121	0.0052081	-0.00185642	0.0049271	-0.00113359	0.0140389	0.00103481	0.000907901	0.00159871	0.00318507	0.00213857	0.00657352	-0.0011742	0.0229237	-0.00151824
578	-0.00128735	0.0053404	-0.00190847	0.00506715	-0.000973975	0.0141451	0.0010547	0.000947976	0.00164751	0.00314869	0.00216513	0.00661015	-0.000974888	0.0233613	-0.00168342
577	-0.00107366	0.0053144	-0.00188049	0.00528088	-0.000951801	0.014001	0.00106117	0.0010721	0.0017009	0.00318637	0.00215539	0.00665984	-0.000770859	0.0233114	-0.00162373
576	-0.00116602	0.00530909	-0.00174527	0.00525108	-0.00093755	0.0141352	0.00108125	0.00105581	0.00169717	0.00316414	0.0021296	0.00678805	-0.000764583	0.0232186	-0.00138225
575	-0.00122449	0.00543179	-0.00174751	0.00506092	-0.00102074	0.0140294	0.00116555	0.00104757	0.00171148	0.00320336	0.00211532	0.00678911	-0.000981957	0.0233897	-0.00154988
574	-0.00118216	0.0054937	-0.00170409	0.0051752	-0.000931372	0.0140246	0.00117307	0.00108914	0.00179774	0.00325652	0.00209859	0.00709917	-0.000935984	0.0234117	-0.00163452
573	-0.000898997	0.00561213	-0.00174221	0.00548738	-0.000551987	0.0140997	0.00117989	0.00115936	0.00176304	0.00329093	0.0021718	0.00733454	-0.000456459	0.0235428	-0.00142038
572	-0.000949089	0.00559746	-0.00178131	0.00536566	-0.000569944	0.0140395	0.00127316	0.00120015	0.00171661	0.0032585	0.002092	0.00716851	-0.000513041	0.0234884	-0.00148805
571	-0.000906108	0.00556945	-0.00179681	0.0053363	-0.000697746	0.0140053	0.0013136	0.00116938	0.00167136	0.00320174	0.00200616	0.00703257	-0.000775632	0.0234423	-0.00151236
570	-0.00109192	0.00560899	-0.00185191	0.00533535	-0.000758824	0.0139036	0.00126923	0.00123189	0.00178496	0.00327676	0.00211565	0.00684906	-0.000786305	0.0233216	-0.00145758
569	-0.00114623	0.00567291	-0.00178145	0.00540197	-0.000741262	0.0139739	0.00136605	0.00124364	0.00180842	0.00330729	0.00208852	0.00697123	-0.000513003	0.0234243	-0.00143043
568	-0.000866549	0.00581653	-0.00171221	0.00551203	-0.000564816	0.0140789	0.0014641	0.00127819	0.00184953	0.00327767	0.00207296	0.0073603	-0.000397577	0.023622	-0.00137731
567	-0.00103598	0.00579727	-0.00186868	0.00541217	-0.00075833	0.0138287	0.00146399	0.00135555	0.00195206	0.00334639	0.00212771	0.00726186	-0.000458557	0.0235073	-0.00144339
566	-0.0009165	0.00583522	-0.00168115	0.00552884	-0.000834297	0.0138786	0.00148356	0.00137503	0.00194986	0.00337637	0.00211184	0.00718312	-0.000419	0.0236434	-0.00142107
565	-0.000632607	0.00616065	-0.00159641	0.00574857	-0.000505658	0.0140587	0.0014828	0.00140747	0.00194318	0.00334408	0.00210767	0.00736515	-0.000245543	0.023984	-0.00134958
564	-0.000640924	0.00620419	-0.00183799	0.00579287	-0.000340854	0.0141534	0.00154809	0.00147533	0.0019624	0.00331672	0.00212397	0.00752932	-0.000234694	0.02396	-0.00140553
563	-0.000630509	0.00623236	-0.00183265	0.00596586	-0.000273479	0.0141854	0.00166987	0.00148178	0.0019425	0.00329585	0.00210147	0.00773952	6.79293e-05	0.0238877	-0.00141838
562	-0.000602712	0.00624424	-0.0016191	0.00616228	-0.000168427	0.0141863	0.00162389	0.00152374	0.00199729	0.00329376	0.00212232	0.00781951	0.000145659	0.0240515	-0.00145376
561	-0.000682957	0.00642019	-0.00159666	0.00636147	-0.000112199	0.0142075	0.00175184	0.00164149	0.00211444	0.00342469	0.00219046	0.00783075	0.000168546	0.0240054	-0.00140858
560	-0.000675173	0.0063334	-0.00176547	0.006203	-0.000158943	0.0141909	0.00179407	0.00167063	0.00218313	0.00351328	0.00216637	0.00779227	0.000100043	0.0240316	-0.00154772
559	-0.000710852	0.00617944	-0.00186549	0.00607299	-0.000222933	0.013964	0.00176072	0.00168942	0.00215046	0.00347816	0.00212278	0.00774366	0.000114674	0.024026	-0.00169781
558	-0.000463943	0.0064379	-0.00164208	0.00638983	-0.000136512	0.014094	0.00177079	0.00172382	0.00215728	0.00343001	0.00213602	0.00784796	0.000423791	0.0241054	-0.00145728
557	-0.000224656	0.00667742	-0.0014982	0.0066341	0.00012388	0.0144014	0.00186542	0.00178893	0.00217551	0.00348252	0.00217625	0.00824031	0.000605206	0.0242232	-0.00117307
556	-0.000179416	0.00673157	-0.00150286	0.00663499	0.000190681	0.0143003	0.00198942	0.00186573	0.00220293	0.00349945	0.00217842	0.00833866	0.000591782	0.0242224	-0.00126557
555	-0.000190582	0.00672698	-0.00144255	0.00674911	0.000233862	0.0141874	0.00205041	0.00190425	0.00220367	0.0034201	0.00216209	0.00834799	0.000537158	0.0242825	-0.00135182
554	-6.64243e-05	0.00697856	-0.00120881	0.00697785	0.00049172	0.0144051	0.00202771	0.00193841	0.00222653	0.00344081	0.00217321	0.00877711	0.000845186	0.0245478	-0.00117824
553	-9.48357e-05	0.00706783	-0.00127624	0.00705769	0.000413555	0.0144303	0.00198585	0.00196153	0.00224989	0.00350316	0.00219568	0.00880036	0.000937309	0.0245358	-0.00126411
552	3.7122e-05	0.00702	-0.00139234	0.00720254	0.000276092	0.0142666	0.00213365	0.00205119	0.00237745	0.00359952	0.00221438	0.00876707	0.000922658	0.0243462	-0.00118289
551	0.000148371	0.00725374	-0.00139937	0.0073319	0.000532981	0.0142835	0.00220044	0.00207837	0.00232693	0.0036389	0.00218697	0.00883718	0.00113221	0.0245099	-0.00114543
550	5.33773e-05	0.00719781	-0.0014175	0.00717104	0.000554086	0.0140548	0.00212678	0.0020748	0.00240293	0.00364698	0.00215332	0.00885694	0.00110391	0.0245976	-0.00143196
549	0.000207074	0.00721769	-0.00152402	0.00724644	0.00056448	0.0140253	0.00222417	0.00218782	0.0025319	0.00369545	0.00225329	0.00898282	0.00111756	0.0245959	-0.00152345
548	0.000208084	0.00715883	-0.00159322	0.00735071	0.000639536	0.0141462	0.00226787	0.00224291	0.00261263	0.00373766	0.00230967	0.00904199	0.0011372	0.0245581	-0.00135215
547	0.000109784	0.00725398	-0.00161317	0.00747418	0.000454716	0.0142038	0.00234368	0.00227018	0.00261369	0.00371194	0.00228455	0.00898801	0.00113235	0.0246924	-0.00126227
546	0.000278527	0.00750722	-0.001491	0.00758584	0.00063134	0.01438	0.00240615	0.00227802	0.00258005	0.0036611	0.0022472	0.00922086	0.00135276	0.0248687	-0.00124217
545	0.000261501	0.00740597	-0.00166374	0.00760923	0.000631677	0.0142846	0.00251033	0.00226848	0.00255403	0.00367381	0.00219208	0.00919571	0.00125292	0.0246922	-0.00142778
544	0.00043761	0.00749936	-0.00151212	0.00772519	0.000790006	0.0141659	0.00263195	0.00237218	0.00264684	0.00383763	0.00229962	0.00926497	0.00155077	0.0248103	-0.00132176
543	0.000279141	0.00750026	-0.0014749	0.00776981	0.000901216	0.0143512	0.00266675	0.00241905	0.00271724	0.00378833	0.002316	0.0094604	0.00162145	0.024911	-0.00134399
542	0.000439709	0.00769646	-0.0013491	0.00799336	0.00107994	0.0145616	0.00269076	0.00247534	0.00277328	0.00381318	0.00235255	0.00954318	0.00174189	0.0251668	-0.00118438
541	0.000488295	0.00773301	-0.00122513	0.00811742	0.00117747	0.0144839	0.0026149	0.00252582	0.00279808	0.00384379	0.00237086	0.00954706	0.0018805	0.0251492	-0.00118412
540	0.000735243	0.00775441	-0.00124274	0.00825569	0.00123997	0.0144796	0.00264375	0.00248769	0.00273523	0.00371082	0.00226716	0.0096868	0.00199103	0.0251349	-0.00104759
539	0.0007946	0.0079601	-0.0012473	0.00834567	0.00127715	0.014399	0.00286445	0.00252887	0.00275374	0.00374156	0.00229069	0.00992801	0.00197264	0.0251648	-0.00109612
538	0.00096673	0.00832622	-0.00116096	0.00860599	0.00144354	0.0145823	0.00285649	0.00258983	0.00279388	0.00379949	0.00229798	0.0100532	0.00226154	0.0253057	-0.00102353
537	0.0011915	0.0084339	-0.00100237	0.0086791	0.00163547	0.014806	0.00281376	0.00270282	0.00287129	0.00392909	0.00233826	0.0101436	0.00246202	0.0255071	-0.000804263
536	0.00119247	0.00837199	-0.00108507	0.00872736	0.00140592	0.0146132	0.00287218	0.00277538	0.00299152	0.0040052	0.0024237	0.0101105	0.00244925	0.025453	-0.000984152
535	0.00113147	0.00840022	-0.00104996	0.00887667	0.00149215	0.0145	0.00302828	0.00279582	0.00301151	0.0039456	0.00237591	0.0101341	0.00242292	0.0253853	-0.00102512
534	0.00116608	0.0083627	-0.000948693	0.00886822	0.00160381	0.0143795	0.00297404	0.00285162	0.0030283	0.00393654	0.00238215	0.0100969	0.00227697	0.0254782	-0.000950041
533	0.00110522	0.00848884	-0.000895673	0.00885157	0.00184921	0.0145344	0.00302789	0.00286279	0.00298916	0.00399833	0.00239759	0.0103038	0.0024018	0.0255255	-0.000851957
532	0.00119426	0.00871902	-0.000839067	0.00909292	0.0020612	0.0147403	0.00307267	0.00294542	0.00309659	0.00405919	0.00243327	0.0106413	0.00271177	0.025723	-0.000768645
531	0.00129792	0.00864089	-0.00105721	0.0091224	0.00184581	0.014635	0.00308943	0.00295325	0.00309222	0.00399613	0.00239029	0.0107067	0.00272543	0.0257915	-0.000893512
530	0.00141438	0.00858952	-0.00120053	0.00923686	0.00192138	0.014439	0.00310117	0.0029507	0.00305734	0.0040374	0.0024253	0.0105119	0.00252673	0.025598	-0.000873538
529	0.00148706	0.00865151	-0.00107128	0.00929449	0.00195856	0.0144446	0.00308226	0.00293553	0.00311336	0.00405804	0.00245567	0.0106448	0.00259541	0.0256277	-0.00063435
528	0.00142616	0.00875666	-0.00116515	0.00925675	0.00202513	0.0145115	0.00324086	0.0030604	0.003168	0.00410958	0.00243902	0.0106293	0.0028378	0.0256268	-0.000521418
527	0.00133819	0.00879964	-0.00101549	0.00932706	0.00208349	0.0145237	0.00322588	0.00304008	0.00313803	0.00404766	0.0023807	0.0107827	0.00305603	0.0255881	-0.000635358
526	0.00154586	0.00867475	-0.000962613	0.00948505	0.00211209	0.0145257	0.00321049	0.00306333	0.00314688	0.00401497	0.00244624	0.0108562	0.0031672	0.0257593	-0.000802955
525	0.00167645	0.00878843	-0.000962572	0.00962966	0.00222955	0.0145056	0.00332029	0.00312451	0.0031654	0.00397931	0.00240194	0.0110911	0.0031309	0.0261174	-0.000690203
524	0.00134849	0.00884005	-0.00119671	0.00957816	0.00192195	0.0142734	0.00334719	0.00312877	0.0032107	0.00400094	0.00241343	0.0108672	0.00302573	0.0258848	-0.000866269
523	0.00145378	0.00882375	-0.00124706	0.00953977	0.00191214	0.014256	0.00342598	0.00309585	0.00315159	0.00394257	0.00236951	0.0107846	0.00303391	0.0257108	-0.000920322
522	0.0015072	0.00895662	-0.00119798	0.00956239	0.00201428	0.0143974	0.00349301	0.00315713	0.00319283	0.00403602	0.00241517	0.0110765	0.00314201	0.0259185	-0.000830813
521	0.00180008	0.00907348	-0.00100249	0.00982608	0.00211951	0.014564	0.00337048	0.00317897	0.00318161	0.00409449	0.00241137	0.011041	0.00322008	0.0259337	-0.000767298
520	0.0016286	0.00899771	-0.00103418	0.00981557	0.00216781	0.0145202	0.00339082	0.00315601	0.00325243	0.00403575	0.00244288	0.010952	0.00321966	0.0258216	-0.000757615
519	0.00173327	0.00916841	-0.00102183	0.00986831	0.00226711	0.0145401	0.00345316	0.00316108	0.003251	0.00401904	0.00249161	0.0111599	0.003422	0.0260729	-0.00068345
518	0.00158257	0.0090962	-0.00100049	0.00974756	0.00203008	0.0144853	0.00346128	0.00319433	0.00319852	0.00403387	0.00245784	0.0113015	0.00342957	0.0259649	-0.000701466
517	0.00154281	0.00900664	-0.00107948	0.0096883	0.00212048	0.0144112	0.00354201	0.00327843	0.00333244	0.00410782	0.00246599	0.0110941	0.0032981	0.0257944	-0.000912677
516	0.00143806	0.00898753	-0.0012467	0.0096457	0.00223216	0.0142599	0.00358609	0.00326653	0.00327286	0.00404476	0.00233426	0.0111043	0.00319182	0.0258455	-0.00112229
515	0.00162769	0.0091341	-0.00105097	0.00992927	0.00251467	0.0144664	0.0036154	0.00330113	0.00323359	0.00409521	0.00242372	0.0113285	0.00343115	0.0261184	-0.00071701
514	0.00163343	0.0090926	-0.000979954	0.00991445	0.00257102	0.0145479	0.00364316	0.00336913	0.00333	0.0041552	0.00255857	0.0113444	0.00343792	0.026057	-0.000740492
513	0.00163064	0.00899947	-0.00103929	0.00987194	0.00249578	0.0144747	0.00360615	0.00333717	0.00333083	0.00410872	0.00249259	0.011342	0.0035617	0.0259606	-0.000778899
512	0.00170005	0.00915503	-0.000938735	0.00991102	0.00236872	0.0145902	0.00364962	0.00340273	0.00348313	0.00419553	0.00253227	0.011482	0.00342816	0.0259452	-0.000624074
511	0.00176024	0.0091749	-0.000957165	0.0098291	0.00219215	0.0145871	0.00360037	0.00330352	0.00339552	0.00421585	0.00249033	0.0113408	0.00328959	0.0258872	-0.00075219
510	0.0016658	0.00925594	-0.000970688	0.00990981	0.00229532	0.0145311	0.00352091	0.00328665	0.00334051	0.00412167	0.00244641	0.011249	0.00362332	0.0261145	-0.000749063
509	0.00170854	0.00929485	-0.000949088	0.00995422	0.00235616	0.0144489	0.0035147	0.00331199	0.00330574	0.00412882	0.00244174	0.0111638	0.00363482	0.0260536	-0.000757497
508	0.00171949	0.0092658	-0.000913886	0.00985489	0.00231122	0.0144024	0.00358842	0.00330905	0.00327461	0.00415416	0.00237069	0.011271	0.0036095	0.026026	-0.000776264
507	0.00172308	0.00912491	-0.000917589	0.0098897	0.00226378	0.0143926	0.0035796	0.00337749	0.0033755	0.00417766	0.00247491	0.0112527	0.00342141	0.025862	-0.000859518
506	0.00187945	0.00926742	-0.000889219	0.0100856	0.00258575	0.0145621	0.00354081	0.00339118	0.00341513	0.00424817	0.00252121	0.0112798	0.0034811	0.0260113	-0.000604217
505	0.00193768	0.00935945	-0.000846867	0.0101981	0.00262091	0.014564	0.00363489	0.00341831	0.0034414	0.00426407	0.0024777	0.0114385	0.00346507	0.0260997	-0.000557889
504	0.00206797	0.00945511	-0.000784383	0.0102791	0.002626	0.0147073	0.00360071	0.00334909	0.00337447	0.00421576	0.0024356	0.0114486	0.00353466	0.0262492	-0.000571171
503	0.00190883	0.00946	-0.000906838	0.010106	0.0025076	0.0145617	0.00363412	0.00335939	0.00340357	0.00429862	0.00249664	0.0114056	0.00359086	0.026254	-0.000634074
502	0.00173505	0.00941045	-0.00077785	0.0100892	0.00268963	0.0147637	0.00366801	0.00337761	0.00342312	0.00422257	0.00255033	0.0114575	0.00360007	0.0262445	-0.000524704
501	0.00184153	0.00930993	-0.000731264	0.0100653	0.00269076	0.0147322	0.00370499	0.00334664	0.00331205	0.00420889	0.00250456	0.0114558	0.00346439	0.0261655	-0.000616986
500	0.00211808	0.00948238	-0.000633637	0.0101592	0.00282891	0.0148592	0.00371148	0.0033732	0.00332982	0.0042715	0.00256141	0.0115894	0.00353874	0.0261513	-0.000366355
499	0.0020115	0.00935997	-0.000745282	0.00995036	0.00272689	0.0146921	0.00371626	0.00333322	0.00334054	0.00423639	0.00248832	0.0114697	0.00351033	0.0262005	-0.000345625
498	0.00172941	0.00918007	-0.000798717	0.00975332	0.00242462	0.0143821	0.00364064	0.003296	0.00328106	0.00424831	0.00248053	0.0111901	0.00345166	0.025966	-0.000669471
497	0.00181374	0.00926004	-0.000797471	0.00993053	0.00246238	0.0144443	0.00358642	0.00322016	0.00320309	0.00418294	0.00240409	0.0113095	0.00342082	0.0257932	-0.000872885
496	0.00182441	0.0092795	-0.000957879	0.00988952	0.00239051	0.0144186	0.00366577	0.00327643	0.00328772	0.00417275	0.00248785	0.0112269	0.00342749	0.0258926	-0.000855699
495	0.00180657	0.00927855	-0.000950514	0.00986782	0.00227718	0.0145676	0.00363633	0.00326577	0.00329446	0.00417217	0.00251353	0.0111634	0.00349882	0.0261497	-0.000649694
494	0.00180106	0.00920233	-0.000947802	0.00990108	0.00237202	0.014544	0.00356035	0.00334337	0.00337494	0.00427766	0.00258416	0.011193	0.00338726	0.0261886	-0.000609938
493	0.00178976	0.0093754	-0.00093923	0.00987299	0.00236218	0.0147146	0.00352168	0.00337068	0.00333692	0.00427897	0.00260987	0.0113339	0.00334742	0.0259719	-0.000670325
492	0.00194579	0.00939869	-0.000828318	0.0100224	0.0024728	0.0147926	0.00355508	0.00327625	0.00321866	0.00413872	0.00247024	0.0112876	0.00349167	0.0260171	-0.000418663
491	0.00187915	0.00933765	-0.000689686	0.0100495	0.00251481	0.0148259	0.00356551	0.00325457	0.00327753	0.00411573	0.00245783	0.0112904	0.00349326	0.026042	-0.00025661
490	0.00179025	0.0091599	-0.000737185	0.00993943	0.00241714	0.014672	0.00362175	0.00327694	0.00330059	0.00422272	0.0025209	0.0110842	0.00329014	0.0259722	-0.000535731
489	0.00180362	0.00905708	-0.000915945	0.00998332	0.00236289	0.0144784	0.00358475	0.00320956	0.00320219	0.00415757	0.00245198	0.0109402	0.00320792	0.0258014	-0.000708851
488	0.00196472	0.00915244	-0.0007945	0.0100675	0.00240045	0.0146851	0.00343551	0.00315916	0.00313396	0.00407755	0.0024124	0.010961	0.00319832	0.0258924	-0.000613698
487	0.00187594	0.00912454	-0.000687549	0.00997933	0.00241475	0.0147568	0.00343008	0.00318399	0.00322702	0.00406834	0.00253371	0.0110829	0.00316587	0.0259525	-0.00063257
486	0.0016989	0.00921535	-0.000732314	0.00979138	0.00214782	0.0146968	0.00347589	0.00310158	0.00319126	0.00410054	0.00252766	0.0110774	0.0031786	0.0258683	-0.000634688
485	0.00165238	0.00911915	-0.000669513	0.00963758	0.00214178	0.0146071	0.00345216	0.00301469	0.00313388	0.00407622	0.00247702	0.0109174	0.00319677	0.0257062	-0.000631321
484	0.0016496	0.00901893	-0.000805412	0.00966142	0.00211739	0.0145228	0.00336128	0.00300103	0.00312263	0.0040272	0.00241892	0.0107611	0.00305104	0.0256921	-0.000626072
483	0.00147924	0.00895969	-0.00096659	0.00956963	0.00200515	0.0145624	0.00324624	0.00302225	0.00316267	0.00409268	0.00244752	0.0106838	0.00291247	0.0255953	-0.000718732
482	0.00159045	0.00894849	-0.00066395	0.00955393	0.00217255	0.0147312	0.00326354	0.0029958	0.00315099	0.00411026	0.00243533	0.0106369	0.0029005	0.025783	-0.00052437
481	0.00173892	0.00914323	-0.000524922	0.00983968	0.00224263	0.0149262	0.00333283	0.00300158	0.00314161	0.0040791	0.00251514	0.0108134	0.0029855	0.0258391	-0.000460736
480	0.00176497	0.00915863	-0.000478653	0.00978761	0.0023602	0.0149274	0.00327325	0.00300948	0.00315079	0.00409874	0.00253669	0.0109093	0.00316604	0.0258254	-0.000435453
479	0.00162393	0.00892382	-0.000669215	0.00936784	0.00223547	0.014736	0.00317043	0.00294667	0.00304714	0.00407954	0.00249987	0.0107359	0.00281965	0.0257534	-0.000683213
478	0.00163834	0.00884223	-0.000738057	0.00936824	0.00207591	0.0147201	0.00312296	0.00289312	0.00297859	0.00402163	0.00247923	0.0104311	0.00265045	0.0258943	-0.000618413
477	0.00153557	0.00883276	-0.000808975	0.00935654	0.00195813	0.0146623	0.00312256	0.00287284	0.00303323	0.00395748	0.00245748	0.0102253	0.00248121	0.0257182	-0.000601999
476	0.00150123	0.00881829	-0.000748963	0.00927222	0.00190497	0.0145379	0.00312216	0.00293576	0.00306229	0.00403539	0.00246719	0.0104811	0.00268153	0.0255913	-0.000588455
475	0.00165424	0.00884985	-0.000834437	0.00914153	0.00195609	0.0147639	0.00312928	0.00289105	0.0030238	0.00399787	0.00246326	0.0103217	0.00257462	0.0255828	-0.000647575
474	0.00160728	0.00869492	-0.00087049	0.00901142	0.00192195	0.0147097	0.00310513	0.00278909	0.00298758	0.00398702	0.00242428	0.0101384	0.00238237	0.0253605	-0.00065488
473	0.00150783	0.00861696	-0.000762825	0.00890157	0.00181229	0.0146278	0.0031044	0.00269754	0.00286832	0.00393426	0.00237671	0.0100956	0.00235624	0.0253264	-0.00070281
472	0.00132186	0.00858786	-0.000773474	0.00890828	0.00163539	0.0146716	0.00311321	0.00274029	0.00298633	0.0039752	0.00246175	0.0101297	0.00224663	0.0254328	-0.000690696
471	0.00131127	0.00859492	-0.000661335	0.00897413	0.0016327	0.0147028	0.00314082	0.00274639	0.00296934	0.00393995	0.00248441	0.010021	0.00227253	0.0255108	-0.000636013
470	0.00142641	0.00865931	-0.000729046	0.00898844	0.00173848	0.0148723	0.0030046	0.00268105	0.00291646	0.0039542	0.0024728	0.0101199	0.00248218	0.0255887	-0.000404646
469	0.00147074	0.00858564	-0.000685194	0.00886292	0.00184631	0.0148631	0.00296933	0.00258536	0.00283419	0.00395951	0.00237375	0.0101304	0.00248206	0.0256448	-0.0004307
468	0.00137635	0.00859122	-0.000756368	0.00874428	0.00167116	0.0146039	0.00299617	0.00257525	0.00276591	0.00382316	0.00235523	0.0100173	0.0022485	0.0255969	-0.000509577
467	0.00146251	0.00853018	-0.000655276	0.00890723	0.00178067	0.0147484	0.00301133	0.00258501	0.00273405	0.00387998	0.00241511	0.0100419	0.00225107	0.0255633	-0.000462298
466	0.00147696	0.00860908	-0.000515122	0.0089294	0.00189752	0.0149596	0.00294617	0.00250689	0.00275091	0.00392487	0.00240757	0.0100043	0.00239419	0.0255834	-0.000348675
465	0.00142046	0.00852786	-0.000531555	0.00882303	0.00174803	0.0148304	0.00291506	0.00255076	0.00280961	0.00402851	0.00250277	0.00996309	0.00217485	0.0255064	-0.000456438
464	0.00134775	0.00838424	-0.000632746	0.0086207	0.00169215	0.014831	0.00280606	0.00247701	0.00274617	0.0038879	0.00246114	0.00995511	0.00209535	0.0255634	-0.000425731
463	0.00109326	0.00831481	-0.000694339	0.00855592	0.00173177	0.0148768	0.00280279	0.00247196	0.0026424	0.00382594	0.00236043	0.00988362	0.00208088	0.0254528	-0.000350001
462	0.00107996	0.00810902	-0.000738116	0.00858655	0.00170491	0.014811	0.00277794	0.00249008	0.00269785	0.00389409	0.00248606	0.0095703	0.00181675	0.0254914	-0.00055389
461	0.00113821	0.00801565	-0.000610215	0.00835807	0.0013432	0.0148752	0.00269893	0.00238959	0.00261475	0.00378817	0.00242032	0.00947642	0.00174319	0.0253609	-0.000680775
460	0.00108293	0.0082	-0.000652644	0.00822263	0.00126676	0.014807	0.00255673	0.00240765	0.00260758	0.00379539	0.00242153	0.00946238	0.00176204	0.0252375	-0.000586556
459	0.00115781	0.00824258	-0.000734274	0.00836522	0.00128735	0.0148095	0.00262084	0.00236332	0.00263721	0.00382048	0.00246132	0.00943191	0.00180809	0.0251697	-0.000362712
458	0.00103486	0.00807418	-0.000607384	0.00822016	0.00134364	0.0148429	0.00272578	0.00225571	0.00250298	0.00375081	0.00240656	0.00949966	0.00172514	0.02518	-0.000534427
457	0.00113183	0.00802137	-0.000601088	0.00807147	0.00124104	0.0147788	0.00267788	0.00219658	0.00255444	0.00379181	0.00241233	0.00935689	0.0017544	0.0253076	-0.000504074
456	0.00144316	0.00837567	-0.000352159	0.00826991	0.00163135	0.0151569	0.00250788	0.00225315	0.00266742	0.00390676	0.00252911	0.00951928	0.00183799	0.0256554	-0.000210915
455	0.00135449	0.0083357	-0.000248137	0.00827332	0.00150739	0.0150866	0.0025545	0.00219877	0.00256785	0.00386947	0.00251066	0.0094769	0.00179956	0.0257838	-0.0002006
454	0.00130428	0.00814618	-0.000234198	0.00832681	0.00157746	0.0150593	0.00262512	0.00210625	0.00255469	0.00377799	0.00246999	0.00938475	0.001829	0.0257241	-0.000150846
453	0.00117036	0.00817753	-0.000361643	0.00835797	0.00160209	0.0151857	0.00259846	0.00208846	0.00256524	0.0037856	0.0024593	0.00929686	0.0018648	0.0255876	-8.87177e-05
452	0.00122463	0.00809615	-0.000525459	0.00828099	0.00143483	0.0152886	0.00254837	0.00213943	0.00257697	0.00387581	0.00246592	0.0093914	0.00179671	0.0258407	-2.34219e-05
451	0.00132948	0.00822724	-0.000121346	0.00835928	0.00166228	0.0156526	0.00245455	0.00207527	0.00253769	0.00389081	0.00244254	0.00957222	0.00181897	0.0259916	0.000341725
450	0.00076124	0.0075799	-0.000677649	0.00760869	0.00097637	0.014912	0.0024376	0.0021016	0.00250755	0.00384977	0.00253965	0.00853697	0.00108578	0.0249819	-0.000740431
449	0.000594475	0.00750655	-0.000558798	0.00754139	0.00117234	0.0151256	0.00245209	0.00208868	0.00243892	0.00386759	0.0024769	0.00872876	0.00128652	0.0249083	-0.000598316
448	0.000657929	0.00768478	-0.000431493	0.00761704	0.00111583	0.0152661	0.00223099	0.00208798	0.00243307	0.00387488	0.00245853	0.00871205	0.00119091	0.0248266	-0.0004738
447	0.00094911	0.00772503	-0.000329647	0.00762386	0.00116986	0.0153365	0.00223534	0.00206871	0.00248191	0.00382557	0.00249522	0.00876632	0.00110793	0.0249585	-0.0003717
446	0.000898919	0.00751241	-0.00037469	0.00750823	0.00102512	0.0152376	0.00229619	0.00196871	0.00241085	0.00380246	0.00248797	0.00866465	0.00107303	0.0248559	-0.000376987
445	0.000671987	0.00746357	-0.000556145	0.00739278	0.000899514	0.015159	0.00231023	0.00189421	0.00233614	0.00379967	0.00240743	0.00847415	0.000997596	0.0248292	-0.000444876
444	0.000602038	0.00761851	-0.000334816	0.0075529	0.00110746	0.0152091	0.0021591	0.00187414	0.00237825	0.0038321	0.00247741	0.00866693	0.0012021	0.0250085	-0.000303296
443	0.00075821	0.00761138	-0.000329648	0.00753835	0.0011468	0.0152533	0.00217536	0.00185352	0.00233603	0.00382179	0.00252794	0.0086777	0.00128102	0.0249031	-0.000343745
442	0.000804341	0.00750031	-0.000409871	0.00754355	0.00118071	0.0152925	0.00216271	0.0018838	0.00227791	0.00376633	0.00248954	0.00849641	0.00132332	0.0247912	-0.000407141
441	0.000648209	0.00751671	-0.000293416	0.00716708	0.00111465	0.0152433	0.00215057	0.00182379	0.00225003	0.00368035	0.00248929	0.00839357	0.00106147	0.0247053	-0.000220538
440	0.00072572	0.00749128	-0.000137759	0.007273	0.00108899	0.015395	0.00216327	0.00183255	0.00229471	0.00374549	0.00258378	0.00848702	0.000942794	0.0247257	-4.435e-05
439	0.000638428	0.00735281	-0.00011901	0.00732218	0.000788225	0.0153428	0.00207757	0.00181712	0.00226788	0.00377833	0.00259404	0.00827689	0.000939248	0.0246918	-0.000309533
438	0.000777217	0.00751783	1.62386e-06	0.00731319	0.000925193	0.0154664	0.00203266	0.00182049	0.00230032	0.00383169	0.00260496	0.00826536	0.00104874	0.0247764	-0.000251423
437	0.00100888	0.00744909	0.00017017	0.00731389	0.00113783	0.015633	0.00203711	0.00178775	0.00230186	0.0037818	0.00263727	0.00839715	0.00095972	0.02486	0.000131681
436	0.00105978	0.00736608	0.000311057	0.00733886	0.00125577	0.0156901	0.00203301	0.00168446	0.00230894	0.0037859	0.00269737	0.00837055	0.000965878	0.0249101	0.000180426
435	0.000923826	0.00742569	0.000299217	0.00706421	0.0011936	0.0156689	0.00200532	0.00165118	0.00228532	0.00388784	0.00266544	0.00821683	0.000977817	0.0247926	0.000107606
434	0.000923074	0.00764918	0.000333806	0.00707698	0.00121764	0.0159016	0.00193358	0.00168078	0.00228711	0.00382002	0.00261029	0.00831719	0.000949702	0.0247422	0.000242019
433	0.00102624	0.00763318	0.000439392	0.00707003	0.00129954	0.015993	0.00188699	0.00174403	0.00234446	0.0038432	0.00270939	0.00837874	0.000932795	0.0247466	0.000361623
432	0.00143628	0.00765039	0.000707327	0.00725431	0.00151385	0.0161321	0.00193096	0.00179531	0.0024342	0.0039521	0.00287824	0.00840889	0.0012353	0.0249694	0.000527437
431	0.00131135	0.00767846	0.00061467	0.00717892	0.00132214	0.016212	0.00201262	0.00174898	0.00234724	0.00400589	0.00290357	0.00832281	0.00103935	0.0248329	0.000449925
430	0.00113571	0.00759778	0.000774425	0.00698286	0.00119663	0.0161259	0.00200155	0.0016812	0.00228548	0.00401939	0.00287297	0.00823243	0.000732967	0.0248467	0.000441095
429	0.00111993	0.00746024	0.000922203	0.00697347	0.00119911	0.0159771	0.00192746	0.00166317	0.00225645	0.00398584	0.00285405	0.00802468	0.000687965	0.024645	0.000402527
428	0.00121354	0.00772334	0.00120105	0.00710473	0.00143245	0.0162345	0.00182264	0.00167149	0.00224152	0.00395331	0.00287249	0.00816598	0.000851106	0.0247472	0.000522507
427	0.00114514	0.00776589	0.00115187	0.00703338	0.00164258	0.0164044	0.00186147	0.00163263	0.00230006	0.00396586	0.00292251	0.00821067	0.000793769	0.0248877	0.000791748
426	0.00116601	0.00776102	0.00113847	0.00681718	0.00145849	0.016507	0.00182201	0.00162999	0.00231484	0.00397383	0.00305321	0.00812496	0.000874847	0.0250937	0.000889315
425	0.00118249	0.00768685	0.00130695	0.00684036	0.00148435	0.0168204	0.00189847	0.001688	0.00234841	0.00406443	0.00313853	0.00806057	0.0007415	0.0250224	0.000867004
424	0.0013577	0.00771616	0.00168673	0.00702839	0.00163682	0.0171375	0.00187672	0.00171943	0.00238775	0.00414463	0.00318346	0.00829788	0.00102646	0.025392	0.00117602
423	0.00142911	0.00762328	0.00182049	0.00699119	0.00166159	0.01727	0.00179883	0.00160212	0.00239146	0.00418409	0.00326577	0.00818212	0.000972135	0.0255737	0.00120493
422	0.00142121	0.00758347	0.00176487	0.00680803	0.00167453	0.0171983	0.00179771	0.00166847	0.002509	0.00422757	0.00333313	0.00802349	0.000930201	0.0255978	0.00118653
421	0.00127123	0.00757086	0.00166386	0.00671838	0.00150026	0.0172093	0.00176571	0.00166801	0.00254885	0.0043029	0.00332593	0.00782562	0.000781612	0.0256727	0.00123664
420	0.00110704	0.0077399	0.00173387	0.00674911	0.0015503	0.0174325	0.00178911	0.00168706	0.00252952	0.00436129	0.00345054	0.00785459	0.000698537	0.0257638	0.00146276
419	0.00125389	0.00776162	0.00183959	0.00680492	0.00181532	0.0177242	0.00181258	0.0016679	0.00254365	0.00433957	0.00351982	0.00790864	0.000707842	0.0256906	0.00166363
418	0.00132412	0.00775752	0.00198557	0.006801	0.00188107	0.0177921	0.00178427	0.00161923	0.00252092	0.00438599	0.0034728	0.00786641	0.000620451	0.0256354	0.00167794
417	0.00141895	0.00778656	0.00225107	0.00686525	0.00189434	0.017802	0.00179079	0.00164915	0.00258755	0.00440384	0.00360071	0.00786975	0.000736412	0.0256898	0.00178341
416	0.00149296	0.00764324	0.00248592	0.00672795	0.00184456	0.0178677	0.001748	0.0016445	0.00256028	0.00444788	0.00365649	0.00780678	0.000748786	0.0256105	0.00191617
415	0.00165668	0.00777116	0.00271709	0.00684601	0.00193518	0.0179922	0.00166526	0.00166314	0.00253594	0.00444081	0.00366091	0.00780824	0.000731323	0.0256722	0.00217385
414	0.00186553	0.00802238	0.00297887	0.00696231	0.00213489	0.01848	0.00163464	0.0016423	0.00259747	0.00454379	0.00375128	0.00803777	0.000979777	0.0259175	0.00243536
413	0.00174608	0.00794159	0.0029815	0.00679889	0.00219678	0.0185884	0.00164352	0.00159728	0.00254136	0.0045597	0.00372812	0.00798592	0.00100457	0.0258701	0.00227293
412	0.00187173	0.00793935	0.0030207	0.0067605	0.00226045	0.018612	0.0015981	0.00158792	0.00256839	0.00460685	0.00383469	0.00817454	0.000912303	0.0258097	0.00243801
411	0.00205675	0.00809681	0.00323657	0.00688503	0.00244983	0.0188597	0.00169562	0.00151886	0.00257649	0.00457964	0.0038306	0.00804183	0.00108891	0.0259429	0.00252651
410	0.00196444	0.00805479	0.0032943	0.00676612	0.00235885	0.0191978	0.00177932	0.0016461	0.00255815	0.00473215	0.00385474	0.00797182	0.000940873	0.0257651	0.00263863
409	0.00206833	0.00810346	0.00356349	0.00673442	0.00246992	0.0193238	0.00176628	0.00165451	0.00257516	0.00475694	0.00392828	0.00796825	0.00111439	0.0259561	0.0028148
408	0.0022279	0.0082018	0.00344533	0.0064964	0.00249544	0.0192202	0.00173837	0.0016207	0.00260573	0.00482058	0.00404714	0.0079798	0.00103072	0.0259808	0.00281846
407	0.00231894	0.00833368	0.00392315	0.00667827	0.00287679	0.0193596	0.00175074	0.00170747	0.00263936	0.00484089	0.00414457	0.00811235	0.000905413	0.0262689	0.00305189
406	0.0023723	0.00840717	0.0042502	0.006884	0.00289831	0.0196056	0.00168512	0.00161814	0.00262769	0.00478079	0.00418847	0.00823429	0.00117493	0.0262654	0.00331396
405	0.00265457	0.00870914	0.00439022	0.00695583	0.00302056	0.0200196	0.0016922	0.00168886	0.00272601	0.00494686	0.00431878	0.00843358	0.00150619	0.0264575	0.00365971
404	0.00249592	0.00874795	0.00453449	0.00691851	0.00308206	0.020396	0.00170623	0.00167746	0.00276786	0.00496642	0.00433209	0.00825842	0.0014943	0.0264393	0.00389642
403	0.00248006	0.00834874	0.00458338	0.00676743	0.00301607	0.0202428	0.00176083	0.001626	0.002816	0.00498547	0.00437708	0.00805739	0.00138541	0.0264054	0.00382433
402	0.00243555	0.00799433	0.00427816	0.00655833	0.00285923	0.0199228	0.0017753	0.00163801	0.0028465	0.00503261	0.00444658	0.00774813	0.0011117	0.0264034	0.00352004
401	0.00242561	0.0080819	0.00442162	0.00646876	0.00277924	0.0200198	0.00176909	0.00166703	0.00282626	0.00512097	0.00451143	0.00769563	0.00113411	0.0264208	0.00360087
400	0.00253213	0.00823061	0.00466645	0.00661207	0.0029509	0.0202927	0.00178586	0.00168482	0.00283416	0.00511456	0.00455547	0.00773528	0.00120392	0.0263969	0.00389656
399	0.00255928	0.00832602	0.00487804	0.00664165	0.00303686	0.0205382	0.00177238	0.00164048	0.00277689	0.00517111	0.0045552	0.00798134	0.00126535	0.0263612	0.00398069
398	0.00253839	0.00858865	0.00509372	0.00675745	0.00317117	0.020829	0.00185326	0.00164989	0.00279654	0.00518896	0.00464642	0.0081488	0.00144006	0.0266215	0.00422945
397	0.00264441	0.00848884	0.00498014	0.00682616	0.00333719	0.0209993	0.00183026	0.00173408	0.00289726	0.00525914	0.00486312	0.00813599	0.00149195	0.0266886	0.00443031
396	0.00278207	0.00868792	0.00517314	0.00694577	0.00353981	0.0211887	0.00173788	0.00173644	0.00286607	0.00534273	0.0048584	0.00842356	0.00173593	0.0268483	0.00456914
395	0.00271284	0.0087251	0.00528983	0.00707007	0.00358608	0.0212566	0.00172924	0.00167862	0.00283723	0.00529577	0.0048076	0.00847649	0.00172508	0.0268536	0.00460246
394	0.00264322	0.0085207	0.0052161	0.00689251	0.0036502	0.0212748	0.00171985	0.00173938	0.00299912	0.0053134	0.00488217	0.00807604	0.00158796	0.0268828	0.00456526
393	0.0027182	0.00857433	0.00517211	0.00690578	0.00376901	0.0213805	0.00176009	0.00183013	0.00306804	0.00541199	0.0049863	0.00801643	0.0016191	0.0268717	0.0046731
392	0.00296814	0.00863086	0.0054518	0.00695696	0.0037743	0.0213438	0.00176037	0.00182412	0.0031242	0.00543044	0.00501432	0.00815872	0.00161882	0.0269726	0.00498127
391	0.00313189	0.00879487	0.00579868	0.00710052	0.00399112	0.0216054	0.00180661	0.00180196	0.00306016	0.00538821	0.00498333	0.00836538	0.00178675	0.0272789	0.00505171
390	0.00302102	0.0088238	0.00583651	0.00703588	0.00396374	0.021743	0.00188008	0.00175581	0.00302996	0.00550568	0.00509823	0.00831382	0.00190972	0.0272539	0.00488521
389	0.0030962	0.00895771	0.00595401	0.00709446	0.0040613	0.0219183	0.00184703	0.00177424	0.0031275	0.00559792	0.0051629	0.00835362	0.0019272	0.0273115	0.00500509
388	0.003183	0.00907876	0.00604491	0.00729597	0.00432552	0.0220589	0.00180368	0.00180754	0.00314819	0.00561562	0.0051476	0.00825413	0.00190246	0.0274357	0.00527765
387	0.00291379	0.00881453	0.00585314	0.00714142	0.00408047	0.0218779	0.00177659	0.0017832	0.00305905	0.00553056	0.00508825	0.0082741	0.00187769	0.0273269	0.00511964
386	0.00295361	0.00886258	0.00587859	0.00706993	0.00402292	0.0218955	0.00184123	0.00184614	0.00308292	0.00554564	0.00516735	0.00835985	0.00180499	0.0272418	0.0050785
385	0.00304082	0.00890438	0.00600825	0.00707545	0.00409132	0.0221197	0.00180845	0.00188307	0.0032077	0.00562887	0.0053222	0.00842192	0.00187638	0.0272931	0.00536166
384	0.00307844	0.00902085	0.00606624	0.00715368	0.00409078	0.0221222	0.00181148	0.00186147	0.00318596	0.0056538	0.0053194	0.00839193	0.00183433	0.0272948	0.005432
383	0.00333475	0.00921949	0.00610718	0.00738152	0.00438271	0.0223139	0.00180943	0.0018689	0.00325866	0.00576493	0.00533464	0.00863339	0.00207241	0.0275338	0.00541688
382	0.00328726	0.00909613	0.00626806	0.00721193	0.00446038	0.0223575	0.00183773	0.00185964	0.0031825	0.0057583	0.00531314	0.00860346	0.00203515	0.0275659	0.00533749
381	0.00318679	0.00888307	0.00610696	0.00706211	0.00429071	0.0221262	0.0017778	0.0019162	0.00328167	0.0057834	0.00534295	0.00838385	0.0016862	0.0274808	0.00540676
380	0.00321121	0.00891077	0.00611278	0.00714469	0.00447205	0.0221263	0.00190152	0.00192912	0.00322525	0.00569863	0.00537928	0.00838844	0.00194096	0.0277352	0.00560556
379	0.00326743	0.00915416	0.0060932	0.00723778	0.00456999	0.0222179	0.00196952	0.00185863	0.00319238	0.00566499	0.0053648	0.00843594	0.00208771	0.027874	0.00557032
378	0.00337348	0.00910361	0.00610688	0.00718587	0.00453566	0.0224399	0.00184748	0.00187305	0.00324993	0.00571681	0.00538342	0.00836229	0.0020848	0.0277318	0.0055588
377	0.00321459	0.00906348	0.00626602	0.00723939	0.00442889	0.0226164	0.00192414	0.00187796	0.00318916	0.00570309	0.00535638	0.00834538	0.00194639	0.027573	0.00542894
376	0.00329696	0.00921161	0.00637357	0.00726336	0.00449301	0.0226462	0.00198326	0.00186766	0.00320113	0.00577439	0.00534872	0.00840375	0.00198078	0.0276942	0.0055037
375	0.00333065	0.00933496	0.00634387	0.00731785	0.00483094	0.0226199	0.00201887	0.00193794	0.00330976	0.00582832	0.00546533	0.00857023	0.00207449	0.0278333	0.00573608
374	0.00347784	0.00945153	0.00649945	0.00733198	0.00481529	0.0227155	0.00206484	0.00191339	0.00321896	0.00584071	0.00542069	0.00871922	0.0022578	0.027747	0.00590207
373	0.00355426	0.00951681	0.00645538	0.00748901	0.00494142	0.0227453	0.00203896	0.00195449	0.00316421	0.00580084	0.00541913	0.00883437	0.00242286	0.0279203	0.00590462
372	0.00354214	0.00948548	0.00637458	0.00767773	0.0049685	0.0226994	0.00204451	0.00192626	0.00324162	0.00578892	0.0054126	0.00878697	0.0026302	0.0279183	0.00581113
371	0.00340438	0.00949646	0.0064647	0.00777922	0.00499633	0.0226067	0.00216801	0.0020632	0.00329907	0.00583406	0.0054626	0.00866586	0.00262172	0.0279023	0.00591513
370	0.00374848	0.0097102	0.00668249	0.00773079	0.00519513	0.0229297	0.00196229	0.00193131	0.00321666	0.00576261	0.00527159	0.0089841	0.00258545	0.0273799	0.00593388
369	0.00411872	0.00972436	0.00680966	0.00793525	0.00535253	0.0230444	0.00200038	0.00194741	0.00326389	0.00587657	0.00534226	0.00921864	0.00268785	0.0276116	0.00609257
368	0.00389537	0.00971822	0.0067892	0.00787502	0.0054013	0.0228674	0.00209458	0.00196197	0.00327824	0.00580488	0.00537908	0.00926714	0.00268401	0.0277286	0.00606386
367	0.00363258	0.00970478	0.00673131	0.00776775	0.00511152	0.0228728	0.00209133	0.00199655	0.00330249	0.00574078	0.00532525	0.00904439	0.00273661	0.0276565	0.00597871
366	0.00372791	0.00982403	0.00663671	0.00779296	0.00528627	0.022863	0.00214937	0.00196145	0.00323802	0.00579609	0.00527845	0.00906106	0.00274833	0.0277299	0.00611935
365	0.00380719	0.00980218	0.00660884	0.00786243	0.00546282	0.0227365	0.00208171	0.00204651	0.00329962	0.00582659	0.00531661	0.00919667	0.00262236	0.0277728	0.00619556
364	0.00357239	0.00975638	0.00640422	0.00767484	0.00540528	0.0227303	0.00210398	0.00205185	0.00329455	0.00583124	0.00529195	0.0089709	0.00265481	0.027671	0.00595972
363	0.00389014	0.00983491	0.00630677	0.00776001	0.00532353	0.0227297	0.00225546	0.00206893	0.00328859	0.00582609	0.0052845	0.00903099	0.00293808	0.0276794	0.00589304
362	0.00393434	0.00994911	0.00624711	0.00792559	0.00519701	0.0227708	0.00230611	0.00207068	0.00336076	0.00579988	0.00527641	0.00905912	0.0028503	0.0278964	0.00591933
361	0.00391064	0.0099839	0.0063234	0.00800793	0.00524617	0.0226176	0.00224687	0.00200597	0.00326361	0.00562306	0.00521789	0.00915706	0.00287526	0.0279193	0.0057908
360	0.00384959	0.0100284	0.00630384	0.00811878	0.00527086	0.0227779	0.00221922	0.00201848	0.00327863	0.00573318	0.00526717	0.00920464	0.00297928	0.027797	0.00579673
359	0.00369417	0.00999391	0.0061574	0.00805159	0.00522752	0.0225943	0.00222345	0.00203992	0.00322226	0.00563534	0.00521493	0.00907108	0.00281365	0.0276838	0.00576157
358	0.0035759	0.00980084	0.00595301	0.00786225	0.00519222	0.0222347	0.00219153	0.0020697	0.0032364	0.00567329	0.0051902	0.00885646	0.00271293	0.0275259	0.00539593
357	0.00355117	0.00971921	0.00585968	0.00774384	0.00499434	0.0221152	0.00230711	0.00208477	0.00321858	0.00558177	0.00510489	0.00892991	0.00269965	0.0275416	0.00535518
356	0.00365794	0.00978021	0.00576801	0.00796262	0.00501643	0.0221268	0.00236555	0.00209049	0.00323952	0.00563821	0.00516487	0.00909585	0.00271773	0.027643	0.00525552
355	0.00352248	0.00984968	0.00597924	0.00833853	0.00524615	0.0223289	0.00229348	0.00213403	0.00324308	0.00562149	0.00508964	0.00932294	0.00299932	0.0279819	0.0054366
354	0.00349017	0.0098565	0.00598433	0.0079672	0.00503999	0.0221165	0.00222121	0.002098	0.00312199	0.00555627	0.00505777	0.00906817	0.00280104	0.0277591	0.00525392
353	0.00361581	0.00985582	0.00575096	0.0079774	0.00516599	0.0219351	0.00220837	0.00215218	0.00317662	0.00555221	0.00510446	0.00914244	0.00269876	0.0277687	0.00530155
352	0.00360003	0.00975249	0.00562435	0.00801724	0.00509087	0.0219886	0.0022049	0.00203705	0.00307924	0.00556386	0.00491914	0.00912198	0.00287857	0.027732	0.00519474
351	0.00360854	0.0100327	0.00566888	0.00830664	0.00539164	0.0222982	0.00227841	0.00205297	0.00309268	0.00548652	0.00490212	0.00920114	0.00327876	0.0277969	0.00517076
350	0.00359483	0.0100661	0.00581507	0.00850979	0.00546958	0.0222729	0.00223743	0.00211285	0.0031893	0.00546732	0.00498532	0.0093267	0.00331893	0.0280992	0.00505842
349	0.00373708	0.0102303	0.0059403	0.0086229	0.00557873	0.0221622	0.00225734	0.00204514	0.00306664	0.00545616	0.00482765	0.00952532	0.00328318	0.0281604	0.00524823
348	0.00375746	0.0102087	0.00570879	0.008609	0.00534511	0.0220187	0.00231526	0.00208326	0.00307504	0.00534586	0.00474753	0.00934686	0.00320159	0.0278243	0.00498463
347	0.00359021	0.0101277	0.00574433	0.00849341	0.00521586	0.0217832	0.00229121	0.00220528	0.00318975	0.00539484	0.00478535	0.00923961	0.00304547	0.027763	0.0048168
346	0.00368849	0.0103067	0.00548772	0.00855544	0.00532954	0.0217195	0.00232557	0.00211192	0.00310198	0.0053402	0.00474481	0.00928587	0.00307307	0.0277299	0.00505902
345	0.00345362	0.0102916	0.00528456	0.00845691	0.00517559	0.0214825	0.00231026	0.00205624	0.00307255	0.00528591	0.00465176	0.00919854	0.00294931	0.0274517	0.00497277
344	0.00340866	0.0102034	0.00536316	0.00864161	0.00500386	0.0213203	0.00223191	0.00203283	0.00302837	0.00523123	0.00458541	0.00918007	0.00309372	0.0275116	0.00474772
343	0.00326359	0.0100307	0.00523382	0.00851848	0.00501075	0.0211802	0.00221097	0.00200871	0.00300308	0.00521771	0.00461951	0.00914342	0.00294438	0.0275843	0.00461442
342	0.00357091	0.0102448	0.00514689	0.00860144	0.00514787	0.0213634	0.00219448	0.00200363	0.00302551	0.00519278	0.00457923	0.00904079	0.00297978	0.0277942	0.00456056
341	0.00370325	0.0104673	0.00530501	0.00875355	0.00524524	0.0214614	0.00228373	0.0020268	0.0030356	0.00521387	0.00452261	0.00925792	0.00287675	0.0275826	0.00452093
340	0.00422502	0.0105628	0.00577927	0.00864011	0.00568485	0.0222292	0.00227513	0.00201927	0.00305643	0.00510385	0.00454507	0.00882998	0.00282626	0.0271734	0.00430479
339	0.00433063	0.0106701	0.00584097	0.00888359	0.00569865	0.022311	0.00230159	0.00204157	0.00299771	0.00514949	0.00447315	0.00881144	0.0030924	0.0273511	0.00438935
338	0.00411989	0.0107683	0.00555543	0.00891042	0.00574665	0.021961	0.00228448	0.00199155	0.00287076	0.0051204	0.00433795	0.00870924	0.00320648	0.0272286	0.00434304
337	0.00432468	0.010647	0.00567176	0.00903536	0.00581855	0.0218375	0.00229576	0.00205566	0.00289323	0.00510565	0.00438524	0.00892247	0.00317975	0.02719	0.00427782
336	0.00434318	0.0109337	0.00591978	0.00926147	0.00591304	0.0220805	0.00226155	0.00202004	0.00291547	0.00508291	0.00434692	0.00910398	0.00325819	0.0274294	0.00443904
335	0.00426261	0.0108495	0.00570453	0.0093388	0.00573205	0.0220098	0.00229876	0.00202765	0.00298094	0.00509493	0.00426327	0.00893116	0.00304997	0.0270601	0.00416089
334	0.00436137	0.0109459	0.00571061	0.00926089	0.00586478	0.0219878	0.00216549	0.00206068	0.00303107	0.00499021	0.00426979	0.00885844	0.00307123	0.0271028	0.00412333
333	0.00441532	0.0110827	0.0058084	0.00947899	0.00599529	0.02226	0.0022107	0.00197932	0.00293997	0.00485036	0.00418936	0.00886695	0.00323696	0.0270781	0.00432282
332	0.00446302	0.0111491	0.00578616	0.00974336	0.00607323	0.0221473	0.0022609	0.00197875	0.00286864	0.0049346	0.00412885	0.00899832	0.00344923	0.0271411	0.00442797
331	0.00452025	0.0111701	0.00561475	0.00961748	0.0060519	0.0220073	0.002231	0.00185845	0.00275218	0.00486604	0.00390025	0.00890944	0.003135	0.0271135	0.00410773
330	0.00469638	0.0115373	0.0057552	0.00977377	0.00610401	0.0220873	0.00212483	0.0017308	0.00248745	0.00464066	0.00366034	0.00893354	0.00329622	0.0272331	0.00411109
329	0.00470361	0.0117995	0.00582849	0.00976906	0.00612207	0.0219295	0.00229397	0.00172547	0.00240084	0.00470938	0.00368365	0.00898513	0.00330464	0.0274008	0.00402358
328	0.00459923	0.0116113	0.00553743	0.00965168	0.00587177	0.0216805	0.00218097	0.00176682	0.00245105	0.00476986	0.00370304	0.00869746	0.00297457	0.0269322	0.00377535
327	0.00456094	0.0114882	0.00539989	0.00960107	0.00572461	0.0214712	0.00214244	0.00169897	0.00227744	0.00468659	0.00364486	0.0086232	0.00300879	0.0265689	0.00375718
326	0.00451459	0.0114116	0.00536489	0.00976427	0.0058615	0.0215775	0.00200606	0.0017347	0.00226681	0.00461894	0.00360355	0.00851927	0.0030372	0.0265069	0.00372625
325	0.00451847	0.0116127	0.00534647	0.0100795	0.00592966	0.0215831	0.00202491	0.00167957	0.00230093	0.00449985	0.00356008	0.00848444	0.00325952	0.0264839	0.00378042
324	0.00453208	0.0118726	0.0054854	0.0101082	0.00583596	0.0214689	0.00201165	0.00155204	0.00219534	0.00444036	0.0034093	0.00849882	0.00316674	0.026657	0.00373282
323	0.00487085	0.0119253	0.00537376	0.0101536	0.00575324	0.0215059	0.00202142	0.00157894	0.00210545	0.0043479	0.00335896	0.00861729	0.00309089	0.0268079	0.00373407
322	0.00494222	0.0119449	0.00528805	0.0101416	0.00583077	0.0214461	0.00188377	0.00151069	0.00206834	0.00427635	0.00325669	0.00856091	0.00320705	0.0268003	0.00377145
321	0.00491645	0.0122333	0.0052522	0.0103921	0.00590424	0.0213785	0.00180067	0.00156499	0.00210754	0.00423543	0.00323994	0.00854277	0.00337853	0.0266549	0.00372837
320	0.00513897	0.0126819	0.00565856	0.0110363	0.0060421	0.0218113	0.00193754	0.00157076	0.00212952	0.00419209	0.00317048	0.00867124	0.00338197	0.0269123	0.00393119
319	0.00523847	0.012739	0.00556131	0.0109451	0.00606101	0.0217078	0.00178568	0.00158687	0.00217985	0.00415136	0.00314364	0.00856352	0.00327836	0.0268732	0.00396025
318	0.00510913	0.0128672	0.00527673	0.0109147	0.00596459	0.0214521	0.00174726	0.00160856	0.00207756	0.00417987	0.00317411	0.00846564	0.00316827	0.0267791	0.00371796
317	0.00534246	0.0129796	0.00537505	0.0111162	0.00603482	0.0215154	0.00175094	0.0016052	0.0019024	0.00414097	0.00297236	0.00870277	0.00315759	0.0266801	0.00361789
316	0.00554933	0.0132911	0.00556405	0.0112855	0.00624516	0.0216422	0.00160511	0.00154118	0.00184479	0.00401022	0.00292795	0.00879358	0.00329632	0.0268704	0.00362031
315	0.00575108	0.013333	0.0055374	0.0114704	0.0062782	0.0216098	0.00151716	0.00152281	0.00193432	0.00394837	0.00302	0.00867467	0.00335346	0.0269618	0.00379103
314	0.00584507	0.0135859	0.0056078	0.0117229	0.00631837	0.021862	0.0015497	0.00142475	0.00185254	0.003899	0.00296054	0.00863274	0.00332691	0.0270371	0.00378483
313	0.00570976	0.0138152	0.0055528	0.0119741	0.00620758	0.0218269	0.00161465	0.00142396	0.0017519	0.00386631	0.00291788	0.00864076	0.0032946	0.0271551	0.00388838
312	0.00588328	0.0140355	0.00556919	0.0119578	0.00639695	0.0216944	0.00152306	0.00134486	0.0017413	0.00377552	0.00271467	0.00870051	0.00347944	0.0271514	0.00410167
311	0.00619059	0.0144656	0.00582146	0.0122982	0.00674816	0.0220064	0.00149369	0.00143075	0.00187794	0.00384309	0.00286656	0.00880823	0.00358897	0.0273675	0.00438224
310	0.00646533	0.0147248	0.00598322	0.0127074	0.00697462	0.0223203	0.00146133	0.00143293	0.00188944	0.00391033	0.00295584	0.00876838	0.00381388	0.0274174	0.00456359
309	0.00671567	0.0150812	0.00627885	0.0131766	0.00712192	0.0225408	0.00139481	0.0014255	0.00179193	0.00372125	0.00289706	0.0090713	0.00409575	0.0276319	0.00496378
308	0.00697593	0.0154112	0.00662363	0.0134194	0.00738289	0.0225911	0.00147283	0.00139724	0.00177258	0.00375794	0.00283211	0.0091261	0.0039078	0.0276786	0.00533101
307	0.00745535	0.0160919	0.00695355	0.0139866	0.00798752	0.0231353	0.00155498	0.00160714	0.00186739	0.00388227	0.00296879	0.00940352	0.00430587	0.0279519	0.00579401
306	0.00780606	0.016583	0.00730856	0.0144472	0.00839608	0.0233972	0.00169395	0.00178353	0.00193165	0.00402869	0.00309937	0.010038	0.00484521	0.0283833	0.00613553
305	0.00826805	0.0170355	0.00765385	0.0149361	0.00865548	0.0236269	0.00179081	0.00186848	0.00214341	0.00415807	0.00328287	0.0102309	0.00502053	0.0285918	0.00653237
304	0.00935969	0.017965	0.00838268	0.0158906	0.00936491	0.0243679	0.00204156	0.00212146	0.00241201	0.00443457	0.00365303	0.0108234	0.00560845	0.0293511	0.00745238
303	0.0101551	0.0189507	0.0091243	0.0166429	0.0101129	0.0251383	0.00229806	0.00230046	0.00273702	0.00457658	0.00385372	0.0114077	0.00629808	0.0300418	0.00825721
302	0.0107844	0.0199258	0.00998007	0.0176537	0.0110962	0.0260457	0.00258391	0.00265967	0.00301218	0.00493365	0.00418001	0.0121212	0.00711935	0.03072	0.00893926
301	0.0119864	0.021263	0.0111316	0.0189748	0.0122063	0.0271359	0.00310972	0.00317868	0.00348548	0.00531668	0.00468556	0.0131702	0.00817062	0.031751	0.0100222
300	0.0135574	0.0227462	0.012453	0.0202294	0.0134864	0.0284622	0.00357686	0.00375244	0.00391651	0.00585198	0.00522209	0.0142513	0.00931573	0.0330966	0.011157
299	0.0153622	0.0244386	0.0142149	0.0219551	0.0152692	0.0302125	0.00415391	0.00430564	0.00442238	0.00646669	0.00582053	0.0155565	0.0109286	0.0345056	0.0126882
298	0.017359	0.0265249	0.0161456	0.0240006	0.0171395	0.0320263	0.00486727	0.00509309	0.00522452	0.00716677	0.00658607	0.0173207	0.0128209	0.0361964	0.0147434
297	0.0194815	0.0287939	0.0182492	0.0262014	0.019409	0.0341463	0.00563268	0.00587583	0.00612458	0.00792957	0.00734898	0.0191639	0.0145357	0.0381954	0.0167789
296	0.021725	0.0312978	0.0204492	0.0286074	0.0218923	0.0366986	0.00665143	0.00689509	0.00709883	0.00897835	0.00843641	0.0215051	0.016691	0.0402086	0.0185022
295	0.0246538	0.0342264	0.0235287	0.0315475	0.0248227	0.0398315	0.00770596	0.00813008	0.00838518	0.0101485	0.00963175	0.0243042	0.0194239	0.0428092	0.0211016
294	0.0280415	0.037859	0.0272154	0.0350949	0.0284182	0.0433691	0.00897396	0.00950759	0.00986758	0.0115935	0.0111597	0.0271668	0.0226353	0.0459417	0.0243544
293	0.0319834	0.0416987	0.0310012	0.038663	0.0322312	0.0470608	0.0105575	0.0110393	0.0113671	0.013292	0.0128543	0.0303555	0.0261105	0.0490417	0.0276152
292	0.0354652	0.0453763	0.0345482	0.0421741	0.0358405	0.0507468	0.0120092	0.01246	0.0126467	0.0146733	0.0142869	0.0337509	0.029454	0.0523399	0.0306544
291	0.0379277	0.0479992	0.037045	0.0449317	0.038533	0.0533542	0.0131998	0.0135693	0.0138332	0.0157481	0.0154087	0.0363101	0.0316747	0.0544289	0.0328005
290	0.040189	0.0503226	0.0392262	0.0471722	0.0410571	0.0555621	0.0141846	0.0145472	0.0148494	0.0167194	0.0164652	0.0382091	0.0337635	0.0563599	0.0346153
289	0.0428772	0.0530161	0.0418556	0.0499856	0.043951	0.0580347	0.0150366	0.0157326	0.0159698	0.0178869	0.0175619	0.0405836	0.0361553	0.0588667	0.0366082
288	0.0458838	0.0561866	0.0450903	0.0530656	0.0470754	0.0610681	0.0162719	0.0168041	0.0170682	0.0190145	0.0187039	0.0431641	0.0388977	0.0616058	0.0391183
287	0.0487229	0.0592936	0.047964	0.0558609	0.0501058	0.0641822	0.0176953	0.0180377	0.0183571	0.0203847	0.0200971	0.0458238	0.0416583	0.0641151	0.0416252
286	0.0512751	0.0618051	0.0507493	0.0583567	0.0528344	0.0668756	0.0189009	0.0192646	0.0196381	0.0217082	0.0214076	0.0481665	0.0439861	0.0664975	0.0439496
285	0.0534794	0.063928	0.0530613	0.0605711	0.0549859	0.069014	0.0198925	0.0202821	0.0206479	0.0228263	0.0225287	0.0499655	0.0459353	0.0683075	0.045771
284	0.0548206	0.0654002	0.0544281	0.0618243	0.0565104	0.0705888	0.0206923	0.021084	0.0214516	0.023718	0.0235753	0.0510685	0.0472528	0.0696174	0.0468476
283	0.0559148	0.0665974	0.0556181	0.0629326	0.0576711	0.0716918	0.0213061	0.0217431	0.0221345	0.0244277	0.0244319	0.0520824	0.0482374	0.0706685	0.047888
282	0.0569493	0.0675178	0.0566432	0.0640492	0.058846	0.0727904	0.0217891	0.022203	0.0225398	0.0249058	0.0249697	0.0531212	0.0492564	0.0714795	0.0485698
281	0.0576161	0.0683374	0.0573091	0.0647091	0.0596349	0.0735427	0.0222554	0.0225057	0.0228746	0.0252303	0.025207	0.0536212	0.0500879	0.0723288	0.0491866
280	0.057797	0.068733	0.0575241	0.0650626	0.059987	0.0738125	0.0226402	0.0226785	0.0232432	0.0256014	0.0256176	0.0537449	0.050362	0.0724178	0.0493141
279	0.057593	0.068607	0.0573757	0.0649279	0.0598131	0.0733751	0.0228343	0.0228665	0.0233348	0.0258265	0.0258562	0.0533909	0.0500341	0.0721647	0.0489708
278	0.0571052	0.0681785	0.0569103	0.0644716	0.0593685	0.0731863	0.0229653	0.022891	0.0233216	0.025971	0.0259408	0.0528787	0.0494534	0.0718125	0.0485366
277	0.0569683	0.0679156	0.0565067	0.0641589	0.05897	0.0729363	0.0230013	0.0228586	0.0233224	0.0259579	0.0259026	0.0529471	0.0491993	0.0715113	0.048325
276	0.0563056	0.0671832	0.055962	0.0635313	0.0582039	0.0721755	0.0228926	0.0227755	0.0233969	0.0259509	0.0259538	0.0523281	0.0487628	0.0707995	0.0477767
275	0.0553857	0.0662665	0.0549618	0.0627663	0.0572995	0.0711356	0.0228062	0.0226569	0.0233089	0.0259053	0.0259394	0.0514834	0.0478188	0.0699269	0.0468244
274	0.0544792	0.0654298	0.0540721	0.0618412	0.0563796	0.0702683	0.022701	0.0223764	0.0230802	0.0255907	0.0257893	0.0505641	0.0469485	0.0692531	0.046143
273	0.0532929	0.064304	0.0530672	0.0606751	0.0553611	0.0692166	0.0225069	0.0220918	0.0227238	0.0253786	0.0254965	0.0496445	0.0459072	0.068293	0.0452653
272	0.052235	0.0632574	0.0519115	0.059509	0.0541497	0.068188	0.0222427	0.0217326	0.0224317	0.0251387	0.0251492	0.0487958	0.0449202	0.0672181	0.0442308
271	0.0509972	0.0621345	0.0507447	0.0584291	0.0528431	0.0670295	0.0219419	0.0212595	0.0220958	0.0247559	0.0247096	0.0475806	0.0438879	0.0663422	0.0432412
270	0.0497649	0.0608619	0.0495632	0.0571594	0.0516051	0.0657804	0.0215875	0.0209311	0.0217295	0.0243408	0.0243193	0.0464719	0.0426494	0.065443	0.0420828
269	0.0487783	0.0597239	0.0484498	0.0558994	0.0505221	0.0646411	0.0211753	0.0205446	0.0213207	0.0238498	0.023855	0.045466	0.0417069	0.0643949	0.0413237
268	0.0474145	0.0581841	0.0468782	0.0542745	0.0490043	0.0632241	0.0207404	0.0200753	0.0208561	0.0233716	0.0234824	0.043903	0.0404637	0.0631367	0.0402676
267	0.0457933	0.0568398	0.0454277	0.052785	0.0474997	0.061869	0.0203317	0.0195523	0.0204714	0.0228971	0.0230052	0.042541	0.0392992	0.0618268	0.0391323
266	0.0444592	0.0557427	0.0444194	0.0516207	0.0464314	0.0607592	0.0200582	0.0190064	0.0199448	0.0223445	0.0224839	0.0416101	0.0381851	0.0608158	0.0384251
265	0.0430885	0.0543961	0.0429478	0.0502049	0.0451589	0.0594604	0.0195513	0.0185422	0.0194373	0.021854	0.0220146	0.0403266	0.0369177	0.0599108	0.0373841
264	0.0416769	0.0528481	0.0415604	0.0487929	0.043787	0.0584595	0.0191142	0.0180028	0.0189634	0.0213596	0.0214289	0.0390802	0.0358108	0.058883	0.0364289
263	0.0404516	0.0515621	0.0405392	0.0475824	0.0424957	0.0573866	0.0186407	0.0175276	0.018519	0.0207521	0.0208093	0.0380296	0.0348605	0.0579841	0.0359929
262	0.0392586	0.0502832	0.0391565	0.0463177	0.0412285	0.0562317	0.0182269	0.0170973	0.0181063	0.0202362	0.0203106	0.0368335	0.0337732	0.0570003	0.0354409
261	0.0384424	0.0495907	0.0386097	0.0454591	0.0406127	0.0556704	0.017869	0.0166301	0.0177461	0.0198573	0.0198885	0.0362861	0.0331002	0.0565201	0.0351583
260	0.0374369	0.0486366	0.0377288	0.0444418	0.0398619	0.0549594	0.0174092	0.0162218	0.0174409	0.0194411	0.019482	0.0353886	0.0324722	0.0558839	0.0350983
259	0.0362831	0.0474348	0.036684	0.0431411	0.0386107	0.0538758	0.016951	0.0157053	0.0170547	0.0189343	0.0189724	0.0343247	0.0313994	0.0552038	0.0346042
258	0.0352286	0.0463118	0.0355699	0.0419282	0.0375779	0.0530349	0.0164191	0.0150704	0.0165426	0.0183977	0.0184918	0.0333733	0.0304951	0.0542692	0.0343521
257	0.034195	0.0452595	0.0345207	0.0407872	0.0367018	0.0523315	0.0159134	0.014505	0.0160454	0.0179798	0.0179927	0.0324231	0.0298337	0.0535708	0.0341715
256	0.0333592	0.0443447	0.0338034	0.0399381	0.0360959	0.0519637	0.0154379	0.013904	0.0155075	0.0174101	0.0175106	0.0318325	0.0292825	0.0534309	0.03447
255	0.0327783	0.0436378	0.0334109	0.0393723	0.0356711	0.0517978	0.0149141	0.0134811	0.0150419	0.0169572	0.0171677	0.0313761	0.0288534	0.053379	0.0350017
254	0.0321003	0.0430156	0.0331992	0.0385597	0.0351966	0.0517102	0.0146306	0.0131329	0.0147444	0.0168093	0.0172412	0.0309495	0.0284195	0.0532041	0.0352742
253	0.0315999	0.0425565	0.0328689	0.0379849	0.0349603	0.0518932	0.0141665	0.0126297	0.0142885	0.0164559	0.0170486	0.0305948	0.0283376	0.0534997	0.0361678
252	0.0310227	0.0416476	0.0323194	0.0372047	0.0346162	0.0519661	0.013639	0.0120258	0.0135779	0.0159605	0.0167988	0.0300794	0.02802	0.0537695	0.03712
251	0.0304484	0.0410217	0.0321203	0.0365348	0.0344047	0.0523579	0.0132027	0.0114451	0.0128879	0.0155148	0.0166293	0.0299021	0.0277648	0.0542159	0.0382416
250	0.0303571	0.0407221	0.032334	0.0359585	0.0344105	0.0533328	0.0126515	0.010858	0.0121747	0.0152437	0.0166113	0.0296488	0.0280988	0.0549526	0.0396677
