# Supplementary material for: Coral anthozoan-specific opsins employ a novel chloride counterion for spectral tuning
Source: eLife. 2025 Sep 1;14:RP105451. doi: 10.7554/eLife.105451 (PMC12401545; doi:10.7554/eLife.105451)
Supplement: Figure 3—figure supplement 4—source data 1. [file elife-105451-fig3-figsupp4-data1.xlsx]

## Sheet: Sheet1
wavelength	A_abs_Antho2a_WT_0_042Cl	A_abs_Antho2a_WT_0_14Cl	A_abs_Antho2a_WT_0_42Cl	A_abs_Antho2a_WT_1_4Cl	A_abs_Antho2a_WT_4_2Cl	A_abs_Antho2a_WT_14Cl	A_abs_Antho2a_WT_42Cl	A_abs_Antho2a_WT_140Cl	A_abs_Antho2a_WT_420Cl	B_abs_Antho2B_E292A_0_042Cl	B_abs_Antho2B_E292A_0_14Cl	B_abs_Antho2B_E292A_0_42Cl	B_abs_Antho2B_E292A_1_4Cl	B_abs_Antho2B_E292A_4_2Cl	B_abs_Antho2B_E292A_14Cl	B_abs_Antho2B_E292A_42Cl	B_abs_Antho2B_E292A_140Cl	B_abs_Antho2B_E292A_420Cl
750	0.00268565	0.00312849	0.00340223	0.00202602	0.00391941	0.00361762	0.00285398	0.00351617	0.00331597	0.00369849	0.00291167	0.00334665	0.0025076	0.00245058	0.0031793	0.00323832	0.00322786	0.00580361
749	0.00260271	0.00313421	0.00338141	0.00211161	0.00400864	0.00365459	0.00291716	0.00360306	0.00336302	0.00369863	0.00289694	0.00335948	0.00241875	0.00250713	0.00327128	0.00315816	0.00322065	0.00575724
748	0.00254516	0.00302201	0.00335649	0.00200481	0.00389769	0.00354863	0.00296184	0.00349401	0.00328008	0.00360346	0.00277108	0.00323669	0.00228651	0.00234703	0.00312425	0.00298227	0.00311257	0.0055733
747	0.00258592	0.00302591	0.00341377	0.001871	0.00386153	0.00355566	0.00287444	0.0034586	0.00327507	0.00358835	0.00276269	0.00326276	0.00233569	0.00247117	0.00314168	0.00311496	0.00311757	0.00553968
746	0.00266775	0.00305677	0.00354915	0.00202339	0.00390038	0.00363282	0.00300079	0.00350981	0.0033259	0.00368365	0.00279213	0.00328442	0.0023465	0.00242401	0.00319214	0.00322805	0.00310845	0.0056392
745	0.00286665	0.00325376	0.00372271	0.00219314	0.00409463	0.00382109	0.00310139	0.00375078	0.00342391	0.00390949	0.00301003	0.00349173	0.0025565	0.00251309	0.00330417	0.00337297	0.00324582	0.00587394
744	0.00270381	0.00325506	0.00359924	0.00203172	0.00400398	0.00381556	0.00295869	0.00371413	0.00340883	0.00378493	0.00301601	0.00339632	0.00255563	0.00257856	0.00329367	0.00327365	0.00329988	0.00590894
743	0.00265388	0.00316003	0.00354503	0.00200735	0.00393734	0.00373263	0.00301055	0.00357582	0.00330446	0.00366919	0.00287213	0.0033656	0.00249602	0.00246577	0.0032706	0.00333121	0.00318626	0.00585132
742	0.00262079	0.00327043	0.0036409	0.00211074	0.00404354	0.00368726	0.0030113	0.00363285	0.00333712	0.00382807	0.00297234	0.00358566	0.00253552	0.00253374	0.00329644	0.0033212	0.00325357	0.00580459
741	0.00255995	0.00322016	0.00353072	0.00207316	0.00394118	0.00370811	0.00289071	0.00364474	0.00335956	0.00375965	0.00278767	0.0035069	0.00253954	0.0025862	0.00315977	0.00332471	0.00317226	0.00572615
740	0.00261208	0.0031788	0.00355109	0.00211381	0.00399947	0.00376767	0.00302846	0.00357388	0.00328571	0.00385997	0.00292114	0.00349304	0.00248135	0.00248095	0.0032527	0.00326854	0.00307717	0.00580394
739	0.00252583	0.00315638	0.0035044	0.00209741	0.00397567	0.00373943	0.00300231	0.00355742	0.00336617	0.00379465	0.002842	0.00340606	0.00249671	0.00246929	0.00316646	0.00322514	0.00326145	0.00577327
738	0.00269474	0.00324079	0.00352578	0.00204683	0.00407467	0.00368902	0.003044	0.00359202	0.00325016	0.00378917	0.0028954	0.00339993	0.00253754	0.00245213	0.00324133	0.00326259	0.00332894	0.00584022
737	0.00283698	0.00332426	0.0035441	0.00202846	0.00412349	0.00371556	0.00312297	0.00367917	0.00324778	0.00380776	0.00306561	0.00341119	0.00251338	0.00256298	0.00333493	0.00327433	0.00326678	0.00582053
736	0.00269163	0.00332412	0.00355784	0.00198519	0.00407467	0.00360457	0.00312275	0.00376644	0.00331066	0.00358516	0.0029367	0.00341339	0.00260622	0.00260214	0.00320923	0.00334665	0.00330901	0.00576348
735	0.00264265	0.00322352	0.00351549	0.00203269	0.00395728	0.00372826	0.00299159	0.0036187	0.00328869	0.00361419	0.0028718	0.00337936	0.00257432	0.00247085	0.00320581	0.00317057	0.00331245	0.00564766
734	0.00261948	0.0031289	0.00348688	0.00211646	0.00396154	0.00373151	0.00291749	0.00349757	0.00329934	0.00372209	0.00294284	0.00333702	0.00249257	0.00250532	0.00316341	0.00313185	0.00326717	0.00566935
733	0.00270216	0.0030763	0.00337601	0.00199573	0.0039417	0.00365415	0.00289368	0.00343753	0.00336326	0.00362444	0.00281813	0.00329917	0.00244367	0.00240528	0.00315466	0.00310639	0.00326417	0.00554636
732	0.00269809	0.00312995	0.00350045	0.00211786	0.00400971	0.0037716	0.00303006	0.00363022	0.00334276	0.00371277	0.00287883	0.00347629	0.00255377	0.00253366	0.00323662	0.00315444	0.0032306	0.00571486
731	0.00264409	0.0030737	0.00337351	0.00210157	0.00403927	0.00369743	0.00297265	0.00361413	0.00321175	0.00370063	0.00279993	0.00344402	0.00245302	0.00248315	0.00325103	0.00311784	0.00328124	0.00571145
730	0.0027085	0.0031692	0.00345992	0.00200761	0.00399011	0.00363331	0.00301689	0.00354596	0.00327794	0.00367028	0.00281112	0.00343857	0.00244942	0.00245624	0.00325179	0.0031678	0.00337175	0.00573383
729	0.00269628	0.00324688	0.00357994	0.00205047	0.00402899	0.00368726	0.00301965	0.00358274	0.0033288	0.00371536	0.00283339	0.00349132	0.00252336	0.00258291	0.00323801	0.00323807	0.00325454	0.00579156
728	0.00264678	0.00314397	0.00345154	0.00210272	0.00411013	0.00370328	0.0030328	0.00348073	0.00329838	0.00371579	0.00283161	0.00347265	0.00257197	0.00269632	0.00322974	0.00320905	0.00311487	0.00575477
727	0.00265298	0.00313399	0.00348191	0.00207603	0.00411721	0.00375444	0.00307104	0.00353185	0.00329672	0.00366857	0.00284638	0.00357216	0.00260337	0.00272083	0.0032237	0.0032572	0.00313298	0.00574751
726	0.00267322	0.00315858	0.00351006	0.00211804	0.00407497	0.00374393	0.00301406	0.00359796	0.00331313	0.00362712	0.00293254	0.00360084	0.00262865	0.00267963	0.00319907	0.00324544	0.00317896	0.00575512
725	0.00277738	0.00334936	0.00348934	0.00220262	0.00420611	0.00377625	0.00299432	0.00371854	0.00338667	0.00374363	0.00296857	0.00356038	0.00264665	0.0027598	0.00332278	0.00337905	0.0032188	0.00588669
724	0.00270387	0.00326548	0.0034012	0.00208793	0.00418168	0.00367542	0.0028791	0.0036308	0.00331461	0.00371368	0.00288259	0.00347635	0.00247177	0.00268575	0.00327188	0.00332344	0.00313569	0.00571401
723	0.00261307	0.00315939	0.00339347	0.00205875	0.00411173	0.00359859	0.0030051	0.00349899	0.00327443	0.00361009	0.00292149	0.00345982	0.00255155	0.00259634	0.00327466	0.00315712	0.00317577	0.0056746
722	0.00269161	0.00323516	0.00344792	0.00206978	0.00409405	0.00369776	0.00301289	0.00357116	0.00335722	0.00362721	0.00292603	0.00355733	0.00260699	0.00264086	0.00323162	0.00315314	0.00319519	0.00572568
721	0.0026454	0.00319169	0.00359104	0.00205009	0.0040026	0.00367364	0.00293711	0.00359225	0.00332687	0.00372363	0.00288461	0.00347384	0.00251716	0.0024622	0.00329262	0.00319893	0.0031389	0.00560898
720	0.00262778	0.00313565	0.00356531	0.00197431	0.00396682	0.00366713	0.00286085	0.00361033	0.00329737	0.00375228	0.00284348	0.00342442	0.00237014	0.00239366	0.00324951	0.00318984	0.00307021	0.00566481
719	0.00272315	0.00318422	0.00349801	0.00209335	0.00405422	0.00376411	0.00298232	0.00377662	0.00340215	0.00373821	0.00294103	0.0035245	0.00252598	0.00255379	0.00329732	0.00330611	0.00317668	0.00577443
718	0.0027	0.00336783	0.00349043	0.00208823	0.00405716	0.00372809	0.00300627	0.00370823	0.00343265	0.00368394	0.00292211	0.00359307	0.00255252	0.00254632	0.00328353	0.00335863	0.00320657	0.00576343
717	0.00270153	0.0033127	0.00350508	0.00207609	0.00410201	0.00371206	0.00294285	0.00366154	0.00330977	0.00371687	0.00291943	0.00354533	0.00252223	0.00261934	0.0033463	0.00334486	0.00318884	0.00577785
716	0.00260341	0.0032898	0.00333887	0.00204815	0.00402944	0.0036851	0.00291061	0.0035709	0.0033329	0.00359892	0.00281901	0.00330812	0.00252116	0.00255898	0.00312473	0.00315718	0.00313844	0.00577221
715	0.00253435	0.00326154	0.0034026	0.00211285	0.00414127	0.00368929	0.00303918	0.00368636	0.00336457	0.00368992	0.00286216	0.00334999	0.00251243	0.00257512	0.00321271	0.00320689	0.00320505	0.00571754
714	0.00249434	0.00315585	0.00336722	0.00200622	0.00404091	0.00356418	0.00305973	0.0036787	0.00330282	0.0036821	0.00294299	0.00341515	0.00240184	0.00261042	0.00331074	0.00322899	0.00319202	0.00557464
713	0.0024783	0.00302189	0.00322451	0.00192316	0.00385579	0.0035181	0.0029733	0.00363771	0.00322977	0.00350118	0.00285321	0.0032588	0.00233668	0.00242146	0.00324775	0.00313767	0.00305832	0.00546224
712	0.00256618	0.00305218	0.00347155	0.00203053	0.00385433	0.00362256	0.00287894	0.00363725	0.00330359	0.0036819	0.0028691	0.00341058	0.00246992	0.00246517	0.00334317	0.00330949	0.00307398	0.00555224
711	0.00269345	0.00316674	0.00359639	0.00212861	0.00402422	0.00367937	0.00306088	0.00370284	0.00336059	0.00389927	0.00299987	0.00355065	0.00261643	0.00258309	0.00338801	0.00333337	0.00326517	0.00576518
710	0.00275002	0.00321732	0.00348635	0.00207566	0.00415541	0.00361338	0.00313742	0.00357496	0.00344005	0.00375848	0.0029678	0.00351547	0.00258383	0.00257217	0.00343559	0.00326794	0.00329063	0.00567401
709	0.00273253	0.00327753	0.00351886	0.00217071	0.00420603	0.00371728	0.00307428	0.00359926	0.00345907	0.00384841	0.00302116	0.00352524	0.00261633	0.00259222	0.00339652	0.00338039	0.00326924	0.0057432
708	0.00272632	0.00325369	0.00366357	0.00225689	0.00410935	0.00372498	0.00296459	0.00362028	0.00344435	0.00383566	0.00289007	0.00338363	0.00261283	0.00246029	0.00331973	0.00332053	0.00329839	0.00577157
707	0.0026965	0.00317899	0.0036785	0.00208241	0.00402832	0.00362332	0.00294347	0.00351947	0.00339011	0.00367923	0.00280454	0.00338548	0.00258428	0.00247466	0.00320458	0.003289	0.00326066	0.00579838
706	0.00265706	0.0032376	0.00360247	0.00215093	0.0041596	0.00362785	0.00309336	0.00355669	0.00345193	0.00373959	0.00283539	0.00347716	0.00257741	0.00256737	0.00327262	0.00327218	0.0032509	0.00583401
705	0.00275019	0.00330971	0.00354276	0.00228216	0.00419441	0.00368261	0.00316931	0.00364777	0.00344873	0.00378565	0.00298572	0.00354996	0.00254922	0.00261897	0.00328365	0.00339148	0.00335651	0.0058178
704	0.0026729	0.00323423	0.0034535	0.00224877	0.00411312	0.00362184	0.00302339	0.00366903	0.00343029	0.00380784	0.00298952	0.00351741	0.00255332	0.00264985	0.00332884	0.0033683	0.0033529	0.00572229
703	0.00266549	0.00325747	0.00347168	0.00225101	0.00419595	0.00361494	0.00300882	0.0037011	0.00345626	0.0037943	0.00288472	0.00352983	0.00253819	0.00255049	0.00341339	0.00329896	0.00320717	0.00574457
702	0.00260117	0.00315638	0.00351153	0.00218176	0.00414832	0.0035855	0.00305559	0.00367042	0.00336176	0.00374272	0.00286158	0.00349256	0.00257713	0.00257858	0.00340737	0.00324025	0.00327027	0.00572712
701	0.00258618	0.00305343	0.00348621	0.00214447	0.00410403	0.0036677	0.0030606	0.00359795	0.00327981	0.00368643	0.00292993	0.00337126	0.00255484	0.00252971	0.00340282	0.0031647	0.00318664	0.00569631
700	0.00267864	0.00312704	0.00347388	0.00213194	0.00405722	0.00374779	0.00306586	0.00354594	0.00330038	0.00375981	0.00283681	0.00338725	0.00252845	0.00256399	0.00334842	0.00313803	0.00318289	0.00568323
699	0.00265274	0.00315876	0.00348686	0.00213543	0.00410743	0.00366669	0.00299302	0.00360021	0.00327699	0.00375365	0.00278235	0.00335247	0.00245322	0.00251764	0.00330052	0.0031657	0.00307998	0.00565929
698	0.0027595	0.00330894	0.00359978	0.0022597	0.0042175	0.00372833	0.0029957	0.0037587	0.00352785	0.0038528	0.0028816	0.00347772	0.00259737	0.00261618	0.00346703	0.00336766	0.00327587	0.00582869
697	0.00269733	0.00320883	0.0036363	0.00211971	0.00404516	0.00356029	0.00294156	0.00362392	0.0034568	0.00371736	0.00278686	0.00345307	0.00249537	0.00261935	0.00331756	0.00338113	0.00321306	0.00574844
696	0.00257248	0.00316963	0.00350104	0.0020595	0.00397094	0.00353787	0.00289521	0.00359355	0.00337521	0.00356039	0.00282127	0.00338841	0.00247093	0.00258454	0.00321751	0.00317447	0.003148	0.00563453
695	0.00263485	0.00315518	0.00340769	0.00211282	0.0039734	0.00373223	0.00305772	0.00363264	0.00347963	0.00367719	0.00290974	0.00335199	0.00263818	0.00261525	0.00327527	0.00320518	0.00323045	0.00575916
694	0.00264216	0.0030589	0.00341371	0.00207356	0.00404238	0.0036359	0.00297849	0.00359244	0.00343716	0.00370239	0.00282204	0.00335793	0.00262649	0.00249218	0.00323185	0.00321918	0.00315854	0.00580116
693	0.00269323	0.00319764	0.00355786	0.00214974	0.00410123	0.00372845	0.00305751	0.00363791	0.00347735	0.00377915	0.00288386	0.00338409	0.00261838	0.0024817	0.00316556	0.00330506	0.00320315	0.00589674
692	0.00282426	0.0032589	0.00363434	0.00221084	0.00421803	0.00390926	0.00326103	0.00381591	0.00357062	0.0040282	0.00310732	0.00347328	0.00272836	0.00262572	0.00340655	0.00343558	0.00331116	0.0060791
691	0.00271905	0.00322107	0.00359148	0.00215113	0.00413644	0.00386239	0.00314037	0.00385536	0.00352585	0.00390668	0.00297061	0.00353525	0.00258448	0.0026318	0.0034502	0.00336111	0.00329771	0.00602324
690	0.0027516	0.00336053	0.00363209	0.00227879	0.00413499	0.00394551	0.00323806	0.00385313	0.00370286	0.00389976	0.00299524	0.00359649	0.00256811	0.00267482	0.00339531	0.0034857	0.00330601	0.00609755
689	0.00264956	0.0033006	0.00361039	0.00219258	0.00415396	0.00393233	0.00315543	0.0038227	0.00369758	0.0039452	0.00302888	0.00356436	0.00256532	0.00269676	0.00349337	0.00357094	0.00330818	0.00614358
688	0.00261859	0.00327985	0.0036603	0.00219799	0.00425414	0.00387973	0.00320603	0.00386105	0.00372491	0.00389511	0.00307861	0.00358018	0.00270252	0.00278819	0.00357018	0.00353805	0.0033421	0.00622364
687	0.00273875	0.00347819	0.00389733	0.002258	0.00445157	0.00403791	0.0032956	0.00405128	0.00378166	0.00397438	0.00325476	0.00368907	0.0028679	0.00286546	0.00353926	0.00362218	0.00354399	0.00628342
686	0.00274825	0.00352397	0.00384191	0.00229732	0.00452103	0.00411022	0.00335648	0.00400819	0.00374758	0.00394518	0.00331131	0.00379998	0.00277714	0.00275059	0.00363425	0.00369169	0.00356947	0.0063558
685	0.00271871	0.00350492	0.0036793	0.00226768	0.00440186	0.00398168	0.00330976	0.0038301	0.00370521	0.00383657	0.00312922	0.00371458	0.00271056	0.00263362	0.00367368	0.00359365	0.00343801	0.00626875
684	0.00268278	0.00337219	0.00375173	0.00218255	0.00434244	0.00386853	0.00317738	0.00383228	0.00377466	0.00373361	0.00310594	0.00362522	0.00266726	0.00263889	0.00355909	0.00353504	0.00344739	0.00610229
683	0.00280363	0.00331899	0.00375286	0.00227459	0.0044611	0.00383807	0.00321714	0.00393324	0.0038468	0.00390311	0.00321202	0.00378602	0.00276265	0.00275532	0.00359494	0.00356443	0.00345722	0.00607573
682	0.00277001	0.00335411	0.00372637	0.00227495	0.00448192	0.00389833	0.00322114	0.00391324	0.00383894	0.00394833	0.00324916	0.00374409	0.00267405	0.00274919	0.00352386	0.0036182	0.0035255	0.0061322
681	0.0026173	0.003314	0.00369138	0.0021474	0.00430015	0.00378723	0.00316054	0.00386595	0.00380653	0.00388616	0.00314248	0.00361571	0.00271236	0.00266633	0.00348593	0.00351163	0.00339915	0.0059754
680	0.0026459	0.00330818	0.00362928	0.00215814	0.00452699	0.00380338	0.00318149	0.00370976	0.00365978	0.00388173	0.0030562	0.00362682	0.00266585	0.00256498	0.00355759	0.00348399	0.00326035	0.00590268
679	0.00259531	0.00327007	0.00353803	0.00215938	0.00430377	0.00377673	0.00313147	0.00373814	0.00344607	0.00386417	0.00300186	0.00354925	0.00255033	0.00247701	0.00347401	0.00336301	0.00325111	0.0059473
678	0.00268375	0.00333758	0.00368697	0.00224028	0.00426301	0.0038601	0.00312823	0.00385262	0.00353471	0.003853	0.00297802	0.00356172	0.00267102	0.00264898	0.00347664	0.00332322	0.00331855	0.00600549
677	0.0027482	0.00335429	0.00374607	0.00221224	0.00440582	0.00387848	0.0031621	0.00381419	0.00365352	0.00380982	0.00303641	0.00359794	0.00277453	0.00282682	0.00348898	0.00341574	0.00334379	0.00603792
676	0.00278532	0.00340333	0.00375824	0.00227661	0.00434409	0.00401647	0.00334656	0.00391244	0.00378256	0.00388602	0.00320119	0.00362597	0.00285341	0.00288225	0.0035545	0.00358068	0.00345888	0.00623085
675	0.00268549	0.00331212	0.00358756	0.00218943	0.0041635	0.00397315	0.00318705	0.00384391	0.00375741	0.00385369	0.00309416	0.00358942	0.00275586	0.00276595	0.00348128	0.00342475	0.00341	0.0060636
674	0.00269924	0.0033303	0.00364149	0.00222692	0.00418162	0.00389105	0.00319562	0.00393649	0.0036831	0.00381422	0.00304704	0.00363704	0.00264158	0.00281286	0.00349848	0.00349798	0.00337674	0.00602172
673	0.00281224	0.00345887	0.00378135	0.00228579	0.00421627	0.00392747	0.00328944	0.00396319	0.00372073	0.0038705	0.00310667	0.00365555	0.0026573	0.0027359	0.00354171	0.00354607	0.00337554	0.0061021
672	0.00282688	0.00333857	0.00369665	0.00228312	0.00421607	0.00386514	0.00312388	0.00382305	0.00369628	0.00383487	0.00307254	0.00358265	0.00263663	0.00268591	0.00350498	0.00349705	0.00323479	0.00606915
671	0.00272541	0.00323918	0.0036618	0.00219242	0.0042034	0.00384899	0.00309124	0.00378936	0.00352602	0.00368434	0.00294844	0.00363209	0.00258686	0.00262376	0.00354154	0.00351772	0.00325385	0.0060337
670	0.00267462	0.00337846	0.00360491	0.0022562	0.00419431	0.0038588	0.00317927	0.00381861	0.00349805	0.00365056	0.00302544	0.00369764	0.00262238	0.00262065	0.00359847	0.00349209	0.00339133	0.0061038
669	0.0025514	0.00342608	0.00358728	0.00234979	0.00429463	0.00393189	0.00318655	0.00396557	0.00361675	0.00384673	0.0030805	0.00359107	0.00275873	0.00267068	0.00364267	0.00348648	0.00339665	0.00620125
668	0.00265099	0.00337334	0.00370453	0.00225438	0.00428853	0.00388319	0.00320071	0.00388204	0.00360514	0.00385759	0.00307737	0.00367002	0.00274103	0.00266536	0.00356845	0.0035023	0.0034496	0.00612369
667	0.00281725	0.0034749	0.00369615	0.00219817	0.00442011	0.00392478	0.00320354	0.00384858	0.00363978	0.00381237	0.00309681	0.00368429	0.00271354	0.00267625	0.00355483	0.00355306	0.00338207	0.00614247
666	0.00279801	0.00336031	0.00366313	0.00226198	0.00437303	0.00393993	0.00314014	0.00374309	0.0037111	0.00375904	0.0030036	0.00361419	0.00271978	0.00265087	0.00358839	0.00351919	0.00328472	0.00613533
665	0.00262881	0.00332133	0.00358384	0.00220537	0.00420482	0.00380065	0.00301805	0.00377383	0.0036996	0.0038119	0.00305393	0.0035596	0.00264548	0.0026066	0.00348805	0.00333796	0.00324744	0.00599142
664	0.00269114	0.00332903	0.00359061	0.00227558	0.00422367	0.00386161	0.00315937	0.00383676	0.00383633	0.00377907	0.00307685	0.00354638	0.00279114	0.00263861	0.00345604	0.00342272	0.00328757	0.00606517
663	0.00267611	0.00332988	0.00365309	0.00228285	0.00428705	0.00399347	0.00328086	0.00379107	0.00372368	0.00376731	0.0029722	0.00356756	0.00284865	0.00258626	0.00340811	0.00349484	0.00336128	0.00614715
662	0.00258869	0.00320366	0.00364448	0.00206532	0.00424903	0.00381894	0.00319132	0.00379209	0.00353649	0.00369227	0.00295442	0.00353675	0.00273319	0.00250043	0.00330447	0.00342087	0.00333209	0.00602906
661	0.00269456	0.00325328	0.00361934	0.00209412	0.00426818	0.00372062	0.00316628	0.00382316	0.00356121	0.00383271	0.00299417	0.00345649	0.00272206	0.00263805	0.0033199	0.00343926	0.00336593	0.00600101
660	0.00269779	0.00329751	0.00370305	0.00209601	0.00442902	0.00389155	0.00315462	0.00381729	0.0036957	0.0037923	0.00306397	0.00362001	0.00270024	0.00271359	0.00353743	0.00350613	0.0033966	0.00598298
659	0.0027079	0.00329204	0.00361718	0.00217526	0.00438624	0.00385477	0.00311115	0.0038278	0.00367092	0.00378784	0.00307155	0.0035859	0.00261614	0.00273394	0.00348786	0.00349976	0.00331912	0.00597487
658	0.00267864	0.00327199	0.00359673	0.002095	0.00431637	0.00386989	0.00316759	0.00384128	0.00367808	0.00376504	0.00301785	0.00353072	0.00258022	0.00268729	0.00337589	0.00342579	0.00332264	0.00605955
657	0.00265912	0.00330909	0.00365919	0.00216673	0.00433173	0.00385793	0.00326282	0.00390561	0.00367178	0.00380188	0.00305818	0.00368441	0.00256078	0.00266761	0.00351547	0.00354872	0.00341068	0.00607906
656	0.00274022	0.00347378	0.00389919	0.00228926	0.00448741	0.00399599	0.00331638	0.00398853	0.00377375	0.00396103	0.00306846	0.00373837	0.00278039	0.00269551	0.00364565	0.00360506	0.00354565	0.00629012
655	0.00271026	0.00353921	0.0038728	0.00235216	0.00438032	0.00389329	0.00327684	0.00393952	0.00374444	0.00393441	0.00303418	0.0036292	0.00283913	0.00268143	0.00353984	0.00351357	0.00350589	0.00620366
654	0.00271305	0.00354238	0.00372884	0.00242971	0.00442267	0.00398089	0.0032817	0.00391761	0.00380017	0.00390632	0.00311809	0.00363399	0.00280137	0.00280042	0.00357557	0.00353609	0.00345627	0.0061499
653	0.00267145	0.00336411	0.00353624	0.00227635	0.00419604	0.00379236	0.00315833	0.00383119	0.003705	0.00382138	0.00302167	0.00350245	0.00268628	0.00274938	0.00347727	0.00340746	0.00341813	0.00596943
652	0.00267108	0.00335558	0.00352185	0.00225673	0.00425133	0.00381398	0.00321519	0.00381238	0.0036925	0.00378333	0.0030413	0.00354162	0.0027057	0.00266888	0.00344985	0.00343609	0.0034169	0.00604323
651	0.00270693	0.00342702	0.00362326	0.00213083	0.00434363	0.00398937	0.00324595	0.00391047	0.00372856	0.00376802	0.00311649	0.0036309	0.00277633	0.00265631	0.00339931	0.00350224	0.00335837	0.00612077
650	0.00273192	0.00344897	0.00370808	0.00222276	0.00430627	0.00403872	0.0031757	0.00391706	0.00383391	0.00385326	0.0031056	0.00370602	0.00276847	0.00275051	0.00347698	0.00351901	0.00334328	0.00605562
649	0.00269656	0.00343538	0.00368057	0.00226974	0.00434266	0.00395365	0.00311913	0.00388805	0.00384071	0.00384421	0.00306541	0.00368037	0.00262111	0.0026783	0.00349346	0.00345124	0.00334737	0.00598448
648	0.0027361	0.00345305	0.00373165	0.00233028	0.00437527	0.00391796	0.00320818	0.00400523	0.00393343	0.00393681	0.00313488	0.00378622	0.00262027	0.0026527	0.00350918	0.00346729	0.00347891	0.00615394
647	0.00272582	0.00352141	0.00374601	0.00228144	0.00439778	0.00394305	0.00328456	0.00406318	0.00392596	0.00392117	0.0030978	0.00367947	0.00268874	0.00269224	0.00358192	0.00351554	0.00352183	0.00615452
646	0.00282584	0.00340646	0.00367875	0.00226334	0.00433159	0.00401738	0.00320936	0.00391108	0.00380725	0.00384249	0.00321988	0.00362238	0.00273628	0.00271489	0.00351536	0.00352857	0.00341294	0.00620038
645	0.00276004	0.00337696	0.00363437	0.00212883	0.0042607	0.00392132	0.00319744	0.00379847	0.00387319	0.00380543	0.00304448	0.00359604	0.00265065	0.00270759	0.003528	0.00343421	0.00330785	0.00614762
644	0.00269421	0.00344293	0.00360548	0.00215119	0.00414753	0.00377664	0.00306482	0.00375425	0.00379697	0.00379963	0.00300902	0.0036233	0.00262891	0.0026558	0.00361179	0.00346475	0.00330812	0.00613866
643	0.0027341	0.00346542	0.00368687	0.00227192	0.00434614	0.00383427	0.00320778	0.00394793	0.00376855	0.00386716	0.00312088	0.00361678	0.00282925	0.00267611	0.003648	0.00356823	0.00341559	0.00619126
642	0.00265243	0.00348873	0.00377177	0.00220185	0.00438228	0.00388787	0.00319693	0.00403592	0.00383814	0.00382216	0.00299808	0.00358879	0.00272911	0.00272034	0.00356371	0.00360069	0.00338559	0.00619172
641	0.00257302	0.00346688	0.00367285	0.00216352	0.00442857	0.00395047	0.00314689	0.00392703	0.00380008	0.00369279	0.00291151	0.00356208	0.00256365	0.00264578	0.00354423	0.00353476	0.00339376	0.00617697
640	0.00257108	0.00346762	0.00370649	0.00216271	0.00428679	0.00393812	0.00313628	0.00388197	0.00374753	0.00371091	0.00306873	0.00351589	0.00260721	0.00264987	0.00358504	0.00356475	0.00344915	0.00607033
639	0.00255601	0.00333237	0.00364316	0.00225218	0.00418067	0.00384179	0.00314331	0.00386151	0.00377445	0.00371013	0.00307188	0.00347326	0.00266272	0.00270834	0.00356437	0.00356477	0.00344457	0.00600107
638	0.00270672	0.00340662	0.00366545	0.00232553	0.00436638	0.00392484	0.00317065	0.00391813	0.00373853	0.0037978	0.00304252	0.00347956	0.00277728	0.00272339	0.00350101	0.00352805	0.0033722	0.00609559
637	0.00279906	0.00348732	0.00363846	0.00235553	0.00438913	0.00402055	0.00340923	0.00401356	0.00385323	0.00396098	0.00308731	0.00364305	0.00286374	0.00279989	0.00360848	0.00358056	0.00353758	0.00624323
636	0.00272818	0.00344463	0.00367984	0.00233432	0.0043352	0.00394813	0.0034251	0.00389202	0.00379249	0.00389426	0.00316389	0.00369453	0.0028166	0.00281215	0.00365323	0.00353342	0.00352608	0.00622022
635	0.00274614	0.00344962	0.00383065	0.00240542	0.00441861	0.00405389	0.00344914	0.00400996	0.00372179	0.00402545	0.00322261	0.00367204	0.00278922	0.00285485	0.00361187	0.00361092	0.00354647	0.00623834
634	0.00269205	0.00347041	0.00365836	0.00235731	0.00438457	0.00392272	0.00332236	0.00393484	0.00374025	0.00395942	0.00309636	0.00359077	0.00265469	0.00274459	0.00353986	0.00354506	0.00347794	0.00620203
633	0.00277057	0.00341955	0.00367048	0.00232931	0.00439016	0.00391781	0.0033266	0.00399223	0.00380749	0.00392138	0.00301243	0.00367606	0.00268161	0.00271208	0.00357127	0.00352217	0.00346803	0.00617432
632	0.00260178	0.00335981	0.00364096	0.00223127	0.00427507	0.00397652	0.00326312	0.00391427	0.00369322	0.00374492	0.00298499	0.00361161	0.0026792	0.00265878	0.00340077	0.00351375	0.00336292	0.00611428
631	0.0025739	0.00345332	0.00366083	0.00234115	0.00426957	0.00396886	0.00329272	0.00396627	0.00378632	0.00370096	0.00317929	0.00362983	0.00282755	0.00273885	0.00358421	0.00362199	0.00346471	0.00610353
630	0.00285513	0.00358512	0.00389418	0.00244941	0.00451992	0.00408731	0.00344531	0.00409032	0.00392963	0.00403396	0.00329407	0.00373869	0.00292117	0.00274057	0.00387723	0.00374408	0.00364309	0.00634901
629	0.00281389	0.00353996	0.0039369	0.00254245	0.00455952	0.00410283	0.00341263	0.00419913	0.00403042	0.00412129	0.00320808	0.00379398	0.00289354	0.00277413	0.0038435	0.00376289	0.00362811	0.00632002
628	0.00269212	0.00343705	0.00379513	0.00229134	0.00444183	0.00395149	0.00327913	0.00408591	0.00399012	0.00396019	0.00309279	0.00369485	0.00272144	0.00278084	0.00375279	0.00367421	0.00343827	0.00620914
627	0.00279187	0.00343584	0.00378899	0.00229195	0.00445997	0.00396357	0.00329715	0.00403913	0.00400141	0.00395455	0.00309843	0.00373939	0.00288663	0.00273321	0.00375836	0.00366131	0.00347291	0.00627671
626	0.00278847	0.00343107	0.00373627	0.00224461	0.00441699	0.0039695	0.00327789	0.00395087	0.00400593	0.00393085	0.00308426	0.00372958	0.0028975	0.00277682	0.00371927	0.00360776	0.00345454	0.00623061
625	0.00278031	0.00343151	0.00373759	0.00226513	0.00447147	0.00394377	0.00331817	0.00407998	0.0039351	0.00393653	0.00309631	0.00366147	0.00284645	0.00280529	0.00367603	0.00363374	0.00351319	0.00623545
624	0.00266999	0.00330956	0.00368198	0.0023144	0.00455912	0.00384401	0.0032822	0.00406346	0.00385921	0.00382358	0.00307121	0.00359419	0.002814	0.00269975	0.00360246	0.00360419	0.00347696	0.00617184
623	0.00265692	0.00333669	0.00376397	0.0022598	0.00451016	0.00394764	0.0031717	0.0040101	0.00374246	0.00379869	0.00314359	0.00364931	0.00284654	0.00263447	0.00367598	0.00361838	0.00347498	0.00617099
622	0.00270792	0.00343917	0.00376311	0.00228938	0.00452109	0.00402898	0.00325568	0.00402315	0.00382319	0.00386114	0.00316499	0.00370766	0.00292434	0.00269303	0.00367503	0.00372105	0.00351664	0.0062984
621	0.0027992	0.00354838	0.00374158	0.00232486	0.00456991	0.00392511	0.00336998	0.0040715	0.0039593	0.00392287	0.00319121	0.00381734	0.00284915	0.00282638	0.00370966	0.00375753	0.00349685	0.00633095
620	0.00268914	0.0033791	0.0036953	0.00248915	0.00433074	0.00386555	0.0032722	0.00397294	0.00390265	0.00384583	0.00310457	0.00363993	0.00284016	0.00285341	0.00370425	0.00376149	0.00349224	0.00620039
619	0.00278745	0.00340799	0.00375975	0.00247796	0.00447036	0.0038934	0.00326691	0.00397465	0.0039738	0.00392014	0.00313278	0.00377022	0.002864	0.00280501	0.00372703	0.00384751	0.00356629	0.00641265
618	0.0027262	0.00355582	0.00383037	0.00245743	0.00459705	0.00404836	0.0033391	0.00404286	0.00402292	0.00396179	0.0031741	0.00386213	0.00285457	0.00287295	0.00386568	0.00384659	0.00358139	0.00650045
617	0.00282048	0.003621	0.00388929	0.0024373	0.00470832	0.00417612	0.00341463	0.00409289	0.00407168	0.00397164	0.00327199	0.00385773	0.0028877	0.00298344	0.00391423	0.00382784	0.00353457	0.00635188
616	0.00284628	0.00352959	0.00383615	0.00238281	0.00463596	0.00412514	0.00341991	0.00412205	0.00406019	0.00395298	0.00320879	0.00366684	0.00289098	0.00289613	0.00383989	0.00384707	0.0036512	0.00632157
615	0.00274691	0.00345574	0.00374009	0.00231068	0.00450414	0.00406499	0.00332848	0.00405782	0.00390739	0.00394257	0.00302035	0.00357465	0.00275227	0.00273271	0.00364951	0.00376223	0.00363411	0.00634601
614	0.00278898	0.00336368	0.00371463	0.00232375	0.00454007	0.00412461	0.00333553	0.00405747	0.0039236	0.00389392	0.00305359	0.00366234	0.00271422	0.00271293	0.00367475	0.00371375	0.00361901	0.00635556
613	0.00274392	0.003409	0.00370123	0.00237006	0.0044624	0.00399286	0.00332497	0.00396438	0.00394114	0.00375325	0.00299562	0.00358437	0.00268939	0.002718	0.00371541	0.00376075	0.0036594	0.00630789
612	0.00267395	0.0034322	0.00368774	0.00231031	0.00443154	0.00394982	0.00326564	0.00390628	0.00390848	0.00376985	0.00296608	0.00350482	0.00263441	0.00270626	0.00374211	0.00364518	0.00357076	0.00627367
611	0.00274847	0.00353553	0.00364759	0.00239956	0.00452916	0.00403646	0.00336114	0.00397374	0.00391595	0.00388293	0.00304232	0.00360358	0.00281828	0.00270155	0.00374003	0.00362904	0.00356309	0.00628986
610	0.00283236	0.00347235	0.00368136	0.00241819	0.00470412	0.00408564	0.0034701	0.00402516	0.00391144	0.00380566	0.00308689	0.00368024	0.00291892	0.00274512	0.00367916	0.00378645	0.00360475	0.00639385
609	0.00282496	0.00340361	0.00375397	0.00236873	0.00463768	0.00401628	0.00342846	0.00410438	0.003938	0.0037665	0.00305301	0.00369228	0.00289635	0.00280842	0.00364612	0.00388347	0.00360053	0.00644857
608	0.00284482	0.00359084	0.00393378	0.00249978	0.00459838	0.00424203	0.00346913	0.00426891	0.00404182	0.00387577	0.00319285	0.00379745	0.00295895	0.00292322	0.00383631	0.00406533	0.00372358	0.00651737
607	0.00290199	0.00360914	0.0039886	0.00247877	0.00455524	0.00436368	0.00342336	0.00420183	0.00410659	0.00389907	0.00324684	0.00377507	0.0029971	0.00294561	0.00388148	0.00398141	0.00381805	0.00647047
606	0.0028127	0.00354727	0.00396732	0.00244858	0.00457821	0.00423518	0.00354126	0.00415559	0.00412516	0.0039061	0.00315258	0.00379907	0.00290215	0.00289918	0.00375825	0.00383163	0.00376377	0.00643557
605	0.0026732	0.0034699	0.00385873	0.00241902	0.0046128	0.00413626	0.00357008	0.00411064	0.00408108	0.00389456	0.00314342	0.00371388	0.00287628	0.00276188	0.00368576	0.00382978	0.00362179	0.00642301
604	0.00282971	0.0035421	0.00394954	0.00244627	0.00465928	0.00420212	0.00361327	0.00421065	0.00412568	0.00391626	0.00322683	0.0038044	0.00297841	0.00291395	0.00391191	0.00402712	0.00373537	0.00642969
603	0.00280349	0.00358154	0.00390467	0.00252239	0.00468521	0.00417479	0.00347481	0.00414139	0.00408322	0.00384534	0.00316306	0.00373987	0.00283937	0.00289397	0.00396526	0.00392666	0.00374882	0.00639036
602	0.00274038	0.00356845	0.00389905	0.00247478	0.00466556	0.00420522	0.00348294	0.00419661	0.00401624	0.00387545	0.00307545	0.00368511	0.00286247	0.00273737	0.00389977	0.00391147	0.00371274	0.00640359
601	0.00293848	0.0037512	0.00410648	0.00264506	0.00483723	0.00440274	0.00362915	0.00430532	0.00425372	0.00409973	0.00319285	0.00396948	0.00309774	0.00289461	0.0040652	0.00412081	0.00395589	0.00667526
600	0.00290823	0.00373856	0.00403491	0.00268389	0.00483618	0.00437679	0.00358295	0.00423569	0.00424537	0.00397938	0.00313112	0.00385286	0.00299198	0.0029367	0.00404146	0.00415903	0.00395629	0.00674552
599	0.00289302	0.00370378	0.00396629	0.00256498	0.00475802	0.00431386	0.00355153	0.00431132	0.00419503	0.00389306	0.00305567	0.00373839	0.00287259	0.00290229	0.00402585	0.00406449	0.00387395	0.00673072
598	0.00284816	0.00378974	0.0038918	0.002685	0.00481423	0.00438485	0.00358061	0.00440917	0.00430354	0.00403489	0.00312981	0.00381681	0.00296539	0.00296846	0.00401891	0.00410007	0.00395556	0.00679352
597	0.00295572	0.00374363	0.00397573	0.00271703	0.00490435	0.00435083	0.00364275	0.00445344	0.00435316	0.00397369	0.00317824	0.00375779	0.00299612	0.00304363	0.00398857	0.00416846	0.00395551	0.00679483
596	0.00287537	0.00361302	0.00395823	0.00257159	0.00480055	0.00431207	0.00361902	0.00433763	0.00426214	0.00388438	0.00311301	0.00362165	0.00284923	0.00293632	0.00380439	0.00401481	0.00384252	0.00674119
595	0.00282988	0.00360304	0.00400499	0.0026414	0.00480504	0.00424519	0.0036759	0.00423576	0.00423459	0.00381277	0.00311403	0.00362243	0.00280854	0.00291848	0.00389475	0.00410286	0.00397731	0.00690377
594	0.00285328	0.00368033	0.0040576	0.00258341	0.00495669	0.00447152	0.00372988	0.00426246	0.00426103	0.00382764	0.00310997	0.00365006	0.00285481	0.00294945	0.00412429	0.00417842	0.00399815	0.00696635
593	0.00281987	0.00365994	0.00395477	0.00263057	0.00497663	0.00451028	0.00366302	0.0044059	0.00435827	0.00386593	0.00298956	0.00368404	0.00287389	0.00294903	0.00398716	0.00427856	0.00408477	0.00696727
592	0.00298229	0.00373544	0.00401733	0.00275906	0.00502059	0.00464713	0.00384058	0.00455756	0.00453814	0.00401883	0.00309142	0.00379905	0.0029382	0.00299655	0.00401417	0.00441096	0.00430295	0.00699108
591	0.00304171	0.0037	0.00399583	0.00268125	0.00500027	0.00452046	0.00388652	0.00453733	0.00445132	0.00389842	0.00305151	0.00371855	0.00279407	0.00285121	0.00392499	0.00428515	0.00419839	0.00687333
590	0.00292987	0.00374046	0.00405596	0.00284125	0.00505597	0.00445066	0.00395993	0.00461491	0.00432282	0.00386371	0.00310045	0.00370587	0.00285867	0.00295064	0.00408712	0.0043859	0.004209	0.00698596
589	0.00296751	0.00391671	0.00424565	0.00297758	0.00529492	0.00464401	0.00391493	0.00473624	0.00451366	0.00397472	0.00325463	0.00381103	0.0030503	0.00310279	0.00426738	0.00452966	0.00438406	0.0071872
588	0.00300932	0.00393756	0.004262	0.00309186	0.00523467	0.00467051	0.00395001	0.00477283	0.00456912	0.00400448	0.00320452	0.00381665	0.00301003	0.00304466	0.00420244	0.00448151	0.00456246	0.0072224
587	0.00313124	0.00389096	0.00438125	0.00322972	0.00535034	0.00483224	0.00415879	0.00484911	0.00472038	0.00417762	0.00326726	0.00392077	0.00313995	0.0031706	0.0043803	0.00460063	0.00463186	0.007433
586	0.00314007	0.00393271	0.00450132	0.00319475	0.005365	0.00486354	0.00414719	0.00473365	0.00477526	0.0041105	0.00327217	0.00390295	0.00306097	0.00307052	0.00436879	0.00470961	0.00458492	0.00742096
585	0.0030923	0.00389529	0.00438218	0.00324051	0.0052752	0.00490508	0.00424711	0.00488924	0.00465461	0.00407089	0.00318094	0.00395051	0.00304971	0.00309667	0.00432884	0.00461236	0.00468991	0.00752027
584	0.00309245	0.00381627	0.00435323	0.00320976	0.00524845	0.00485853	0.00418708	0.00490117	0.00466403	0.00398821	0.00310926	0.00369128	0.00305646	0.00316505	0.00440196	0.00460828	0.00473657	0.00748189
583	0.00308055	0.00391622	0.0043799	0.00317612	0.00531517	0.00507727	0.00434535	0.00494557	0.00469506	0.00393338	0.00319307	0.00365685	0.00314397	0.00316155	0.00450291	0.00474208	0.00467264	0.00746424
582	0.00318103	0.0040677	0.00443989	0.00323675	0.00550375	0.0052687	0.00441134	0.00506265	0.00480125	0.00399753	0.0032352	0.00383855	0.00315886	0.00316414	0.00460893	0.00485295	0.00473627	0.00766634
581	0.00316983	0.0040634	0.00443557	0.00324777	0.00553514	0.00513488	0.00433479	0.00504535	0.00490151	0.00399557	0.00316074	0.00377248	0.00304939	0.00316567	0.00454931	0.00493214	0.0048382	0.00771611
580	0.00314969	0.00412684	0.00453008	0.0032571	0.00561984	0.00505498	0.00434195	0.00507816	0.00516415	0.00395701	0.00313548	0.00368656	0.00304296	0.00318972	0.00451055	0.00494632	0.00493189	0.00780207
579	0.00325471	0.00417406	0.00457684	0.00336061	0.00562714	0.00517538	0.00449319	0.00513351	0.00519011	0.00397431	0.0031156	0.00378545	0.00315472	0.00316052	0.00451078	0.00499531	0.00505756	0.0079585
578	0.00336227	0.00436137	0.00467029	0.00356841	0.00585671	0.00534228	0.00468542	0.00528419	0.00530512	0.0040807	0.00329355	0.00393964	0.0031469	0.00330818	0.004652	0.00519411	0.00519528	0.00810442
577	0.00351373	0.00451424	0.0048324	0.00374003	0.00591715	0.00547041	0.00487378	0.00548676	0.00540644	0.00419425	0.00336989	0.00395579	0.00315626	0.00338944	0.00475423	0.00525473	0.00532129	0.00824189
576	0.00343721	0.00434813	0.00468051	0.0036681	0.00572431	0.00536392	0.00469431	0.0054714	0.00539795	0.00403062	0.00316742	0.00388337	0.00303262	0.00327322	0.00473422	0.00519692	0.00533747	0.008102
575	0.00330159	0.00418938	0.00471769	0.00361534	0.00584495	0.00536487	0.00476471	0.00549326	0.00537837	0.0040103	0.00321077	0.00382096	0.00303312	0.00334398	0.0048189	0.00525562	0.0053928	0.00826022
574	0.00339704	0.00422401	0.0048285	0.00363821	0.0058144	0.00547732	0.00476532	0.00538155	0.00532762	0.00388757	0.00314823	0.00377167	0.00309693	0.00326318	0.00475601	0.00525294	0.00546291	0.0083722
573	0.00345978	0.00436444	0.00491068	0.00367814	0.00587494	0.00558334	0.00484299	0.00551895	0.00541631	0.0039864	0.00315981	0.00384439	0.00307812	0.00324402	0.00478933	0.00527661	0.00559128	0.0083695
572	0.00343279	0.00435684	0.00500455	0.00380398	0.00605414	0.00571855	0.00499174	0.00571803	0.00557009	0.00395681	0.00317125	0.00382714	0.00312835	0.00335744	0.00489436	0.00544946	0.00565775	0.00846959
571	0.00353337	0.00438982	0.00497693	0.0039043	0.00618843	0.00589392	0.00517111	0.0058819	0.00567644	0.00399181	0.00322924	0.00380131	0.00324544	0.00338148	0.00503193	0.00568031	0.00570823	0.00866037
570	0.00361262	0.004557	0.00502009	0.0040006	0.00634377	0.00590763	0.00526546	0.00590149	0.00575102	0.00403885	0.00332362	0.00397361	0.00322873	0.00336667	0.00520824	0.00575848	0.00599506	0.00880305
569	0.00361894	0.00468227	0.00513253	0.0040891	0.00641022	0.00592524	0.00535769	0.00589631	0.00591724	0.00403452	0.00330763	0.00384963	0.00319212	0.0033321	0.00517836	0.00580594	0.00599907	0.00892874
568	0.00364939	0.00466215	0.00530028	0.00418845	0.00651246	0.00605467	0.00546691	0.00604329	0.00597532	0.0039923	0.00328104	0.0038138	0.0032372	0.0033913	0.00533107	0.00589446	0.00603555	0.0089567
567	0.0036972	0.00468716	0.0053207	0.00438662	0.00663644	0.00615689	0.0055265	0.00621995	0.00601454	0.0039942	0.00330553	0.00385817	0.0031667	0.00341822	0.00535386	0.00595249	0.00618542	0.0091105
566	0.00371789	0.00470133	0.00528963	0.00448493	0.0066678	0.00621354	0.00561129	0.00617704	0.00603046	0.00398256	0.00318365	0.00381693	0.00315648	0.00345863	0.0052874	0.00601037	0.00637969	0.00916911
565	0.00375379	0.00487863	0.00548687	0.00456932	0.00687843	0.00645863	0.00579807	0.00635804	0.0062731	0.00422557	0.00328359	0.00385569	0.00326017	0.00357053	0.00549396	0.00623675	0.00658814	0.00938133
564	0.00375618	0.00485006	0.0056392	0.00460171	0.00692094	0.00652755	0.0058726	0.00641083	0.00645987	0.00408253	0.00332852	0.00376343	0.00325997	0.00351595	0.00546275	0.00641374	0.00664144	0.00952975
563	0.00385298	0.00497204	0.00572041	0.00475451	0.00696801	0.00663627	0.00603196	0.00667472	0.00661372	0.00406797	0.00328919	0.00392881	0.00335744	0.00352886	0.00551274	0.00648323	0.00681458	0.00965926
562	0.00387854	0.00492745	0.00574146	0.00483098	0.00700889	0.00681772	0.00605611	0.00679882	0.00662403	0.0040592	0.00316161	0.00392289	0.00331561	0.0035049	0.00557615	0.00648493	0.00678199	0.00976652
561	0.00387425	0.00496994	0.00586835	0.00505898	0.00727312	0.00693794	0.00628591	0.00697977	0.00673496	0.00410385	0.00331822	0.00395465	0.00342933	0.00377895	0.0058244	0.00669277	0.00698373	0.0100311
560	0.00396932	0.00510752	0.00591127	0.00517929	0.00740376	0.00701645	0.00635365	0.00702342	0.00685856	0.00410413	0.00330598	0.00394372	0.00343893	0.00376359	0.00590005	0.00676854	0.00714881	0.0101376
559	0.00395102	0.00518955	0.00594703	0.0052398	0.00750211	0.00721117	0.00648704	0.0071618	0.00701425	0.00410161	0.00325201	0.00391154	0.00353181	0.00372106	0.00591115	0.00687444	0.0072769	0.010355
558	0.00395205	0.00533388	0.00603167	0.00527476	0.00771917	0.00727308	0.00657375	0.00726846	0.00716648	0.00398161	0.00325005	0.00392554	0.00341636	0.00371841	0.00590869	0.00696161	0.00738607	0.0104126
557	0.0040257	0.00531731	0.00611945	0.0053778	0.00780424	0.00727709	0.00655953	0.00729262	0.00710754	0.00395096	0.00321917	0.00389317	0.00333083	0.00367905	0.00587261	0.00699377	0.00745863	0.0102439
556	0.00419772	0.00542446	0.00629022	0.00551391	0.00791765	0.00745169	0.00679852	0.0076083	0.00726812	0.00404837	0.00331777	0.00397512	0.00350549	0.00377392	0.00596277	0.00718492	0.00770628	0.0104299
555	0.00426143	0.00551942	0.00633486	0.00554072	0.00808825	0.00751442	0.0069199	0.00766263	0.00745069	0.00407924	0.00338504	0.00401507	0.00350256	0.00383459	0.00607991	0.00730588	0.00781716	0.0105474
554	0.00445373	0.00570493	0.00654992	0.00574837	0.00828195	0.00775601	0.0073204	0.00789025	0.00776045	0.00418099	0.00354763	0.00407419	0.00369623	0.00399905	0.0062719	0.00763589	0.00808599	0.0109695
553	0.00450014	0.00573075	0.00670276	0.00595802	0.00835486	0.00797473	0.00733424	0.0079329	0.00777233	0.00429861	0.00346404	0.0039864	0.00360888	0.00418526	0.00640852	0.00763696	0.00812304	0.0111585
552	0.00445846	0.00575187	0.00660997	0.00609417	0.00833687	0.00812955	0.00733784	0.00799672	0.00785373	0.00416505	0.00328977	0.00405992	0.00346281	0.00411278	0.0064601	0.0075352	0.00816404	0.0111347
551	0.00446753	0.00576316	0.00668067	0.00617299	0.00850971	0.00814047	0.00738706	0.00813879	0.00794825	0.00413761	0.00332956	0.00402959	0.00344933	0.00408241	0.00651876	0.00763012	0.00830322	0.0112666
550	0.00446884	0.00588236	0.0068088	0.00613529	0.00867881	0.00822218	0.00750833	0.00825934	0.008061	0.00424767	0.00344701	0.00410157	0.00361417	0.00406877	0.00653174	0.00780165	0.00844499	0.0114286
549	0.00459727	0.00596815	0.00697301	0.00627196	0.00882194	0.00838475	0.0077216	0.00846718	0.00815935	0.00435165	0.00334328	0.00415744	0.00357202	0.00404388	0.0066431	0.00791515	0.00862359	0.0116715
548	0.0046571	0.00606479	0.00709707	0.00652819	0.00902273	0.0085261	0.00792915	0.0085694	0.00841491	0.00436614	0.00342786	0.00413838	0.00349247	0.00412497	0.0067211	0.00807386	0.00876966	0.0118397
547	0.0046962	0.00600785	0.00710852	0.00670675	0.00900996	0.00865374	0.00807766	0.00854982	0.00858946	0.00418402	0.00339058	0.00401721	0.00351336	0.00414679	0.00677954	0.00818228	0.00881744	0.0118951
546	0.00477215	0.00607251	0.00720927	0.00679194	0.00914463	0.00884369	0.00824215	0.00866149	0.0086439	0.00422765	0.00334301	0.00407879	0.00358942	0.0041837	0.00685488	0.00831537	0.00912674	0.0120526
545	0.00479772	0.0061227	0.0072582	0.00690366	0.00929459	0.00895309	0.00830341	0.00875215	0.00865347	0.00420615	0.00327249	0.00400529	0.00359879	0.00424884	0.00673698	0.00835742	0.00921104	0.0121874
544	0.00480872	0.00623037	0.00731175	0.00691263	0.0094543	0.00898168	0.00841108	0.00901859	0.00879904	0.00412038	0.0033554	0.0040482	0.00366446	0.00419168	0.0068027	0.00852522	0.00913419	0.0122954
543	0.00483735	0.00626913	0.00730892	0.00690861	0.00950915	0.00892216	0.00839605	0.00900326	0.00892921	0.00404295	0.00328761	0.00397324	0.00347288	0.00406337	0.00691491	0.00860445	0.00919659	0.0123735
542	0.0047129	0.00638222	0.0074174	0.00702895	0.00946465	0.00915444	0.00849257	0.00910329	0.00912635	0.00402165	0.00316161	0.0040089	0.00352207	0.00409298	0.00702393	0.00870806	0.00941403	0.0124877
541	0.00489059	0.00647223	0.00760267	0.00723111	0.00984556	0.00940863	0.00868108	0.00934194	0.00940745	0.00409383	0.00331563	0.00418192	0.00366939	0.0043683	0.00724161	0.00891365	0.00967099	0.0126471
540	0.00495108	0.00655168	0.00779933	0.00736776	0.0100904	0.00949357	0.00890459	0.0095475	0.00941543	0.00410365	0.00339326	0.00416822	0.00369018	0.00436903	0.00735411	0.00899887	0.00984136	0.0128815
539	0.0051136	0.00674857	0.00790856	0.00752041	0.0101523	0.00963036	0.00910207	0.00983086	0.00961516	0.00420821	0.00337801	0.00417732	0.00371298	0.00441972	0.00748198	0.00906756	0.0100512	0.0130795
538	0.00508341	0.00679354	0.00795178	0.00757563	0.0100956	0.00983206	0.00923715	0.0099255	0.0096653	0.00418677	0.00338985	0.00414573	0.00380626	0.00443738	0.00754314	0.00917049	0.010121	0.0132384
537	0.00518696	0.00691237	0.00802242	0.00777326	0.0103082	0.00998663	0.00938751	0.010006	0.00976673	0.00421732	0.00352676	0.0042067	0.00393774	0.00455445	0.00763593	0.00934389	0.0102492	0.0132985
536	0.0052236	0.00696725	0.00813017	0.00792509	0.0105547	0.0102162	0.00952141	0.0101804	0.00995949	0.00428935	0.00349423	0.00428926	0.00397082	0.00458862	0.007664	0.00941646	0.010314	0.0135136
535	0.00537774	0.0069886	0.00817315	0.00805699	0.0107312	0.0102153	0.00963328	0.0103606	0.0101019	0.00437678	0.00341737	0.00434882	0.00393206	0.00463396	0.00761684	0.00958139	0.0105024	0.0136707
534	0.00551106	0.00713673	0.00841371	0.00813931	0.0107995	0.010412	0.0097248	0.0104712	0.0102609	0.00444906	0.00352478	0.00440392	0.00396282	0.00467411	0.00785258	0.00971364	0.0106822	0.0137672
533	0.00537204	0.00704303	0.00829175	0.00800086	0.010701	0.0104196	0.00974351	0.0103035	0.0100915	0.00438715	0.00342262	0.0041304	0.00379167	0.00456629	0.00780751	0.00968578	0.0105917	0.0137625
532	0.00539001	0.00693441	0.00827405	0.00814836	0.0107143	0.0103089	0.00970491	0.0104243	0.0101926	0.00422424	0.00322901	0.00401477	0.00368154	0.00446882	0.00765864	0.00967561	0.01055	0.0137869
531	0.00546372	0.00721115	0.00843815	0.00833641	0.0108798	0.0104791	0.0100097	0.0106127	0.010446	0.00430386	0.00339678	0.0040992	0.00380628	0.00457565	0.00779319	0.00990306	0.0108807	0.0140001
530	0.00559734	0.00734549	0.00856285	0.0084382	0.0111232	0.0107548	0.0102689	0.0107853	0.0106831	0.00433017	0.00365778	0.00416631	0.00393261	0.00466892	0.00811436	0.0100283	0.0110678	0.0142373
529	0.00570621	0.00731531	0.00859761	0.00856713	0.0111551	0.0108559	0.0103048	0.0109865	0.0107558	0.00439768	0.00360126	0.00431744	0.00394247	0.00470963	0.00804571	0.0101372	0.0111644	0.0144009
528	0.00573607	0.00735424	0.0088607	0.00877452	0.0113336	0.0110234	0.0102867	0.0110975	0.0109608	0.0044001	0.00351967	0.00433852	0.00400489	0.00476144	0.00802367	0.0102708	0.0112708	0.0144098
527	0.00580384	0.00745498	0.00895421	0.00886128	0.011553	0.0111609	0.0103883	0.0111372	0.0110697	0.00437648	0.0035717	0.00429295	0.00406122	0.00477089	0.00824084	0.0103338	0.0114377	0.0145836
526	0.00573504	0.00744525	0.00886616	0.00875982	0.0115513	0.0110695	0.0105076	0.0110932	0.0109048	0.00432587	0.00362393	0.00423701	0.00398999	0.00473667	0.00815702	0.0103112	0.0113382	0.0145463
525	0.00568285	0.00748204	0.00884672	0.00891891	0.0115144	0.0112673	0.0104614	0.0112346	0.0109751	0.00433599	0.00351569	0.00422339	0.0040673	0.00479059	0.00818023	0.0102957	0.0113876	0.014617
524	0.00583255	0.00749332	0.00882118	0.00892972	0.01158	0.0113048	0.0105365	0.0112614	0.0111685	0.00429635	0.00350326	0.0043819	0.00403655	0.00478421	0.00822923	0.0104033	0.0115445	0.0146514
523	0.00590687	0.00765122	0.00890829	0.0090059	0.0116457	0.0113465	0.0106027	0.0113129	0.0112635	0.00429481	0.00344119	0.00435044	0.0040185	0.00486574	0.00823966	0.0104647	0.0115996	0.0148604
522	0.00597067	0.0078514	0.00917425	0.00918225	0.0119114	0.0114827	0.0108211	0.0115022	0.0113973	0.00447286	0.00352115	0.00440107	0.00417501	0.00491013	0.00830173	0.0105459	0.0117828	0.0150905
521	0.00600416	0.00778236	0.00922668	0.00925095	0.011874	0.0115206	0.0108933	0.0115978	0.0114784	0.00446616	0.00349368	0.00438685	0.00411197	0.00479989	0.00845065	0.0106818	0.0117873	0.0150436
520	0.00590163	0.00778771	0.00923509	0.00915051	0.0118107	0.0115229	0.0109383	0.0116459	0.0114566	0.00440984	0.00361943	0.00443468	0.00403447	0.00481252	0.00850484	0.010777	0.0117612	0.0151075
519	0.00590363	0.00784014	0.00924309	0.00916484	0.0118507	0.0116157	0.0110448	0.0117084	0.0113891	0.00441406	0.0034757	0.00425131	0.00398692	0.00500283	0.00853024	0.0107271	0.0117691	0.0150499
518	0.00594404	0.00777231	0.00924087	0.00918542	0.0119336	0.0116507	0.0110301	0.011645	0.0113716	0.00429978	0.00348966	0.00412527	0.00387696	0.00484406	0.00837346	0.0107089	0.0117175	0.0150165
517	0.00593485	0.00770739	0.00923594	0.00933358	0.0120568	0.011708	0.0110522	0.0116421	0.0114506	0.00443726	0.00360758	0.00424321	0.00408771	0.00474349	0.00842702	0.0108038	0.0118174	0.0150905
516	0.00613036	0.00790589	0.00945135	0.00947325	0.0123324	0.0118389	0.0111593	0.0118221	0.0117317	0.00452627	0.00371748	0.00440786	0.00420328	0.00492971	0.00863449	0.0109478	0.012111	0.0153497
515	0.00613935	0.00808008	0.00961689	0.00953556	0.0123229	0.0119416	0.0112783	0.0118744	0.0119873	0.00443882	0.00370891	0.00446783	0.00410502	0.00502966	0.00859717	0.010959	0.0121153	0.0153856
514	0.00613615	0.00810267	0.00952103	0.00955407	0.0122931	0.0119886	0.0112967	0.0120071	0.0119822	0.00438459	0.00371201	0.00435371	0.00413216	0.00496313	0.00856097	0.0109662	0.0121629	0.0153057
513	0.00620409	0.00794442	0.00950321	0.00942397	0.0123118	0.0120857	0.0112371	0.012054	0.0117945	0.00434646	0.0036591	0.00432496	0.00416602	0.00488962	0.00851415	0.0110127	0.0120805	0.0152995
512	0.0063239	0.00801803	0.00961361	0.00953552	0.0123743	0.0121558	0.0114001	0.012146	0.0119435	0.00457684	0.00361318	0.00439982	0.00428319	0.00496622	0.00866366	0.011151	0.0121457	0.0154338
511	0.00637456	0.00813884	0.00962773	0.00973174	0.0124453	0.0121776	0.0115129	0.0122549	0.0120003	0.00462996	0.00367606	0.00445183	0.00425889	0.0050136	0.00865456	0.0110185	0.0122135	0.0155508
510	0.00627187	0.0080362	0.00961144	0.00975457	0.0124687	0.0121129	0.0114017	0.0120967	0.0119009	0.00453071	0.00353972	0.00445298	0.00407817	0.00509129	0.00860287	0.0110999	0.0122541	0.015373
509	0.00620025	0.00813326	0.00965794	0.0097038	0.0124421	0.0121305	0.0114617	0.0121667	0.0119541	0.00454815	0.00352179	0.00439631	0.00415631	0.00503971	0.00862247	0.0110949	0.0122108	0.0153456
508	0.00623114	0.00805598	0.00965688	0.00976342	0.0125296	0.0121925	0.0114768	0.0121741	0.0119432	0.00443173	0.00360627	0.00443011	0.00415812	0.00506805	0.00862844	0.0110606	0.0122434	0.015373
507	0.00625515	0.0079562	0.00968306	0.00965573	0.0125223	0.0121323	0.0114574	0.0121567	0.0120888	0.00442508	0.00361417	0.00436708	0.00415299	0.00505262	0.00876984	0.0110789	0.0121922	0.0153372
506	0.00639153	0.00809364	0.00980358	0.00976585	0.0126024	0.0121791	0.0115301	0.0121288	0.01209	0.00448254	0.00363009	0.00435199	0.00421623	0.00511087	0.00878595	0.0112197	0.0122064	0.0154253
505	0.00639624	0.00804507	0.0097172	0.00980243	0.0124564	0.0121844	0.0115501	0.0121138	0.0119492	0.00452055	0.00361291	0.00435619	0.00408858	0.00501758	0.00865465	0.0111447	0.0121694	0.0153727
504	0.00642859	0.00802173	0.00966309	0.00981054	0.0124187	0.012205	0.0116405	0.0122208	0.0120598	0.00451693	0.00361516	0.00431758	0.00408156	0.00495652	0.00876499	0.011036	0.0121196	0.0153956
503	0.00635922	0.00806167	0.00958812	0.00970392	0.0124779	0.0122683	0.0114972	0.0121959	0.0120879	0.00448314	0.00353985	0.00437398	0.00400048	0.00497056	0.0087511	0.0109795	0.0121312	0.0153809
502	0.00628319	0.00796639	0.00965357	0.00971461	0.0125072	0.0121699	0.0115653	0.0121207	0.0120592	0.00453607	0.00358736	0.00442689	0.00404463	0.00496875	0.00869452	0.0110137	0.012118	0.0152767
501	0.00624355	0.00816137	0.00975914	0.0097598	0.0125574	0.0121151	0.0116024	0.0121251	0.0121363	0.00453714	0.00366539	0.00440786	0.00412834	0.00499461	0.00868367	0.0110902	0.0121485	0.0153404
500	0.0063593	0.00831006	0.00978969	0.00981843	0.0126698	0.012161	0.0115307	0.0122082	0.012202	0.00456476	0.00374375	0.00448208	0.00422381	0.00510576	0.00871997	0.011275	0.0122767	0.0154311
499	0.00652089	0.0081094	0.00968667	0.00976091	0.0125633	0.0123014	0.0114832	0.0121948	0.0120754	0.00452392	0.0037821	0.00444655	0.00417451	0.00510036	0.00868365	0.0112578	0.0121551	0.015464
498	0.0063532	0.00805865	0.00966297	0.0096503	0.0124402	0.0122495	0.0115929	0.0122091	0.0119985	0.00446222	0.00367303	0.0044157	0.00409296	0.00491779	0.00853535	0.0111074	0.0119791	0.0153713
497	0.00636833	0.0081311	0.0097134	0.00971626	0.0126623	0.012246	0.011686	0.0122926	0.0121467	0.0045299	0.00371263	0.00447409	0.00420375	0.00491179	0.00855157	0.0110135	0.011981	0.0153341
496	0.0062703	0.00812951	0.00974223	0.00976676	0.0125189	0.0121666	0.0114474	0.0121839	0.0120537	0.00448945	0.00358877	0.00443579	0.00409419	0.00491243	0.00856885	0.0108265	0.0120119	0.0152234
495	0.00614852	0.00800244	0.00964402	0.00967785	0.0122508	0.0120917	0.0113578	0.0120924	0.0118896	0.0043965	0.00348368	0.00439653	0.00395833	0.00490225	0.00852351	0.0107027	0.0119523	0.015093
494	0.00620045	0.00811207	0.00966098	0.00962378	0.0123996	0.0121967	0.0114294	0.0121668	0.0119521	0.0044671	0.00355289	0.00440709	0.00412971	0.00490309	0.00857881	0.0108149	0.0119229	0.0151138
493	0.00639145	0.00833194	0.009822	0.00989043	0.0126786	0.0123177	0.0116267	0.012301	0.0120699	0.00464685	0.00392843	0.00461181	0.0043584	0.00501776	0.00875369	0.0110316	0.0120043	0.0152164
492	0.00650044	0.0082937	0.00979753	0.00991236	0.0126545	0.0122885	0.011584	0.01228	0.012016	0.00466901	0.00388979	0.00461608	0.00430872	0.00507935	0.00865846	0.0108455	0.0120524	0.0152019
491	0.00654382	0.00829842	0.00979966	0.00981456	0.0126664	0.0122645	0.0115574	0.0122856	0.0120162	0.00462984	0.00388519	0.00463745	0.00430617	0.00519486	0.00863857	0.0109124	0.0120972	0.0152772
490	0.00652418	0.00830649	0.00965849	0.00966523	0.0126409	0.0122207	0.0114439	0.0121984	0.0119826	0.00462798	0.00383564	0.00464708	0.00422949	0.00504777	0.00842636	0.0107751	0.0118765	0.0151958
489	0.00630467	0.00817062	0.00947591	0.00959906	0.0124706	0.0120781	0.0112176	0.0120041	0.0118409	0.00455364	0.00363292	0.00447127	0.00404439	0.00485782	0.00837914	0.0105605	0.011773	0.0151088
488	0.00638096	0.00815973	0.00962142	0.00971967	0.0124005	0.0120562	0.0112499	0.0120356	0.0118692	0.00469072	0.00370493	0.00452938	0.00414859	0.00504144	0.00850275	0.010648	0.0117818	0.0150307
487	0.00647243	0.00808044	0.00958375	0.00955901	0.0123671	0.0119806	0.0112336	0.0119476	0.0118061	0.00468486	0.00379693	0.0044516	0.00422951	0.00505329	0.0084775	0.0106446	0.0116429	0.0148231
486	0.00643202	0.00817038	0.00956927	0.00955617	0.0124331	0.0119664	0.0114124	0.0121217	0.0118272	0.00476493	0.00392196	0.00459327	0.00427519	0.00511948	0.00852304	0.0107149	0.0117232	0.0148305
485	0.00636272	0.00806885	0.00953674	0.00946519	0.0122081	0.0119222	0.0111672	0.011881	0.011706	0.00458399	0.00385613	0.00455853	0.00425961	0.00500366	0.00837426	0.0104874	0.0115798	0.0147059
484	0.00641053	0.00814096	0.00958933	0.00947711	0.0122883	0.0118788	0.0111217	0.0118254	0.0116443	0.00459854	0.00382946	0.00457496	0.00435331	0.00498548	0.00847086	0.0105546	0.0114892	0.0146297
483	0.00647042	0.00817355	0.0095855	0.00958195	0.0123593	0.0119439	0.011247	0.0120206	0.0118147	0.00485222	0.00397051	0.00463434	0.00453134	0.00517597	0.00837556	0.0105583	0.0115075	0.0148096
482	0.00635562	0.00809723	0.00949614	0.00950719	0.0121774	0.0118869	0.0111465	0.0118737	0.0116195	0.00473464	0.0038708	0.00453675	0.00434872	0.00509899	0.00824719	0.0104072	0.0113166	0.0147698
481	0.00638127	0.00812072	0.00955645	0.00945929	0.0120991	0.0117895	0.0111408	0.0118312	0.0115604	0.00472769	0.00389955	0.00460937	0.00443467	0.00501295	0.00823613	0.0103546	0.0112373	0.0146811
480	0.00642966	0.0081364	0.00954067	0.00937655	0.0120651	0.0117608	0.0110617	0.011794	0.0116751	0.00477704	0.00393093	0.00464493	0.00449095	0.00494375	0.0082482	0.0103738	0.0112571	0.0145784
479	0.00643356	0.00807123	0.00937626	0.00926406	0.0120259	0.01172	0.0109706	0.0116236	0.0115235	0.00480219	0.00392432	0.00460349	0.00445383	0.00493923	0.00816802	0.0103266	0.0111459	0.0144327
478	0.00627543	0.00800938	0.00937602	0.009264	0.0119733	0.0116441	0.0108749	0.0115217	0.011378	0.00486612	0.00402432	0.00468118	0.00438135	0.00500231	0.00812061	0.0101417	0.0110864	0.0142687
477	0.00623254	0.00790304	0.00937995	0.00911175	0.0118223	0.0114627	0.010762	0.0115308	0.0112681	0.0049546	0.00394938	0.00471523	0.00430019	0.00498412	0.00814617	0.0101189	0.0109178	0.0142356
476	0.0063233	0.00810898	0.0093793	0.0091712	0.011942	0.0115232	0.0109237	0.0117056	0.0114536	0.00500968	0.00401664	0.00472113	0.00456482	0.00511622	0.00836686	0.0101837	0.010922	0.0142847
475	0.00628707	0.00801173	0.0093014	0.00902224	0.0119026	0.0114557	0.0108518	0.0115971	0.0113961	0.00495765	0.00401091	0.00476015	0.00460713	0.00508151	0.00828167	0.0100203	0.0108755	0.0141264
474	0.0063296	0.00801599	0.00928033	0.00904974	0.0118663	0.0115196	0.0106776	0.0115156	0.011318	0.00500685	0.00404418	0.00479441	0.0045708	0.0051221	0.00817502	0.0100928	0.010861	0.0140608
473	0.00635637	0.00800474	0.00918985	0.00904855	0.0117301	0.0114684	0.0105919	0.0114027	0.0112145	0.00495991	0.00412772	0.00469692	0.0045373	0.00508109	0.00815872	0.0100221	0.0107941	0.0139483
472	0.00637599	0.0078734	0.00913264	0.00898747	0.0115191	0.0114562	0.0105174	0.0112852	0.0111138	0.00488835	0.00405816	0.0046707	0.0045724	0.00505432	0.00807276	0.00981099	0.0106092	0.013954
471	0.00630148	0.00779591	0.00910911	0.00887082	0.0114868	0.0112158	0.0105147	0.0111794	0.0110246	0.00478506	0.00401905	0.00472098	0.00462356	0.00500097	0.00798428	0.0096311	0.0105559	0.0138806
470	0.00623189	0.00774736	0.00902719	0.00871055	0.011384	0.0110707	0.01053	0.0111266	0.0109659	0.0048184	0.00413244	0.004799	0.00455039	0.00489479	0.00791199	0.00960534	0.0104808	0.0137732
469	0.00615374	0.00776605	0.00895587	0.0085855	0.0114612	0.0110571	0.0104265	0.0109851	0.0108492	0.00486964	0.00400444	0.00474653	0.00453027	0.00491906	0.00776505	0.00961747	0.010328	0.0136173
468	0.00613753	0.00778054	0.00894372	0.00863468	0.0114896	0.0110894	0.0102589	0.0109652	0.0107958	0.00485634	0.00398431	0.00476154	0.0045298	0.00495632	0.00771787	0.00956156	0.0103084	0.0136461
467	0.00624674	0.00777641	0.00889368	0.0086347	0.0113578	0.0110542	0.010243	0.0109616	0.010889	0.0048877	0.00410135	0.00476087	0.00459587	0.00490396	0.00782634	0.00945996	0.0102017	0.0135383
466	0.00622055	0.00785897	0.00912298	0.0086086	0.0113289	0.0109957	0.0101953	0.0109914	0.0108437	0.00498889	0.00412982	0.00474863	0.00463943	0.00502908	0.00781068	0.00955912	0.0100261	0.0134419
465	0.00614624	0.00764617	0.00897464	0.0085437	0.011117	0.0108821	0.0101381	0.0107731	0.0105924	0.00500548	0.00408874	0.00467987	0.00447009	0.00492698	0.00775593	0.00942988	0.00998684	0.0133451
464	0.00612674	0.00757747	0.00875824	0.00847343	0.0110544	0.0108648	0.0100271	0.0106033	0.010583	0.00496424	0.00413337	0.0047972	0.0043861	0.00487182	0.00770246	0.0091477	0.0099331	0.0132988
463	0.00614013	0.00750702	0.00871031	0.00828796	0.0110201	0.0107205	0.00992779	0.0105964	0.0105314	0.00496287	0.00400228	0.0047524	0.00438517	0.00485551	0.00750974	0.00916226	0.00974213	0.0131565
462	0.00625211	0.0076711	0.00892956	0.00835516	0.0111393	0.0108408	0.0100416	0.0107892	0.0105443	0.00526712	0.00407866	0.00478611	0.0046535	0.00503464	0.00766566	0.00928873	0.00982699	0.0132258
461	0.00615654	0.0076923	0.00891624	0.00836084	0.011125	0.0108146	0.00993993	0.0107188	0.0104591	0.0052531	0.00409437	0.00493735	0.0046595	0.00502346	0.00771988	0.00915728	0.00979084	0.013222
460	0.00610288	0.00758654	0.00878966	0.00824716	0.011096	0.0106418	0.00988954	0.0106273	0.0104637	0.00512938	0.00415469	0.00494035	0.00458648	0.0050258	0.0076153	0.0091516	0.00966778	0.0131081
459	0.00612796	0.00750059	0.00856726	0.00820184	0.0108997	0.0104359	0.00965766	0.0104613	0.0104369	0.00510541	0.00428421	0.00479441	0.00455621	0.00497305	0.00746533	0.00902711	0.00957047	0.0129292
458	0.00608623	0.00761572	0.00851367	0.00817834	0.0107821	0.0104002	0.00953189	0.0104188	0.0102566	0.0051448	0.00427279	0.00488633	0.00463604	0.00483719	0.00741311	0.00900599	0.00957851	0.0128288
457	0.00606633	0.0074821	0.00852972	0.00799773	0.0106578	0.0102889	0.00949128	0.0103806	0.0101094	0.00513045	0.00415689	0.00489977	0.00459555	0.00486123	0.00740076	0.00903153	0.00936391	0.0127951
456	0.00611326	0.00747723	0.00851252	0.00795396	0.0106826	0.0103453	0.00952383	0.0102925	0.0100601	0.0050945	0.00425317	0.00484854	0.00466708	0.00484767	0.00742217	0.00889194	0.00925134	0.0128523
455	0.0062883	0.00766551	0.00867695	0.00802844	0.0107793	0.0104825	0.0096178	0.0103214	0.0102288	0.00528627	0.0044249	0.00503082	0.0048283	0.00498992	0.00748335	0.00898629	0.00937167	0.0128314
454	0.0062646	0.00772982	0.00871791	0.00801347	0.0107859	0.0104058	0.00965169	0.010298	0.0102761	0.00536821	0.00444063	0.0051489	0.00492745	0.00512499	0.00752831	0.00901735	0.00935836	0.0127446
453	0.00614716	0.00765904	0.00861977	0.0079819	0.0106673	0.0102427	0.00953561	0.0102614	0.0101496	0.0053699	0.0044429	0.00512467	0.0048615	0.00502647	0.0074888	0.00886244	0.00924173	0.0127085
452	0.00624476	0.00774235	0.00863238	0.0079243	0.0106563	0.0103449	0.00946381	0.010285	0.0101865	0.00552927	0.00454724	0.00520388	0.00504878	0.00513506	0.00757541	0.00898882	0.00922655	0.0127342
451	0.00642538	0.00780822	0.00869589	0.0079574	0.0106876	0.010347	0.00942265	0.0102763	0.010097	0.00554248	0.00457258	0.00531965	0.00517341	0.00517136	0.00752489	0.00900001	0.00930331	0.0126448
450	0.00612809	0.00739643	0.00821835	0.0076802	0.0102722	0.0100755	0.00907781	0.00992205	0.00984485	0.00544517	0.00434284	0.00505155	0.00494678	0.00489014	0.00738813	0.00854214	0.0088412	0.0124239
449	0.00619172	0.00743317	0.00831572	0.00764892	0.0103752	0.00994613	0.00910666	0.0099288	0.00975717	0.0053872	0.00436335	0.00513413	0.00491148	0.00497214	0.00745043	0.00851376	0.0087964	0.0123543
448	0.00606156	0.00734483	0.00820216	0.00762247	0.010337	0.00988187	0.00907001	0.00985823	0.00954678	0.00537494	0.00450434	0.00512273	0.00476036	0.00491073	0.00730155	0.00834318	0.00869756	0.0122234
447	0.00609415	0.00745093	0.0081441	0.00765359	0.0101998	0.00998741	0.00911829	0.00986838	0.00953662	0.00552842	0.00456353	0.00519851	0.00488825	0.00499606	0.00729038	0.00848499	0.0088006	0.0121817
446	0.00620229	0.00753464	0.00824092	0.00768299	0.0102361	0.0100266	0.00905872	0.00983503	0.00954613	0.00565577	0.00463364	0.00526266	0.00503985	0.00522505	0.00724898	0.00853407	0.00878286	0.0122394
445	0.00626723	0.007566	0.00839621	0.00754767	0.0101147	0.00990253	0.0090796	0.00980733	0.00954523	0.00568622	0.00475873	0.00530703	0.00512785	0.00509489	0.00731971	0.00846232	0.00872061	0.0122132
444	0.00631491	0.00746994	0.00825738	0.00756476	0.0101617	0.00988782	0.00897589	0.00980452	0.0095702	0.00586401	0.00474755	0.00544556	0.00525294	0.00510335	0.00730547	0.00840267	0.0085576	0.0121702
443	0.00616168	0.00754128	0.00826102	0.00754971	0.0101886	0.00984166	0.0088805	0.00976976	0.00943236	0.00586437	0.00491752	0.00569117	0.00533064	0.00520513	0.00737431	0.0084019	0.0084716	0.0121251
442	0.00636112	0.00778672	0.00841475	0.0076712	0.0102891	0.00993967	0.00895442	0.00976363	0.00945523	0.006056	0.00518409	0.00577989	0.00542587	0.00529243	0.00749432	0.00850645	0.00850109	0.0121284
441	0.00643289	0.00785291	0.00837866	0.00773299	0.0103015	0.0099122	0.00894446	0.0097296	0.0094801	0.00620689	0.00524092	0.00583289	0.00551579	0.00548027	0.00744226	0.00846421	0.00847422	0.0120805
440	0.00652333	0.00780191	0.0082505	0.0077022	0.0101037	0.00983511	0.00881915	0.00967465	0.00948129	0.00621363	0.0052692	0.00578957	0.00555986	0.00548902	0.00744829	0.00832765	0.00845271	0.0119488
439	0.00646575	0.00762499	0.00823732	0.00749754	0.00999192	0.00962725	0.0086884	0.00960778	0.00934994	0.00624541	0.00523891	0.00582445	0.00552712	0.00539967	0.00739858	0.00811283	0.00834786	0.0117632
438	0.00648713	0.00767175	0.00822403	0.00740987	0.00990009	0.0095097	0.00865207	0.00954266	0.00932405	0.00639711	0.00528914	0.00599451	0.00564938	0.00550144	0.00731816	0.0081908	0.0083052	0.0117563
437	0.00654966	0.00767991	0.00829967	0.00744858	0.00990703	0.00973733	0.00867108	0.00957103	0.00924689	0.00658862	0.00542205	0.00606345	0.00578525	0.00567519	0.00746052	0.00819572	0.00826183	0.0117245
436	0.00651907	0.00766185	0.00827603	0.00741803	0.00998377	0.0098263	0.00857365	0.0095713	0.00929317	0.00674036	0.00553624	0.0062036	0.00585568	0.00569238	0.00755271	0.00818624	0.00822994	0.0117129
435	0.00662624	0.00770832	0.00821504	0.00739379	0.00998423	0.0097413	0.008662	0.00959497	0.00929802	0.00690041	0.00566288	0.00642548	0.00601557	0.005894	0.00760404	0.00818109	0.00818222	0.0116674
434	0.00676699	0.00786401	0.00827883	0.00750936	0.0099574	0.00972913	0.00862394	0.00957677	0.00925039	0.00702774	0.00592754	0.00653893	0.00625287	0.00603022	0.00771988	0.0082842	0.00813282	0.0117534
433	0.00701453	0.0080153	0.00846625	0.00759243	0.0100903	0.00978699	0.0087017	0.00970779	0.00941416	0.00719232	0.00615911	0.00675054	0.00657407	0.00611642	0.00782879	0.00846423	0.00819675	0.0118806
432	0.00696076	0.00808671	0.0083908	0.00755048	0.0101472	0.00974628	0.00870471	0.00964909	0.00929305	0.00732694	0.0062427	0.00689645	0.0066835	0.00621148	0.00772252	0.00842171	0.00823245	0.0118236
431	0.00708505	0.00807309	0.00851585	0.00753316	0.00998722	0.00969089	0.00871251	0.00955041	0.00933583	0.0074814	0.00633583	0.00703372	0.00686032	0.00636993	0.00785741	0.00839953	0.00819818	0.0118045
430	0.00701249	0.00805656	0.00852226	0.00746757	0.00980173	0.00967057	0.00870402	0.00939059	0.00920789	0.00754513	0.00645775	0.00708216	0.00694769	0.00635993	0.00795764	0.00828266	0.00806108	0.0117472
429	0.00715853	0.00807222	0.00847504	0.0073993	0.00995143	0.00975666	0.00863583	0.00946394	0.0091751	0.00772917	0.00668841	0.00740853	0.00700307	0.00650486	0.00796085	0.00827389	0.00813878	0.011568
428	0.00722484	0.00821129	0.00847381	0.00745998	0.0100211	0.00966645	0.00854911	0.00935917	0.00918763	0.00799382	0.00673506	0.00748398	0.00707452	0.00663955	0.00796857	0.008292	0.00814929	0.0115496
427	0.00731084	0.00835898	0.00854374	0.0075682	0.00997429	0.00967974	0.00859935	0.00931701	0.00908105	0.00814882	0.00690098	0.00756846	0.00729159	0.00675816	0.00806447	0.00835861	0.00813109	0.0116557
426	0.00743302	0.00845184	0.00860361	0.00759568	0.00992133	0.00962875	0.00862184	0.00938203	0.00904584	0.00834692	0.00708727	0.00782414	0.00748473	0.0068744	0.00821802	0.00847944	0.00817631	0.0116695
425	0.00747321	0.0084394	0.00860027	0.00759885	0.00991994	0.00961904	0.00850216	0.00948936	0.00914069	0.00853271	0.00723426	0.00802153	0.00752482	0.0069686	0.00835773	0.00846867	0.00807305	0.0116739
424	0.00764536	0.00858508	0.00876171	0.00778336	0.0100451	0.00970165	0.00862761	0.00957966	0.00932991	0.00878325	0.00762487	0.0081768	0.00782222	0.00733213	0.00852323	0.00864065	0.00811538	0.0117583
423	0.00785348	0.00875207	0.00887607	0.00773817	0.0100895	0.00981674	0.00869955	0.00968429	0.00934023	0.00906459	0.00783319	0.00849508	0.00805471	0.00749992	0.00866944	0.00856365	0.00824354	0.0117328
422	0.00798869	0.00882394	0.00898035	0.00758527	0.0101091	0.00977191	0.00864616	0.00963834	0.00923786	0.00928863	0.00794783	0.0087212	0.00819469	0.00759238	0.00864529	0.00860672	0.00818814	0.0115785
421	0.00818528	0.00896314	0.00908816	0.00759002	0.0102185	0.00993186	0.00871907	0.00963029	0.00928317	0.0095277	0.00836682	0.00896282	0.00846799	0.00782234	0.00887061	0.00878407	0.00814764	0.0116674
420	0.00833126	0.0091263	0.00905843	0.00769121	0.0102903	0.00987368	0.00878916	0.00974125	0.00926712	0.00976898	0.00850693	0.00911953	0.00877507	0.00798286	0.00901995	0.00878011	0.00816974	0.011778
419	0.00851913	0.00934072	0.00920104	0.00782505	0.0103648	0.0098622	0.00876028	0.00979927	0.0093406	0.0100823	0.00870564	0.00936006	0.00900461	0.00829733	0.00917774	0.00896878	0.00820905	0.0119443
418	0.00847777	0.00920993	0.00911677	0.00768397	0.0102469	0.009785	0.00854852	0.00947031	0.00925985	0.0101367	0.00886347	0.00951454	0.00901951	0.00832738	0.00913282	0.00891944	0.00809867	0.0117813
417	0.00857453	0.00940907	0.0093876	0.00782899	0.0102536	0.0100054	0.00864783	0.00947015	0.00930794	0.0103192	0.00919369	0.00975587	0.00931298	0.00846855	0.00922308	0.00891341	0.0082205	0.0118287
416	0.00872482	0.00940651	0.00944607	0.0078459	0.0103647	0.0100926	0.00873188	0.00958992	0.00940089	0.0106337	0.00932836	0.00997627	0.00957365	0.00863424	0.00937605	0.00904724	0.00828148	0.0118344
415	0.00883215	0.00946026	0.00940084	0.00787892	0.0103294	0.0100242	0.00870753	0.00956442	0.00935358	0.0109106	0.0095568	0.0101575	0.00966242	0.00876691	0.00955073	0.00901379	0.00817396	0.0117565
414	0.0087859	0.00947739	0.00931232	0.0077983	0.0102051	0.00981489	0.00853894	0.00956395	0.00925523	0.0109217	0.00972989	0.0102997	0.00967503	0.00893483	0.00932793	0.00882348	0.0080546	0.0117199
413	0.00870886	0.0094886	0.00921606	0.00771857	0.0101414	0.00977912	0.0084357	0.00946116	0.00899279	0.0109136	0.00984242	0.0103046	0.00980952	0.00886553	0.00943935	0.0087993	0.00797108	0.0117306
412	0.00889848	0.00964731	0.00935022	0.00791697	0.0102763	0.00984784	0.00853509	0.00964744	0.00901444	0.0113595	0.00997101	0.0105682	0.0102074	0.00901438	0.00965141	0.00893222	0.0081035	0.0117679
411	0.00918762	0.00982184	0.00948768	0.00808663	0.0105081	0.00987324	0.00858856	0.00967464	0.00917171	0.0117566	0.0102873	0.0108824	0.0104141	0.00936972	0.0098274	0.00907786	0.00823141	0.0118396
410	0.00904251	0.00969057	0.0095094	0.00795479	0.0102844	0.00984104	0.00849289	0.00943624	0.00911302	0.0116788	0.0102298	0.0108889	0.0105777	0.00942077	0.0099172	0.00894236	0.00798239	0.011626
409	0.00939316	0.00985543	0.00958646	0.00807829	0.0104073	0.00992616	0.00856146	0.0095388	0.00919017	0.0119993	0.0105575	0.0111157	0.010838	0.00971623	0.00996796	0.00914043	0.00814143	0.0117199
408	0.00967594	0.0101487	0.00978534	0.00811659	0.010588	0.010008	0.00880295	0.00969196	0.00931982	0.0123131	0.0109914	0.0114737	0.0111874	0.00998778	0.010087	0.00927483	0.00821638	0.0119026
407	0.0098043	0.010368	0.0098049	0.0082634	0.0106614	0.0100056	0.00881704	0.00976419	0.00945579	0.0126128	0.0112242	0.0117748	0.0114066	0.0101495	0.0101571	0.0092974	0.00831073	0.0120263
406	0.00998597	0.010423	0.00995673	0.00834375	0.0108197	0.0101952	0.0089015	0.00980811	0.00950455	0.0128442	0.0115246	0.0119883	0.0115279	0.0104142	0.0102664	0.00944795	0.00837795	0.0120085
405	0.0101035	0.0106224	0.0099944	0.00837367	0.0108762	0.0102882	0.00895951	0.00991193	0.00945453	0.0131278	0.0116635	0.0121445	0.0117698	0.0106316	0.0104917	0.00953343	0.00847171	0.0118692
404	0.0101944	0.0107228	0.00990698	0.00835425	0.0107268	0.0102989	0.00890441	0.00975288	0.00943672	0.0132763	0.0117211	0.0123469	0.0119215	0.0106561	0.0106344	0.00950676	0.00847587	0.0119803
403	0.0103136	0.0107166	0.00992024	0.00832257	0.010546	0.0103248	0.00881848	0.00979477	0.00942348	0.0134468	0.0119712	0.0124685	0.0121228	0.0107635	0.0106108	0.00946262	0.00840391	0.0119459
402	0.0103703	0.010749	0.0100841	0.00835678	0.0103651	0.0101921	0.00881262	0.0098567	0.00937158	0.013481	0.0120717	0.0125536	0.0121629	0.0109152	0.0106277	0.00947695	0.00831607	0.0119425
401	0.0103345	0.010669	0.0100205	0.00836419	0.0104718	0.010074	0.00875961	0.00979168	0.00927709	0.0135816	0.0120898	0.0125463	0.0121401	0.0108832	0.0107392	0.00937701	0.00822442	0.0118997
400	0.0105261	0.0107599	0.0100563	0.00855344	0.0106353	0.010133	0.00882899	0.00973876	0.00942537	0.0138425	0.01232	0.0127982	0.0122934	0.0110336	0.0109001	0.00967205	0.0083384	0.0119687
399	0.010759	0.0109238	0.0102222	0.00862102	0.0107061	0.0103238	0.00887345	0.009906	0.0094622	0.0140461	0.012571	0.0130665	0.0126602	0.0113442	0.0110524	0.00971497	0.00842024	0.0120957
398	0.010907	0.0110847	0.010388	0.00858456	0.0108294	0.0104654	0.00895313	0.0100106	0.00953665	0.0143447	0.0128499	0.013343	0.0129099	0.0115513	0.01111	0.00967642	0.00848057	0.0121189
397	0.0110039	0.0112949	0.0105211	0.00871391	0.0108952	0.0104764	0.00891849	0.0100243	0.00965761	0.0145497	0.0131164	0.0135941	0.0131331	0.0117074	0.0112037	0.00976939	0.00852938	0.0122431
396	0.0111402	0.0113873	0.0105277	0.00874553	0.0108576	0.0104756	0.00897728	0.0100346	0.00968693	0.0148026	0.013208	0.0137266	0.0132947	0.0116845	0.0113272	0.00990539	0.00864441	0.0122711
395	0.0112065	0.0114453	0.0105417	0.00871082	0.0109145	0.0105264	0.00903634	0.00996741	0.00955606	0.0149181	0.0132028	0.0137329	0.0134108	0.011872	0.0113601	0.00988644	0.00874	0.0124021
394	0.0113042	0.0114551	0.0106013	0.00870151	0.0110543	0.0104902	0.00897777	0.00990851	0.00956829	0.0149441	0.0134447	0.0137868	0.0134876	0.0119284	0.0115003	0.0100778	0.00872617	0.012351
393	0.0113991	0.0115722	0.0108148	0.00887414	0.0109929	0.0105847	0.00901497	0.0098761	0.00970828	0.0151015	0.0136674	0.0138708	0.013706	0.0120147	0.0115758	0.0101573	0.00860017	0.0123834
392	0.0114535	0.0116867	0.0108257	0.00887357	0.010996	0.010608	0.00904711	0.00994869	0.00976199	0.0152676	0.0137589	0.0140879	0.0137462	0.0121446	0.0115695	0.0100585	0.00852904	0.0124539
391	0.0115488	0.0116202	0.0108359	0.00887353	0.0110991	0.0106783	0.00910773	0.0100202	0.00966628	0.0152885	0.013763	0.0141933	0.0138819	0.0123596	0.0116044	0.0101645	0.00848195	0.012511
390	0.0117191	0.0117882	0.0109178	0.0090146	0.0112421	0.0108666	0.00932058	0.0101274	0.00967782	0.0154738	0.0139884	0.0143611	0.0140798	0.0124665	0.0118445	0.0102988	0.00875854	0.0125846
389	0.01199	0.0121248	0.011089	0.00918609	0.0114028	0.0110183	0.00936768	0.0103694	0.00982958	0.0157118	0.0142202	0.0146349	0.0142056	0.0126097	0.0119684	0.0103709	0.00897539	0.0126968
388	0.0121371	0.0123601	0.0112354	0.00926351	0.0115018	0.0110831	0.00944801	0.0105649	0.00993787	0.0158182	0.014396	0.0149368	0.0143449	0.0126821	0.0120767	0.0106143	0.00911126	0.0129239
387	0.0120534	0.0121652	0.0111193	0.00905241	0.0113685	0.0109812	0.00932239	0.0103254	0.00980991	0.0157961	0.0142508	0.014861	0.0143768	0.0126026	0.0119973	0.0104415	0.00904976	0.0128623
386	0.012117	0.0122927	0.011156	0.00914236	0.0114885	0.0110647	0.00931936	0.0104239	0.00987186	0.0161478	0.0143711	0.0148806	0.0145472	0.0126522	0.0121292	0.0104328	0.00895845	0.0129853
385	0.0120695	0.0123777	0.0112146	0.00919005	0.0114652	0.0111295	0.00935607	0.0104134	0.00994388	0.016231	0.0144999	0.0148036	0.0145613	0.0126863	0.0121612	0.0105816	0.00893136	0.0130791
384	0.0121153	0.0123341	0.0112957	0.00928199	0.0114683	0.0112396	0.00935531	0.0104149	0.00995925	0.0162542	0.0145322	0.0147517	0.0145721	0.0128371	0.0121028	0.0105992	0.00898005	0.012955
383	0.0121866	0.0123757	0.0112328	0.00941084	0.0115908	0.0113424	0.00940481	0.0105248	0.0101546	0.0163196	0.0146146	0.0148837	0.014802	0.0128852	0.0121855	0.0107528	0.00904507	0.0130153
382	0.0122307	0.0124945	0.0113112	0.00953847	0.011753	0.0113483	0.00956606	0.0105409	0.010194	0.0163822	0.0146915	0.015098	0.0148909	0.0129119	0.012303	0.0107644	0.0090921	0.0131932
381	0.0122795	0.0124987	0.0114016	0.00949024	0.0117661	0.0113759	0.00963575	0.0106095	0.0101594	0.0164202	0.0146889	0.0151445	0.0148324	0.0129456	0.0124171	0.0107387	0.00918268	0.0132379
380	0.0124161	0.0126846	0.0114049	0.0096006	0.0118593	0.0114396	0.00963557	0.0107619	0.0102419	0.0164698	0.0147039	0.0151842	0.0148615	0.0130794	0.0125165	0.0108376	0.00922866	0.0133531
379	0.0125032	0.0128229	0.0115181	0.00958967	0.0119837	0.0115093	0.00962643	0.0107614	0.0103257	0.0166112	0.0147954	0.0152046	0.0149777	0.0132855	0.0126224	0.0109314	0.00923613	0.0132975
378	0.0124511	0.0126727	0.0114635	0.0096002	0.0119502	0.0114789	0.00962883	0.0108014	0.0102318	0.0165778	0.0148035	0.015069	0.0150352	0.0133061	0.0125451	0.0110001	0.00926757	0.0133551
377	0.0124834	0.0126847	0.0116304	0.00978568	0.0120088	0.0117155	0.00974063	0.0108059	0.0103304	0.0165237	0.0149114	0.0151654	0.015187	0.0133546	0.0126591	0.0110832	0.00940922	0.0135062
376	0.0124353	0.012788	0.0115326	0.00976607	0.0120992	0.0117068	0.00964094	0.0108142	0.0103182	0.0165394	0.0148116	0.0150582	0.0151119	0.0131824	0.0125476	0.011105	0.00937483	0.0135846
375	0.0124684	0.0128261	0.0114864	0.0097623	0.0120546	0.0116692	0.00968933	0.010834	0.0101919	0.0165709	0.014756	0.0150456	0.0150149	0.0130971	0.0126139	0.011049	0.009365	0.0136472
374	0.012479	0.0128603	0.0115936	0.00971927	0.0120695	0.0117495	0.00954037	0.0109467	0.0102124	0.0166587	0.0147726	0.0151756	0.0149369	0.0131705	0.0127266	0.0110431	0.00941436	0.0136909
373	0.0122873	0.0127244	0.0114625	0.00956667	0.0120379	0.0118192	0.00958557	0.0108544	0.0102839	0.0165863	0.0146283	0.0149092	0.0149976	0.0129662	0.0126463	0.0111381	0.00923936	0.0135675
372	0.0122894	0.0125609	0.0114021	0.00964162	0.0121061	0.0117744	0.0097207	0.0108078	0.0103508	0.016528	0.0146425	0.0148367	0.0149841	0.0129219	0.0124498	0.0111411	0.00922367	0.0136221
371	0.0125338	0.0127539	0.0116901	0.00995842	0.0123301	0.0120284	0.00987713	0.0109479	0.0103974	0.0167374	0.0146987	0.0150007	0.0151078	0.0130391	0.0127744	0.0113477	0.0095235	0.0140523
370	0.0124654	0.0126255	0.0115091	0.00995489	0.0120766	0.011961	0.00978611	0.0109249	0.0103653	0.0164437	0.014442	0.0148702	0.0149038	0.012881	0.012628	0.0113857	0.00949579	0.0140222
369	0.0124508	0.0125971	0.011514	0.00977623	0.0121135	0.01193	0.00975117	0.0109604	0.0103613	0.0163153	0.0144061	0.0147553	0.0147633	0.0128715	0.0125182	0.0112556	0.00946489	0.0139512
368	0.0124059	0.0128217	0.0116678	0.00985363	0.0122329	0.0120698	0.00987328	0.0110699	0.0105897	0.0165073	0.0144822	0.0148641	0.0148044	0.0128945	0.0124499	0.0112487	0.00963674	0.0141516
367	0.0123621	0.0129513	0.0117379	0.0099216	0.012407	0.0122238	0.0100689	0.011127	0.0105887	0.0165785	0.0144467	0.0148169	0.0148898	0.0128225	0.0125561	0.0113026	0.00969855	0.0142538
366	0.0125591	0.0130474	0.0116679	0.010098	0.0125124	0.0124609	0.0102278	0.0112484	0.0106901	0.0165613	0.0144161	0.014805	0.0148389	0.0128531	0.0126264	0.0113676	0.00985438	0.0143998
365	0.0125376	0.0131529	0.0116957	0.0101467	0.0124996	0.0123867	0.0100371	0.0111999	0.0106355	0.0164109	0.0143181	0.0146661	0.0146319	0.0128268	0.0125399	0.0115095	0.0097794	0.0145236
364	0.0125286	0.0131307	0.0118309	0.0100922	0.0125628	0.0123852	0.0101178	0.0112397	0.0106194	0.0163498	0.0143356	0.0146428	0.0146879	0.0128314	0.0126045	0.0116317	0.00981823	0.0146813
363	0.0124591	0.0129183	0.011793	0.0101809	0.0125829	0.0123286	0.010138	0.0113281	0.0106164	0.0163155	0.0141715	0.0145369	0.0146538	0.0127109	0.012658	0.0113925	0.0098517	0.0146764
362	0.0121282	0.0127092	0.011623	0.0100604	0.0123833	0.0121491	0.00989517	0.0112516	0.0105873	0.0161254	0.0138895	0.0143054	0.0143351	0.012463	0.0125396	0.0112981	0.00971786	0.0145815
361	0.0122795	0.0128446	0.0116184	0.0101321	0.0125959	0.0124765	0.010059	0.0114142	0.0108304	0.0161196	0.0138583	0.0142986	0.0142821	0.0125067	0.0126046	0.0114881	0.00984497	0.0147658
360	0.0123972	0.0128852	0.0117554	0.0100599	0.0126098	0.0126975	0.0103367	0.0114974	0.0108618	0.0162252	0.0138821	0.0142228	0.0144223	0.0125777	0.0127213	0.0116308	0.00993858	0.0148522
359	0.0124421	0.0128784	0.0119412	0.0102095	0.0126391	0.0127776	0.0105166	0.011611	0.0109295	0.0163979	0.0138789	0.0141499	0.01447	0.0123832	0.0127725	0.0118068	0.0101716	0.0150109
358	0.0121548	0.0128261	0.0116631	0.0101591	0.0126684	0.0126956	0.0102854	0.0115783	0.0107857	0.0160006	0.0136347	0.0138956	0.0144063	0.0121924	0.0125405	0.0116335	0.00990118	0.0149778
357	0.0121879	0.0128487	0.0117616	0.0101883	0.012797	0.0128649	0.0102418	0.0115072	0.0107972	0.0158775	0.0134573	0.0138964	0.0143045	0.012175	0.0124363	0.0115551	0.0098966	0.01512
356	0.0120434	0.0128295	0.0117546	0.0101873	0.0126671	0.0127654	0.0103068	0.0115976	0.0107803	0.0158219	0.0133097	0.0138952	0.0139794	0.0122034	0.0123049	0.0114818	0.0098923	0.0151446
355	0.0119189	0.0126879	0.011649	0.0101533	0.0127019	0.0127529	0.0102296	0.011508	0.0107467	0.0155682	0.0132369	0.0137078	0.0140238	0.0120344	0.0122185	0.0115117	0.00974357	0.0151353
354	0.0120893	0.0128595	0.0118214	0.0101956	0.0130162	0.0129878	0.0103612	0.0116973	0.0109436	0.015689	0.0133379	0.0137472	0.0142008	0.0121012	0.0123359	0.0116788	0.00995481	0.0152528
353	0.012067	0.0129444	0.0119379	0.0103927	0.0131296	0.0132119	0.0105682	0.0119368	0.0110884	0.0157981	0.0133649	0.0137347	0.0140278	0.0121863	0.0123181	0.011747	0.0102125	0.0154007
352	0.0120553	0.0128291	0.0117536	0.0103872	0.0128521	0.0131043	0.0104253	0.0117844	0.0110283	0.0155388	0.013211	0.0135408	0.0138748	0.0117723	0.0121253	0.0115523	0.0101368	0.0154848
351	0.0120252	0.0129261	0.0117119	0.0103641	0.0129464	0.0132349	0.0103712	0.0116587	0.0110573	0.015495	0.012952	0.0133981	0.0138978	0.011572	0.0122557	0.0114701	0.00998448	0.0155717
350	0.011852	0.0128986	0.0116753	0.0103307	0.0129789	0.013344	0.0103116	0.0116571	0.0109492	0.0154469	0.0128428	0.0132141	0.0137245	0.0116143	0.0121476	0.0115646	0.00996173	0.0156291
349	0.0119126	0.0128932	0.011782	0.0104675	0.0131146	0.0134148	0.0105587	0.0118536	0.01108	0.0155334	0.0127483	0.0132697	0.0137029	0.0116672	0.0122501	0.0117503	0.01019	0.0158478
348	0.0119021	0.0128767	0.0118319	0.010489	0.0131836	0.0133417	0.0104804	0.0118553	0.0111525	0.0153789	0.0127859	0.0131279	0.0136411	0.0115754	0.0121618	0.0116876	0.0101457	0.0160053
347	0.0118048	0.0127922	0.0117289	0.0103512	0.0131053	0.0132684	0.0104948	0.0120672	0.0110889	0.0152575	0.012647	0.0130598	0.0134976	0.0114261	0.0119819	0.0116628	0.0100272	0.0160147
346	0.0117244	0.0127676	0.011604	0.0103307	0.0131981	0.0134696	0.0105989	0.0119772	0.0110617	0.0151123	0.0124439	0.0128941	0.0132472	0.0113472	0.0118815	0.0116123	0.0099827	0.0158986
345	0.0117076	0.0126837	0.0116712	0.0103299	0.0132924	0.0135945	0.0105087	0.0118022	0.0111477	0.0149588	0.0124047	0.0126213	0.0132064	0.0111669	0.0118287	0.0116429	0.010054	0.0161153
344	0.0116597	0.0128695	0.0117119	0.0103579	0.0133785	0.0137219	0.0106352	0.0118826	0.0112957	0.0151539	0.0125141	0.0125658	0.0131917	0.011081	0.0118815	0.0117344	0.0102873	0.0163851
343	0.0115769	0.0127955	0.0117629	0.010443	0.0134957	0.0137648	0.0106332	0.0121073	0.0112818	0.0152001	0.0124191	0.0125302	0.0131131	0.011116	0.0119426	0.0116482	0.0103871	0.0163827
342	0.0114179	0.0124287	0.0114843	0.0102684	0.0133596	0.0138252	0.0105264	0.0119323	0.0110321	0.0149735	0.0121492	0.0122981	0.0128848	0.0109143	0.0117989	0.0114185	0.0101351	0.0163327
341	0.0112373	0.0123747	0.0114966	0.0103068	0.0131129	0.0137413	0.0104152	0.0116485	0.0109864	0.014767	0.0118757	0.0121781	0.0126974	0.0107423	0.0116151	0.0113359	0.0101245	0.0163267
340	0.0112869	0.0121829	0.0112518	0.00999917	0.0129433	0.0134817	0.0102627	0.0116383	0.0104826	0.0146017	0.0118014	0.0118661	0.0124539	0.0103134	0.0112856	0.0113996	0.00961977	0.0164008
339	0.0112522	0.0122255	0.0111121	0.0100212	0.0128141	0.013496	0.0102045	0.0117766	0.0105639	0.0146132	0.0117875	0.0117181	0.01229	0.0103137	0.0112586	0.0112082	0.00978909	0.0163431
338	0.0113464	0.0124692	0.0111675	0.0101506	0.0129731	0.0136311	0.0102622	0.0117473	0.0107664	0.0146847	0.0117552	0.0116824	0.0124405	0.0103445	0.0112348	0.0113396	0.00986979	0.0164919
337	0.0113499	0.0122924	0.011116	0.0102035	0.0129666	0.0136728	0.0102623	0.0117229	0.0106594	0.0145733	0.0114703	0.0115932	0.0123495	0.0101601	0.0112865	0.0112118	0.00961511	0.0166033
336	0.0111655	0.0121705	0.0111333	0.0100119	0.0129158	0.0135432	0.0102513	0.0117088	0.0106561	0.0143551	0.0113102	0.0113798	0.0122914	0.0102706	0.011126	0.0111177	0.00965536	0.0166839
335	0.0111817	0.0121779	0.011103	0.0101409	0.0131621	0.0136853	0.0103514	0.0117833	0.0105871	0.0143856	0.011422	0.0114076	0.0124399	0.0102451	0.0111224	0.0113257	0.00972872	0.0168305
334	0.011212	0.0122274	0.0111422	0.0102973	0.0132483	0.0139447	0.0104033	0.0118406	0.0105655	0.014441	0.0115326	0.011374	0.0123225	0.0100586	0.0111486	0.0112163	0.00980245	0.0168287
333	0.0111636	0.0123147	0.0111759	0.01028	0.0132022	0.01394	0.0104886	0.0119008	0.0105929	0.0145846	0.011481	0.0112457	0.0121932	0.00996539	0.0109745	0.0112216	0.00983423	0.0168057
332	0.0109354	0.0121447	0.0109504	0.0101135	0.0130222	0.0137297	0.0102603	0.0117854	0.0104302	0.0144006	0.0111899	0.0109949	0.0119252	0.00976689	0.0108904	0.011045	0.00965702	0.0166863
331	0.0111225	0.0121509	0.0110401	0.0101213	0.0132949	0.013905	0.0103547	0.0118297	0.0106378	0.0143744	0.011184	0.0109774	0.0118501	0.00977852	0.010925	0.0111932	0.00966179	0.0167099
330	0.0111912	0.0123616	0.0112263	0.0101842	0.013349	0.0140533	0.010439	0.0120302	0.010746	0.0145262	0.0111193	0.0110924	0.0121382	0.00996052	0.0110808	0.0114192	0.00979889	0.0169047
329	0.0110386	0.0123734	0.0110673	0.0101886	0.0132412	0.0139875	0.0103964	0.0120164	0.0107614	0.0144367	0.0111506	0.0111098	0.0120599	0.00993554	0.0109719	0.0113121	0.00976808	0.0168837
328	0.011137	0.0122956	0.0110681	0.0103543	0.0134166	0.0140549	0.0104652	0.0120275	0.0107872	0.0143104	0.0111704	0.011136	0.0120839	0.0100236	0.0109667	0.0113475	0.00978456	0.0170226
327	0.0110676	0.0121795	0.0112193	0.0103868	0.0133944	0.0139852	0.0104865	0.0120506	0.0107834	0.0143413	0.0110815	0.010984	0.0119854	0.0098659	0.0107695	0.0114653	0.00972687	0.0170746
326	0.0110408	0.0123517	0.0113915	0.0104801	0.0134703	0.0141221	0.0106428	0.0121743	0.0107473	0.0144597	0.0110339	0.0111125	0.0120864	0.0098486	0.0109348	0.011446	0.00974366	0.0171873
325	0.0109427	0.0121432	0.0111488	0.0103392	0.013331	0.0140397	0.0104386	0.0120371	0.0107491	0.0142675	0.0108817	0.0108624	0.0118749	0.00961178	0.0108716	0.0113107	0.00959065	0.0171433
324	0.0109914	0.0122088	0.0112079	0.010325	0.0133858	0.0140868	0.0104679	0.0118593	0.0108168	0.0142667	0.0108812	0.0107507	0.0119235	0.00970895	0.0108864	0.0114205	0.00978102	0.0170796
323	0.0109988	0.0123936	0.0111893	0.0104456	0.0134851	0.014235	0.010582	0.0120214	0.0108713	0.0143696	0.0109973	0.0107187	0.0120702	0.00981063	0.0110171	0.0114158	0.0098379	0.0171053
322	0.0110545	0.0123852	0.0112498	0.010494	0.0135696	0.014427	0.0106183	0.0120969	0.0108241	0.0144624	0.0109734	0.0106876	0.0121374	0.00973374	0.0109215	0.0113918	0.00979317	0.0171187
321	0.0110584	0.0124329	0.0113166	0.0105317	0.0137965	0.0144276	0.0106446	0.012195	0.0108608	0.0145087	0.0109812	0.0108357	0.0120855	0.00969788	0.0109852	0.0114951	0.00989912	0.0171493
320	0.0111264	0.0125142	0.0114821	0.0106617	0.0139079	0.0143976	0.0107464	0.0122522	0.0110353	0.014488	0.0110411	0.0108549	0.012118	0.00976624	0.0110255	0.0115726	0.00995165	0.0171633
319	0.0111641	0.012449	0.0115062	0.0105106	0.0137737	0.0143132	0.0107177	0.0121482	0.0109062	0.0144056	0.0108593	0.0107983	0.0120624	0.0095654	0.0108268	0.011527	0.00998376	0.0171972
318	0.0110086	0.0122952	0.0114119	0.0105249	0.0136832	0.0143745	0.0107069	0.0121089	0.0108342	0.0144293	0.0107998	0.0106246	0.011986	0.00950899	0.0108973	0.0114416	0.00988917	0.0170687
317	0.0108497	0.0123506	0.0113508	0.0105537	0.0136522	0.014438	0.0105917	0.0122011	0.0107911	0.014567	0.0108152	0.0105766	0.0118654	0.00948729	0.0110055	0.011369	0.00966466	0.0170424
316	0.0110955	0.0123446	0.0113725	0.0104418	0.0136579	0.0144054	0.0106418	0.0121548	0.0108278	0.0145436	0.0107151	0.0105821	0.0118335	0.00948414	0.010919	0.0114807	0.00961545	0.0170231
315	0.011282	0.0125874	0.0115666	0.0106877	0.0139146	0.0147144	0.0108849	0.0123803	0.0109316	0.0146563	0.0108662	0.010661	0.0120097	0.00958509	0.0110507	0.0115922	0.00986946	0.017184
314	0.0113356	0.0128508	0.0116131	0.0109856	0.0141471	0.0148706	0.0110105	0.0126251	0.0111088	0.014931	0.0109942	0.0108656	0.0122557	0.00973529	0.0111907	0.0118571	0.0101026	0.0173007
313	0.011394	0.0128264	0.0116496	0.0110947	0.0143744	0.0149262	0.0110898	0.0127318	0.0111713	0.0150929	0.0111497	0.0109538	0.0123557	0.00973892	0.0113808	0.0118905	0.010136	0.0173889
312	0.0115452	0.0130083	0.0118996	0.0112986	0.0147069	0.015221	0.0113266	0.0127703	0.0113229	0.0152478	0.0112478	0.0111408	0.0124925	0.00995569	0.0116001	0.0120841	0.0102392	0.0176245
311	0.0117931	0.0132321	0.0119761	0.0115061	0.0148161	0.0153803	0.0114198	0.0129607	0.0115074	0.0154425	0.0112978	0.0112484	0.0125699	0.0100444	0.0115897	0.0122975	0.0105154	0.0179723
310	0.0120065	0.0134473	0.0122774	0.0117421	0.0150341	0.0155144	0.0115829	0.0131843	0.011707	0.0157431	0.0116074	0.0114501	0.0128745	0.0102166	0.011732	0.0123691	0.0107775	0.0181436
309	0.0121807	0.0137495	0.0125172	0.0118783	0.01519	0.0158078	0.0118606	0.0133612	0.0118585	0.0160899	0.0117831	0.0115279	0.0130302	0.01041	0.0120031	0.0126293	0.0109281	0.0182805
308	0.0125408	0.014301	0.0129046	0.0123819	0.0156992	0.0162778	0.0124327	0.0138816	0.0124576	0.0166005	0.0121647	0.0119154	0.0134831	0.0107828	0.0124662	0.0130285	0.0112334	0.0187503
307	0.0131065	0.0147364	0.0135576	0.0130247	0.0162593	0.0169819	0.0129331	0.0144469	0.0129803	0.0171067	0.0127511	0.0125581	0.0142083	0.0113668	0.013083	0.013663	0.0118447	0.0193379
306	0.0136757	0.0154103	0.014143	0.0135625	0.016996	0.0175603	0.013517	0.0151243	0.0134994	0.0177314	0.0133153	0.0131665	0.0148051	0.0120307	0.0135636	0.0142264	0.0124499	0.0199033
305	0.0147789	0.0165098	0.0151839	0.0146312	0.0180764	0.0186221	0.014639	0.0162285	0.0144608	0.0189154	0.014153	0.0140032	0.0158034	0.0129564	0.0145394	0.0153216	0.0135138	0.0208973
304	0.0161412	0.017691	0.0164175	0.0160144	0.0193742	0.0198806	0.0158254	0.0174489	0.0156614	0.0201148	0.0155739	0.0151907	0.0170508	0.0142117	0.0158647	0.0166454	0.014749	0.0221722
303	0.0175843	0.0192255	0.017773	0.0173926	0.0206841	0.0212581	0.0171669	0.0187607	0.0171125	0.0215282	0.0170165	0.0167364	0.018431	0.0156124	0.0172919	0.0180007	0.0160638	0.0236752
302	0.0191446	0.0209568	0.0193654	0.0191318	0.0223427	0.0231675	0.018842	0.0204616	0.0188112	0.0233162	0.018711	0.0185046	0.0201226	0.0172556	0.0189583	0.0196982	0.0178397	0.0253549
301	0.0214066	0.0231457	0.0216391	0.0213838	0.0246572	0.0254484	0.0210795	0.0227596	0.0209632	0.0257383	0.0209836	0.0207037	0.0224996	0.0194799	0.0211586	0.022068	0.0201857	0.0275716
300	0.0240686	0.0255609	0.0242358	0.0239499	0.0272974	0.0281752	0.0237182	0.0252696	0.023457	0.0284597	0.023675	0.0232037	0.0250771	0.0220155	0.0237883	0.0245896	0.0226948	0.0300552
299	0.0269291	0.0284227	0.0270226	0.0268146	0.0301179	0.0310914	0.0265497	0.0281831	0.0262052	0.0314851	0.0265284	0.0259976	0.0278837	0.0248781	0.0266676	0.0274485	0.0255804	0.0330811
298	0.0303104	0.031931	0.0305777	0.0302917	0.033718	0.034598	0.0300497	0.0316597	0.0296695	0.0351284	0.0299985	0.0295439	0.0313401	0.0283399	0.0302735	0.030869	0.029262	0.036665
297	0.0345756	0.0360112	0.0346477	0.0344385	0.037826	0.0387051	0.0342205	0.0356787	0.0338332	0.0393912	0.0342276	0.0337358	0.0355987	0.0324178	0.034327	0.0350185	0.0334363	0.0407849
296	0.0395555	0.0410971	0.0394731	0.0393551	0.0427417	0.0436811	0.0390548	0.0405582	0.0385288	0.0444275	0.0392653	0.0386757	0.0406029	0.037431	0.0393678	0.039978	0.0383575	0.0456125
295	0.0455754	0.0471564	0.0453997	0.0452551	0.0487609	0.0497353	0.0449031	0.0465748	0.0443201	0.0505486	0.0453419	0.0446988	0.0467233	0.0434123	0.0451806	0.0459938	0.0444044	0.0516674
294	0.0526469	0.0539167	0.0523469	0.0524204	0.0558232	0.0567793	0.0518481	0.0534283	0.051072	0.057879	0.0524828	0.0519243	0.0538593	0.0504171	0.0522731	0.0530187	0.0514169	0.0587351
293	0.0600153	0.0612727	0.0596809	0.0597321	0.0631118	0.0641593	0.0590116	0.0606991	0.0582223	0.0653943	0.0599204	0.0593655	0.0611936	0.0578399	0.0598165	0.0602368	0.0587993	0.0661126
292	0.0669698	0.0680664	0.0664294	0.0664767	0.06992	0.0710073	0.0658751	0.0674828	0.064974	0.0724561	0.066767	0.0661064	0.0679213	0.0647034	0.0666368	0.0669687	0.0656626	0.0730267
291	0.0726246	0.0736005	0.0719172	0.0720168	0.0755441	0.0766659	0.0714192	0.0729941	0.0703497	0.0782677	0.072307	0.0715153	0.0733779	0.0701593	0.0721745	0.0724756	0.0712505	0.0785642
290	0.0770544	0.0782056	0.0763859	0.0765981	0.0800758	0.0813972	0.0757995	0.0775518	0.0747421	0.0828152	0.0769692	0.0758231	0.0779026	0.0745309	0.0766799	0.076997	0.0758985	0.0830965
289	0.0817173	0.0829296	0.0812496	0.0814416	0.084912	0.0862332	0.0805368	0.0823252	0.0794752	0.0876489	0.0815621	0.0806085	0.0826824	0.0792088	0.0815616	0.0819193	0.0807261	0.0880453
288	0.0874101	0.0884536	0.0866068	0.0869655	0.090493	0.0917614	0.0860451	0.0877841	0.0848031	0.0932984	0.086906	0.0861245	0.0881979	0.0847654	0.0870653	0.0874594	0.086364	0.0936076
287	0.0935452	0.0943812	0.0924387	0.0930284	0.0965323	0.0978931	0.0920818	0.0937711	0.0906842	0.0994816	0.0930073	0.0920038	0.0942155	0.0908687	0.0929281	0.0933301	0.0924305	0.0995858
286	0.0992359	0.100152	0.0982461	0.0987198	0.102278	0.103522	0.0976013	0.099181	0.0961696	0.105451	0.098976	0.0977729	0.0999926	0.0965469	0.0986818	0.0989375	0.0980284	0.10532
285	0.103632	0.104549	0.102431	0.103084	0.106618	0.10797	0.101956	0.103343	0.100388	0.109946	0.103431	0.102259	0.104483	0.100792	0.103007	0.103221	0.102255	0.109615
284	0.10663	0.107551	0.105428	0.106101	0.109533	0.111025	0.104961	0.106233	0.103169	0.113187	0.106347	0.10517	0.107347	0.103809	0.105928	0.106116	0.105119	0.112577
283	0.108984	0.109817	0.107611	0.108305	0.111821	0.113375	0.107031	0.108641	0.10522	0.115712	0.10866	0.107423	0.109419	0.105936	0.108171	0.108278	0.107305	0.114881
282	0.110696	0.111652	0.109319	0.11014	0.11382	0.115245	0.108796	0.110412	0.106975	0.11763	0.110335	0.109118	0.111151	0.10753	0.109966	0.11007	0.109153	0.116623
281	0.111932	0.112875	0.110685	0.111458	0.115144	0.116604	0.110014	0.111701	0.108295	0.118994	0.111591	0.110237	0.112357	0.108704	0.111165	0.111287	0.110417	0.117967
280	0.112428	0.113297	0.111131	0.111891	0.11574	0.117186	0.110486	0.112303	0.108693	0.119516	0.112013	0.110614	0.112859	0.109005	0.111557	0.111686	0.110775	0.118366
279	0.112248	0.113127	0.110993	0.111778	0.115537	0.117103	0.110479	0.112098	0.108436	0.11956	0.111869	0.11039	0.112774	0.108857	0.111276	0.111565	0.110407	0.118238
278	0.111757	0.112701	0.110549	0.111228	0.114969	0.116601	0.109919	0.111565	0.107945	0.119203	0.111423	0.109825	0.11224	0.108344	0.1107	0.110871	0.109893	0.117636
277	0.110938	0.111969	0.109759	0.110537	0.114082	0.115818	0.109057	0.110687	0.107189	0.118585	0.110518	0.108902	0.111211	0.107406	0.109804	0.10985	0.109074	0.116777
276	0.109903	0.110958	0.108774	0.109596	0.113067	0.11498	0.108059	0.109687	0.106219	0.117643	0.109505	0.107829	0.110209	0.106242	0.108655	0.108811	0.107903	0.11577
275	0.108275	0.109498	0.107184	0.107923	0.11161	0.113415	0.106582	0.108189	0.104632	0.116143	0.107839	0.106237	0.10873	0.104613	0.107019	0.107207	0.106212	0.114153
274	0.10651	0.107698	0.105363	0.105986	0.109802	0.111485	0.10476	0.106508	0.102803	0.114411	0.106078	0.104272	0.106881	0.102787	0.105072	0.105319	0.104336	0.112405
273	0.104207	0.105425	0.10306	0.103742	0.107518	0.109214	0.102334	0.104187	0.100561	0.112249	0.103755	0.101854	0.104417	0.100395	0.102713	0.1029	0.101934	0.110087
272	0.101964	0.103078	0.100878	0.101486	0.105294	0.107063	0.10006	0.101865	0.0982154	0.109974	0.101304	0.0995264	0.102056	0.097987	0.100252	0.100497	0.0993922	0.107806
271	0.0996598	0.100946	0.0986444	0.099179	0.103152	0.104892	0.0979165	0.0996414	0.0960267	0.107689	0.0988791	0.0972492	0.0997322	0.0956859	0.0979944	0.0981468	0.0971235	0.10557
270	0.0972551	0.09861	0.09621	0.0967805	0.1007	0.102426	0.0955965	0.0972499	0.0935407	0.105447	0.0966148	0.094757	0.0971929	0.0931853	0.0955034	0.0955765	0.0946123	0.10291
269	0.0947805	0.0959951	0.0937275	0.0943597	0.0983142	0.0998698	0.0930476	0.0946649	0.0909973	0.102903	0.0940149	0.0920318	0.0945516	0.0906019	0.0928335	0.09301	0.0919417	0.100337
268	0.0919097	0.0931692	0.0909361	0.0914416	0.0954561	0.0970704	0.0901017	0.0917332	0.0881877	0.10011	0.0908598	0.0890177	0.0916323	0.087608	0.0897768	0.0901169	0.0888758	0.0973956
267	0.0890017	0.0904618	0.088107	0.088706	0.0926094	0.0943951	0.0873191	0.0890752	0.0853792	0.0973697	0.0880265	0.0861406	0.0888057	0.0845919	0.0868754	0.0872409	0.0860283	0.0945651
266	0.0864516	0.0880213	0.0855761	0.0862515	0.0901239	0.0920184	0.0848462	0.0866272	0.083021	0.0948099	0.0853388	0.083676	0.0863172	0.0821806	0.0843681	0.0846896	0.0834035	0.0921311
265	0.0838153	0.0852515	0.0830811	0.0836406	0.0876327	0.0893156	0.0821963	0.0839588	0.0804202	0.0921675	0.082622	0.0808406	0.0836437	0.079372	0.0816103	0.0819426	0.0805856	0.0893875
264	0.0809385	0.0823971	0.0802728	0.0808265	0.0849194	0.0865047	0.0793942	0.0811842	0.0776752	0.0891914	0.0796371	0.077762	0.0804868	0.0762924	0.0786586	0.0789308	0.0774955	0.0865028
263	0.0782105	0.0798522	0.0774533	0.0781638	0.0822469	0.083884	0.0767621	0.0786562	0.0749554	0.0865575	0.0767581	0.0748567	0.0777379	0.0734318	0.0757634	0.0761698	0.0746108	0.0838348
262	0.0759505	0.0775681	0.075148	0.0758087	0.079754	0.0815546	0.0744212	0.076285	0.0725114	0.0841759	0.0742544	0.0723689	0.0753523	0.070988	0.0731737	0.0737687	0.0722004	0.0813593
261	0.073693	0.0755234	0.0731604	0.0737274	0.077585	0.0794732	0.0722672	0.0741545	0.0704024	0.0819821	0.071958	0.0701745	0.0730911	0.0686962	0.0709433	0.071554	0.0698718	0.0791971
260	0.071598	0.0735618	0.0711014	0.0717738	0.0757439	0.0775434	0.070341	0.0723034	0.0686226	0.0799494	0.0699141	0.0679806	0.0710342	0.0666183	0.0688577	0.0694728	0.0677705	0.0773347
259	0.0695691	0.0714133	0.0691434	0.0696908	0.0736804	0.0755905	0.0683462	0.0701071	0.0665447	0.07779	0.0677272	0.0656492	0.0688147	0.0644885	0.0666355	0.0671811	0.0654642	0.0753251
258	0.0673009	0.0690628	0.0668744	0.0673459	0.0715224	0.0733649	0.0661592	0.0679483	0.0640691	0.0754275	0.0652691	0.0630998	0.0663196	0.0619381	0.0641914	0.0647426	0.0629679	0.0728982
257	0.0651639	0.0670754	0.0647487	0.0652395	0.0694999	0.0713028	0.0639267	0.0659737	0.0620366	0.0733406	0.0630885	0.0607739	0.0640649	0.0595811	0.0619844	0.0625656	0.0607384	0.0708346
256	0.0634489	0.0654272	0.0629678	0.0635885	0.0678278	0.0696709	0.062204	0.0642728	0.0603611	0.0714815	0.0611585	0.0588941	0.0622908	0.0577126	0.0600735	0.060786	0.0587979	0.0690347
255	0.0620877	0.0642145	0.061693	0.0623401	0.0666247	0.0684587	0.0610634	0.0631155	0.0591566	0.0702342	0.0597927	0.0576518	0.060891	0.0563504	0.0585989	0.0594447	0.05751	0.0678287
254	0.0613615	0.0634998	0.061056	0.0615314	0.0660239	0.0679983	0.0601726	0.0623388	0.0583607	0.0694977	0.0589198	0.0566898	0.0599644	0.0554195	0.0576814	0.0583904	0.0565772	0.0672056
253	0.0606962	0.0627911	0.060189	0.0608376	0.0652142	0.0672546	0.059302	0.0614788	0.0576626	0.0686115	0.057875	0.0557413	0.0591371	0.054451	0.0566726	0.0574083	0.0556555	0.0664154
252	0.0599811	0.0620868	0.0594403	0.06013	0.0645736	0.0666291	0.0587104	0.060802	0.056974	0.0678179	0.0570684	0.0548694	0.0583967	0.0535412	0.0558529	0.0566179	0.0547859	0.0657233
251	0.0596337	0.0618556	0.0591135	0.0598001	0.0642393	0.0663802	0.0583813	0.0604868	0.0563871	0.0675214	0.0565678	0.054228	0.0578498	0.0528756	0.0552473	0.0560484	0.0540818	0.0654258
250	0.0598136	0.0619606	0.0592132	0.0599611	0.0642652	0.0666965	0.0585161	0.0605674	0.0564042	0.0676997	0.0565455	0.0542015	0.0577895	0.0528298	0.0551219	0.0559945	0.0540592	0.0655036
