# Supplementary material for: Coral anthozoan-specific opsins employ a novel chloride counterion for spectral tuning
Source: eLife. 2025 Sep 1;14:RP105451. doi: 10.7554/eLife.105451 (PMC12401545; doi:10.7554/eLife.105451)
Supplement: Figure 3—source data 1. [file elife-105451-fig3-data1.xlsx]

## Sheet: Sheet1
pH_Antho2a_WT_0.28NaCl	rel_abs_Antho2a_WT_0.28NaCl	pH_Antho2a_WT_2.8NaCl	rel_peak_abs_Antho2a_WT_2.8NaCl	pH_Antho2a_WT_28NaCl	rel_peak_abs_Antho2a_WT_28NaCl	pH_Antho2a_WT_140NaCl	rel_peak_abs_Antho2a_WT_140NaCl	pH_Antho2a_WT_500NaCl	rel_peak_abs_Antho2a_WT_500NaCl	pH_Antho2a_E292A_2.8NaCl	rel_peak_abs_Antho2a_E292A_2.8NaCl	pH_Antho2a_E292A_28NaCl	rel_peak_abs_Antho2a_E292A_28NaCl	pH_Antho2a_E292A_140NaCl	rel_peak_abs_Antho2a_E292A_140NaCl	pH_Antho2a_E292A_500NaCl	rel_peak_abs_Antho2a_E292A_500NaCl	NaCl concentration	rel_peak_abs_Antho2a_WT	rel_peak_abs_Antho2a_E292A
4.9	1	5	1	4.9	1	6.5	1	6.5	1	4.9	1	4.8	1	5.3	1	5	1	0	0.346794	0.0379558
5.8	0.97165	6.6	0.95288	6.6	0.977785	7.6	0.991526	7.3	0.983772	5.3	0.830917	5.3	0.957952	6.5	0.959509	6.5	0.968053	0.042	0.430491	0.0766931
6.6	0.821824	7.4	0.797566	7.3	0.968425	8.7	0.53897	8.4	0.902505	6.5	0.297978	6.5	0.661889	7.3	0.697214	7.3	0.937286	0.14	0.563733	0.0549936
7.4	0.380411	8.3	0.363919	8.3	0.760157	9.2	0.231665	9.1	0.434165			7.3	0.196918	7.9	0.407249	8.5	0.670916	0.42	0.719567	0.0864191
8.4	0.178054	8.7	0.207145	9	0.351775	9.6	0.112375	10	0.101378					8.4	0.158612	9.3	0.294601	1.4	0.890617	0.150877
						10.3	0.0422067											4.2	0.97634	0.253214
																		14	0.990966	0.563881
																		42	0.991269	0.824376
																		140	0.993536	0.955509
																		420	1	1
