# Supplementary material for: Coral anthozoan-specific opsins employ a novel chloride counterion for spectral tuning
Source: eLife. 2025 Sep 1;14:RP105451. doi: 10.7554/eLife.105451 (PMC12401545; doi:10.7554/eLife.105451)
Supplement: Figure 5—figure supplement 1—source data 1. [file elife-105451-fig5-figsupp1-data1.xlsx]

## Sheet: Sheet1
II1_WT_510_01	II1_WT_510_02	II1_WT_510_03	II1_WT_510_04	II1_E292A_510_01	II1_E292A_510_02	II1_E292A_510_03	II1_E292A_510_04		rel_II1_WT_510_01	rel_II1_WT_510_02	rel_II1_WT_510_03	rel_II1_WT_510_04	mean_rel_Antho2a_WT_250403	se_rel_Antho2a_WT_250403	rel_II1_E292A_510_01	rel_II1_E292A_510_02	rel_II1_E292A_510_03	rel_II1_E292A_510_04	mean_rel_Antho2a_E292A_250403	se_rel_Antho2a_E292A_250403	rel_time		expression ratio (WT/E292A) at pH 7.0		rel_II1_E292A_510_01_norm	rel_II1_E292A_510_02_norm	rel_II1_E292A_510_03_norm	rel_II1_E292A_510_04_norm			max response	WT_01	WT_02	WT_03	WT_04
73651	70312	74694	66017	70546	74180	73580	73841		1.03429	1.0065	1.02894	1.00795	1.01942	0.0071315	1.22359	1.01636	1.01657	1.01662	1.06828	0.0517687	-1		0.731141		1.67353	1.3901	1.39038	1.39045				26.6992	33.0934	28.6459	32.411	30.2124
72893	69817	74843	66085	69916	73810	73273	72840		1.02365	0.999413	1.03099	1.00899	1.01576	0.00711421	1.21266	1.01129	1.01232	1.00284	1.05978	0.0510055	-0.983333				1.65859	1.38317	1.38458	1.3716
72623	70759	74371	65509	70183	74122	73182	73742		1.01986	1.0129	1.02449	1.0002	1.01436	0.00528817	1.21729	1.01556	1.01107	1.01525	1.06479	0.050843	-0.966667				1.66492	1.38901	1.38286	1.38859				E292A_01	E292A_02	E292A_03	E292A_04
72570	69675	74646	65641	70392	73519	73147	73356		1.01911	0.99738	1.02828	1.00221	1.01175	0.00721634	1.22092	1.0073	1.01058	1.00994	1.06219	0.0529153	-0.95				1.66988	1.37771	1.3822	1.38132				3.87403	2.9417	3.30103	4.53749
72822	69960	74287	65753	70379	74051	73337	73905		1.02265	1.00146	1.02334	1.00392	1.01284	0.00588376	1.22069	1.01459	1.01321	1.0175	1.0665	0.0514059	-0.933333				1.66957	1.38768	1.38579	1.39166
72575	69995	73976	65696	69951	73875	72903	72983		1.01918	1.00196	1.01905	1.00305	1.01081	0.0048001	1.21327	1.01218	1.00721	1.0048	1.05937	0.0513237	-0.916667				1.65942	1.38438	1.37759	1.3743				E292A_01_norm	E292A_02_norm	E292A_03_norm	E292A_04_norm
72118	69927	73997	65418	69792	73442	72917	73123		1.01277	1.00099	1.01934	0.998809	1.00798	0.00487307	1.21051	1.00625	1.00741	1.00673	1.05772	0.0509295	-0.9				1.65565	1.37627	1.37785	1.37693				5.2986	4.02344	4.5149	6.20604
72280	69933	74240	65685	70235	73097	72821	73684		1.01504	1.00107	1.02269	1.00289	1.01042	0.0051314	1.21819	1.00152	1.00608	1.01446	1.06006	0.0527786	-0.883333				1.66615	1.3698	1.37604	1.3875
72164	70407	74348	66318	70301	73594	73049	73681		1.01341	1.00786	1.02418	1.01255	1.0145	0.00344861	1.21934	1.00833	1.00923	1.01441	1.06283	0.0521875	-0.866667				1.66772	1.37912	1.38035	1.38744
72128	69945	74371	65521	69707	73628	73072	73630		1.01291	1.00125	1.02449	1.00038	1.00976	0.00568184	1.20904	1.0088	1.00955	1.01371	1.06027	0.0495996	-0.85				1.65363	1.37976	1.38078	1.38648
71892	69807	74131	65686	70450	74189	73198	72800		1.00959	0.99927	1.02119	1.0029	1.00824	0.00481671	1.22192	1.01648	1.01129	1.00229	1.06299	0.0530574	-0.833333				1.67126	1.39027	1.38316	1.37085
71549	70137	73785	65885	69882	74115	73450	73079		1.00477	1.00399	1.01642	1.00594	1.00778	0.00290704	1.21207	1.01547	1.01477	1.00613	1.06211	0.0500327	-0.816667				1.65778	1.38888	1.38792	1.3761
71770	69709	73929	65267	69762	74324	72681	73628		1.00788	0.997867	1.0184	0.996504	1.00516	0.00509011	1.20999	1.01833	1.00414	1.01369	1.06154	0.0495721	-0.8				1.65493	1.3928	1.37339	1.38644
71253	70075	73517	65886	69985	74074	72717	73320		1.00062	1.00311	1.01273	1.00595	1.0056	0.00261376	1.21386	1.01491	1.00464	1.00944	1.06071	0.0510915	-0.783333				1.66022	1.38811	1.37407	1.38064
72042	70329	74008	65781	69975	74017	73189	73321		1.0117	1.00674	1.01949	1.00435	1.01057	0.00334416	1.21368	1.01413	1.01116	1.00946	1.06211	0.0505348	-0.766667				1.65999	1.38705	1.38299	1.38066
71985	69868	73821	65913	70245	73435	72276	72365		1.0109	1.00014	1.01692	1.00637	1.00858	0.00354662	1.21837	1.00615	0.998549	0.996297	1.05484	0.0545496	-0.75				1.66639	1.37614	1.36574	1.36266
71204	69569	73738	65322	69898	73609	73229	72746		0.99993	0.995863	1.01577	0.997343	1.00223	0.00459273	1.21235	1.00854	1.01172	1.00154	1.05854	0.0513152	-0.733333				1.65816	1.3794	1.38375	1.36983
71818	69919	73729	65933	70353	73641	72310	72806		1.00855	1.00087	1.01565	1.00667	1.00794	0.00304616	1.22024	1.00897	0.999019	1.00237	1.05765	0.0542363	-0.716667				1.66895	1.38	1.36638	1.37096
71964	69627	73728	65536	70060	74258	72820	72936		1.0106	0.996693	1.01564	1.00061	1.00589	0.00437441	1.21516	1.01743	1.00607	1.00416	1.0607	0.0515688	-0.7				1.662	1.39156	1.37602	1.37341
71704	69959	74238	65481	69849	72827	72814	73184		1.00695	1.00145	1.02266	0.999771	1.00771	0.00521507	1.2115	0.997822	1.00598	1.00757	1.05572	0.0519708	-0.683333				1.657	1.36475	1.37591	1.37808
71649	69801	73816	65578	69869	73454	73128	73042		1.00618	0.999184	1.01685	1.00125	1.00587	0.00394362	1.21185	1.00641	1.01032	1.00562	1.05855	0.0511094	-0.666667				1.65747	1.37649	1.38184	1.37541
71759	69941	73237	65803	70115	73340	73086	73093		1.00772	1.00119	1.00887	1.00469	1.00562	0.00172019	1.21611	1.00485	1.00974	1.00632	1.05926	0.0522958	-0.65				1.66331	1.37436	1.38105	1.37637
71356	70093	73262	65341	69710	73075	73094	72934		1.00206	1.00336	1.00922	0.997633	1.00307	0.00238789	1.20909	1.00122	1.00985	1.00413	1.05607	0.0510369	-0.633333				1.6537	1.36939	1.3812	1.37337
72033	69706	73729	65098	69352	73663	73179	72726		1.01157	0.997824	1.01565	0.993923	1.00474	0.00524805	1.20288	1.00928	1.01102	1.00127	1.05611	0.0489686	-0.616667				1.64521	1.38041	1.3828	1.36946
72142	69339	73806	65975	69584	73345	73080	72611		1.0131	0.992571	1.01671	1.00731	1.00742	0.00531585	1.2069	1.00492	1.00966	0.999683	1.05529	0.0505785	-0.6				1.65071	1.37445	1.38093	1.36729
71978	70269	73505	66007	70142	72745	72776	72844		1.0108	1.00588	1.01256	1.0078	1.00926	0.00149465	1.21658	0.996698	1.00546	1.00289	1.05541	0.0537563	-0.583333				1.66395	1.36321	1.37519	1.37168
71615	69351	73594	65484	69480	73456	73002	73084		1.0057	0.992742	1.01379	0.999817	1.00301	0.00446333	1.2051	1.00644	1.00858	1.0062	1.05658	0.0495098	-0.566667				1.64824	1.37653	1.37946	1.3762
71957	70047	73231	65239	69671	73813	73483	73483		1.0105	1.00271	1.00879	0.996076	1.00452	0.00327396	1.20841	1.01133	1.01522	1.01169	1.06166	0.0489239	-0.55				1.65278	1.38322	1.38855	1.38371
71820	69684	73523	65731	69629	73431	73006	73333		1.00858	0.997509	1.01281	1.00359	1.00562	0.00329634	1.20768	1.0061	1.00863	1.00962	1.05801	0.0498968	-0.533333				1.65178	1.37606	1.37953	1.38089
72008	69629	73495	65702	69745	73232	73261	73151		1.01122	0.996722	1.01243	1.00315	1.00588	0.00368231	1.2097	1.00337	1.01216	1.00712	1.05809	0.0505688	-0.516667				1.65453	1.37233	1.38435	1.37746
71348	69364	72951	65729	69718	73613	73006	73539		1.00195	0.992929	1.00493	1.00356	1.00084	0.00270731	1.20923	1.00859	1.00863	1.01246	1.05973	0.0498413	-0.5				1.65389	1.37947	1.37953	1.38477
71498	69339	73749	65773	69614	73599	72416	72954		1.00406	0.992571	1.01592	1.00423	1.0042	0.00476729	1.20742	1.0084	1.00048	1.00441	1.05518	0.0507742	-0.483333				1.65142	1.37921	1.36839	1.37375
71803	69649	73626	66092	69504	73940	73033	72867		1.00834	0.997008	1.01423	1.0091	1.00717	0.00363092	1.20552	1.01307	1.00901	1.00321	1.0577	0.0493132	-0.466667				1.64881	1.3856	1.38005	1.37211
71189	69910	73694	65757	69704	73327	73279	73414		0.999719	1.00074	1.01517	1.00398	1.0049	0.0035397	1.20898	1.00467	1.01241	1.01074	1.0592	0.0499556	-0.45				1.65356	1.37412	1.38469	1.38241
71612	69788	73638	65823	69721	73460	72998	72686		1.00566	0.998998	1.0144	1.00499	1.00601	0.0031707	1.20928	1.00649	1.00852	1.00072	1.05625	0.0510354	-0.433333				1.65396	1.37661	1.37938	1.3687
71162	69733	73885	65774	70011	73929	72961	72882		0.99934	0.998211	1.0178	1.00424	1.0049	0.00449486	1.21431	1.01292	1.00801	1.00341	1.05966	0.0515848	-0.416667				1.66084	1.3854	1.37868	1.37239
71458	68946	73217	65904	69443	73109	72800	72693		1.0035	0.986945	1.0086	1.00623	1.00132	0.00490256	1.20446	1.00169	1.00579	1.00081	1.05319	0.0504355	-0.4				1.64737	1.37003	1.37564	1.36884
71285	69987	73398	65670	69850	73585	72992	72798		1.00107	1.00185	1.01109	1.00266	1.00416	0.00233079	1.21152	1.00821	1.00844	1.00226	1.05761	0.0513236	-0.383333				1.65702	1.37895	1.37927	1.37081
70971	69532	73126	65958	69749	73569	73034	72734		0.996658	0.995333	1.00734	1.00705	1.0016	0.0032457	1.20976	1.00799	1.00902	1.00138	1.05704	0.0509372	-0.366667				1.65463	1.37865	1.38006	1.36961
70732	69546	73196	65602	70316	73410	72936	72752		0.993301	0.995534	1.00831	1.00162	0.99969	0.00336715	1.2196	1.00581	1.00767	1.00162	1.05868	0.0536562	-0.35				1.66808	1.37567	1.37821	1.36995
70954	69647	73398	65865	69334	73377	73027	72834		0.996419	0.99698	1.01109	1.00563	1.00253	0.00354784	1.20257	1.00536	1.00892	1.00275	1.0549	0.0492384	-0.333333				1.64478	1.37505	1.37993	1.37149
71170	69721	73466	65955	69971	73295	72824	73202		0.999452	0.998039	1.01203	1.00701	1.00413	0.00328648	1.21362	1.00423	1.00612	1.00782	1.05795	0.0518945	-0.316667				1.65989	1.37352	1.3761	1.37842
70873	69227	73063	66055	69914	72800	73013	72734		0.995281	0.990967	1.00647	1.00853	1.00031	0.00426438	1.21263	0.997452	1.00873	1.00138	1.05505	0.0525787	-0.3				1.65854	1.36424	1.37967	1.36961
71244	69857	73715	65816	69680	73060	72781	72748		1.00049	0.999986	1.01546	1.00489	1.0052	0.00358985	1.20857	1.00101	1.00553	1.00157	1.05417	0.051476	-0.283333				1.65299	1.36911	1.37528	1.36987
70824	69215	73022	65886	69866	73573	72779	73025		0.994593	0.990796	1.00591	1.00595	0.999313	0.00389922	1.21179	1.00804	1.0055	1.00538	1.05768	0.0513752	-0.266667				1.6574	1.37872	1.37525	1.37509
71292	70018	73507	66034	69540	73482	72412	72597		1.00117	1.00229	1.01259	1.00821	1.00607	0.00266859	1.20614	1.0068	1.00043	0.999491	1.05321	0.0510013	-0.25				1.64967	1.37702	1.36831	1.36703
71480	69895	73603	65460	69576	73628	72813	72002		1.00381	1.00053	1.01391	0.99945	1.00442	0.00329558	1.20676	1.0088	1.00597	0.991299	1.05321	0.0513292	-0.233333				1.65052	1.37976	1.37589	1.35582
71074	69456	73422	65819	69563	72532	72632	72625		0.998104	0.994245	1.01142	1.00493	1.00218	0.0037916	1.20654	0.99378	1.00347	0.999876	1.05092	0.051913	-0.216667				1.65021	1.35922	1.37247	1.36756
71199	69708	73782	65993	69177	72995	72207	73059		0.99986	0.997853	1.01638	1.00759	1.00542	0.0042129	1.19984	1.00012	0.997596	1.00585	1.05085	0.0496934	-0.2				1.64106	1.36789	1.36444	1.37573
70780	69391	73133	65611	70139	72965	72782	72763		0.993975	0.993315	1.00744	1.00176	0.999121	0.00337037	1.21653	0.999712	1.00554	1.00178	1.05589	0.0535602	-0.183333				1.66388	1.36733	1.3753	1.37015
71535	69201	73083	65508	69729	73123	72539	72554		1.00458	0.990595	1.00675	1.00018	1.00053	0.00358114	1.20942	1.00188	1.00218	0.998899	1.05309	0.0521132	-0.166667				1.65415	1.37029	1.37071	1.36622
71218	69841	73281	65184	69321	73192	72518	72555		1.00013	0.999757	1.00948	0.995236	1.00115	0.00299037	1.20234	1.00282	1.00189	0.998912	1.05149	0.05029	-0.15				1.64447	1.37159	1.37031	1.36624
71060	69601	73436	65175	69631	73668	72856	72557		0.997908	0.996321	1.01161	0.995099	1.00024	0.00383587	1.20772	1.00934	1.00656	0.99894	1.05564	0.05074	-0.133333				1.65183	1.38051	1.3767	1.36627
71455	69945	72988	65441	69657	73389	72018	73160		1.00345	1.00125	1.00544	0.99916	1.00233	0.00135918	1.20817	1.00552	0.994985	1.00724	1.05398	0.051468	-0.116667				1.65244	1.37528	1.36087	1.37763
71144	69885	72883	64987	69517	73661	72283	72803		0.999087	1.00039	1.00399	0.992229	0.998924	0.00246151	1.20574	1.00925	0.998646	1.00233	1.05399	0.0506312	-0.1				1.64912	1.38037	1.36587	1.37091
70925	69766	73017	65332	69621	73264	72371	72791		0.996012	0.998683	1.00584	0.997496	0.999508	0.00218053	1.20754	1.00381	0.999862	1.00216	1.05334	0.0514066	-0.0833333				1.65159	1.37293	1.36754	1.37068
71279	69977	72844	65085	69303	73160	72282	73079		1.00098	1.0017	1.00346	0.993725	0.999967	0.0021447	1.20203	1.00238	0.998632	1.00613	1.05229	0.0499355	-0.0666667				1.64405	1.37099	1.36585	1.3761
70832	70008	73345	64944	69857	73255	72158	72567		0.994706	1.00215	1.01036	0.991572	0.999696	0.0041894	1.21164	1.00369	0.996919	0.999078	1.05283	0.0529548	-0.05				1.65719	1.37277	1.36351	1.36646
71330	69959	73156	65509	69425	73136	72337	72542		1.0017	1.00145	1.00776	1.0002	1.00277	0.00169235	1.20415	1.00206	0.999392	0.998733	1.05108	0.0510263	-0.0333333				1.64694	1.37054	1.36689	1.36599
71209	69858	72593	65496	57655	72986	72381	72634		1	1	1	1	1	0	1	1	1	1	1	0	-0.0166667				1.36772	1.36772	1.36772	1.36772
																					0
																					0.0166667
1532103	1965221	1581910	1521811	153301	153232	147638	226441		21.5156	28.1317	21.7915	23.2352	23.6685	1.53476	2.65894	2.09947	2.03973	3.11756	2.47893	0.254482	0.0333333				3.63669	2.8715	2.7898	4.26397
1638551	2110031	1740744	1720338	173496	172586	170681	259287		23.0104	30.2046	23.9795	26.2663	25.8652	1.59939	3.00921	2.36465	2.35809	3.56977	2.82543	0.291341	0.05				4.11577	3.23418	3.22522	4.88247
1736305	2216110	1875898	1887635	190316	186804	190077	286382		24.3832	31.7231	25.8413	28.8206	27.6921	1.63035	3.30095	2.55945	2.62606	3.94281	3.10732	0.324975	0.0666667				4.51478	3.50062	3.59173	5.39268
1812442	2282913	1982765	2010494	203435	198235	205626	305418		25.4524	32.6793	27.3134	30.6964	29.0354	1.62891	3.52849	2.71607	2.84088	4.20489	3.32258	0.344088	0.0833333				4.826	3.71483	3.88555	5.75113
1869611	2311836	2049833	2089758	212359	206951	218080	318288		26.2553	33.0934	28.2373	31.9067	29.8732	1.58823	3.68327	2.83549	3.01295	4.38208	3.47845	0.352206	0.1				5.0377	3.87817	4.12088	5.99348
1895440	2300772	2079493	2122792	217369	211972	226968	325373		26.618	32.935	28.6459	32.411	30.1525	1.51673	3.77017	2.90428	3.13574	4.47962	3.57245	0.353461	0.116667				5.15655	3.97226	4.28883	6.12689
1901220	2254773	2072049	2112368	221938	214215	235258	329576		26.6992	32.2765	28.5434	32.2519	29.9427	1.39217	3.84941	2.93501	3.25027	4.53749	3.64305	0.353341	0.133333				5.26494	4.01429	4.44548	6.20604
1877393	2183023	2031608	2067004	223357	214703	238932	326400		26.3645	31.2494	27.9863	31.5592	29.2899	1.26645	3.87403	2.9417	3.30103	4.49376	3.65263	0.339799	0.15				5.2986	4.02344	4.5149	6.14623
1833878	2084644	1966158	1992616	221121	211660	238270	319572		25.7535	29.8412	27.0847	30.4235	28.2757	1.1122	3.83524	2.90001	3.29189	4.39976	3.60672	0.32656	0.166667				5.24556	3.96641	4.50239	6.01766
1770758	1980665	1882333	1900522	218829	207039	236191	311136		24.8671	28.3527	25.93	29.0174	27.0418	0.982648	3.79549	2.83669	3.26316	4.28361	3.54474	0.314831	0.183333				5.19119	3.87982	4.46311	5.85881
1690925	1855531	1783775	1792252	213974	202174	231794	301344		23.7459	26.5615	24.5723	27.3643	25.561	0.842853	3.71128	2.77004	3.20241	4.1488	3.45813	0.299996	0.2				5.07601	3.78865	4.38002	5.67442
1604106	1733677	1674223	1674669	208046	195605	225199	286634		22.5267	24.8172	23.0631	25.569	23.994	0.717499	3.60846	2.68003	3.1113	3.94628	3.33652	0.278007	0.216667				4.93539	3.66555	4.2554	5.39742
1508962	1607199	1562067	1555973	201552	188580	217351	272953		21.1906	23.0067	21.5181	23.7568	22.368	0.608622	3.49583	2.58378	3.00287	3.75792	3.2101	0.260923	0.233333				4.78133	3.5339	4.10711	5.13981
1413135	1485954	1449039	1433522	192881	180190	208443	257674		19.8449	21.2711	19.9611	21.8872	20.7411	0.500488	3.34543	2.46883	2.8798	3.54757	3.06041	0.241721	0.25				4.57563	3.37668	3.93878	4.8521
1312015	1365931	1334114	1316353	184998	172241	199519	242447		18.4248	19.553	18.378	20.0982	19.1135	0.426029	3.20871	2.35992	2.75651	3.33793	2.91577	0.223302	0.266667				4.38863	3.22772	3.77015	4.56537
1214209	1251055	1225950	1205966	176607	164666	190205	227531		17.0513	17.9085	16.888	18.4128	17.5652	0.36044	3.06317	2.25613	2.62783	3.13257	2.76992	0.204466	0.283333				4.18957	3.08577	3.59415	4.28449
1121079	1145730	1122108	1099349	168929	156859	179623	213376		15.7435	16.4008	15.4575	16.785	16.0967	0.3027	2.93	2.14917	2.48163	2.93769	2.62462	0.190999	0.3				4.00743	2.93947	3.39419	4.01795
1032427	1043830	1026242	999264	160736	148774	171331	199330		14.4985	14.9422	14.1369	15.2569	14.7086	0.245982	2.78789	2.03839	2.36707	2.74431	2.48442	0.176151	0.316667				3.81307	2.78796	3.2375	3.75346
947219	954706	933947	907017	152912	141466	161155	187014		13.302	13.6664	12.8655	13.8484	13.4206	0.217109	2.65219	1.93826	2.22648	2.57474	2.34792	0.164974	0.333333				3.62747	2.65101	3.04521	3.52154
869384	869719	851021	824593	144499	134836	152640	174076		12.2089	12.4498	11.7232	12.59	12.243	0.190293	2.50627	1.84742	2.10884	2.39662	2.21479	0.148382	0.35				3.42789	2.52677	2.88431	3.27791
795733	791926	774622	749270	137727	128281	144555	163114		11.1746	11.3362	10.6708	11.4399	11.1554	0.170516	2.38881	1.75761	1.99714	2.2457	2.09732	0.139171	0.366667				3.26724	2.40393	2.73154	3.0715
727499	721431	705638	678343	130918	122083	136954	152875		10.2164	10.3271	9.72047	10.357	10.1552	0.148047	2.27071	1.67269	1.89213	2.10473	1.98507	0.129785	0.383333				3.10571	2.28778	2.58791	2.87869
664499	657812	639592	615232	125458	117279	129501	144425		9.33167	9.41642	8.81066	9.39343	9.23804	0.143581	2.17601	1.60687	1.78916	1.98839	1.89011	0.123091	0.4				2.97619	2.19776	2.44708	2.71958
606787	600473	583236	559386	119287	112284	123573	136140		8.52121	8.59562	8.03433	8.54077	8.42298	0.130505	2.06898	1.53843	1.70726	1.87433	1.79725	0.113601	0.416667				2.82979	2.10415	2.33506	2.56357
554977	547650	531628	507747	114515	108547	117574	128363		7.79364	7.83947	7.32341	7.75234	7.67721	0.119271	1.98621	1.48723	1.62438	1.76726	1.71627	0.106603	0.433333				2.71659	2.03412	2.2217	2.41712
508757	499190	484505	461818	109615	103873	112043	121791		7.14456	7.14578	6.67427	7.05109	7.00392	0.112101	1.90122	1.42319	1.54796	1.67678	1.63729	0.102078	0.45				2.60035	1.94653	2.11719	2.29337
464930	456817	443375	421205	105081	100842	107407	116250		6.52909	6.53922	6.10768	6.431	6.40175	0.101014	1.82258	1.38166	1.48391	1.60049	1.57216	0.0946886	0.466667				2.49279	1.88973	2.02958	2.18903
425290	418404	405471	384427	101557	97384	103854	110754		5.97242	5.98935	5.58554	5.86947	5.8542	0.093387	1.76146	1.33428	1.43482	1.52482	1.51385	0.0912509	0.483333				2.40919	1.82493	1.96244	2.08554
391348	384470	372096	351551	97723	94697	99968	105907		5.49577	5.50359	5.12578	5.36752	5.37317	0.0881627	1.69496	1.29747	1.38114	1.45809	1.45791	0.0855518	0.5				2.31824	1.77458	1.88901	1.99427
360277	353112	341715	320887	94583	92382	97321	102238		5.05943	5.05471	4.70727	4.89934	4.93019	0.0830928	1.6405	1.26575	1.34457	1.40758	1.4146	0.0806955	0.516667				2.24375	1.7312	1.839	1.92518
332646	325689	313840	295927	92377	89740	93820	98524		4.6714	4.66216	4.32328	4.51825	4.54377	0.0814312	1.60224	1.22955	1.2962	1.35644	1.37111	0.0812845	0.533333				2.19142	1.68169	1.77284	1.85524
305696	301663	290228	272586	90131	87723	90912	95906		4.29294	4.31823	3.99802	4.16187	4.19277	0.0734043	1.56328	1.20192	1.25602	1.3204	1.3354	0.0797257	0.55				2.13814	1.64389	1.71789	1.80595
282294	279245	267384	253620	87772	86999	90086	93166		3.9643	3.99732	3.68333	3.8723	3.87931	0.0704793	1.52237	1.192	1.24461	1.28268	1.31041	0.073056	0.566667				2.08218	1.63032	1.70228	1.75435
264166	259764	250844	234194	85509	85348	87508	90723		3.70973	3.71846	3.45548	3.5757	3.61484	0.0623608	1.48312	1.16937	1.20899	1.24904	1.27763	0.0703987	0.583333				2.02849	1.59938	1.65357	1.70835
245432	242901	232675	218764	83736	83797	85781	88513		3.44664	3.47707	3.2052	3.34011	3.36726	0.0614818	1.45236	1.14812	1.18513	1.21862	1.25106	0.0686282	0.6				1.98643	1.57032	1.62093	1.66673
228657	226846	217789	204566	82283	83010	84642	86755		3.21107	3.24724	3.00014	3.12334	3.14545	0.0549793	1.42716	1.13734	1.1694	1.19441	1.23208	0.0660684	0.616667				1.95196	1.55557	1.59941	1.63363
213550	212597	203836	191586	80668	81627	83846	85555		2.99892	3.04327	2.80793	2.92516	2.94382	0.0514308	1.39915	1.11839	1.1584	1.17789	1.21346	0.0631239	0.633333				1.91365	1.52965	1.58437	1.61103
200460	200877	192115	179821	79782	80866	82466	84523		2.81509	2.8755	2.64647	2.74553	2.77065	0.0491785	1.38378	1.10797	1.13933	1.16368	1.19869	0.0627422	0.65				1.89263	1.51539	1.55829	1.5916
189528	189631	181159	169624	78072	79535	81951	82966		2.66157	2.71452	2.49554	2.58984	2.61537	0.047413	1.35412	1.08973	1.13222	1.14225	1.17958	0.0592843	0.666667				1.85207	1.49045	1.54856	1.56228
179367	179010	171017	160154	78269	79109	80290	82364		2.51888	2.56248	2.35583	2.44525	2.47061	0.0452657	1.35754	1.08389	1.10927	1.13396	1.17117	0.0629601	0.683333				1.85674	1.48247	1.51717	1.55094
169543	170619	163372	152055	76760	78714	79136	80636		2.38092	2.44237	2.25052	2.32159	2.34885	0.0410143	1.33137	1.07848	1.09333	1.11017	1.15334	0.0596959	0.7				1.82094	1.47507	1.49537	1.51841
161332	161479	155814	145147	76245	78200	78159	80030		2.26561	2.31153	2.14641	2.21612	2.23492	0.035355	1.32244	1.07144	1.07983	1.10183	1.14388	0.0598617	0.716667				1.80873	1.46543	1.47691	1.50699
152878	155441	148478	138540	75508	78144	77729	79671		2.14689	2.2251	2.04535	2.11524	2.13315	0.0372751	1.30965	1.07067	1.07389	1.09688	1.13777	0.0575895	0.733333				1.79124	1.46438	1.46878	1.50023
147195	148450	143580	133229	75269	76953	76701	78904		2.06708	2.12503	1.97788	2.03415	2.05104	0.0307804	1.30551	1.05435	1.05968	1.08632	1.12647	0.0600883	0.75				1.78557	1.44206	1.44936	1.48579
141112	142064	137536	127713	74386	76608	76625	78592		1.98166	2.03361	1.89462	1.94994	1.96496	0.0291055	1.29019	1.04963	1.05863	1.08203	1.12012	0.0571003	0.766667				1.76463	1.4356	1.44792	1.47992
134900	137377	132205	123318	74293	76309	76372	77553		1.89442	1.96652	1.82118	1.88283	1.89124	0.0297991	1.28858	1.04553	1.05514	1.06772	1.11424	0.0582894	0.783333				1.76242	1.43	1.44314	1.46035
129822	132899	128184	118671	73747	75547	75905	76894		1.82311	1.90242	1.76579	1.81188	1.8258	0.0283904	1.27911	1.03509	1.04869	1.05865	1.10538	0.0581092	0.8				1.74947	1.41572	1.43432	1.44794
124946	128951	124679	114991	73165	75684	75621	76871		1.75464	1.8459	1.71751	1.7557	1.76844	0.027306	1.26901	1.03697	1.04476	1.05833	1.10227	0.0557566	0.816667				1.73566	1.41828	1.42895	1.44751
121401	124103	120993	111380	73172	74852	74711	76182		1.70485	1.7765	1.66673	1.70056	1.71216	0.0230792	1.26914	1.02557	1.03219	1.04885	1.09394	0.0586051	0.833333				1.73583	1.40269	1.41175	1.43454
117648	120007	117883	108617	72398	74858	74839	76051		1.65215	1.71787	1.62389	1.65838	1.66307	0.0197473	1.25571	1.02565	1.03396	1.04704	1.09059	0.0552159	0.85				1.71747	1.40281	1.41417	1.43207
115030	118242	115214	106221	72260	74603	74110	75602		1.61539	1.6926	1.58712	1.62179	1.62923	0.0224284	1.25332	1.02215	1.02389	1.04086	1.08506	0.0562458	0.866667				1.71419	1.39803	1.4004	1.42361
111476	113918	112123	103708	72022	74672	74300	75687		1.56548	1.63071	1.54454	1.58342	1.58104	0.0183641	1.24919	1.0231	1.02651	1.04203	1.08521	0.0548152	0.883333				1.70855	1.39932	1.40399	1.42521
109331	111598	109025	101551	71705	74233	73832	74987		1.53535	1.5975	1.50187	1.55049	1.5463	0.0198598	1.24369	1.01709	1.02005	1.0324	1.0783	0.0552284	0.9				1.70103	1.39109	1.39514	1.41203
106444	109217	107280	99055	71488	74083	73867	75300		1.49481	1.56341	1.47783	1.51238	1.51211	0.0184993	1.23993	1.01503	1.02053	1.0367	1.07805	0.0541554	0.916667				1.69588	1.38828	1.3958	1.41793
104048	107003	105408	96806	71621	73866	73304	75249		1.46116	1.53172	1.45204	1.47804	1.48074	0.0178261	1.24223	1.01206	1.01275	1.036	1.07576	0.0557691	0.933333				1.69903	1.38422	1.38517	1.41697
102559	104997	103314	95253	70724	73921	73558	74819		1.44025	1.50301	1.4232	1.45433	1.4552	0.0171607	1.22668	1.01281	1.01626	1.03008	1.07146	0.0518738	0.95				1.67776	1.38525	1.38997	1.40887
100375	102910	100990	93409	70769	73908	73540	74357		1.40958	1.47313	1.39118	1.42618	1.42502	0.017558	1.22746	1.01263	1.01601	1.02372	1.06996	0.0525515	0.966667				1.67882	1.385	1.38963	1.40017
98972	101951	100416	92047	70712	73562	72792	74321		1.38988	1.4594	1.38327	1.40538	1.40949	0.0172724	1.22647	1.00789	1.00568	1.02323	1.06582	0.0536925	0.983333				1.67747	1.37852	1.37549	1.39949
97328	99459	97973	91307	71077	73670	72926	74539		1.36679	1.42373	1.34962	1.39409	1.38356	0.0162211	1.2328	1.00937	1.00753	1.02623	1.06898	0.0547674	1				1.68613	1.38054	1.37802	1.4036
95213	98567	97187	88952	70480	73463	72919	73859		1.33709	1.41096	1.33879	1.35813	1.36124	0.0172457	1.22244	1.00654	1.00743	1.01687	1.06332	0.0530929	1.01667				1.67197	1.37666	1.37789	1.39079
93906	97244	95897	89071	70526	72827	72608	74198		1.31874	1.39202	1.32102	1.35995	1.34793	0.0174758	1.22324	0.997822	1.00314	1.02153	1.06143	0.0541749	1.03333				1.67306	1.36475	1.37201	1.39718
92642	95146	94771	87415	69988	73268	71993	73620		1.30099	1.36199	1.30551	1.33466	1.32579	0.0141882	1.21391	1.00386	0.994639	1.01357	1.0565	0.0526133	1.05				1.6603	1.37301	1.36039	1.38629
91892	94044	94459	86118	70495	73589	72470	74058		1.29045	1.34622	1.30121	1.31486	1.31319	0.0120895	1.2227	1.00826	1.00123	1.01961	1.06295	0.0533856	1.06667				1.67232	1.37902	1.36941	1.39454
90308	93164	93222	85500	70247	73696	72663	73860		1.26821	1.33362	1.28417	1.30542	1.29786	0.0141491	1.2184	1.00973	1.0039	1.01688	1.06223	0.0521264	1.08333				1.66644	1.38103	1.37305	1.39081
89344	92523	92331	85075	70180	73235	72918	73769		1.25467	1.32444	1.2719	1.29893	1.28749	0.0153204	1.21724	1.00341	1.00742	1.01563	1.06092	0.0521673	1.1				1.66485	1.37239	1.37787	1.3891
88856	91253	91306	83654	69850	73297	72319	74197		1.24782	1.30626	1.25778	1.27724	1.27228	0.0128714	1.21152	1.00426	0.999143	1.02152	1.05911	0.0510272	1.11667				1.65702	1.37355	1.36655	1.39716
88273	89826	90332	83081	70220	73331	72281	73345		1.23963	1.28584	1.24436	1.26849	1.25958	0.0107946	1.21793	1.00473	0.998618	1.00979	1.05777	0.0534379	1.13333				1.6658	1.37419	1.36584	1.38111
86803	88835	89402	82798	69954	73351	72709	73155		1.21899	1.27165	1.23155	1.26417	1.24659	0.0126657	1.21332	1.005	1.00453	1.00717	1.05751	0.0519412	1.15				1.65949	1.37456	1.37392	1.37754
85697	88248	89104	81560	69694	72876	72154	73125		1.20346	1.26325	1.22745	1.24527	1.23485	0.0127648	1.20881	0.998493	0.996864	1.00676	1.05273	0.0520715	1.16667				1.65332	1.36566	1.36344	1.37697
85289	87696	88003	80884	69948	72892	72280	72409		1.19773	1.25535	1.21228	1.23495	1.22507	0.0126669	1.21322	0.998712	0.998605	0.996902	1.05186	0.0537875	1.18333				1.65935	1.36596	1.36582	1.36349
84397	86752	87878	80537	70232	72772	72261	73395		1.1852	1.24183	1.21056	1.22965	1.21681	0.0123463	1.21814	0.997068	0.998342	1.01048	1.05601	0.0541294	1.2				1.66608	1.36371	1.36546	1.38205
84083	85903	86753	79594	69934	72899	71707	72764		1.18079	1.22968	1.19506	1.21525	1.2052	0.0107968	1.21297	0.998808	0.990688	1.00179	1.05106	0.0540205	1.21667				1.65901	1.36609	1.35499	1.37017
83492	84770	85964	79783	70000	72592	72156	73648		1.17249	1.21346	1.18419	1.21814	1.19707	0.0111144	1.21412	0.994602	0.996891	1.01396	1.05489	0.0532505	1.23333				1.66058	1.36034	1.36347	1.38682
83044	84121	86185	78565	70207	72760	71854	73564		1.1662	1.20417	1.18724	1.19954	1.18929	0.0084844	1.21771	0.996904	0.992719	1.0128	1.05503	0.0543973	1.25				1.66549	1.36349	1.35777	1.38524
82173	83981	85653	78111	69702	73141	72073	72304		1.15397	1.20217	1.17991	1.19261	1.18216	0.0104452	1.20895	1.00212	0.995745	0.995457	1.05057	0.0528161	1.26667				1.65351	1.37063	1.3619	1.36151
82133	83873	84723	78086	69650	72076	72027	72967		1.15341	1.20062	1.1671	1.19223	1.17834	0.0109442	1.20805	0.987532	0.995109	1.00458	1.04882	0.053191	1.28333				1.65228	1.35067	1.36104	1.374
81021	82913	84239	76976	70114	72241	72211	72486		1.13779	1.18688	1.16043	1.17528	1.16509	0.0105889	1.2161	0.989793	0.997651	0.997962	1.05038	0.0552724	1.3				1.66328	1.35376	1.36451	1.36494
81099	83128	83868	76806	69880	72675	71475	72106		1.13889	1.18996	1.15532	1.17268	1.16421	0.0110114	1.21204	0.995739	0.987483	0.992731	1.047	0.0550397	1.31667				1.65773	1.3619	1.3506	1.35778
80448	82489	83241	76613	70193	72527	71924	72590		1.12974	1.18081	1.14668	1.16974	1.15674	0.0114679	1.21747	0.993711	0.993686	0.999394	1.05106	0.0554834	1.33333				1.66516	1.35912	1.35909	1.3669
80377	81511	83171	76384	69711	72613	71509	72484		1.12875	1.16681	1.14572	1.16624	1.15188	0.00913862	1.20911	0.994889	0.987953	0.997935	1.04747	0.0539189	1.35				1.65372	1.36074	1.35125	1.3649
79574	81247	82851	75800	69888	72353	71712	72760		1.11747	1.16303	1.14131	1.15732	1.14478	0.010199	1.21218	0.991327	0.990757	1.00173	1.049	0.0544509	1.36667				1.65792	1.35586	1.35508	1.3701
79734	80935	82505	75368	70041	72691	71280	72848		1.11972	1.15856	1.13654	1.15073	1.14139	0.00854067	1.21483	0.995958	0.984789	1.00295	1.04963	0.0551931	1.38333				1.66155	1.3622	1.34692	1.37175
78804	81124	81926	75504	69745	71961	71262	71963		1.10666	1.16127	1.12857	1.1528	1.13732	0.0123495	1.2097	0.985956	0.98454	0.990762	1.04274	0.0556683	1.4				1.65453	1.34852	1.34658	1.35509
78696	80708	81793	74753	69874	72322	71317	71917		1.10514	1.15532	1.12673	1.14134	1.13213	0.0107231	1.21193	0.990902	0.9853	0.990129	1.04457	0.0558028	1.41667				1.65759	1.35528	1.34762	1.35422
78973	79926	81463	75059	68983	71814	71671	72040		1.10903	1.14412	1.12219	1.14601	1.13034	0.00892538	1.19648	0.983942	0.990191	0.991822	1.04061	0.0519846	1.43333				1.63645	1.34576	1.35431	1.35654
78327	79428	81362	73813	69677	72212	71784	72235		1.09996	1.13699	1.1208	1.12698	1.12118	0.00782191	1.20852	0.989395	0.991752	0.994507	1.04604	0.054168	1.45				1.65292	1.35322	1.35644	1.36021
77607	79731	81453	74136	69166	71660	71490	72795		1.08985	1.14133	1.12205	1.13192	1.12129	0.011194	1.19965	0.981832	0.98769	1.00222	1.04285	0.0524437	1.46667				1.6408	1.34288	1.35089	1.37076
78045	79200	80716	73608	69571	72333	71889	72394		1.096	1.13373	1.1119	1.12385	1.11637	0.00812564	1.20668	0.991053	0.993203	0.996696	1.04691	0.0532695	1.48333				1.6504	1.35549	1.35843	1.36321
77374	78834	80546	73463	69184	71635	71167	72238		1.08658	1.12849	1.10956	1.12164	1.11157	0.00920342	1.19997	0.98149	0.983228	0.994548	1.03981	0.0534643	1.5				1.64122	1.34241	1.34478	1.36027
76868	78426	80693	73594	69299	72185	71310	72470		1.07947	1.12265	1.11158	1.12364	1.10934	0.0103234	1.20196	0.989025	0.985203	0.997742	1.04348	0.0528909	1.51667				1.64395	1.35271	1.34749	1.36464
76921	78227	79676	73152	68817	72283	71500	71720		1.08021	1.1198	1.09757	1.11689	1.10362	0.0092302	1.1936	0.990368	0.987828	0.987416	1.0398	0.0512697	1.53333				1.63252	1.35455	1.35108	1.35051
76969	78457	79959	73034	69309	72066	71641	72118		1.08089	1.12309	1.10147	1.11509	1.10514	0.00923271	1.20213	0.987395	0.989776	0.992896	1.04305	0.0530397	1.55				1.64419	1.35048	1.35374	1.35801
76711	77980	79727	72920	69082	72593	70984	72215		1.07727	1.11626	1.09827	1.11335	1.10129	0.00892543	1.1982	0.994615	0.980699	0.994231	1.04194	0.0521873	1.56667				1.6388	1.36036	1.34133	1.35983
76410	77276	78911	72444	68683	72295	71240	72616		1.07304	1.10619	1.08703	1.10608	1.09309	0.00805754	1.19128	0.990532	0.984236	0.999752	1.04145	0.0500437	1.58333				1.62934	1.35478	1.34616	1.36739
76459	77005	79256	71514	68479	72221	71356	72510		1.07373	1.10231	1.09179	1.09188	1.08993	0.00593726	1.18774	0.989519	0.985839	0.998293	1.04035	0.0491996	1.6				1.6245	1.35339	1.34836	1.36539
76279	77206	79246	71939	68890	72231	70884	72135		1.0712	1.10518	1.09165	1.09837	1.0916	0.00734065	1.19487	0.989656	0.979318	0.99313	1.03924	0.0519574	1.61667				1.63425	1.35358	1.33944	1.35833
75790	76638	78894	71266	69110	72186	70981	72545		1.06433	1.09705	1.0868	1.0881	1.08407	0.00696328	1.19868	0.989039	0.980658	0.998775	1.04179	0.0524287	1.63333				1.63947	1.35273	1.34127	1.36605
75307	76691	79785	71915	68620	72177	71705	72226		1.05755	1.09781	1.09907	1.09801	1.08811	0.0101908	1.19018	0.988916	0.990661	0.994383	1.04104	0.0497289	1.65				1.62784	1.35256	1.35495	1.36004
75417	76560	79414	71479	69174	72143	70671	72611		1.05909	1.09594	1.09396	1.09135	1.08509	0.00871479	1.19979	0.98845	0.976375	0.999683	1.04108	0.0531192	1.66667				1.64099	1.35193	1.33541	1.36729
75284	76355	78912	72166	68866	72091	71203	71936		1.05723	1.093	1.08705	1.10184	1.08478	0.00967371	1.19445	0.987737	0.983725	0.99039	1.03908	0.0518095	1.68333				1.63368	1.35095	1.34547	1.35458
74857	76462	78775	71152	68530	71585	71187	70882		1.05123	1.09453	1.08516	1.08636	1.07932	0.00959243	1.18862	0.980805	0.983504	0.975879	1.0322	0.0521637	1.7				1.62571	1.34147	1.34516	1.33473
75376	75706	78063	71640	68624	72186	71225	72026		1.05852	1.08371	1.07535	1.09381	1.07785	0.00746647	1.19025	0.989039	0.984029	0.991629	1.03874	0.0505296	1.71667				1.62794	1.35273	1.34588	1.35628
74769	75979	78273	71153	68872	72014	70561	71745		1.04999	1.08762	1.07824	1.08637	1.07556	0.00877113	1.19455	0.986682	0.974855	0.987761	1.03596	0.0529444	1.73333				1.63382	1.34951	1.33333	1.35098
74721	75259	78139	70809	68469	71628	71086	71687		1.04932	1.07731	1.0764	1.08112	1.07104	0.00731122	1.18756	0.981394	0.982109	0.986962	1.03451	0.051034	1.75				1.62426	1.34228	1.34325	1.34989
74804	75162	78098	70938	69426	71971	71022	72296		1.05049	1.07593	1.07583	1.08309	1.07133	0.00715415	1.20416	0.986093	0.981224	0.995347	1.04171	0.0542311	1.76667				1.64696	1.3487	1.34204	1.36136
74294	74876	77402	70064	70224	72123	70314	71384		1.04332	1.07183	1.06625	1.06974	1.06279	0.00658924	1.218	0.988176	0.971443	0.98279	1.0401	0.0594026	1.78333				1.66589	1.35155	1.32867	1.34419
74276	74789	77701	71158	70405	71662	71094	71631		1.04307	1.07059	1.07036	1.08645	1.06762	0.00900699	1.22114	0.98186	0.982219	0.986191	1.04285	0.059438	1.8				1.67019	1.34291	1.34341	1.34884
74359	75340	77529	70369	69852	71899	70628	71680		1.04424	1.07847	1.068	1.0744	1.06628	0.00765681	1.21155	0.985107	0.975781	0.986866	1.03983	0.0572934	1.81667				1.65707	1.34735	1.3346	1.34976
74079	74752	77659	70911	69946	71562	71059	72039		1.0403	1.07006	1.06979	1.08268	1.06571	0.00898541	1.21318	0.980489	0.981736	0.991808	1.0418	0.0571822	1.83333				1.6593	1.34104	1.34274	1.35652
74647	74899	77686	70729	69591	71951	71126	71624		1.04828	1.07216	1.07016	1.0799	1.06762	0.00678128	1.20702	0.985819	0.982661	0.986095	1.0404	0.055547	1.85				1.65088	1.34833	1.34401	1.34871
74617	74692	77426	70085	69088	71676	71005	71592		1.04786	1.0692	1.06658	1.07007	1.06342	0.00524123	1.1983	0.982051	0.980989	0.985654	1.03675	0.0538597	1.86667				1.63895	1.34318	1.34172	1.3481
73914	74836	77445	70157	68802	71820	70916	71677		1.03799	1.07126	1.06684	1.07116	1.06181	0.00800844	1.19334	0.984024	0.97976	0.986824	1.03599	0.052471	1.88333				1.63216	1.34587	1.34004	1.3497
73761	74549	77192	70139	68643	71705	70579	71577		1.03584	1.06715	1.06335	1.07089	1.05931	0.00797308	1.19058	0.982449	0.975104	0.985448	1.0334	0.0524405	1.9				1.62839	1.34372	1.33367	1.34782
74114	74354	76770	70171	68864	72016	70497	71513		1.0408	1.06436	1.05754	1.07138	1.05852	0.00654825	1.19442	0.98671	0.973971	0.984566	1.03492	0.0532394	1.91667				1.63363	1.34955	1.33212	1.34662
73923	74085	76846	69872	68566	71812	70542	71332		1.03811	1.06051	1.05859	1.06681	1.05601	0.00621747	1.18925	0.983915	0.974593	0.982075	1.03246	0.0523019	1.93333				1.62656	1.34572	1.33297	1.34321
73490	74203	76894	69646	68450	71519	70812	71817		1.03203	1.0622	1.05925	1.06336	1.05421	0.00744311	1.18723	0.9799	0.978323	0.988752	1.03355	0.0512787	1.95				1.62381	1.34023	1.33808	1.35234
73374	74504	76977	70239	68124	71897	70489	71415		1.0304	1.06651	1.06039	1.07242	1.05743	0.00933713	1.18158	0.985079	0.973861	0.983217	1.03093	0.0502752	1.96667				1.61608	1.34732	1.33197	1.34477
73340	74333	77262	70267	68597	71759	70881	71258		1.02993	1.06406	1.06432	1.07284	1.05779	0.00950847	1.18978	0.983189	0.979276	0.981056	1.03333	0.0521588	1.98333				1.6273	1.34473	1.33938	1.34181
73347	74690	76631	69822	68556	71066	70761	71214		1.03002	1.06917	1.05563	1.06605	1.05522	0.00888278	1.18907	0.973694	0.977618	0.98045	1.03021	0.0529729	2				1.62632	1.33174	1.33711	1.34099
73472	73921	77022	69935	68242	71464	70480	71492		1.03178	1.05816	1.06101	1.06778	1.05468	0.00789572	1.18363	0.979147	0.973736	0.984277	1.0302	0.0511886	2.01667				1.61888	1.3392	1.3318	1.34622
73199	74437	76960	69165	68641	71798	70084	71388		1.02795	1.06555	1.06016	1.05602	1.05242	0.00838711	1.19055	0.983723	0.968265	0.982845	1.03135	0.0531856	2.03333				1.62834	1.34546	1.32432	1.34426
73292	73680	77031	69109	68042	71970	70441	71059		1.02925	1.05471	1.06114	1.05516	1.05007	0.0070906	1.18016	0.98608	0.973197	0.978316	1.02944	0.0503098	2.05				1.61413	1.34869	1.33107	1.33807
73278	74100	77584	69840	67978	71609	70753	71326		1.02906	1.06072	1.06875	1.06632	1.05621	0.00920771	1.17905	0.981133	0.977508	0.981992	1.02992	0.0497187	2.06667				1.61261	1.34192	1.33696	1.34309
73355	73600	77465	69525	67926	71240	70457	71209		1.03014	1.05357	1.06711	1.06152	1.05308	0.00813806	1.17815	0.976078	0.973418	0.980381	1.02701	0.0504005	2.08333				1.61138	1.33501	1.33137	1.34089
73090	74264	77451	69280	68032	71673	70328	70946		1.02642	1.06307	1.06692	1.05777	1.05355	0.00923569	1.17998	0.98201	0.971636	0.97676	1.0276	0.0508397	2.1				1.61389	1.34312	1.32893	1.33594
73279	74215	77676	69295	68218	71615	70097	71703		1.02907	1.06237	1.07002	1.058	1.05487	0.00895019	1.18321	0.981216	0.968445	0.987182	1.03001	0.051215	2.11667				1.61831	1.34203	1.32457	1.35019
73300	74953	77573	69614	68074	71247	70660	70875		1.02936	1.07293	1.0686	1.06287	1.05844	0.00990953	1.18071	0.976174	0.976223	0.975783	1.02722	0.0511634	2.13333				1.61489	1.33514	1.3352	1.3346
73053	74149	76856	69484	68268	71445	70571	71266		1.0259	1.06142	1.05872	1.06089	1.05173	0.00863239	1.18408	0.978886	0.974993	0.981166	1.02978	0.0514481	2.15				1.61949	1.33885	1.33352	1.34196
73218	73901	77996	69227	67832	71178	70231	70784		1.02821	1.05787	1.07443	1.05697	1.05437	0.00959848	1.17652	0.975228	0.970296	0.97453	1.02414	0.0508027	2.16667				1.60915	1.33384	1.3271	1.33289
73001	74488	77517	69255	67673	71406	70315	71015		1.02517	1.06628	1.06783	1.05739	1.05417	0.00993665	1.17376	0.978352	0.971457	0.97771	1.02532	0.049504	2.18333				1.60538	1.33812	1.32869	1.33724
72500	74539	77901	69278	68050	71671	70074	71259		1.01813	1.06701	1.07312	1.05774	1.054	0.0123675	1.1803	0.981983	0.968127	0.981069	1.02787	0.0509076	2.2				1.61432	1.34308	1.32413	1.34183
72698	74316	76721	69524	67887	70916	70743	70958		1.02091	1.06382	1.05686	1.0615	1.05077	0.0100584	1.17747	0.971638	0.97737	0.976925	1.02585	0.0505563	2.21667				1.61045	1.32893	1.33677	1.33617
73179	74219	77750	69489	67746	71271	70672	70765		1.02767	1.06243	1.07104	1.06097	1.05552	0.00954866	1.17502	0.976502	0.976389	0.974268	1.02555	0.0498287	2.23333				1.60711	1.33559	1.33543	1.33253
73249	74378	77792	69165	67915	71311	70067	71125		1.02865	1.0647	1.07162	1.05602	1.05525	0.00942308	1.17796	0.97705	0.96803	0.979225	1.02557	0.0508544	2.25				1.61112	1.33634	1.324	1.33931
73432	74842	77769	69300	68039	71186	69976	71178		1.03122	1.07134	1.0713	1.05808	1.05799	0.00945295	1.18011	0.975338	0.966773	0.979954	1.02554	0.0515933	2.26667				1.61406	1.33399	1.32228	1.34031
72776	74209	77329	69458	67811	71014	70476	71501		1.02201	1.06228	1.06524	1.06049	1.05251	0.0102136	1.17615	0.972981	0.973681	0.984401	1.0268	0.0498511	2.28333				1.60865	1.33077	1.33173	1.34639
73262	73927	77216	69199	67778	71173	71027	71239		1.02883	1.05825	1.06368	1.05654	1.05182	0.00781463	1.17558	0.97516	0.981293	0.980794	1.02821	0.0491438	2.3				1.60787	1.33375	1.34214	1.34146
72565	74159	76530	69049	67396	71136	70248	70743		1.01904	1.06157	1.05423	1.05425	1.04727	0.0095673	1.16895	0.974653	0.970531	0.973965	1.02203	0.0489842	2.31667				1.59881	1.33306	1.32742	1.33212
72891	73858	77517	69099	67882	71019	70634	70497		1.02362	1.05726	1.06783	1.05501	1.05093	0.00952248	1.17738	0.97305	0.975864	0.970579	1.02422	0.0510661	2.33333				1.61034	1.33086	1.33471	1.32748
73488	74049	76928	69144	67486	71162	70175	70846		1.032	1.05999	1.05972	1.0557	1.05185	0.0066886	1.17051	0.975009	0.969522	0.975383	1.02261	0.0493205	2.35				1.60094	1.33354	1.32604	1.33406
72789	73901	76875	69406	67690	70860	70519	71361		1.02219	1.05787	1.05899	1.0597	1.04969	0.0091739	1.17405	0.970871	0.974275	0.982474	1.02542	0.0496046	2.36667				1.60578	1.32788	1.33254	1.34375
73050	74256	76916	68944	67129	70821	69588	70634		1.02585	1.06296	1.05955	1.05264	1.05025	0.00841074	1.16432	0.970337	0.961413	0.972465	1.01713	0.0491211	2.38333				1.59247	1.32715	1.31495	1.33006
72795	74208	76748	69175	67507	71029	70038	70951		1.02227	1.06227	1.05724	1.05617	1.04949	0.00916859	1.17088	0.973187	0.96763	0.976829	1.02213	0.0496186	2.4				1.60144	1.33105	1.32345	1.33603
72787	73949	76750	69413	67805	71484	70173	70801		1.02216	1.05856	1.05726	1.05981	1.04945	0.00911069	1.17605	0.979421	0.969495	0.974764	1.02493	0.0504126	2.41667				1.60851	1.33958	1.326	1.33321
72788	73968	76479	69116	68307	71532	69974	71095		1.02217	1.05883	1.05353	1.05527	1.04745	0.00849803	1.18475	0.980078	0.966745	0.978812	1.0276	0.0524717	2.43333				1.62042	1.34048	1.32224	1.33874
72741	73313	76629	69297	69108	70820	70358	71086		1.02151	1.04946	1.0556	1.05803	1.04615	0.0084081	1.19865	0.970323	0.972051	0.978688	1.02993	0.0562689	2.45				1.63942	1.32714	1.3295	1.33858
73516	73104	76225	68473	67977	71099	70596	70460		1.0324	1.04647	1.05003	1.04545	1.04359	0.00385698	1.17903	0.974146	0.975339	0.970069	1.02465	0.0514738	2.46667				1.61259	1.33236	1.334	1.32679
73248	73248	76873	69406	68122	71387	69822	70591		1.02863	1.04853	1.05896	1.0597	1.04895	0.00723775	1.18155	0.978092	0.964645	0.971873	1.02404	0.052574	2.48333				1.61603	1.33776	1.31937	1.32925
73713	73368	77031	68923	67612	71491	70320	70869		1.03516	1.05024	1.06114	1.05232	1.04972	0.00539475	1.1727	0.979517	0.971526	0.9757	1.02486	0.0493067	2.5				1.60393	1.33971	1.32878	1.33449
73775	73162	76504	68499	67683	71050	70045	71153		1.03603	1.0473	1.05388	1.04585	1.04576	0.00368343	1.17393	0.973474	0.967726	0.97961	1.02369	0.0501406	2.51667				1.60561	1.33145	1.32358	1.33984
73609	73213	76410	68441	67740	71540	70331	71133		1.0337	1.04803	1.05258	1.04496	1.04482	0.00402186	1.17492	0.980188	0.971678	0.979335	1.02653	0.0495002	2.53333				1.60697	1.34063	1.32899	1.33946
73764	73640	76808	68933	68134	71111	70510	71119		1.03588	1.05414	1.05806	1.05248	1.05014	0.00489529	1.18175	0.97431	0.974151	0.979142	1.02734	0.0514845	2.55				1.61631	1.33259	1.33237	1.3392
73629	72884	76503	68964	67542	71199	70186	71304		1.03398	1.04332	1.05386	1.05295	1.04603	0.00466977	1.17149	0.975516	0.969674	0.981689	1.02459	0.0490262	2.56667				1.60227	1.33424	1.32625	1.34268
73611	73139	76703	68753	67846	71555	70390	71077		1.03373	1.04697	1.05662	1.04973	1.04676	0.00479367	1.17676	0.980394	0.972493	0.978564	1.02705	0.0499306	2.58333				1.60948	1.34091	1.3301	1.33841
73860	73539	76832	68752	67591	71135	69485	70667		1.03723	1.05269	1.05839	1.04971	1.04951	0.00447152	1.17234	0.974639	0.95999	0.972919	1.01997	0.0508933	2.6				1.60343	1.33304	1.313	1.33069
73605	72524	76376	68869	68029	71411	70182	71030		1.03365	1.03816	1.05211	1.0515	1.04386	0.00468342	1.17993	0.978421	0.969619	0.977917	1.02647	0.0511932	2.61667				1.61382	1.33821	1.32617	1.33752
74225	73499	76309	68757	67881	71228	70143	71065		1.04235	1.05212	1.05119	1.04979	1.04886	0.00222192	1.17737	0.975913	0.96908	0.978399	1.02519	0.0507636	2.63333				1.61031	1.33478	1.32544	1.33818
73703	73106	76573	68774	67910	71093	69813	71567		1.03502	1.04649	1.05483	1.05005	1.0466	0.00421889	1.17787	0.974064	0.964521	0.98531	1.02544	0.0509865	2.65				1.611	1.33225	1.3192	1.34763
73596	72700	75807	68871	67799	71098	69678	71399		1.03352	1.04068	1.04427	1.05153	1.0425	0.00374846	1.17594	0.974132	0.962656	0.982997	1.02393	0.0508411	2.66667				1.60837	1.33234	1.31665	1.34447
73250	72731	76196	68742	67592	71152	69809	71531		1.02866	1.04113	1.04963	1.04956	1.04225	0.00494841	1.17235	0.974872	0.964466	0.984814	1.02413	0.0495832	2.68333				1.60346	1.33336	1.31912	1.34695
73289	72743	76275	69376	67804	71100	69850	70765		1.02921	1.0413	1.05072	1.05924	1.04512	0.00644526	1.17603	0.974159	0.965032	0.974268	1.02237	0.0512648	2.7				1.60849	1.33238	1.3199	1.33253
73007	72787	76572	69506	67558	70958	70267	71283		1.02525	1.04193	1.05481	1.06123	1.0458	0.00793972	1.17176	0.972214	0.970793	0.9814	1.02404	0.0492962	2.71667				1.60265	1.32972	1.32778	1.34229
73146	73106	75997	69349	67187	70880	69398	71185		1.0272	1.04649	1.04689	1.05883	1.04485	0.00654295	1.16533	0.971145	0.958788	0.980051	1.01883	0.0490276	2.73333				1.59385	1.32826	1.31136	1.34044
72768	72150	76005	69051	67691	71346	69924	70788		1.02189	1.03281	1.047	1.05428	1.039	0.00723655	1.17407	0.97753	0.966055	0.974585	1.02306	0.0503955	2.75				1.6058	1.33699	1.3213	1.33296
72378	72641	76225	69090	67348	71199	70093	70819		1.01642	1.03984	1.05003	1.05487	1.04029	0.00855251	1.16812	0.975516	0.968389	0.975012	1.02176	0.0488141	2.76667				1.59767	1.33424	1.32449	1.33355
72999	72438	76163	68702	67379	70980	69792	70258		1.02514	1.03693	1.04918	1.04895	1.04005	0.00573468	1.16866	0.972515	0.964231	0.967288	1.01817	0.0501909	2.78333				1.5984	1.33013	1.3188	1.32298
72686	72420	75816	68600	66975	71097	69726	70671		1.02074	1.03667	1.0444	1.04739	1.0373	0.00596381	1.16165	0.974118	0.963319	0.972974	1.01802	0.0479397	2.8				1.58882	1.33233	1.31756	1.33076
72925	72472	76126	68983	66929	70880	70109	70646		1.0241	1.03742	1.04867	1.05324	1.04086	0.00650026	1.16085	0.971145	0.968611	0.97263	1.01831	0.0475218	2.81667				1.58773	1.32826	1.32479	1.33029
73053	72585	76496	68855	67765	70845	70261	70448		1.0259	1.03904	1.05377	1.05129	1.0425	0.00640183	1.17535	0.970666	0.970711	0.969904	1.02166	0.051232	2.83333				1.60756	1.3276	1.32766	1.32656
72969	72337	75906	68663	66938	70762	70012	70017		1.02472	1.03549	1.04564	1.04835	1.03855	0.0053784	1.16101	0.969528	0.96727	0.96397	1.01544	0.048535	2.85				1.58794	1.32605	1.32296	1.31845
72834	72569	76274	68572	67265	71214	69555	70851		1.02282	1.03881	1.05071	1.04696	1.03982	0.00618871	1.16668	0.975721	0.960957	0.975452	1.0197	0.049114	2.86667				1.5957	1.33452	1.31432	1.33415
72679	72565	75749	68235	67009	70675	70210	70136		1.02064	1.03875	1.04348	1.04182	1.03617	0.00526792	1.16224	0.968336	0.970006	0.965608	1.01655	0.0485728	2.88333				1.58963	1.32442	1.3267	1.32069
72798	71924	75559	68208	67551	70919	70239	70829		1.02231	1.02957	1.04086	1.04141	1.03354	0.00462944	1.17164	0.97168	0.970407	0.975149	1.02222	0.0498175	2.9				1.60248	1.32899	1.32725	1.33374
72322	72332	75154	68314	67102	71067	70132	70441		1.01563	1.03541	1.03528	1.04303	1.03234	0.00585586	1.16385	0.973707	0.968928	0.969808	1.01907	0.0482711	2.91667				1.59183	1.33176	1.32523	1.32643
72596	72439	75302	68157	67460	71096	69981	70577		1.01948	1.03695	1.03732	1.04063	1.03359	0.00477714	1.17006	0.974105	0.966842	0.97168	1.02067	0.0498198	2.93333				1.60032	1.33231	1.32237	1.32899
72830	72910	75865	67475	67665	70686	69820	70550		1.02276	1.04369	1.04507	1.03022	1.03544	0.00539146	1.17362	0.968487	0.964618	0.971308	1.01951	0.0513886	2.95				1.60519	1.32462	1.31933	1.32848
72077	72207	75907	68193	67698	71097	70311	70654		1.01219	1.03363	1.04565	1.04118	1.03316	0.00741796	1.17419	0.974118	0.971401	0.97274	1.02311	0.0503626	2.96667				1.60597	1.33233	1.32861	1.33044
72753	72234	76017	67732	67191	70967	70448	70393		1.02168	1.03401	1.04717	1.03414	1.03425	0.00520303	1.1654	0.972337	0.973294	0.969147	1.02004	0.0484594	2.98333				1.59394	1.32989	1.3312	1.32553
72447	71971	75585	68004	67538	70520	69651	70143		1.01739	1.03025	1.04122	1.03829	1.03179	0.00533076	1.17142	0.966213	0.962283	0.965705	1.0164	0.051678	3				1.60218	1.32151	1.31614	1.32082
72670	71983	75489	67911	67671	71309	69510	70048		1.02052	1.03042	1.03989	1.03687	1.03193	0.0042855	1.17372	0.977023	0.960335	0.964397	1.01887	0.05174	3.01667				1.60533	1.3363	1.31347	1.31903
73001	72052	75561	67340	67143	70818	69984	70349		1.02517	1.03141	1.04089	1.02815	1.0314	0.00340807	1.16457	0.970296	0.966884	0.968541	1.01757	0.0490029	3.03333				1.5928	1.3271	1.32243	1.3247
72364	72088	75885	67433	67767	70941	69706	70330		1.01622	1.03192	1.04535	1.02957	1.03077	0.00596519	1.17539	0.971981	0.963043	0.968279	1.01967	0.0519375	3.05				1.60761	1.3294	1.31718	1.32434
72061	71792	75670	67422	67061	70510	69608	70325		1.01196	1.02768	1.04239	1.02941	1.02786	0.0062324	1.16314	0.966076	0.961689	0.96821	1.01478	0.0494731	3.06667				1.59086	1.32133	1.31533	1.32425
72161	71358	75313	67749	67697	70620	69747	70216		1.01337	1.02147	1.03747	1.0344	1.02668	0.00562948	1.17417	0.967583	0.963609	0.96671	1.01802	0.0520587	3.08333				1.60595	1.32339	1.31795	1.32219
71874	71783	75056	67568	67621	70791	69680	70122		1.00934	1.02756	1.03393	1.03164	1.02561	0.0055831	1.17286	0.969926	0.962684	0.965416	1.01772	0.0517334	3.1				1.60414	1.32659	1.31669	1.32042
72098	71683	75277	67511	68135	70966	69645	70112		1.01248	1.02612	1.03697	1.03077	1.02659	0.0051996	1.18177	0.972323	0.9622	0.965278	1.02039	0.0538343	3.11667				1.61634	1.32987	1.31602	1.32023
73038	70966	75344	67597	67437	70799	69363	70477		1.02568	1.01586	1.0379	1.03208	1.02788	0.00471903	1.16966	0.970035	0.958304	0.970303	1.01708	0.0509394	3.13333				1.59978	1.32674	1.3107	1.32711
73632	71569	75576	67662	67446	70869	69971	70239		1.03403	1.02449	1.04109	1.03307	1.03317	0.003401	1.16982	0.970994	0.966704	0.967026	1.01864	0.0504042	3.15				1.59999	1.32805	1.32219	1.32263
75083	71583	75086	67750	68079	70906	69685	70183		1.0544	1.02469	1.03434	1.03441	1.03696	0.00624554	1.1808	0.971501	0.962753	0.966255	1.02033	0.053521	3.16667				1.61501	1.32875	1.31678	1.32157
74394	71558	75438	67231	67955	70756	69355	70393		1.04473	1.02434	1.03919	1.02649	1.03369	0.00492815	1.17865	0.969446	0.958193	0.969147	1.01886	0.0533276	3.18333				1.61207	1.32594	1.31055	1.32553
74585	71349	74758	67614	67712	70521	69632	70478		1.04741	1.02134	1.02982	1.03234	1.03273	0.00542948	1.17443	0.966226	0.96202	0.970317	1.01825	0.0520891	3.2				1.6063	1.32153	1.31578	1.32713
74123	71454	75023	67556	67652	70306	69518	70298		1.04092	1.02285	1.03347	1.03145	1.03217	0.00371641	1.17339	0.963281	0.960445	0.967839	1.01624	0.0524068	3.21667				1.60488	1.3175	1.31363	1.32374
73555	71337	75402	66954	67636	70336	69609	70192		1.03295	1.02117	1.0387	1.02226	1.02877	0.00424311	1.17312	0.963692	0.961703	0.966379	1.01622	0.0523066	3.23333				1.6045	1.31807	1.31534	1.32174
73779	71150	74949	67779	67598	71196	69942	70365		1.03609	1.01849	1.03245	1.03486	1.03047	0.00406397	1.17246	0.975475	0.966303	0.968761	1.02075	0.0506064	3.25				1.6036	1.33418	1.32164	1.325
72809	71127	74793	67323	67553	71044	69217	70007		1.02247	1.01817	1.03031	1.02789	1.02471	0.00272811	1.17168	0.973392	0.956287	0.963832	1.0163	0.0519112	3.26667				1.60253	1.33133	1.30794	1.31826
73366	70872	74975	67814	67586	70807	69968	70415		1.03029	1.01452	1.03281	1.03539	1.02825	0.00469605	1.17225	0.970145	0.966663	0.96945	1.01963	0.0508797	3.28333				1.60331	1.32689	1.32213	1.32594
72763	71252	74657	66812	67455	70697	69605	70041		1.02182	1.01995	1.02843	1.02009	1.02258	0.00199797	1.16998	0.968638	0.961647	0.9643	1.01614	0.0512989	3.3				1.60021	1.32483	1.31527	1.3189
72595	71038	75216	67392	68061	70177	69153	70299		1.01946	1.01689	1.03613	1.02895	1.02536	0.00442921	1.18049	0.961513	0.955403	0.967853	1.01631	0.0547835	3.31667				1.61458	1.31509	1.30673	1.32376
72840	70954	75250	67050	67715	70450	70018	70548		1.0229	1.01569	1.0366	1.02373	1.02473	0.00434941	1.17449	0.965254	0.967353	0.971281	1.01959	0.051646	3.33333				1.60637	1.3202	1.32307	1.32844
72866	70838	75066	66518	67885	70363	69596	70100		1.02327	1.01403	1.03407	1.0156	1.02174	0.00457715	1.17743	0.964062	0.961523	0.965113	1.01703	0.0534725	3.35				1.61041	1.31857	1.3151	1.32001
72237	70908	74894	66536	67311	71140	69464	70340		1.01444	1.01503	1.0317	1.01588	1.01926	0.00415606	1.16748	0.974707	0.959699	0.968417	1.01758	0.0500624	3.36667				1.59679	1.33313	1.3126	1.32453
72345	70698	75246	66726	67408	70810	69911	70398		1.01595	1.01202	1.03655	1.01878	1.02083	0.00542007	1.16916	0.970186	0.965875	0.969216	1.01861	0.0501925	3.38333				1.59909	1.32695	1.32105	1.32562
72906	70924	74244	66835	67682	70665	69891	70749		1.02383	1.01526	1.02274	1.02044	1.02057	0.0019056	1.17391	0.968199	0.965599	0.974048	1.02044	0.0511884	3.4				1.60559	1.32423	1.32067	1.33223
72610	70054	74604	66952	67709	70884	69430	70090		1.01967	1.00281	1.0277	1.02223	1.0181	0.00536703	1.17438	0.9712	0.95923	0.964975	1.01745	0.0523689	3.41667				1.60623	1.32833	1.31196	1.31982
72496	70608	74704	66393	67367	70692	69185	70459		1.01807	1.01074	1.02908	1.0137	1.0179	0.004021	1.16845	0.968569	0.955845	0.970055	1.01573	0.0510066	3.43333				1.59812	1.32474	1.30733	1.32677
72325	70514	74549	66351	67552	70406	69339	70869		1.01567	1.00939	1.02694	1.01305	1.01627	0.00378568	1.17166	0.964651	0.957972	0.9757	1.0175	0.0515176	3.45				1.60251	1.31938	1.31024	1.33449
71711	70730	74666	66737	67569	70523	68925	70254		1.00705	1.01248	1.02856	1.01895	1.01676	0.00462359	1.17195	0.966254	0.952253	0.967233	1.01442	0.0526215	3.46667				1.60291	1.32157	1.30242	1.32291
71550	70522	74306	66556	67307	70416	69687	70031		1.00479	1.0095	1.0236	1.01618	1.01352	0.00409273	1.16741	0.964788	0.96278	0.964163	1.01479	0.0508766	3.48333				1.5967	1.31956	1.31682	1.31871
71749	70575	74108	66771	67923	70937	69556	70615		1.00758	1.01026	1.02087	1.01947	1.01455	0.00330432	1.17809	0.971926	0.96097	0.972203	1.0208	0.052497	3.5				1.61131	1.32933	1.31434	1.32971
71606	70268	74090	65730	67290	70412	69158	70744		1.00558	1.00587	1.02062	1.00357	1.00891	0.00393724	1.16711	0.964733	0.955472	0.973979	1.01532	0.0507375	3.51667				1.59629	1.31949	1.30682	1.33214
71853	71370	74075	65781	67698	70504	69693	70599		1.00904	1.02164	1.02042	1.00435	1.01386	0.0042541	1.17419	0.965993	0.962863	0.971983	1.01876	0.0518457	3.53333				1.60597	1.32121	1.31693	1.32941
71939	70422	73448	66437	67842	70589	69529	70188		1.01025	1.00807	1.01178	1.01437	1.01112	0.00132329	1.17669	0.967158	0.960597	0.966324	1.01769	0.053019	3.55				1.60939	1.32281	1.31383	1.32167
71171	70027	73940	66197	67531	71059	69555	70139		0.999466	1.00242	1.01856	1.0107	1.00779	0.0043061	1.17129	0.973598	0.960957	0.96565	1.01787	0.0512065	3.56667				1.60201	1.33161	1.31432	1.32074
71118	69954	73807	66389	67474	70639	69588	70692		0.998722	1.00137	1.01672	1.01363	1.00761	0.00444623	1.17031	0.967843	0.961413	0.973263	1.01821	0.0507578	3.58333				1.60066	1.32374	1.31495	1.33116
70894	70155	73837	66127	67535	70084	69636	70325		0.995576	1.00425	1.01714	1.00963	1.00665	0.0045392	1.17136	0.960239	0.962076	0.96821	1.01547	0.0519919	3.6				1.6021	1.31334	1.31585	1.32425
71447	70218	73740	65875	67364	70542	69824	70990		1.00334	1.00515	1.0158	1.00579	1.00752	0.00280809	1.1684	0.966514	0.964673	0.977366	1.01924	0.0497989	3.61667				1.59805	1.32193	1.31941	1.33677
71475	70126	73881	66086	68287	70434	69567	70569		1.00374	1.00384	1.01774	1.00901	1.00858	0.00329281	1.18441	0.965034	0.961122	0.97157	1.02053	0.0546671	3.63333				1.61994	1.3199	1.31455	1.32884
71490	70360	74408	66055	68008	70506	69911	69973		1.00395	1.00719	1.025	1.00853	1.01117	0.00471112	1.17957	0.966021	0.965875	0.963364	1.01871	0.0536238	3.65				1.61332	1.32125	1.32105	1.31762
71164	70106	73432	66001	67469	70892	69468	70100		0.999368	1.00355	1.01156	1.00771	1.00555	0.00262955	1.17022	0.97131	0.959755	0.965113	1.0166	0.0512612	3.66667				1.60054	1.32848	1.31268	1.32001
71345	70138	73560	65727	68206	70577	69754	70665		1.00191	1.00401	1.01332	1.00353	1.00569	0.00258242	1.183	0.966994	0.963706	0.972891	1.02165	0.0538182	3.68333				1.61802	1.32258	1.31808	1.33065
71768	70054	73631	66125	68287	70370	70466	70623		1.00785	1.00281	1.0143	1.0096	1.00864	0.00237372	1.18441	0.964158	0.973543	0.972313	1.02361	0.0536411	3.7				1.61994	1.3187	1.33154	1.32986
71097	69971	73838	66119	67714	70312	69857	70872		0.998427	1.00162	1.01715	1.00951	1.00668	0.0041971	1.17447	0.963363	0.965129	0.975741	1.01968	0.0516701	3.71667				1.60635	1.31762	1.32003	1.33455
71869	69931	73831	65874	68740	70440	70159	70644		1.00927	1.00104	1.01705	1.00577	1.00828	0.0033739	1.19226	0.965117	0.969301	0.972602	1.02482	0.0558354	3.73333				1.63069	1.32001	1.32574	1.33025
71311	71298	73621	65868	68458	70383	69941	70706		1.00143	1.02061	1.01416	1.00568	1.01047	0.00429277	1.18737	0.964336	0.966289	0.973456	1.02286	0.0548716	3.75				1.624	1.31895	1.32162	1.33142
71451	70800	73429	66266	68324	70826	69956	70821		1.0034	1.01348	1.01152	1.01176	1.01004	0.00225648	1.18505	0.970405	0.966497	0.975039	1.02425	0.0536289	3.76667				1.62082	1.32725	1.3219	1.33359
71970	70544	73739	66088	68264	70550	69696	70331		1.01069	1.00982	1.01579	1.00904	1.01133	0.00152221	1.18401	0.966624	0.962905	0.968293	1.02046	0.0545286	3.78333				1.6194	1.32208	1.31699	1.32436
71521	69571	73512	65697	68398	70357	69814	70640		1.00438	0.995892	1.01266	1.00307	1.004	0.00343689	1.18633	0.963979	0.964535	0.972547	1.02185	0.0548629	3.8				1.62258	1.31846	1.31922	1.33018
71165	70436	73039	65910	67990	70741	70274	70969		0.999382	1.00827	1.00614	1.00632	1.00503	0.00194356	1.17926	0.969241	0.97089	0.977077	1.02412	0.0517408	3.81667				1.6129	1.32565	1.32791	1.33637
70879	69675	73482	66151	67963	69984	70339	70116		0.995366	0.99738	1.01225	1.01	1.00375	0.00430238	1.17879	0.958869	0.971788	0.965333	1.01869	0.0534295	3.83333				1.61226	1.31147	1.32914	1.32031
71619	70156	73335	65314	67629	70777	69759	70330		1.00576	1.00427	1.01022	0.997221	1.00437	0.00269692	1.17299	0.969734	0.963775	0.968279	1.0187	0.0514486	3.85				1.60433	1.32633	1.31818	1.32434
71278	70278	73510	65673	68007	70653	70240	70903		1.00097	1.00601	1.01263	1.0027	1.00558	0.00257326	1.17955	0.968035	0.97042	0.976168	1.02354	0.0520304	3.86667				1.6133	1.32401	1.32727	1.33513
71006	69892	73101	65880	67742	70297	69963	70244		0.997149	1.00049	1.007	1.00586	1.00262	0.00231234	1.17495	0.963157	0.966593	0.967095	1.01795	0.0523421	3.88333				1.60701	1.31733	1.32203	1.32272
71067	70036	73410	65477	67288	70141	69895	70268		0.998006	1.00255	1.01125	0.99971	1.00288	0.00294462	1.16708	0.96102	0.965654	0.967426	1.01529	0.0506131	3.9				1.59624	1.31441	1.32075	1.32317
70766	69823	73243	65445	67467	70564	69674	70432		0.993779	0.999499	1.00895	0.999221	1.00036	0.0031518	1.17018	0.966816	0.962601	0.969684	1.01732	0.0509753	3.91667				1.60049	1.32234	1.31657	1.32626
70607	69775	73534	65652	67332	70283	69949	70017		0.991546	0.998812	1.01296	1.00238	1.00143	0.00445773	1.16784	0.962966	0.9664	0.96397	1.01529	0.0508546	3.93333				1.59729	1.31707	1.32177	1.31845
70611	69796	73382	65356	67433	70080	69414	70153		0.991602	0.999112	1.01087	0.997862	0.999861	0.0040201	1.1696	0.960184	0.959009	0.965842	1.01366	0.0520006	3.95				1.59968	1.31327	1.31166	1.32101
70523	69803	73276	65614	67434	70409	69725	70021		0.990366	0.999213	1.00941	1.0018	1.0002	0.00392682	1.16961	0.964692	0.963305	0.964025	1.01541	0.051402	3.96667				1.59971	1.31943	1.31754	1.31852
70608	69889	73375	65059	66979	70228	69357	70823		0.99156	1.00044	1.01077	0.993328	0.999026	0.00436078	1.16172	0.962212	0.958221	0.975067	1.01431	0.0492697	3.98333				1.58891	1.31604	1.31058	1.33362
71006	69614	73121	65504	66763	70044	69550	70139		0.997149	0.996507	1.00727	1.00012	1.00026	0.00246589	1.15797	0.959691	0.960888	0.96565	1.01105	0.0489914	4				1.58379	1.31259	1.31423	1.32074
70496	69610	73181	65210	67721	70242	69462	70331		0.989987	0.99645	1.0081	0.995633	0.997543	0.0038011	1.17459	0.962404	0.959672	0.968293	1.01624	0.0528142	4.01667				1.60652	1.3163	1.31257	1.32436
70356	69447	72874	65453	66837	70144	69736	69802		0.988021	0.994117	1.00387	0.999343	0.996338	0.0034142	1.15926	0.961061	0.963457	0.96101	1.0112	0.049357	4.03333				1.58555	1.31447	1.31774	1.3144
70855	69273	72639	65448	67294	70165	69312	70153		0.995029	0.991626	1.00063	0.999267	0.996639	0.00205323	1.16718	0.961349	0.957599	0.965842	1.01299	0.0514244	4.05				1.59639	1.31486	1.30973	1.32101
70892	69478	72352	65587	66882	70509	69498	69841		0.995548	0.99456	0.99668	1.00139	0.997045	0.00151163	1.16004	0.966062	0.960169	0.961547	1.01195	0.0493774	4.06667				1.58661	1.32131	1.31325	1.31513
69619	69510	73320	65549	67175	70169	69574	69802		0.977671	0.995018	1.01001	1.00081	0.995878	0.00680921	1.16512	0.961404	0.961219	0.96101	1.01219	0.0509774	4.08333				1.59356	1.31494	1.31468	1.3144
69943	69564	72903	65298	67353	70695	69415	70071		0.982221	0.995791	1.00427	0.996977	0.994815	0.00459739	1.16821	0.96861	0.959022	0.964713	1.01514	0.051061	4.1				1.59779	1.32479	1.31168	1.31946
70840	69463	72960	65146	66874	70057	69391	70182		0.994818	0.994346	1.00506	0.994656	0.997219	0.00261407	1.1599	0.959869	0.958691	0.966242	1.01118	0.0496025	4.11667				1.58642	1.31284	1.31123	1.32155
70217	69692	73387	65639	67457	70394	69376	70138		0.986069	0.997624	1.01094	1.00218	0.999203	0.00517668	1.17001	0.964486	0.958484	0.965636	1.01465	0.0518094	4.13333				1.60025	1.31915	1.31094	1.32072
70506	69077	73120	65731	66862	69786	69594	69734		0.990128	0.98882	1.00726	1.00359	0.997449	0.00467257	1.15969	0.956156	0.961495	0.960074	1.00935	0.0501251	4.15				1.58614	1.30776	1.31506	1.31312
70606	69436	72677	65850	67159	70796	69682	69694		0.991532	0.993959	1.00116	1.0054	0.998013	0.00320108	1.16484	0.969994	0.962711	0.959523	1.01427	0.0502394	4.16667				1.59318	1.32669	1.31672	1.31236
70435	69320	72967	65345	66655	70111	69110	69755		0.989131	0.992299	1.00515	0.997695	0.996069	0.00350595	1.1561	0.960609	0.954809	0.960363	1.00797	0.049395	4.18333				1.58123	1.31385	1.30592	1.31351
70876	69460	73367	65492	67225	70212	69119	69839		0.995324	0.994303	1.01066	0.999939	1.00006	0.00374166	1.16599	0.961993	0.954933	0.961519	1.01111	0.0516515	4.2				1.59475	1.31574	1.30609	1.31509
69985	69712	72450	64526	66872	69850	69888	70155		0.982811	0.99791	0.99803	0.98519	0.990985	0.00406186	1.15986	0.957033	0.965557	0.96587	1.01208	0.0493037	4.21667				1.58638	1.30896	1.32062	1.32104
70299	69547	72891	65082	66664	70190	69166	70213		0.987221	0.995548	1.00411	0.993679	0.995138	0.00348077	1.15626	0.961691	0.955582	0.966669	1.01005	0.0487884	4.23333				1.58144	1.31533	1.30697	1.32214
70635	69144	72723	65782	66524	70231	68987	69950		0.991939	0.989779	1.00179	1.00437	0.996969	0.00359359	1.15383	0.962253	0.953109	0.963048	1.00806	0.048642	4.25				1.57812	1.3161	1.30359	1.31718
69758	69502	72496	64875	67025	70050	68741	69890		0.979623	0.994904	0.998664	0.990519	0.990927	0.00411919	1.16252	0.959773	0.949711	0.962222	1.00856	0.0513922	4.26667				1.59001	1.31271	1.29894	1.31605
70224	69801	72896	65890	66456	70001	69387	70056		0.986167	0.999184	1.00417	1.00602	0.998885	0.00447813	1.15265	0.959102	0.958636	0.964507	1.00872	0.0479938	4.28333				1.57651	1.31179	1.31115	1.31918
70257	68639	72505	65128	67204	70607	69059	70115		0.986631	0.98255	0.998788	0.994381	0.990588	0.00367297	1.16562	0.967405	0.954104	0.965319	1.01311	0.0509206	4.3				1.59425	1.32314	1.30495	1.32029
70186	68568	73266	65238	67068	70254	68741	69798		0.985634	0.981534	1.00927	0.996061	0.993125	0.00618989	1.16326	0.962568	0.949711	0.960955	1.00912	0.0514594	4.31667				1.59103	1.31653	1.29894	1.31432
70236	69017	72854	65557	65905	70035	69128	69575		0.986336	0.987961	1.0036	1.00093	0.994706	0.0044095	1.14309	0.959568	0.955057	0.957885	1.0039	0.0464067	4.33333				1.56344	1.31242	1.30626	1.31012
70223	68724	72733	65511	66854	70385	68858	69614		0.986153	0.983767	1.00193	1.00023	0.99302	0.00469129	1.15955	0.964363	0.951327	0.958422	1.00842	0.0504492	4.35				1.58595	1.31898	1.30115	1.31086
70135	68637	72578	65313	66618	69982	68781	69980		0.984918	0.982522	0.999793	0.997206	0.99111	0.00432691	1.15546	0.958841	0.950263	0.963461	1.00701	0.0495598	4.36667				1.58035	1.31143	1.2997	1.31775
71825	68783	72470	65463	66647	69793	69039	69728		1.00865	0.984612	0.998306	0.999496	0.997766	0.00495644	1.15596	0.956252	0.953828	0.959991	1.00651	0.0498341	4.38333				1.58104	1.30789	1.30457	1.313
72582	69098	73039	65310	66974	69823	68445	69563		1.01928	0.989121	1.00614	0.99716	1.00293	0.0064658	1.16163	0.956663	0.945621	0.95772	1.00541	0.0521466	4.4				1.5888	1.30845	1.29335	1.3099
72310	69095	72663	65487	66555	70639	68472	69560		1.01546	0.989078	1.00096	0.999863	1.00134	0.00541681	1.15437	0.967843	0.945994	0.957678	1.00647	0.0495003	4.41667				1.57886	1.32374	1.29386	1.30984
71160	68977	72706	64740	66423	70628	68640	69871		0.999312	0.987389	1.00156	0.988457	0.994179	0.00364716	1.15208	0.967692	0.948315	0.96196	1.00751	0.0483597	4.43333				1.57572	1.32354	1.29703	1.3157
71476	68587	73088	65160	66878	70616	68809	69953		1.00375	0.981806	1.00682	0.99487	0.996811	0.00560669	1.15997	0.967528	0.95065	0.963089	1.01031	0.0500143	4.45				1.58652	1.32331	1.30023	1.31724
70374	69113	72573	65100	67016	70573	69261	69580		0.988274	0.989336	0.999724	0.993954	0.992822	0.00261033	1.16236	0.966939	0.956895	0.957954	1.01104	0.0504919	4.46667				1.58979	1.32251	1.30877	1.31022
70300	69102	72301	64470	66158	70588	68982	69958		0.987235	0.989178	0.995978	0.984335	0.989181	0.0024743	1.14748	0.967144	0.95304	0.963158	1.00771	0.0466861	4.48333				1.56944	1.32279	1.3035	1.31733
70261	69287	72490	65111	66719	70597	69108	70423		0.986687	0.991826	0.998581	0.994122	0.992804	0.00247461	1.15721	0.967268	0.954781	0.96956	1.0122	0.0484443	4.5				1.58275	1.32296	1.30588	1.32609
70602	69293	72498	65385	66763	70671	69065	69952		0.991476	0.991912	0.998691	0.998305	0.995096	0.00196783	1.15797	0.968282	0.954187	0.963075	1.01088	0.0491178	4.51667				1.58379	1.32434	1.30507	1.31722
70823	69135	72990	65472	66041	70244	69546	70275		0.994579	0.98965	1.00547	0.999634	0.997333	0.00339226	1.14545	0.962431	0.960832	0.967522	1.00906	0.0454864	4.53333				1.56666	1.31634	1.31415	1.3233
70056	69022	72482	65224	66702	70602	68628	70057		0.983808	0.988033	0.998471	0.995847	0.99154	0.00339937	1.15692	0.967336	0.948149	0.964521	1.00923	0.0494099	4.55				1.58234	1.32305	1.29681	1.3192
70423	69338	72465	65222	66535	70065	69324	70268		0.988962	0.992556	0.998237	0.995817	0.993893	0.00201389	1.15402	0.959979	0.957765	0.967426	1.0098	0.0481185	4.56667				1.57838	1.31299	1.30996	1.32317
69769	68759	72698	65199	66636	70623	69367	70132		0.979778	0.984268	1.00145	0.995465	0.990239	0.00498338	1.15577	0.967624	0.958359	0.965553	1.01183	0.0480225	4.58333				1.58078	1.32344	1.31077	1.32061
70047	68674	72721	64818	66951	70244	69414	70139		0.983682	0.983051	1.00176	0.989648	0.989536	0.00433821	1.16123	0.962431	0.959009	0.96565	1.01208	0.0497364	4.6				1.58825	1.31634	1.31166	1.32074
70383	69549	72587	64882	67092	69503	69495	69690		0.9884	0.995577	0.999917	0.990625	0.99363	0.0025771	1.16368	0.952279	0.960128	0.959468	1.00889	0.0516279	4.61667				1.59159	1.30246	1.31319	1.31229
70510	69462	72584	64881	66792	70160	69080	70064		0.990184	0.994331	0.999876	0.99061	0.99375	0.0022443	1.15848	0.96128	0.954394	0.964617	1.00969	0.0496406	4.63333				1.58448	1.31477	1.30535	1.31933
70236	69521	72453	64931	66599	70333	69636	69442		0.986336	0.995176	0.998071	0.991374	0.992739	0.002537	1.15513	0.963651	0.962076	0.956054	1.00923	0.0486616	4.65				1.5799	1.31801	1.31585	1.30762
70394	69127	72587	64544	66753	70503	69141	69757		0.988555	0.989536	0.999917	0.985465	0.990868	0.00313862	1.1578	0.96598	0.955237	0.96039	1.00985	0.049365	4.66667				1.58355	1.32119	1.3065	1.31355
70110	69390	72359	64958	66102	70050	69119	69786		0.984567	0.993301	0.996777	0.991786	0.991607	0.00256893	1.14651	0.959773	0.954933	0.96079	1.0055	0.0470201	4.68333				1.56811	1.31271	1.30609	1.3141
70242	68830	72538	64638	66386	70037	69052	69687		0.98642	0.985284	0.999242	0.9869	0.989462	0.00327775	1.15144	0.959595	0.954007	0.959427	1.00612	0.0484571	4.7				1.57485	1.31246	1.30482	1.31223
70143	68878	72258	64626	66571	69424	68952	69688		0.98503	0.985972	0.995385	0.986717	0.988276	0.00239478	1.15464	0.951196	0.952626	0.95944	1.00448	0.0500881	4.71667				1.57924	1.30097	1.30293	1.31225
70354	69046	72312	64701	66308	70557	69275	70213		0.987993	0.988376	0.996129	0.987862	0.99009	0.00201595	1.15008	0.96672	0.957088	0.966669	1.01014	0.0467025	4.73333				1.573	1.32221	1.30903	1.32214
70362	68807	72490	65327	67099	69531	69038	69468		0.988105	0.984955	0.998581	0.99742	0.992265	0.00338132	1.1638	0.952662	0.953814	0.956412	1.00667	0.0523824	4.75				1.59176	1.30298	1.30455	1.30811
69792	68799	72349	65457	66475	70473	69250	69636		0.980101	0.984841	0.996639	0.999405	0.990246	0.00462681	1.15298	0.965569	0.956743	0.958725	1.0085	0.0481955	4.76667				1.57696	1.32063	1.30856	1.31127
69838	68723	72327	65009	66618	69887	68893	69626		0.980747	0.983753	0.996336	0.992564	0.98835	0.00365692	1.15546	0.95754	0.951811	0.958587	1.00585	0.0498923	4.78333				1.58035	1.30965	1.30181	1.31108
69674	68728	72404	64749	66213	70116	68253	70015		0.978444	0.983824	0.997396	0.988595	0.987065	0.00401981	1.14843	0.960677	0.942968	0.963943	1.00401	0.0483629	4.8				1.57074	1.31394	1.28972	1.31841
69753	68700	72628	64940	67208	69940	69643	69476		0.979553	0.983424	1.00048	0.991511	0.988742	0.00463878	1.16569	0.958266	0.962172	0.956522	1.01066	0.0516899	4.81667				1.59435	1.31064	1.31599	1.30826
70350	68857	72882	64570	66838	70159	68930	69377		0.987937	0.985671	1.00398	0.985862	0.990863	0.00440281	1.15927	0.961267	0.952322	0.955159	1.00701	0.0507908	4.83333				1.58557	1.31475	1.30251	1.30639
69851	68609	72747	65142	66957	69494	68859	69480		0.980929	0.982121	1.00212	0.994595	0.989942	0.00510218	1.16134	0.952155	0.951341	0.956577	1.00535	0.0520081	4.85				1.58839	1.30229	1.30117	1.30833
69859	68652	71794	64627	66326	70204	68938	69678		0.981042	0.982736	0.988993	0.986732	0.984876	0.00181837	1.15039	0.961883	0.952432	0.959303	1.006	0.0481718	4.86667				1.57342	1.31559	1.30267	1.31206
69804	68190	72399	64672	66841	70128	69263	69558		0.980269	0.976123	0.997328	0.987419	0.985285	0.00464289	1.15933	0.960842	0.956922	0.957651	1.00869	0.0502211	4.88333				1.58564	1.31417	1.30881	1.3098
69865	69047	72244	64637	67144	69365	69611	70015		0.981126	0.988391	0.995192	0.986885	0.987898	0.00289162	1.16458	0.950388	0.96173	0.963943	1.01016	0.0515594	4.9				1.59283	1.29987	1.31538	1.31841
69109	68366	72071	64773	67003	70140	69430	69400		0.970509	0.978642	0.992809	0.988961	0.982731	0.00505364	1.16214	0.961006	0.95923	0.955475	1.00946	0.0509047	4.91667				1.58948	1.31439	1.31196	1.30683
69785	68296	71915	64471	66712	69612	69275	69357		0.980003	0.97764	0.99066	0.98435	0.983163	0.00285929	1.15709	0.953772	0.957088	0.954883	1.00571	0.0504651	4.93333				1.58258	1.3045	1.30903	1.30602
70084	68719	72202	64649	66875	70261	69251	70047		0.984201	0.983695	0.994614	0.987068	0.987395	0.00251832	1.15992	0.962664	0.956757	0.964383	1.01093	0.0496891	4.95				1.58645	1.31666	1.30858	1.31901
69428	68348	72361	64916	66675	69454	69084	69452		0.974989	0.978385	0.996804	0.991144	0.985331	0.00516909	1.15645	0.951607	0.954449	0.956191	1.00467	0.0506001	4.96667				1.5817	1.30154	1.30542	1.30781
69700	68385	72239	64825	66513	69396	68853	69485		0.978809	0.978914	0.995123	0.989755	0.98565	0.0040699	1.15364	0.950812	0.951258	0.956646	1.00309	0.0502007	4.98333				1.57786	1.30045	1.30106	1.30843
69918	68463	71962	64233	66674	69803	69128	68905		0.98187	0.980031	0.991308	0.980716	0.983481	0.00263625	1.15643	0.956389	0.955057	0.94866	1.00413	0.0507934	5				1.58168	1.30808	1.30626	1.29751
69810	68734	71988	64548	66599	69852	69440	69488		0.980354	0.98391	0.991666	0.985526	0.985364	0.00236215	1.15513	0.95706	0.959368	0.956687	1.00706	0.0493597	5.01667				1.5799	1.309	1.31215	1.30848
69770	68897	72271	64400	67002	69254	68807	69269		0.979792	0.986244	0.995564	0.983266	0.986216	0.00338332	1.16212	0.948867	0.950622	0.953672	1.00382	0.0527758	5.03333				1.58946	1.29779	1.30019	1.30436
69777	68158	72111	64812	66627	70215	69002	69130		0.97989	0.975665	0.99336	0.989557	0.984618	0.00411629	1.15562	0.962034	0.953316	0.951758	1.00568	0.0500292	5.05				1.58056	1.3158	1.30387	1.30174
69491	68175	72040	64258	66385	69554	69763	68720		0.975874	0.975908	0.992382	0.981098	0.981316	0.00388768	1.15142	0.952977	0.96383	0.946113	1.00358	0.0494125	5.06667				1.57482	1.30341	1.31825	1.29402
69749	68452	71877	64318	66660	69885	69481	69114		0.979497	0.979873	0.990137	0.982014	0.98288	0.00248151	1.15619	0.957512	0.959934	0.951538	1.00629	0.049996	5.08333				1.58135	1.30961	1.31293	1.30144
70055	68858	71620	64215	66204	69831	69410	68976		0.983794	0.985685	0.986597	0.980442	0.984129	0.00136075	1.14828	0.956773	0.958953	0.949638	1.00341	0.0483303	5.1				1.57053	1.3086	1.31158	1.29884
69473	67971	71985	64271	66398	69961	69373	69665		0.975621	0.972988	0.991625	0.981297	0.980383	0.00412884	1.15164	0.958554	0.958442	0.959124	1.00694	0.0482344	5.11667				1.57513	1.31104	1.31089	1.31182
69865	68300	71914	63996	66758	69793	68837	69273		0.981126	0.977698	0.990646	0.977098	0.981642	0.00312989	1.15789	0.956252	0.951037	0.953727	1.00473	0.051065	5.13333				1.58367	1.30789	1.30076	1.30444
70338	68154	72229	64132	67068	69628	69581	69239		0.987768	0.975608	0.994986	0.979174	0.984384	0.00435905	1.16326	0.953991	0.961316	0.953259	1.00796	0.0518009	5.15				1.59103	1.3048	1.31482	1.3038
70113	68320	71999	64233	66549	70140	68474	69418		0.984609	0.977984	0.991817	0.980716	0.983782	0.0030037	1.15426	0.961006	0.946022	0.955723	1.00425	0.0500992	5.16667				1.57871	1.31439	1.2939	1.30717
69935	68140	71830	64506	66650	69420	68736	69937		0.982109	0.975407	0.989489	0.984885	0.982973	0.00294539	1.15601	0.951141	0.949641	0.962869	1.00492	0.0504527	5.18333				1.58111	1.3009	1.29885	1.31694
69793	68321	72958	64365	66960	69873	68417	69184		0.980115	0.977998	1.00503	0.982732	0.986468	0.00626188	1.16139	0.957348	0.945234	0.952502	1.00412	0.0524832	5.2				1.58846	1.30939	1.29282	1.30276
69925	68192	73254	64106	66805	70114	68540	69169		0.981969	0.976152	1.00911	0.978777	0.986501	0.0076282	1.1587	0.96065	0.946934	0.952295	1.00465	0.0514299	5.21667				1.58479	1.3139	1.29514	1.30248
70064	68403	72881	64309	66494	70110	68588	69540		0.983921	0.979172	1.00397	0.981877	0.987234	0.00566185	1.15331	0.960595	0.947597	0.957403	1.00473	0.0496047	5.23333				1.57741	1.31383	1.29605	1.30946
69582	68340	73720	64095	66364	69947	68476	69268		0.977152	0.97827	1.01552	0.978609	0.987389	0.00938378	1.15105	0.958362	0.946049	0.953658	1.00228	0.0496558	5.25				1.57432	1.31078	1.29394	1.30434
69643	68128	72583	63464	66630	70224	68742	69837		0.978008	0.975235	0.999862	0.968975	0.98052	0.00671838	1.15567	0.962157	0.949724	0.961492	1.00726	0.0495514	5.26667				1.58063	1.31597	1.29896	1.31506
69973	68460	73011	63703	66994	71050	68765	69715		0.982643	0.979988	1.00576	0.972624	0.985253	0.00715588	1.16198	0.973474	0.950042	0.959812	1.01133	0.0504472	5.28333				1.58927	1.33145	1.2994	1.31276
69392	68621	72581	64258	66639	69964	68586	69051		0.974484	0.982293	0.999835	0.981098	0.984427	0.0054153	1.15582	0.958595	0.947569	0.95067	1.00316	0.0509392	5.3				1.58085	1.31109	1.29601	1.30026
70097	68006	72449	63850	66764	70118	68824	69516		0.984384	0.973489	0.998016	0.974869	0.98269	0.00565388	1.15799	0.960705	0.950857	0.957072	1.00666	0.050486	5.31667				1.58381	1.31398	1.30051	1.30901
70520	68588	72687	64251	66675	70149	68460	69221		0.990324	0.98182	1.00129	0.980991	0.988608	0.00472574	1.15645	0.96113	0.945828	0.953011	1.0041	0.0508773	5.33333				1.5817	1.31456	1.29363	1.30346
69998	68374	72229	63725	66424	69677	68222	68893		0.982994	0.978757	0.994986	0.97296	0.982424	0.00466488	1.15209	0.954663	0.94254	0.948495	0.999448	0.0509422	5.35				1.57575	1.30572	1.28914	1.29728
69805	68193	72512	63996	66597	69948	68626	69395		0.980283	0.976166	0.998884	0.977098	0.983108	0.00533214	1.15509	0.958376	0.948122	0.955407	1.00425	0.0503279	5.36667				1.57985	1.31079	1.29677	1.30673
70085	68223	72062	64448	66717	69825	68382	69498		0.984215	0.976595	0.992685	0.983999	0.984374	0.00328823	1.15718	0.95669	0.944751	0.956825	1.00386	0.0511836	5.38333				1.5827	1.30849	1.29216	1.30867
70442	68185	72573	63849	66814	70285	68890	68559		0.989229	0.976051	0.999724	0.974853	0.984965	0.00589999	1.15886	0.962993	0.951769	0.943897	1.00438	0.051642	5.4				1.585	1.31711	1.30176	1.29099
70231	68199	72206	63959	66764	70285	68694	68893		0.986266	0.976252	0.994669	0.976533	0.98343	0.00441069	1.15799	0.962993	0.949061	0.948495	1.00464	0.0512286	5.41667				1.58381	1.31711	1.29805	1.29728
70235	68344	71995	64340	67039	69816	68792	68772		0.986322	0.978327	0.991762	0.98235	0.98469	0.00286702	1.16276	0.956567	0.950415	0.946829	1.00414	0.0529109	5.43333				1.59034	1.30832	1.29991	1.295
70231	68389	71851	63434	66523	69757	68392	68558		0.986266	0.978972	0.989779	0.968517	0.980883	0.0046964	1.15381	0.955759	0.944889	0.943883	0.999585	0.0514789	5.45				1.5781	1.30721	1.29235	1.29097
70651	68065	71499	63568	67445	69897	68662	69160		0.992164	0.974334	0.98493	0.970563	0.980498	0.00493656	1.1698	0.957677	0.948619	0.952171	1.00707	0.0542772	5.46667				1.59997	1.30984	1.29745	1.30231
70137	67965	71789	63401	67133	69424	68129	69376		0.984946	0.972902	0.988925	0.968013	0.978696	0.00492756	1.16439	0.951196	0.941255	0.955145	1.003	0.0538775	5.48333				1.59257	1.30097	1.28738	1.30638
69772	67938	72106	63747	66920	69760	68106	69493		0.97982	0.972516	0.993291	0.973296	0.979731	0.00480764	1.1607	0.9558	0.940938	0.956756	1.00355	0.0525082	5.5				1.58751	1.30727	1.28694	1.30858
70079	68566	71831	63845	67437	69830	68497	68672		0.984131	0.981505	0.989503	0.974792	0.982483	0.00305642	1.16966	0.956759	0.94634	0.945453	1.00455	0.0550967	5.51667				1.59978	1.30858	1.29433	1.29312
69873	67577	72343	64075	67611	69889	68784	68673		0.981238	0.967348	0.996556	0.978304	0.980862	0.00602507	1.17268	0.957567	0.950305	0.945466	1.00651	0.0554482	5.53333				1.60391	1.30969	1.29976	1.29314
69734	68393	72362	64082	67260	69721	68382	68834		0.979286	0.979029	0.996818	0.978411	0.983386	0.00448106	1.16659	0.955265	0.944751	0.947683	1.00357	0.0543855	5.55				1.59558	1.30654	1.29216	1.29617
70369	68075	72145	64246	66735	69586	68585	68841		0.988204	0.974477	0.993829	0.980915	0.984356	0.00422271	1.15749	0.953416	0.947555	0.947779	1.00156	0.0519939	5.56667				1.58313	1.30401	1.29599	1.2963
71017	67733	72373	63869	66663	70015	68782	69351		0.997304	0.969581	0.996969	0.975159	0.984753	0.00723991	1.15624	0.959294	0.950277	0.954801	1.00515	0.0503959	5.58333				1.58142	1.31205	1.29972	1.3059
71256	68322	72534	62970	67132	69455	68854	68975		1.00066	0.978013	0.999187	0.961433	0.984823	0.00935694	1.16437	0.951621	0.951272	0.949624	1.00422	0.0533856	5.6				1.59254	1.30156	1.30108	1.29882
70417	68260	72176	64374	67280	69260	68734	68850		0.988878	0.977125	0.994256	0.982869	0.985782	0.00370601	1.16694	0.948949	0.949614	0.947903	1.00335	0.0545309	5.61667				1.59605	1.2979	1.29881	1.29647
71448	67956	72292	63456	66330	69831	68256	68576		1.00336	0.972773	0.995854	0.968853	0.985209	0.00848918	1.15046	0.956773	0.94301	0.944131	0.998594	0.0507193	5.63333				1.57352	1.3086	1.28978	1.29131
71137	68239	72514	63583	66315	69995	68678	69060		0.998989	0.976824	0.998912	0.970792	0.986379	0.00736161	1.1502	0.95902	0.94884	0.950794	1.00221	0.049379	5.65				1.57316	1.31167	1.29775	1.30043
70603	67729	72556	63604	66593	70075	68522	69104		0.99149	0.969524	0.99949	0.971113	0.982904	0.00745477	1.15503	0.960116	0.946685	0.9514	1.00331	0.0506495	5.66667				1.57976	1.31317	1.2948	1.30125
70308	67607	72141	64013	66486	69299	67895	68968		0.987347	0.967777	0.993774	0.977357	0.981564	0.00570292	1.15317	0.949483	0.938022	0.949528	0.997551	0.0519435	5.68333				1.57722	1.29863	1.28296	1.29869
70201	68135	72023	63846	66697	69090	68416	69300		0.985844	0.975336	0.992148	0.974808	0.982034	0.00422198	1.15683	0.94662	0.94522	0.954099	1.00069	0.0520822	5.7				1.58222	1.29472	1.2928	1.30494
70283	67802	71906	63935	66397	69460	68857	68819		0.986996	0.970569	0.990536	0.976166	0.981067	0.0046462	1.15163	0.951689	0.951313	0.947476	1.00053	0.0503756	5.71667				1.57511	1.30165	1.30113	1.29589
70419	68071	71740	63812	66379	69786	68088	68726		0.988906	0.97442	0.98825	0.974289	0.981466	0.0041083	1.15131	0.956156	0.940689	0.946196	0.998589	0.0510089	5.73333				1.57468	1.30776	1.2866	1.29414
70000	67968	71766	63695	66669	69463	68335	68623		0.983022	0.972945	0.988608	0.972502	0.979269	0.00394839	1.15634	0.95173	0.944101	0.944778	0.999238	0.0523968	5.75				1.58156	1.30171	1.29127	1.2922
69991	67905	72417	63673	66076	69974	68610	68504		0.982895	0.972043	0.997576	0.972166	0.98117	0.00603105	1.14606	0.958732	0.947901	0.94314	0.998958	0.049142	5.76667				1.56749	1.31128	1.29647	1.28996
69556	67910	71828	63760	66229	69179	68283	69022		0.976787	0.972115	0.989462	0.973495	0.977964	0.00395573	1.14871	0.947839	0.943383	0.950271	0.997551	0.0504071	5.78333				1.57112	1.29638	1.29029	1.29971
69568	67755	71752	63484	66406	69925	67961	68602		0.976955	0.969896	0.988415	0.969281	0.976137	0.00444761	1.15178	0.95806	0.938934	0.944489	0.998316	0.0513127	5.8				1.57532	1.31036	1.2842	1.2918
69378	68205	70929	63517	66488	70169	67946	69043		0.974287	0.976338	0.977078	0.969784	0.974372	0.00163905	1.1532	0.961404	0.938727	0.95056	1.00097	0.0509543	5.81667				1.57727	1.31494	1.28392	1.30011
69478	67913	71676	63603	66329	69342	67981	69085		0.975691	0.972158	0.987368	0.971097	0.976579	0.00372808	1.15045	0.950073	0.939211	0.951139	0.997717	0.0509811	5.83333				1.57349	1.29944	1.28458	1.3009
69278	68159	71826	63288	66212	69353	68346	69166		0.972883	0.975679	0.989434	0.966288	0.976071	0.00486999	1.14842	0.950223	0.944253	0.952254	0.998787	0.0499057	5.85				1.57072	1.29964	1.29148	1.30242
69841	67737	71366	63868	65982	69494	68452	69104		0.980789	0.969638	0.983098	0.975144	0.977167	0.00301474	1.14443	0.952155	0.945718	0.9514	0.998425	0.0486888	5.86667				1.56526	1.30229	1.29348	1.30125
69184	67843	71380	64133	66067	69351	68309	69216		0.971563	0.971156	0.98329	0.97919	0.9763	0.0029738	1.1459	0.950196	0.943742	0.952942	0.998196	0.0492733	5.88333				1.56728	1.29961	1.29078	1.30336
69618	68029	71606	64016	66070	69600	68009	69147		0.977657	0.973818	0.986404	0.977403	0.978821	0.00267531	1.14595	0.953608	0.939597	0.951992	0.997788	0.0494879	5.9				1.56735	1.30427	1.28511	1.30206
69685	68208	71524	63558	66298	69629	68382	69091		0.978598	0.976381	0.985274	0.97041	0.977666	0.0030693	1.14991	0.954005	0.944751	0.951221	0.999971	0.0500167	5.91667				1.57276	1.30482	1.29216	1.30101
69451	67481	71517	64282	66318	69197	68588	69198		0.975312	0.965974	0.985178	0.981465	0.976982	0.00419553	1.15026	0.948086	0.947597	0.952694	0.999658	0.0502123	5.93333				1.57323	1.29672	1.29605	1.30302
69247	67951	71391	63592	66389	69449	68369	69096		0.972447	0.972702	0.983442	0.97093	0.97488	0.00288062	1.15149	0.951539	0.944571	0.95129	0.999722	0.0506142	5.95				1.57492	1.30144	1.29191	1.3011
69664	67796	71136	63899	65920	69502	68487	68945		0.978303	0.970483	0.979929	0.975617	0.976083	0.00206762	1.14335	0.952265	0.946201	0.949211	0.997757	0.0485475	5.96667				1.56379	1.30244	1.29414	1.29826
69571	68204	71431	64010	66799	69674	68498	68776		0.976997	0.976323	0.983993	0.977312	0.978656	0.00179078	1.1586	0.954621	0.946353	0.946884	1.00161	0.0523621	5.98333				1.58464	1.30566	1.29435	1.29508
69022	67821	71388	63411	66267	68972	68785	68932		0.969288	0.970841	0.983401	0.968166	0.972924	0.00353507	1.14937	0.945003	0.950318	0.949032	0.998431	0.0503261	6				1.57202	1.2925	1.29977	1.29801
69320	67891	71230	63601	66304	69042	68602	69005		0.973472	0.971843	0.981224	0.971067	0.974402	0.00232875	1.15001	0.945962	0.94779	0.950037	0.998451	0.0505277	6.01667				1.5729	1.29382	1.29632	1.29939
69406	68162	71196	63342	66634	69275	68415	68420		0.97468	0.975722	0.980756	0.967112	0.974568	0.00281687	1.15574	0.949155	0.945207	0.941983	0.99802	0.0525926	6.03333				1.58073	1.29818	1.29278	1.28837
69386	67883	71291	63449	66519	69183	68541	68525		0.974399	0.971728	0.982064	0.968746	0.974235	0.0028539	1.15374	0.947894	0.946947	0.943429	0.998003	0.0519219	6.05				1.578	1.29646	1.29516	1.29035
68976	67450	71274	63945	66734	69468	68453	69214		0.968642	0.96553	0.98183	0.976319	0.97308	0.00369413	1.15747	0.951799	0.945732	0.952915	1.00198	0.0518547	6.06667				1.5831	1.3018	1.2935	1.30333
68585	67677	71560	63996	67377	69016	68460	69014		0.963151	0.96878	0.98577	0.977098	0.9737	0.00493903	1.16862	0.945606	0.945828	0.950161	1.00255	0.0553662	6.08333				1.59836	1.29333	1.29363	1.29956
69340	67600	71385	63756	66673	69563	67969	69068		0.973753	0.967677	0.983359	0.973433	0.974556	0.0032496	1.15641	0.953101	0.939045	0.950905	0.999866	0.0522737	6.1				1.58166	1.30358	1.28435	1.30058
69168	68081	71161	63396	67537	69341	68509	68905		0.971338	0.974563	0.980274	0.967937	0.973528	0.00262408	1.1714	0.950059	0.946505	0.94866	1.00416	0.0557524	6.11667				1.60215	1.29942	1.29456	1.29751
69247	67686	72078	63932	67083	69842	68299	68895		0.972447	0.968908	0.992906	0.976121	0.977595	0.00531151	1.16352	0.956923	0.943604	0.948523	1.00314	0.0535309	6.13333				1.59138	1.30881	1.29059	1.29732
69267	67482	71560	63374	66720	69441	68217	69162		0.972728	0.965988	0.98577	0.967601	0.973022	0.00448571	1.15723	0.951429	0.942471	0.952199	1.00083	0.0521789	6.15				1.58277	1.30129	1.28904	1.30235
69066	67815	70986	63476	66992	69309	67723	68707		0.969905	0.970755	0.977863	0.969158	0.97192	0.00200748	1.16195	0.94962	0.935646	0.945934	0.998287	0.0546332	6.16667				1.58922	1.29882	1.27971	1.29378
69244	67327	70969	63150	66675	69218	68121	68434		0.972405	0.963769	0.977629	0.964181	0.969496	0.00336214	1.15645	0.948374	0.941145	0.942176	0.997036	0.0531614	6.18333				1.5817	1.29711	1.28723	1.28864
69333	67459	70954	63140	66964	69136	67928	68960		0.973655	0.965659	0.977422	0.964028	0.970191	0.00319904	1.16146	0.94725	0.938478	0.949418	0.999152	0.0541546	6.2				1.58856	1.29558	1.28358	1.29854
69241	67292	70961	63542	66478	69193	67804	68836		0.972363	0.963268	0.977518	0.970166	0.970829	0.00295389	1.15303	0.948031	0.936765	0.94771	0.996384	0.0522811	6.21667				1.57703	1.29665	1.28124	1.29621
69102	67488	71374	63413	66946	69435	67792	69051		0.970411	0.966074	0.983208	0.968197	0.971972	0.00384836	1.16115	0.951347	0.936599	0.95067	0.999941	0.0538431	6.23333				1.58813	1.30118	1.28101	1.30026
69197	67502	70962	63189	67541	71419	67592	69005		0.971745	0.966274	0.977532	0.964776	0.970082	0.00289998	1.17147	0.97853	0.933836	0.950037	1.00847	0.0551131	6.25				1.60225	1.33836	1.27723	1.29939
69484	67962	71464	63415	67340	71397	67652	68587		0.975776	0.972859	0.984448	0.968227	0.975327	0.00341424	1.16798	0.978229	0.934665	0.944282	1.00629	0.0547013	6.26667				1.59748	1.33795	1.27836	1.29152
69468	67341	70992	63185	66812	71168	67945	68895		0.975551	0.96397	0.977946	0.964715	0.970545	0.0036176	1.15882	0.975091	0.938713	0.948523	1.00529	0.0517523	6.28333				1.58495	1.33366	1.2839	1.29732
69331	67620	71093	63362	66723	71262	68180	68268		0.973627	0.967964	0.979337	0.967418	0.972086	0.00279486	1.15728	0.976379	0.94196	0.93989	1.00388	0.0518144	6.3				1.58284	1.33542	1.28834	1.28551
69020	68147	70783	63160	66942	69912	68070	68724		0.96926	0.975507	0.975066	0.964334	0.971042	0.00265071	1.16108	0.957882	0.94044	0.946168	1.00139	0.0533524	6.31667				1.58804	1.31012	1.28626	1.2941
69284	67419	71297	63658	66456	70302	68098	68361		0.972967	0.965086	0.982147	0.971937	0.973034	0.003505	1.15265	0.963226	0.940827	0.941171	0.999468	0.0513285	6.33333				1.57651	1.31743	1.28679	1.28726
68675	67656	70921	63067	67086	69575	67883	68219		0.964415	0.968479	0.976967	0.962914	0.968194	0.00315198	1.16358	0.953265	0.937857	0.939216	0.998478	0.0551427	6.35				1.59145	1.3038	1.28273	1.28459
68654	67908	71436	63414	66711	69215	67825	68672		0.96412	0.972086	0.984062	0.968212	0.97212	0.00430007	1.15707	0.948333	0.937055	0.945453	0.996978	0.0534183	6.36667				1.58256	1.29706	1.28163	1.29312
69322	67762	71418	63212	67133	69578	68027	68631		0.973501	0.969996	0.983814	0.965128	0.97311	0.00395957	1.16439	0.953306	0.939846	0.944888	1.00061	0.0546651	6.38333				1.59257	1.30386	1.28545	1.29235
68266	67886	71990	63299	67231	69060	68023	68831		0.958671	0.971771	0.991693	0.966456	0.972148	0.00704861	1.16609	0.946209	0.939791	0.947642	0.999933	0.0554124	6.4				1.59489	1.29415	1.28538	1.29611
69202	67891	71632	63270	66657	69531	68319	68447		0.971815	0.971843	0.986762	0.966013	0.974108	0.00443501	1.15614	0.952662	0.94388	0.942355	0.998758	0.0525083	6.41667				1.58128	1.30298	1.29097	1.28888
69090	67667	71121	63587	66601	69197	67935	68699		0.970243	0.968636	0.979723	0.970853	0.972364	0.00249711	1.15516	0.948086	0.938575	0.945824	0.996912	0.0527896	6.43333				1.57995	1.29672	1.28371	1.29363
69190	67757	70627	63155	66678	69713	67553	68377		0.971647	0.969925	0.972917	0.964257	0.969687	0.00191082	1.1565	0.955156	0.933297	0.941391	0.996586	0.0534952	6.45				1.58177	1.30639	1.27649	1.28756
69627	67514	71628	63041	66247	69500	67483	68552		0.977784	0.966446	0.986707	0.962517	0.973363	0.0055006	1.14902	0.952237	0.93233	0.9438	0.994348	0.0517199	6.46667				1.57155	1.3024	1.27517	1.29086
68873	67679	71056	63531	66828	69671	68061	68865		0.967195	0.968808	0.978827	0.969998	0.971207	0.00260412	1.1591	0.95458	0.940316	0.94811	1.00053	0.0529386	6.48333				1.58533	1.3056	1.28609	1.29675
68993	67810	71106	63158	66257	69822	67644	68547		0.96888	0.970683	0.979516	0.964303	0.970846	0.00318678	1.1492	0.956649	0.934555	0.943732	0.996033	0.0512555	6.5				1.57179	1.30843	1.27821	1.29077
69108	68335	71174	63348	65760	69160	67676	68585		0.970495	0.978199	0.980453	0.967204	0.974088	0.00313185	1.14058	0.947579	0.934997	0.944255	0.991852	0.0496466	6.51667				1.56	1.29603	1.27882	1.29148
69007	67675	71397	63001	66039	69214	67613	68382		0.969077	0.968751	0.983525	0.961906	0.970815	0.00454775	1.14542	0.948319	0.934126	0.94146	0.99233	0.0511109	6.53333				1.56661	1.29704	1.27763	1.28766
68921	67749	71470	63198	66853	69339	67943	69195		0.967869	0.96981	0.98453	0.964914	0.971781	0.00436735	1.15954	0.950032	0.938686	0.952653	1.00023	0.0531894	6.55				1.58593	1.29938	1.28386	1.30297
68808	68084	71137	63017	66299	69115	67775	68494		0.966282	0.974606	0.979943	0.96215	0.970745	0.00401342	1.14993	0.946962	0.936365	0.943002	0.994064	0.0520001	6.56667				1.57278	1.29518	1.28069	1.28977
68847	67190	71172	63517	66362	68851	67024	68416		0.96683	0.961808	0.980425	0.969784	0.969712	0.00393225	1.15102	0.943345	0.925989	0.941928	0.99057	0.0536274	6.58333				1.57428	1.29024	1.2665	1.2883
68865	67786	71039	62867	66465	69460	67490	68832		0.967083	0.97034	0.978593	0.95986	0.968969	0.00388404	1.15281	0.951689	0.932427	0.947655	0.996144	0.0523848	6.6				1.57672	1.30165	1.2753	1.29613
69163	67716	71388	62820	66279	69248	67965	69117		0.971268	0.969338	0.983401	0.959143	0.970787	0.00497517	1.14958	0.948785	0.93899	0.951579	0.997233	0.0508537	6.61667				1.57231	1.29768	1.28428	1.3015
68670	67310	70362	62929	66241	69135	67097	68598		0.964344	0.963526	0.969267	0.960807	0.964486	0.00176391	1.14892	0.947236	0.926997	0.944434	0.991897	0.0525322	6.63333				1.57141	1.29556	1.26788	1.29173
69161	67352	70763	62928	66593	68780	67860	69006		0.97124	0.964127	0.974791	0.960791	0.967737	0.00320542	1.15503	0.942373	0.937539	0.950051	0.996247	0.0529889	6.65				1.57976	1.28891	1.2823	1.29941
69195	67633	71077	63506	66435	68866	67416	68779		0.971717	0.96815	0.979116	0.969616	0.97215	0.00243482	1.15229	0.943551	0.931405	0.946926	0.993542	0.0530194	6.66667				1.57601	1.29052	1.27391	1.29513
69257	67646	71077	62795	65896	69406	68369	68597		0.972588	0.968336	0.979116	0.958761	0.9697	0.00426746	1.14294	0.950949	0.944571	0.94442	0.995719	0.049096	6.68333				1.56322	1.30064	1.29191	1.29171
69635	67428	71126	63301	65881	69063	68364	68741		0.977896	0.965215	0.979791	0.966487	0.972347	0.00377955	1.14268	0.94625	0.944502	0.946403	0.994958	0.0492414	6.7				1.56287	1.29421	1.29182	1.29442
69188	67364	70832	63168	65838	69458	68063	68584		0.971619	0.964299	0.975741	0.964456	0.969029	0.00281441	1.14193	0.951662	0.940343	0.944241	0.994544	0.0491848	6.71667				1.56185	1.30161	1.28613	1.29146
69849	67455	70859	62470	66216	69277	68557	68379		0.980901	0.965602	0.976113	0.953799	0.969104	0.00601959	1.14849	0.949182	0.947168	0.941419	0.996564	0.0506676	6.73333				1.57081	1.29822	1.29547	1.2876
69388	67239	70691	63253	66152	69133	67439	68771		0.974427	0.96251	0.973799	0.965754	0.969122	0.00295933	1.14738	0.947209	0.931722	0.946816	0.993281	0.0514916	6.75				1.5693	1.29552	1.27434	1.29498
69649	67292	70749	63696	66298	69225	68163	68673		0.978093	0.963268	0.974598	0.972517	0.972119	0.00316654	1.14991	0.94847	0.941725	0.945466	0.996392	0.0511907	6.76667				1.57276	1.29725	1.28802	1.29314
69283	66634	70673	64097	66052	68861	67545	68249		0.972953	0.953849	0.973551	0.97864	0.969748	0.00545109	1.14564	0.943482	0.933187	0.939629	0.990485	0.0517626	6.78333				1.56692	1.29042	1.27634	1.28515
69974	66937	70752	63370	66212	69084	67622	68727		0.982657	0.958187	0.974639	0.96754	0.970756	0.00520448	1.14842	0.946538	0.934251	0.94621	0.993854	0.0516004	6.8				1.57072	1.2946	1.2778	1.29415
69755	66860	71178	63197	66296	69079	67254	68123		0.979581	0.957084	0.980508	0.964899	0.970518	0.00572987	1.14987	0.946469	0.929166	0.937894	0.990851	0.0531253	6.81667				1.57271	1.29451	1.27084	1.28278
69493	67562	70541	62922	65900	69091	67955	68180		0.975902	0.967133	0.971733	0.9607	0.968867	0.00325845	1.14301	0.946634	0.938851	0.938679	0.991792	0.0504386	6.83333				1.56332	1.29473	1.28409	1.28385
69700	67151	70738	63134	65795	69054	67841	68995		0.978809	0.96125	0.974447	0.963937	0.969611	0.00418417	1.14118	0.946127	0.937276	0.949899	0.993622	0.0492587	6.85				1.56083	1.29404	1.28194	1.2992
69295	67430	71010	62815	66174	68872	67257	68589		0.973121	0.965244	0.978193	0.959066	0.968906	0.00422552	1.14776	0.943633	0.929208	0.94431	0.991227	0.0522931	6.86667				1.56982	1.29063	1.2709	1.29156
69822	66978	70676	62707	65947	68975	67316	68192		0.980522	0.958774	0.973592	0.957417	0.967576	0.00566042	1.14382	0.945044	0.930023	0.938844	0.989433	0.0515548	6.88333				1.56443	1.29256	1.27202	1.28408
69022	67660	70512	62555	65749	68538	67694	68187		0.969288	0.968536	0.971333	0.955096	0.966063	0.0037031	1.14039	0.939057	0.935245	0.938775	0.988366	0.050681	6.9				1.55974	1.28437	1.27916	1.28399
69386	67459	70670	62461	65428	68880	67818	68229		0.974399	0.965659	0.97351	0.953661	0.966807	0.0048019	1.13482	0.943743	0.936959	0.939353	0.988718	0.0487205	6.91667				1.55212	1.29078	1.2815	1.28478
69193	66648	70594	62783	66014	68869	67635	68180		0.971689	0.95405	0.972463	0.958578	0.964195	0.0046458	1.14498	0.943592	0.93443	0.938679	0.990421	0.0515547	6.93333				1.56602	1.29057	1.27804	1.28385
69483	68043	70755	62693	65805	68809	67591	68223		0.975761	0.974019	0.974681	0.957203	0.970416	0.00441883	1.14136	0.94277	0.933822	0.939271	0.989305	0.0507177	6.95				1.56106	1.28945	1.27721	1.28466
69036	67289	70647	62718	65383	69156	67595	68477		0.969484	0.963225	0.973193	0.957585	0.965872	0.00344384	1.13404	0.947524	0.933878	0.942768	0.989552	0.0482451	6.96667				1.55105	1.29595	1.27729	1.28945
69484	67627	70322	62972	65646	68797	67528	68561		0.975776	0.968064	0.968716	0.961463	0.968505	0.00292526	1.1386	0.942605	0.932952	0.943924	0.989521	0.0497534	6.98333				1.55729	1.28922	1.27602	1.29103
69394	67575	71061	62878	65966	69227	67541	68566		0.974512	0.967319	0.978896	0.960028	0.970189	0.00414303	1.14415	0.948497	0.933132	0.943993	0.992443	0.0506719	7				1.56488	1.29728	1.27627	1.29112
69281	68068	70859	62686	65535	68692	67827	68697		0.972925	0.974377	0.976113	0.957097	0.970128	0.00439236	1.13668	0.941167	0.937083	0.945797	0.99018	0.048864	7.01667				1.55466	1.28726	1.28167	1.29359
69469	67929	70407	63063	65812	68928	67748	68223		0.975565	0.972387	0.969887	0.962853	0.970173	0.0027025	1.14148	0.9444	0.935991	0.939271	0.990286	0.0504277	7.03333				1.56123	1.29168	1.28018	1.28466
69494	68057	70464	62809	65747	69416	67776	68445		0.975916	0.974219	0.970672	0.958975	0.969945	0.00381662	1.14035	0.951087	0.936378	0.942327	0.992536	0.0493645	7.05				1.55969	1.30082	1.28071	1.28884
68928	67968	70933	63178	65355	68106	67563	68552		0.967968	0.972945	0.977133	0.964609	0.970663	0.00275361	1.13355	0.933138	0.933436	0.9438	0.985982	0.0492529	7.06667				1.55039	1.27628	1.27668	1.29086
69884	68057	70736	62611	65765	68858	66778	67827		0.981393	0.974219	0.974419	0.955952	0.971496	0.00544317	1.14066	0.943441	0.92259	0.933819	0.985129	0.05202	7.08333				1.56011	1.29037	1.26185	1.27721
69191	67712	70305	62696	66047	68625	67051	68616		0.971661	0.969281	0.968482	0.957249	0.966668	0.00321139	1.14556	0.940249	0.926362	0.944682	0.989212	0.0522604	7.1				1.5668	1.286	1.26701	1.29206
69478	68498	70664	62654	65262	68302	67455	68364		0.975691	0.980532	0.973427	0.956608	0.971565	0.00520105	1.13194	0.935823	0.931943	0.941212	0.98523	0.0489403	7.11667				1.54818	1.27995	1.27464	1.28732
68979	67676	70910	61918	65442	68928	67414	68593		0.968684	0.968765	0.976816	0.945371	0.964909	0.00678626	1.13506	0.9444	0.931377	0.944365	0.988801	0.0488499	7.13333				1.55245	1.29168	1.27387	1.29163
69156	67318	70393	62541	66059	68920	67170	67813		0.971169	0.963641	0.969694	0.954883	0.964847	0.00369919	1.14576	0.944291	0.928006	0.933626	0.987922	0.0527223	7.15				1.56709	1.29153	1.26926	1.27694
69267	68145	70867	62621	65711	69074	67282	68495		0.972728	0.975479	0.976224	0.956104	0.970134	0.00473652	1.13973	0.946401	0.929553	0.943016	0.989674	0.0501499	7.16667				1.55883	1.29442	1.27137	1.28979
68776	67719	70648	63080	66274	68616	67354	67914		0.965833	0.969381	0.973207	0.963112	0.967883	0.00218991	1.14949	0.940126	0.930548	0.935017	0.988796	0.0536014	7.18333				1.57219	1.28583	1.27273	1.27885
68810	67429	70431	62421	65718	69079	67184	68215		0.96631	0.965229	0.970218	0.953051	0.963702	0.00370857	1.13985	0.946469	0.928199	0.939161	0.98842	0.0506159	7.2				1.559	1.29451	1.26952	1.28451
68488	67747	71365	62411	65639	68885	67317	68781		0.961789	0.969782	0.983084	0.952898	0.966888	0.00640575	1.13848	0.943811	0.930037	0.946953	0.98982	0.0496889	7.21667				1.55713	1.29087	1.27203	1.29517
68160	67346	70617	62319	65830	69053	67970	68320		0.957182	0.964041	0.97278	0.951493	0.961374	0.00458626	1.14179	0.946113	0.939059	0.940606	0.991892	0.0499894	7.23333				1.56166	1.29402	1.28437	1.28649
68877	66983	71152	62295	65525	68948	67247	68391		0.967251	0.958845	0.98015	0.951127	0.964343	0.00621291	1.1365	0.944674	0.92907	0.941584	0.987957	0.0496295	7.25				1.55442	1.29205	1.27071	1.28783
68324	67609	70430	62365	66137	68579	67405	69109		0.959485	0.967806	0.970204	0.952196	0.962423	0.00411043	1.14712	0.939619	0.931253	0.951469	0.992364	0.0517505	7.26667				1.56894	1.28514	1.2737	1.30135
68501	67174	70477	61917	65918	68498	67362	68620		0.961971	0.961579	0.970851	0.945355	0.959939	0.00531175	1.14332	0.938509	0.930659	0.944737	0.989305	0.0514182	7.28333				1.56374	1.28362	1.27288	1.29214
68645	66703	70718	62387	66014	68582	67330	68473		0.963993	0.954837	0.974171	0.952531	0.961383	0.00492907	1.14498	0.93966	0.930216	0.942713	0.989393	0.0519315	7.3				1.56602	1.2852	1.27228	1.28937
68775	67389	70539	62036	66220	68666	66822	68284		0.965819	0.964657	0.971705	0.947172	0.962338	0.00528549	1.14856	0.940811	0.923198	0.940111	0.988169	0.0536172	7.31667				1.57091	1.28677	1.26268	1.28581
68264	66561	69811	62850	66142	68540	67074	68268		0.958643	0.952804	0.961677	0.959601	0.958181	0.00190084	1.1472	0.939084	0.92668	0.93989	0.988214	0.0530824	7.33333				1.56906	1.28441	1.26744	1.28551
68401	66785	70545	62930	66246	68086	66636	68647		0.960567	0.956011	0.971788	0.960822	0.962297	0.00335116	1.14901	0.932864	0.920628	0.945108	0.986902	0.0542656	7.35				1.57153	1.2759	1.25917	1.29265
69060	66858	70813	61989	66431	69136	66972	68417		0.969821	0.957056	0.97548	0.946455	0.962203	0.0065116	1.15222	0.94725	0.92527	0.941942	0.99167	0.0537198	7.36667				1.57591	1.29558	1.26552	1.28832
69224	66720	70093	62680	66922	69021	67162	68534		0.972124	0.95508	0.965561	0.957005	0.962443	0.00395004	1.16073	0.945675	0.927895	0.943553	0.994464	0.0555644	7.38333				1.58756	1.29342	1.26911	1.29052
68680	66781	70385	62055	66084	69026	66946	69203		0.964485	0.955954	0.969584	0.947462	0.959371	0.00486438	1.1462	0.945743	0.924911	0.952763	0.992404	0.0516045	7.4				1.56768	1.29352	1.26502	1.30312
68531	66820	70357	62547	66377	68778	66858	68173		0.962392	0.956512	0.969198	0.954974	0.960769	0.00323249	1.15128	0.942345	0.923695	0.938582	0.988976	0.0542508	7.41667				1.57463	1.28887	1.26336	1.28372
68545	66813	70258	63052	66510	68584	67315	68634		0.962589	0.956412	0.967834	0.962685	0.96238	0.00233646	1.15359	0.939687	0.930009	0.944929	0.992053	0.053933	7.43333				1.57779	1.28523	1.272	1.2924
68760	66838	69755	63177	66194	68813	66990	68012		0.965608	0.956769	0.960905	0.964593	0.961969	0.0020062	1.14811	0.942825	0.925519	0.936366	0.988204	0.0534199	7.45				1.57029	1.28952	1.26586	1.28069
68598	67419	69925	63816	65522	68754	67049	68292		0.963333	0.965086	0.963247	0.97435	0.966504	0.00264927	1.13645	0.942016	0.926334	0.940221	0.986255	0.0501872	7.46667				1.55435	1.28842	1.26697	1.28596
68669	66673	70548	63345	65611	68762	67323	68216		0.96433	0.954408	0.971829	0.967158	0.964431	0.00368163	1.13799	0.942126	0.93012	0.939174	0.987353	0.0502782	7.48333				1.55646	1.28857	1.27215	1.28453
68509	67137	70264	62991	65830	68369	67157	68201		0.962083	0.96105	0.967917	0.961753	0.963201	0.00158677	1.14179	0.936741	0.927826	0.938968	0.986332	0.0518758	7.5				1.56166	1.2812	1.26901	1.28425
68580	66455	70084	63290	65681	68482	67189	67966		0.963081	0.951287	0.965437	0.966319	0.961531	0.00348238	1.13921	0.93829	0.928268	0.935733	0.985374	0.0513217	7.51667				1.55812	1.28332	1.26962	1.27982
68453	66374	70412	63334	65637	68653	67234	68134		0.961297	0.950127	0.969956	0.96699	0.962093	0.00437432	1.13844	0.940632	0.92889	0.938046	0.986503	0.0507096	7.53333				1.55708	1.28653	1.27047	1.28299
68693	66629	70113	62972	65496	69047	67086	68476		0.964667	0.953778	0.965837	0.961463	0.961436	0.00271509	1.136	0.946031	0.926845	0.942754	0.987907	0.0495413	7.55				1.55373	1.29391	1.26767	1.28943
68103	66874	69941	62523	65309	68710	67178	68385		0.956382	0.957285	0.963468	0.954608	0.957936	0.00192599	1.13276	0.941413	0.928116	0.941501	0.985947	0.0490371	7.56667				1.5493	1.28759	1.26941	1.28771
67900	66690	69715	63248	65392	68622	67053	67732		0.953531	0.954651	0.960354	0.965677	0.958553	0.00280544	1.13419	0.940208	0.92639	0.932511	0.983326	0.0503691	7.58333				1.55127	1.28595	1.26705	1.27542
68262	66608	69802	62803	65795	68444	66402	68185		0.958615	0.953477	0.961553	0.958883	0.958132	0.00168739	1.14118	0.937769	0.917395	0.938748	0.983774	0.0527005	7.6				1.56083	1.28261	1.25474	1.28395
68074	66614	70458	62253	65198	68363	66956	68292		0.955975	0.953563	0.970589	0.950486	0.957653	0.00445599	1.13083	0.936659	0.925049	0.940221	0.98319	0.0493198	7.61667				1.54666	1.28109	1.26521	1.28596
68230	66306	69620	62699	65194	68722	66651	68224		0.958165	0.949154	0.959046	0.957295	0.955915	0.00228183	1.13076	0.941578	0.920836	0.939285	0.983115	0.0494338	7.63333				1.54657	1.28782	1.25945	1.28468
68046	66224	69998	62344	65071	68370	67160	68541		0.955581	0.94798	0.964253	0.951875	0.954922	0.00347576	1.12863	0.936755	0.927868	0.943649	0.984225	0.0482424	7.65				1.54365	1.28122	1.26907	1.29065
68525	66587	70038	62142	65244	69065	67342	68249		0.962308	0.953176	0.964804	0.948791	0.95727	0.00377265	1.13163	0.946277	0.930382	0.939629	0.986979	0.0483263	7.66667				1.54776	1.29425	1.27251	1.28515
68286	66371	69520	62383	65349	68590	66746	68592		0.958952	0.950084	0.957668	0.95247	0.954794	0.0021041	1.13345	0.939769	0.922148	0.944351	0.984929	0.0497373	7.68333				1.55025	1.28535	1.26124	1.29161
68820	66479	69577	62628	65117	68212	67231	68348		0.966451	0.95163	0.958453	0.956211	0.958186	0.00309913	1.12943	0.93459	0.928849	0.940992	0.983464	0.0487169	7.7				1.54474	1.27826	1.27041	1.28702
68268	66302	70197	62050	64928	68542	67016	68239		0.958699	0.949097	0.966994	0.947386	0.955544	0.00455683	1.12615	0.939112	0.925878	0.939491	0.982657	0.0479346	7.71667				1.54026	1.28445	1.26635	1.28497
68543	66668	69517	62241	64959	68260	67010	68150		0.962561	0.954336	0.957627	0.950302	0.956206	0.00259413	1.12668	0.935248	0.925795	0.938266	0.981498	0.0484682	7.73333				1.54099	1.27916	1.26623	1.28329
68121	66173	69785	62264	65590	68771	67265	68540		0.956635	0.94725	0.961319	0.950653	0.953964	0.00312594	1.13763	0.942249	0.929318	0.943635	0.988208	0.0499112	7.75				1.55596	1.28874	1.27105	1.29063
68150	66302	70103	61885	64753	68263	66685	68064		0.957042	0.949097	0.965699	0.944867	0.954176	0.0045958	1.12311	0.935289	0.921305	0.937082	0.979197	0.048101	7.76667				1.53611	1.27922	1.26009	1.28167
68208	66147	70507	62365	65112	68710	66585	68278		0.957856	0.946878	0.971264	0.952196	0.957049	0.00524195	1.12934	0.941413	0.919924	0.940028	0.982676	0.0491334	7.78333				1.54462	1.28759	1.2582	1.2857
67943	66202	69595	62355	65064	68752	67192	68079		0.954135	0.947665	0.958701	0.952043	0.953136	0.002293	1.12851	0.941989	0.92831	0.937288	0.984023	0.0482444	7.8				1.54349	1.28838	1.26967	1.28195
68196	66195	69771	61598	65234	68196	67053	68070		0.957688	0.947565	0.961126	0.940485	0.951716	0.00472206	1.13145	0.934371	0.92639	0.937164	0.982345	0.0497556	7.81667				1.54752	1.27796	1.26705	1.28178
67961	66091	70502	61939	65224	68322	67024	68126		0.954388	0.946076	0.971196	0.945691	0.954338	0.00596657	1.13128	0.936097	0.925989	0.937935	0.982826	0.0495547	7.83333				1.54728	1.28032	1.2665	1.28284
68650	65745	70439	62147	65313	68513	66815	67790		0.964064	0.941123	0.970328	0.948867	0.956095	0.00672346	1.13282	0.938714	0.923101	0.933309	0.981987	0.0503831	7.85				1.54939	1.2839	1.26255	1.27651
68419	66558	69955	61781	65081	68171	66813	68310		0.96082	0.952761	0.96366	0.943279	0.95513	0.00457526	1.1288	0.934028	0.923074	0.940469	0.981593	0.0492004	7.86667				1.54389	1.27749	1.26251	1.2863
68632	66519	70398	61944	65685	68684	67071	67798		0.963811	0.952203	0.969763	0.945768	0.957886	0.00544146	1.13928	0.941057	0.926638	0.93342	0.985098	0.0514772	7.88333				1.55822	1.28711	1.26739	1.27666
68309	65627	70167	61964	65487	68613	66846	67651		0.959275	0.939434	0.966581	0.946073	0.952841	0.00616253	1.13584	0.940084	0.92353	0.931396	0.982713	0.051155	7.9				1.55352	1.28578	1.26313	1.27389
68734	66128	69697	61689	65391	68306	66822	67941		0.965243	0.946606	0.960106	0.941874	0.953457	0.00550925	1.13418	0.935878	0.923198	0.935388	0.982161	0.0507571	7.91667				1.55124	1.28002	1.26268	1.27935
68604	66682	70200	61964	65935	68375	67188	67759		0.963418	0.954536	0.967035	0.946073	0.957766	0.00469945	1.14361	0.936824	0.928255	0.932883	0.985393	0.0527689	7.93333				1.56415	1.28132	1.2696	1.27593
68600	65805	69729	61927	66059	67995	67571	67880		0.963361	0.941982	0.960547	0.945508	0.95285	0.00533655	1.14576	0.931617	0.933546	0.934549	0.986369	0.0531351	7.95				1.56709	1.2742	1.27683	1.27821
68266	65953	70033	61902	65483	68488	68119	67819		0.958671	0.944101	0.964735	0.945126	0.953158	0.00509047	1.13577	0.938372	0.941117	0.933709	0.987243	0.0495338	7.96667				1.55343	1.28343	1.28719	1.27706
68899	66632	69858	61820	65805	68917	68337	68055		0.96756	0.953821	0.962324	0.943874	0.956895	0.00518179	1.14136	0.94425	0.944129	0.936958	0.991674	0.0499239	7.98333				1.56106	1.29147	1.29131	1.2815
68323	66087	69901	61600	65987	68112	68396	67740		0.959471	0.946019	0.962917	0.940515	0.952231	0.00534202	1.14451	0.93322	0.944944	0.932621	0.988825	0.0519741	8				1.56538	1.27639	1.29242	1.27557
68193	65614	70218	61873	65577	68442	67591	68176		0.957646	0.939248	0.967283	0.944684	0.952215	0.00633383	1.1374	0.937741	0.933822	0.938624	0.986898	0.0501794	8.01667				1.55566	1.28257	1.27721	1.28378
68014	66509	70113	62119	65591	68420	67758	68111		0.955132	0.95206	0.965837	0.94844	0.955367	0.00374834	1.13765	0.93744	0.93613	0.937729	0.987236	0.0501379	8.03333				1.55599	1.28216	1.28037	1.28256
68697	66202	70139	62031	65607	68549	67347	67881		0.964724	0.947665	0.966195	0.947096	0.95642	0.0052288	1.13792	0.939208	0.930451	0.934562	0.985536	0.0508273	8.05				1.55637	1.28458	1.2726	1.27822
68533	66170	69942	61524	65676	68471	67396	67988		0.96242	0.947207	0.963481	0.939355	0.953116	0.00590403	1.13912	0.938139	0.931128	0.936035	0.986106	0.0510261	8.06667				1.558	1.28312	1.27353	1.28024
68453	65994	70092	61818	65580	68467	67155	67705		0.961297	0.944688	0.965548	0.943844	0.953844	0.0056003	1.13746	0.938084	0.927799	0.932139	0.983869	0.0512388	8.08333				1.55573	1.28304	1.26897	1.27491
68518	66395	70198	61800	65090	68207	67030	67765		0.96221	0.950428	0.967008	0.943569	0.955804	0.00536311	1.12896	0.934522	0.926072	0.932965	0.980629	0.0494767	8.1				1.5441	1.27817	1.26661	1.27604
68838	66459	69254	61779	65195	68387	66589	67975		0.966704	0.951344	0.954004	0.943248	0.953825	0.00486407	1.13078	0.936988	0.919979	0.935856	0.9809	0.0501098	8.11667				1.54659	1.28154	1.25828	1.27999
68651	65975	70177	61919	65002	68517	66997	68202		0.964078	0.944416	0.966719	0.945386	0.955149	0.00594483	1.12743	0.938769	0.925616	0.938982	0.982699	0.0483449	8.13333				1.54201	1.28398	1.26599	1.28427
68800	65936	69962	61860	65428	68040	66758	67970		0.96617	0.943858	0.963757	0.944485	0.954567	0.0060237	1.13482	0.932234	0.922314	0.935788	0.981289	0.0512562	8.15				1.55212	1.27504	1.26147	1.2799
69651	66115	69880	62155	65055	68373	66777	67666		0.978121	0.94642	0.962627	0.948989	0.959039	0.00728714	1.12835	0.936796	0.922576	0.931602	0.979831	0.0495933	8.16667				1.54327	1.28128	1.26183	1.27418
68943	66147	69520	61547	64750	68720	67011	67743		0.968178	0.946878	0.957668	0.939706	0.953108	0.00623382	1.12306	0.94155	0.925809	0.932662	0.98077	0.047539	8.18333				1.53604	1.28778	1.26625	1.27563
69659	65782	69422	61650	65262	68300	66716	67910		0.978233	0.941653	0.956318	0.941279	0.954371	0.00869071	1.13194	0.935796	0.921734	0.934962	0.981108	0.0503805	8.2				1.54818	1.27991	1.26068	1.27877
69634	65483	69392	61443	65277	68459	66928	67570		0.977882	0.937373	0.955905	0.938118	0.95232	0.00953663	1.1322	0.937974	0.924663	0.930281	0.981279	0.0503808	8.21667				1.54854	1.28289	1.26468	1.27237
69822	65978	69471	61732	64923	68532	66325	67909		0.980522	0.944459	0.956993	0.942531	0.956126	0.00874107	1.12606	0.938975	0.916332	0.934948	0.979079	0.0492414	8.23333				1.54014	1.28426	1.25329	1.27875
69995	66111	69349	62188	65017	68902	66929	68106		0.982952	0.946363	0.955312	0.949493	0.95853	0.00834904	1.12769	0.944044	0.924676	0.93766	0.983518	0.0482262	8.25				1.54237	1.29119	1.2647	1.28246
70003	66300	69089	62123	64908	68537	67058	68181		0.983064	0.949068	0.951731	0.948501	0.958091	0.00835407	1.1258	0.939043	0.926459	0.938693	0.982499	0.0478567	8.26667				1.53978	1.28435	1.26714	1.28387
69806	66283	69636	61672	65417	68093	67264	67740		0.980297	0.948825	0.959266	0.941615	0.957501	0.00841845	1.13463	0.93296	0.929305	0.932621	0.982378	0.0507567	8.28333				1.55186	1.27603	1.27103	1.27557
70204	66259	69463	61342	65011	68115	66668	68126		0.985887	0.948481	0.956883	0.936576	0.956957	0.0105045	1.12759	0.933261	0.92107	0.937935	0.979963	0.0493359	8.3				1.54223	1.27644	1.25977	1.28284
69945	66397	69230	61609	64828	67757	66737	67786		0.982249	0.950457	0.953673	0.940653	0.956758	0.00893687	1.12441	0.928356	0.922024	0.933254	0.977012	0.0491873	8.31667				1.53789	1.26974	1.26107	1.27644
69263	66285	69199	61777	64965	68758	66512	68027		0.972672	0.948853	0.953246	0.943218	0.954497	0.00639637	1.12679	0.942071	0.918915	0.936572	0.981087	0.0488178	8.33333				1.54114	1.28849	1.25682	1.28097
69479	66363	69825	61465	65094	68664	66554	67539		0.975705	0.94997	0.96187	0.938454	0.9565	0.00798941	1.12903	0.940783	0.919495	0.929854	0.97979	0.049935	8.35				1.5442	1.28673	1.25762	1.27178
69429	66001	69514	61847	65531	68088	66652	67818		0.975003	0.944788	0.957585	0.944287	0.955416	0.00721792	1.13661	0.932891	0.920849	0.933695	0.98101	0.0519482	8.36667				1.55456	1.27594	1.25947	1.27704
69294	65741	69414	61157	65327	67970	66591	67288		0.973107	0.941066	0.956208	0.933752	0.951033	0.00871798	1.13307	0.931274	0.920007	0.926398	0.977687	0.0518449	8.38333				1.54972	1.27373	1.25832	1.26706
69154	65746	69115	61506	64195	68530	66655	67737		0.971141	0.941138	0.952089	0.93908	0.950862	0.00733784	1.11343	0.938947	0.920891	0.93258	0.976463	0.0458097	8.4				1.52287	1.28422	1.25953	1.27551
69026	65933	69862	61750	65000	67962	66759	67826		0.969344	0.943815	0.962379	0.942806	0.954586	0.00666662	1.1274	0.931165	0.922328	0.933805	0.978673	0.0496348	8.41667				1.54197	1.27358	1.26149	1.27719
69254	65946	69338	61347	65072	67863	66607	67511		0.972546	0.944001	0.955161	0.936653	0.95209	0.00780818	1.12864	0.929808	0.920228	0.929468	0.977037	0.0505845	8.43333				1.54368	1.27172	1.25862	1.27126
68691	66124	69325	61230	65432	67938	66699	67598		0.964639	0.946549	0.954982	0.934866	0.950259	0.00632325	1.13489	0.930836	0.921499	0.930666	0.979472	0.0518513	8.45				1.55222	1.27313	1.26036	1.2729
68106	65999	69136	61556	64529	68433	66624	68143		0.956424	0.944759	0.952378	0.939844	0.948351	0.0037268	1.11923	0.937618	0.920463	0.938169	0.978869	0.046966	8.46667				1.53079	1.2824	1.25894	1.28316
68924	65611	69436	61387	64756	68482	66252	67657		0.967911	0.939205	0.956511	0.937263	0.950223	0.007313	1.12316	0.93829	0.915323	0.931478	0.977064	0.0489375	8.48333				1.53618	1.28332	1.25191	1.27401
68662	65738	69160	62051	64941	68247	66745	67864		0.964232	0.941023	0.952709	0.947401	0.951341	0.0049162	1.12637	0.93507	0.922134	0.934328	0.979476	0.0490551	8.5				1.54057	1.27892	1.26123	1.2779
68529	65735	69356	61191	65004	68087	66785	68102		0.962364	0.94098	0.955409	0.934271	0.948256	0.00644677	1.12747	0.932878	0.922687	0.937605	0.980159	0.0492007	8.51667				1.54206	1.27592	1.26198	1.28239
68458	65801	69699	61863	65203	68600	66410	67615		0.961367	0.941925	0.960134	0.944531	0.951989	0.00509245	1.13092	0.939906	0.917506	0.9309	0.979807	0.0505796	8.53333				1.54678	1.28553	1.2549	1.27322
67816	65787	68697	61206	64851	68377	66209	67912		0.952352	0.941725	0.946331	0.9345	0.943727	0.00376733	1.12481	0.936851	0.914729	0.934989	0.977845	0.0492442	8.55				1.53843	1.28135	1.2511	1.27881
68271	65751	69616	61520	64941	68151	66488	68101		0.958741	0.941209	0.958991	0.939294	0.949559	0.0053879	1.12637	0.933754	0.918584	0.937591	0.979075	0.0492702	8.56667				1.54057	1.27712	1.25637	1.28237
68034	65549	69434	61944	64862	67956	66590	67817		0.955413	0.938318	0.956483	0.945768	0.948995	0.00429812	1.125	0.931083	0.919993	0.933681	0.97744	0.0492769	8.58333				1.53869	1.27346	1.2583	1.27702
67939	66053	68997	61243	64708	68669	66849	68296		0.954079	0.945532	0.950464	0.935065	0.946285	0.00412982	1.12233	0.940852	0.923571	0.940276	0.981757	0.0470289	8.6				1.53504	1.28683	1.26319	1.28604
68471	65747	69107	61765	64757	68101	66682	67621		0.96155	0.941152	0.951979	0.943035	0.949429	0.00467984	1.12318	0.933069	0.921264	0.930983	0.977124	0.0487535	8.61667				1.5362	1.27618	1.26004	1.27333
68518	65634	69690	61616	64973	68397	66369	68100		0.96221	0.939534	0.96001	0.94076	0.950628	0.00607322	1.12693	0.937125	0.91694	0.937577	0.979642	0.0493303	8.63333				1.54133	1.28173	1.25412	1.28235
68136	65869	69027	61535	64792	68054	66586	68457		0.956845	0.942898	0.950877	0.939523	0.947536	0.00391088	1.12379	0.932425	0.919938	0.942492	0.979661	0.0482633	8.65				1.53703	1.2753	1.25822	1.28907
68019	65606	69306	61122	64817	68179	66698	68301		0.955202	0.939134	0.95472	0.933217	0.945568	0.00555669	1.12422	0.934138	0.921485	0.940345	0.980047	0.048218	8.66667				1.53763	1.27764	1.26034	1.28613
68483	66019	69462	61665	64371	67893	66351	67850		0.961718	0.945046	0.956869	0.941508	0.951285	0.00478329	1.11649	0.930219	0.916691	0.934136	0.974383	0.0475148	8.68333				1.52705	1.27228	1.25378	1.27764
67719	65974	69404	61170	64601	68112	66411	67884		0.950989	0.944402	0.95607	0.93395	0.946353	0.00477456	1.12048	0.93322	0.91752	0.934604	0.976455	0.0481629	8.7				1.5325	1.27639	1.25491	1.27828
68339	66064	69436	61406	64878	68082	66298	68018		0.959696	0.94569	0.956511	0.937553	0.949863	0.00508122	1.12528	0.932809	0.915959	0.936448	0.977624	0.0494205	8.71667				1.53907	1.27583	1.25278	1.2808
68149	66210	69185	61647	64671	67925	66534	67990		0.957028	0.94778	0.953053	0.941233	0.949774	0.00341928	1.12169	0.930658	0.919219	0.936063	0.976907	0.0483882	8.73333				1.53416	1.27288	1.25724	1.28028
68231	65778	69479	61354	64730	68175	66208	68315		0.958179	0.941596	0.957103	0.936759	0.94841	0.00542512	1.12271	0.934083	0.914715	0.940537	0.978012	0.0485445	8.75				1.53556	1.27757	1.25108	1.2864
67889	65574	69693	61197	64645	68713	66504	67882		0.953377	0.938676	0.960051	0.934362	0.946616	0.00605126	1.12124	0.941455	0.918805	0.934576	0.979018	0.0476431	8.76667				1.53355	1.28765	1.25667	1.27824
67854	66063	69694	61294	65089	67844	66698	68488		0.952885	0.945676	0.960065	0.935843	0.948617	0.00517278	1.12894	0.929548	0.921485	0.942919	0.980723	0.0496028	8.78333				1.54408	1.27137	1.26034	1.28965
67760	65765	69803	61271	64446	67905	65819	67760		0.951565	0.94141	0.961567	0.935492	0.947508	0.00574217	1.11779	0.930384	0.909341	0.932896	0.972602	0.0486822	8.8				1.52882	1.27251	1.24373	1.27595
67653	65554	69736	61861	64690	68388	66453	68271		0.950062	0.938389	0.960644	0.9445	0.948399	0.00472661	1.12202	0.937002	0.9181	0.939932	0.979263	0.0478305	8.81667				1.53461	1.28156	1.25571	1.28557

## Sheet: exp level
opsin	exp
WT	1
WT	1
WT	1
WT	1
E292A	0.768476
E292A	0.897006
E292A	0.82906
E292A	0.744775

## Sheet: Ca response
opsin	Ca_res	Ca_res_relWT
Antho2aWT	26.6992	0.883716
Antho2aWT	33.0934	1.09536
Antho2aWT	28.6459	0.948152
Antho2aWT	32.411	1.07277
Antho2aE292A	3.87403	0.128227
Antho2aE292A	2.9417	0.0973675
Antho2aE292A	3.30103	0.109261
Antho2aE292A	4.53749	0.150187
Antho2aE292A_norm	5.2986	0.175379
Antho2aE292A_norm	4.02344	0.133172
Antho2aE292A_norm	4.5149	0.149439
Antho2aE292A_norm	6.20604	0.205414
