# Supplementary material for: Coral anthozoan-specific opsins employ a novel chloride counterion for spectral tuning
Source: eLife. 2025 Sep 1;14:RP105451. doi: 10.7554/eLife.105451 (PMC12401545; doi:10.7554/eLife.105451)
Supplement: Figure 5—source data 1. [file elife-105451-fig5-data1.xlsx]

## Sheet: Sheet1
time [s]	mean_rel_response_Antho2a_WT	mean_rel_response_Antho2a_E292A	se_rel_response_Antho2a_WT	se_rel_response_Antho2a_E292A
-1	1.01942	1.06828	0.0071315	0.0517687
-0.98	1.01576	1.05978	0.00711421	0.0510055
-0.97	1.01436	1.06479	0.00528817	0.050843
-0.95	1.01175	1.06219	0.00721633	0.0529153
-0.93	1.01284	1.0665	0.00588376	0.0514059
-0.916667	1.01081	1.05937	0.0048001	0.0513237
-0.9	1.00798	1.05772	0.00487307	0.0509295
-0.88	1.01042	1.06006	0.0051314	0.0527786
-0.87	1.0145	1.06283	0.00344861	0.0521875
-0.85	1.00976	1.06027	0.00568184	0.0495996
-0.833333	1.00824	1.06299	0.00481671	0.0530574
-0.82	1.00778	1.06211	0.00290704	0.0500327
-0.8	1.00516	1.06154	0.00509012	0.0495721
-0.78	1.0056	1.06071	0.00261376	0.0510915
-0.77	1.01057	1.06211	0.00334416	0.0505348
-0.75	1.00858	1.05484	0.00354662	0.0545496
-0.73	1.00223	1.05854	0.00459273	0.0513152
-0.72	1.00794	1.05765	0.00304616	0.0542363
-0.7	1.00589	1.0607	0.00437441	0.0515688
-0.68	1.00771	1.05572	0.00521507	0.0519708
-0.666667	1.00587	1.05855	0.00394362	0.0511094
-0.65	1.00562	1.05926	0.00172019	0.0522958
-0.63	1.00307	1.05607	0.00238789	0.0510369
-0.62	1.00474	1.05611	0.00524805	0.0489686
-0.6	1.00742	1.05529	0.00531585	0.0505785
-0.583333	1.00926	1.05541	0.00149465	0.0537563
-0.57	1.00301	1.05658	0.00446333	0.0495098
-0.55	1.00452	1.06166	0.00327396	0.0489239
-0.53	1.00562	1.05801	0.00329634	0.0498968
-0.52	1.00588	1.05809	0.00368231	0.0505688
-0.5	1.00084	1.05973	0.00270731	0.0498413
-0.48	1.0042	1.05518	0.00476729	0.0507742
-0.47	1.00717	1.0577	0.00363092	0.0493132
-0.45	1.0049	1.0592	0.0035397	0.0499556
-0.43	1.00601	1.05625	0.0031707	0.0510354
-0.416667	1.0049	1.05966	0.00449486	0.0515848
-0.4	1.00132	1.05319	0.00490256	0.0504355
-0.38	1.00416	1.05761	0.00233079	0.0513236
-0.37	1.0016	1.05704	0.0032457	0.0509372
-0.35	0.99969	1.05868	0.00336715	0.0536562
-0.333333	1.00253	1.0549	0.00354784	0.0492384
-0.32	1.00413	1.05795	0.00328649	0.0518945
-0.3	1.00031	1.05505	0.00426438	0.0525787
-0.28	1.0052	1.05417	0.00358984	0.051476
-0.27	0.999313	1.05768	0.00389922	0.0513752
-0.25	1.00607	1.05321	0.0026686	0.0510013
-0.23	1.00442	1.05321	0.00329558	0.0513292
-0.22	1.00218	1.05092	0.0037916	0.051913
-0.2	1.00542	1.05085	0.0042129	0.0496934
-0.18	0.999121	1.05589	0.00337037	0.0535602
-0.166667	1.00053	1.05309	0.00358114	0.0521132
-0.15	1.00115	1.05149	0.00299037	0.05029
-0.13	1.00024	1.05564	0.00383587	0.05074
-0.12	1.00233	1.05398	0.00135918	0.051468
-0.1	0.998924	1.05399	0.00246151	0.0506312
-0.0833333	0.999508	1.05334	0.00218053	0.0514066
-0.07	0.999967	1.05229	0.0021447	0.0499355
-0.05	0.999696	1.05283	0.0041894	0.0529548
-0.03	1.00277	1.05108	0.00169235	0.0510263
-0.02	1	1	0	0
0
0.02
0.03	23.6685	2.47893	1.53476	0.254482
0.05	25.8652	2.82543	1.59939	0.291341
0.07	27.6921	3.10732	1.63035	0.324975
0.08	29.0354	3.32258	1.62891	0.344088
0.1	29.8732	3.47845	1.58823	0.352206
0.12	30.1525	3.57245	1.51673	0.353461
0.13	29.9427	3.64305	1.39217	0.353341
0.15	29.2899	3.65263	1.26645	0.339799
0.17	28.2757	3.60672	1.1122	0.32656
0.18	27.0418	3.54474	0.982648	0.314831
0.2	25.561	3.45813	0.842853	0.299996
0.22	23.994	3.33652	0.717499	0.278007
0.23	22.368	3.2101	0.608622	0.260923
0.25	20.7411	3.06041	0.500488	0.241721
0.27	19.1135	2.91577	0.426029	0.223302
0.28	17.5652	2.76992	0.36044	0.204466
0.3	16.0967	2.62462	0.3027	0.190999
0.32	14.7086	2.48442	0.245982	0.176151
0.33	13.4206	2.34792	0.217109	0.164974
0.35	12.243	2.21479	0.190293	0.148382
0.37	11.1554	2.09732	0.170516	0.139171
0.38	10.1552	1.98507	0.148047	0.129785
0.4	9.23804	1.89011	0.143581	0.123091
0.42	8.42298	1.79725	0.130505	0.113601
0.43	7.67721	1.71627	0.119271	0.106603
0.45	7.00392	1.63729	0.112101	0.102078
0.47	6.40175	1.57216	0.101014	0.0946886
0.48	5.8542	1.51385	0.093387	0.0912509
0.5	5.37317	1.45791	0.0881627	0.0855518
0.52	4.93019	1.4146	0.0830928	0.0806955
0.53	4.54377	1.37111	0.0814312	0.0812845
0.55	4.19277	1.3354	0.0734043	0.0797257
0.57	3.87931	1.31041	0.0704793	0.073056
0.58	3.61484	1.27763	0.0623608	0.0703987
0.6	3.36726	1.25106	0.0614818	0.0686282
0.62	3.14545	1.23208	0.0549793	0.0660684
0.63	2.94382	1.21346	0.0514308	0.0631239
0.65	2.77065	1.19869	0.0491785	0.0627422
0.67	2.61537	1.17958	0.047413	0.0592843
0.68	2.47061	1.17117	0.0452657	0.0629601
0.7	2.34885	1.15334	0.0410143	0.0596959
0.72	2.23492	1.14388	0.035355	0.0598617
0.73	2.13315	1.13777	0.0372751	0.0575895
0.75	2.05104	1.12647	0.0307804	0.0600883
0.77	1.96496	1.12012	0.0291055	0.0571003
0.78	1.89124	1.11424	0.0297991	0.0582894
0.8	1.8258	1.10538	0.0283904	0.0581092
0.82	1.76844	1.10227	0.027306	0.0557566
0.83	1.71216	1.09394	0.0230792	0.0586051
0.85	1.66307	1.09059	0.0197473	0.0552159
0.87	1.62923	1.08506	0.0224284	0.0562458
0.88	1.58104	1.08521	0.0183641	0.0548152
0.9	1.5463	1.0783	0.0198598	0.0552284
0.92	1.51211	1.07805	0.0184993	0.0541554
0.93	1.48074	1.07576	0.0178261	0.0557691
0.95	1.4552	1.07146	0.0171607	0.0518738
0.97	1.42502	1.06996	0.017558	0.0525515
0.98	1.40949	1.06582	0.0172724	0.0536925
1	1.38356	1.06898	0.0162211	0.0547674
1.02	1.36124	1.06332	0.0172457	0.0530929
1.03	1.34793	1.06143	0.0174758	0.0541749
1.05	1.32579	1.0565	0.0141882	0.0526133
1.07	1.31319	1.06295	0.0120895	0.0533856
1.08	1.29786	1.06223	0.0141491	0.0521264
1.1	1.28749	1.06092	0.0153204	0.0521673
1.12	1.27228	1.05911	0.0128714	0.0510272
1.13	1.25958	1.05777	0.0107946	0.0534379
1.15	1.24659	1.05751	0.0126657	0.0519412
1.17	1.23485	1.05273	0.0127648	0.0520715
1.18	1.22507	1.05186	0.0126669	0.0537875
1.2	1.21681	1.05601	0.0123463	0.0541294
1.22	1.2052	1.05106	0.0107968	0.0540206
1.23	1.19707	1.05489	0.0111144	0.0532505
1.25	1.18929	1.05503	0.0084844	0.0543973
1.27	1.18216	1.05057	0.0104452	0.0528161
1.28	1.17834	1.04882	0.0109442	0.053191
1.3	1.16509	1.05038	0.0105889	0.0552724
1.32	1.16421	1.047	0.0110114	0.0550397
1.33	1.15674	1.05106	0.0114679	0.0554834
1.35	1.15188	1.04747	0.00913862	0.0539189
1.37	1.14478	1.049	0.010199	0.0544509
1.38	1.14139	1.04963	0.00854067	0.0551931
1.4	1.13732	1.04274	0.0123495	0.0556683
1.42	1.13213	1.04457	0.0107231	0.0558028
1.43	1.13034	1.04061	0.00892538	0.0519846
1.45	1.12118	1.04604	0.00782191	0.054168
1.47	1.12129	1.04285	0.011194	0.0524437
1.48	1.11637	1.04691	0.00812564	0.0532695
1.5	1.11157	1.03981	0.00920342	0.0534643
1.52	1.10934	1.04348	0.0103234	0.0528909
1.53	1.10362	1.0398	0.0092302	0.0512697
1.55	1.10514	1.04305	0.00923271	0.0530397
1.57	1.10129	1.04194	0.00892543	0.0521873
1.58	1.09309	1.04145	0.00805754	0.0500437
1.6	1.08993	1.04035	0.00593726	0.0491996
1.62	1.0916	1.03924	0.00734065	0.0519574
1.63	1.08407	1.04179	0.00696328	0.0524287
1.65	1.08811	1.04104	0.0101908	0.0497289
1.67	1.08509	1.04108	0.00871479	0.0531192
1.68	1.08478	1.03908	0.00967371	0.0518095
1.7	1.07932	1.0322	0.00959243	0.0521637
1.72	1.07785	1.03874	0.00746647	0.0505296
1.73	1.07556	1.03596	0.00877113	0.0529444
1.75	1.07104	1.03451	0.00731122	0.051034
1.77	1.07133	1.04171	0.00715415	0.0542311
1.78	1.06279	1.0401	0.00658924	0.0594026
1.8	1.06762	1.04285	0.00900699	0.059438
1.82	1.06628	1.03983	0.00765681	0.0572934
1.83	1.06571	1.0418	0.00898541	0.0571822
1.85	1.06762	1.0404	0.00678128	0.055547
1.87	1.06342	1.03675	0.00524123	0.0538597
1.88	1.06181	1.03599	0.00800844	0.052471
1.9	1.05931	1.0334	0.00797308	0.0524405
1.92	1.05852	1.03492	0.00654826	0.0532394
1.93	1.05601	1.03246	0.00621747	0.0523019
1.95	1.05421	1.03355	0.00744311	0.0512787
1.97	1.05743	1.03093	0.00933713	0.0502752
1.98	1.05779	1.03333	0.00950847	0.0521588
2	1.05522	1.03021	0.00888278	0.0529729
2.02	1.05468	1.0302	0.00789572	0.0511886
2.03	1.05242	1.03135	0.00838711	0.0531856
2.05	1.05007	1.02944	0.0070906	0.0503098
2.07	1.05621	1.02992	0.00920771	0.0497187
2.08	1.05308	1.02701	0.00813806	0.0504005
2.1	1.05355	1.0276	0.00923569	0.0508397
2.12	1.05487	1.03001	0.00895019	0.051215
2.13	1.05844	1.02722	0.00990953	0.0511634
2.15	1.05173	1.02978	0.00863239	0.0514481
2.17	1.05437	1.02414	0.00959848	0.0508027
2.18	1.05417	1.02532	0.00993665	0.049504
2.2	1.054	1.02787	0.0123675	0.0509076
2.22	1.05077	1.02585	0.0100584	0.0505563
2.23	1.05552	1.02555	0.00954865	0.0498287
2.25	1.05525	1.02557	0.00942308	0.0508544
2.27	1.05799	1.02554	0.00945295	0.0515933
2.28	1.05251	1.0268	0.0102136	0.0498511
2.3	1.05182	1.02821	0.00781464	0.0491438
2.32	1.04727	1.02203	0.00956729	0.0489842
2.33	1.05093	1.02422	0.00952248	0.0510661
2.35	1.05185	1.02261	0.0066886	0.0493205
2.37	1.04969	1.02542	0.0091739	0.0496046
2.38	1.05025	1.01713	0.00841074	0.0491211
2.4	1.04949	1.02213	0.00916859	0.0496186
2.42	1.04945	1.02493	0.00911069	0.0504126
2.43	1.04745	1.0276	0.00849803	0.0524717
2.45	1.04615	1.02993	0.0084081	0.0562689
2.47	1.04359	1.02465	0.00385697	0.0514738
2.48	1.04895	1.02404	0.00723775	0.052574
2.5	1.04972	1.02486	0.00539475	0.0493067
2.52	1.04576	1.02369	0.00368343	0.0501406
2.53	1.04482	1.02653	0.00402186	0.0495002
2.55	1.05014	1.02734	0.00489529	0.0514845
2.57	1.04603	1.02459	0.00466977	0.0490262
2.58	1.04676	1.02705	0.00479367	0.0499306
2.6	1.04951	1.01997	0.00447151	0.0508933
2.62	1.04386	1.02647	0.00468342	0.0511932
2.63	1.04886	1.02519	0.00222192	0.0507636
2.65	1.0466	1.02544	0.00421889	0.0509865
2.67	1.0425	1.02393	0.00374846	0.0508411
2.68	1.04225	1.02413	0.00494841	0.0495832
2.7	1.04512	1.02237	0.00644526	0.0512648
2.72	1.0458	1.02404	0.00793972	0.0492962
2.73	1.04485	1.01883	0.00654295	0.0490276
2.75	1.039	1.02306	0.00723655	0.0503955
2.77	1.04029	1.02176	0.00855251	0.0488141
2.78	1.04005	1.01817	0.00573468	0.0501909
2.8	1.0373	1.01802	0.00596381	0.0479397
2.82	1.04086	1.01831	0.00650026	0.0475218
2.83	1.0425	1.02166	0.00640183	0.051232
2.85	1.03855	1.01544	0.00537841	0.048535
2.87	1.03982	1.0197	0.00618871	0.049114
2.88	1.03617	1.01655	0.00526792	0.0485728
2.9	1.03354	1.02222	0.00462944	0.0498175
2.92	1.03234	1.01907	0.00585587	0.0482711
2.93	1.03359	1.02067	0.00477714	0.0498198
2.95	1.03544	1.01951	0.00539146	0.0513886
2.97	1.03316	1.02311	0.00741796	0.0503626
2.98	1.03425	1.02004	0.00520303	0.0484594
3	1.03179	1.0164	0.00533076	0.051678
3.02	1.03193	1.01887	0.0042855	0.05174
3.03	1.0314	1.01757	0.00340807	0.0490029
3.05	1.03077	1.01967	0.00596519	0.0519375
3.07	1.02786	1.01478	0.0062324	0.0494731
3.08	1.02668	1.01802	0.00562948	0.0520587
3.1	1.02561	1.01772	0.0055831	0.0517334
3.12	1.02659	1.02039	0.0051996	0.0538343
3.13	1.02788	1.01708	0.00471903	0.0509394
3.15	1.03317	1.01864	0.003401	0.0504042
3.17	1.03696	1.02033	0.00624554	0.053521
3.18	1.03369	1.01886	0.00492815	0.0533276
3.2	1.03273	1.01825	0.00542948	0.0520891
3.22	1.03217	1.01624	0.00371641	0.0524068
3.23	1.02877	1.01622	0.00424311	0.0523066
3.25	1.03047	1.02075	0.00406397	0.0506064
3.27	1.02471	1.0163	0.00272811	0.0519112
3.28	1.02825	1.01963	0.00469605	0.0508797
3.3	1.02258	1.01614	0.00199797	0.0512989
3.32	1.02536	1.01631	0.00442921	0.0547835
3.33	1.02473	1.01959	0.00434941	0.051646
3.35	1.02174	1.01703	0.00457715	0.0534725
3.37	1.01926	1.01758	0.00415606	0.0500624
3.38	1.02083	1.01861	0.00542007	0.0501925
3.4	1.02057	1.02044	0.0019056	0.0511884
3.42	1.0181	1.01745	0.00536704	0.0523689
3.43	1.0179	1.01573	0.004021	0.0510066
3.45	1.01627	1.0175	0.00378568	0.0515176
3.47	1.01676	1.01442	0.00462359	0.0526215
3.48	1.01352	1.01479	0.00409274	0.0508766
3.5	1.01455	1.0208	0.00330432	0.052497
3.52	1.00891	1.01532	0.00393723	0.0507375
3.53	1.01386	1.01876	0.0042541	0.0518457
3.55	1.01112	1.01769	0.00132329	0.053019
3.57	1.00779	1.01787	0.0043061	0.0512065
3.58	1.00761	1.01821	0.00444623	0.0507578
3.6	1.00665	1.01547	0.0045392	0.0519919
3.62	1.00752	1.01924	0.00280809	0.0497989
3.63	1.00858	1.02053	0.00329281	0.0546671
3.65	1.01117	1.01871	0.00471112	0.0536238
3.67	1.00555	1.0166	0.00262955	0.0512612
3.68	1.00569	1.02165	0.00258242	0.0538182
3.7	1.00864	1.02361	0.00237372	0.0536411
3.72	1.00668	1.01968	0.0041971	0.0516701
3.73	1.00828	1.02482	0.0033739	0.0558354
3.75	1.01047	1.02286	0.00429277	0.0548716
3.77	1.01004	1.02425	0.00225648	0.0536289
3.78	1.01133	1.02046	0.00152221	0.0545286
3.8	1.004	1.02185	0.00343689	0.0548629
3.82	1.00503	1.02412	0.00194356	0.0517408
3.83	1.00375	1.01869	0.00430238	0.0534295
3.85	1.00437	1.0187	0.00269692	0.0514486
3.87	1.00558	1.02354	0.00257326	0.0520304
3.88	1.00262	1.01795	0.00231234	0.0523421
3.9	1.00288	1.01529	0.00294462	0.0506131
3.92	1.00036	1.01732	0.0031518	0.0509753
3.93	1.00143	1.01529	0.00445773	0.0508546
3.95	0.999861	1.01366	0.0040201	0.0520006
3.97	1.0002	1.01541	0.00392682	0.051402
3.98	0.999026	1.01431	0.00436078	0.0492697
4	1.00026	1.01105	0.00246589	0.0489914
4.02	0.997543	1.01624	0.0038011	0.0528141
4.03	0.996338	1.0112	0.0034142	0.049357
4.05	0.996639	1.01299	0.00205323	0.0514244
4.07	0.997045	1.01195	0.00151163	0.0493774
4.08	0.995878	1.01219	0.00680921	0.0509774
4.1	0.994815	1.01514	0.00459739	0.051061
4.12	0.997219	1.01118	0.00261407	0.0496025
4.13	0.999203	1.01465	0.00517669	0.0518094
4.15	0.997449	1.00935	0.00467257	0.0501251
4.17	0.998013	1.01427	0.00320108	0.0502394
4.18	0.996069	1.00797	0.00350595	0.049395
4.2	1.00006	1.01111	0.00374166	0.0516515
4.22	0.990985	1.01208	0.00406186	0.0493037
4.23	0.995138	1.01005	0.00348077	0.0487884
4.25	0.996969	1.00806	0.00359359	0.048642
4.27	0.990927	1.00856	0.00411919	0.0513922
4.28	0.998885	1.00872	0.00447813	0.0479938
4.3	0.990588	1.01311	0.00367297	0.0509206
4.32	0.993125	1.00912	0.00618989	0.0514594
4.33	0.994706	1.0039	0.0044095	0.0464067
4.35	0.99302	1.00842	0.00469129	0.0504492
4.37	0.99111	1.00701	0.00432691	0.0495598
4.38	0.997766	1.00651	0.00495645	0.0498341
4.4	1.00293	1.00541	0.0064658	0.0521466
4.42	1.00134	1.00647	0.00541681	0.0495003
4.43	0.994179	1.00751	0.00364716	0.0483597
4.45	0.996811	1.01031	0.00560669	0.0500143
4.47	0.992822	1.01104	0.00261033	0.0504919
4.48	0.989181	1.00771	0.0024743	0.0466861
4.5	0.992804	1.0122	0.00247461	0.0484443
4.52	0.995096	1.01088	0.00196783	0.0491178
4.53	0.997333	1.00906	0.00339226	0.0454864
4.55	0.99154	1.00923	0.00339937	0.0494099
4.57	0.993893	1.0098	0.00201389	0.0481185
4.58	0.990239	1.01183	0.00498338	0.0480225
4.6	0.989536	1.01208	0.00433821	0.0497364
4.62	0.99363	1.00889	0.0025771	0.0516279
4.63	0.99375	1.00969	0.0022443	0.0496406
4.65	0.992739	1.00923	0.002537	0.0486616
4.67	0.990868	1.00985	0.00313862	0.049365
4.68	0.991607	1.0055	0.00256893	0.0470201
4.7	0.989462	1.00612	0.00327775	0.0484571
4.72	0.988276	1.00448	0.00239478	0.0500881
4.73	0.99009	1.01014	0.00201595	0.0467025
4.75	0.992265	1.00667	0.00338132	0.0523824
4.77	0.990246	1.0085	0.00462681	0.0481955
4.78	0.98835	1.00585	0.00365692	0.0498923
4.8	0.987065	1.00401	0.00401982	0.0483629
4.82	0.988742	1.01066	0.00463878	0.0516899
4.83	0.990863	1.00701	0.00440281	0.0507908
4.85	0.989942	1.00535	0.00510218	0.0520081
4.87	0.984876	1.006	0.00181837	0.0481718
4.88	0.985285	1.00869	0.00464289	0.0502211
4.9	0.987898	1.01016	0.00289162	0.0515594
4.92	0.982731	1.00946	0.00505364	0.0509047
4.93	0.983163	1.00571	0.00285929	0.0504651
4.95	0.987395	1.01093	0.00251832	0.0496891
4.97	0.985331	1.00467	0.00516909	0.0506001
4.98	0.98565	1.00309	0.0040699	0.0502007
5	0.983481	1.00413	0.00263625	0.0507934
5.02	0.985364	1.00706	0.00236215	0.0493597
5.03	0.986216	1.00382	0.00338332	0.0527758
5.05	0.984618	1.00568	0.00411629	0.0500292
5.07	0.981316	1.00358	0.00388768	0.0494125
5.08	0.98288	1.00629	0.00248151	0.049996
5.1	0.984129	1.00341	0.00136075	0.0483303
5.12	0.980383	1.00694	0.00412884	0.0482344
5.13	0.981642	1.00473	0.00312989	0.051065
5.15	0.984384	1.00796	0.00435905	0.0518009
5.17	0.983782	1.00425	0.0030037	0.0500992
5.18	0.982973	1.00492	0.00294539	0.0504527
5.2	0.986468	1.00412	0.00626188	0.0524832
5.22	0.986501	1.00465	0.0076282	0.0514299
5.23	0.987234	1.00473	0.00566185	0.0496047
5.25	0.987389	1.00228	0.00938378	0.0496558
5.27	0.98052	1.00726	0.00671838	0.0495514
5.28	0.985253	1.01133	0.00715588	0.0504472
5.3	0.984427	1.00316	0.0054153	0.0509392
5.32	0.98269	1.00666	0.00565388	0.050486
5.33	0.988608	1.0041	0.00472574	0.0508773
5.35	0.982424	0.999448	0.00466488	0.0509422
5.37	0.983108	1.00425	0.00533214	0.0503279
5.38	0.984374	1.00386	0.00328823	0.0511836
5.4	0.984965	1.00438	0.00589999	0.051642
5.42	0.98343	1.00464	0.00441069	0.0512286
5.43	0.98469	1.00414	0.00286702	0.0529109
5.45	0.980883	0.999585	0.0046964	0.0514789
5.47	0.980498	1.00707	0.00493656	0.0542772
5.48	0.978696	1.003	0.00492756	0.0538775
5.5	0.979731	1.00355	0.00480764	0.0525082
5.52	0.982483	1.00455	0.00305642	0.0550967
5.53	0.980862	1.00651	0.00602507	0.0554482
5.55	0.983386	1.00357	0.00448106	0.0543855
5.57	0.984356	1.00156	0.00422271	0.0519939
5.58	0.984753	1.00515	0.00723991	0.0503959
5.6	0.984823	1.00422	0.00935694	0.0533856
5.62	0.985782	1.00335	0.00370601	0.0545309
5.63	0.985209	0.998594	0.00848918	0.0507193
5.65	0.986379	1.00221	0.00736161	0.049379
5.67	0.982904	1.00331	0.00745477	0.0506495
5.68	0.981564	0.997551	0.00570292	0.0519435
5.7	0.982034	1.00069	0.00422198	0.0520822
5.72	0.981067	1.00053	0.0046462	0.0503756
5.73	0.981466	0.998589	0.0041083	0.0510089
5.75	0.979269	0.999238	0.00394839	0.0523968
5.77	0.98117	0.998958	0.00603105	0.049142
5.78	0.977964	0.997551	0.00395573	0.0504071
5.8	0.976137	0.998316	0.00444761	0.0513127
5.82	0.974372	1.00097	0.00163905	0.0509543
5.83	0.976579	0.997717	0.00372808	0.0509811
5.85	0.976071	0.998787	0.00486999	0.0499057
5.87	0.977167	0.998425	0.00301474	0.0486888
5.88	0.9763	0.998196	0.00297379	0.0492733
5.9	0.978821	0.997788	0.00267532	0.0494879
5.92	0.977666	0.999971	0.0030693	0.0500167
5.93	0.976982	0.999658	0.00419553	0.0502123
5.95	0.97488	0.999722	0.00288062	0.0506142
5.97	0.976083	0.997757	0.00206762	0.0485475
5.98	0.978656	1.00161	0.00179078	0.0523621
6	0.972924	0.998431	0.00353507	0.0503261
6.02	0.974402	0.998451	0.00232875	0.0505277
6.03	0.974568	0.99802	0.00281687	0.0525926
6.05	0.974235	0.998003	0.00285389	0.0519219
6.07	0.97308	1.00198	0.00369413	0.0518547
6.08	0.9737	1.00255	0.00493903	0.0553662
6.1	0.974556	0.999866	0.0032496	0.0522737
6.12	0.973528	1.00416	0.00262408	0.0557524
6.13	0.977595	1.00314	0.00531152	0.0535309
6.15	0.973022	1.00083	0.00448571	0.0521789
6.17	0.97192	0.998287	0.00200748	0.0546332
6.18	0.969496	0.997036	0.00336214	0.0531614
6.2	0.970191	0.999152	0.00319904	0.0541546
6.22	0.970829	0.996384	0.00295389	0.0522811
6.23	0.971972	0.999941	0.00384836	0.0538431
6.25	0.970082	1.00847	0.00289998	0.0551131
6.27	0.975327	1.00629	0.00341424	0.0547013
6.28	0.970545	1.00529	0.0036176	0.0517523
6.3	0.972086	1.00388	0.00279486	0.0518144
6.32	0.971042	1.00139	0.00265071	0.0533524
6.33	0.973034	0.999468	0.003505	0.0513285
6.35	0.968194	0.998478	0.00315198	0.0551427
6.37	0.97212	0.996978	0.00430007	0.0534183
6.38	0.97311	1.00061	0.00395957	0.0546651
6.4	0.972148	0.999933	0.00704861	0.0554124
6.42	0.974108	0.998758	0.00443501	0.0525083
6.43	0.972364	0.996912	0.00249711	0.0527896
6.45	0.969687	0.996586	0.00191082	0.0534952
6.47	0.973363	0.994348	0.0055006	0.0517199
6.48	0.971207	1.00053	0.00260412	0.0529386
6.5	0.970846	0.996033	0.00318678	0.0512555
6.52	0.974088	0.991852	0.00313185	0.0496466
6.53	0.970815	0.99233	0.00454775	0.0511109
6.55	0.971781	1.00023	0.00436735	0.0531894
6.57	0.970745	0.994064	0.00401342	0.0520001
6.58	0.969712	0.99057	0.00393225	0.0536274
6.6	0.968969	0.996144	0.00388404	0.0523848
6.62	0.970787	0.997233	0.00497517	0.0508537
6.63	0.964486	0.991897	0.00176391	0.0525322
6.65	0.967737	0.996247	0.00320542	0.0529889
6.67	0.97215	0.993542	0.00243482	0.0530194
6.68	0.9697	0.995719	0.00426746	0.049096
6.7	0.972347	0.994958	0.00377955	0.0492414
6.72	0.969029	0.994544	0.00281441	0.0491848
6.73	0.969104	0.996564	0.00601959	0.0506676
6.75	0.969122	0.993281	0.00295933	0.0514916
6.77	0.972119	0.996392	0.00316653	0.0511907
6.78	0.969748	0.990485	0.00545109	0.0517626
6.8	0.970756	0.993854	0.00520448	0.0516004
6.82	0.970518	0.990851	0.00572987	0.0531253
6.83	0.968867	0.991792	0.00325845	0.0504386
6.85	0.969611	0.993622	0.00418417	0.0492587
6.87	0.968906	0.991227	0.00422552	0.0522931
6.88	0.967576	0.989433	0.00566042	0.0515548
6.9	0.966063	0.988366	0.0037031	0.050681
6.92	0.966807	0.988718	0.0048019	0.0487205
6.93	0.964195	0.990421	0.0046458	0.0515547
6.95	0.970416	0.989305	0.00441883	0.0507177
6.97	0.965872	0.989552	0.00344384	0.0482451
6.98	0.968505	0.989521	0.00292526	0.0497534
7	0.970189	0.992443	0.00414303	0.0506719
7.02	0.970128	0.99018	0.00439236	0.048864
7.03	0.970173	0.990286	0.0027025	0.0504277
7.05	0.969945	0.992536	0.00381662	0.0493645
7.07	0.970663	0.985982	0.00275361	0.0492529
7.08	0.971496	0.985129	0.00544317	0.05202
7.1	0.966668	0.989212	0.00321139	0.0522604
7.12	0.971565	0.98523	0.00520105	0.0489403
7.13	0.964909	0.988801	0.00678625	0.0488499
7.15	0.964847	0.987922	0.00369919	0.0527223
7.17	0.970134	0.989674	0.00473652	0.0501499
7.18	0.967883	0.988796	0.00218991	0.0536014
7.2	0.963702	0.98842	0.00370857	0.0506159
7.22	0.966888	0.98982	0.00640575	0.0496889
7.23	0.961374	0.991892	0.00458626	0.0499894
7.25	0.964343	0.987957	0.00621291	0.0496295
7.27	0.962423	0.992364	0.00411043	0.0517505
7.28	0.959939	0.989305	0.00531174	0.0514182
7.3	0.961383	0.989393	0.00492907	0.0519315
7.32	0.962338	0.988169	0.00528549	0.0536172
7.33	0.958181	0.988214	0.00190084	0.0530824
7.35	0.962297	0.986902	0.00335116	0.0542656
7.37	0.962203	0.99167	0.0065116	0.0537198
7.38	0.962443	0.994464	0.00395004	0.0555644
7.4	0.959371	0.992404	0.00486438	0.0516045
7.42	0.960769	0.988976	0.00323249	0.0542508
7.43	0.96238	0.992053	0.00233646	0.053933
7.45	0.961969	0.988204	0.0020062	0.0534199
7.47	0.966504	0.986255	0.00264927	0.0501872
7.48	0.964431	0.987353	0.00368163	0.0502782
7.5	0.963201	0.986332	0.00158677	0.0518758
7.52	0.961531	0.985374	0.00348238	0.0513217
7.53	0.962093	0.986503	0.00437432	0.0507096
7.55	0.961436	0.987907	0.00271509	0.0495413
7.57	0.957936	0.985947	0.001926	0.0490371
7.58	0.958553	0.983326	0.00280544	0.0503691
7.6	0.958132	0.983774	0.00168739	0.0527005
7.62	0.957653	0.98319	0.00445599	0.0493198
7.63	0.955915	0.983115	0.00228183	0.0494338
7.65	0.954922	0.984225	0.00347576	0.0482424
7.67	0.95727	0.986979	0.00377266	0.0483263
7.68	0.954794	0.984929	0.0021041	0.0497373
7.7	0.958186	0.983464	0.00309913	0.0487169
7.72	0.955544	0.982657	0.00455683	0.0479346
7.73	0.956206	0.981498	0.00259413	0.0484682
7.75	0.953964	0.988208	0.00312594	0.0499112
7.77	0.954176	0.979197	0.0045958	0.048101
7.78	0.957049	0.982676	0.00524196	0.0491334
7.8	0.953136	0.984023	0.00229299	0.0482444
7.82	0.951716	0.982345	0.00472206	0.0497556
7.83	0.954338	0.982826	0.00596657	0.0495547
7.85	0.956095	0.981987	0.00672346	0.0503831
7.87	0.95513	0.981593	0.00457526	0.0492004
7.88	0.957886	0.985098	0.00544146	0.0514772
7.9	0.952841	0.982713	0.00616253	0.051155
7.92	0.953457	0.982161	0.00550925	0.0507571
7.93	0.957766	0.985393	0.00469945	0.0527689
7.95	0.95285	0.986369	0.00533655	0.0531351
7.97	0.953158	0.987243	0.00509047	0.0495338
7.98	0.956895	0.991674	0.00518179	0.0499239
8	0.952231	0.988825	0.00534202	0.0519741
8.02	0.952215	0.986898	0.00633383	0.0501794
8.03	0.955367	0.987236	0.00374834	0.0501379
8.05	0.95642	0.985536	0.0052288	0.0508273
8.07	0.953116	0.986106	0.00590403	0.0510261
8.08	0.953844	0.983869	0.0056003	0.0512388
8.1	0.955804	0.980629	0.00536311	0.0494767
8.12	0.953825	0.9809	0.00486407	0.0501098
8.13	0.955149	0.982699	0.00594483	0.0483449
8.15	0.954567	0.981289	0.0060237	0.0512562
8.17	0.959039	0.979831	0.00728714	0.0495933
8.18	0.953108	0.98077	0.00623382	0.047539
8.2	0.954371	0.981108	0.00869071	0.0503805
8.22	0.95232	0.981279	0.00953663	0.0503808
8.23	0.956126	0.979079	0.00874107	0.0492414
8.25	0.95853	0.983518	0.00834904	0.0482262
8.27	0.958091	0.982499	0.00835407	0.0478567
8.28	0.957501	0.982378	0.00841845	0.0507567
8.3	0.956957	0.979963	0.0105045	0.0493359
8.32	0.956758	0.977012	0.00893687	0.0491873
8.33	0.954497	0.981087	0.00639637	0.0488178
8.35	0.9565	0.97979	0.00798941	0.049935
8.37	0.955416	0.98101	0.00721792	0.0519482
8.38	0.951033	0.977687	0.00871798	0.0518449
8.4	0.950862	0.976463	0.00733784	0.0458097
8.42	0.954586	0.978673	0.00666662	0.0496348
8.43	0.95209	0.977037	0.00780818	0.0505845
8.45	0.950259	0.979472	0.00632325	0.0518513
8.47	0.948351	0.978869	0.0037268	0.0469659
8.48	0.950223	0.977064	0.007313	0.0489375
8.5	0.951341	0.979476	0.00491619	0.0490551
8.52	0.948256	0.980159	0.00644677	0.0492007
8.53	0.951989	0.979807	0.00509245	0.0505796
8.55	0.943727	0.977845	0.00376733	0.0492442
8.57	0.949559	0.979075	0.0053879	0.0492702
8.58	0.948995	0.97744	0.00429812	0.0492769
8.6	0.946285	0.981757	0.00412982	0.0470289
8.62	0.949429	0.977124	0.00467984	0.0487535
8.63	0.950628	0.979642	0.00607322	0.0493303
8.65	0.947536	0.979661	0.00391088	0.0482633
8.67	0.945568	0.980047	0.00555669	0.048218
8.68	0.951285	0.974383	0.00478329	0.0475148
8.7	0.946353	0.976455	0.00477456	0.0481629
8.72	0.949863	0.977624	0.00508122	0.0494205
8.73	0.949774	0.976907	0.00341928	0.0483882
8.75	0.94841	0.978012	0.00542512	0.0485445
8.77	0.946616	0.979018	0.00605126	0.0476431
8.78	0.948617	0.980723	0.00517278	0.0496028
8.8	0.947508	0.972602	0.00574217	0.0486822
8.82	0.948399	0.979263	0.00472661	0.0478305
