# Supplementary material for: Coral anthozoan-specific opsins employ a novel chloride counterion for spectral tuning
Source: eLife. 2025 Sep 1;14:RP105451. doi: 10.7554/eLife.105451 (PMC12401545; doi:10.7554/eLife.105451)
Supplement: Figure 6—source data 1. [file elife-105451-fig6-data1.xlsx]

## Sheet: Sheet1
wavelength [nm]	A_Antho2c_WT_0Cl_dark_pH4_8	A_Dcurve1_Antho2c_WT_0Cl_dark_pH6_5	A_Antho2c_WT_0Cl_dark_pH7_1	B_Antho2c_WT_0_93Cl_dark_pH4_8	B_Dcurve2_Antho2c_WT_0_93Cl_dark_pH6_5	B_Antho2c_WT_0_93Cl_dark_pH7_2	C_Antho2c_WT_9_3Cl_dark_pH4_8	C_Dcurve3_Antho2c_WT_9_3Cl_dark_pH6_4	C_Antho2c_WT_9_3Cl_dark_pH7_2	E_curve1_Antho2e_WT_0Cl_dark	E_curve1_Antho2e_WT_140Cl_dark	E_curve1_Antho2e_WT_1000Cl_dark	F_curve1_Antho2e_R113A_0Cl_dark	F_curve1_Antho2e_R113A_140Cl_dark	F_curve1_Antho2e_R113A_1000Cl_dark
750	-0.000108053	8.38767e-06	-0.000101505	-6.56807e-05	-3.13863e-05	2.47753e-05	-0.000136418	-0.000104038	-0.000183298	-0.000216628	-0.000241691	0.000238	-0.000290762	-0.000311067	-0.000118538
749	-0.000146621	7.02387e-05	1.9485e-05	0.00010146	0.000109026	1.0956e-05	-7.66806e-05	5.53627e-05	1.9066e-05	-0.000358466	-0.00036761	0.000310135	-0.000439749	-0.000240426	-8.38124e-06
748	-0.000162559	1.96733e-05	-1.3083e-05	4.53703e-05	4.687e-06	-4.72494e-05	-8.09194e-05	-3.86827e-05	-5.546e-06	-0.00024696	-0.000301333	0.000288171	-0.000469567	6.5321e-05	-7.59686e-05
747	-0.000144423	-2.25377e-05	-6.84007e-05	5.59466e-06	-1.50723e-05	-5.30947e-05	-0.000128735	-4.98877e-05	-0.000107368	-0.000218311	-0.000402858	0.000244612	-0.000417671	-0.000145721	-0.000220028
746	-0.000150799	-3.9347e-05	-7.4123e-05	-0.000175682	-8.47956e-06	5.90274e-05	-0.000219863	-6.49343e-05	-0.000160689	-0.000286501	-0.0003145	0.000464697	-0.000400571	-0.000193075	-0.00015716
745	-0.000308772	-4.36234e-05	-0.000111166	-0.000154616	-0.000106166	3.02823e-05	-0.000229684	-0.000120689	-0.000159061	-0.000377591	-0.000158639	0.000222516	-0.000475051	-8.53483e-06	-0.000253624
744	-0.000196534	0.000151454	-9.02387e-05	0.000142047	-7.3815e-05	0.0002169	-9.36303e-05	1.58276e-05	6.51303e-06	-0.000289391	-0.000147275	0.000307068	-0.000624631	0.000116216	5.21472e-05
743	-4.10148e-05	0.000168303	-0.000181273	7.01977e-05	7.24035e-06	0.000219417	-0.00010286	-1.7951e-05	-1.6533e-05	5.7027e-05	-0.000352045	0.000264257	-0.000223566	-0.000193033	-5.14501e-05
742	-5.55275e-05	9.86503e-05	-0.000284444	0.000100767	-0.000124381	8.38523e-05	-8.08778e-05	-8.85127e-05	-1.61743e-05	0.000104248	-0.000353849	0.000259394	-0.000190405	-0.000272295	6.49278e-05
741	-5.40029e-05	5.26378e-05	-0.000228157	1.95525e-05	-9.51782e-05	-9.67559e-06	-7.50389e-05	-4.50785e-05	-7.51355e-05	6.68471e-05	-0.000318477	0.000430811	-0.00015978	-8.40696e-05	9.08286e-06
740	-0.000169033	4.26006e-05	-8.42584e-05	0.000164578	-9.90191e-05	3.42964e-06	1.52029e-05	-0.00010101	-3.27671e-05	-0.000184989	-0.00022074	0.000445204	-0.000165142	-6.2894e-05	8.00479e-05
739	-7.13664e-05	0.000127279	-5.56009e-06	0.000266877	5.24609e-05	0.00012076	8.34699e-05	9.13247e-07	6.13766e-05	-0.000221635	-0.000252483	0.000131743	-0.000213035	-2.71324e-05	-6.43314e-05
738	-9.0769e-05	-2.32703e-05	-6.90746e-05	0.000199879	0.00010461	3.596e-05	4.77501e-05	8.70967e-05	7.45833e-05	-0.000260405	-6.53891e-05	5.88023e-05	-0.000528961	-3.23788e-05	-0.000130302
737	-9.35014e-05	1.82671e-05	-0.000203567	0.000114923	2.91178e-05	-4.75102e-05	-0.00011614	6.10625e-05	3.40932e-05	-7.69473e-05	8.29785e-05	-3.3268e-05	-0.000300661	8.39795e-05	-0.000194191
736	-0.000251079	-0.000148042	-0.000230018	-6.24933e-05	-0.000118461	-0.000191506	-0.000169676	-4.69183e-05	1.61177e-05	5.69293e-05	-3.97039e-05	0.00015439	-7.0284e-05	4.30762e-05	-0.000170295
735	-0.000225677	-0.000196886	-0.00022984	-0.000159923	2.83841e-05	-0.000132365	-0.000167795	-5.27189e-05	5.11381e-05	-0.000213421	-0.000159599	0.000375014	-0.000274235	-0.000135029	-0.000106541
734	-0.000282737	-1.57076e-05	-0.000170899	-5.78602e-05	4.83031e-05	-0.000133791	-4.70843e-05	-1.57142e-05	-1.74609e-05	-0.000178673	-0.000264221	0.000340585	-0.00029005	-0.000259924	-0.000172332
733	-0.000129772	0.000212234	-8.62197e-05	4.40666e-06	8.17417e-05	-0.000113698	-6.44077e-05	6.5222e-05	0.000101212	-0.00022833	-0.000267009	-0.000109596	-0.000337013	-0.000219496	-0.000279991
732	-7.30692e-05	0.000235478	-6.62233e-05	3.24613e-05	2.4287e-05	-8.64701e-06	2.08831e-05	3.6573e-05	0.000167833	-0.000150956	-0.000387068	-0.000352341	-0.000287063	-0.00031723	-0.000441309
731	-0.000312178	5.19645e-05	-0.000197864	6.8515e-05	-0.000134518	-7.87542e-05	-1.20608e-05	-4.04441e-05	-7.26209e-05	-0.000355578	-0.000235281	3.6571e-05	-0.000466378	-0.00016149	-0.000365016
730	-0.000231755	-7.78753e-05	-0.000281514	-2.03417e-05	-8.47962e-06	-0.000105183	-0.000147327	-8.05766e-05	-0.000167837	-0.000434311	-0.000398742	8.11297e-05	-0.000540288	-0.000121737	-9.05891e-05
729	-8.60966e-05	5.86173e-05	-7.34201e-06	6.10901e-06	0.000128408	4.5387e-05	-0.000167993	2.96243e-05	4.71804e-05	-0.000346447	-0.00024294	-0.000177954	-0.000466064	2.95368e-05	-0.000171653
728	-0.000208413	2.11786e-05	-0.000218772	-0.000111317	-3.24575e-05	-6.31328e-05	-0.000299876	2.96039e-05	-7.23428e-05	-0.000175071	-0.000239973	-0.000297123	-0.000357844	8.87526e-05	-0.000356529
727	-0.000244308	1.44665e-05	-0.000372628	-0.000172456	-0.000234026	-0.000207523	-0.000336543	-6.66359e-05	-9.79625e-05	-9.00754e-05	-0.000253386	-9.85635e-05	-0.000337269	0.000110217	-0.000231608
726	-0.0003887	-0.00020629	-0.00041563	-0.000204251	-0.00030742	-0.0001747	-0.000291677	-0.000120191	-0.000267523	-0.00030497	-0.00036429	7.18939e-06	-0.000425693	0.000114228	-0.000164345
725	-0.000185605	9.7739e-05	-0.000320973	3.7549e-05	-9.68213e-05	-1.26627e-05	-0.000175953	8.62677e-05	-0.000152429	-0.000504008	-0.000307396	0.000223296	-0.000636511	0.000202343	-0.000189661
724	-3.37292e-05	0.000240369	-0.00010289	0.000251989	-1.2459e-05	2.98053e-05	-2.84146e-05	0.000334842	-3.33014e-05	-0.000384263	-0.000383914	0.000255407	-0.000704043	0.000124121	-9.53779e-05
723	-0.000197959	8.6239e-05	-0.000192241	4.7845e-05	-0.00012838	-1.6309e-05	-0.000161659	0.000266654	-0.000143042	-0.000225062	-0.000303052	-1.94272e-05	-0.000393162	0.000109356	-0.000179649
722	-7.77614e-05	9.92834e-05	-0.000245619	-1.25014e-05	-5.53036e-05	-0.000106529	-2.64356e-05	0.000255884	-4.66898e-06	-0.000217262	-0.000165357	6.71528e-05	-0.000262652	7.18925e-05	-0.000188337
721	-0.000111083	0.000165747	-8.56657e-05	-2.13122e-05	0.000107106	7.1341e-05	-3.78563e-06	7.5281e-05	0.000103128	-0.000113118	-0.000124459	-1.77886e-05	-0.000321198	1.3749e-05	-0.000459531
720	-0.000270521	5.74287e-05	-0.000124748	-9.26863e-05	0.00012728	7.56588e-05	-7.7138e-05	-6.64983e-05	9.84987e-05	-0.00020166	-0.000180183	-0.000129063	-0.000348853	-5.87522e-06	-0.000549205
719	-0.000265849	-0.000139786	-0.000445942	-0.000264519	-0.000137349	-0.00024185	-0.000289457	-0.000292046	-2.78371e-05	-0.000301882	-4.06849e-05	3.86391e-05	-0.000215745	0.000180589	-0.000435972
718	-0.000284361	-0.000156516	-0.000426995	-0.000126305	-6.70244e-05	-0.000220907	-0.000257941	-0.000125457	-2.57409e-06	-0.000448173	-0.000214821	-3.24311e-05	-0.00039477	-0.000151231	-0.00031853
717	-0.000251515	-1.73308e-05	-0.000312103	-9.22305e-05	-0.000216405	-2.88794e-05	-0.000158769	5.88656e-06	1.45105e-05	-0.000267869	-0.000365893	7.44704e-07	-0.000361702	-0.000126409	-0.000127857
716	-0.000350587	-0.000214625	-0.000436637	-0.000268221	-0.000385209	-0.000119024	-0.000315574	-0.000201841	-0.000228298	-0.000115498	-0.000188315	-0.000100049	-0.000250018	9.6489e-05	-3.8858e-05
715	-0.00014284	-0.000172612	-0.00021016	-8.60933e-05	-0.000271307	3.41593e-05	-0.000177594	8.81925e-06	-2.53746e-06	-6.22193e-05	-0.000235381	-9.51546e-05	-0.000222733	-8.93322e-05	1.40648e-06
714	-0.000207007	-1.98848e-05	-0.000120927	7.09696e-05	-0.000194488	0.000169763	-1.81571e-05	-1.30405e-05	2.35196e-05	-1.72353e-05	-0.000326463	-9.31309e-05	-0.000246909	1.37483e-05	-0.000100745
713	-0.000254227	7.6515e-05	-0.000254508	4.78255e-05	-0.000157425	0.000134062	3.83899e-06	-7.4e-05	-5.05643e-05	-5.66365e-05	-0.000325156	4.1579e-05	-0.000394013	3.88385e-05	-0.000217947
712	-0.000105519	0.000194218	-0.000157633	-3.19044e-05	4.20469e-05	0.000124108	0.000130274	5.87843e-05	-6.48391e-05	0.000128185	-0.000453877	5.45126e-05	-0.000103449	-1.12e-05	-0.000153462
711	-6.62187e-05	8.78596e-05	-0.000107741	-6.27507e-05	5.3332e-05	0.000149014	2.40739e-05	4.1009e-05	-5.83461e-05	0.000166734	-0.000332385	9.0865e-05	5.10707e-06	-1.13407e-05	-7.12804e-05
710	-0.000150165	-0.000165207	-0.000147734	-6.46313e-05	-4.5404e-05	0.000141883	-0.00014113	-0.000140843	-3.16366e-05	8.49267e-05	-0.000306393	-6.48883e-05	-0.000160803	-3.79678e-05	-0.00021902
709	-0.000166974	-3.20808e-05	-3.4367e-05	5.07757e-05	-1.27753e-05	3.78827e-05	-9.39874e-05	-0.000132507	6.4146e-05	-2.06828e-05	-0.000353845	-6.79114e-05	-0.000121603	-4.67312e-05	6.99967e-05
708	-0.00023338	-5.73442e-05	-0.000121165	1.1613e-05	-1.1905e-05	-2.62477e-05	-0.000150001	-8.26147e-05	-4.54176e-05	-8.31027e-05	-0.000467256	-8.61772e-05	-0.000155776	-9.87958e-05	-4.49395e-05
707	-0.000173825	-2.95699e-06	-0.000163534	5.7566e-05	0.000106155	0.00016398	-5.4067e-06	2.804e-05	0.000129283	-8.92244e-05	-0.000339489	-8.71369e-05	-0.000361661	4.37915e-05	-9.24906e-05
706	-0.000171805	4.59257e-05	-2.97543e-05	5.9922e-05	0.000176163	0.000147525	-7.6782e-05	0.000133786	0.000152391	-4.77057e-05	-0.000336868	-0.00031425	-0.000298209	2.68778e-05	-0.000276845
705	-0.000218906	-0.000112622	-0.000162465	-8.51823e-05	9.41187e-05	8.29434e-05	-0.000152157	5.55167e-05	2.667e-05	-0.00023348	-0.000266782	-0.000261362	-0.00038449	1.19052e-05	-0.000435035
704	-0.000232508	-0.000125234	-6.5293e-05	-2.1074e-06	9.14224e-05	0.000123092	-3.2711e-05	0.000125746	-1.43943e-05	-0.000303367	-0.000355858	3.05469e-05	-0.000326781	-0.000132367	-0.000350741
703	-0.000154482	6.10323e-05	-2.76951e-05	0.000209303	3.76316e-05	0.000156062	6.25558e-06	0.000209456	6.52156e-05	-0.000252859	-0.000510041	0.00014455	-0.000329032	-0.000179657	-0.000239867
702	-0.000161628	0.000154423	-0.000111423	0.00015458	1.0626e-05	8.70243e-06	-0.000145048	8.99723e-05	5.06857e-05	-0.000138837	-0.000327286	-1.56769e-05	-0.000333907	-7.42814e-05	-7.36725e-05
701	-0.000266601	4.87767e-05	-0.00018159	-6.15233e-05	-2.88523e-05	-0.000174401	-0.000182685	-5.2799e-05	-0.000102358	-0.000280361	-0.000168982	-6.523e-05	-0.000439354	8.49228e-05	-0.000279474
700	-0.000261592	-9.11432e-06	-0.000296977	-0.000104644	-1.81413e-05	-0.000237459	-0.000213609	-0.000135179	-0.000111149	-0.000518083	-0.000123245	-6.91558e-05	-0.00071915	0.000137967	-0.000344761
699	-0.000192911	-5.69679e-05	-0.000281435	-2.67962e-05	-6.50049e-05	-4.73333e-05	-0.000143146	-0.000137991	-7.30999e-05	-0.000534951	-0.000268624	-9.1435e-05	-0.000665611	4.07223e-05	-0.000243893
698	-7.95234e-05	-0.000107593	-0.00021895	5.8675e-05	-0.000176135	-5.18054e-05	-0.000183575	-7.4594e-05	-3.08453e-05	-0.000249297	-0.000223894	0.000139349	-0.000465627	0.0001029	-0.000139638
697	-5.95266e-05	-1.13514e-05	-0.000147754	4.59639e-05	-6.19558e-05	-1.2091e-05	-8.4841e-05	8.55558e-07	-1.20944e-05	-0.00016408	-0.000139181	0.000130389	-0.00037277	7.86801e-06	-3.63609e-05
696	-0.000135752	9.63537e-05	-8.97833e-05	8.41557e-05	5.78857e-05	2.3332e-05	-1.86714e-05	0.000163585	-4.95946e-05	-0.00028335	-4.96346e-05	-0.000162137	-0.000377857	5.54284e-05	-0.000231143
695	-6.29125e-05	0.000147414	-0.000101227	0.000142423	4.961e-05	-3.00456e-05	-3.62557e-05	9.4803e-05	-7.9569e-05	-0.000287446	-0.000126956	1.71614e-05	-0.000408923	0.000305052	-0.000284364
694	-3.39783e-06	4.7391e-05	-5.6898e-05	0.000264759	9.2256e-05	0.000205418	-1.21583e-05	0.000168095	5.82884e-05	-0.000207162	-0.000406851	0.000113661	-0.000473549	9.32741e-05	-0.000171991
693	-0.000147512	-0.000101079	-7.64788e-05	0.000104885	0.00013908	0.000184057	5.57706e-05	9.18106e-05	4.71051e-06	-9.24706e-05	-0.00029396	0.000188425	-0.000374197	-0.000146294	-1.25964e-05
692	-0.0002805	-0.00014228	-1.946e-05	5.29929e-05	6.53107e-05	2.6361e-05	-4.01157e-05	-0.000161016	-0.000159836	-0.000145964	-0.000175821	6.5256e-05	-0.000123388	-3.05331e-05	0.000119186
691	-8.27111e-05	-4.99196e-05	0.000153342	0.000160143	6.22411e-05	8.49987e-05	0.000134889	-8.00206e-05	2.33255e-05	-9.46278e-05	-0.000420718	7.32429e-05	-0.000121824	-0.000320795	3.27946e-05
690	3.02012e-05	0.000254604	0.000137505	0.000258226	0.000185132	0.000319381	0.000184064	0.000246678	0.000361878	-7.14065e-05	-0.000241527	0.000150719	-0.000140333	-0.000268895	5.50126e-05
689	-2.35528e-05	0.000163946	0.000171163	3.80443e-05	0.000201941	0.000203735	3.30617e-05	0.000256537	0.000355208	-0.000142957	-8.10966e-05	1.56281e-05	-0.00040532	-2.97745e-05	6.23251e-05
688	-0.00010144	0.000155492	8.24453e-05	-9.28247e-05	-1.55077e-05	0.000121632	-9.60077e-05	7.5892e-05	0.000122912	-8.66494e-05	8.55832e-05	0.000232585	-0.000421199	-7.0533e-05	0.000204181
687	-0.000217302	5.4499e-05	-0.000107087	-0.000121711	-3.95827e-05	2.70346e-05	-0.000156315	-4.3215e-05	-8.38654e-05	-5.03834e-06	0.000267991	0.000117666	-0.000216325	0.000134896	0.000266611
686	-0.000338688	-0.000215634	-0.000227741	-0.000368343	-0.000285186	-6.16462e-05	-0.000287973	-0.000257236	2.50237e-05	8.80749e-05	4.6522e-05	0.000148923	-7.17717e-05	0.000157078	0.000259478
685	-0.000318593	-0.000105652	-0.000274743	-0.000401565	-0.00037131	4.8595e-05	-0.000185198	-0.000258069	3.74783e-05	9.83498e-05	-0.000226184	0.000141093	-0.000156174	8.53718e-05	6.36306e-05
684	-0.000252623	6.06965e-05	-0.000252311	-0.000220229	-0.000200883	0.000134695	-3.48081e-05	6.28253e-05	6.06053e-05	0.000117931	-0.000147149	0.000120917	7.08615e-05	-2.16686e-05	-0.000134412
683	-0.000128149	0.000214313	-0.000156248	-0.000149726	-0.00015992	0.000156375	7.12915e-05	-2.56932e-05	0.000197138	0.000117554	-0.000110402	5.68786e-05	6.43043e-05	-0.000141663	-0.000134517
682	-0.000352033	6.32897e-05	-0.000192638	-0.000233633	-0.000305321	0.000111814	-3.52861e-05	-0.000249676	0.000122474	-4.03223e-05	-9.84421e-05	0.000238447	-0.000194639	-9.22411e-05	-6.65658e-05
681	-0.000395708	-3.84957e-05	-0.000283653	-0.000352365	-0.000127252	3.9366e-05	-9.05206e-05	-0.000185647	6.6066e-05	-0.000183028	-1.74834e-05	5.68216e-05	-0.000296308	-7.82548e-05	-4.02603e-05
680	-0.000466429	3.80858e-05	-0.000350195	-0.00022904	-0.000231947	-0.000183762	-8.76721e-05	-0.000281512	1.04945e-05	-1.27791e-05	5.32605e-05	0.000135126	0.000139677	-0.000108034	0.000331302
679	-0.000488069	6.23387e-05	-0.000307015	-3.75666e-05	-0.000351373	-0.000264404	-0.000275264	-0.000309369	-9.44603e-05	-0.000123379	-8.91687e-05	4.99517e-05	-2.65721e-05	-1.85951e-05	0.000258545
678	-0.000348112	2.70035e-07	-0.000232473	6.21e-05	-9.45046e-05	-0.000251637	-0.000140173	-0.00011463	-1.48667e-05	-8.02916e-05	-0.000216665	-7.43871e-05	-0.000273658	-1.23021e-05	-2.29058e-05
677	-0.000206017	0.000124468	-9.11101e-05	0.000184773	0.000268605	2.50308e-05	7.38475e-05	7.62908e-05	0.000135107	3.48957e-05	-5.71542e-05	-5.66119e-05	-0.000183258	0.000114905	6.70835e-05
676	7.05589e-06	0.000228369	7.36557e-05	0.000193484	0.000228056	0.000164415	3.10784e-05	0.000253288	0.000234042	4.67741e-05	-0.000123512	-0.00027873	-1.63959e-05	-7.26452e-05	-7.74495e-05
675	-7.40192e-05	0.000208137	0.000171856	0.000220846	0.000193249	0.000154793	0.000131736	0.000194943	0.000238216	1.78668e-05	-0.000110795	-0.000545235	1.36802e-05	-1.39628e-05	-0.000215138
674	-2.68788e-05	0.000124962	0.000135189	0.000260225	0.000157235	0.000144757	0.000120927	0.000199634	0.000211824	-1.38504e-05	-0.000237246	-0.000250724	-5.32004e-05	-0.000136547	-8.66626e-06
673	5.34842e-05	9.98379e-05	1.38823e-05	0.000186099	5.47179e-05	0.000132978	-0.000119329	0.000215991	0.000301691	-0.000123652	-0.000219572	-1.151e-05	-0.000322442	-0.000239791	-1.95451e-05
672	2.40632e-05	0.000178478	6.74573e-05	0.000165944	5.6975e-05	0.000315598	-9.2779e-05	0.000254178	0.000478571	-0.00010629	-0.000272209	5.25237e-05	-0.00036212	-9.45593e-05	-2.34753e-05
671	-5.34882e-05	0.000206948	5.7142e-05	0.000198394	9.7146e-05	0.000296038	2.6708e-05	0.000264615	0.000271105	4.80212e-05	-9.96718e-05	0.000380556	-0.000276705	9.69645e-05	0.000341611
670	-0.000163747	0.000114925	-6.51343e-05	0.000158836	5.94897e-05	0.000127098	-6.95651e-07	0.000117571	0.000293694	4.95023e-05	-5.96936e-05	-3.98578e-05	-7.8151e-05	-1.53045e-06	0.00021102
669	-5.73287e-05	9.6888e-05	3.38867e-06	0.000123377	0.000131002	0.000120838	-9.80166e-06	0.000129012	0.000329765	-4.2914e-05	-0.000266148	-0.000170155	-2.66707e-05	-9.06639e-05	-4.5908e-05
668	2.24792e-05	-1.40246e-05	-6.64016e-05	3.18671e-05	0.00018339	7.82304e-05	-3.57229e-05	0.00012535	0.00033826	-8.11268e-05	-0.000181767	2.7909e-05	-5.21302e-05	0.000145893	0.000114713
667	-0.000159272	-0.000115235	-0.000177729	-5.73652e-05	-9.33562e-05	7.77778e-05	5.44244e-05	-1.53989e-05	0.000100381	-0.000135968	-0.000178936	0.000121491	-0.000189652	0.000154744	0.00023499
666	-0.000127397	-3.77433e-05	-0.000139577	3.20653e-05	-2.7625e-05	0.000118047	0.000165554	7.14586e-05	0.000221804	-0.000111875	-0.000375623	4.35811e-05	-4.13017e-05	-0.000191191	0.000221776
665	-9.13232e-05	0.000122805	-4.16923e-05	0.000127456	6.5766e-05	5.59769e-05	4.9237e-05	7.60937e-05	0.000369427	-0.000114546	-0.000316512	-8.96343e-05	-7.37094e-05	-0.000257856	9.75383e-05
664	-0.000122982	0.000146048	-9.15457e-05	1.0168e-05	-4.63833e-06	8.09437e-05	-4.17363e-05	-9.7146e-05	0.00030155	-0.000141334	-0.000396733	4.32133e-05	-0.000126908	-0.000261153	8.15592e-05
663	-0.000111201	7.81382e-05	-0.000146566	-1.03816e-06	-1.19442e-05	-5.91722e-05	-9.52884e-06	-8.76452e-06	0.000178308	-0.00014751	-0.000248635	8.15194e-05	-7.53665e-07	-0.000117269	0.00018768
662	-0.000299902	-4.3168e-05	-0.000269318	-0.000151092	-0.000148377	-0.000251618	-0.000206601	-0.000105738	-1.64436e-06	-0.000149096	-6.62889e-05	-2.72523e-05	-0.000188306	0.000220526	0.000141286
661	-0.000283331	8.35633e-05	-0.000139261	1.0148e-05	2.6406e-05	-8.79157e-05	-8.0799e-05	-4.62647e-05	0.000261858	2.99823e-05	-9.40008e-05	8.93226e-05	-0.000179594	0.000122259	-3.64092e-05
660	-0.000223063	9.56008e-05	-0.000126985	0.000252603	9.95315e-06	-6.34278e-05	-2.10513e-05	4.30885e-05	0.000327509	-1.13727e-05	-0.000228032	0.000148173	-0.000238693	-0.000145904	0.00019877
659	-2.09124e-06	0.000130961	-5.06532e-06	0.000325383	0.000127379	8.79113e-05	0.000114868	0.000211651	0.000285555	0.000173364	-0.000390551	6.44759e-05	-9.80257e-05	-0.000217712	0.000104014
658	-0.000203958	-2.23599e-05	-0.000201251	6.25157e-05	-6.44306e-05	-1.89613e-05	-5.06912e-05	7.37138e-06	0.000196085	0.000299583	-0.00027266	-8.08672e-05	0.00010687	-0.000151086	9.90234e-05
657	-0.00026769	-0.000116285	-0.00028781	-7.9243e-05	-2.56053e-05	-5.17857e-05	-5.63524e-05	5.22999e-06	0.000253758	9.37763e-05	-0.000174857	0.000116991	-0.00013867	-0.000174642	0.000253287
656	-7.67908e-05	-8.37357e-05	-0.000167434	8.6037e-05	0.000107759	8.04469e-05	0.000120867	0.000124481	0.00032537	-2.69971e-05	-0.000130764	-7.53181e-06	-0.00029999	0.000112447	2.85711e-05
655	-2.76308e-05	-9.0784e-05	-9.25553e-05	0.000112963	3.84233e-05	0.000166829	-1.91876e-05	9.8779e-05	0.000208339	5.49304e-05	-0.00017058	9.97283e-05	-0.000138116	0.000163321	7.31468e-05
654	-0.000102747	-6.72038e-05	-2.62095e-05	5.19037e-05	0.000122311	0.000142341	-9.95922e-05	0.000145171	0.000168031	0.000126702	-6.3589e-06	-0.00022905	6.69552e-05	0.00019728	3.13311e-05
653	-0.000184892	-3.83372e-05	-9.11492e-05	-8.64099e-05	9.8412e-07	-8.53238e-05	-0.000183654	6.99128e-05	5.52395e-05	0.000145311	0.000199457	-0.000261809	3.77573e-05	3.14036e-05	-0.000236191
652	-0.000104351	5.89138e-05	-1.43112e-05	2.79672e-05	0.000174183	1.45187e-05	2.33208e-06	0.000149405	0.000222042	7.46512e-05	4.82846e-05	-0.000132471	-0.000168149	-0.000101011	-0.00027536
651	-3.93122e-05	1.24666e-05	-4.04254e-05	0.00017325	0.000291431	0.000110764	8.94269e-05	0.000229554	0.000279857	-4.6837e-06	0.000116832	4.16314e-05	-6.2387e-05	0.000123588	6.06647e-05
650	0.000208132	0.000467778	0.00014881	0.000319503	0.000377061	0.000311699	0.00032224	0.000406573	0.000383543	-3.29767e-05	9.85861e-05	0.000333063	-0.000264293	0.000186221	0.000275952
649	5.99977e-05	0.000386918	0.000103927	0.000300733	0.000460787	0.000292771	0.000323624	0.000457971	0.000368351	-0.000148838	-0.000218791	6.41911e-05	-8.53747e-05	-0.000121042	0.000183777
648	-0.000100569	0.000222075	9.8007e-05	0.000272184	0.00038512	0.0002763	0.00013657	0.00040782	0.000482774	-0.00028204	-0.000306025	9.97615e-06	-9.35097e-05	-0.000225209	-6.86033e-05
647	-6.31103e-05	0.00012518	4.15805e-05	0.000137473	0.000169116	0.000192666	0.000226729	0.000333079	0.000378889	-4.28511e-05	-8.43303e-05	9.40662e-06	-7.62477e-05	-1.66466e-05	-1.74113e-05
646	-2.55718e-05	0.000167985	-5.21856e-05	7.31675e-05	9.89484e-05	0.00016576	0.000177373	0.000175383	0.000319013	-6.6809e-05	0.000109403	8.57838e-06	7.83765e-06	0.000125552	0.000299791
645	-3.72535e-05	7.10307e-05	-0.000162346	0.000109557	5.14313e-05	8.0229e-05	2.61723e-05	0.000105416	0.000374752	-5.17933e-06	2.4754e-05	-8.77636e-05	3.3834e-05	-6.04175e-05	0.000244568
644	0.000125869	0.000156026	0.000127744	0.000311207	0.000316991	0.00027091	0.000246053	0.000368577	0.000554997	8.72204e-05	2.46879e-05	-9.35687e-05	0.00013006	9.48553e-06	4.04928e-05
643	3.76846e-05	0.000112113	-5.22259e-06	0.000220846	0.000244111	0.000163942	0.000139086	0.000171996	0.000502569	0.000113098	-7.03409e-06	0.000355057	-4.86253e-05	0.000222881	0.000118875
642	-1.72765e-05	0.000142642	-8.7012e-05	0.00021746	7.34473e-05	7.81937e-05	0.000121717	0.000117452	0.000328834	7.07317e-05	-3.10198e-05	1.45329e-05	-9.82167e-06	5.69639e-05	-2.11356e-05
641	4.95638e-05	0.000109361	1.59417e-05	0.000268818	0.000186735	8.85666e-05	0.000202637	0.000304984	0.000272607	0.000237456	0.000143212	-8.51612e-05	6.87797e-05	2.16539e-05	-2.22835e-05
640	3.25968e-05	-1.0322e-05	-2.61707e-05	0.000151432	0.000314199	0.00015901	7.87964e-05	0.000251016	0.000405203	0.000295844	0.000238844	-0.000207077	0.000107424	0.000153146	-5.59017e-05
639	-4.52122e-05	-0.000214328	-8.65167e-05	7.89883e-05	0.000149197	0.000137885	7.18684e-05	8.20065e-06	0.000189158	7.5839e-05	-5.04983e-05	-3.76976e-05	0.000101666	0.000195703	-2.15737e-05
638	-5.16862e-05	-3.11697e-05	-1.16466e-06	8.24533e-05	0.000249359	0.000110899	0.000190939	0.000138736	0.000270509	-3.61408e-05	-0.000189852	0.00011902	2.41254e-06	-6.07613e-05	0.000225391
637	1.19862e-05	9.57397e-05	-4.20883e-05	0.000177507	0.000215028	3.81193e-05	0.000168149	7.51003e-05	0.000429969	-5.1586e-05	-0.000255434	0.000187693	-4.23527e-05	-0.000265578	0.000318994
636	-3.34915e-05	0.000194258	-4.15343e-05	0.000261789	0.000313803	0.00014038	0.00016094	0.0001049	0.000292646	-0.000124444	-0.000156057	8.49018e-05	-1.04138e-05	-0.000256341	0.000208575
635	-0.000146245	0.000102253	4.66887e-05	0.000116606	0.000189745	0.000101296	0.00011566	0.000131233	0.00032143	-3.19024e-05	-3.95777e-05	0.000141737	8.6081e-05	2.35593e-05	0.000292478
634	-0.000268937	-2.26961e-05	-9.10345e-06	9.78367e-05	3.43846e-05	-2.11981e-05	3.25253e-05	7.30855e-06	0.000260649	7.2944e-05	9.63114e-05	5.15903e-05	4.25273e-05	-2.40414e-05	0.000125294
633	-0.000113755	0.000161867	0.000163521	0.000254622	0.000158701	0.000111416	0.000167376	0.000155941	0.000344536	0.000134639	0.000139919	6.6084e-05	0.000183116	2.38838e-05	0.000245032
632	-6.59218e-05	9.8689e-05	7.14563e-05	0.000183386	0.000127438	0.000184095	0.000125658	0.000184391	0.000241348	-8.62936e-05	0.000121321	0.000162667	-0.000203034	-2.83433e-05	0.000394753
631	0.000106841	0.000160422	4.03927e-05	0.000378324	0.000302279	0.000265388	0.000216891	0.000313555	0.000443768	-0.000113001	4.37574e-05	0.000104889	-0.000357088	1.29517e-05	0.000223511
630	8.97551e-05	0.000170202	9.62049e-05	0.00033247	0.000376585	0.000214031	0.000191567	0.000262297	0.000478114	-0.000115433	-4.50913e-05	0.000196828	-5.18732e-05	4.40963e-06	0.000299681
629	-3.76098e-05	9.24534e-05	-8.1804e-05	0.000220905	0.000202892	3.4472e-05	0.000115582	4.31054e-05	0.000234139	-9.64102e-05	5.70301e-05	0.00013718	7.17064e-05	-6.05585e-05	0.000314469
628	-0.00016345	8.60533e-06	1.82532e-06	0.000201879	1.6843e-05	-3.8659e-05	0.000201844	2.1111e-05	0.000239288	-0.000165845	0.000198247	4.9356e-05	-9.28548e-05	0.000131044	0.000161554
627	-0.000126723	-2.73092e-05	-2.16959e-05	0.000108548	0.00013526	0.00011983	0.000330933	-1.81099e-05	0.000393797	-0.000126445	0.000168429	6.27631e-05	1.75217e-05	0.000188599	0.000132361
626	-5.7844e-05	3.36902e-05	-6.00262e-05	0.000179605	0.000319207	5.67318e-05	0.000360015	0.000115328	0.000387598	-8.18389e-05	0.000114869	-1.67941e-05	5.17345e-05	5.91738e-05	0.000188824
625	-0.000163331	3.60859e-05	-0.000188816	0.000119476	0.000296717	0.000103514	0.00033044	0.000190367	0.000368234	6.10088e-05	2.543e-05	7.87636e-05	0.000105625	1.46311e-05	0.000257818
624	-0.000428356	-0.000245887	-0.000494607	-0.000136362	-7.50229e-05	-0.000153295	-3.83713e-05	-0.000100668	9.85554e-05	1.47945e-05	0.000129943	9.01858e-05	0.000236255	-1.72005e-05	0.000159916
623	-0.000202196	-0.000170097	-0.000115066	9.53816e-05	-2.56844e-05	2.25992e-05	0.000146586	0.000182963	0.000254593	-0.000167764	0.000286483	7.8289e-06	6.50193e-05	0.000250308	0.000253576
622	-2.50646e-06	6.90905e-05	3.24539e-05	0.00030006	0.000188181	0.000311601	0.000256467	0.000326187	0.000402921	-8.01155e-05	3.79625e-05	0.000103277	7.39077e-05	0.000255591	0.000334115
621	-7.2356e-05	-4.42768e-05	-0.000191568	0.000214886	0.000129752	0.000205238	0.000243185	9.02482e-05	0.000310722	5.515e-05	3.42574e-05	9.02647e-05	0.00011887	5.58343e-05	0.000304891
620	0.000154002	0.000394541	0.000209038	0.000488088	0.000506069	0.000313578	0.000551211	0.000341908	0.000536105	5.77833e-05	-7.20052e-05	0.00034477	7.76066e-05	0.00025682	0.000101897
619	2.27365e-05	9.41157e-05	5.44097e-05	0.000337024	0.000373674	0.000303264	0.000404644	0.000206347	0.000407754	0.000197976	5.8503e-05	0.000363588	0.000351406	0.000191977	0.00035051
618	0.000121275	-7.07473e-05	0.000106877	0.000175922	0.000340375	0.000404554	0.00024572	0.000233314	0.00046808	0.000124938	0.000221535	0.000188293	0.000217688	7.88365e-05	0.000422263
617	-7.40392e-05	-1.69153e-05	-4.97493e-05	1.58103e-05	6.25383e-05	0.000128263	6.64233e-05	0.000122657	0.00023499	0.000103635	6.39937e-05	0.000164069	0.000156585	1.56263e-06	0.000296689
616	-8.54235e-05	0.000107718	5.745e-06	8.89867e-05	2.60799e-06	4.96637e-05	2.7703e-06	0.000129194	0.000385954	8.42363e-05	-0.000153887	0.000194362	0.000163756	-0.000201637	0.000404751
615	-8.8037e-05	7.21984e-05	-3.88219e-05	0.00010045	-5.1139e-06	-2.92939e-05	4.7036e-05	0.000173126	0.000317966	1.75274e-05	-5.32197e-05	0.000278291	0.000201274	-5.05255e-05	0.000316918
614	-0.000105163	0.000100768	-4.34944e-05	9.28276e-05	0.000210019	7.89826e-05	0.000261103	0.000335849	0.000409813	0.000252841	0.000191963	0.000260411	0.000369698	0.000339791	0.000254873
613	-0.00016539	0.000149295	-3.6961e-05	0.000115259	0.00016854	4.22577e-05	0.000288384	0.000231136	0.000391181	0.000111337	0.000160806	0.000218634	0.00013851	0.000185752	-1.77794e-05
612	-0.000139019	4.9252e-05	5.88447e-05	0.000154064	0.000242171	7.5004e-05	0.000246667	0.000244974	0.000364157	0.000152854	1.94643e-07	-1.33373e-05	0.000168604	-0.000113873	-0.000135634
611	-9.87482e-05	0.000107322	8.39893e-05	0.000179011	0.000199387	0.000317776	0.000357063	0.000173143	0.000364453	0.000178951	-0.000119335	0.000174764	0.000213271	-0.000207534	0.000335863
610	1.41645e-05	0.000268028	0.000125032	0.000277668	0.000271969	0.000384812	0.000524165	0.00032813	0.000436859	-2.1175e-05	0.000126626	0.000198213	0.000160252	1.03648e-05	0.00036779
609	0.000156971	0.000198019	8.60483e-05	0.000366762	0.000364409	0.000295169	0.000462592	0.000356839	0.000386885	0.000127116	-3.83528e-05	3.89472e-06	0.000366749	0.000107962	0.000156849
608	-3.47981e-05	6.70908e-05	-8.13099e-05	0.000304218	0.000188517	0.000186688	0.000343268	0.000219434	0.000389164	0.000105024	-1.86677e-05	0.000153164	0.00027324	0.000175695	3.51516e-05
607	-0.000184041	0.000150621	0.000116894	0.000349319	0.000260663	6.7263e-05	0.000254586	0.000172453	0.0003992	0.000144598	-4.0524e-05	0.000309333	0.000169218	0.000162832	9.97202e-05
606	-0.000199424	0.000107856	8.93348e-05	0.000244723	0.000339781	6.07699e-05	0.000256867	0.000142993	0.000514486	0.000241715	-0.000119191	-0.000158001	2.85683e-05	5.07372e-05	8.38684e-05
605	8.55382e-05	0.00013894	0.000141287	0.000218292	0.000273453	0.000209929	0.000341149	0.000289559	0.000618313	0.000237003	-1.45291e-05	-0.000113732	0.000123799	-0.000125221	1.9103e-05
604	6.00965e-05	0.000197465	8.02273e-05	0.000209125	0.000185567	9.46436e-05	0.000307727	0.0003683	0.00038641	0.000227772	-0.000164396	0.000290673	0.000306956	-0.00017519	0.000294038
603	0.00013842	0.000291132	0.000169203	0.00024007	0.000321228	0.000105297	0.00019141	0.000481054	0.000504784	0.000202211	0.000121833	0.00015485	0.000257581	0.000108538	0.00044846
602	0.000136619	0.000333363	0.00025509	0.000257117	0.000500287	0.000286256	0.000330576	0.000480343	0.000511956	0.000156083	0.000151713	6.51814e-05	0.000110257	0.00027898	0.00040178
601	9.38335e-05	0.000243596	0.000251526	0.000284003	0.000368923	0.000279127	0.000435051	0.000339671	0.000527457	0.000200508	-0.000159297	-7.12632e-05	0.000180998	0.00014618	0.000182322
600	6.08295e-05	0.000198514	0.000190407	0.00029717	0.000188082	0.000131174	0.000377021	9.0308e-05	0.000595564	7.64753e-05	-0.000119171	-0.000446238	0.000219092	9.83778e-05	-0.000301464
599	-8.46593e-06	0.000364309	0.000151444	0.000238051	0.00038896	0.000126993	0.000346099	0.000140973	0.000553253	0.000341202	1.8464e-05	-0.000134031	0.000355366	9.9441e-05	1.04101e-05
598	8.17368e-05	0.000226213	0.000147702	0.00033453	0.000401929	0.000252202	0.000289535	0.000144773	0.000555195	0.000248998	0.0001401	0.000214113	0.000411951	0.000243526	0.000339451
597	0.000194253	0.000297011	0.000212088	0.000477357	0.000356966	0.000468227	0.000381537	0.000314883	0.00054494	0.000201859	0.000260101	0.000225636	0.000475269	0.000266713	0.000232493
596	5.92655e-05	0.000185647	0.000199317	0.000302793	0.000216216	0.000386895	0.000361895	0.000271881	0.000429611	0.000345222	0.000137688	0.000405955	0.000614212	6.64459e-05	0.000169668
595	0.000119987	0.000240963	0.000104877	0.00030988	0.000306993	0.000405088	0.000435468	0.000283957	0.000440658	0.000511585	0.000103727	0.000343394	0.000578872	-0.000164051	0.000162304
594	0.000235671	0.000355577	2.94637e-05	0.000422258	0.000336888	0.000265903	0.000465467	0.000389367	0.00053393	0.00036302	0.000136721	9.76778e-05	0.000244217	-0.000132162	0.000249821
593	0.000158397	0.000351716	0.000123527	0.000479634	0.000331602	0.000363076	0.000551946	0.000390396	0.000666979	0.000163786	5.83626e-05	-8.09023e-05	8.73127e-05	-0.000118974	0.000174041
592	0.000114306	0.000230668	4.78566e-05	0.000399885	0.000326356	0.00030184	0.000396587	0.000328544	0.000537714	-1.06836e-05	-6.11488e-06	0.000111944	4.3993e-05	-2.00069e-05	-5.1402e-05
591	0.00025646	0.000245397	0.000115985	0.000538872	0.000334948	0.000384615	0.000503221	0.000490461	0.000511145	1.68744e-05	6.68647e-06	-4.53431e-05	2.40311e-05	7.76692e-06	-4.36689e-05
590	0.000284634	0.000302596	0.000208998	0.000474486	0.000435723	0.000327579	0.000621339	0.000389959	0.000530109	-2.66222e-05	4.31243e-05	-6.42095e-05	-7.36155e-05	0.00022108	0.000263254
589	0.00019556	0.000323642	0.000193932	0.000277866	0.000490724	0.000233233	0.00042634	0.000271545	0.000489583	4.69523e-05	-7.66532e-05	-7.76119e-05	-6.01276e-05	9.53479e-05	0.000266015
588	0.000154161	0.000358151	0.00034848	0.00027545	0.000449405	0.000525445	0.000426481	0.000344718	0.000564381	-4.29576e-05	-9.68882e-05	-7.85014e-05	1.78557e-05	-4.18561e-05	-1.7797e-05
587	8.32412e-05	0.000479675	0.000308922	0.000449045	0.000439664	0.000513405	0.000593761	0.000537421	0.000728098	-3.63822e-05	-0.000106743	-6.21324e-05	-1.84155e-05	3.73414e-06	0.00022869
586	9.83877e-05	0.000346412	0.000197634	0.000484327	0.000400383	0.000268695	0.000471898	0.000491109	0.000707108	0.000102623	-0.000191492	3.25926e-05	0.000144863	-6.08859e-05	0.000323288
585	0.000108307	0.000299229	0.000202485	0.000456688	0.000465024	0.000307324	0.000426261	0.000463771	0.000680954	0.000127887	-0.000105469	1.04757e-05	0.000111367	2.50476e-06	0.000169563
584	1.58669e-05	0.000246605	0.000169362	0.000309148	0.000264919	0.000218862	0.000386249	0.000390932	0.000465782	0.000155471	-2.78262e-05	0.00022366	0.000194084	7.62552e-05	7.28887e-05
583	-0.000161906	0.000164027	0.000106164	0.000211401	0.000122132	0.000192786	0.000321686	0.000187123	0.000471126	7.8356e-05	-0.000141414	0.000280911	6.84427e-05	-0.000328293	0.000317172
582	-9.41745e-05	0.000155393	0.000111529	0.000289606	0.000193269	0.000195556	0.000380073	0.000316548	0.000591879	-0.000124523	-0.000235016	0.000373586	-0.000110973	-0.00025081	0.000487265
581	9.8478e-06	8.51867e-05	0.000172844	0.000219123	0.000207425	0.000197062	0.000357462	0.000409366	0.000564856	-5.58029e-05	-0.000141557	0.000377148	-2.77196e-05	-7.59804e-05	0.000493719
580	9.72192e-05	8.39987e-05	0.000198109	0.000266442	0.000269633	0.000306726	0.000407769	0.000482499	0.000499263	-2.1193e-05	0.000120559	6.77312e-05	0.000249387	-4.84121e-05	0.000140997
579	0.000127967	0.000190437	0.000257764	0.000424416	0.000393118	0.000360916	0.000447092	0.000404966	0.000508312	5.87307e-05	6.79041e-06	-0.00016906	0.000252591	-5.90224e-05	-3.22424e-06
578	-8.1691e-06	2.51567e-05	4.09071e-05	0.000227042	0.00016161	0.000176949	0.000269636	0.000182886	0.000549749	0.000189182	-0.00013658	-1.64873e-05	0.000291792	0.000133827	0.000295182
577	0.000103555	0.000137158	0.000125151	0.000196394	0.000139179	0.000177246	0.000328713	0.000285839	0.000548603	-4.51472e-05	1.06574e-05	-0.000124484	4.50361e-05	0.000270359	0.000480159
576	0.000232821	0.000344252	0.000229866	0.000284419	0.000262663	0.000306334	0.000423707	0.000435774	0.000513024	-0.000104017	0.000189217	-0.000208071	0.000127917	0.000255919	0.000173546
575	0.00025751	0.000406539	0.000313733	0.000438334	0.000314398	0.000306571	0.000485857	0.000480714	0.000599584	-9.23933e-05	0.000188134	0.00011569	0.000332713	0.000241376	0.000237909
574	0.000306591	0.000354687	0.000300687	0.000468448	0.000337662	0.000395091	0.000606848	0.000437971	0.000733897	-0.000109615	0.000216865	0.000206379	0.000367442	0.000200767	0.000332239
573	0.000274912	0.000326315	0.000194545	0.000429068	0.000396384	0.000418096	0.000706946	0.000430232	0.000631772	-6.62378e-05	-5.09135e-06	0.000164481	0.000471425	0.000193696	0.000309211
572	0.000128897	0.000200712	0.000380909	0.000347359	0.000408718	0.000300055	0.000732665	0.000441912	0.000591268	0.000109217	-0.000112512	8.02927e-05	0.000334493	0.000127872	0.0002663
571	-2.05149e-06	0.00018315	0.000332798	0.000208847	0.000406976	0.000253468	0.000611501	0.000405701	0.000589958	-7.30655e-05	0.000136474	7.7373e-06	8.63012e-05	0.000174217	0.000212242
570	-2.10982e-06	0.00019014	0.000283877	0.000202374	0.000409392	0.000332605	0.000519518	0.000348187	0.000496652	-5.333e-05	0.000377236	3.89722e-05	-1.91866e-05	0.000170699	0.000248082
569	0.000183423	0.000294399	0.000239269	0.000317166	0.000309942	0.000422034	0.000411851	0.000410511	0.000503124	2.03216e-05	0.00033195	-0.00010624	0.000138272	0.000200847	-2.02241e-05
568	0.000132936	0.000253476	0.000152671	0.000322591	0.000160284	0.000433952	0.000275338	0.000286352	0.000511678	0.000131013	4.82396e-05	-0.000487283	0.00020852	0.000178438	-0.00026024
567	-1.10398e-05	0.000286717	4.3006e-05	0.000299565	0.000167452	0.000268278	0.000285791	0.000251331	0.000458065	0.000159963	-3.57913e-05	-3.15918e-06	7.44227e-05	-1.46766e-05	0.000208264
566	0.000193738	0.000381197	0.000302448	0.000516974	0.000454315	0.000407899	0.000595422	0.000651699	0.000689012	0.000118722	0.000124861	0.000261107	7.40086e-05	0.000137638	0.000360587
565	0.000123373	0.000399648	0.000300805	0.000503056	0.000276741	0.000322786	0.000553786	0.000473392	0.000566952	-6.88694e-05	9.39186e-05	0.000152147	8.26173e-05	0.000168936	0.00025472
564	7.48664e-05	0.000379117	0.000245031	0.000529863	0.000247814	0.00029445	0.000531887	0.000371427	0.00048255	9.46067e-05	0.000105263	0.000423415	0.00018767	-5.82069e-05	0.000226767
563	0.000125294	0.000353222	0.000185658	0.000399529	0.000303685	0.000176729	0.000491162	0.000362105	0.000431119	0.000273449	0.000187946	0.000170496	0.000448676	9.71473e-05	0.000249357
562	0.000325003	0.000504739	0.000516053	0.000506382	0.000414021	0.000356619	0.000711303	0.000589193	0.000611916	0.000563306	6.76409e-05	0.000167166	0.000503992	0.000159966	0.000354054
561	0.000228287	0.000415193	0.000469827	0.000496285	0.000356808	0.000383767	0.000615793	0.0006238	0.000541413	0.000338985	3.82889e-05	0.000337742	0.000159322	-9.70323e-06	0.000283181
560	0.000143548	0.000207463	0.000203277	0.000283627	0.000296341	0.000259131	0.000466431	0.000420844	0.000558917	2.52511e-05	0.000293653	0.000316313	0.000140014	2.30476e-05	0.000106205
559	0.000113771	0.00029129	0.000187398	0.000314157	0.000315584	0.000238538	0.000512922	0.000392358	0.000607442	-0.000129214	0.000461787	0.000119857	0.000150549	0.000244226	3.26546e-05
558	0.00017483	0.000294995	0.000131645	0.000303723	0.000321762	0.000272536	0.000456079	0.000396059	0.000615146	-0.00012088	0.000250088	0.000197227	7.44298e-06	0.000366906	0.000220501
557	0.000195698	0.000241974	0.000174072	0.000332391	0.000367062	0.000261074	0.000649987	0.00043603	0.000659674	-0.000165373	0.000113435	3.33244e-05	4.92375e-05	0.000387247	0.000226771
556	0.000339733	0.000384365	0.000384553	0.000623214	0.000550695	0.000401188	0.000702911	0.000564444	0.000746311	-5.53291e-05	0.000350034	-3.17653e-05	0.000350948	0.000377518	0.000327582
555	0.000409821	0.000344332	0.000389107	0.00062656	0.000590628	0.000587058	0.000652781	0.000562168	0.000770088	0.000159387	0.000389851	0.000230298	0.000538563	0.00020429	0.00037253
554	0.000394774	0.00043	0.000290133	0.000494701	0.000465443	0.000519526	0.000718056	0.000630829	0.000831366	0.000108348	0.000169963	0.000224961	0.000478078	0.00025414	0.000323709
553	0.000418215	0.000439622	0.000199772	0.000470883	0.000470727	0.000483193	0.000680159	0.000711493	0.000867223	-6.13064e-05	-6.53694e-05	0.000223165	0.00021796	-8.7862e-07	0.000191063
552	0.000449695	0.000411627	0.000362438	0.000665286	0.00076373	0.000544588	0.000853698	0.000758531	0.00105226	-0.00014349	-9.81182e-05	0.000204435	-4.37736e-05	0.000139214	0.000317698
551	0.000408672	0.000384463	0.000243804	0.000649744	0.000782579	0.0004766	0.000682617	0.000645797	0.000998607	0.000264221	-3.33336e-05	0.000208101	0.000102395	0.00048144	0.000416716
550	0.000398635	0.000428971	0.000248853	0.000466805	0.000596488	0.000522041	0.000631557	0.000477074	0.000824337	0.000447102	8.79153e-05	2.87379e-06	0.000207768	0.000324409	0.000219143
549	0.000323142	0.000291289	0.000290905	0.00039935	0.000551032	0.000617962	0.000677191	0.000433675	0.000792738	0.000316864	0.000224875	-0.000175855	0.000427807	0.000310747	0.000190125
548	0.000450725	0.000347738	0.00021735	0.000596169	0.000560337	0.000608936	0.00064298	0.000482976	0.000776583	0.000124285	0.000195032	0.000286874	0.000402425	0.000343151	0.000451014
547	0.000444746	0.000301784	9.37502e-05	0.000609652	0.000431188	0.000386121	0.000651235	0.000537778	0.000696855	0.00027337	0.000186817	0.000297775	0.000351763	0.000348004	0.000336174
546	0.000408712	0.000403095	0.000134714	0.00055481	0.000452097	0.000281248	0.000615025	0.000496298	0.000617205	0.000146342	0.000232107	0.0002164	0.000362315	0.000290677	0.000424419
545	0.000353316	0.000410796	0.000102817	0.000439938	0.000438731	0.00021007	0.000409137	0.000482677	0.000601247	5.45328e-05	0.000251849	0.00023506	0.000402129	0.000382495	0.000427876
544	0.000372342	0.000427009	0.000308903	0.00060486	0.000571186	0.000372855	0.000603125	0.000662332	0.000802422	0.000158259	0.000421227	5.42826e-06	0.000414422	0.000313532	0.000148231
543	0.000325082	0.000460589	0.000343234	0.000691916	0.000591497	0.000519286	0.000690436	0.000673376	0.000783673	0.000291429	0.000363105	0.000104841	0.000378192	0.00041453	0.000580847
542	0.000321143	0.000393056	0.000242657	0.000551959	0.000606526	0.000506676	0.000607839	0.000622673	0.000711883	0.000400793	0.000127342	9.10226e-05	0.000526026	0.00022055	0.000646528
541	0.00041873	0.000525076	0.000260019	0.000555938	0.000630862	0.000493329	0.000721955	0.000781065	0.000855085	0.00038523	0.000116505	3.22817e-05	0.00052435	4.80721e-05	0.000448928
540	0.000565696	0.000454552	0.000471489	0.000592883	0.000633355	0.000496382	0.000870862	0.000862082	0.000883022	0.000138164	0.000231635	9.61972e-05	0.000436104	0.000270622	0.000144012
539	0.000382261	0.000186419	0.000296765	0.000517826	0.000437088	0.000353295	0.000700155	0.000564721	0.000750252	7.91651e-05	0.000191924	9.92903e-05	0.000370055	0.00044367	0.00026874
538	0.000462565	0.000357576	0.000376117	0.000646181	0.0006113	0.000441756	0.000807783	0.000689713	0.00094901	0.000328746	5.47383e-05	5.85658e-05	0.000346036	0.000171188	0.000295309
537	0.000563676	0.000350487	0.000577827	0.000774694	0.000726127	0.00051509	0.000869337	0.0007914	0.00100542	0.000519883	3.9722e-05	9.54959e-05	0.000363323	0.000142885	0.000382958
536	0.000649286	0.000384763	0.00049679	0.000978165	0.00084686	0.00065473	0.000850963	0.00086802	0.00103096	0.000373034	2.49571e-05	0.000104004	0.000345034	0.000110582	0.000424967
535	0.000711454	0.000558454	0.000440845	0.00105722	0.000934074	0.000776967	0.00102587	0.000987228	0.00105495	0.000194669	-2.36871e-05	0.00021523	0.000284546	0.000170717	0.000538637
534	0.000767345	0.000598309	0.000441655	0.000963019	0.000879947	0.000754774	0.00102131	0.00109078	0.001188	0.000182374	0.000148992	0.000179653	0.00025865	0.000437955	0.00053369
533	0.00078253	0.000458469	0.000649021	0.000905662	0.000762954	0.000689771	0.00099852	0.00107674	0.00119649	0.000352308	0.000119785	0.000263289	0.000321768	0.000227842	0.000533116
532	0.000980181	0.000454808	0.000634292	0.00089012	0.000976425	0.000700738	0.00108534	0.00109721	0.00124463	0.000570508	0.000304284	0.00038368	0.000368791	0.000367706	0.00031283
531	0.000948563	0.000291725	0.000402137	0.000845732	0.00086189	0.000574983	0.00114807	0.000955863	0.00130275	0.000361372	0.000220554	0.000429479	0.000295455	0.000423275	0.000567339
530	0.000888176	0.000355497	0.000251884	0.000853077	0.000914892	0.000534572	0.00123425	0.000961885	0.00140177	0.000328945	5.879e-05	0.000167604	0.000356535	0.000258357	0.000386941
529	0.000958442	0.000527194	0.00025307	0.000993726	0.000971986	0.000544926	0.00127565	0.00106622	0.00146031	0.000246643	0.000231368	9.2946e-05	0.00034503	0.000315045	0.000216935
528	0.00115817	0.00068372	0.000457907	0.00123982	0.000999172	0.000690565	0.00119291	0.00122582	0.00148183	0.000129017	0.000169062	0.000186155	0.000153357	0.000332273	0.000365078
527	0.00121044	0.000681167	0.000660463	0.00128695	0.0011385	0.000782013	0.00124579	0.00130032	0.0014912	0.000390004	0.00014516	5.88547e-05	0.000377697	0.000306857	0.0003203
526	0.0010133	0.000520857	0.000386789	0.00121494	0.000972247	0.000677917	0.00118178	0.00123754	0.00152749	0.00042467	0.000282223	0.000409417	0.000432443	0.000276338	0.000541441
525	0.00107044	0.00063678	0.000430824	0.00131609	0.00094467	0.000761013	0.00126068	0.00129666	0.00162963	0.000221694	0.000450496	0.000479996	0.000333587	0.000392225	0.000425427
524	0.00110749	0.000658439	0.000467232	0.00129116	0.000979869	0.000679279	0.00124748	0.00129324	0.00148177	0.000185026	0.000268769	0.000100618	0.00043848	0.000393311	0.000268797
523	0.00117825	0.000646815	0.000480932	0.0013548	0.00122603	0.000803301	0.00149998	0.00128601	0.00150992	0.000320114	0.000174635	0.000522307	0.000554974	0.000379874	0.000636692
522	0.00120011	0.000677087	0.000375327	0.00140097	0.00119934	0.000766907	0.00151444	0.00117312	0.00154796	0.000281248	0.000417625	0.000632442	0.000523598	0.000323119	0.000471024
521	0.00135513	0.000817817	0.000358339	0.00144359	0.00114264	0.000674272	0.00145413	0.00130559	0.00156544	0.000386876	0.000471106	0.000445537	0.000504786	0.000304175	0.000400685
520	0.00156151	0.000959596	0.000599645	0.00174279	0.00135569	0.000774489	0.0017325	0.00154304	0.00185708	0.000244346	0.00026299	0.000290958	0.000365503	0.000350974	0.000633669
519	0.00156379	0.000784	0.000598874	0.00162552	0.00131231	0.000761661	0.00172531	0.00158124	0.0018606	0.000190215	0.000136535	0.000103869	0.000301275	0.000285864	0.000514688
518	0.00149839	0.000600506	0.000526727	0.00161184	0.00119086	0.000705016	0.00158486	0.00157004	0.00182037	0.000423303	0.000128691	0.000238618	0.000666879	0.000320947	0.000409273
517	0.00139655	0.000636066	0.000508077	0.00173271	0.00124563	0.000618736	0.0015808	0.0015697	0.00176305	0.000114881	0.000321243	0.000249111	0.000435095	0.000537968	0.000431596
516	0.00147709	0.000716485	0.000418312	0.001891	0.00147494	0.000609328	0.00163394	0.00185375	0.00170504	0.000217836	0.000321856	0.000315603	0.000376966	0.000587184	0.000514907
515	0.0017791	0.00096094	0.000622631	0.00219389	0.00170599	0.000850954	0.00193409	0.00219944	0.00187795	0.00049165	0.000161345	0.000408794	0.000727914	0.000394805	0.000541993
514	0.00201395	0.000983192	0.000720123	0.00227826	0.00169571	0.000926745	0.00210832	0.0022111	0.00201558	0.000565757	0.00015237	0.000209609	0.00076102	0.000296596	0.000578819
513	0.00196249	0.000944153	0.000686007	0.0022279	0.00162671	0.000903619	0.00219931	0.0020485	0.00214883	0.000404298	0.000173177	-3.78246e-05	0.000572435	0.000462719	0.000667918
512	0.00193309	0.00101875	0.000575236	0.00222972	0.00164265	0.000842162	0.00223373	0.00204891	0.00215742	6.0831e-05	0.00031573	0.000113968	0.000306858	0.000326518	0.000684102
511	0.00217634	0.00113903	0.000594797	0.00235623	0.00172511	0.00085917	0.00236151	0.00221249	0.00236887	1.59057e-05	0.000441261	0.000276407	0.000132649	0.000410121	0.000567492
510	0.00236771	0.000955184	0.000619209	0.00230244	0.0019484	0.000928683	0.00272608	0.00231867	0.00265136	0.000290909	0.000271779	0.000346027	0.000346316	0.000561011	0.000801554
509	0.00254054	0.00102362	0.000692186	0.00258055	0.00200831	0.00120656	0.00274144	0.00241938	0.00256957	0.000425283	0.000287834	0.000261607	0.000396527	0.000428907	0.000712498
508	0.00278184	0.00112759	0.000788839	0.00281467	0.00212673	0.00140134	0.00290361	0.00268532	0.00251946	0.000361517	0.000445708	0.000242031	0.000428084	0.000506981	0.000634501
507	0.00261501	0.00116629	0.000858295	0.00293924	0.0022001	0.00125075	0.00286661	0.00272782	0.00261649	0.000382836	0.00045695	-7.76827e-06	0.000603976	0.000526396	0.000650221
506	0.00247866	0.00126323	0.000650729	0.00281808	0.00211287	0.000972815	0.00272231	0.00268148	0.00259788	0.000268639	0.000503261	0.000178326	0.000604926	0.000592717	0.000663572
505	0.00260262	0.00127307	0.000701092	0.00294924	0.00221432	0.00100338	0.002832	0.00269842	0.00283379	0.000268615	0.000383052	0.000484185	0.000488771	0.000605742	0.000978723
504	0.00298957	0.00137808	0.000921929	0.00321052	0.00229407	0.0011158	0.00318123	0.00299216	0.00298578	0.000314942	0.000376153	0.000519858	0.000431036	0.000781885	0.00107594
503	0.00308664	0.00150699	0.000866036	0.00329017	0.00243693	0.00119537	0.003371	0.00327166	0.00305789	0.000199916	0.000417503	0.000586459	0.000411063	0.000827204	0.00097698
502	0.00317282	0.00149834	0.000692243	0.00329948	0.00247725	0.00116688	0.00342133	0.00334675	0.00324346	0.000274142	0.00029906	0.00054828	0.000440678	0.000523568	0.000668934
501	0.00332474	0.00154361	0.000766191	0.00347618	0.00257	0.0013458	0.00341814	0.00334909	0.00342046	0.000364957	0.00030324	0.000377253	0.000465507	0.00058862	0.000789532
500	0.00331395	0.00145072	0.000787237	0.00352435	0.00261578	0.00125526	0.00350046	0.00333347	0.00329133	0.000441775	0.00048915	0.000412041	0.000479442	0.000969696	0.000802719
499	0.00347186	0.00155896	0.000810123	0.00362675	0.00255887	0.0011575	0.00371633	0.00335465	0.00346578	0.000436567	0.000366197	0.000508694	0.000645551	0.000728363	0.000897028
498	0.00348723	0.0015278	0.000912013	0.0038151	0.00269921	0.00135024	0.00391515	0.00359281	0.0036579	0.000185599	0.000275078	0.000512339	0.000449352	0.000543765	0.000982211
497	0.00362	0.00154629	0.000973901	0.00381348	0.00280208	0.00140607	0.00403227	0.00366094	0.00368897	0.000270143	0.000297235	0.000281043	0.000454119	0.000613526	0.000985957
496	0.00390676	0.00166025	0.00104803	0.00399921	0.00297033	0.00146947	0.00410579	0.00378177	0.00389789	0.000434153	0.000439212	0.000144134	0.000555666	0.000844558	0.000773369
495	0.00397418	0.00187639	0.00104906	0.00421762	0.00319269	0.00154707	0.00416599	0.00401995	0.00411618	0.000617493	0.000330597	0.000328957	0.000443233	0.000630402	0.000783178
494	0.00386766	0.00181567	0.000995977	0.00403688	0.00307515	0.0015528	0.00405712	0.00406727	0.00408162	0.000448531	0.000609351	0.000556188	0.000411731	0.000989421	0.000888809
493	0.00411872	0.00178187	0.000995638	0.00420984	0.00324674	0.00166104	0.00429181	0.00417255	0.00422799	0.000270084	0.000564581	0.000608703	0.000417931	0.00103589	0.000973698
492	0.00443394	0.00188688	0.00101837	0.00438154	0.00337973	0.00159631	0.00452637	0.00437074	0.00436523	0.000381628	0.00044523	0.000363513	0.000537708	0.000928611	0.00129514
491	0.00451315	0.00181685	0.000939528	0.00468735	0.0034568	0.00154424	0.00471766	0.0045045	0.00447373	0.000344187	0.00042287	0.000371189	0.000624804	0.000893568	0.00124271
490	0.00457564	0.00177148	0.00100819	0.00476141	0.00354917	0.00155602	0.00484107	0.00465743	0.00460598	0.000252045	0.000261473	0.000325619	0.000640508	0.000889309	0.00111042
489	0.00472197	0.00182169	0.000904505	0.00491381	0.00351495	0.00149493	0.00511918	0.00468726	0.00462368	0.000419089	0.000304957	0.000363145	0.000676206	0.000912223	0.00136663
488	0.00498629	0.00203484	0.00103662	0.00525404	0.00381528	0.00153094	0.00539662	0.00501491	0.00491039	0.000533564	0.000242697	0.000516111	0.000659987	0.000847829	0.00139803
487	0.00499185	0.00186034	0.00093066	0.00514472	0.0036268	0.00144688	0.00519412	0.00495581	0.00476675	0.000467793	0.000236939	0.000743842	0.000583903	0.000888778	0.00159326
486	0.00503459	0.002133	0.00104448	0.00520569	0.00370302	0.00177036	0.00531915	0.00501562	0.00492934	0.000543897	0.000293997	0.000483085	0.000641377	0.0010544	0.00156752
485	0.0050501	0.00208543	0.0011153	0.00536652	0.00395892	0.00179052	0.00542143	0.00519951	0.00519383	0.000437719	0.000281076	0.000150745	0.000778682	0.000970291	0.00125189
484	0.00504905	0.00199503	0.00102506	0.00537998	0.00397957	0.00179028	0.00543214	0.00521887	0.00523319	0.000618799	0.000429154	0.000369467	0.000723422	0.00122686	0.00132694
483	0.00514945	0.00207543	0.00102579	0.00556411	0.00402764	0.00182056	0.00551908	0.00527134	0.00539351	0.000629905	0.000450193	0.000594057	0.000596709	0.00134536	0.00140866
482	0.00548919	0.00228153	0.00122182	0.00591315	0.00417215	0.00186518	0.00588246	0.00553875	0.00566206	0.000492994	0.00037056	0.000624949	0.000647161	0.00120988	0.00155801
481	0.0057082	0.00239797	0.00147641	0.00602643	0.00438808	0.00193521	0.00604946	0.00566049	0.00580228	0.000319421	0.000284393	0.000628586	0.000571171	0.00130307	0.00202801
480	0.00584333	0.00235552	0.00137188	0.0059844	0.00441253	0.00183345	0.00601377	0.00574166	0.00573574	0.000349357	0.000568656	0.000716135	0.000824101	0.00141973	0.0019355
479	0.00582021	0.00236154	0.00119281	0.00598769	0.00426	0.00177941	0.00602265	0.00582909	0.00576781	0.000595334	0.00072587	0.000575001	0.000790164	0.00126871	0.00153334
478	0.00594925	0.00262478	0.00137468	0.00626612	0.00452092	0.002058	0.00615814	0.00599764	0.00599536	0.000736518	0.000597778	0.000614123	0.000570911	0.00126869	0.00185288
477	0.00619998	0.00276377	0.00143107	0.0065218	0.00486799	0.00218537	0.00630586	0.00639401	0.00615448	0.000428373	0.000716489	0.000741551	0.00048348	0.00156321	0.00186615
476	0.00634913	0.00251512	0.00143676	0.0065826	0.00489096	0.0020777	0.00628125	0.00655988	0.00614945	0.000628954	0.000775066	0.000455237	0.000613857	0.0016539	0.00179396
475	0.00644634	0.00247721	0.00143656	0.00667957	0.00494402	0.00212369	0.00654999	0.00653991	0.00624906	0.000731688	0.000587375	0.000366712	0.000584278	0.00151546	0.00176422
474	0.00651603	0.00249122	0.00137684	0.00678908	0.00503288	0.00222093	0.00656674	0.00659518	0.00625582	0.000296851	0.000342416	0.000496623	0.000387657	0.00149336	0.00178282
473	0.00658123	0.00261302	0.00140197	0.0068718	0.00511181	0.00228719	0.00677994	0.00670627	0.0063859	0.000578801	0.000389178	0.00055809	0.000659888	0.00160331	0.00204803
472	0.00672702	0.00277563	0.00145865	0.0070347	0.00516729	0.00239325	0.00706379	0.0068591	0.0066282	0.000522991	0.000488245	0.000577714	0.000506171	0.00154184	0.00195991
471	0.00677549	0.00265375	0.00140745	0.00710045	0.00507489	0.00232237	0.00716468	0.00695817	0.00665212	0.000365653	0.000530945	0.000714228	0.000574793	0.00156696	0.00218184
470	0.00674634	0.00260138	0.00142394	0.00706224	0.00505563	0.00227365	0.00713302	0.00703744	0.00654318	0.000333263	0.000625939	0.000658515	0.00052387	0.00171583	0.00226218
469	0.00683899	0.00277266	0.00147041	0.00719109	0.00528557	0.00233277	0.00709291	0.00699688	0.00677974	0.0004181	0.000865389	0.000635907	0.000660877	0.00181537	0.00212933
468	0.00709724	0.00291289	0.00146119	0.00733558	0.00542764	0.00252913	0.00731162	0.00699523	0.00699565	0.000505112	0.000784036	0.000634058	0.000715758	0.00178543	0.00208678
467	0.00712633	0.00293618	0.00146952	0.0074087	0.0054474	0.00265343	0.00746761	0.0070874	0.00701105	0.000385588	0.000613837	0.000491909	0.000653258	0.00173349	0.00216558
466	0.00733116	0.00299189	0.00163777	0.00774147	0.00554404	0.00252998	0.00749251	0.00742611	0.00725888	0.000550848	0.000851564	0.000636188	0.000929151	0.00185453	0.00251045
465	0.00742558	0.00303101	0.00174312	0.0077816	0.00564689	0.00259431	0.00761948	0.00748349	0.00736978	0.00059219	0.000828172	0.00078366	0.000941426	0.00173302	0.00258758
464	0.00760021	0.00295968	0.00166741	0.00792496	0.00568091	0.00249987	0.00785613	0.00743091	0.00728096	0.000628301	0.000767118	0.000657761	0.000778761	0.0018098	0.00253657
463	0.00762535	0.00297415	0.00156194	0.00795199	0.0057129	0.00247306	0.00791692	0.00754467	0.00725051	0.0007069	0.000670079	0.000766275	0.000654026	0.0018703	0.00245048
462	0.00763327	0.0029553	0.0016154	0.00795484	0.00574415	0.00263879	0.00793416	0.00755892	0.00737588	0.000700547	0.000836942	0.000732012	0.000931567	0.00214813	0.00231342
461	0.00784626	0.00322935	0.00188689	0.00816879	0.00600311	0.00288362	0.00808278	0.00777415	0.00766397	0.000711355	0.000674113	0.000321036	0.000950355	0.00233918	0.00213419
460	0.00795011	0.00341829	0.00214519	0.0083172	0.00619116	0.00308894	0.008341	0.00791892	0.00784742	0.000954008	0.000710364	0.000412282	0.000731601	0.00226873	0.00258747
459	0.00787998	0.00320524	0.0018624	0.00812483	0.00596888	0.00289994	0.00808566	0.00777958	0.00760785	0.000919242	0.000770437	0.000578235	0.000828258	0.00222611	0.00254115
458	0.00791698	0.00324218	0.0018321	0.00820096	0.00598638	0.0028448	0.00815719	0.00775955	0.00777526	0.000845571	0.000898222	0.000903736	0.000874054	0.00226719	0.00261298
457	0.00812667	0.00343506	0.00192237	0.00830993	0.00608056	0.00299277	0.00829349	0.00796638	0.00776257	0.000934705	0.00112427	0.0010008	0.000861005	0.00229744	0.00283155
456	0.00804841	0.00331213	0.00191075	0.00818722	0.00601505	0.00284759	0.00812173	0.00807545	0.00768768	0.000942306	0.000958415	0.000794153	0.000919373	0.00236626	0.00276784
455	0.00795027	0.00317659	0.00178501	0.00822864	0.00598567	0.00270971	0.00822239	0.00797163	0.00786911	0.000768932	0.000775416	0.000819574	0.000904242	0.00237644	0.00275089
454	0.00784622	0.00320021	0.00180643	0.00826469	0.00605043	0.00284278	0.00821634	0.00797846	0.00792386	0.000827573	0.000811401	0.000837717	0.000926853	0.00225089	0.00276569
453	0.00794146	0.0032584	0.00190652	0.00823634	0.00615374	0.00292148	0.00830376	0.0080529	0.00801468	0.000872577	0.000888555	0.000929139	0.00096728	0.0023332	0.00308705
452	0.00811406	0.00337794	0.00198439	0.0085335	0.00636594	0.00308543	0.00849123	0.00820003	0.00831335	0.000834184	0.00119035	0.00104036	0.000899078	0.00256276	0.00316618
451	0.00816213	0.00336347	0.00197031	0.00849606	0.00635161	0.00306043	0.00854472	0.00824142	0.00838587	0.0010261	0.0012583	0.000887494	0.00119429	0.00249601	0.00297348
450	0.00809109	0.00336521	0.00184192	0.00830579	0.00619207	0.00276285	0.00835649	0.00796502	0.00795368	0.000734659	0.00118838	0.00126109	0.000611696	0.00255915	0.00359417
449	0.00811252	0.00336686	0.00188319	0.00833923	0.0062145	0.00279782	0.00848521	0.00800889	0.00797166	0.000807554	0.000889497	0.00124626	0.000692004	0.00266484	0.00350301
448	0.00808324	0.00336913	0.00191737	0.00839936	0.00623909	0.00296983	0.00851936	0.00806921	0.00795474	0.000782534	0.000673132	0.000899416	0.000745024	0.00254875	0.00327821
447	0.00813328	0.00342776	0.00212135	0.00841245	0.00628174	0.00299434	0.00843345	0.00807193	0.0080272	0.000686624	0.000861027	0.000584505	0.000805091	0.00244886	0.0031703
446	0.00806597	0.00334395	0.00213495	0.00828665	0.00622666	0.00294138	0.00843465	0.008029	0.0078836	0.000849352	0.00111309	0.000933713	0.000914859	0.00247158	0.0031233
445	0.0079389	0.00334401	0.0021086	0.00840225	0.00633373	0.00290936	0.00839203	0.00810552	0.00794302	0.000871766	0.00120626	0.00129907	0.000961539	0.00261316	0.00325063
444	0.00801887	0.00344047	0.00206732	0.00852278	0.00637174	0.00302691	0.00848468	0.00805721	0.00800833	0.000772751	0.00119284	0.00112835	0.000989994	0.00264755	0.003157
443	0.00806254	0.00346502	0.00217041	0.00843785	0.00632846	0.00310397	0.00854449	0.00807935	0.00796087	0.00104556	0.00133593	0.000901572	0.00124878	0.00269464	0.00327913
442	0.00809846	0.00340943	0.0021092	0.00831231	0.00626515	0.00297149	0.00843854	0.00808768	0.00792086	0.0010085	0.00116313	0.000991359	0.000973578	0.00276911	0.00349432
441	0.00804744	0.0034181	0.00222068	0.00831288	0.00618605	0.00293805	0.00836809	0.00799416	0.00792287	0.000877961	0.00107178	0.000821743	0.000936631	0.00282054	0.00349682
440	0.0079176	0.00345041	0.00217212	0.00824858	0.0060456	0.00292679	0.00825006	0.00796034	0.00795415	0.000950365	0.00101548	0.000969185	0.001245	0.00271858	0.00365181
439	0.00784537	0.00351734	0.00224973	0.00829215	0.00607413	0.00309808	0.00817089	0.00796382	0.00786891	0.00113511	0.00119507	0.00104861	0.0013389	0.00291209	0.00345726
438	0.00792088	0.00357433	0.00234654	0.00830282	0.00626705	0.00322596	0.00830779	0.00807679	0.00789444	0.000819772	0.00138023	0.00131881	0.000917508	0.00293296	0.00330562
437	0.00798759	0.00356421	0.00252897	0.00826346	0.00634027	0.00334159	0.00837174	0.00809317	0.00785989	0.000700783	0.00138273	0.00112345	0.000855873	0.00285499	0.00334301
436	0.00793053	0.00350175	0.00251291	0.00817388	0.0061656	0.00321072	0.00820275	0.00795957	0.00785653	0.00135269	0.00134216	0.00114351	0.00142127	0.00297816	0.00330661
435	0.00790857	0.00362177	0.0026041	0.00823832	0.00616376	0.00327067	0.00834676	0.00796187	0.00795478	0.00137994	0.00130894	0.00135522	0.00155853	0.00306464	0.00353931
434	0.00785372	0.003481	0.00252635	0.00817653	0.0062026	0.00325049	0.00823874	0.00785861	0.00775963	0.00121365	0.00132853	0.00145619	0.00137021	0.0029729	0.00386564
433	0.00775905	0.00358383	0.00249458	0.00808979	0.00618494	0.00321458	0.00815428	0.00761681	0.00769643	0.00121965	0.00131049	0.00127438	0.00132045	0.00291579	0.00373492
432	0.00792245	0.00380524	0.00263236	0.00807074	0.00628403	0.00332175	0.00819195	0.00780829	0.00775237	0.00107422	0.00120675	0.00122317	0.00111088	0.0028378	0.00373821
431	0.00773135	0.00382385	0.00272288	0.00806122	0.0062168	0.00334569	0.00812629	0.00777997	0.00771155	0.00109474	0.00110334	0.00126804	0.00105725	0.00284816	0.00365067
430	0.00765136	0.00383201	0.00273378	0.00793481	0.00621324	0.00347044	0.00800622	0.00767761	0.00760407	0.00137057	0.00131178	0.00149119	0.00110132	0.00309864	0.00375713
429	0.00742364	0.00375053	0.00269773	0.00774731	0.00603528	0.00331803	0.00776962	0.00732389	0.00746067	0.00141938	0.00151047	0.0015473	0.00122338	0.00316272	0.0036884
428	0.00732956	0.00371718	0.00282327	0.00771617	0.0059474	0.00329397	0.00774496	0.00717816	0.00744745	0.00138734	0.00157484	0.00161428	0.00149312	0.00316016	0.00360887
427	0.0075203	0.00404215	0.00302777	0.00785419	0.00605185	0.00353401	0.00769626	0.00740081	0.00751592	0.00141096	0.00127508	0.00149697	0.00147755	0.0030776	0.003759
426	0.00752483	0.00389903	0.00307953	0.00783809	0.00607603	0.00371271	0.0076321	0.00733082	0.00734419	0.00144367	0.00138031	0.0014304	0.00144306	0.00310615	0.00370336
425	0.00752889	0.00398509	0.0033974	0.00786591	0.00608145	0.00379329	0.00776746	0.00737873	0.00730148	0.0016671	0.00158805	0.00142455	0.00143269	0.00307156	0.00345731
424	0.00736628	0.003978	0.00338742	0.00765606	0.00607142	0.00380375	0.00756361	0.00730536	0.00721976	0.00160368	0.00164962	0.00172452	0.00162402	0.00334865	0.00366162
423	0.0073746	0.00417682	0.00354541	0.00760409	0.0060616	0.00396542	0.00760168	0.00736905	0.00730105	0.00142138	0.00168468	0.00169381	0.00145649	0.00322214	0.00387645
422	0.00719675	0.00426524	0.00356484	0.00741323	0.00607875	0.00400492	0.00764405	0.00729768	0.00717695	0.00147145	0.00173743	0.00191618	0.0014021	0.00326439	0.00392943
421	0.00701121	0.00418812	0.00350152	0.00732307	0.00601325	0.00393672	0.00741658	0.00722624	0.00703559	0.00155161	0.00190886	0.00175783	0.00160698	0.0032639	0.00382065
420	0.00692822	0.00416276	0.00369757	0.00716303	0.00591054	0.00401941	0.00733033	0.00707853	0.00694816	0.00168391	0.0019405	0.00173037	0.00176046	0.00330003	0.00380468
419	0.00684483	0.00419355	0.00377282	0.0070872	0.00587303	0.00406771	0.00737551	0.0069066	0.00696173	0.00178351	0.00181673	0.00186705	0.00155356	0.00327395	0.0039464
418	0.00698724	0.00434139	0.00397934	0.00704561	0.006124	0.00426015	0.00739902	0.00685666	0.0071253	0.00170747	0.00198761	0.00207238	0.00144267	0.00322437	0.00392587
417	0.00715495	0.00464628	0.00434407	0.0071898	0.00630931	0.00446433	0.00747295	0.00690493	0.0072922	0.00166486	0.00201702	0.00218017	0.00159294	0.00305077	0.00388001
416	0.00702161	0.0046543	0.00441424	0.00707824	0.00620741	0.00447912	0.00734366	0.00684005	0.00726428	0.00180986	0.00189954	0.00224668	0.00156782	0.00312323	0.00372858
415	0.0069632	0.00473073	0.00448248	0.00711482	0.00621026	0.0045499	0.00727468	0.00682706	0.00721936	0.00194123	0.00189583	0.0021307	0.00171267	0.00309024	0.0034093
414	0.00686502	0.00479794	0.00455716	0.00715846	0.00610408	0.00464024	0.00723501	0.00673071	0.00715572	0.00204185	0.0019314	0.00187834	0.00181736	0.00304756	0.00337726
413	0.00687599	0.00492814	0.00471645	0.0070265	0.00618704	0.00478232	0.00708986	0.00672583	0.00706943	0.00212999	0.0019755	0.00180868	0.00183441	0.00308602	0.00383636
412	0.0067551	0.00499752	0.00486191	0.0068911	0.00616465	0.00484215	0.00708018	0.00673724	0.00701942	0.00228331	0.00196141	0.00183379	0.00167928	0.00309665	0.00350906
411	0.00648766	0.00505671	0.00501469	0.00678603	0.00608646	0.0050454	0.0068743	0.00655552	0.00683518	0.00227311	0.0021039	0.00211347	0.00159955	0.00319975	0.00359055
410	0.00639136	0.00510516	0.00527091	0.00688999	0.00611731	0.00511614	0.00701336	0.0066703	0.00673235	0.00205373	0.0018266	0.00204321	0.00211284	0.00284968	0.00377477
409	0.0062981	0.00510728	0.0052639	0.00654332	0.00600487	0.0052464	0.00675819	0.00635912	0.00660796	0.00228636	0.0018718	0.00220133	0.00191467	0.00281804	0.00369951
408	0.00623659	0.00509148	0.00521949	0.00630682	0.00594245	0.00532262	0.00649759	0.00610164	0.00636792	0.00238227	0.00200585	0.00219451	0.00190329	0.00298079	0.00362795
407	0.00617645	0.00517856	0.00546921	0.00635721	0.00596449	0.00529271	0.00655704	0.00604146	0.00628992	0.00237427	0.00198953	0.00229402	0.00190475	0.00301429	0.00357777
406	0.00618638	0.00542964	0.00575613	0.00636879	0.00604152	0.00541128	0.00642974	0.00609491	0.00626939	0.00251365	0.00205888	0.00238133	0.00183241	0.00303365	0.00366618
405	0.00598612	0.00552747	0.0058159	0.00602384	0.00594948	0.0055536	0.00623232	0.00595313	0.00618376	0.00257406	0.00230709	0.00247585	0.00182963	0.00314033	0.00387163
404	0.00580642	0.00562963	0.0059047	0.00600046	0.00590352	0.00561972	0.00620066	0.00580197	0.00608678	0.00259676	0.00249735	0.0026462	0.00193563	0.00303453	0.00371976
403	0.00588304	0.00587311	0.00636339	0.00607254	0.00606825	0.00583416	0.00622886	0.00591545	0.00629758	0.0025266	0.00229398	0.00251514	0.00203988	0.00275883	0.00352804
402	0.00599144	0.0057506	0.00670047	0.00603083	0.00610822	0.00596133	0.00608631	0.00589502	0.00629188	0.00250171	0.00253985	0.00239746	0.00212968	0.00291	0.00328792
401	0.00590461	0.00583672	0.00686644	0.00597191	0.00602166	0.00615623	0.00609526	0.00574156	0.00604218	0.00290631	0.00271738	0.0025012	0.00223061	0.00327951	0.00316252
400	0.0058889	0.00617001	0.00707632	0.00599349	0.0061205	0.00645198	0.00605091	0.00581353	0.0060812	0.0028606	0.00257607	0.00248152	0.00221622	0.00313939	0.00346941
399	0.00583355	0.00623661	0.00702194	0.00595118	0.00608886	0.006546	0.00586538	0.00566221	0.00605257	0.00276697	0.00246501	0.00246994	0.00228013	0.00299295	0.00344948
398	0.00569943	0.0062122	0.00703534	0.00578325	0.00608151	0.00663872	0.00581806	0.00558387	0.00607417	0.00288383	0.00240541	0.00279225	0.00233044	0.0029517	0.00342142
397	0.00543975	0.00640401	0.00734652	0.00557995	0.00603477	0.00658467	0.0057051	0.00551524	0.00597605	0.00320365	0.00254689	0.0028319	0.0023621	0.00302376	0.00343753
396	0.0055273	0.00651213	0.00767122	0.005658	0.00603487	0.00667056	0.00571257	0.00548618	0.00584924	0.00331387	0.00276545	0.00290422	0.002433	0.00287516	0.00347896
395	0.00568567	0.00671081	0.00795426	0.0057286	0.00622062	0.00701565	0.00579527	0.00562303	0.00597104	0.00338834	0.00300614	0.00307503	0.00273659	0.00281916	0.00323564
394	0.00559226	0.00675833	0.0079483	0.00564758	0.00626808	0.00708322	0.00566089	0.00546937	0.00591525	0.00334272	0.00307673	0.00315077	0.00267535	0.00301712	0.0031711
393	0.00550509	0.00667985	0.00806602	0.00543158	0.00617875	0.00718658	0.00545443	0.00526093	0.00571443	0.003286	0.00319345	0.003121	0.00257866	0.00326885	0.00317201
392	0.00539471	0.00693868	0.00828805	0.00546243	0.00627651	0.00724278	0.00548037	0.00534256	0.00567507	0.00344029	0.00313653	0.00318189	0.00275039	0.00315584	0.00304658
391	0.00523064	0.00701874	0.00833806	0.00539119	0.0063207	0.00734012	0.00543192	0.00530841	0.00571225	0.00352518	0.00326475	0.00332244	0.00262172	0.00297806	0.00308359
390	0.00529592	0.00726841	0.00872785	0.00548302	0.00629734	0.00772334	0.00550156	0.0054072	0.00581741	0.00347844	0.00349746	0.00365129	0.00265158	0.00318865	0.00339569
389	0.00518138	0.00727636	0.00884959	0.00538026	0.00618349	0.00785595	0.00543715	0.00525944	0.00574284	0.00402783	0.00348157	0.00377665	0.0032121	0.00318615	0.00349684
388	0.00516903	0.00720311	0.00885165	0.00529869	0.00633399	0.00783438	0.00535744	0.00515303	0.00561089	0.00406293	0.00353794	0.00382513	0.00330713	0.003298	0.00356008
387	0.00525988	0.0073831	0.0090797	0.00523569	0.00640431	0.00800571	0.00533586	0.00517001	0.00570335	0.00413271	0.00379042	0.0039643	0.00330054	0.0033508	0.00351436
386	0.00501638	0.00724395	0.0088823	0.00490977	0.00621809	0.00787008	0.00499667	0.00495712	0.00549261	0.00426134	0.00387886	0.00391846	0.00344493	0.00330851	0.00319874
385	0.00495791	0.00736132	0.00901488	0.00492412	0.00630809	0.00802055	0.00513964	0.0048373	0.00547039	0.0042782	0.00411408	0.00429845	0.0035623	0.00330001	0.0032729
384	0.00494587	0.0075698	0.00931102	0.00492305	0.00631282	0.00830471	0.00519545	0.00479184	0.0055176	0.00431006	0.00411821	0.00430141	0.0033855	0.00330752	0.00336927
383	0.00519435	0.00780835	0.00951745	0.00503489	0.00650337	0.00838831	0.00507559	0.00490687	0.00570521	0.0046011	0.00437726	0.00423295	0.00370948	0.00340858	0.00336402
382	0.00516438	0.00770823	0.00962989	0.004936	0.0064651	0.00840336	0.00507472	0.00481352	0.00569072	0.00453418	0.00427091	0.00455597	0.00395084	0.00337102	0.00330112
381	0.00506995	0.00779911	0.00968629	0.00497324	0.0063444	0.00843854	0.0050072	0.00465588	0.00551585	0.00457109	0.00426405	0.00468146	0.00396181	0.00336704	0.00327067
380	0.00513699	0.00807627	0.00998512	0.00524524	0.00653522	0.00869949	0.00518258	0.00484019	0.00560726	0.00461189	0.00450231	0.00461017	0.00389626	0.00334197	0.00329128
379	0.00497609	0.00799838	0.00987022	0.00495701	0.00642356	0.00857946	0.00502575	0.00470399	0.00544014	0.00468604	0.00461813	0.00471277	0.00410555	0.00320774	0.00321863
378	0.00506597	0.00806268	0.0100657	0.00476914	0.00650626	0.0086636	0.00507859	0.00471235	0.00547029	0.00470471	0.00472167	0.00464512	0.0041287	0.00314451	0.00319684
377	0.00501169	0.0082366	0.0102039	0.00490151	0.00657807	0.008755	0.00508953	0.00467679	0.00549506	0.0048869	0.00480223	0.00488747	0.0042172	0.00314285	0.0031236
376	0.00496039	0.00820451	0.0102418	0.00493109	0.00660446	0.00877261	0.00495547	0.00456754	0.00559471	0.00501966	0.00494283	0.0050098	0.0043412	0.00323639	0.00348206
375	0.00504916	0.0084012	0.0104549	0.00485546	0.00664774	0.0087676	0.00496069	0.00470299	0.00556228	0.00506633	0.00502991	0.00489504	0.00442637	0.00316563	0.00334963
374	0.00512276	0.00837297	0.0104234	0.0048554	0.00666324	0.00880995	0.00496594	0.00484864	0.00548356	0.00515162	0.00494873	0.00491221	0.00463033	0.00302669	0.00302428
373	0.0049633	0.00816732	0.0103194	0.00484567	0.006622	0.00882856	0.00489253	0.00460064	0.00534628	0.00538985	0.00523379	0.00515276	0.00470216	0.00336432	0.00314474
372	0.00496655	0.00833686	0.0105832	0.00501028	0.00648563	0.00893833	0.00493694	0.00474712	0.00568604	0.00530065	0.00532537	0.00533916	0.00457138	0.00347355	0.0032842
371	0.00510318	0.00831864	0.0106592	0.0049869	0.00664671	0.00906875	0.00497174	0.00492348	0.00567587	0.00515891	0.00526785	0.00533503	0.00459626	0.00350171	0.00333278
370	0.00516297	0.0084293	0.0107891	0.00499189	0.00678253	0.00892244	0.00495563	0.00490271	0.00549162	0.00531548	0.0051238	0.00537002	0.00480508	0.00357591	0.00337922
369	0.00512286	0.00843443	0.0105782	0.00498286	0.00674644	0.00881872	0.00476249	0.00495682	0.00552523	0.00536864	0.00567419	0.00528462	0.00476409	0.00371051	0.00327879
368	0.00523798	0.00858353	0.010705	0.00523587	0.00673433	0.00890912	0.00492121	0.00492625	0.0056372	0.00544785	0.00571923	0.00542166	0.00516795	0.003721	0.00328842
367	0.00550651	0.00858844	0.0108941	0.00515638	0.00689264	0.00904141	0.00516702	0.00508472	0.00570222	0.00565263	0.00545746	0.00574274	0.00523034	0.0036138	0.00345224
366	0.00542653	0.00868191	0.0107945	0.00508358	0.00683911	0.00916701	0.00523556	0.00496027	0.00578533	0.00571888	0.00533198	0.00575799	0.00492023	0.00349798	0.00332821
365	0.00539877	0.00868757	0.0107855	0.0052722	0.00683695	0.0090566	0.00512845	0.00513259	0.00575716	0.0054942	0.00556717	0.00548771	0.0050282	0.00356368	0.00316155
364	0.00533312	0.00846787	0.0106491	0.00523571	0.00679326	0.00898887	0.00498809	0.00519749	0.005664	0.00558991	0.00572998	0.00567548	0.00519717	0.00374335	0.0033491
363	0.00535783	0.00849901	0.0107314	0.00515646	0.00684745	0.00904261	0.00505753	0.00502665	0.00583776	0.00564176	0.00558868	0.0060326	0.00533358	0.00381401	0.00354061
362	0.00538031	0.0085213	0.0108014	0.00525513	0.00676279	0.00882202	0.00502516	0.00497029	0.00568224	0.00566243	0.0056494	0.00588805	0.00516266	0.00393307	0.0033724
361	0.00545696	0.00860624	0.0108056	0.00542334	0.00688738	0.00889482	0.00516472	0.00505908	0.00593836	0.00561022	0.0059211	0.00605176	0.00522137	0.00415181	0.00339741
360	0.00549731	0.00850849	0.0108491	0.00527412	0.00696887	0.0088861	0.00523251	0.00502202	0.00599362	0.0055028	0.00593141	0.00595165	0.0049585	0.00394607	0.00344347
359	0.00531035	0.00827893	0.0106053	0.00504988	0.00679817	0.00865922	0.00519707	0.00484567	0.00584497	0.00529604	0.00556566	0.00570934	0.0048424	0.00364024	0.00350077
358	0.00546902	0.00830514	0.0105874	0.00506793	0.00662034	0.00866862	0.00535501	0.00477232	0.0057668	0.00560436	0.00567769	0.00565947	0.00518374	0.00394935	0.00333906
357	0.00541285	0.00819205	0.0105126	0.00523096	0.00656369	0.00864265	0.0052	0.00479881	0.00580046	0.00580367	0.00595387	0.0057548	0.00528828	0.00392625	0.0030649
356	0.0053961	0.00812487	0.0103332	0.00524195	0.00662091	0.00859056	0.00516109	0.00492766	0.00580159	0.00572549	0.00594037	0.00593682	0.00501182	0.00360995	0.00351474
355	0.0054191	0.00823508	0.0103358	0.00530572	0.00678358	0.00861419	0.00532172	0.00510529	0.00583249	0.00546234	0.00591059	0.00602571	0.00519088	0.00377677	0.00366188
354	0.00570118	0.00845175	0.0104818	0.00551173	0.00697119	0.0086289	0.00558277	0.00535026	0.00609445	0.00532568	0.0058961	0.00602274	0.00517118	0.00380919	0.00348011
353	0.00577428	0.00842594	0.0105013	0.00545158	0.00675021	0.00867006	0.00550708	0.00527063	0.00609552	0.00537293	0.00574577	0.0058392	0.00502387	0.0036835	0.00350082
352	0.00574881	0.00824751	0.0103713	0.00542295	0.00659856	0.0086712	0.00539757	0.00530676	0.00605798	0.00562911	0.00563834	0.00564783	0.00514066	0.00358212	0.00338548
351	0.00588847	0.00834128	0.01047	0.00574385	0.00680529	0.0087335	0.00579	0.00543615	0.00613476	0.00576293	0.00575412	0.00613648	0.00530751	0.00374973	0.00363888
350	0.00584873	0.0081048	0.0103002	0.00562317	0.00666995	0.00859079	0.00578895	0.00523869	0.00584461	0.00567558	0.00575769	0.00589528	0.00525469	0.00384281	0.0036147
349	0.00594603	0.00794168	0.0101167	0.00561022	0.00652659	0.00838643	0.00569744	0.00515342	0.00590642	0.00566226	0.00578202	0.00559562	0.0052259	0.00375539	0.00357614
348	0.00589207	0.00789804	0.0100222	0.00548122	0.00642752	0.0081299	0.00548853	0.00501875	0.00582081	0.00551115	0.00580353	0.00586024	0.00528381	0.00396131	0.00352209
347	0.00594032	0.00798034	0.0100175	0.00564248	0.00651049	0.0080942	0.00550985	0.00510654	0.00580733	0.00542067	0.00561273	0.00574015	0.00537811	0.00387426	0.00341681
346	0.00597634	0.00793508	0.00991964	0.00565461	0.00649853	0.00815217	0.00566998	0.00535982	0.00602254	0.00528756	0.00541135	0.00566607	0.00529155	0.003692	0.0033768
345	0.00596955	0.00774846	0.00964253	0.00564713	0.00640397	0.00813523	0.00563195	0.00538802	0.00602212	0.00526386	0.00534149	0.00603258	0.00525601	0.00372813	0.00371421
344	0.00600865	0.00769229	0.00959556	0.00568585	0.00644375	0.0079768	0.00571675	0.00538149	0.00589929	0.00511662	0.0055299	0.00589997	0.00501706	0.00376729	0.00385115
343	0.00630618	0.00773193	0.00970457	0.00609666	0.00668197	0.00801254	0.0059224	0.00541273	0.00609166	0.00492949	0.00557559	0.00578193	0.00490982	0.00385331	0.00360794
342	0.00633301	0.00776551	0.00965215	0.00613315	0.00667817	0.00792979	0.00595963	0.00537141	0.00618509	0.00507906	0.00538133	0.00577437	0.00485036	0.00396911	0.00350683
341	0.00649154	0.00776131	0.00965818	0.0060806	0.00657286	0.00773809	0.00618619	0.00528261	0.00619006	0.00503145	0.00514854	0.0060198	0.00493747	0.00379318	0.00361207
340	0.00644786	0.00763213	0.00969485	0.00625396	0.00667015	0.00747286	0.0060793	0.00559759	0.00591396	0.00501939	0.00504238	0.00516747	0.00465942	0.0035628	0.00289991
339	0.006745	0.00798347	0.00989965	0.00653516	0.00684996	0.00749268	0.00632637	0.00580003	0.00613593	0.00499888	0.0048377	0.00520408	0.00458024	0.00354918	0.00308005
338	0.00676092	0.00791291	0.00974859	0.00658917	0.00699164	0.00751686	0.00633434	0.00582745	0.00617316	0.00484591	0.00487446	0.00532059	0.00476063	0.00371549	0.00305639
337	0.00691081	0.00770176	0.00967087	0.00674952	0.00695066	0.0075871	0.0064435	0.00570783	0.00631661	0.00476882	0.00479307	0.00525095	0.00469222	0.00367443	0.00277512
336	0.00694946	0.007662	0.00967468	0.0069714	0.00693204	0.00756456	0.00651301	0.00572561	0.00647637	0.00468363	0.00490236	0.0049288	0.00432223	0.0036655	0.0028208
335	0.00700038	0.00768027	0.00958888	0.00692688	0.00691955	0.00742185	0.00648654	0.00568547	0.00638515	0.00448578	0.00486103	0.00489405	0.00423537	0.00371736	0.0027553
334	0.00699735	0.00751545	0.00935637	0.00684643	0.00673521	0.00735709	0.00651224	0.00556716	0.00625939	0.0046344	0.00493716	0.00486528	0.00444339	0.00377648	0.00279563
333	0.00702691	0.00728693	0.00923658	0.00694344	0.00664742	0.00729857	0.00662426	0.00541849	0.00620003	0.00469493	0.00483882	0.00474372	0.00445442	0.00369323	0.00273227
332	0.00710724	0.00716731	0.00901913	0.00708362	0.00658693	0.00718471	0.00672008	0.00541706	0.00620902	0.00462371	0.00463443	0.00479964	0.00427374	0.00368358	0.00281414
331	0.00719982	0.0072154	0.00904292	0.00710874	0.00643906	0.00706212	0.00673149	0.00544013	0.00624842	0.0046155	0.00452528	0.00485841	0.00415836	0.00377784	0.00284911
330	0.0074438	0.00732489	0.00931754	0.0073334	0.00667436	0.00729892	0.00694232	0.00571636	0.0064432	0.00436255	0.00438848	0.00461717	0.00419237	0.00366113	0.00248413
329	0.0075991	0.00735223	0.00920544	0.00733362	0.00672871	0.00709805	0.00708076	0.00567854	0.00641109	0.00402181	0.00466339	0.00480103	0.00401361	0.00388864	0.00242409
328	0.00756993	0.00721564	0.00902879	0.00734344	0.00653189	0.00697114	0.00717874	0.00547185	0.00617713	0.00418155	0.00442932	0.00471363	0.00411656	0.00384147	0.00264779
327	0.00784222	0.00706644	0.00916461	0.00748445	0.00661715	0.00711945	0.00723313	0.0055666	0.00623302	0.00399774	0.00448825	0.00421857	0.0038958	0.00376361	0.00278363
326	0.00804641	0.00698835	0.00907035	0.00765036	0.00642617	0.00693317	0.00742194	0.005474	0.00628378	0.00415543	0.00459062	0.0045883	0.00411591	0.00403561	0.00297286
325	0.00815993	0.00691038	0.00901678	0.00775478	0.00630641	0.00685708	0.00754473	0.00559359	0.00651434	0.00438797	0.00430224	0.0049431	0.00423527	0.00386237	0.0031788
324	0.00819302	0.0070008	0.00917625	0.00802641	0.00643274	0.00681972	0.00753317	0.00560442	0.00650327	0.00428797	0.0044545	0.00484135	0.00415002	0.00377243	0.00317116
323	0.00865951	0.00738296	0.00940346	0.00835307	0.00668472	0.00699795	0.00785329	0.00572739	0.00650499	0.00416935	0.00431551	0.00479909	0.00417657	0.00366902	0.00313524
322	0.00878296	0.00731246	0.00917944	0.00837125	0.00652193	0.0069554	0.00813576	0.00580092	0.00642079	0.00414061	0.00408371	0.00454674	0.00396787	0.00366648	0.00279657
321	0.00878041	0.00707497	0.00913093	0.0084822	0.00642083	0.00692893	0.00819649	0.00570309	0.00647921	0.00403779	0.00437946	0.00453288	0.00382358	0.00389849	0.00260509
320	0.00886778	0.00712589	0.00911531	0.00860847	0.00641914	0.0069147	0.00836227	0.00568698	0.00649805	0.00414272	0.00431747	0.00456681	0.00386138	0.00396711	0.0028405
319	0.00897522	0.00711358	0.0089671	0.00873085	0.00648602	0.00676468	0.00858637	0.0056904	0.00650059	0.00431573	0.00407658	0.00459385	0.00390537	0.00389329	0.00301363
318	0.00935348	0.00713104	0.00894851	0.00886828	0.00660369	0.00681117	0.00874496	0.00573934	0.00649238	0.00426312	0.00404419	0.0043131	0.00405798	0.00410411	0.00280561
317	0.00958029	0.00708366	0.00903123	0.00896032	0.00674243	0.00687058	0.00887662	0.00573427	0.0064711	0.00416654	0.00409614	0.00435192	0.00400766	0.00405389	0.00301212
316	0.0097797	0.00710498	0.00915268	0.00923277	0.00672042	0.00692071	0.00912549	0.00580085	0.00630174	0.00412009	0.00420389	0.00432843	0.00371827	0.00406605	0.0029232
315	0.0100427	0.00699639	0.00915194	0.00929773	0.00665831	0.00689804	0.00911976	0.00576712	0.00627646	0.00414874	0.00421101	0.00444106	0.00388014	0.00425899	0.00292804
314	0.0103787	0.0071584	0.00930022	0.0098076	0.00672153	0.00708461	0.00951103	0.00593236	0.00656112	0.00433333	0.00413909	0.00451259	0.00395562	0.00436455	0.00296273
313	0.0106896	0.00734693	0.00937736	0.0103315	0.00692412	0.00709475	0.00987879	0.00614762	0.00687365	0.00420071	0.00399935	0.00440182	0.00381485	0.00437323	0.00307757
312	0.0109304	0.00746065	0.00952095	0.0104644	0.00711582	0.00715969	0.010146	0.00623849	0.00695177	0.00430424	0.00423773	0.00473193	0.00393501	0.00449372	0.00341697
311	0.0112134	0.00758231	0.00970673	0.0107693	0.00724494	0.00726613	0.0104681	0.00631434	0.00698221	0.00449724	0.00459813	0.00515168	0.00404718	0.0045849	0.00395404
310	0.0114307	0.00761183	0.00981723	0.0109969	0.00730348	0.00724806	0.0106298	0.00622843	0.00705814	0.00448451	0.00452303	0.0051907	0.00424406	0.00459965	0.00401438
309	0.0119058	0.00795282	0.0100276	0.0115072	0.00762028	0.00746939	0.0110389	0.00664822	0.00726777	0.00469784	0.0046653	0.00528276	0.00458292	0.00468746	0.0040755
308	0.0126083	0.00826093	0.010356	0.0119601	0.00794229	0.00785828	0.0115634	0.00698343	0.00759883	0.00481295	0.00486714	0.00550439	0.00492839	0.00479163	0.00457133
307	0.0133101	0.00853376	0.0108118	0.0125943	0.0084897	0.00838503	0.0122256	0.00727883	0.00797568	0.00519081	0.0050278	0.00566704	0.00520642	0.00534136	0.00476189
306	0.0141508	0.00930618	0.0115023	0.0135879	0.00918678	0.00893622	0.0129389	0.00791944	0.0086558	0.00562503	0.00565408	0.00634735	0.00569223	0.00619673	0.0051876
305	0.0151458	0.00997414	0.0121005	0.014367	0.00976187	0.00950502	0.0138053	0.00846861	0.00928867	0.00650267	0.00625188	0.00704635	0.00635456	0.00677885	0.00596504
304	0.0162755	0.0109468	0.0130257	0.015486	0.0107771	0.0103906	0.0150276	0.00932482	0.00998089	0.00734169	0.00728235	0.00774935	0.00689273	0.00763624	0.00692858
303	0.017673	0.0119753	0.0140279	0.0168046	0.0118875	0.0113525	0.016223	0.0104195	0.0109578	0.00827343	0.00827244	0.00861028	0.00793491	0.00853409	0.00757447
302	0.0195595	0.0136084	0.0156101	0.0187303	0.0134796	0.0129779	0.017925	0.0120249	0.0124758	0.00927783	0.00932508	0.00989155	0.00924508	0.00970473	0.00855014
301	0.0216332	0.0154194	0.01733	0.0208853	0.0152116	0.0147861	0.0200197	0.013802	0.014356	0.010853	0.0106479	0.0109942	0.0107111	0.011201	0.00971026
300	0.0238063	0.0174803	0.0192833	0.0231531	0.0172214	0.0168042	0.0223031	0.0157542	0.0164022	0.0123305	0.0122232	0.0127379	0.0122429	0.0128068	0.0117121
299	0.0263242	0.0199392	0.0217464	0.0258602	0.0198119	0.0190067	0.0248108	0.0180757	0.0185865	0.0142214	0.0139602	0.0146429	0.0141824	0.0146431	0.0138905
298	0.0295053	0.0226282	0.0246737	0.0289287	0.0226504	0.0217296	0.0277754	0.020728	0.0213131	0.0165297	0.0161641	0.0168489	0.0164612	0.0169909	0.0161889
297	0.0330265	0.0260288	0.0280606	0.0324545	0.0260729	0.0249461	0.0312593	0.0240234	0.0248574	0.0190167	0.0187042	0.0195736	0.0191674	0.019564	0.0188892
296	0.0370631	0.0299139	0.0320368	0.0364711	0.0299359	0.0289263	0.0351732	0.0276932	0.0284782	0.0222171	0.0218344	0.0225951	0.0226971	0.0227241	0.0217845
295	0.0417525	0.0346158	0.0365759	0.0411014	0.0346724	0.0336111	0.0398004	0.0319967	0.0327379	0.0261722	0.0255401	0.0263246	0.026739	0.0266372	0.0256501
294	0.0469218	0.0396847	0.0416783	0.0462789	0.0399537	0.038654	0.0446512	0.0371214	0.0375901	0.0303196	0.0299109	0.0305654	0.0311182	0.0310436	0.0301907
293	0.0523504	0.0449889	0.0471168	0.0515741	0.0450363	0.0439381	0.0496846	0.0421643	0.0425969	0.0346241	0.0343591	0.0350361	0.0357657	0.0355698	0.0343664
292	0.0574597	0.0497139	0.0517923	0.0563875	0.0497913	0.0487617	0.0543869	0.0466063	0.0471349	0.0384427	0.0377612	0.0387014	0.0397434	0.0392635	0.0382794
291	0.0613158	0.0535909	0.0554043	0.0603502	0.0535632	0.0525151	0.0581419	0.0503422	0.0508249	0.0413488	0.0403387	0.0411688	0.0429029	0.0420626	0.0410378
290	0.0647931	0.0571477	0.0589207	0.0638909	0.0571221	0.0557761	0.0615506	0.0536975	0.0541756	0.0433909	0.0426488	0.0433429	0.0450968	0.0444034	0.0432731
289	0.0688299	0.0609118	0.0629429	0.0677474	0.06112	0.0595208	0.0654303	0.0572226	0.0580281	0.0455794	0.0447464	0.0454781	0.0472907	0.0466739	0.0455847
288	0.073049	0.0651412	0.066999	0.0721463	0.0653897	0.0637207	0.0695824	0.0612389	0.0620091	0.0484031	0.047782	0.0483264	0.0503804	0.0497422	0.0484336
287	0.0776996	0.0698795	0.0716522	0.0769191	0.0700605	0.068198	0.0742896	0.0659294	0.0664514	0.052215	0.0512624	0.0518292	0.0540289	0.0532608	0.0519486
286	0.0823387	0.074447	0.0761935	0.0814852	0.0746497	0.0728334	0.0785766	0.0706262	0.0709045	0.0556814	0.0545162	0.0550652	0.0576788	0.056438	0.055204
285	0.0868002	0.0787111	0.0804261	0.0855971	0.0787137	0.0770389	0.0826321	0.0746181	0.075007	0.0584176	0.0571936	0.0579546	0.0607442	0.0594346	0.0580254
284	0.090168	0.0821014	0.0838747	0.0889618	0.0820582	0.0804151	0.0860372	0.0778133	0.0782723	0.0604549	0.0592148	0.0596954	0.0627366	0.061688	0.0601536
283	0.0930862	0.084846	0.0867358	0.0918879	0.0850232	0.0832622	0.0887046	0.0806249	0.0809521	0.0618037	0.0604141	0.0610047	0.0640747	0.0628942	0.0616273
282	0.0954715	0.0872133	0.0890856	0.0944235	0.0874525	0.08578	0.0909924	0.083012	0.0833922	0.0627834	0.0613715	0.0619311	0.0653473	0.0636338	0.0626503
281	0.0977061	0.0896082	0.0914415	0.0967976	0.089817	0.0881456	0.093297	0.0852399	0.0857624	0.0633979	0.0620806	0.0622984	0.0658995	0.0643658	0.0631723
280	0.0998826	0.0916411	0.0934081	0.0988039	0.0919095	0.0901593	0.0953843	0.0872183	0.0879303	0.0638986	0.0621588	0.0623772	0.0662561	0.0647396	0.0633586
279	0.101687	0.0933696	0.0951784	0.100639	0.0936097	0.0918387	0.0970511	0.0888752	0.089646	0.0641408	0.0624904	0.0625498	0.0666252	0.0648748	0.0634627
278	0.103299	0.0949247	0.0966833	0.102111	0.0952582	0.0935265	0.098525	0.0904513	0.0912159	0.0639998	0.0624966	0.0628832	0.0662395	0.0648142	0.0636263
277	0.104952	0.0964753	0.0982619	0.103773	0.0969094	0.0950454	0.100014	0.0920975	0.0927112	0.063662	0.0623264	0.0626237	0.0657562	0.0645187	0.0629573
276	0.106279	0.0977732	0.0996765	0.105157	0.0981595	0.096235	0.101148	0.0934998	0.0939149	0.06308	0.0619562	0.0622858	0.0653567	0.0640487	0.0625807
275	0.107205	0.0986672	0.100773	0.105985	0.0989965	0.0972728	0.10204	0.094278	0.0949373	0.062747	0.0612924	0.061684	0.0648837	0.0634988	0.0618489
274	0.107974	0.099277	0.101356	0.106534	0.0996628	0.0981049	0.102844	0.0948603	0.0956964	0.0619904	0.0605773	0.0607919	0.0638513	0.0626382	0.0609229
273	0.108522	0.0999551	0.101797	0.10713	0.100199	0.0985707	0.103271	0.0953939	0.0961727	0.0610919	0.0596531	0.059723	0.0629323	0.0617098	0.0600321
272	0.108915	0.100614	0.102403	0.107436	0.100654	0.0992223	0.103795	0.0959249	0.0967251	0.0599474	0.058527	0.0588258	0.0620121	0.0607111	0.0590773
271	0.109341	0.101124	0.10291	0.107935	0.101138	0.0998036	0.104154	0.0963931	0.0972838	0.058802	0.0573204	0.0578059	0.0607584	0.0595856	0.0581408
270	0.109798	0.101639	0.10334	0.108268	0.1015	0.100261	0.104291	0.0969887	0.097784	0.0575663	0.0562185	0.0566253	0.0596125	0.0583636	0.0568653
269	0.10992	0.101695	0.10355	0.108345	0.10164	0.100467	0.104328	0.0969806	0.097846	0.0562573	0.0551679	0.055538	0.0580484	0.0572439	0.0555381
268	0.109813	0.101777	0.103615	0.108334	0.101592	0.100671	0.104309	0.0969735	0.0979508	0.0548104	0.053859	0.0540202	0.0563082	0.0557474	0.0539403
267	0.10993	0.101949	0.103745	0.108422	0.101738	0.100865	0.104234	0.0971184	0.0982288	0.053305	0.0525324	0.0530624	0.0546978	0.0544426	0.0527257
266	0.109831	0.101929	0.103899	0.108125	0.101618	0.100683	0.104156	0.0970376	0.0981868	0.0522653	0.0514157	0.0515011	0.0535291	0.0533784	0.05136
265	0.108981	0.10128	0.103607	0.107378	0.100964	0.100268	0.103593	0.0963907	0.0975982	0.0512356	0.0501597	0.050066	0.0523254	0.0516975	0.0500003
264	0.108508	0.100977	0.103393	0.106843	0.10057	0.100152	0.103068	0.0959173	0.0972403	0.049542	0.0483298	0.0487777	0.0507672	0.0500288	0.0483584
263	0.107962	0.100594	0.103053	0.106241	0.0999942	0.0998727	0.102442	0.095626	0.0969032	0.0479649	0.0469026	0.0472758	0.0493258	0.0485264	0.0469069
262	0.107431	0.100275	0.102645	0.105631	0.0993938	0.0994789	0.101688	0.0951132	0.0966697	0.0468873	0.0455897	0.0462003	0.0480104	0.0471243	0.0454686
261	0.106975	0.100063	0.102526	0.105135	0.0990436	0.0993222	0.10126	0.0947219	0.0964004	0.0456371	0.0443877	0.0453774	0.0467043	0.0458073	0.044324
260	0.106206	0.0993158	0.102014	0.104465	0.0982196	0.0985975	0.100532	0.0939559	0.0958846	0.0444995	0.0433979	0.0443909	0.0454952	0.0447411	0.0433009
259	0.104919	0.0981098	0.101063	0.102999	0.0968313	0.0974397	0.099277	0.0927002	0.0947481	0.0431908	0.0420738	0.0426897	0.0438828	0.0436337	0.0416163
258	0.103229	0.0967131	0.0997633	0.101337	0.0953467	0.0960687	0.0977109	0.091263	0.0933357	0.0415411	0.0405322	0.041259	0.0421399	0.0421513	0.0400632
257	0.101534	0.0952812	0.0984343	0.0996644	0.093954	0.0946541	0.0959941	0.089914	0.0919415	0.0398525	0.0389345	0.0397214	0.0404951	0.040406	0.0384745
256	0.100155	0.0941492	0.0974919	0.0982138	0.0928416	0.0934648	0.0945618	0.0886507	0.0907882	0.0385814	0.0376763	0.038853	0.0391449	0.0391598	0.0376827
255	0.098606	0.0929702	0.0963801	0.0965886	0.0913987	0.0923153	0.0930065	0.0872833	0.0895832	0.0378083	0.0368846	0.0383992	0.0382103	0.0384265	0.0370748
254	0.0971373	0.0918132	0.0951233	0.0948919	0.08995	0.0911026	0.0912765	0.0860387	0.0885626	0.0368532	0.036344	0.0374792	0.0372439	0.0378155	0.0361249
253	0.0956175	0.0906182	0.093963	0.093125	0.0887107	0.0898564	0.0896211	0.0846789	0.0873431	0.0360465	0.0356541	0.0365307	0.036451	0.0371615	0.0351094
252	0.0935669	0.0890222	0.0924403	0.0911792	0.0871524	0.0883334	0.0877833	0.0830098	0.0858667	0.0352997	0.0347153	0.035448	0.0356516	0.0361374	0.0340895
251	0.0917794	0.0876436	0.0913376	0.0892588	0.0856921	0.0870633	0.0860295	0.0816174	0.0847626	0.0347364	0.0339026	0.0350851	0.0349784	0.0352049	0.0333877
250	0.090095	0.0864961	0.0903787	0.0875783	0.0843506	0.0858447	0.0843336	0.0802905	0.0837146	0.034321	0.0337783	0.034864	0.0347593	0.0350252	0.0331149
